# Supplementary material
Source: PubMed Central journal article supplement (PMC7035108)

## Supplemental Data 1. Metabolite abundance profiles for nLC-QEx data.

Cell-cycle dependent abundance profiles of metabolite features detected via the method nLC-QEx (negative mode); blue profiles are from synchronized, red from control cultures. Mean values  $\pm$  SD are shown (3 biological replicates per condition). The time-point (box) labeled "exp" indicates respective exponentially growing pre-cultures (n=6).

synchronized

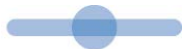

control

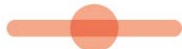

idms\_pid6\_mz232.99

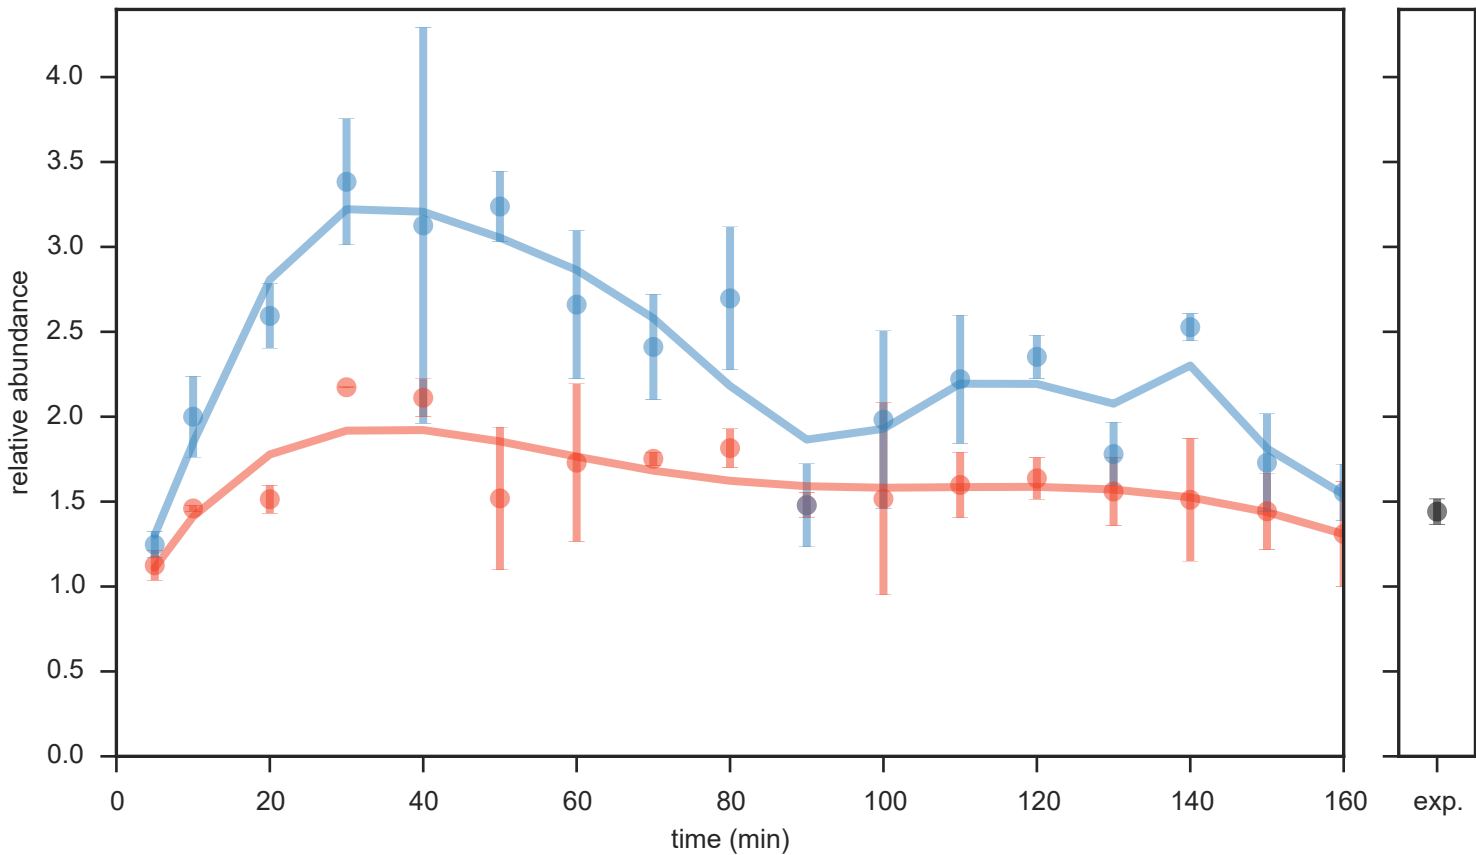

idms\_pid7\_mz292.05

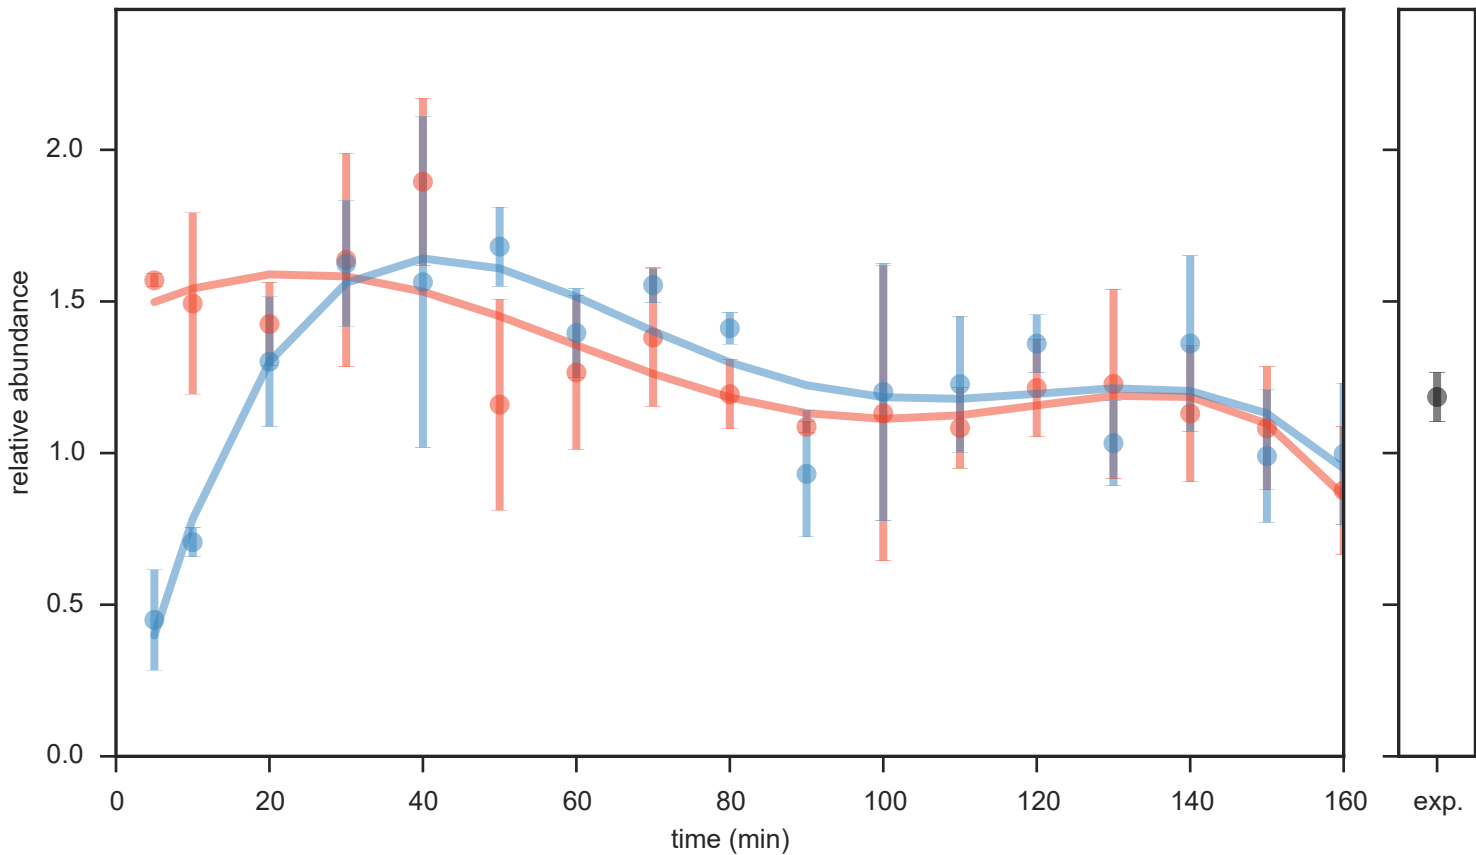

idms\_pid9\_mz218.10

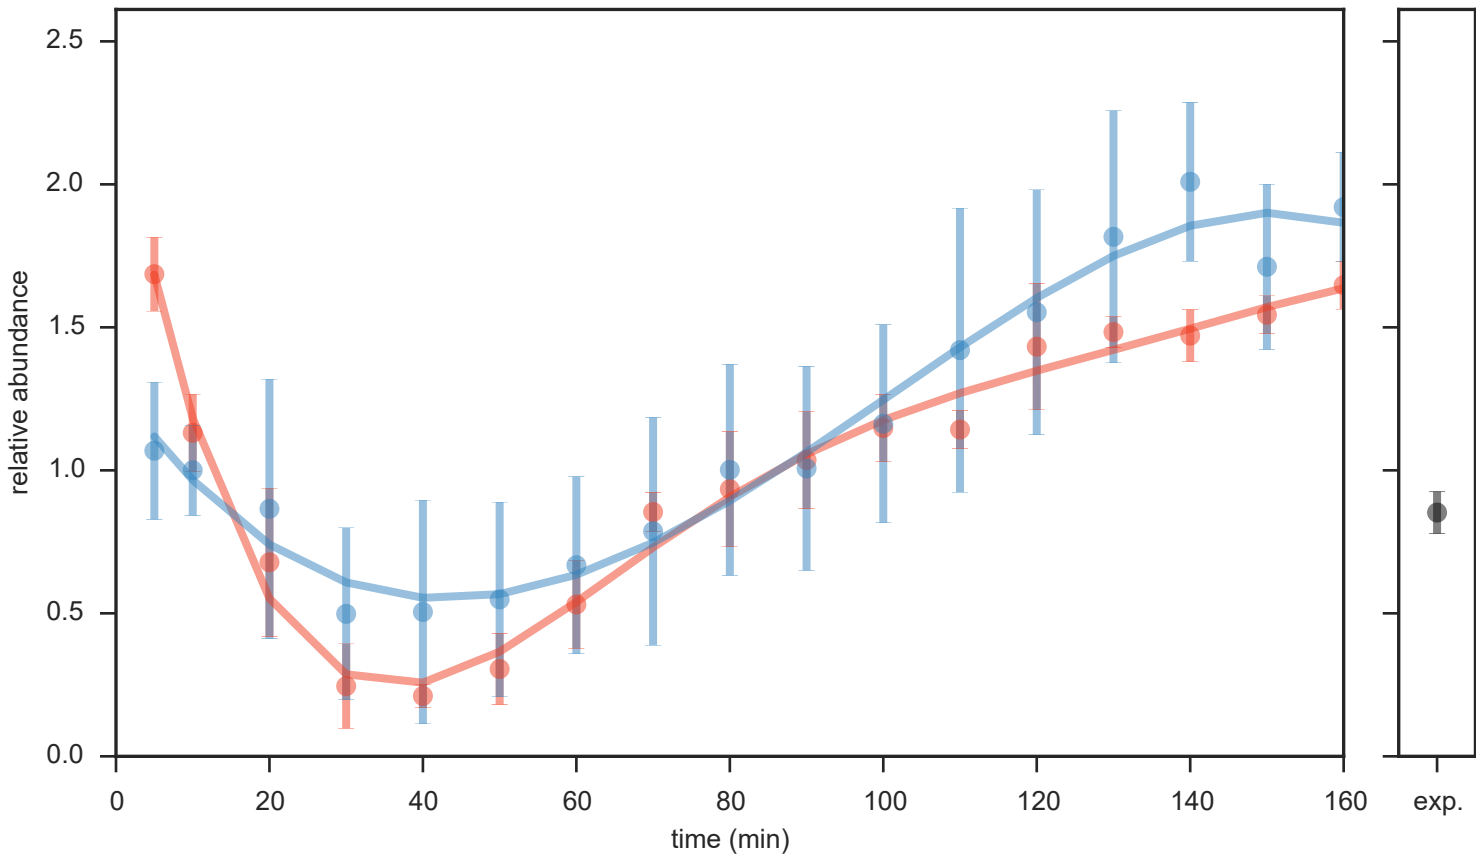

idms\_pid11\_mz175.02

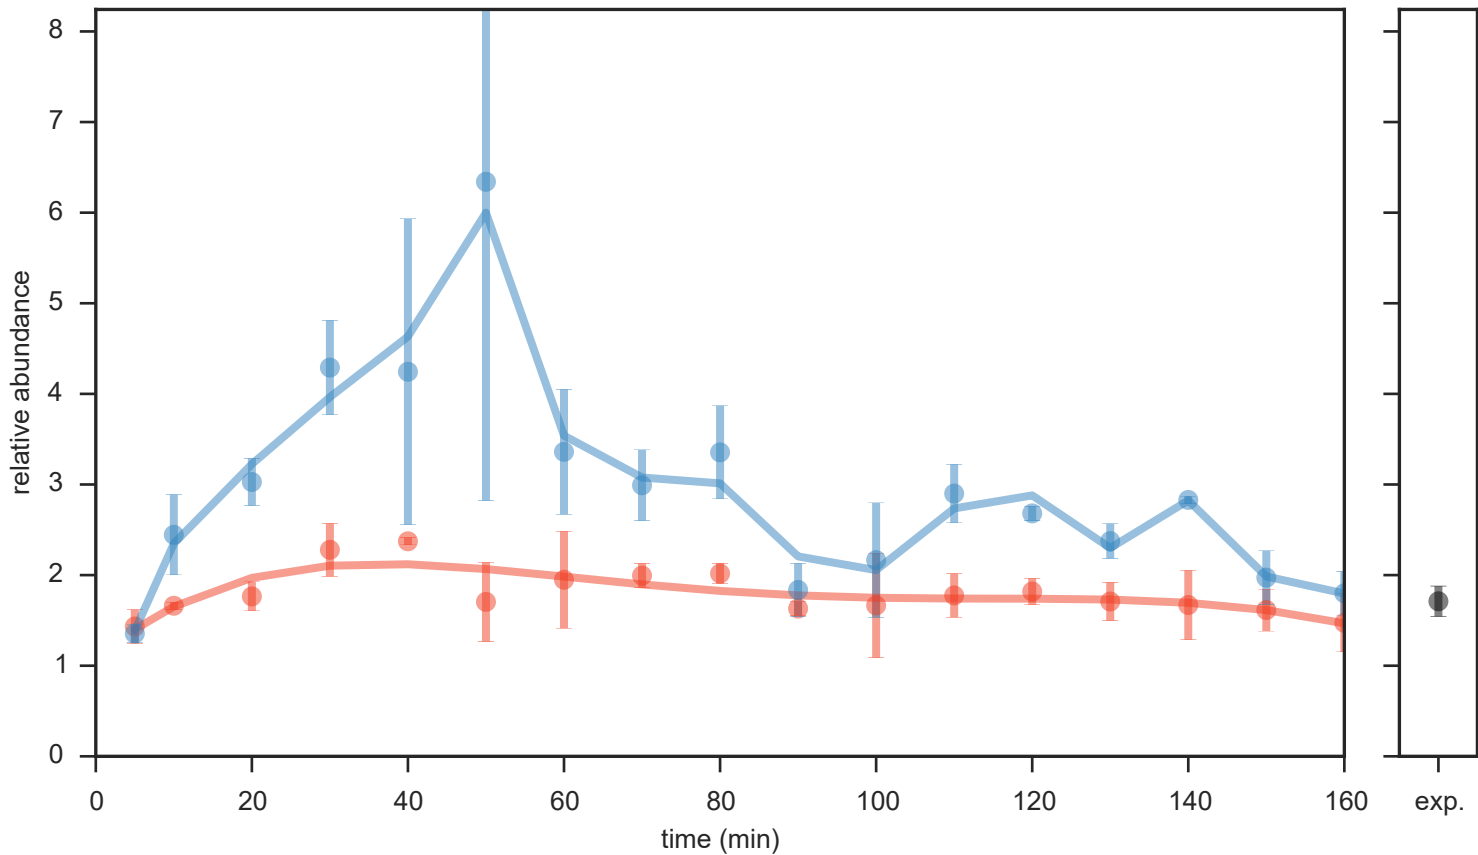

idms\_pid20\_mz243.02

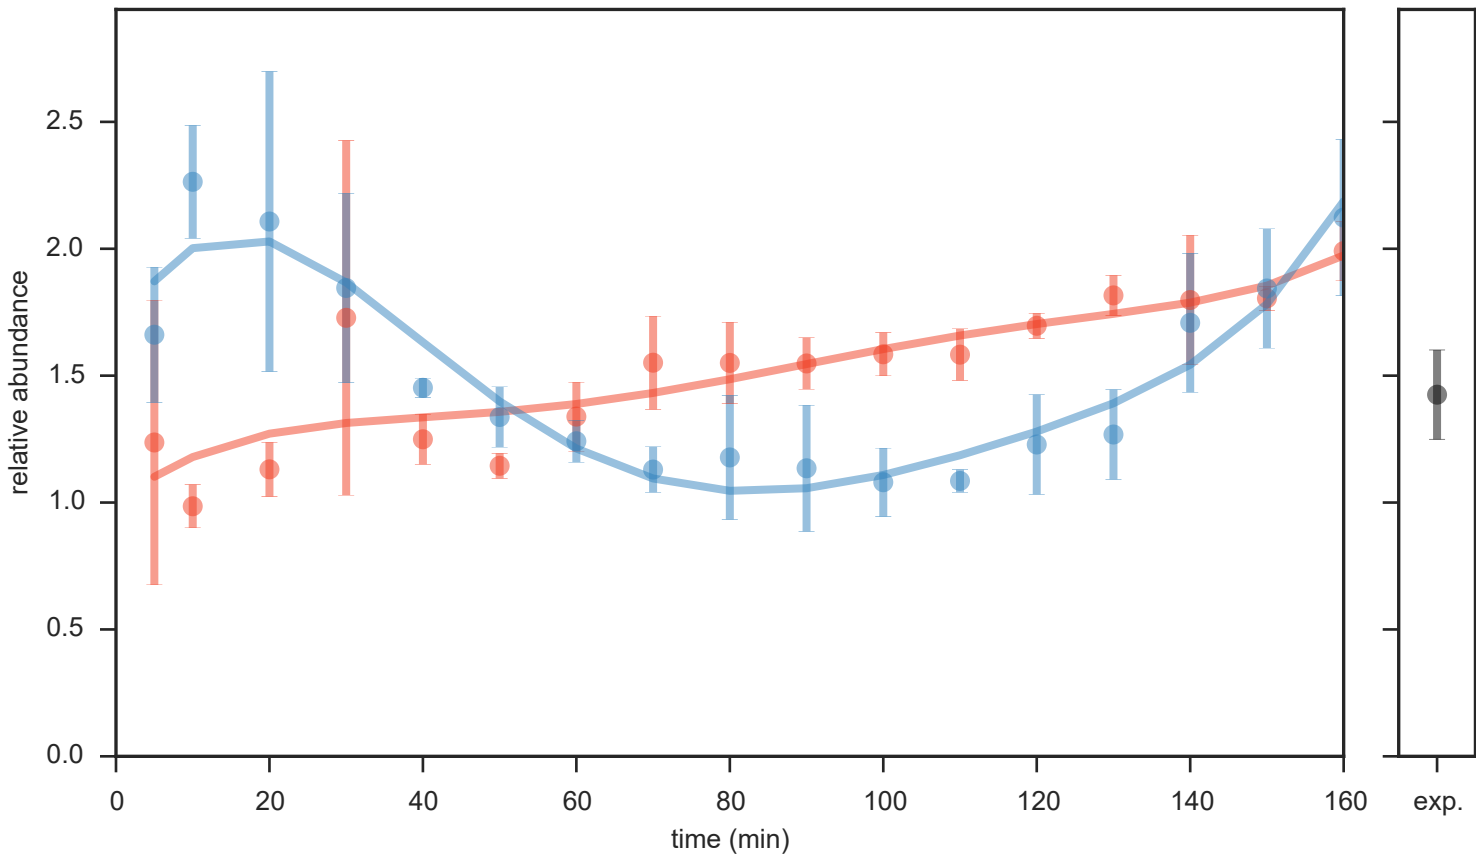

idms\_pid21\_mz216.73

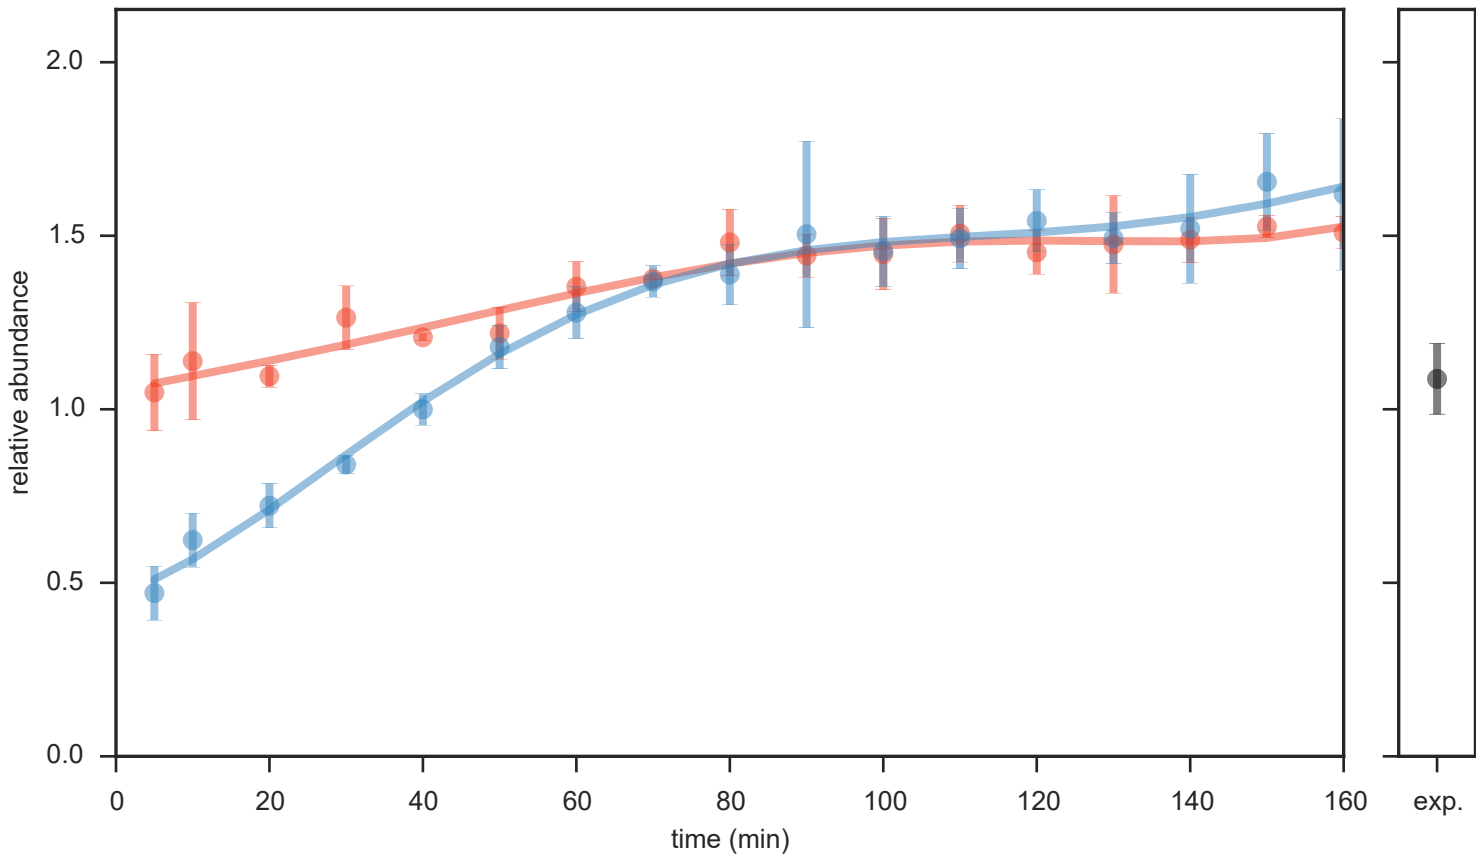

idms\_pid23\_mz322.04

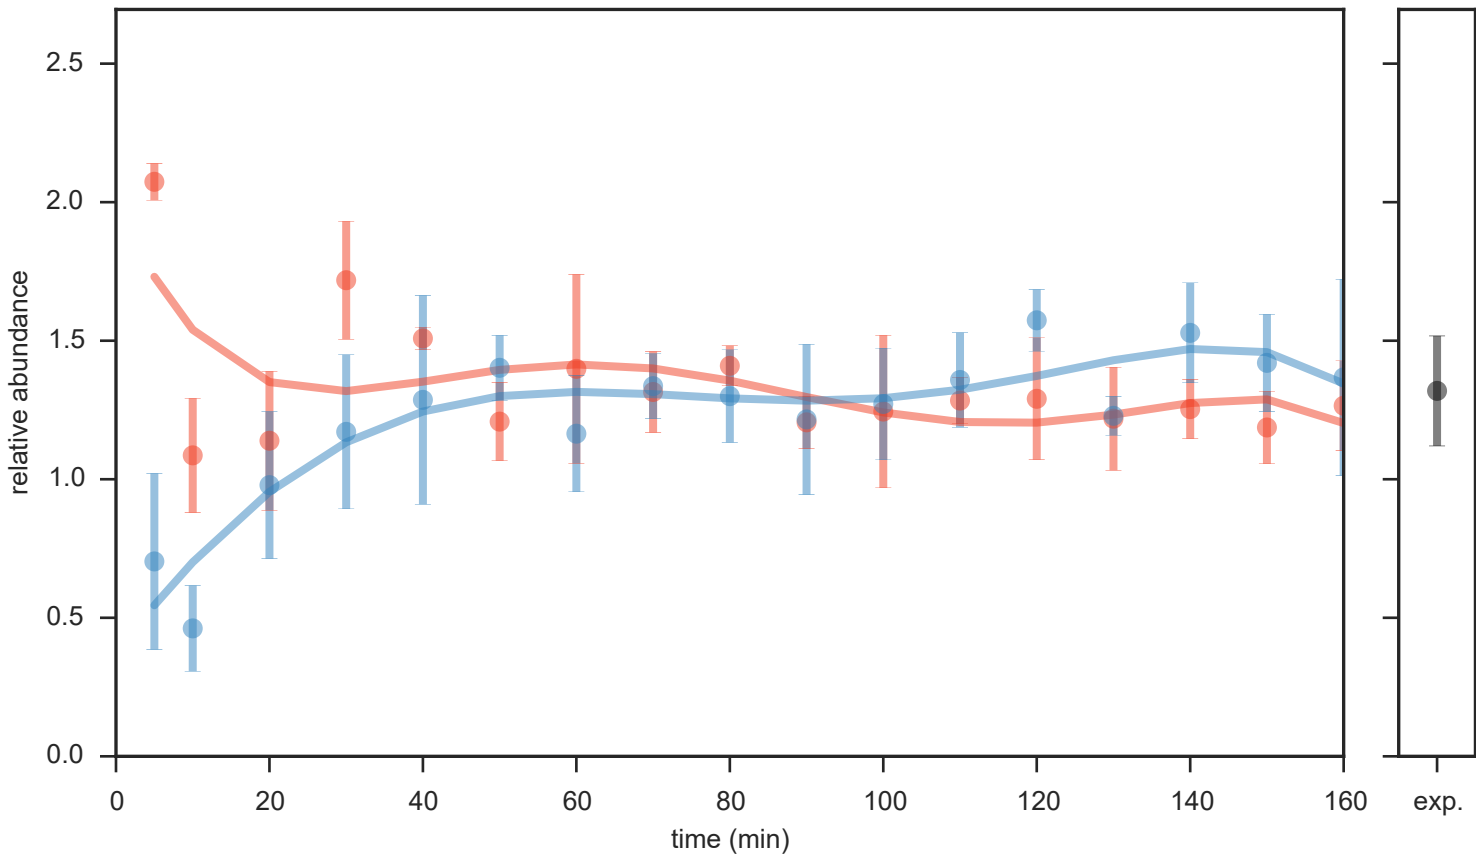



idms\_pid25\_mz248.75

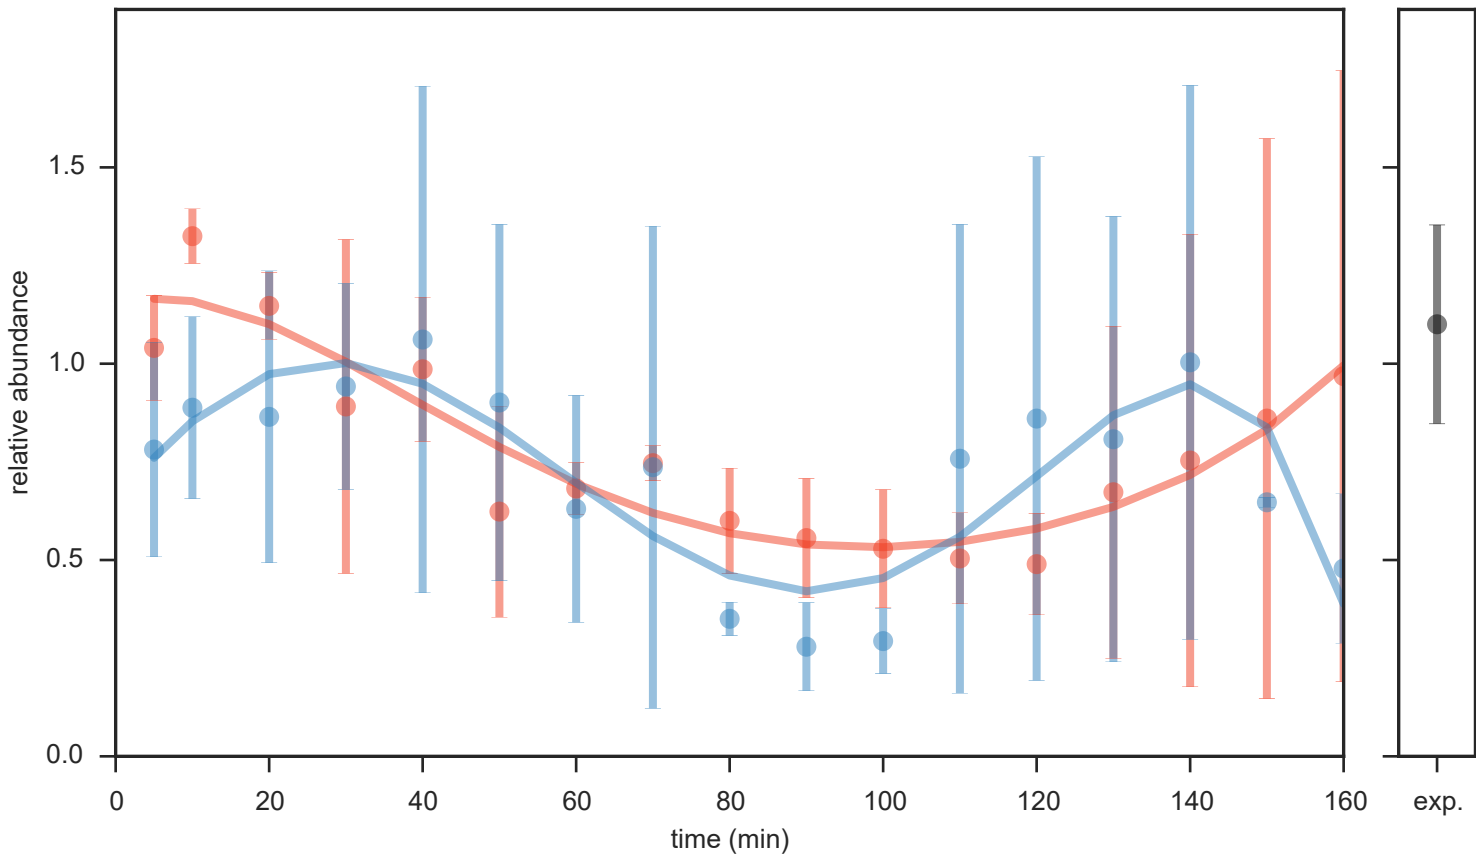

idms\_pid27\_mz286.96

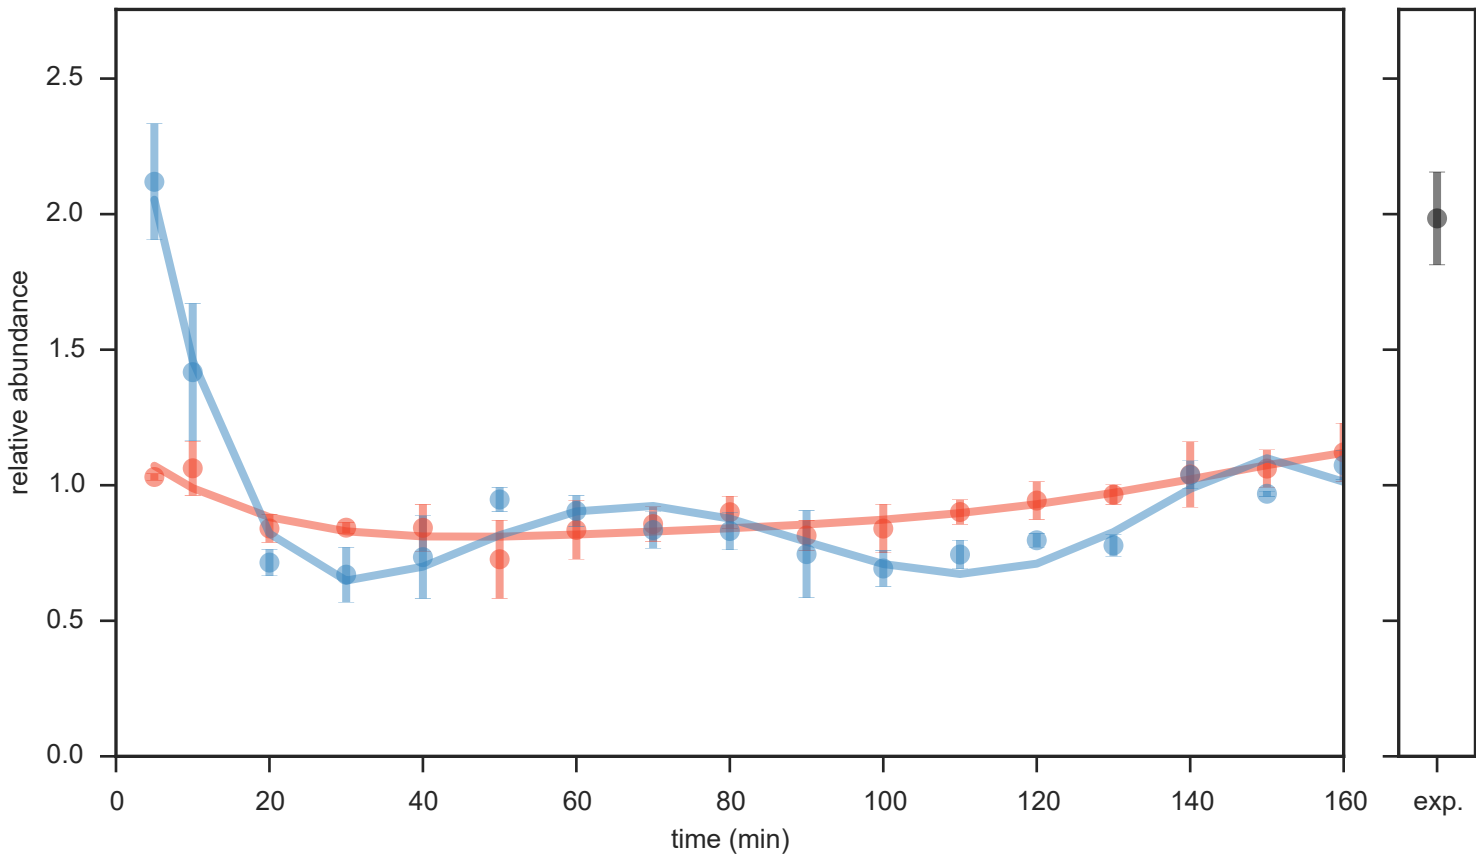

idms\_pid30\_mz266.96

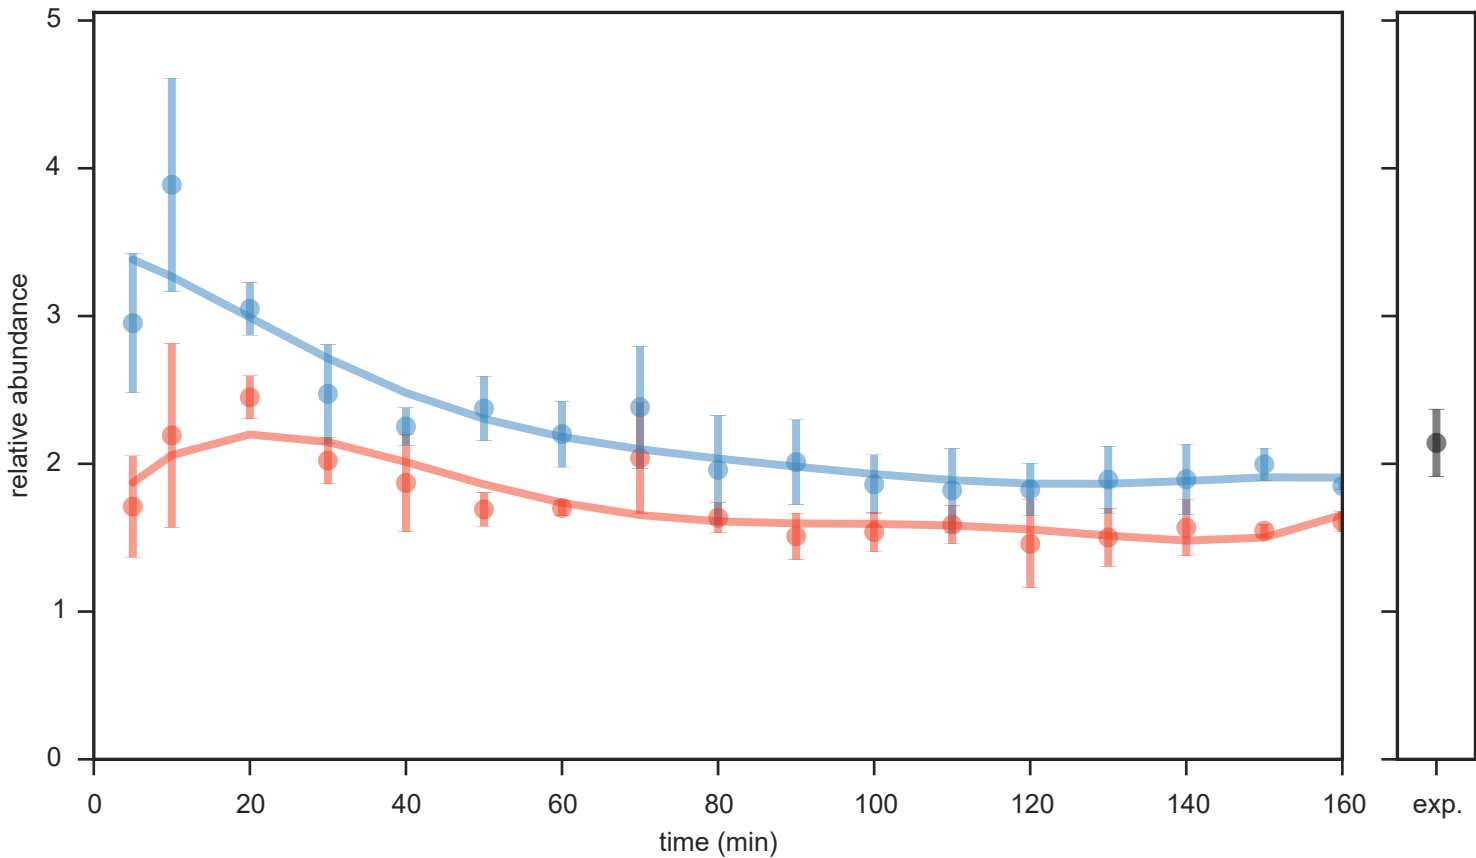

idms\_pid33\_mz313.04

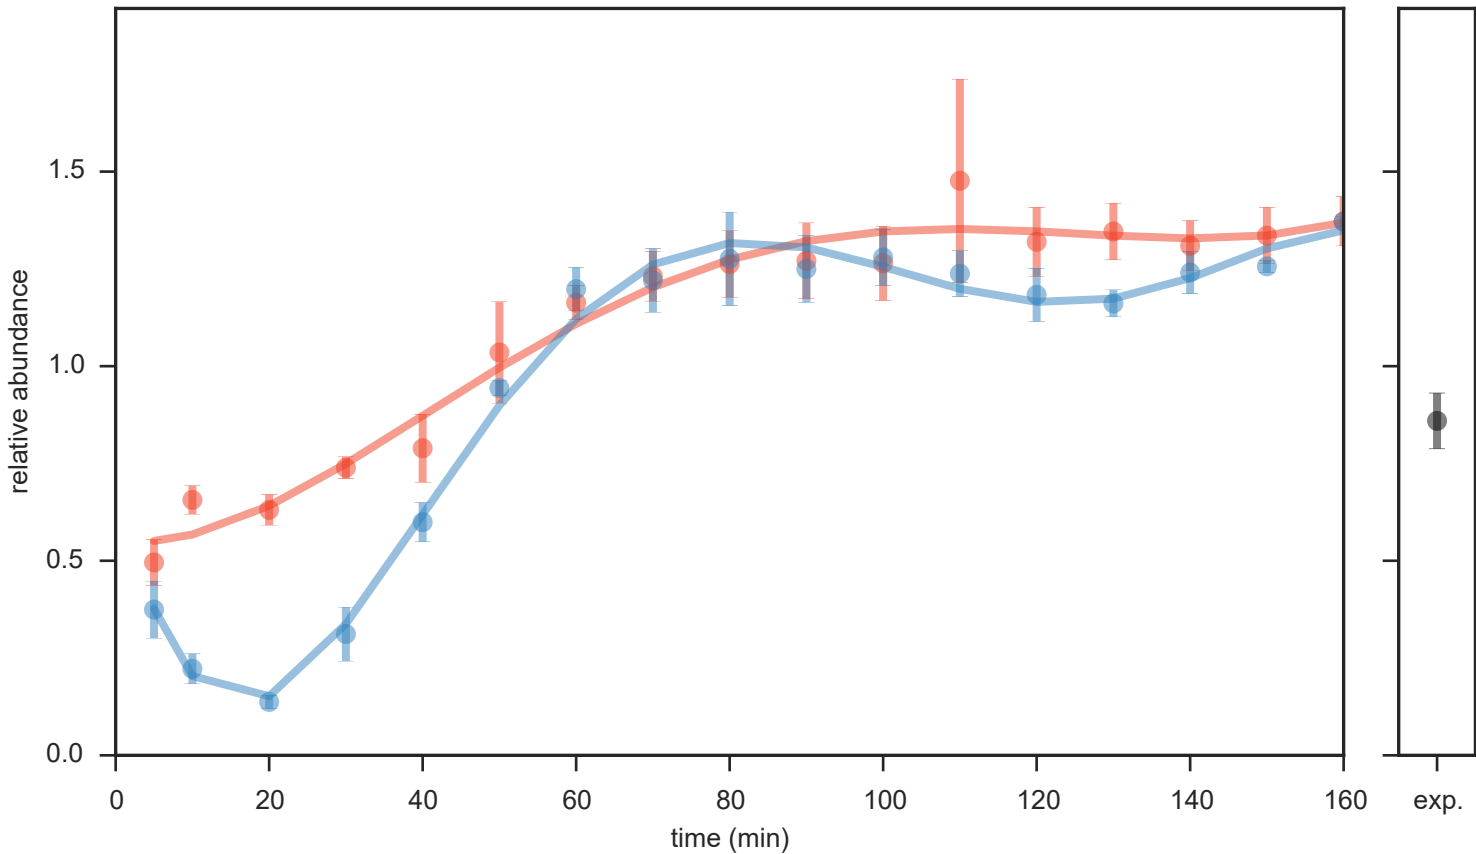

idms\_pid34\_mz573.07

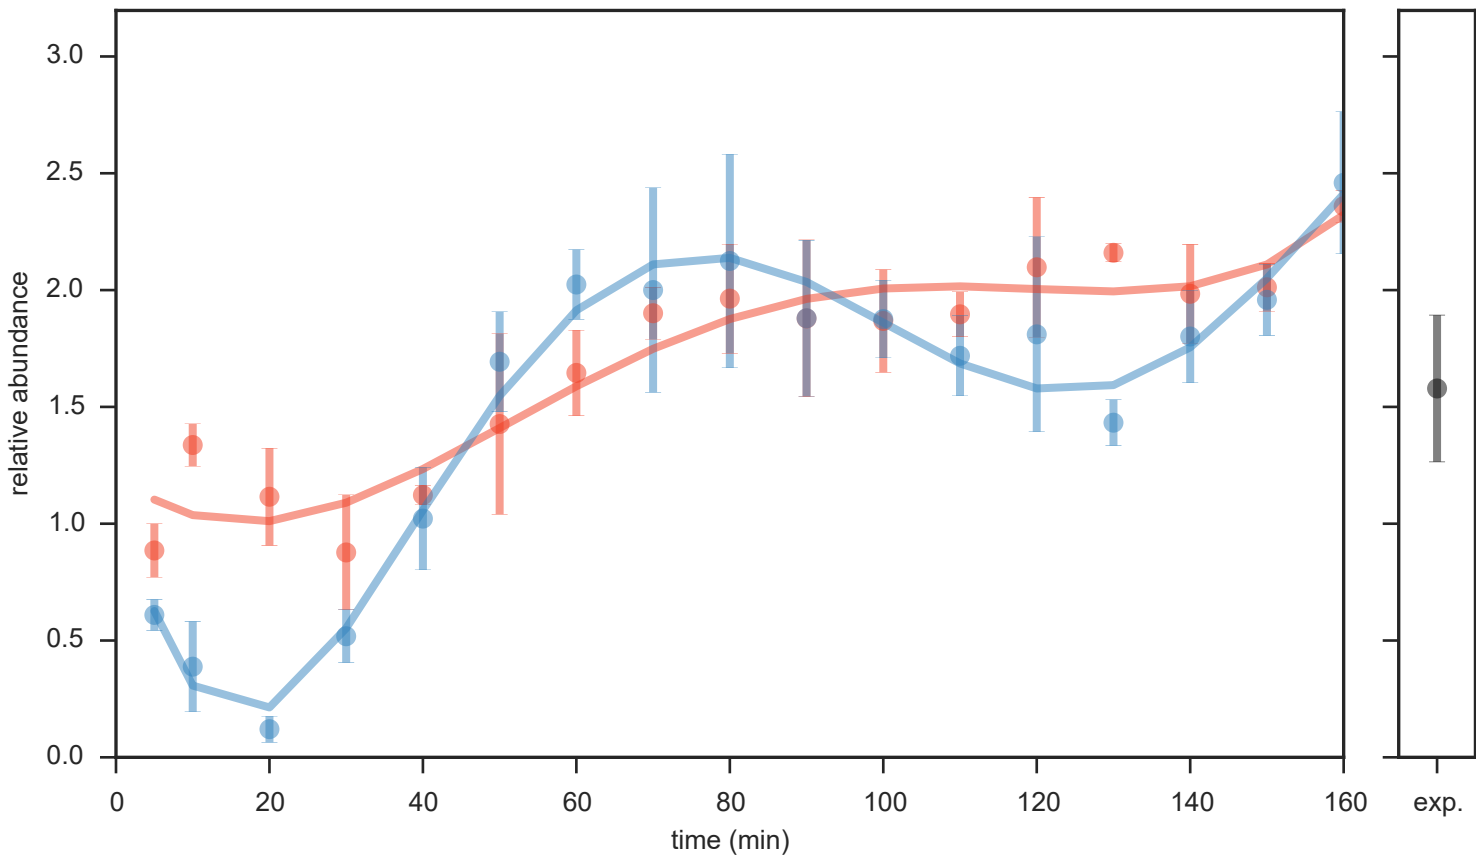

idms\_pid38\_mz265.36

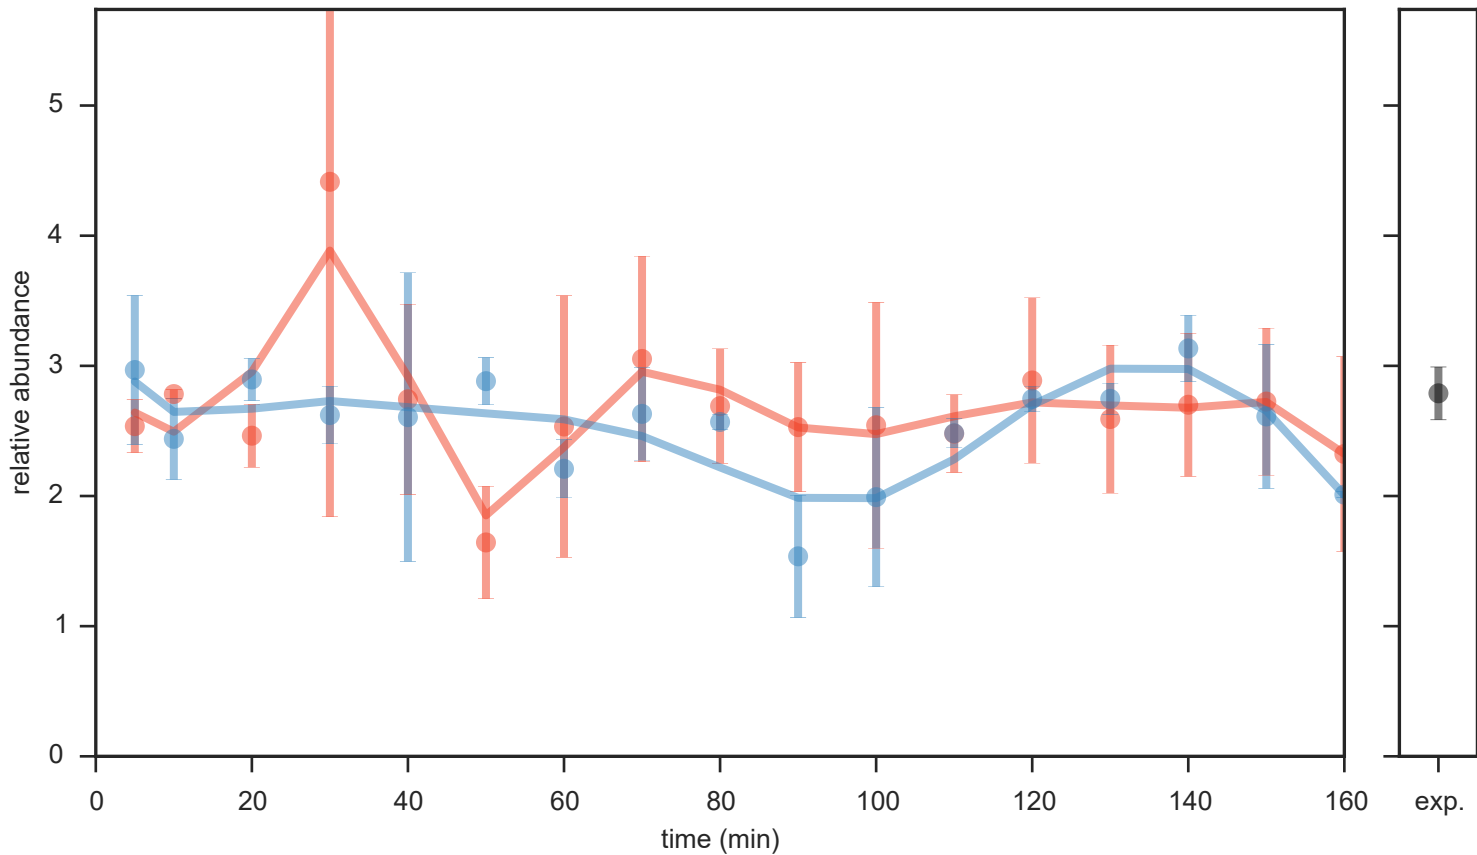

idms\_pid44\_mz337.05

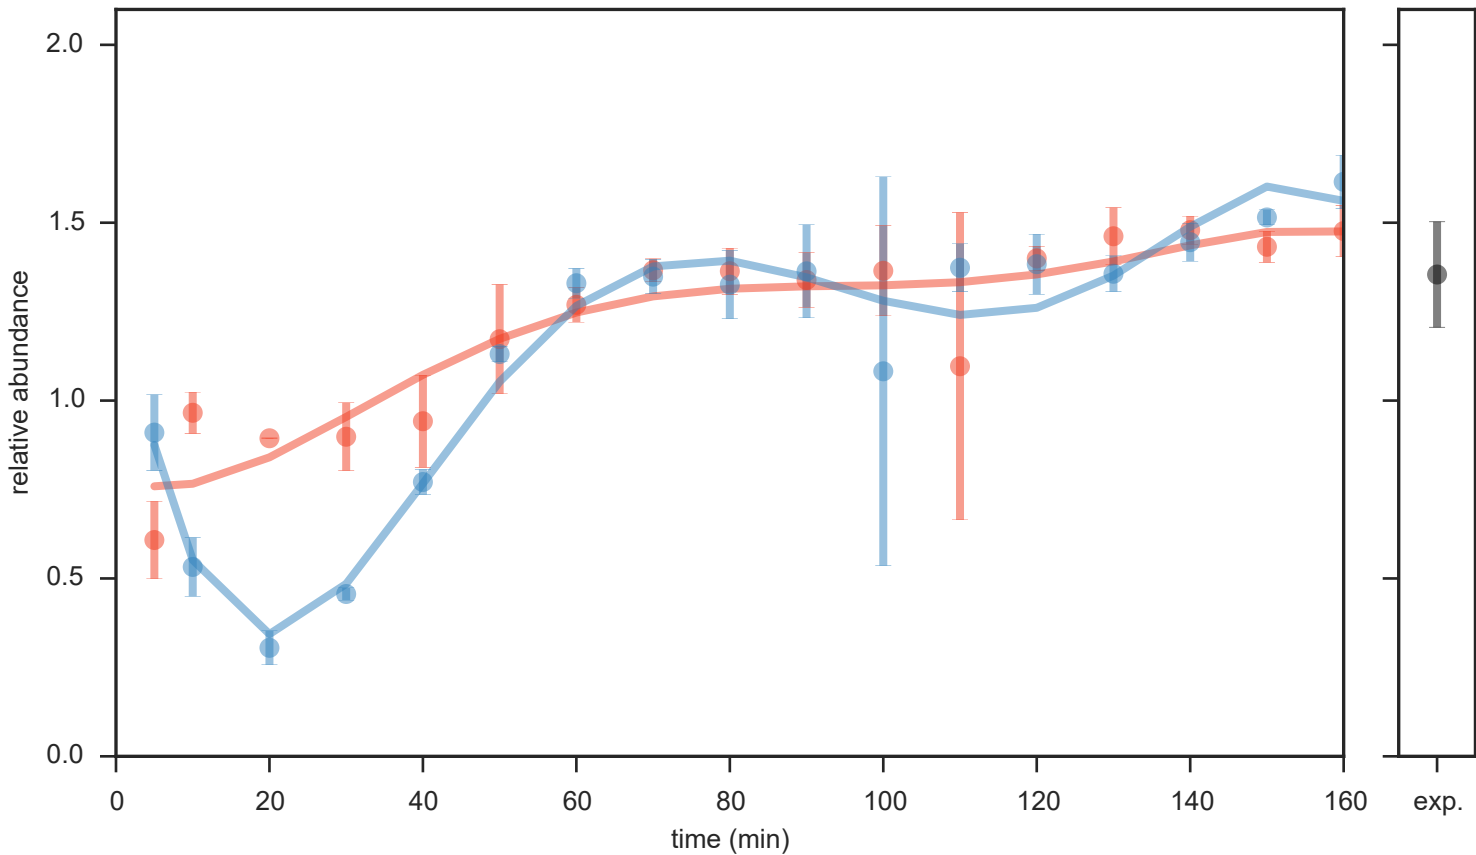

idms\_pid45\_mz349.05

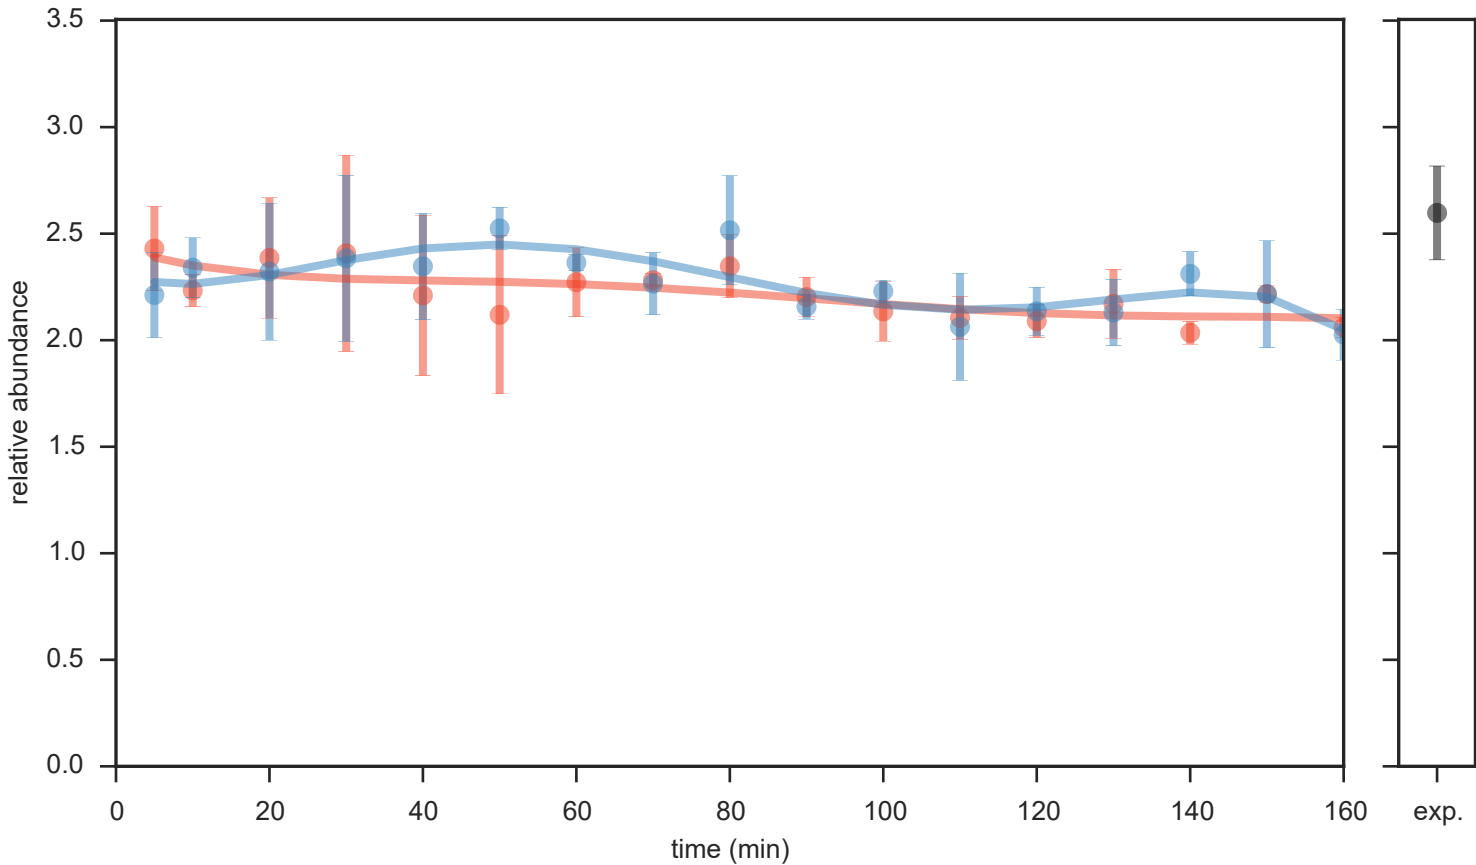



idms\_pid48\_mz382.09

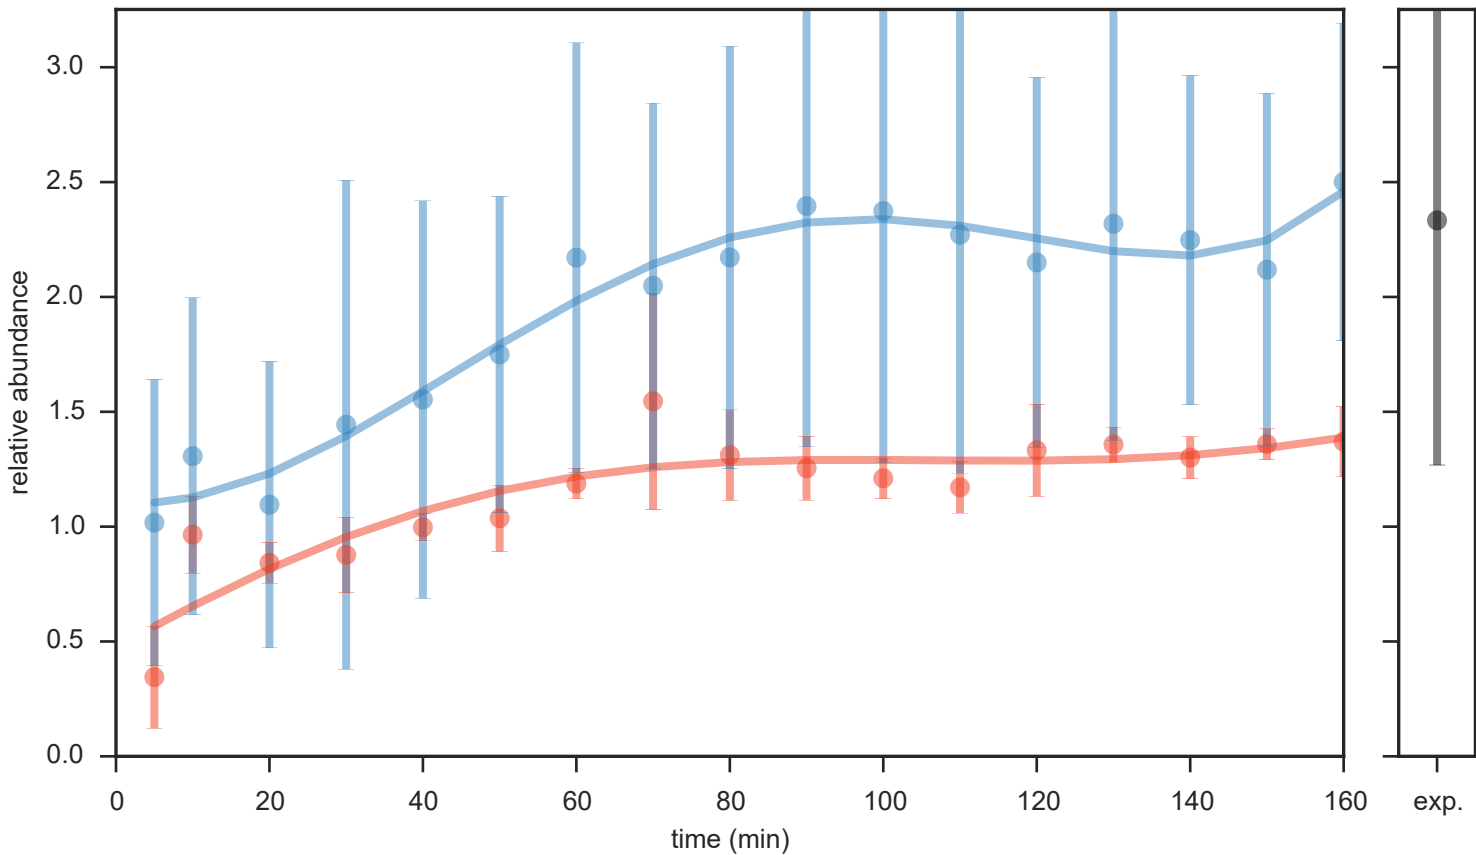

idms\_pid49\_mz314.04

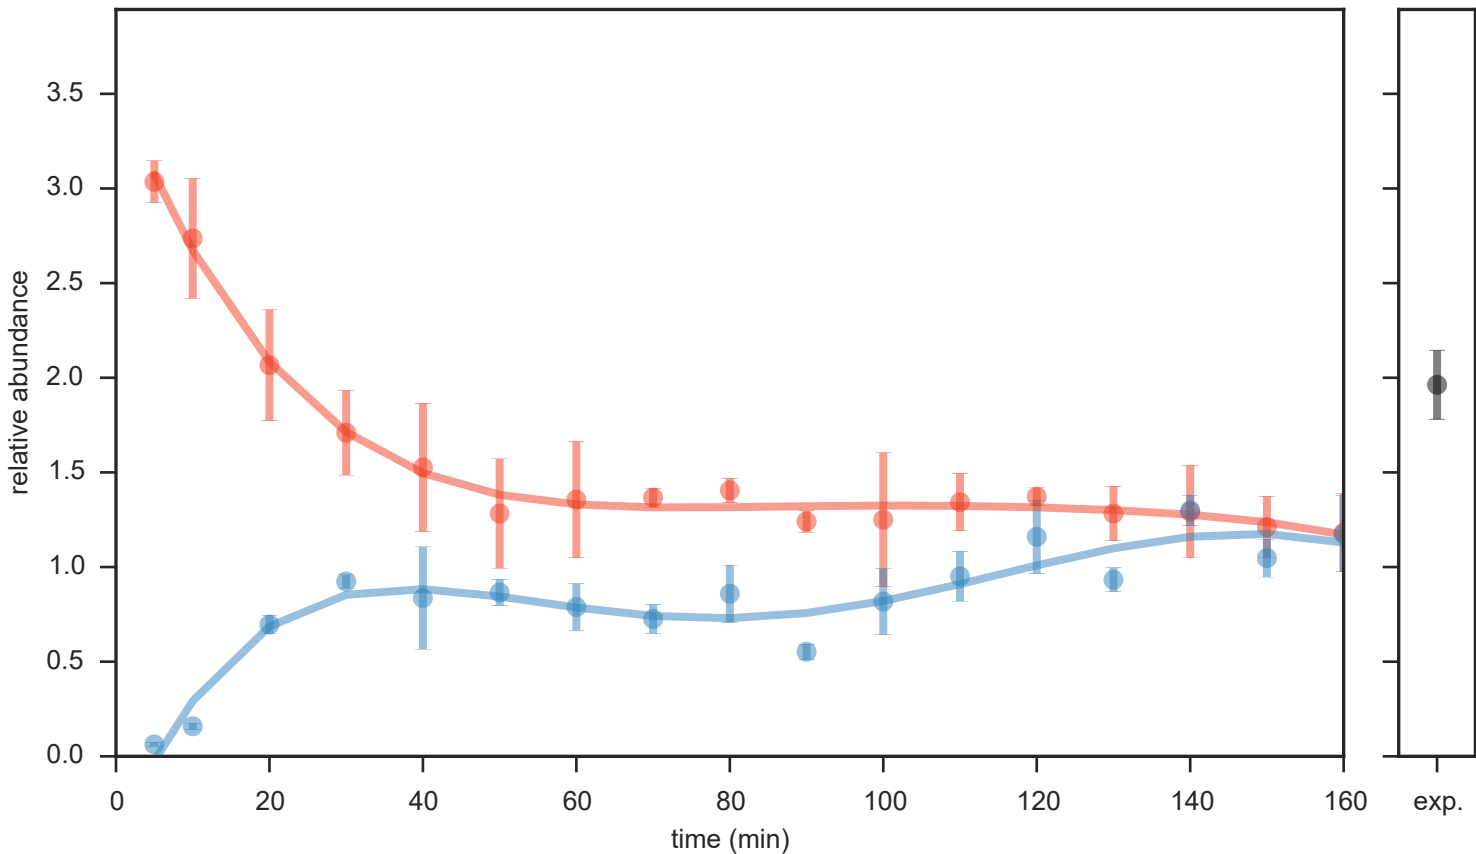

idms\_pid51\_mz177.02

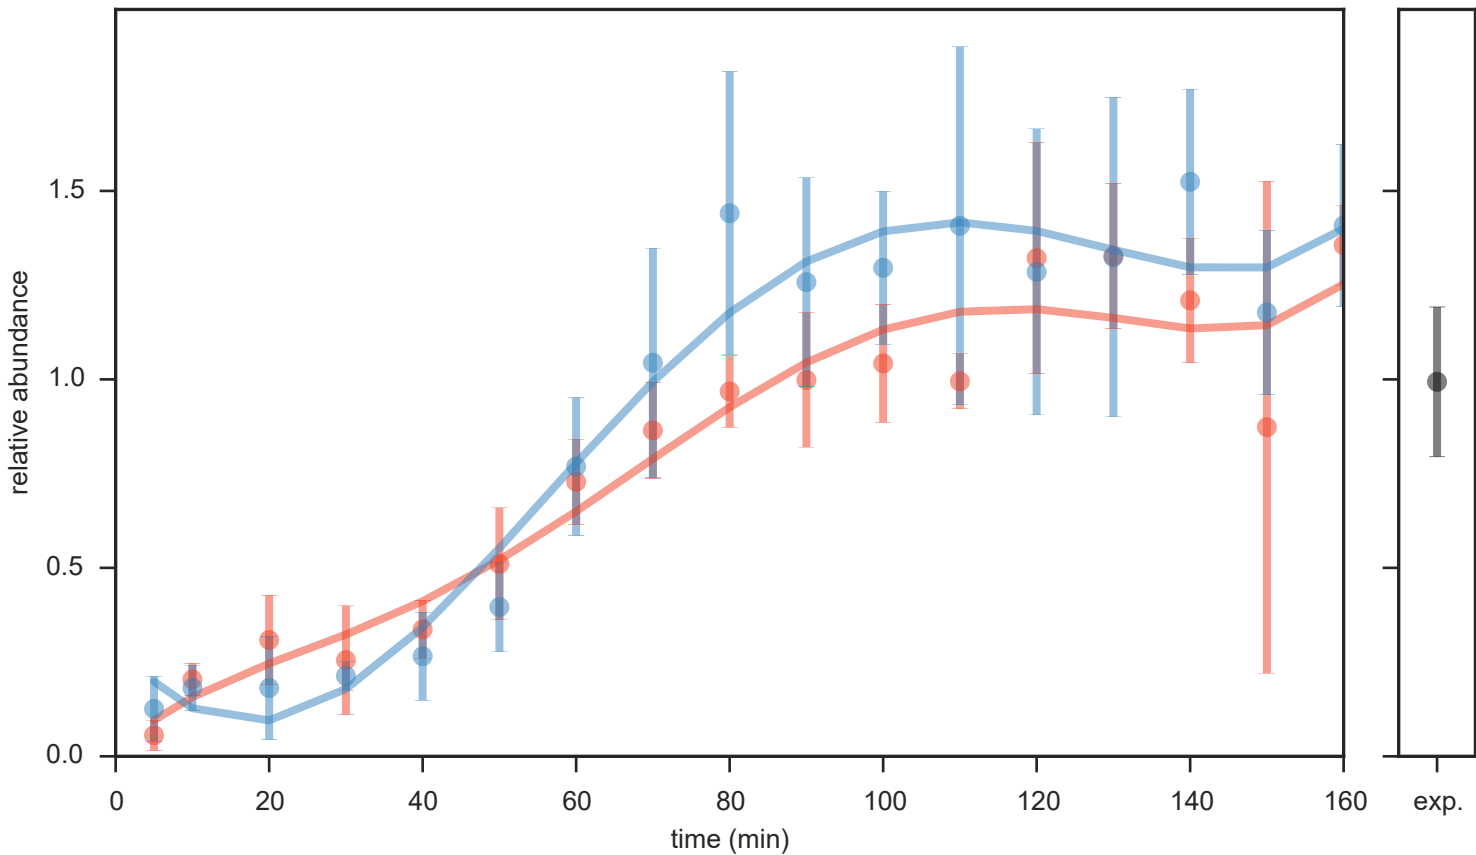

exp.

idms\_pid55\_mz229.01

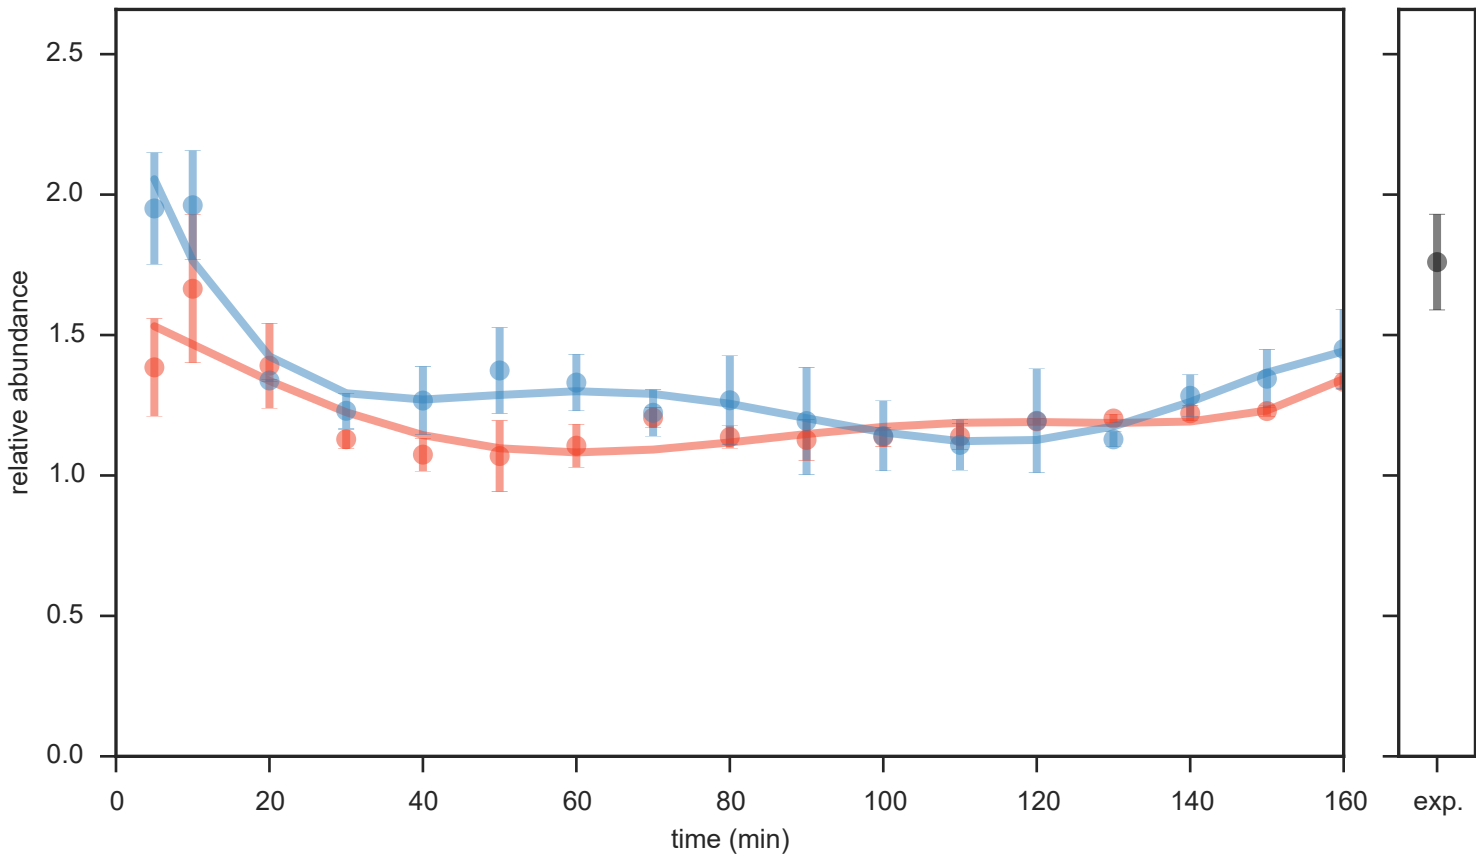

idms\_pid56\_mz442.64

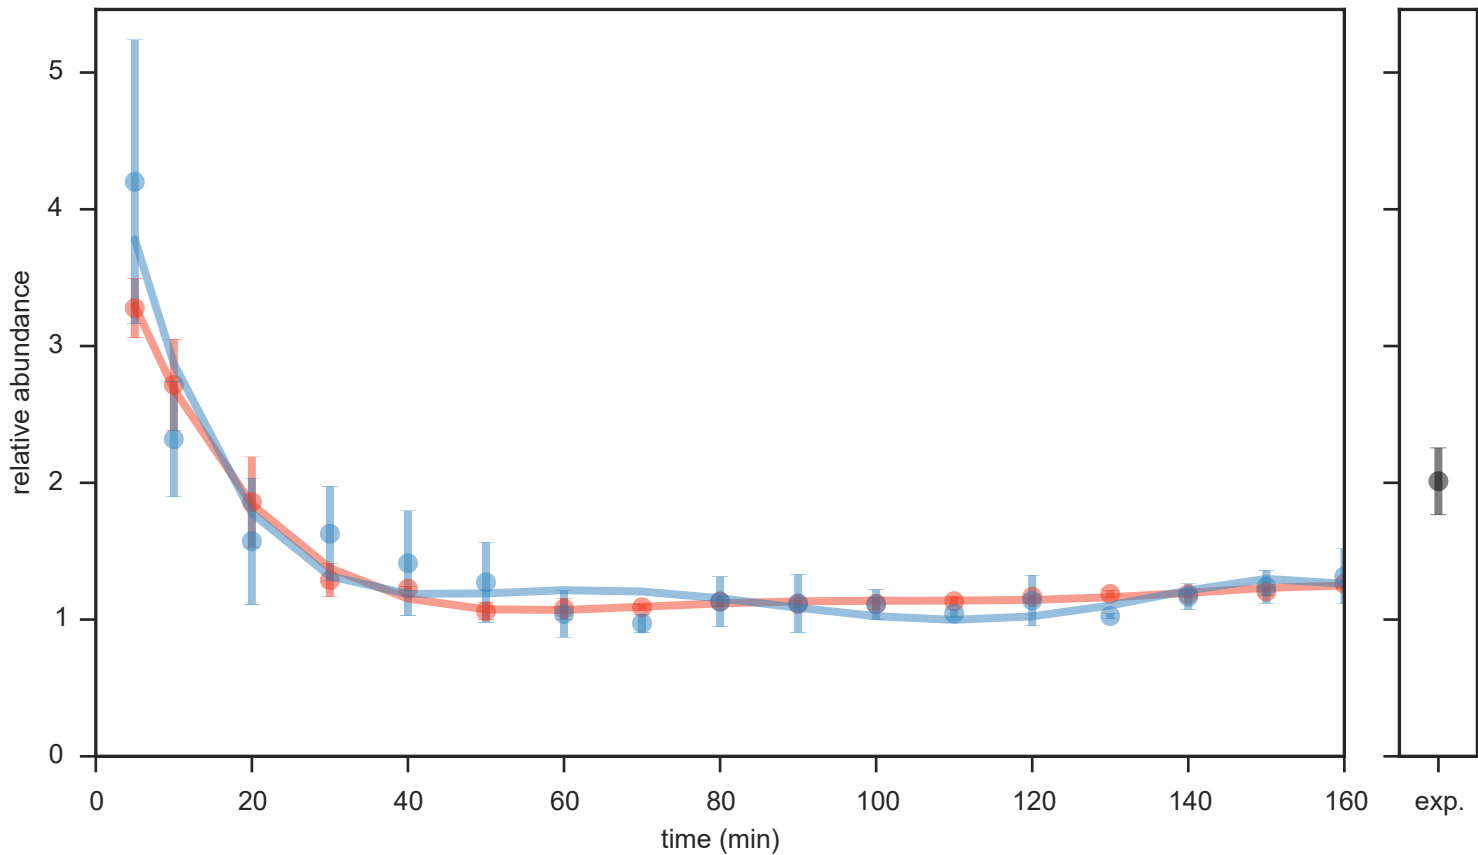

idms\_pid61\_mz421.00

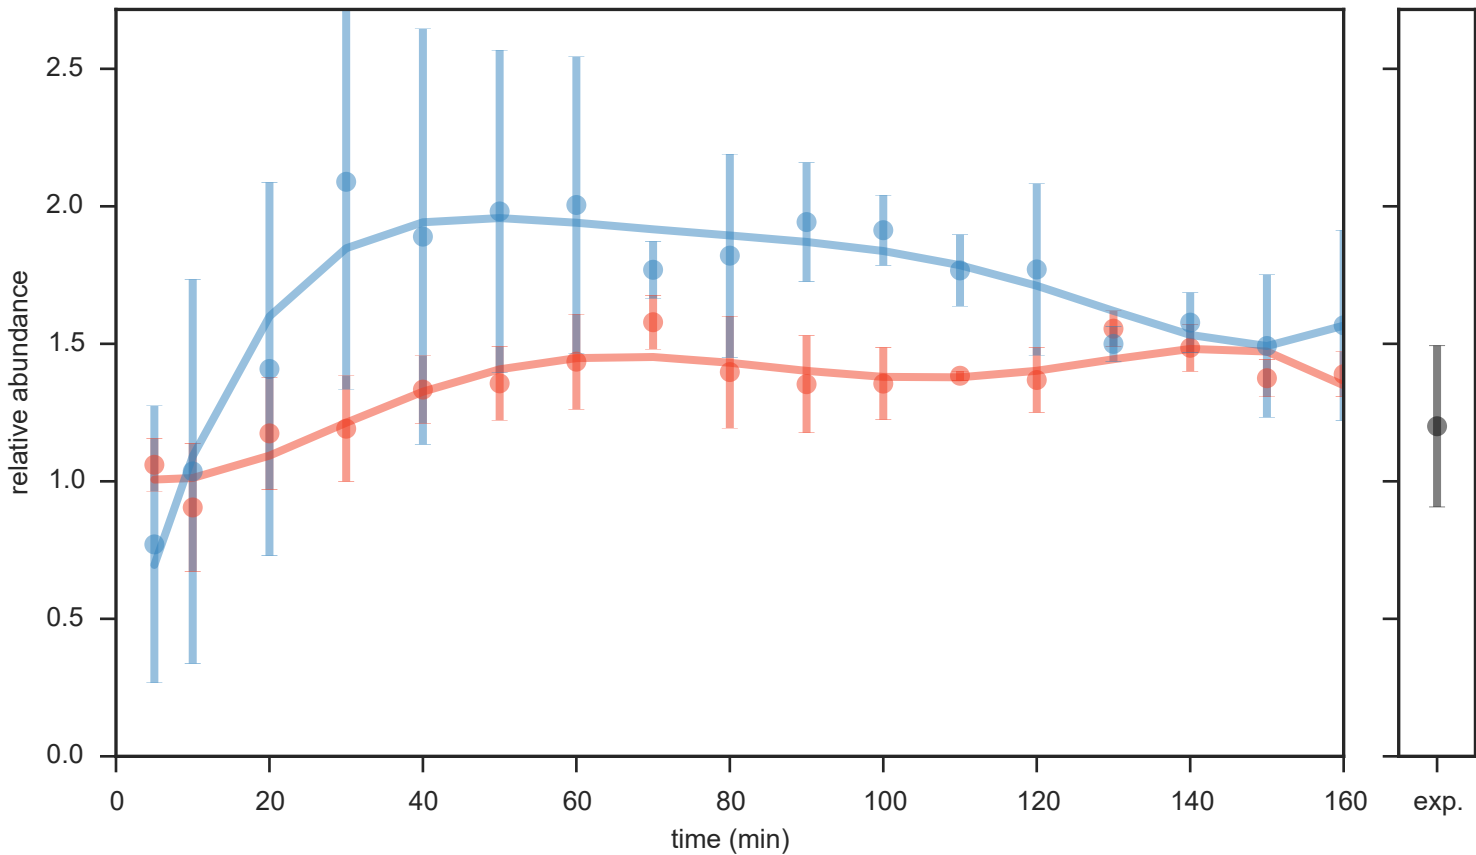

idms\_pid66\_mz541.98

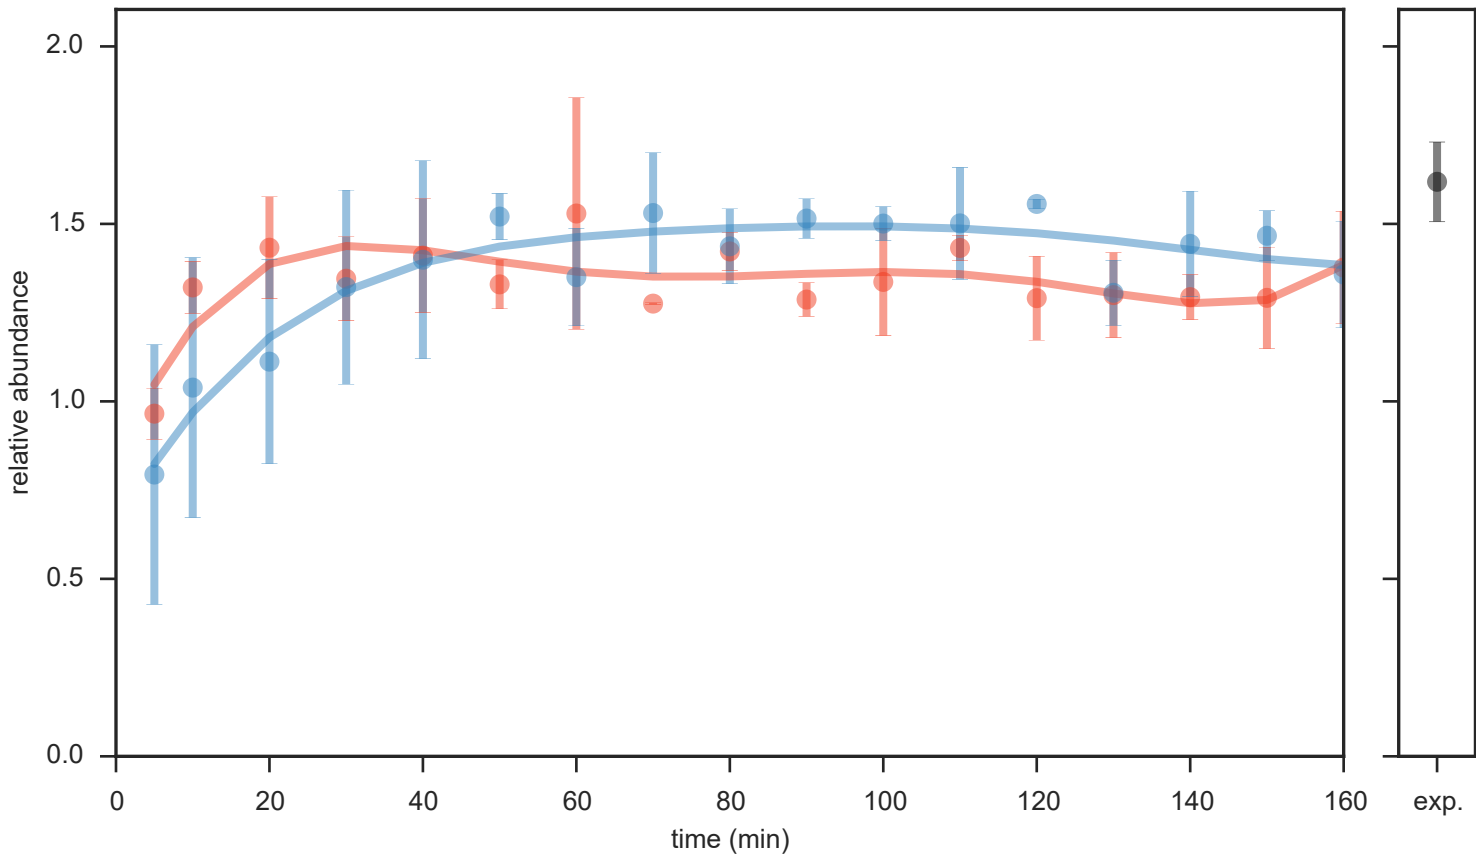

idms\_pid69\_mz184.98

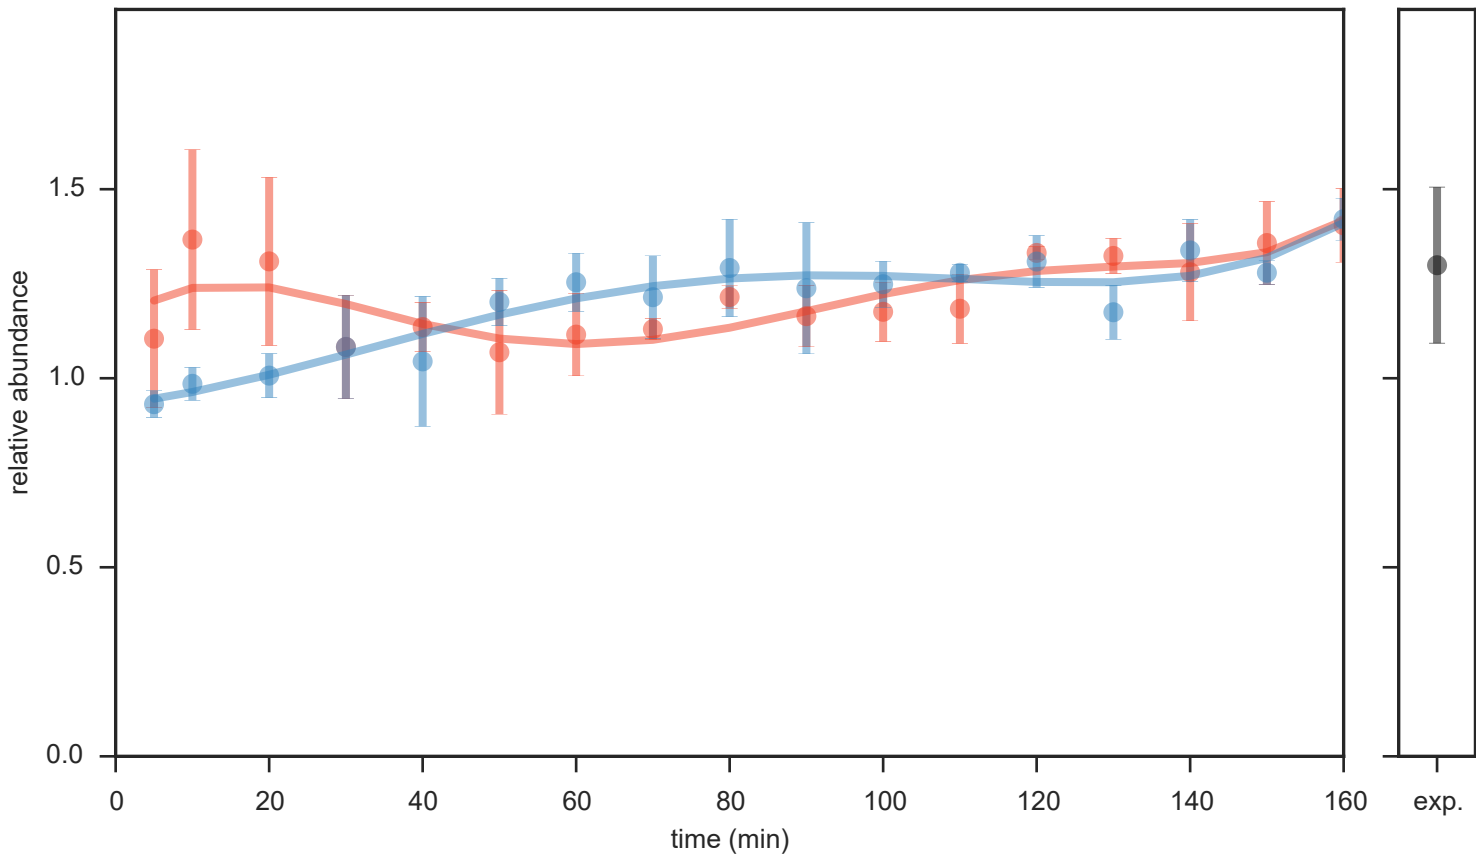



idms\_pid71\_mz296.87

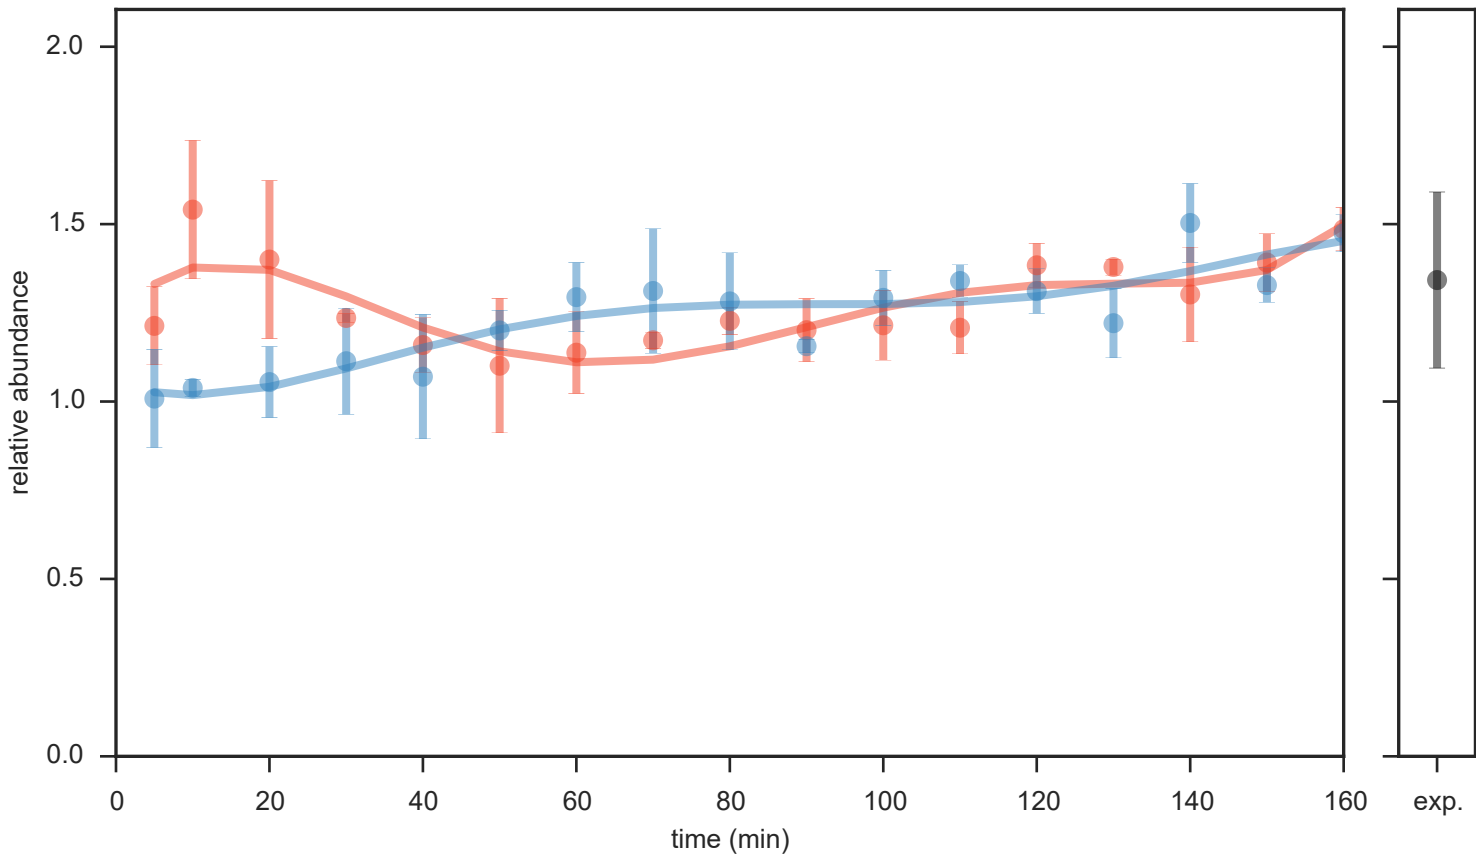

idms\_pid72\_mz185.52

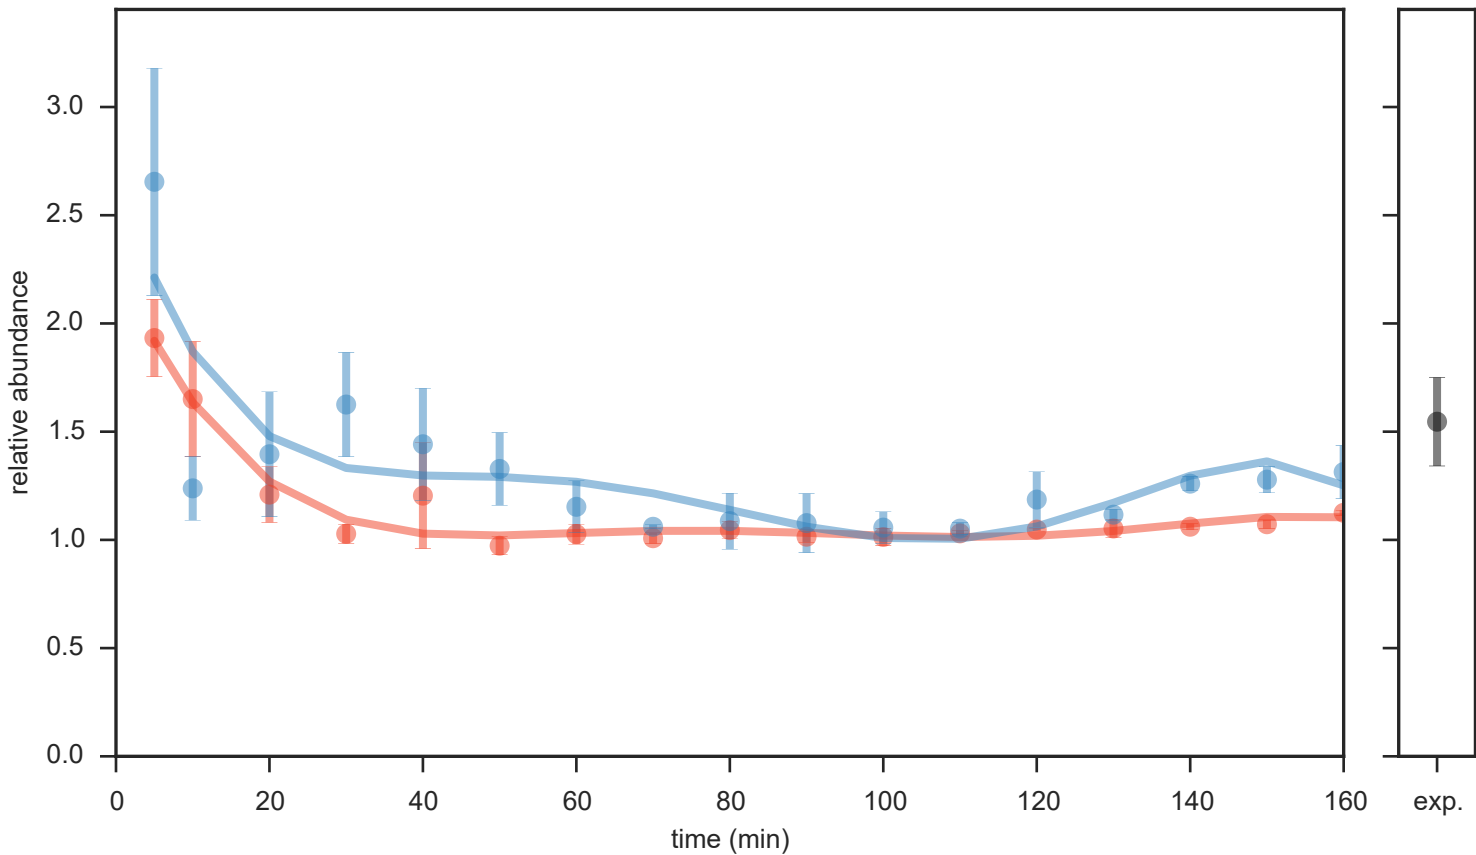

idms\_pid73\_mz264.95

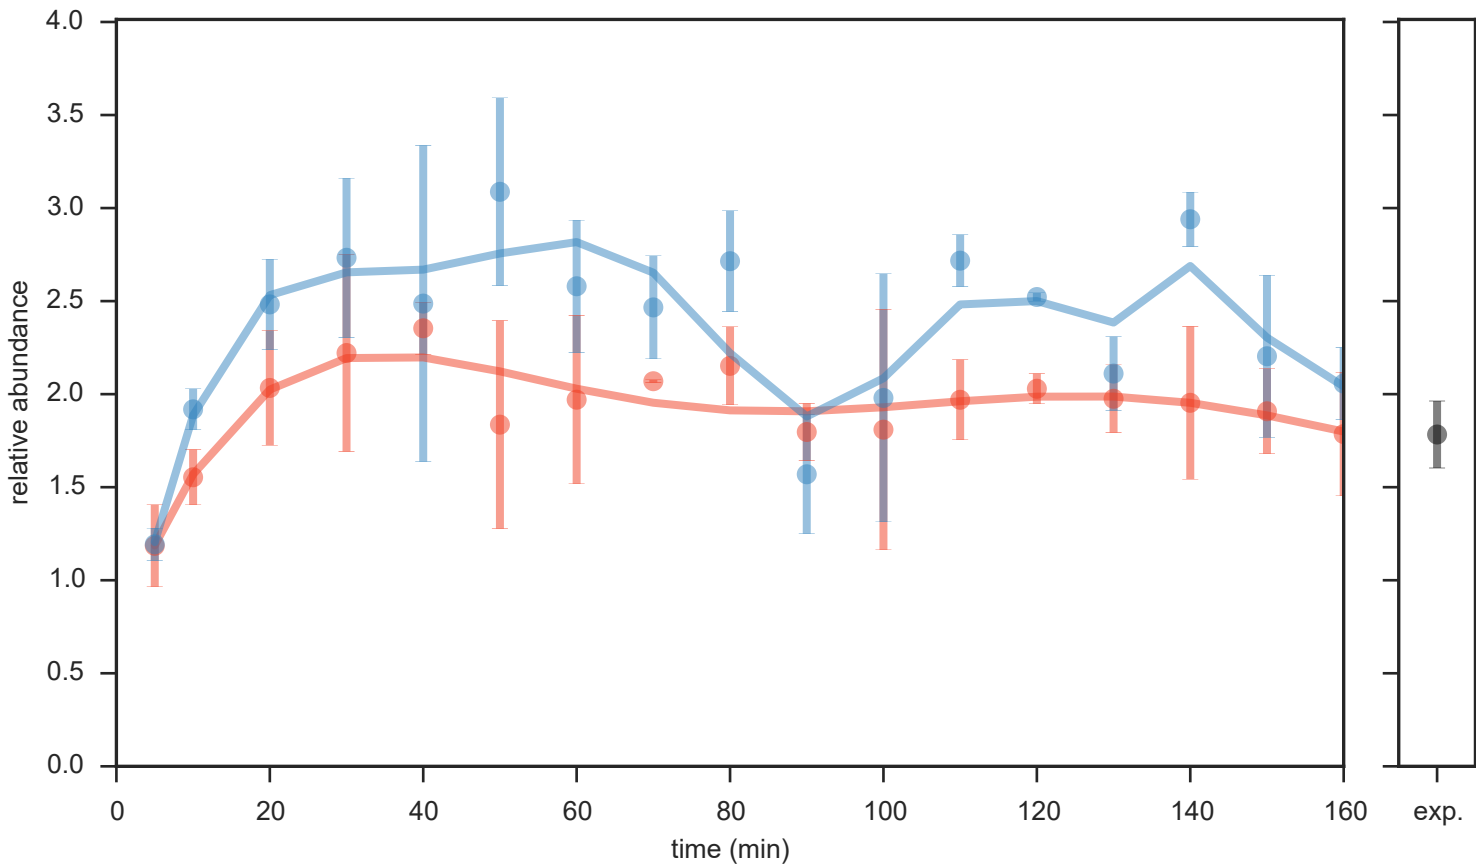

idms\_pid76\_mz253.37

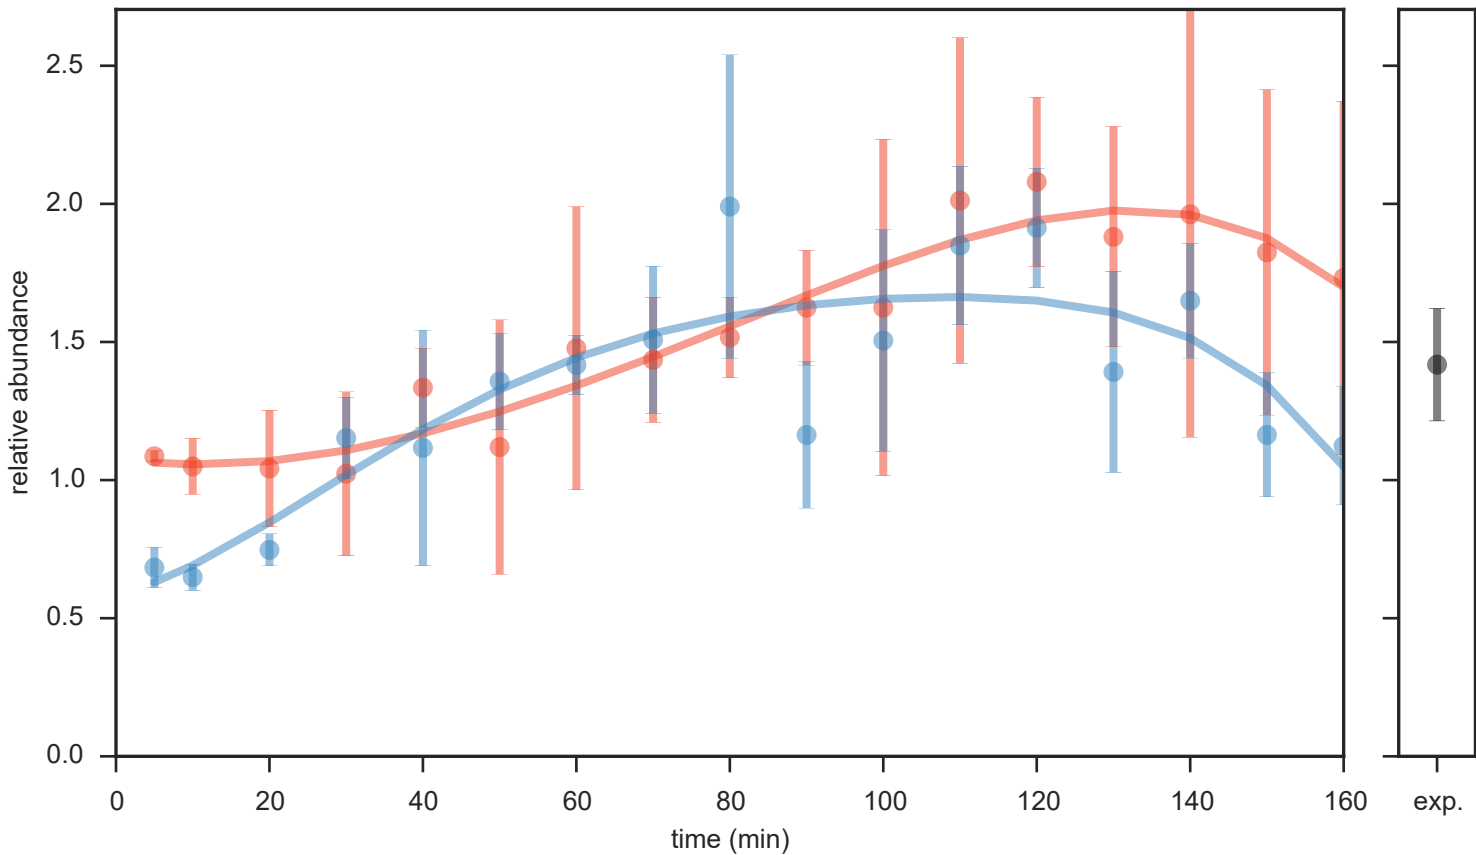

idms\_pid77\_mz284.41

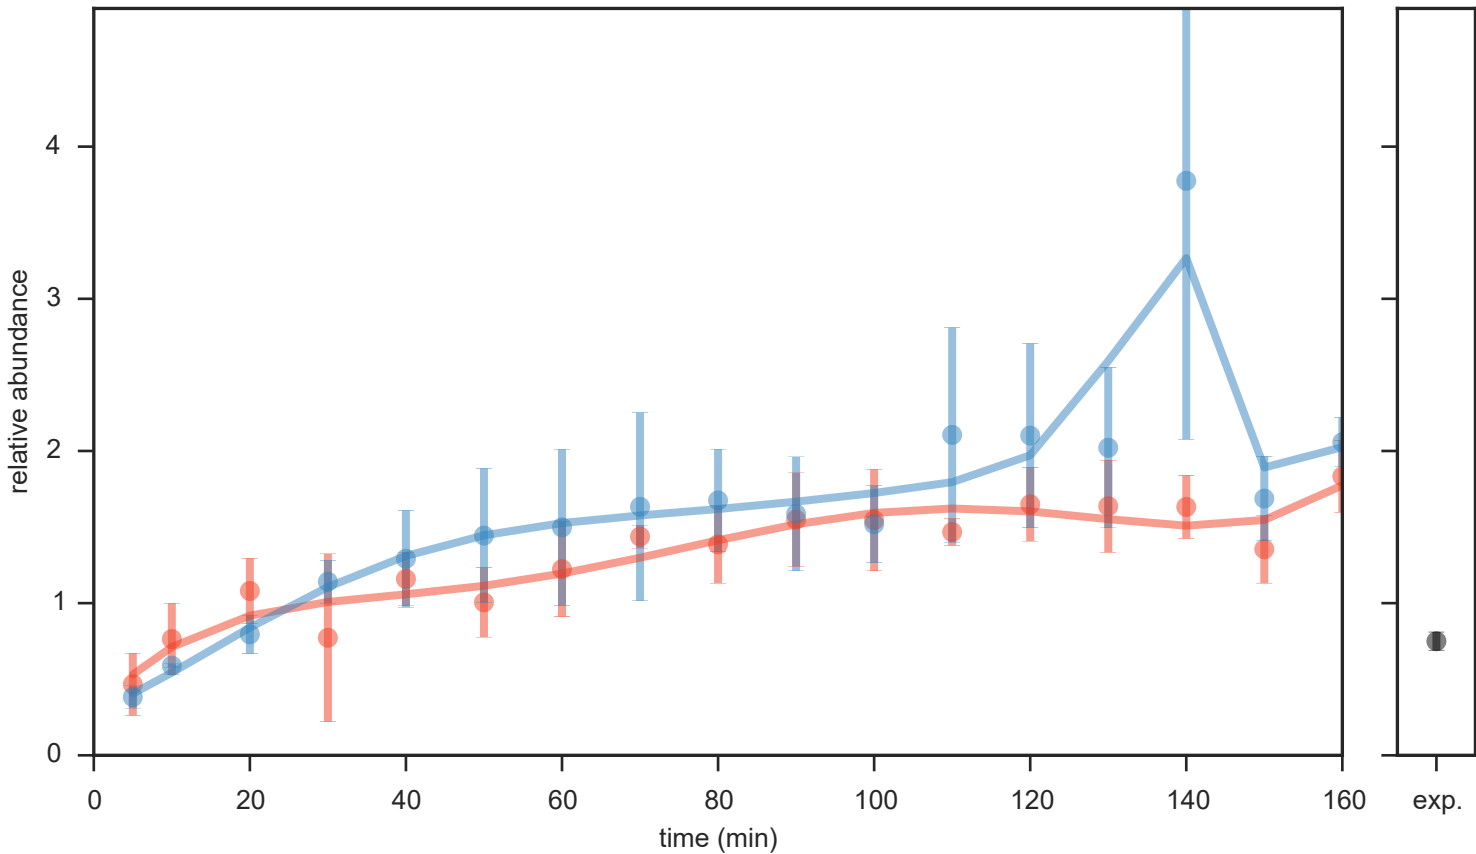

idms\_pid80\_mz198.99

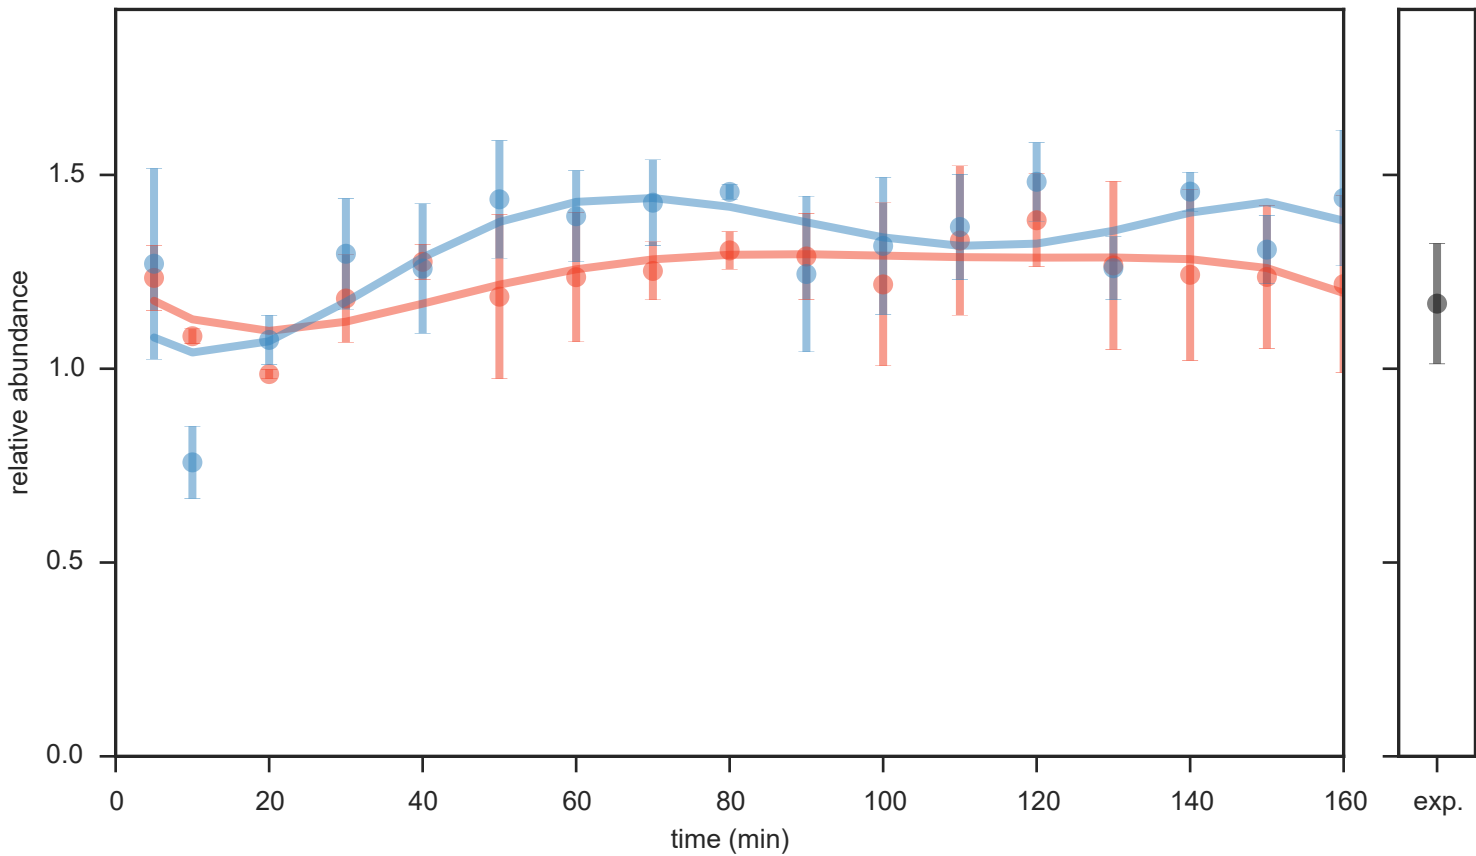

idms\_pid83\_mz244.49

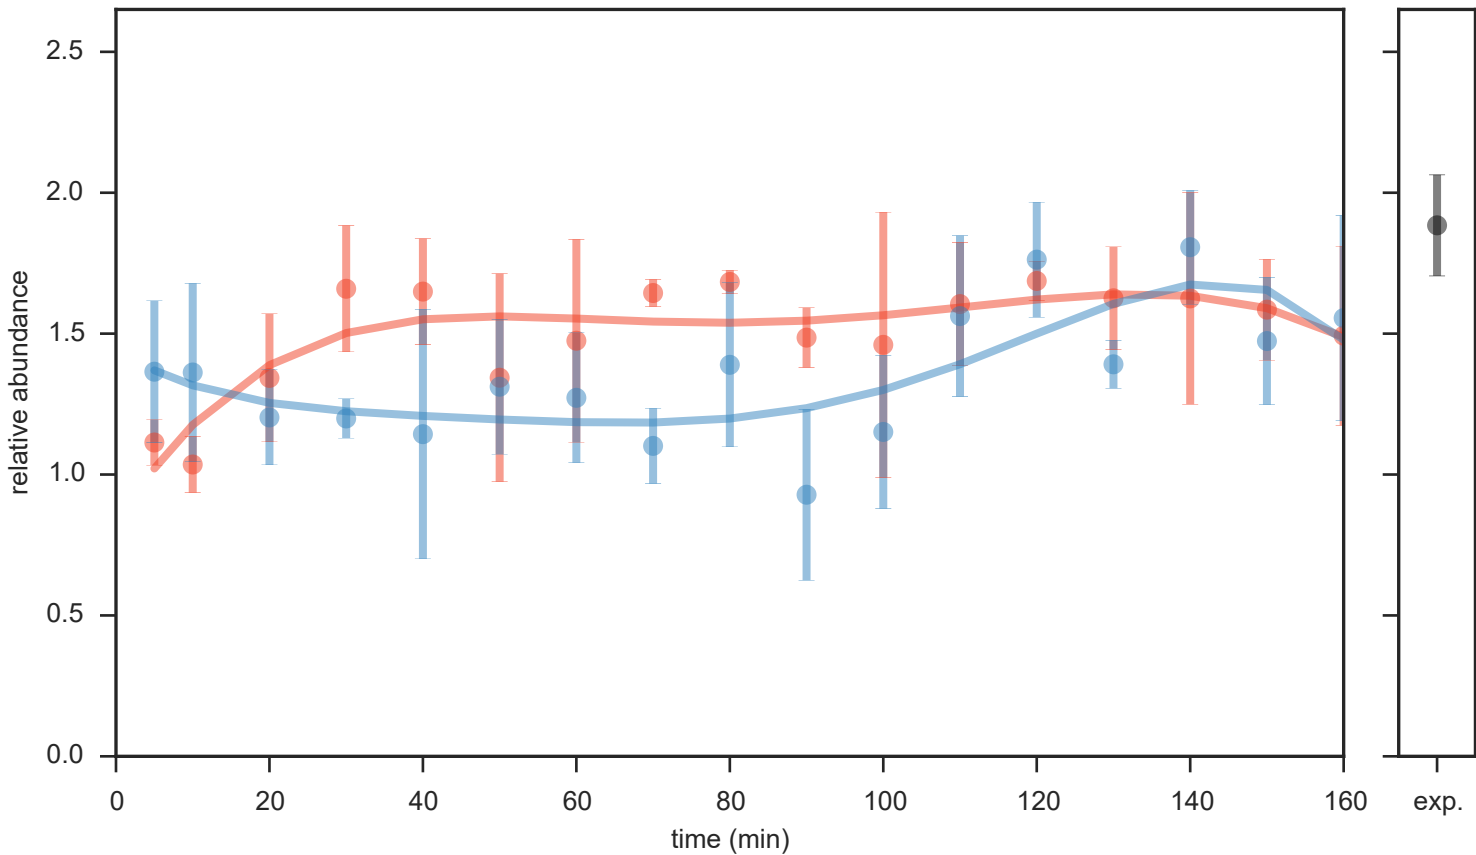

idms\_pid85\_mz371.53

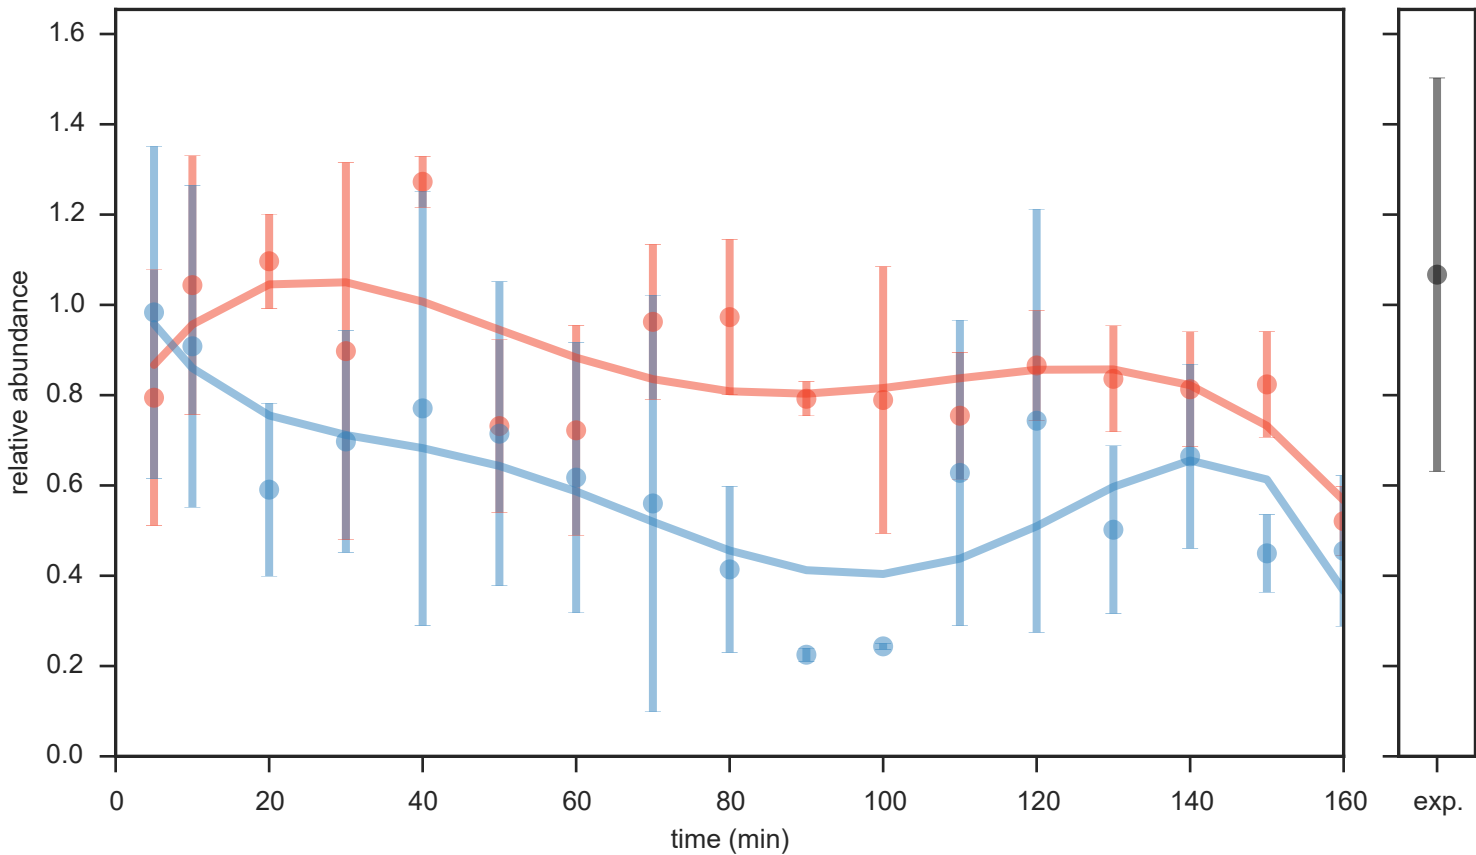



idms\_pid89\_mz242.98

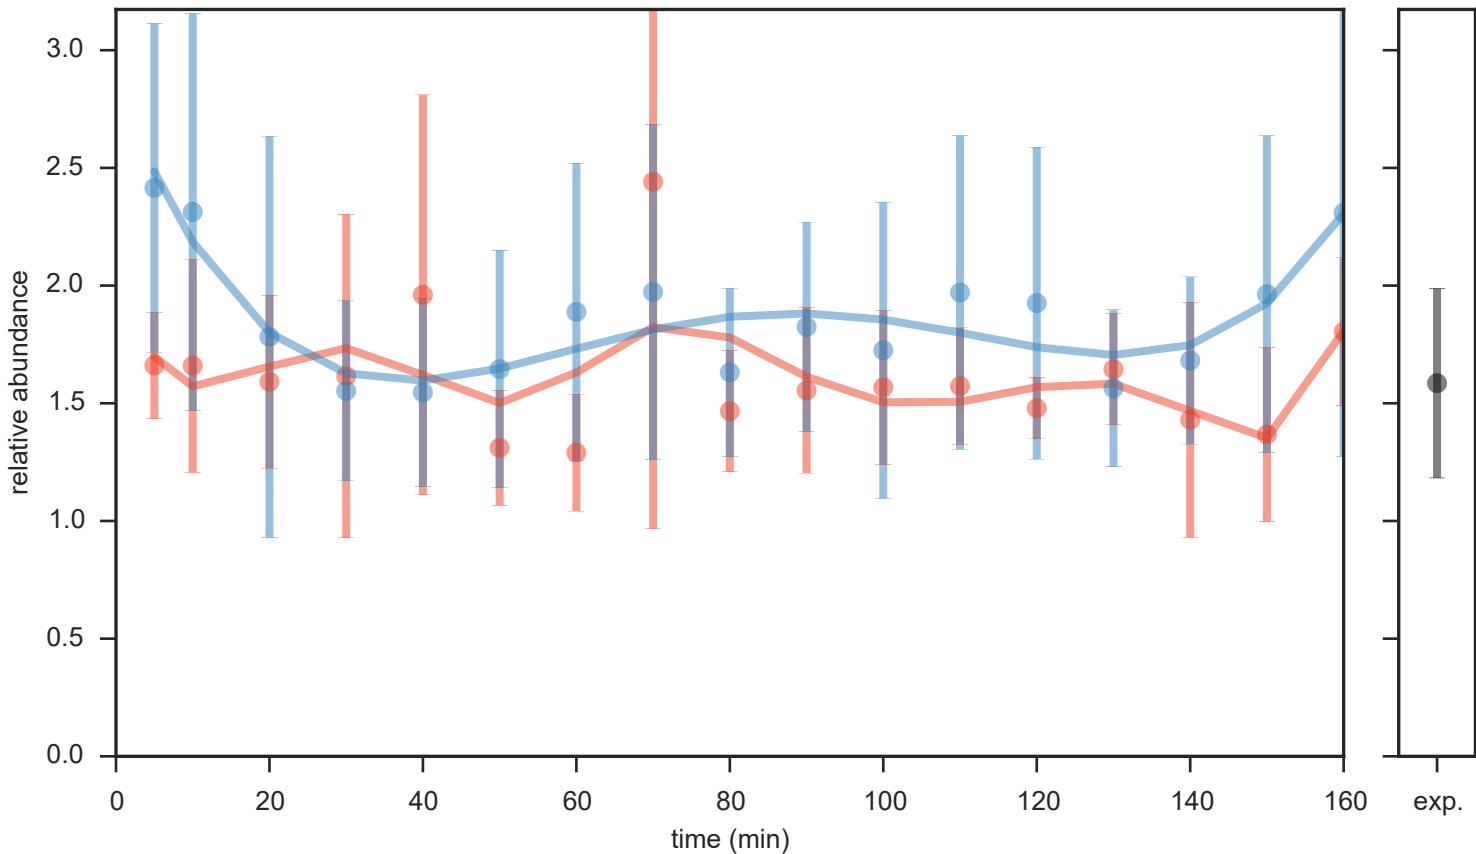

idms\_pid96\_mz374.15

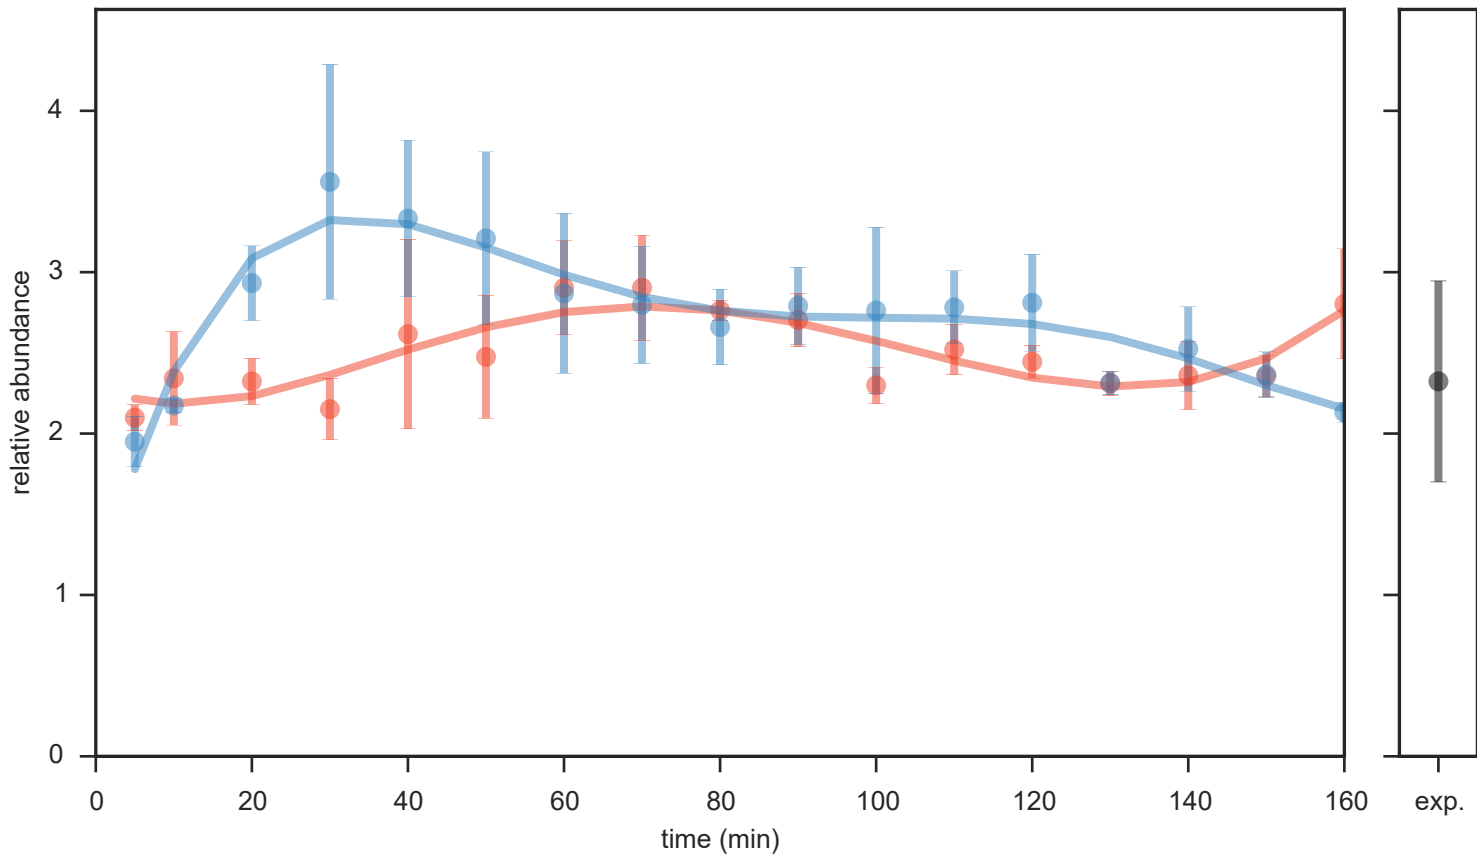

idms\_pid97\_mz281.02

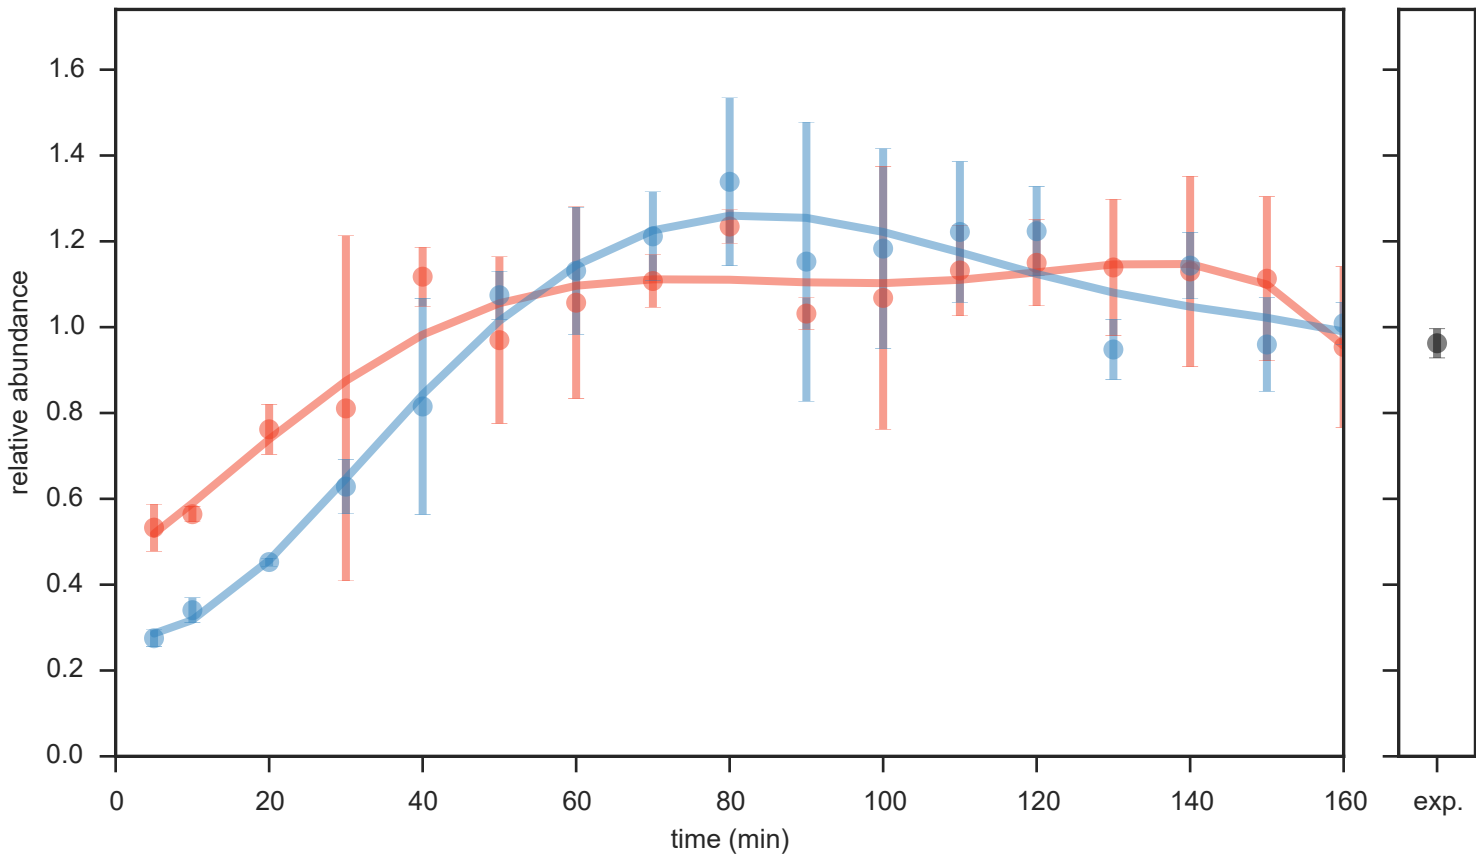

idms\_pid105\_mz175.05

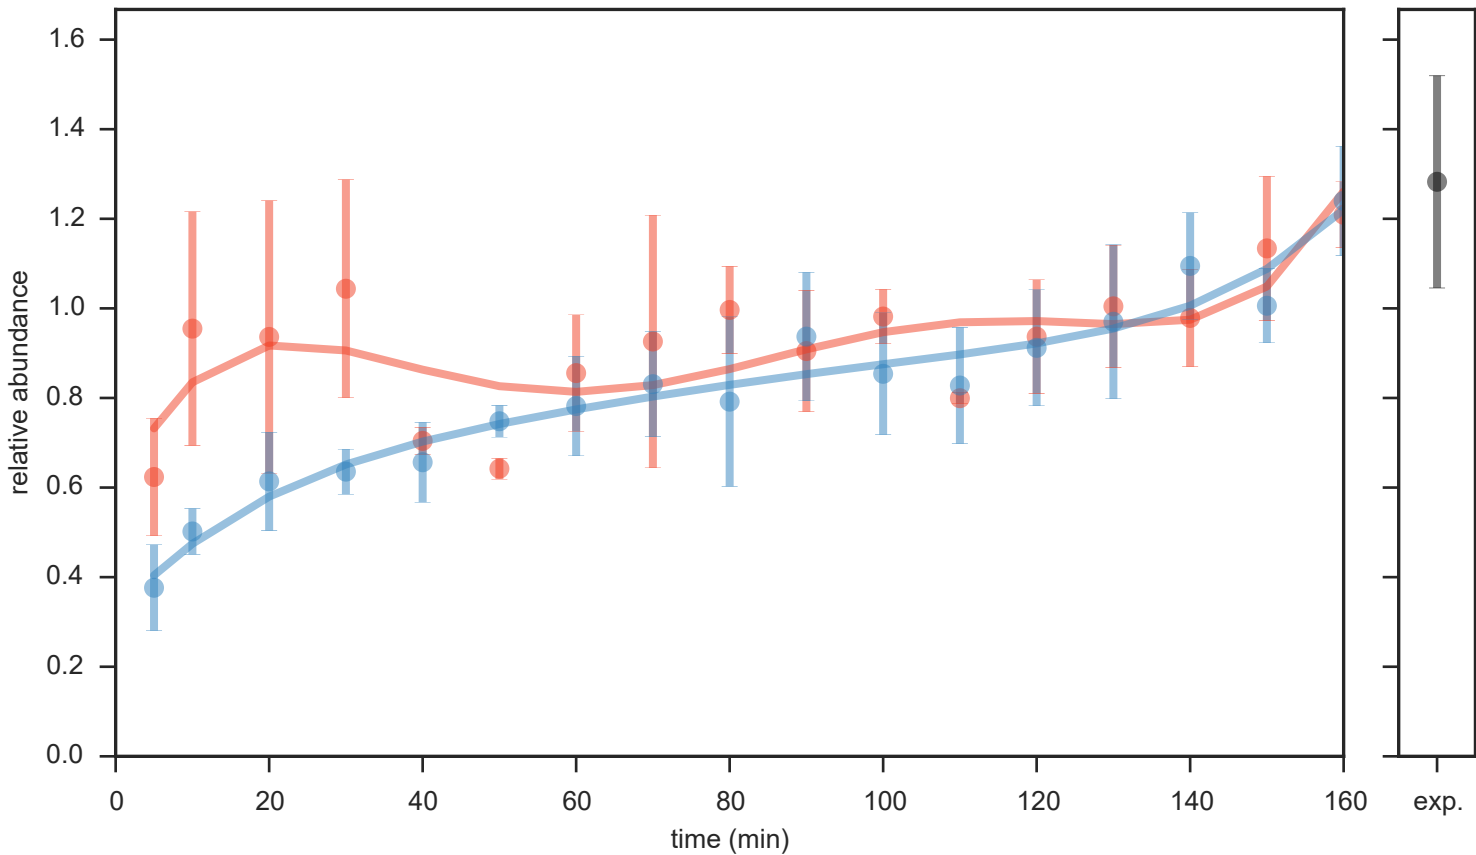

idms\_pid112\_mz260.48

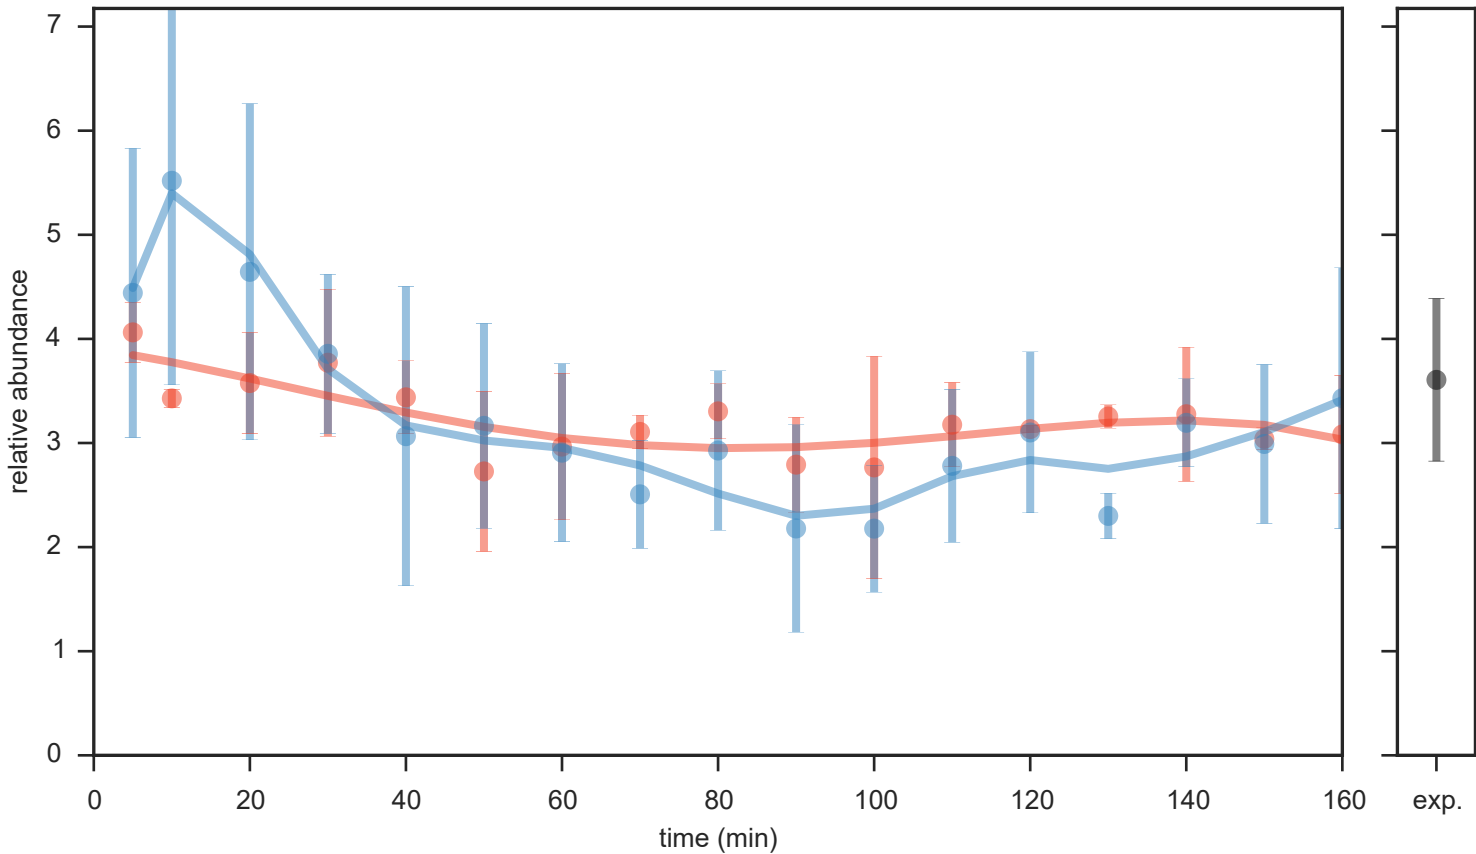

idms\_pid113\_mz241.01

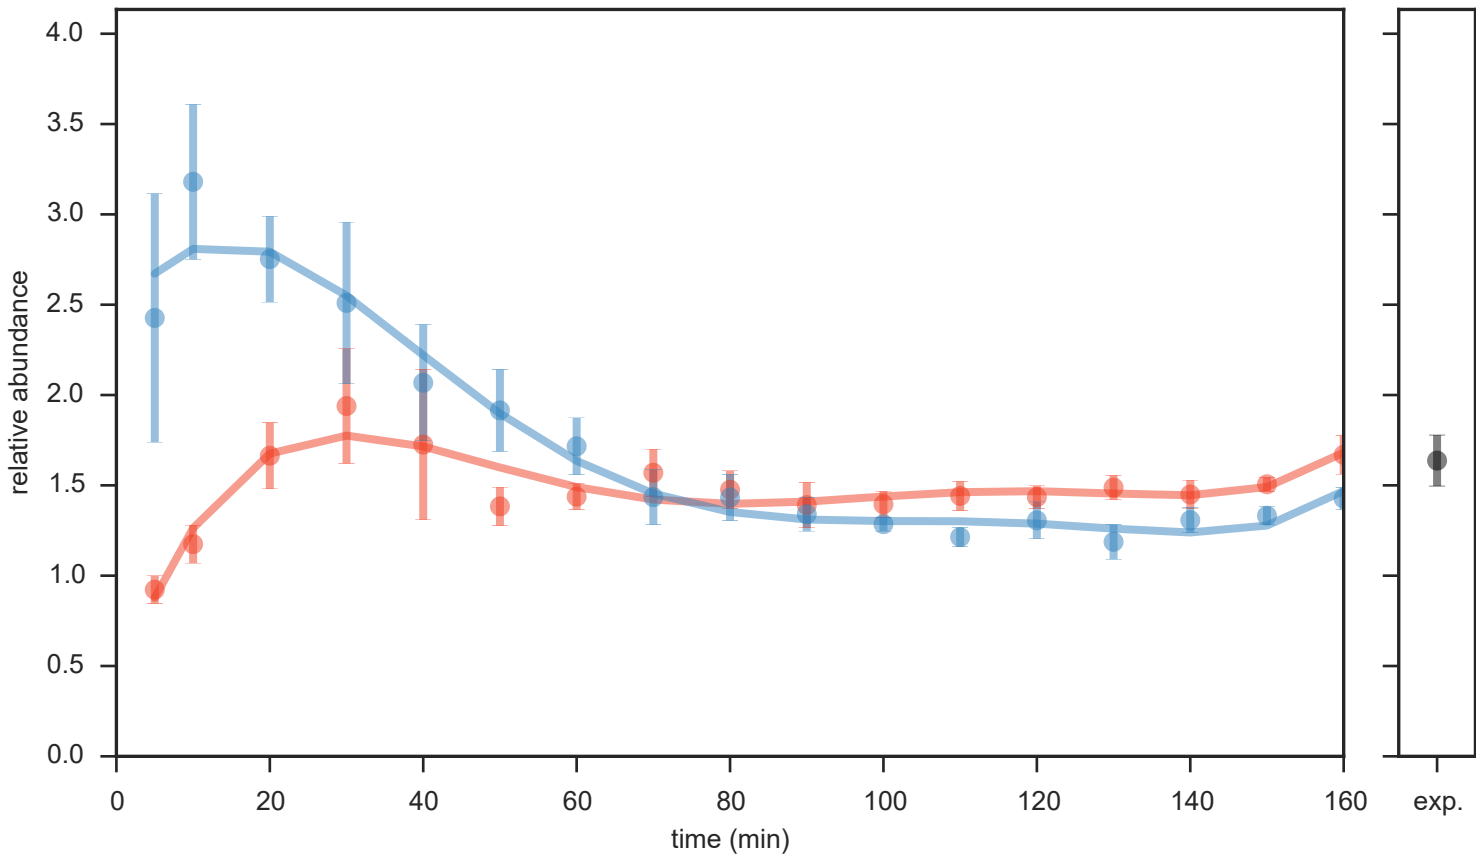

idms\_pid115\_mz281.00

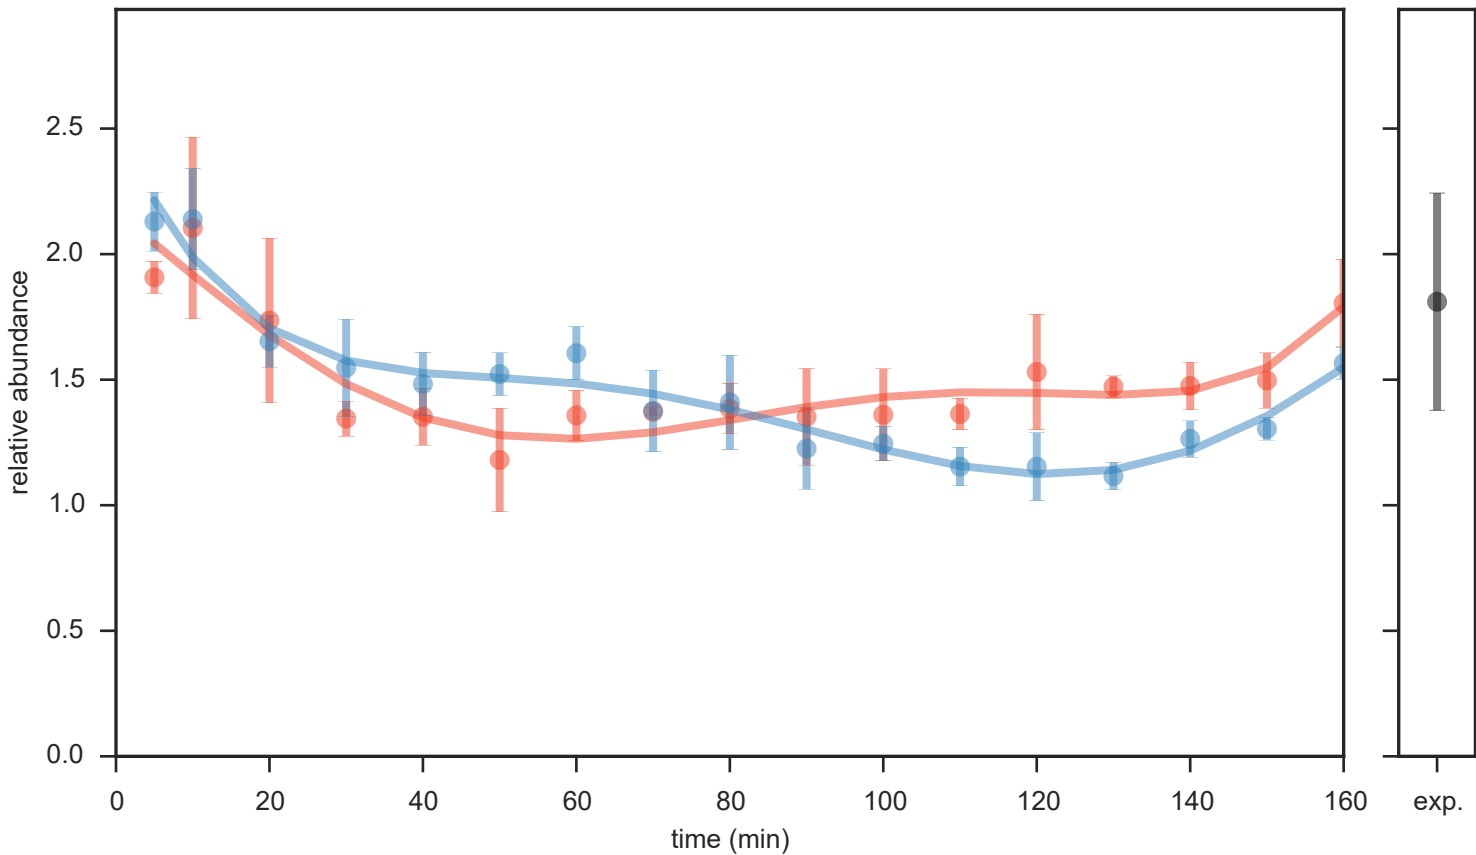

idms\_pid125\_mz134.04

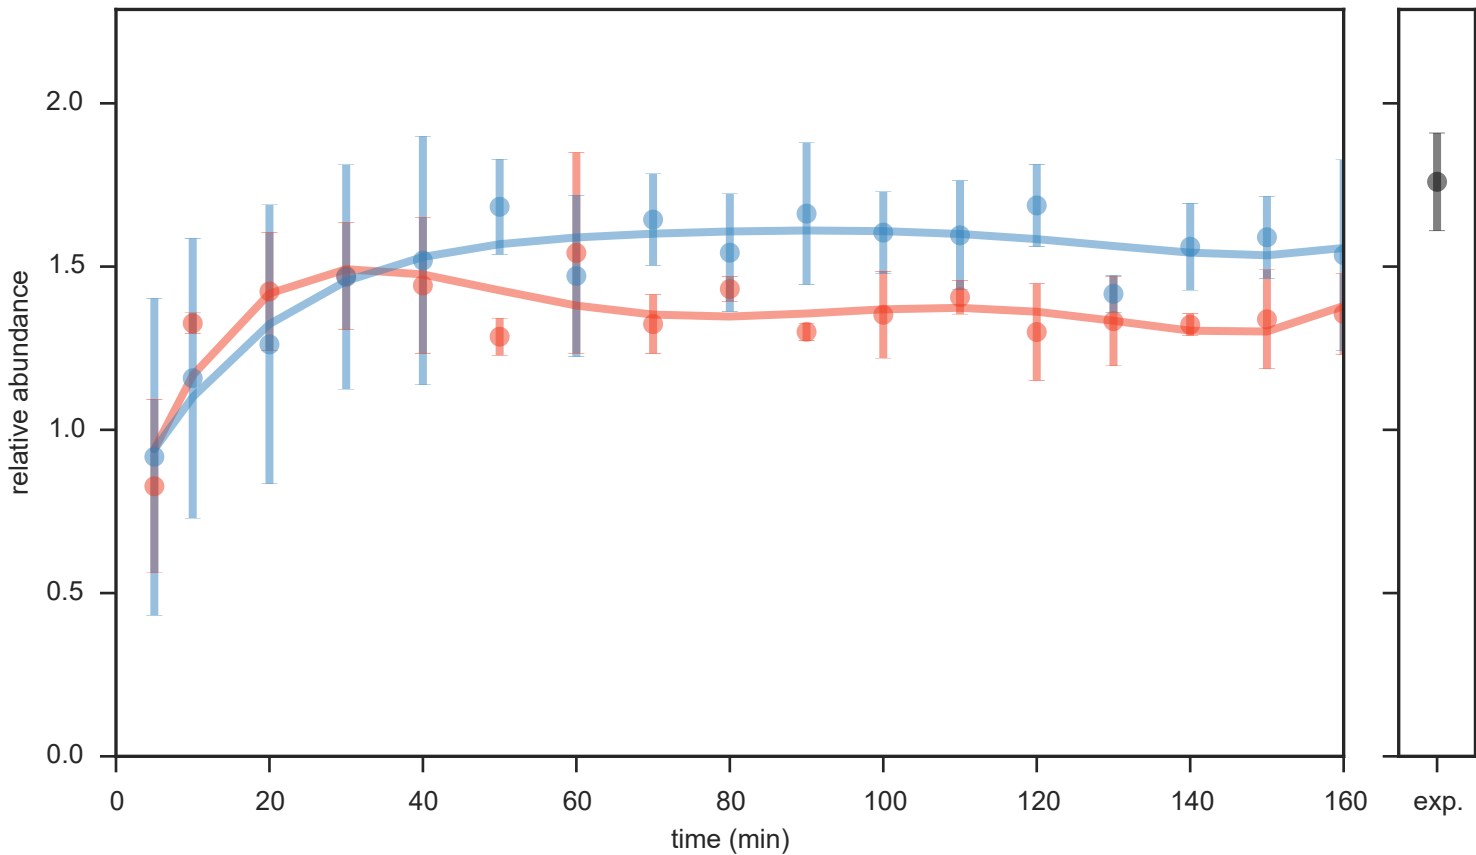



idms\_pid126\_mz381.54

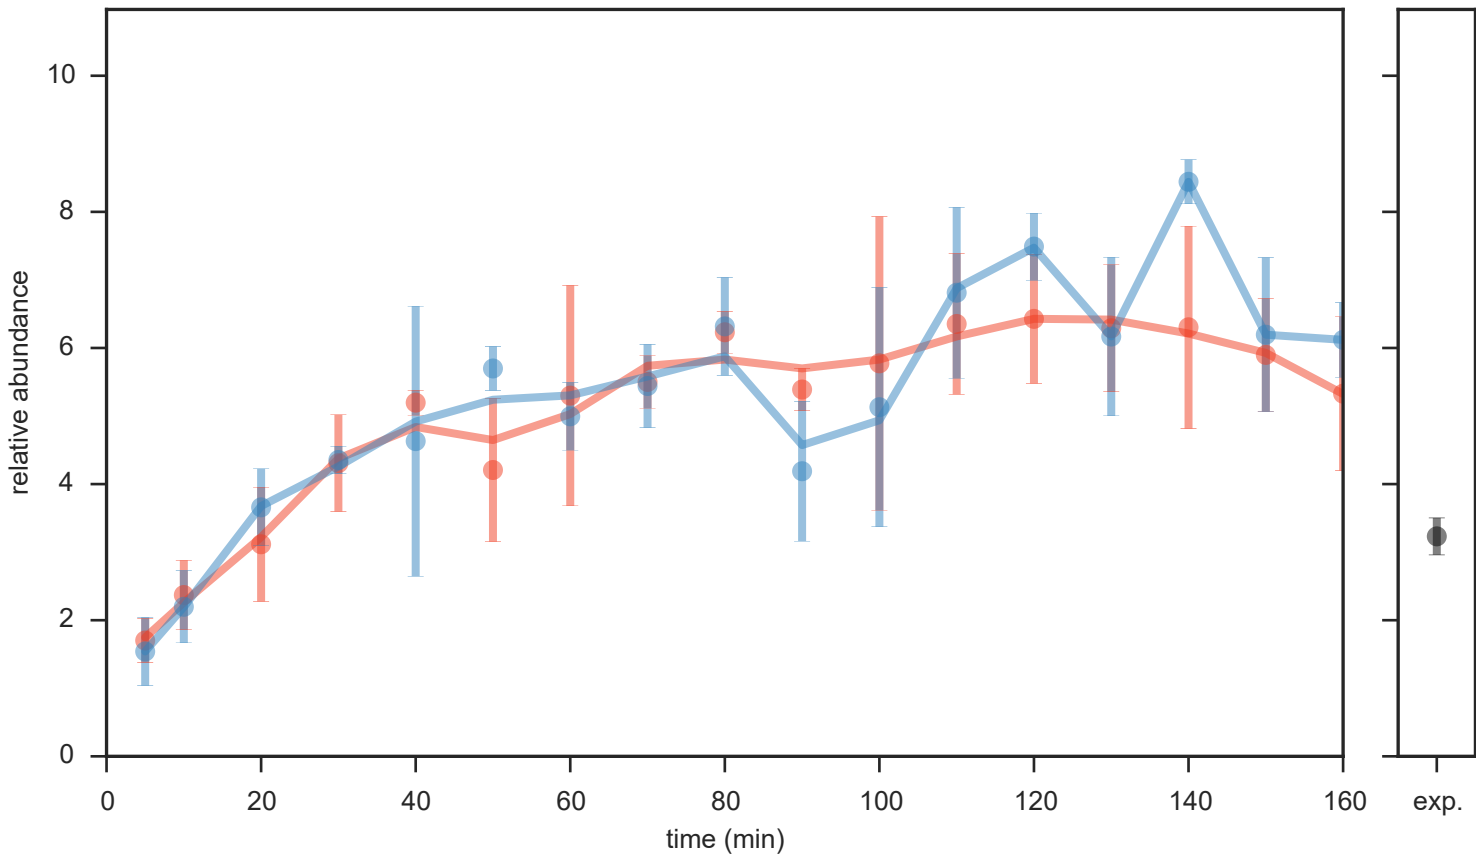

idms\_pid128\_mz519.05

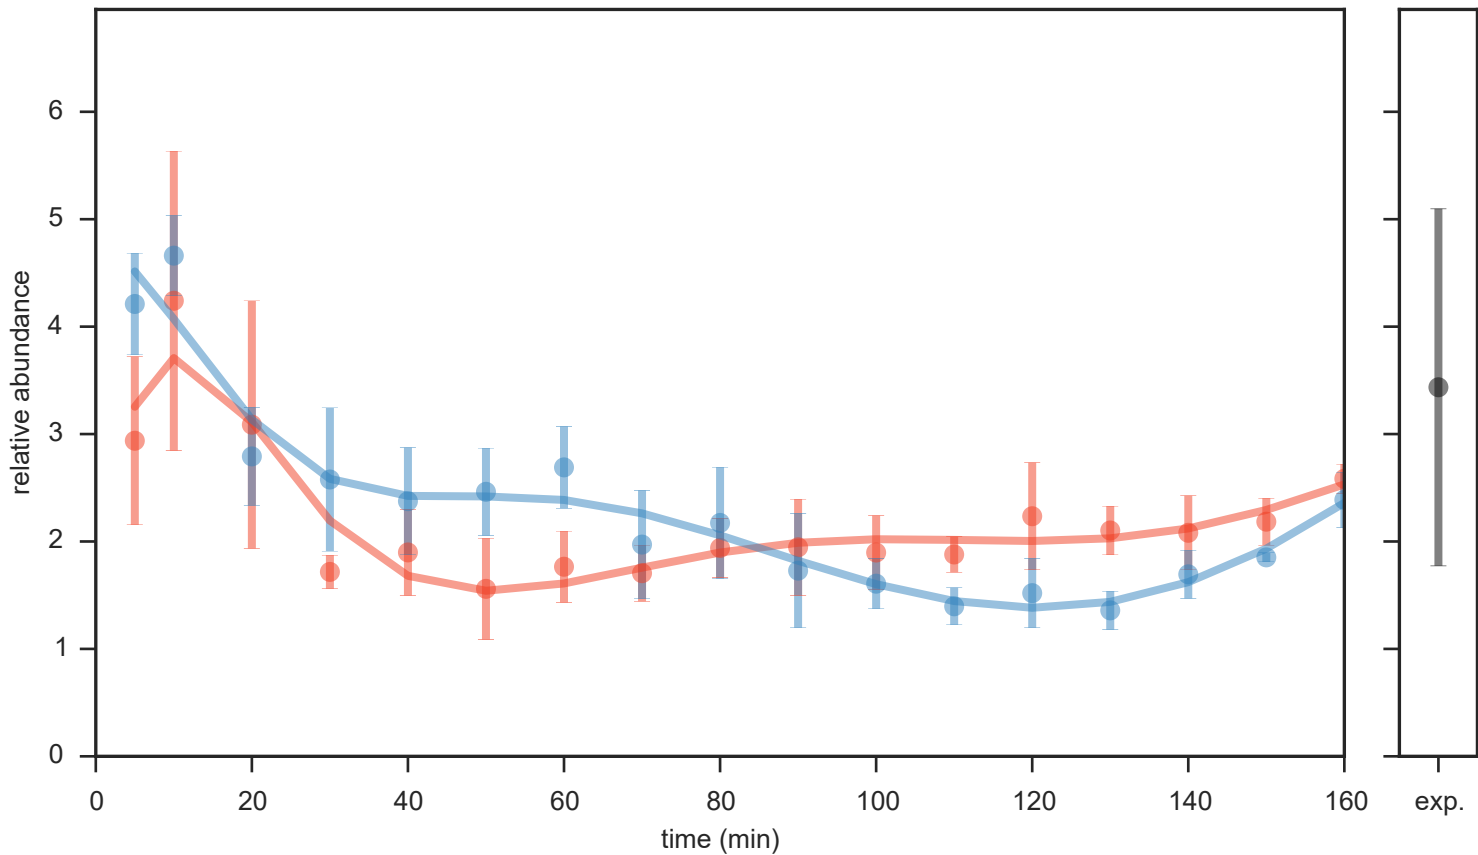

idms\_pid134\_mz151.52

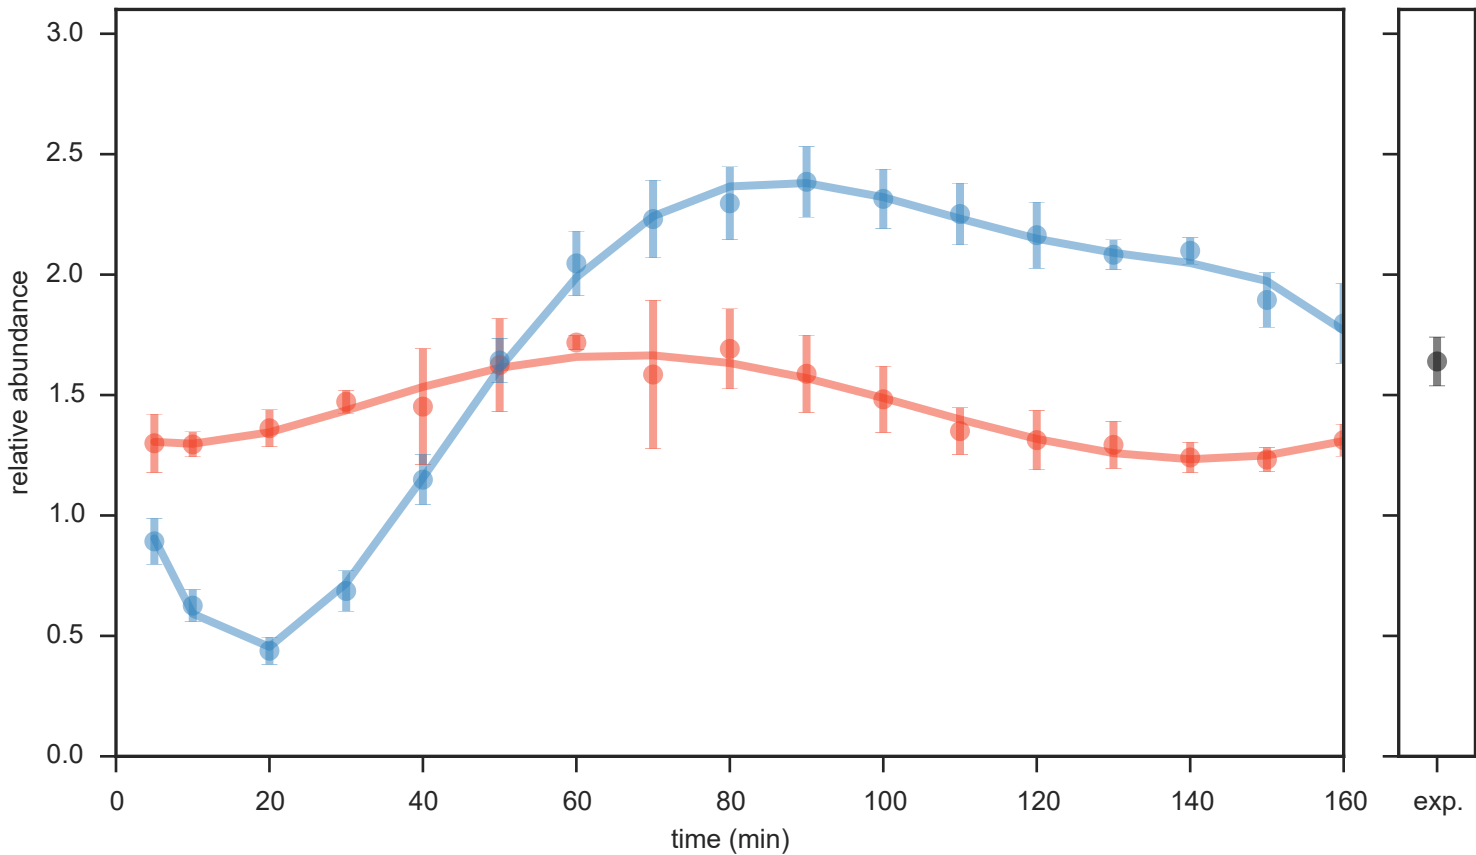

idms\_pid135\_mz321.04

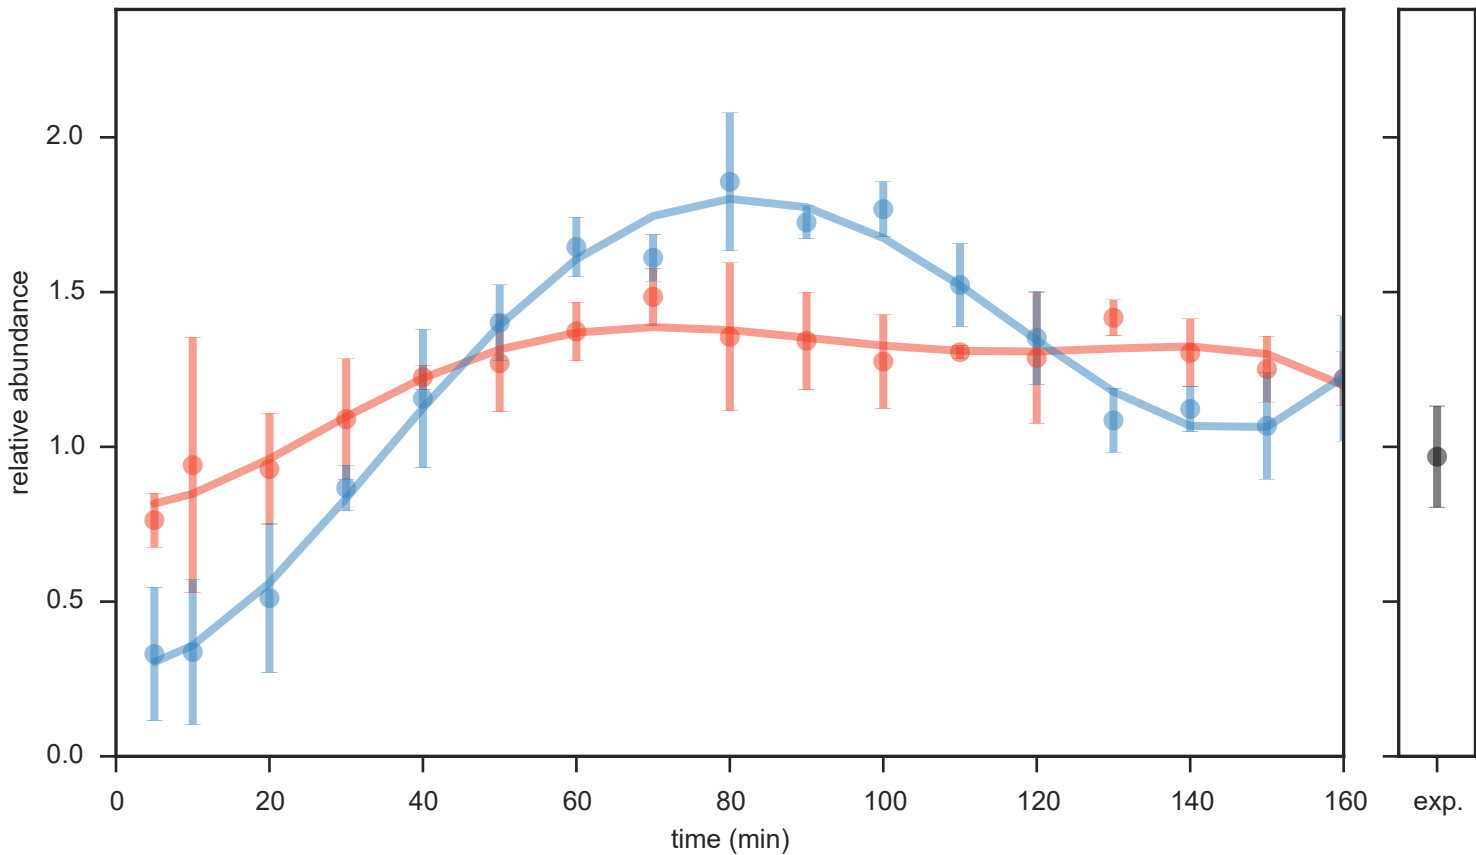

idms\_pid145\_mz408.88

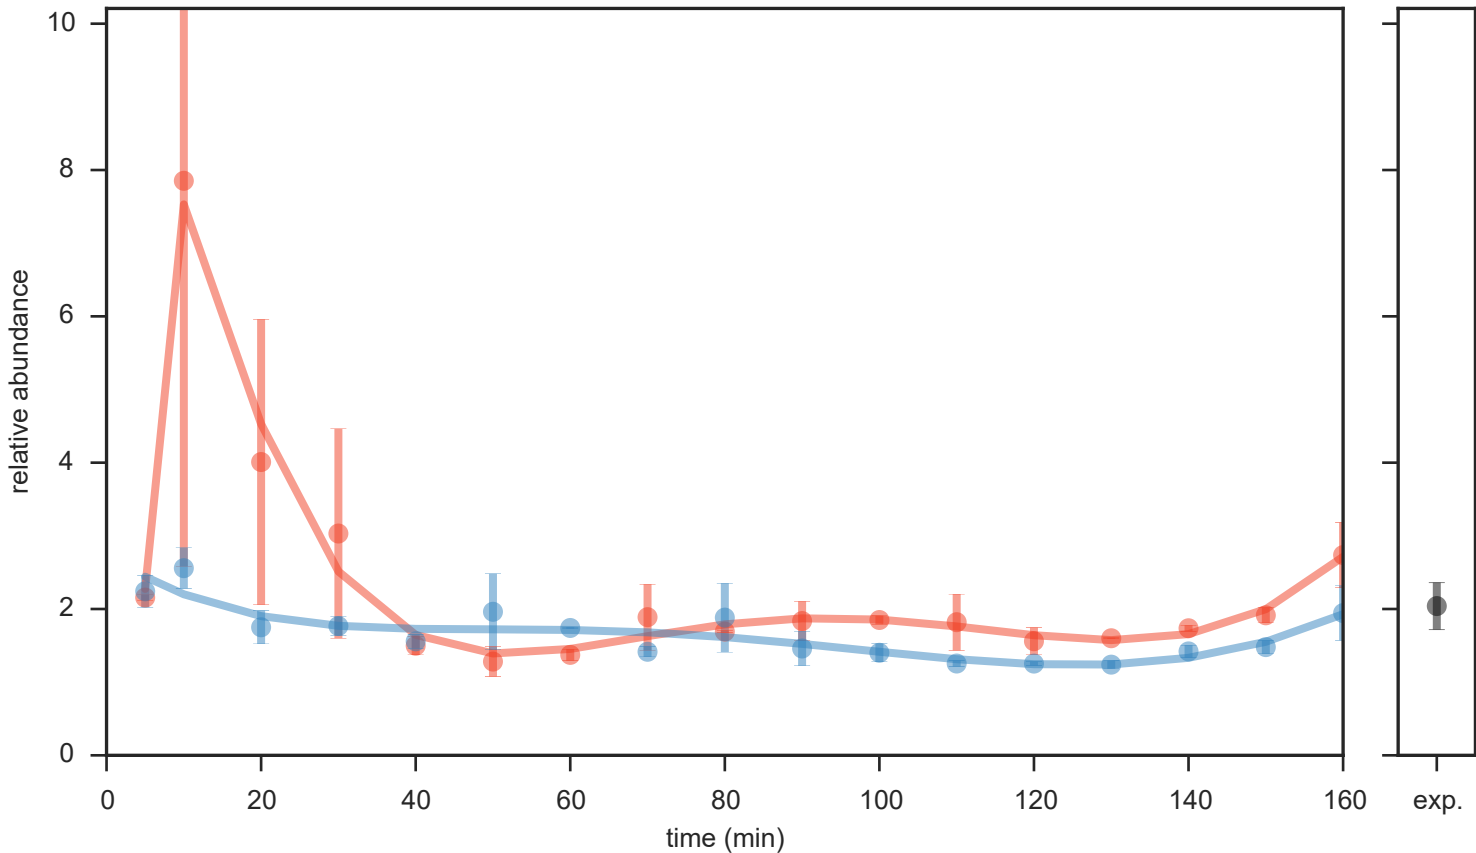

idms\_pid147\_mz406.88

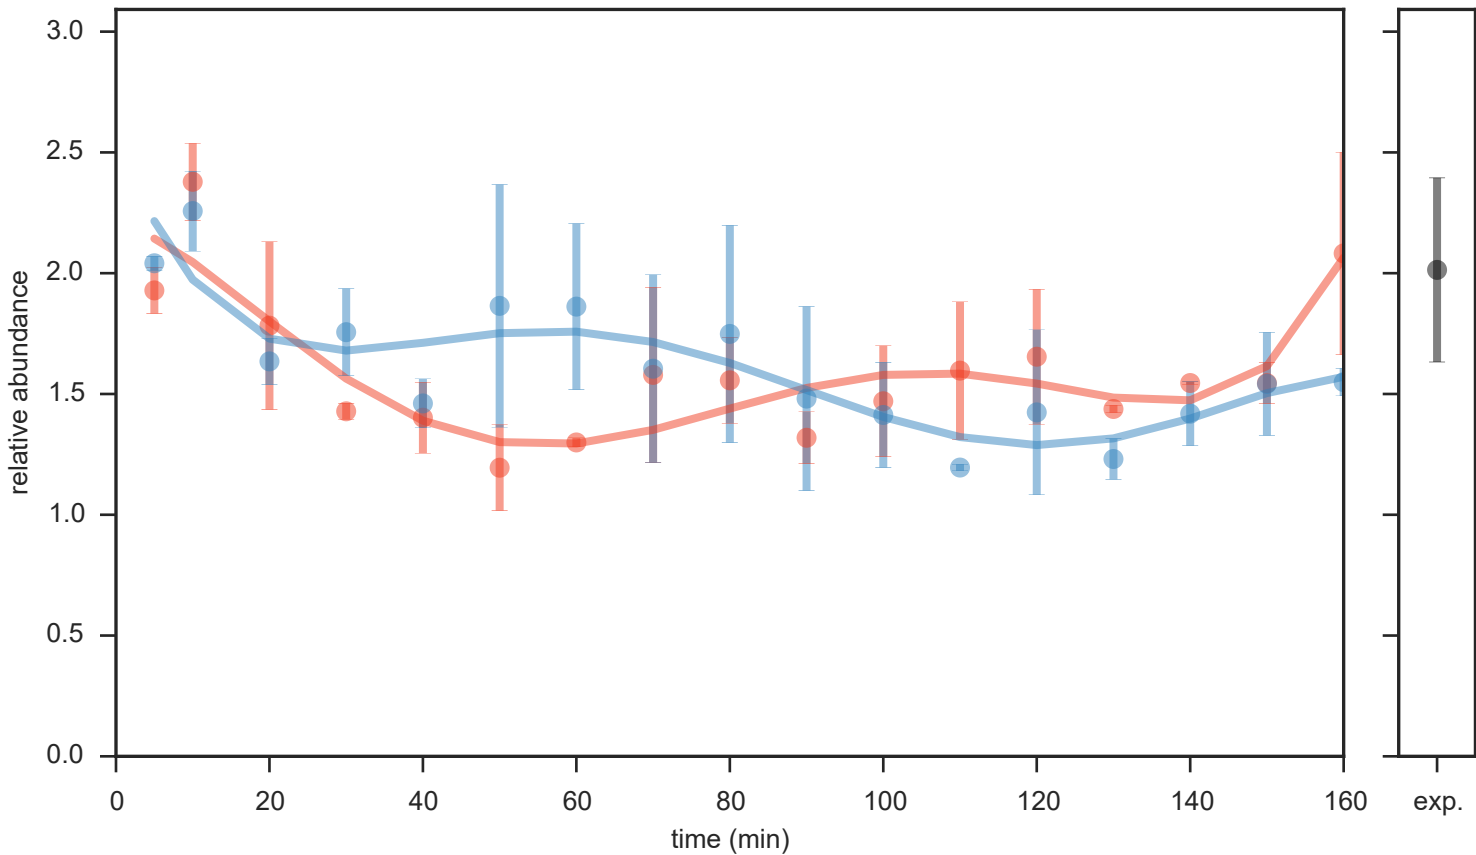

idms\_pid154\_mz319.05

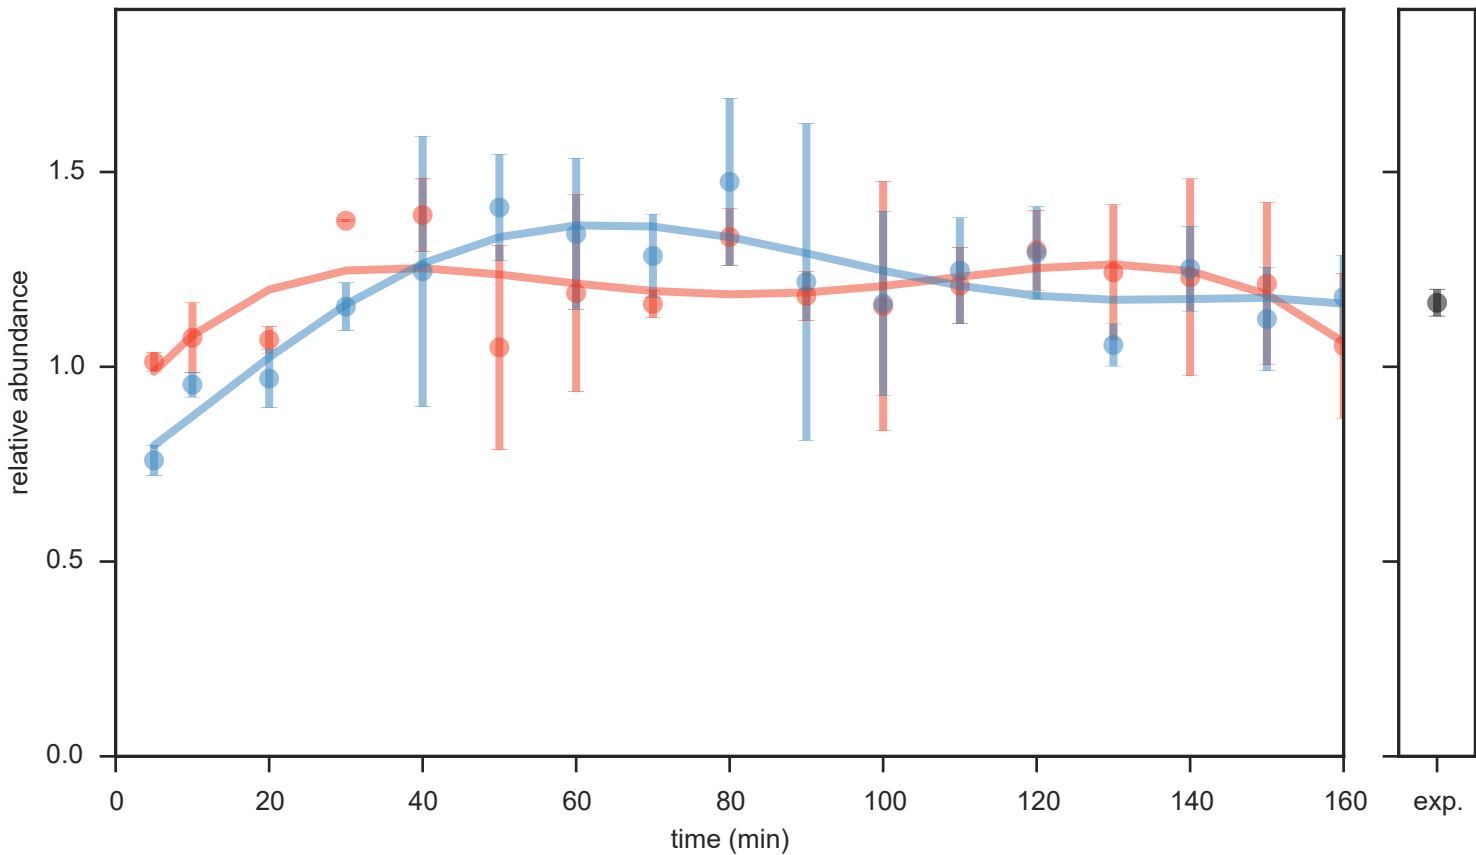

idms\_pid160\_mz127.99

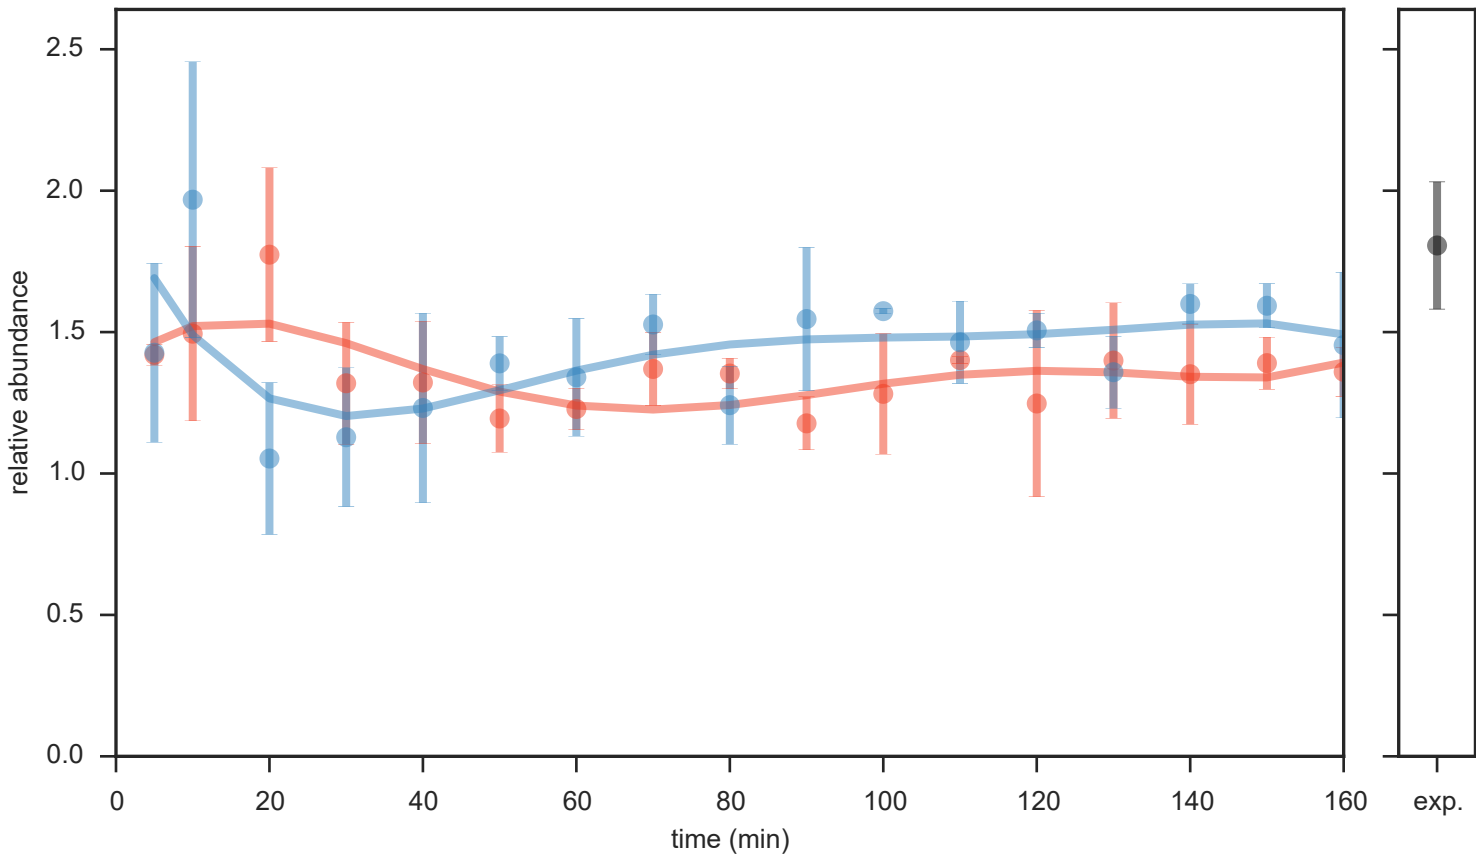



idms\_pid164\_mz270.69

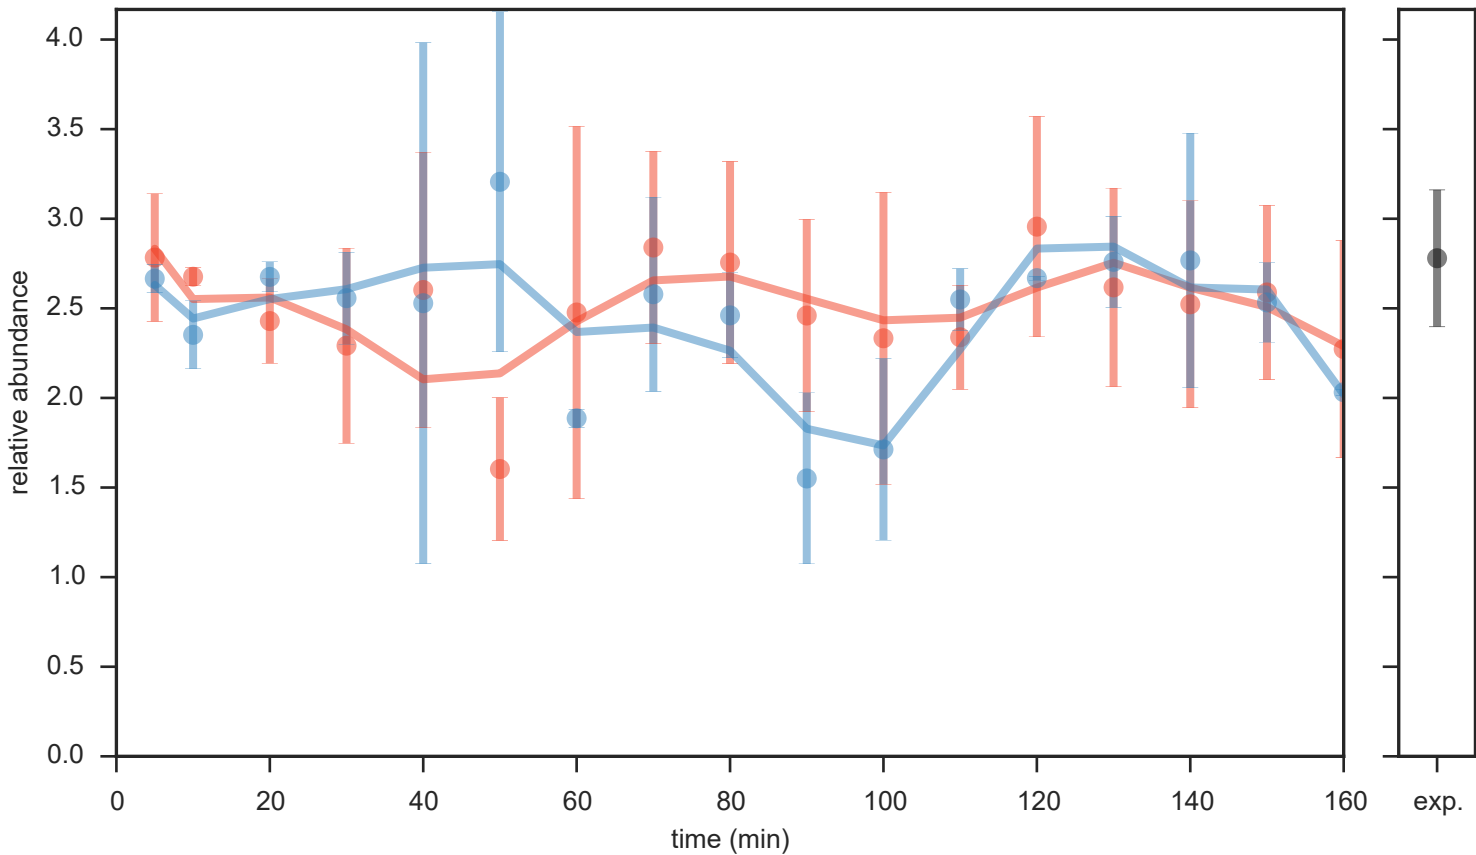

idms\_pid167\_mz321.04

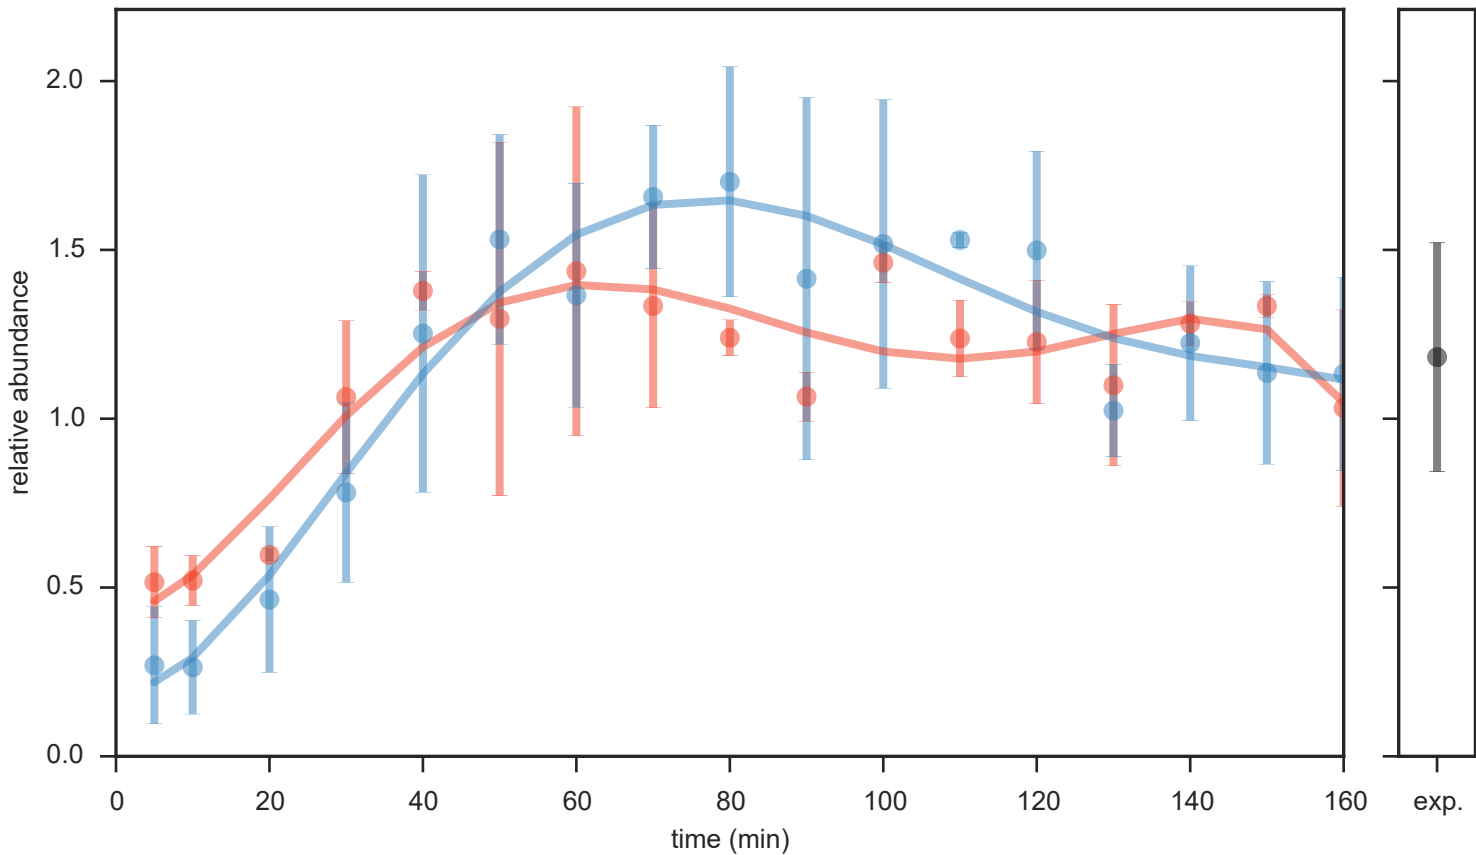

idms\_pid169\_mz289.10

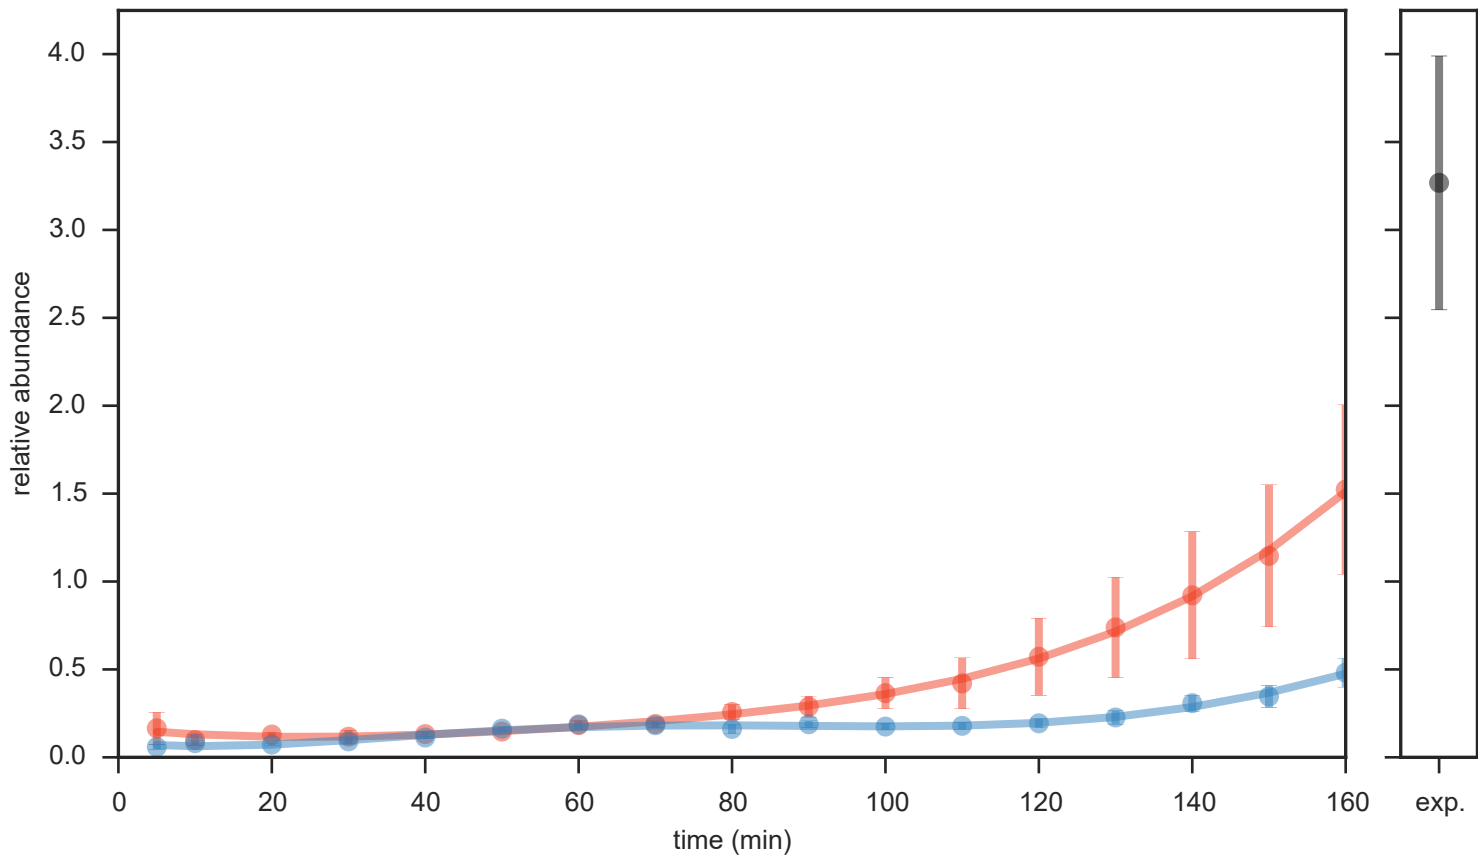

idms\_pid171\_mz495.20

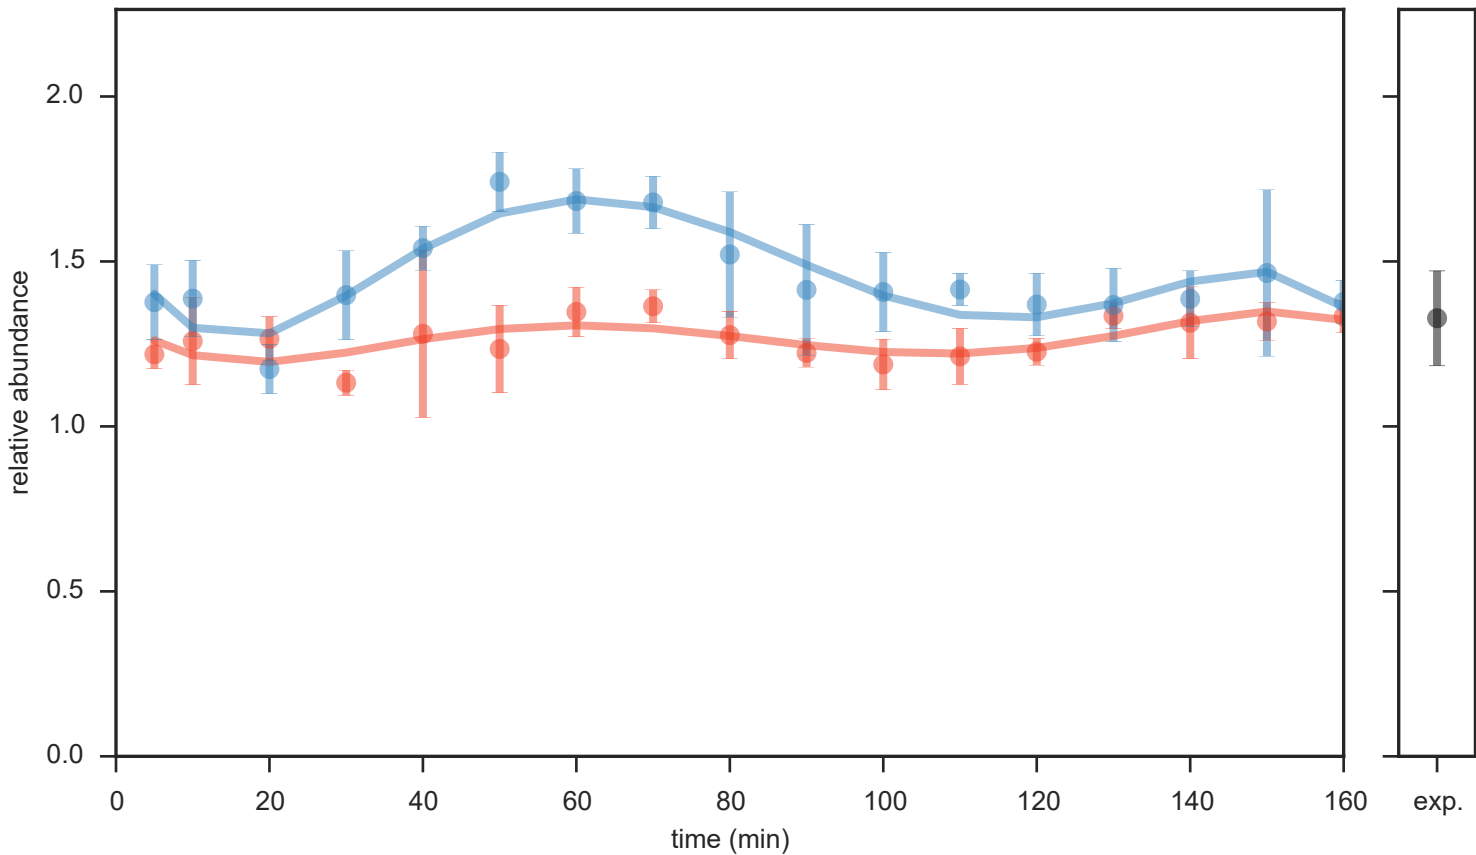

idms\_pid172\_mz160.05

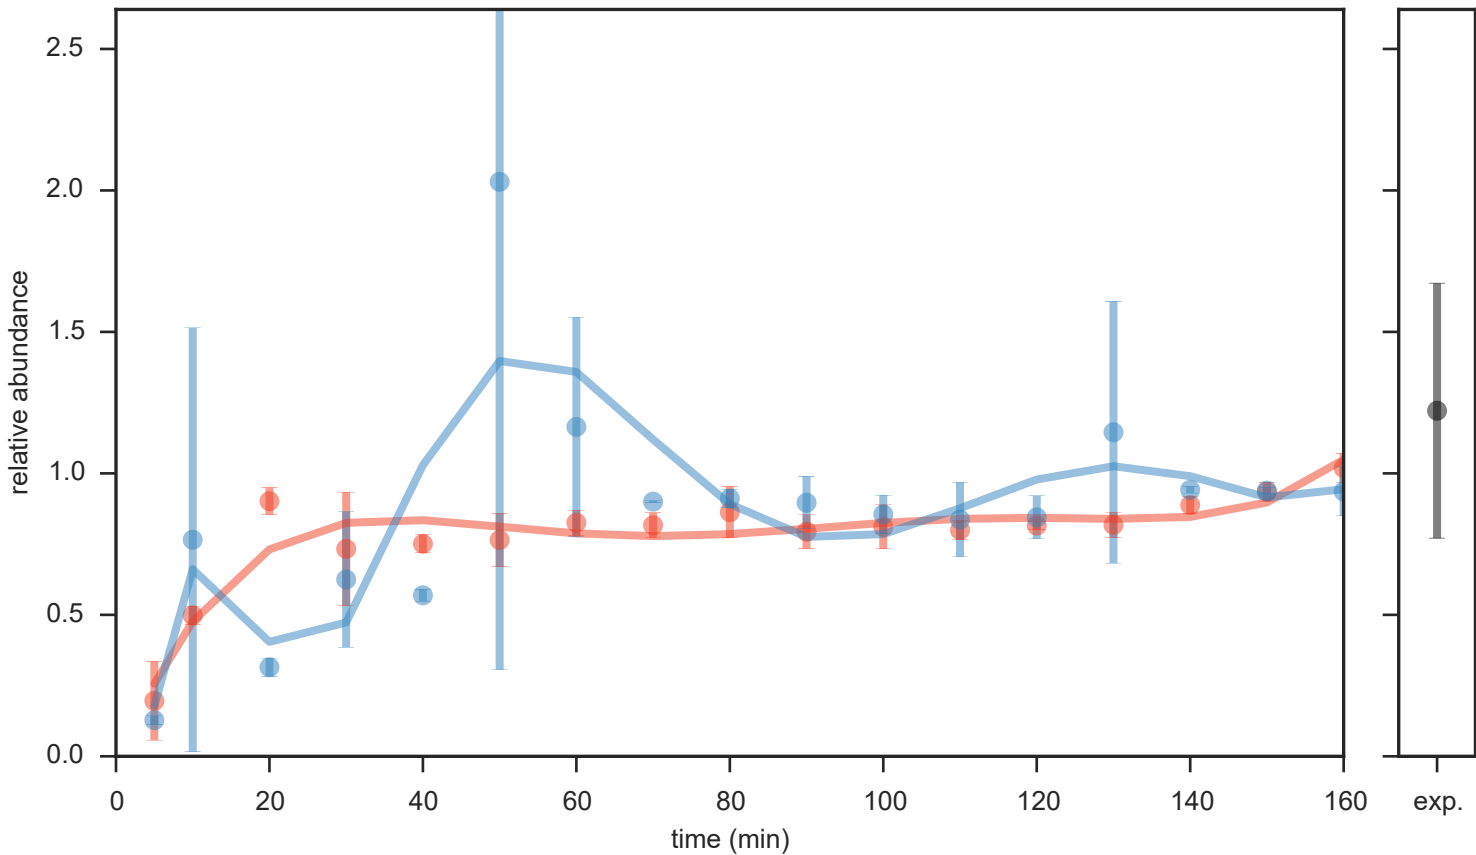

idms\_pid173\_mz308.53

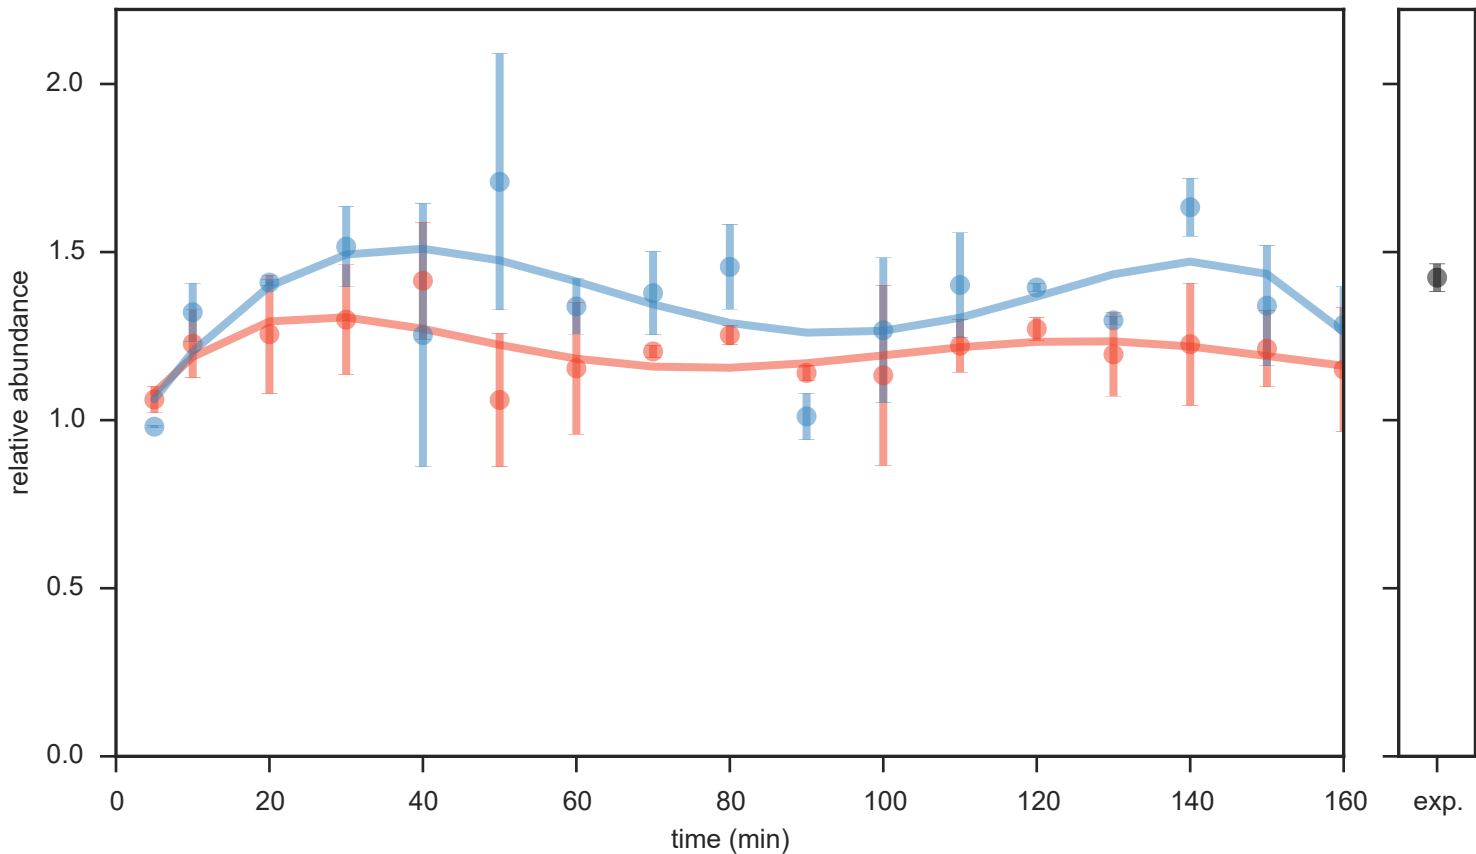

idms\_pid176\_mz240.02

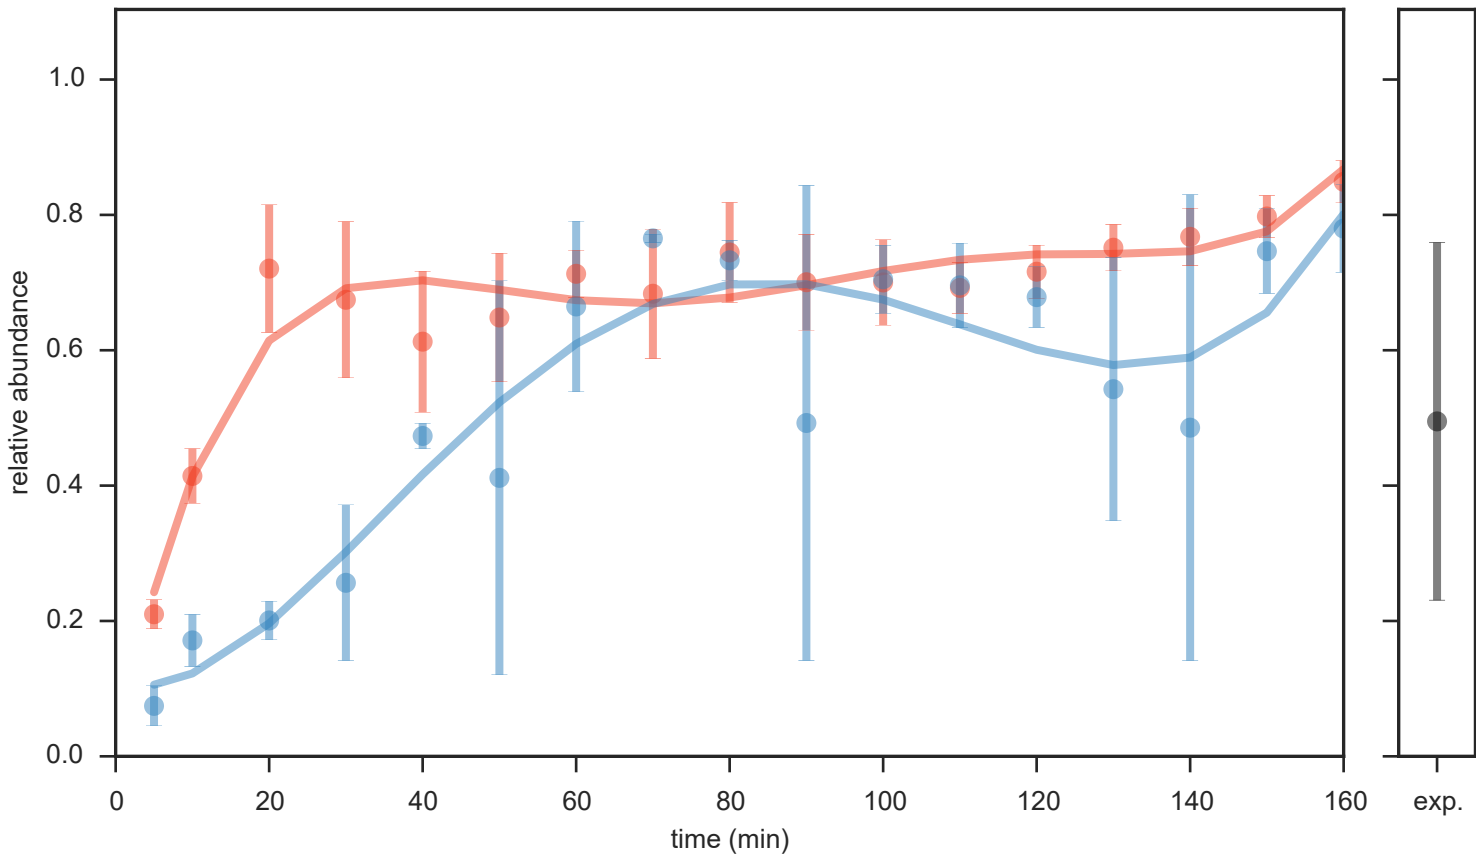

idms\_pid190\_mz239.91

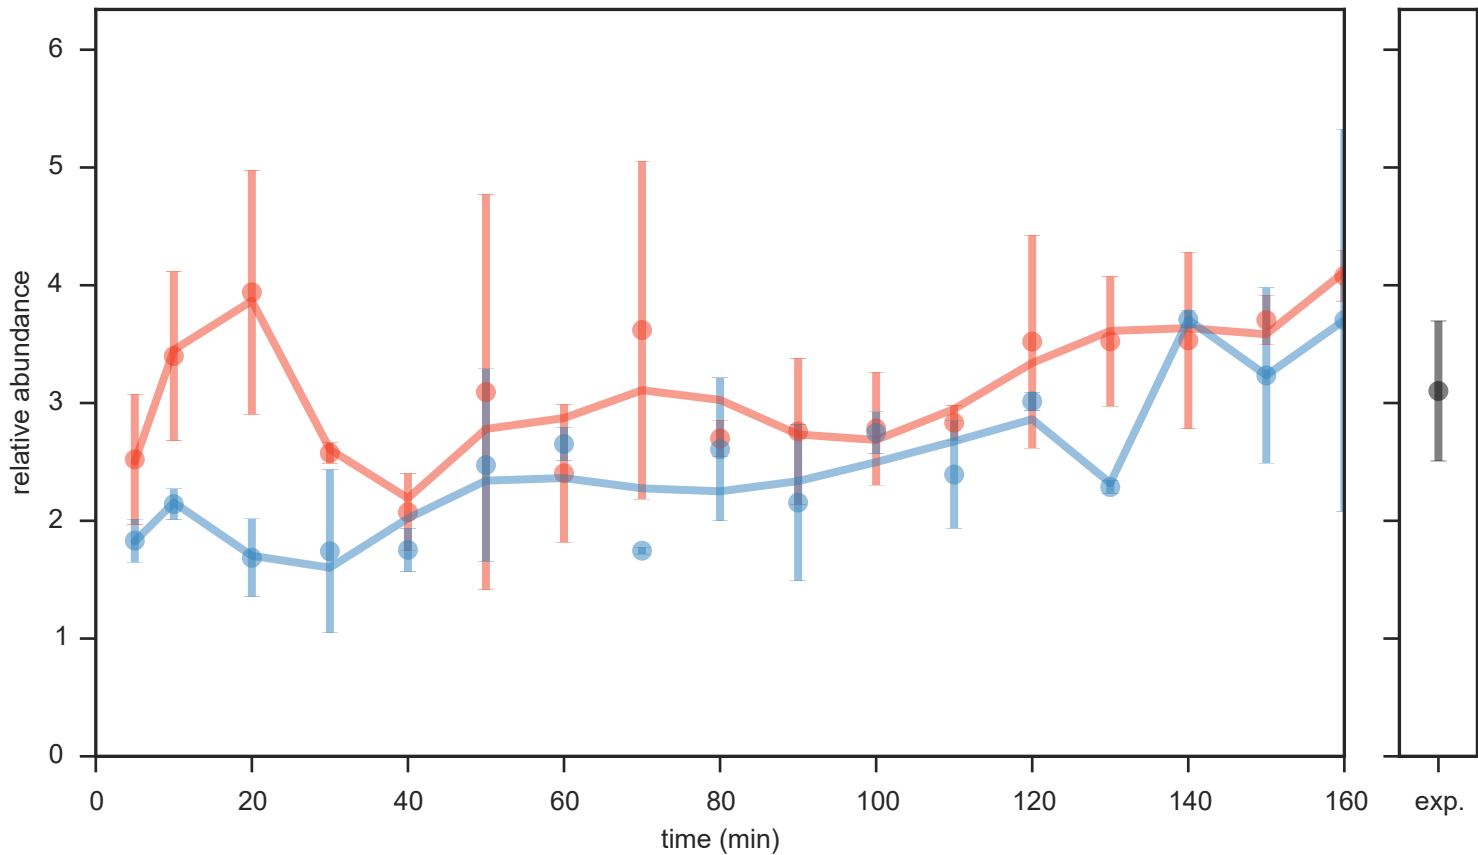



idms\_pid194\_mz613.13

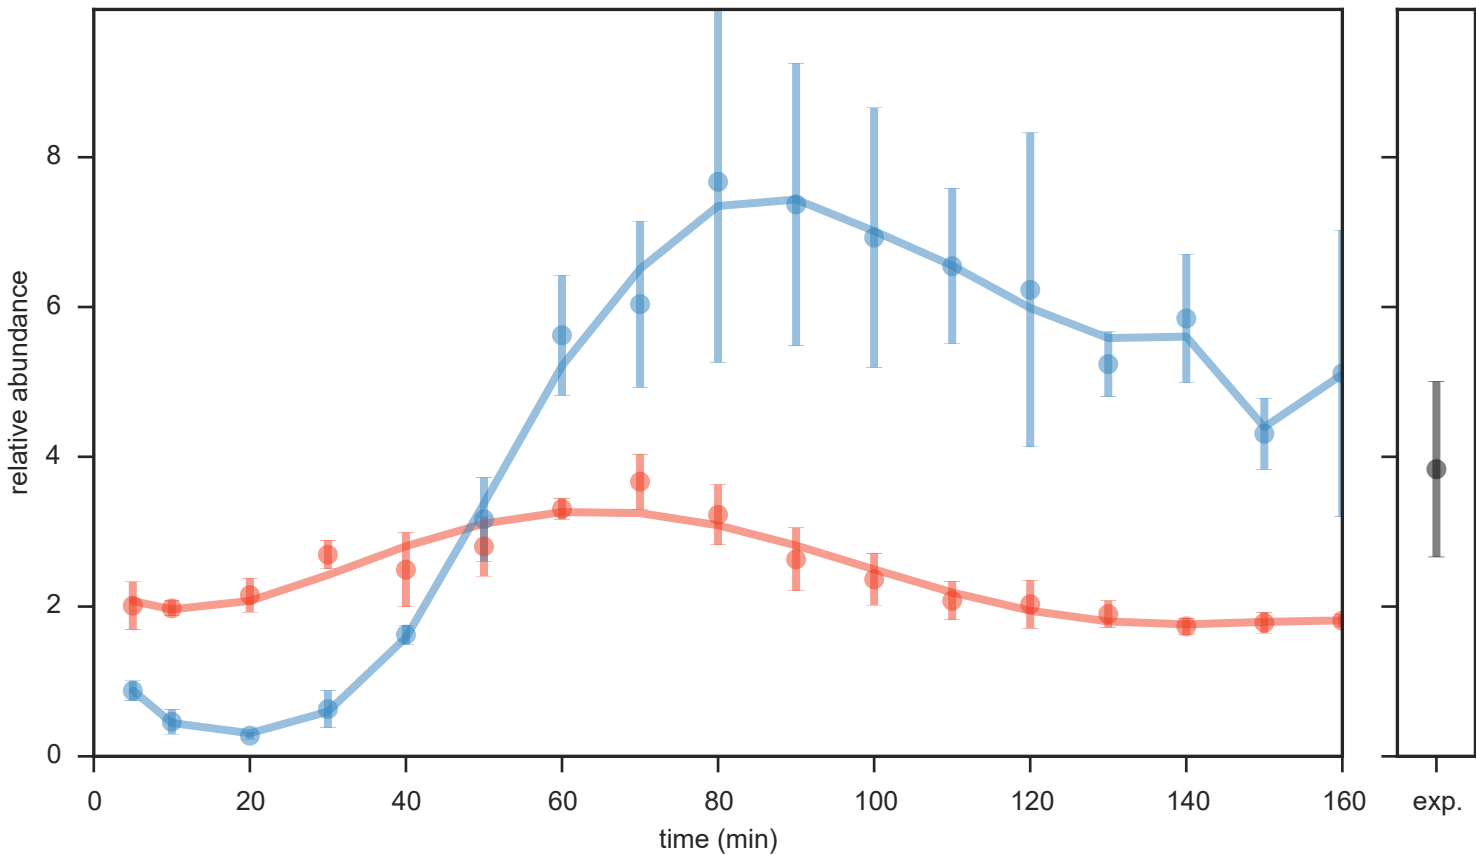

idms\_pid199\_mz358.54

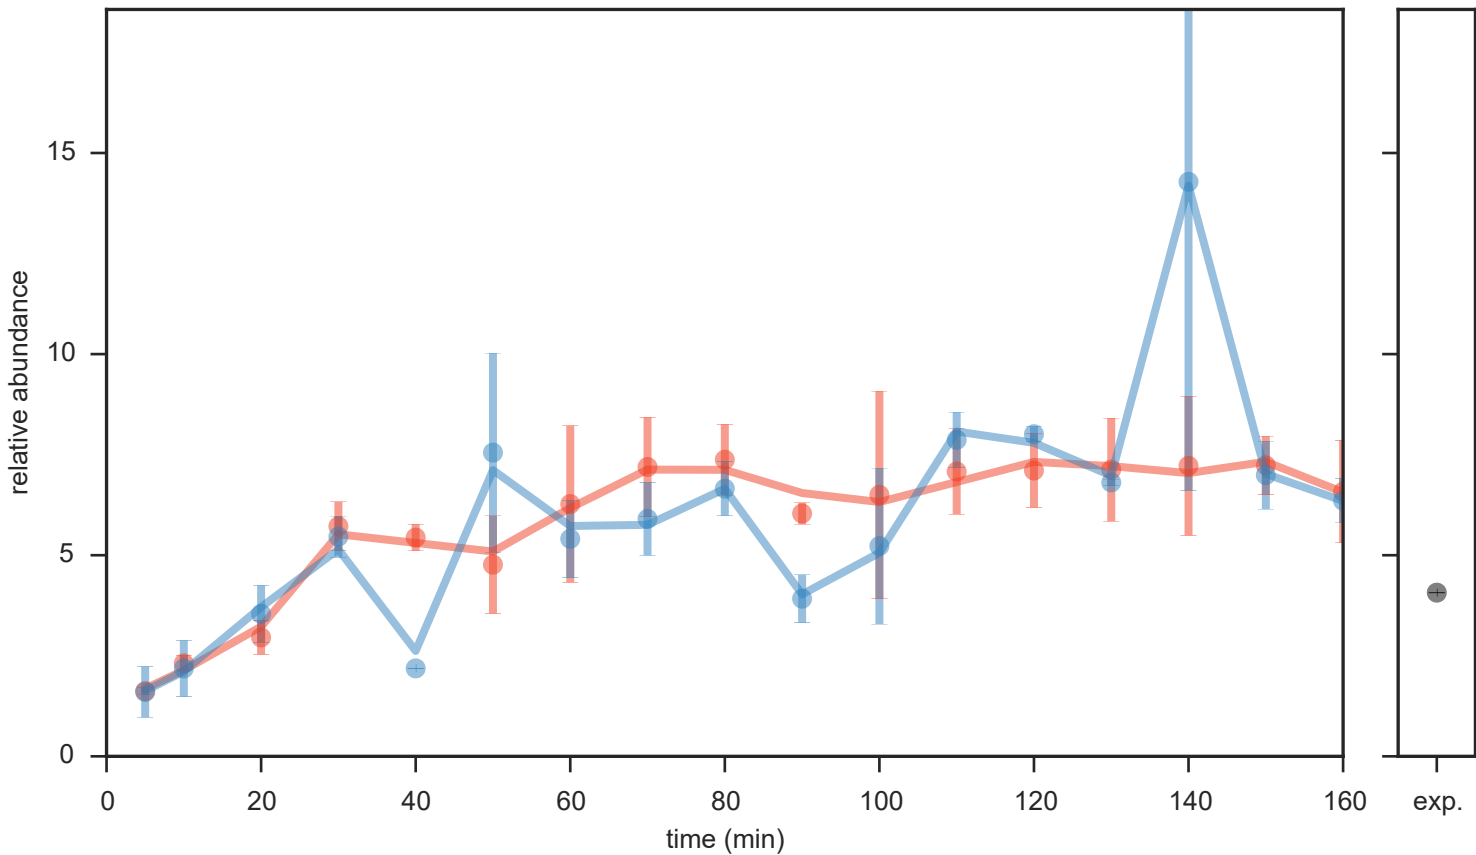

idms\_pid203\_mz301.53

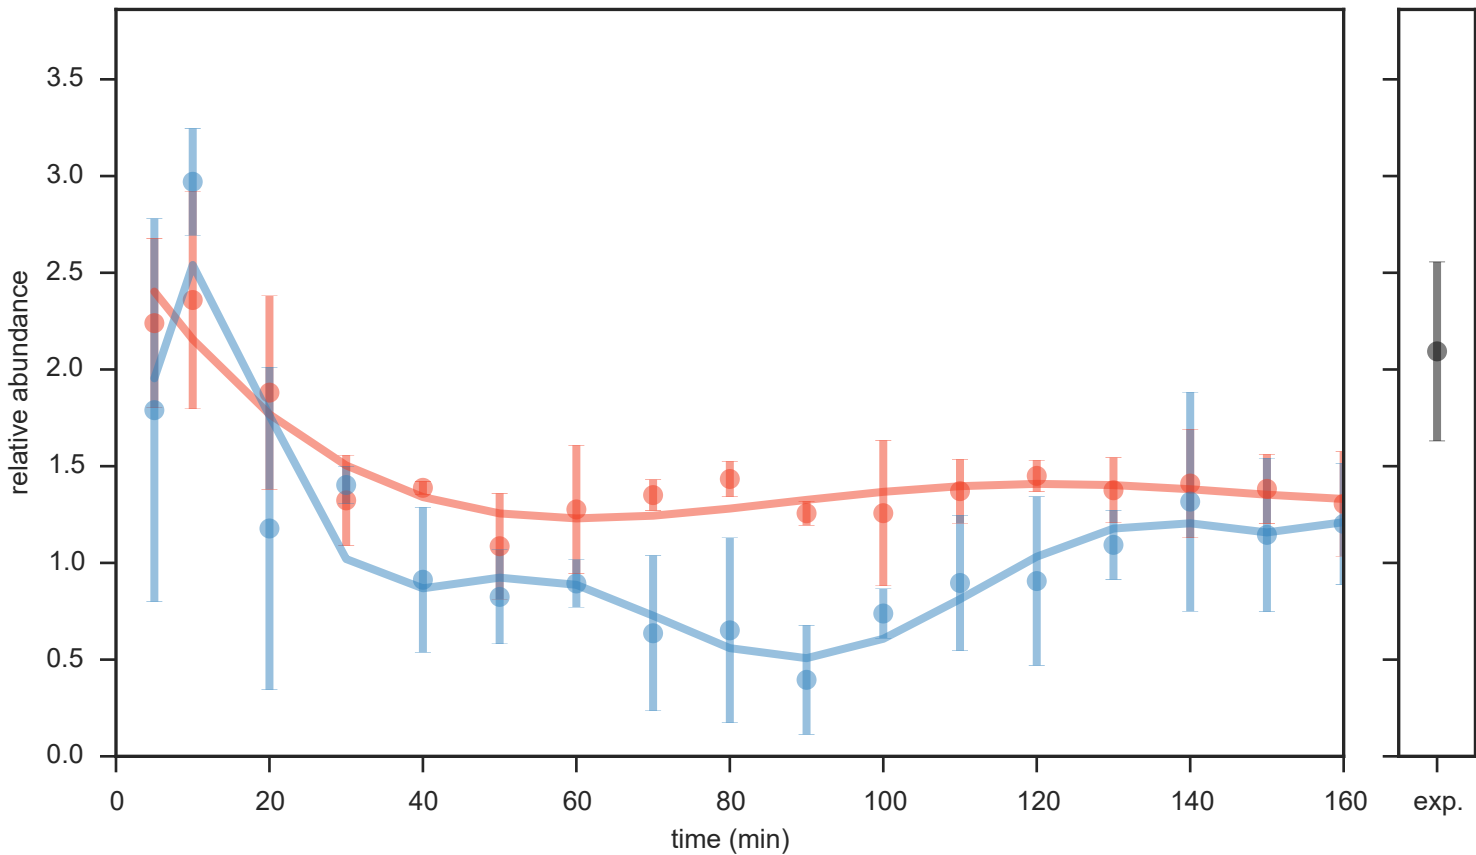

idms\_pid206\_mz294.99

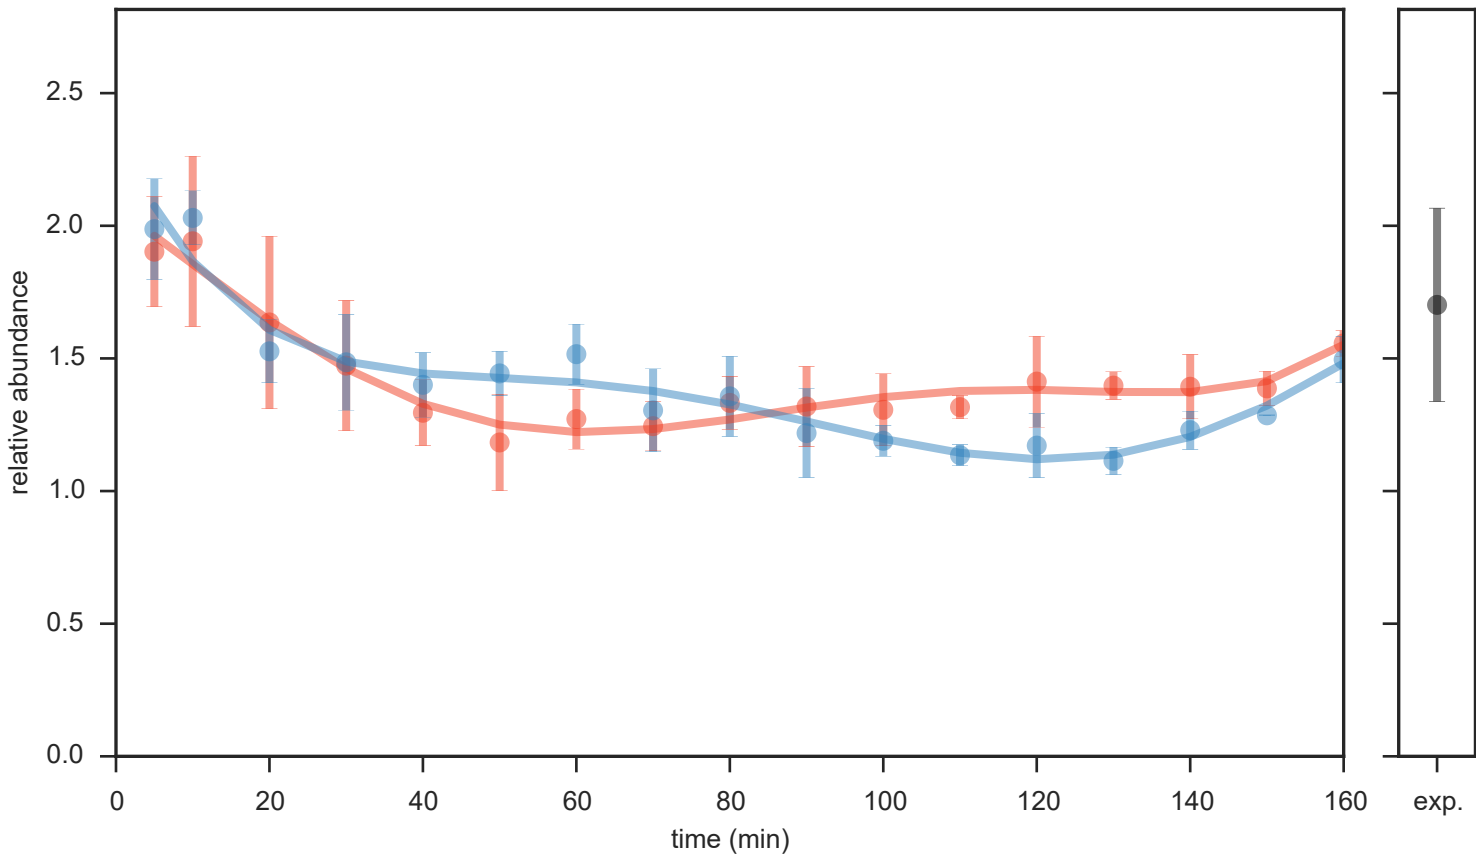

idms\_pid208\_mz273.03

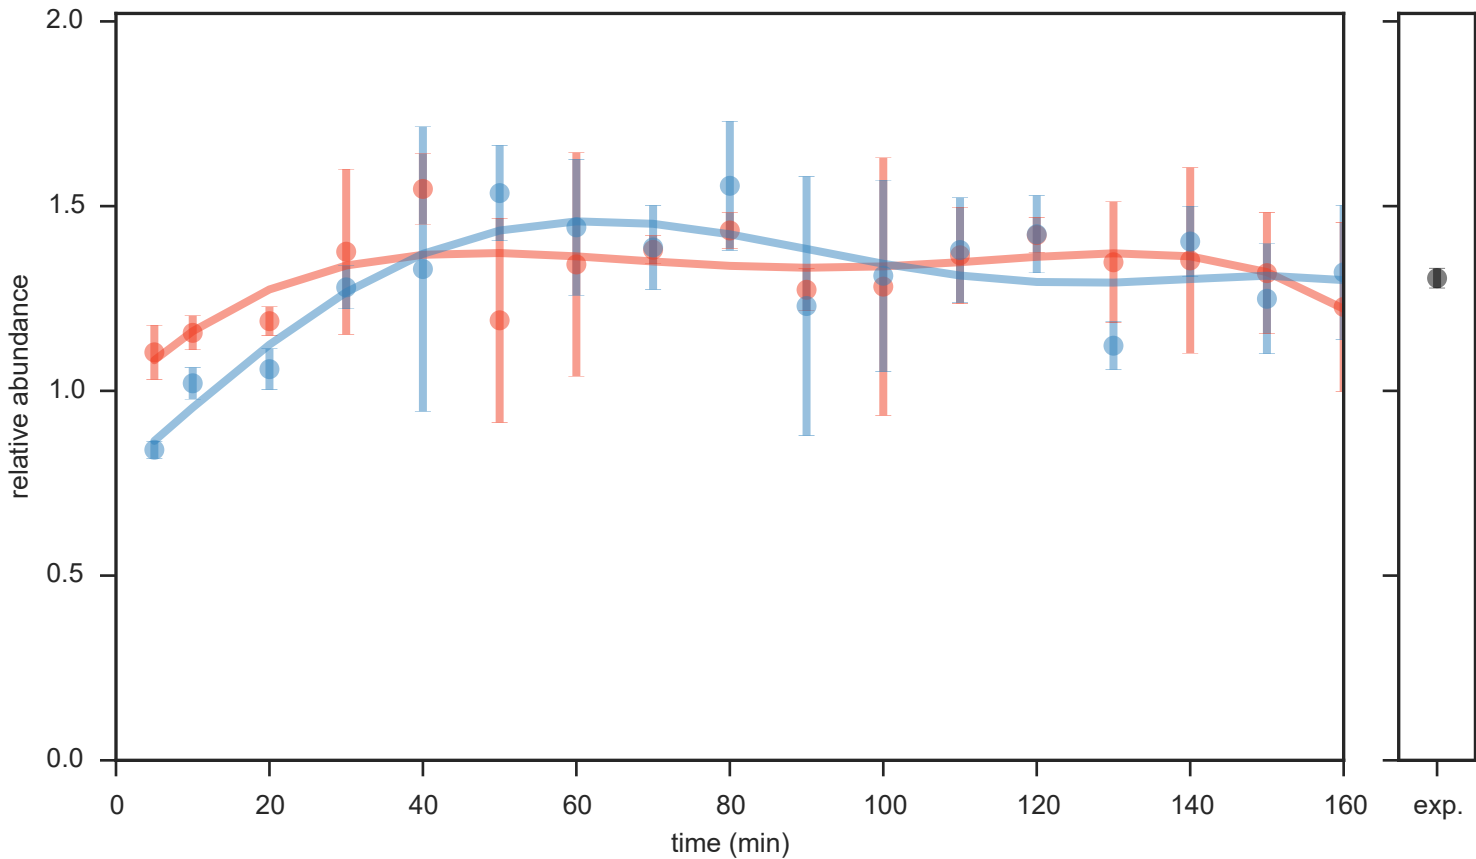

idms\_pid210\_mz236.58

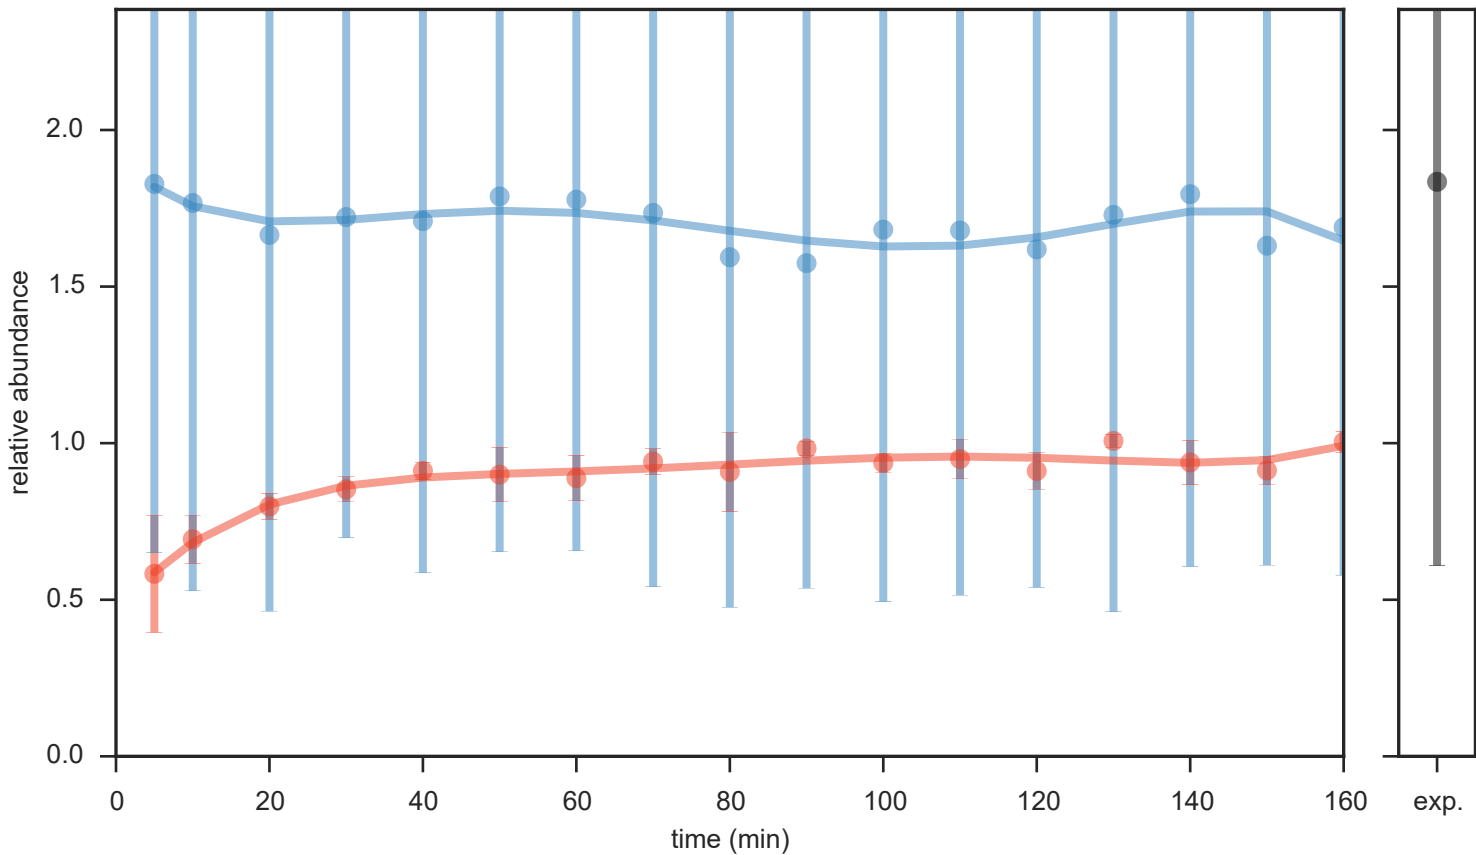

idms\_pid213\_mz394.95

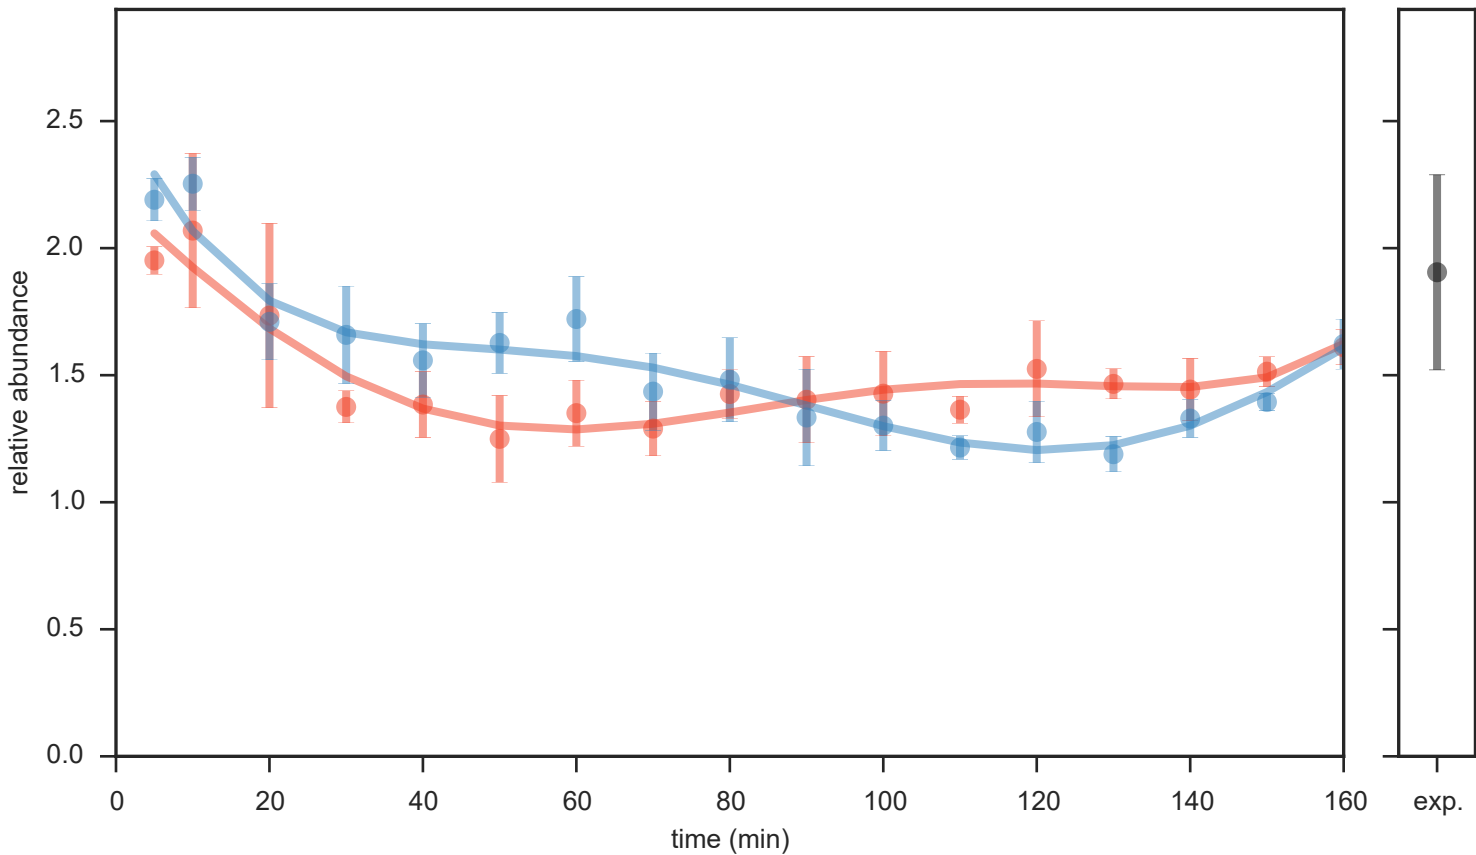

idms\_pid216\_mz220.50

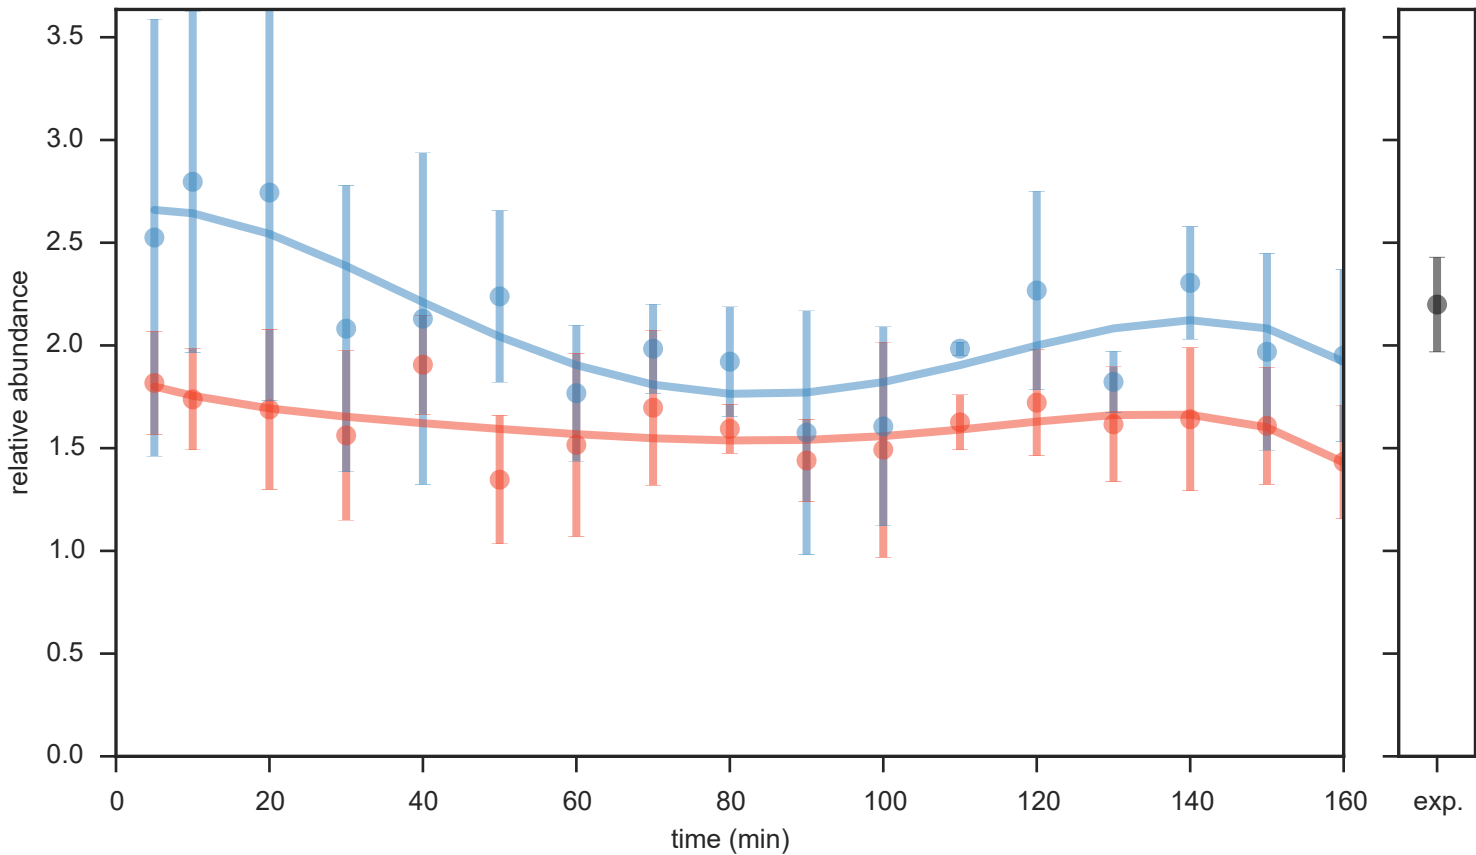



idms\_pid220\_mz188.05

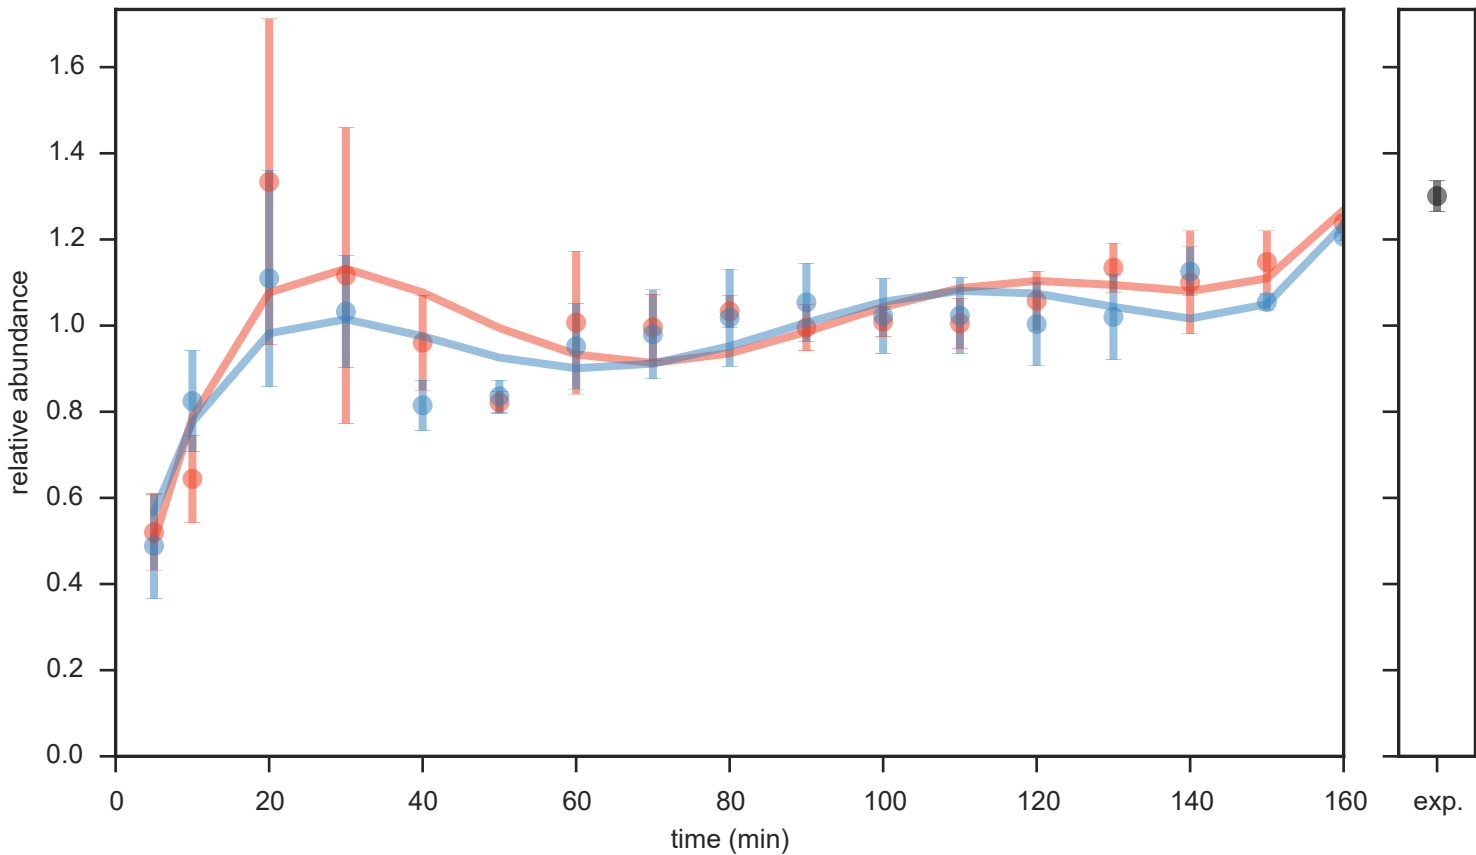

idms\_pid224\_mz210.99

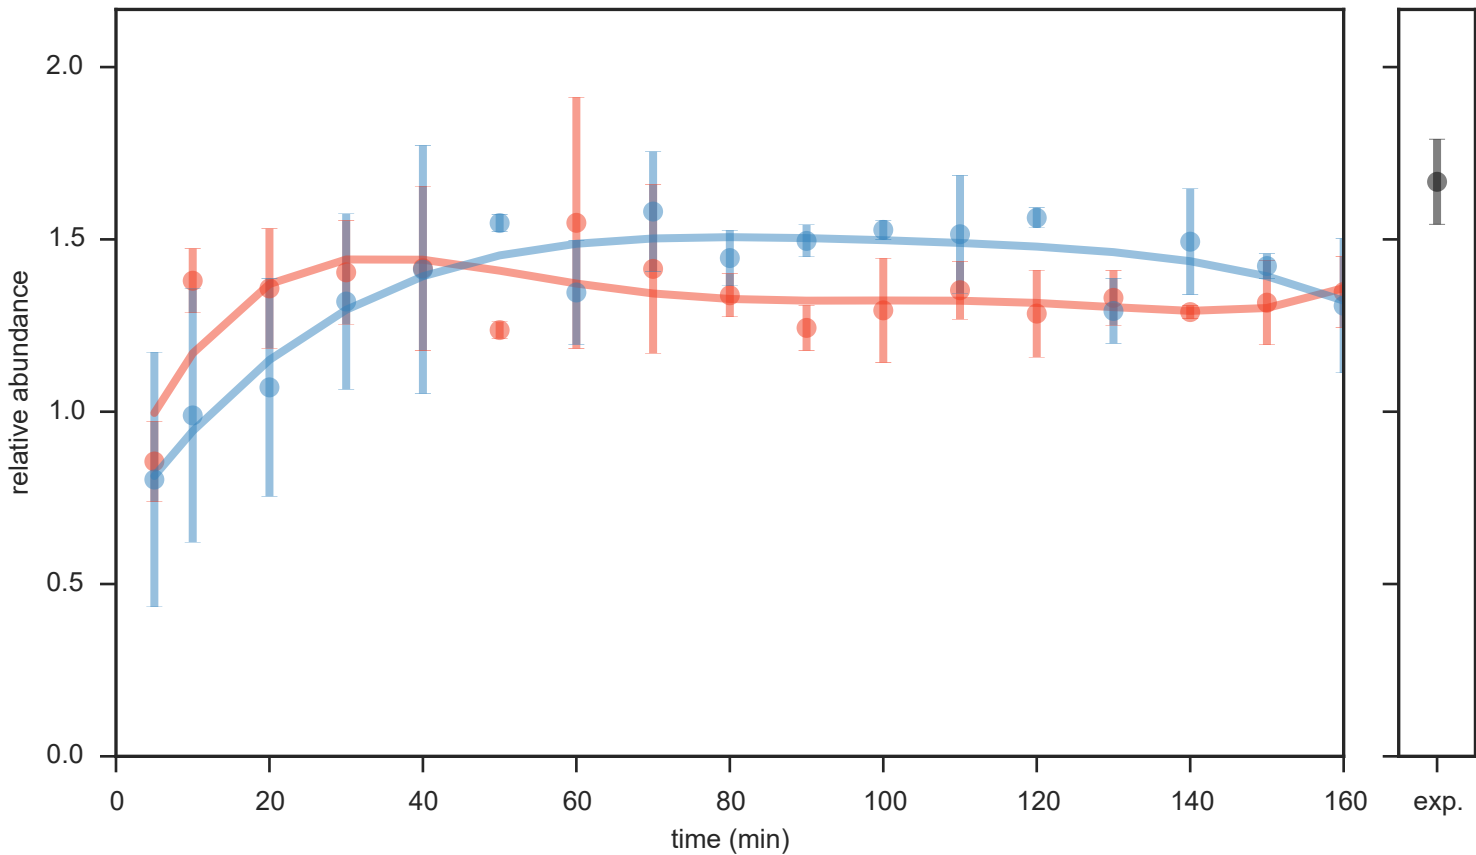

idms\_pid227\_mz290.96

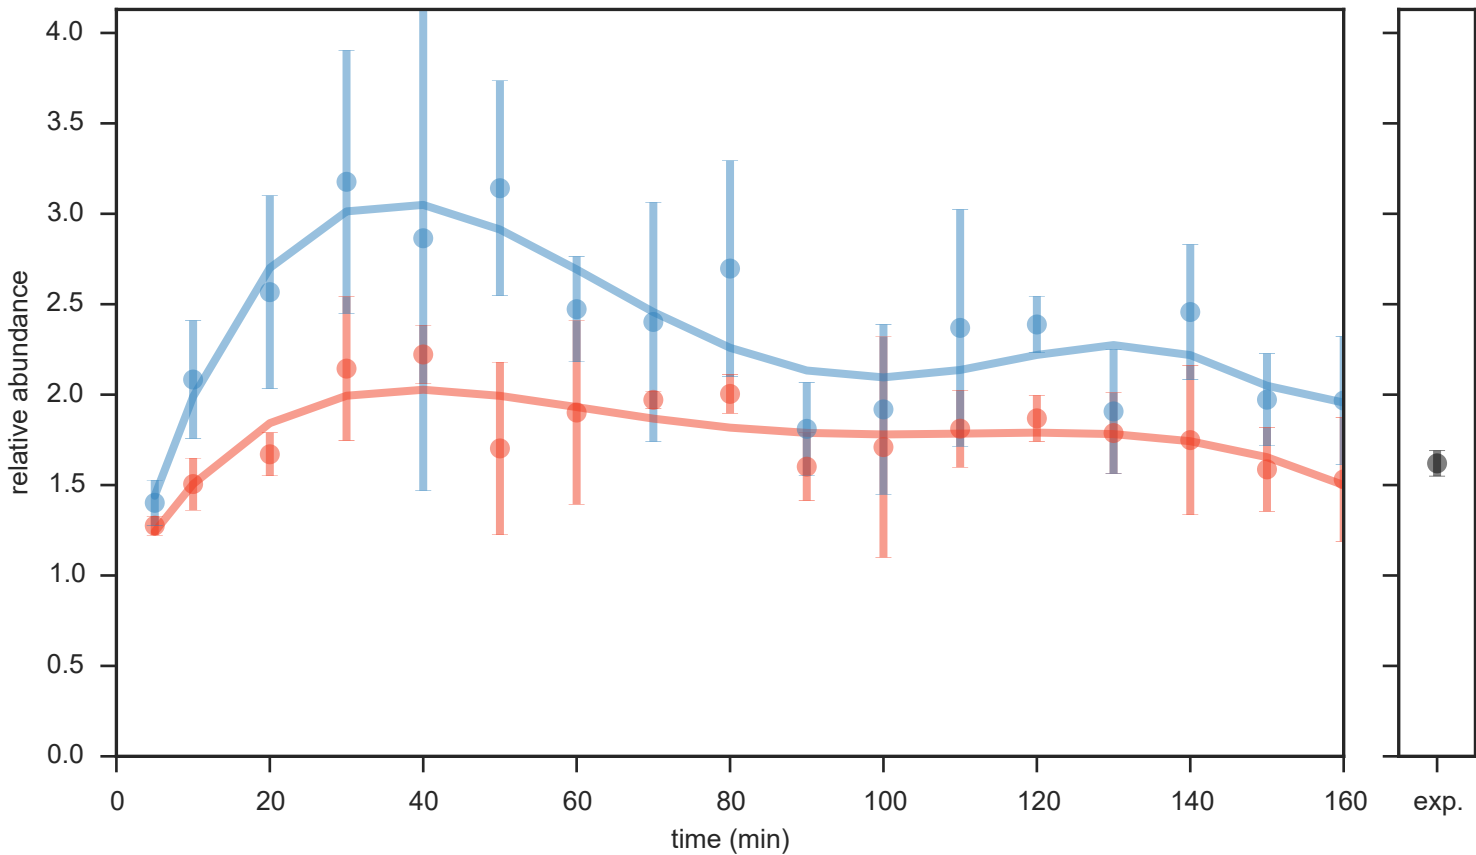

idms\_pid229\_mz189.08

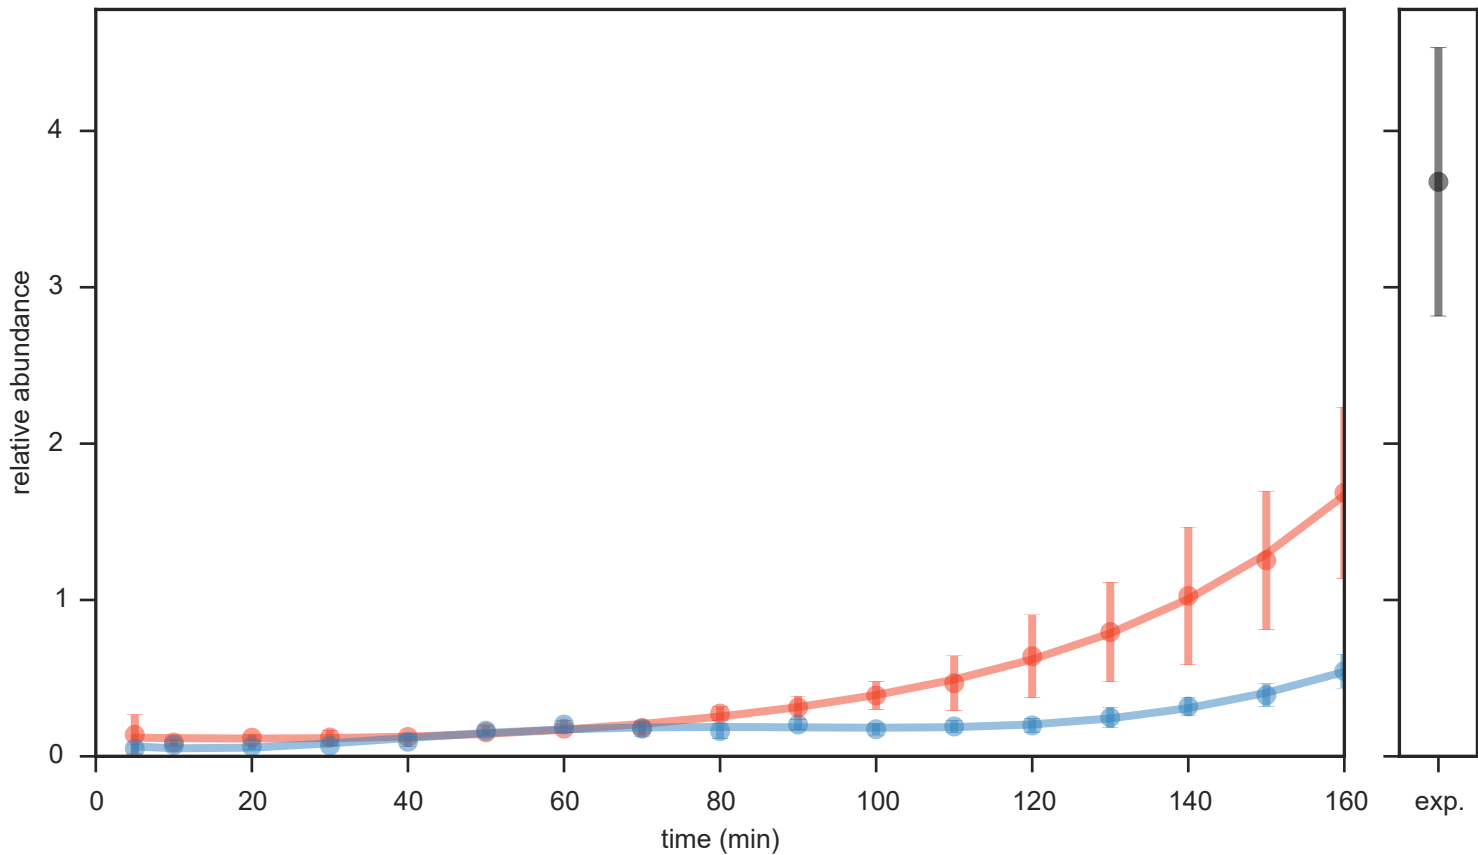

idms\_pid235\_mz226.94

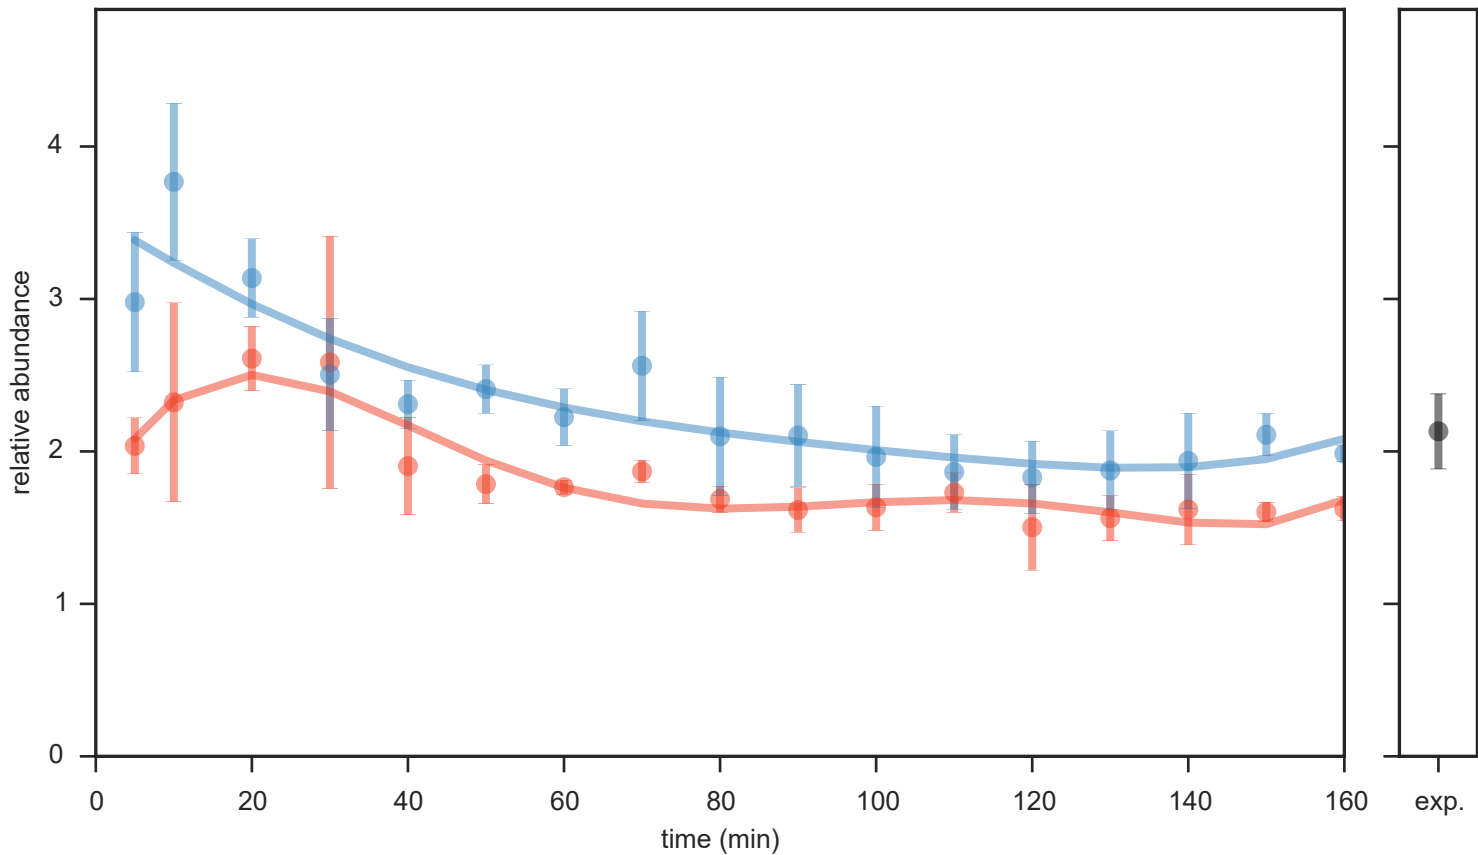

idms\_pid239\_mz318.97

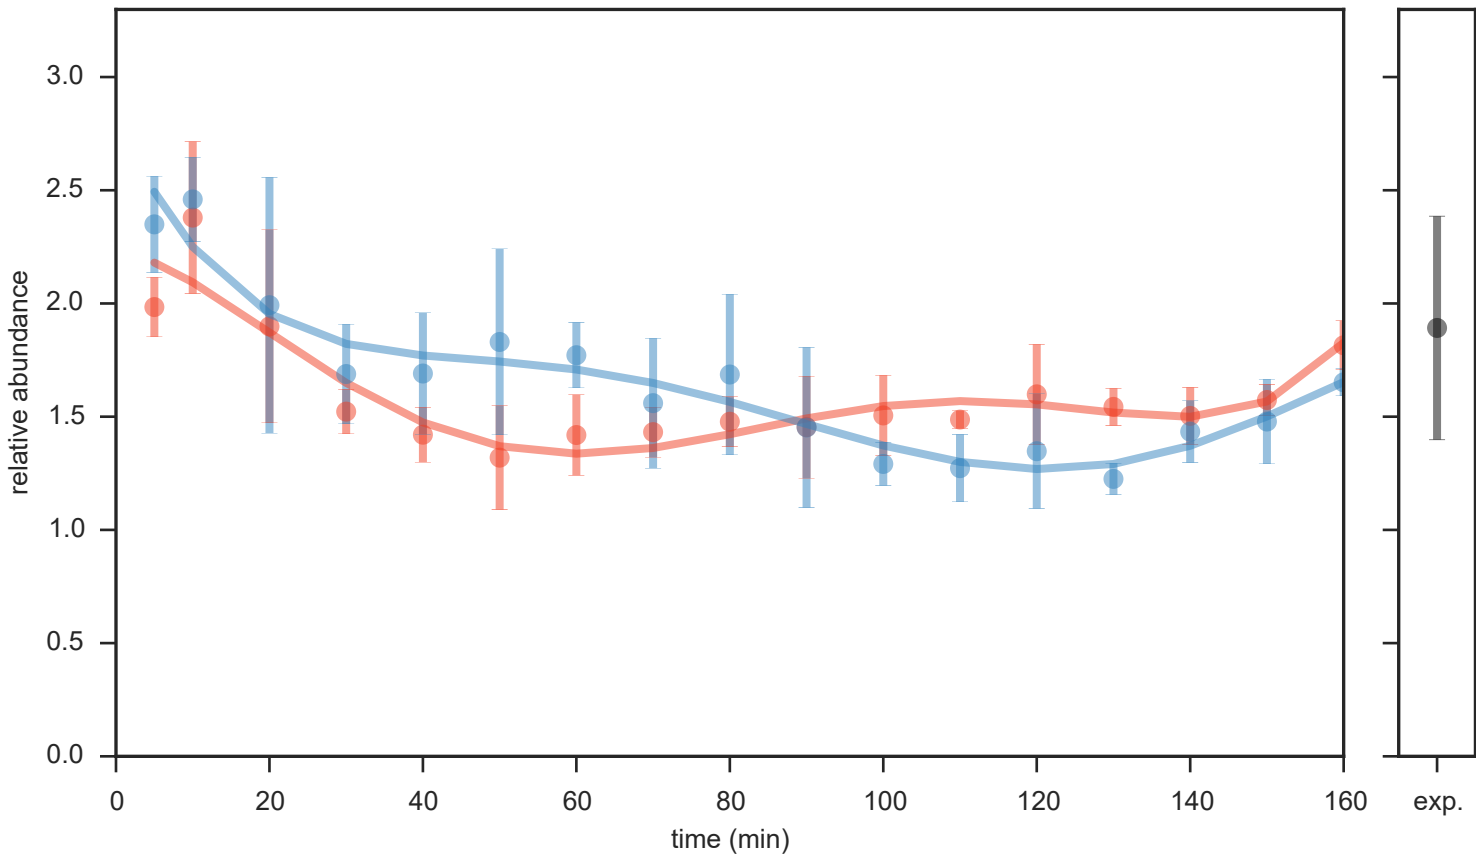

idms\_pid247\_mz338.54

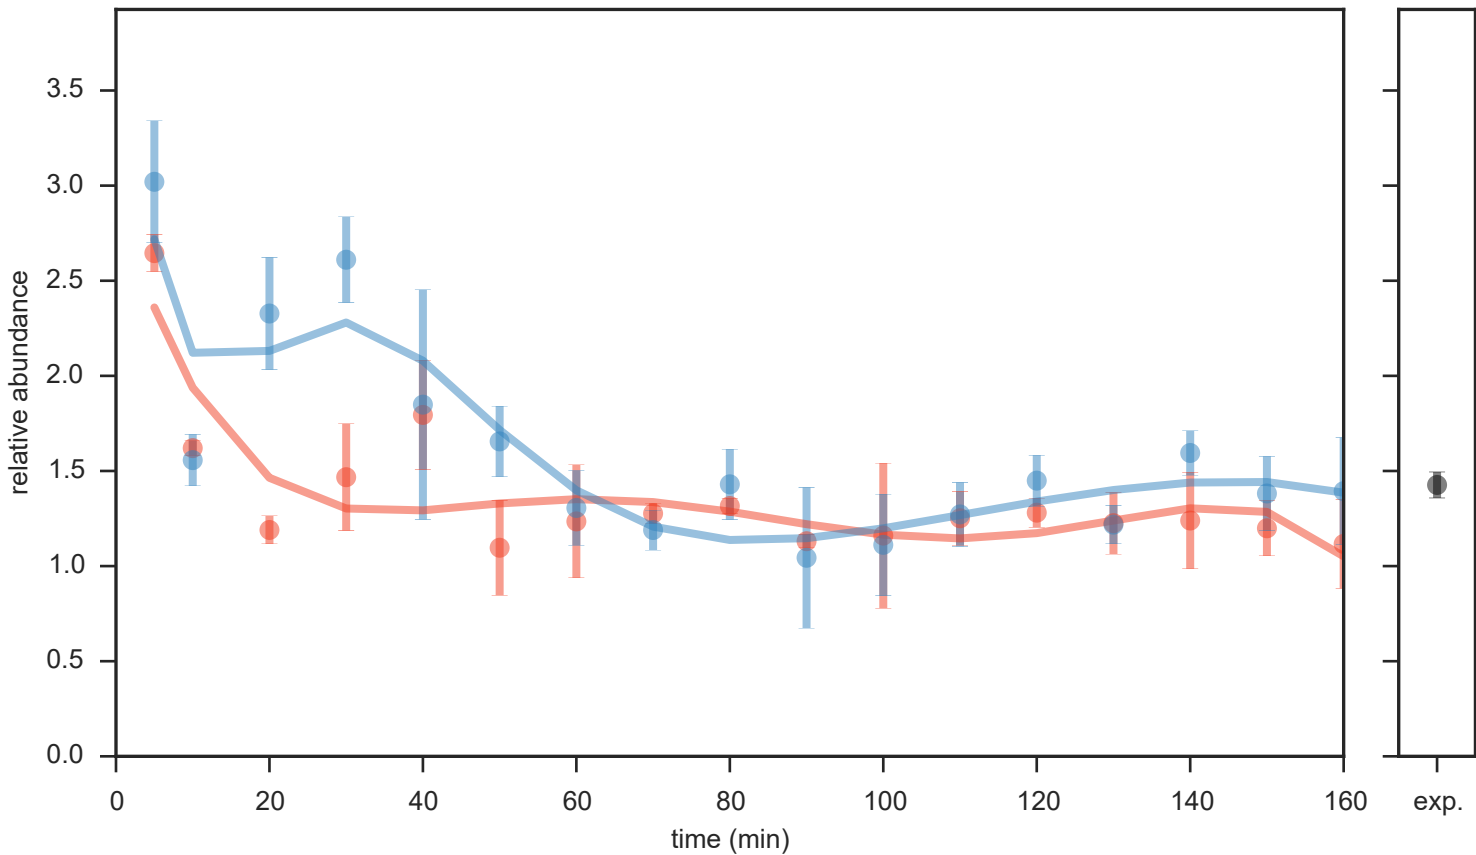

idms\_pid255\_mz409.55

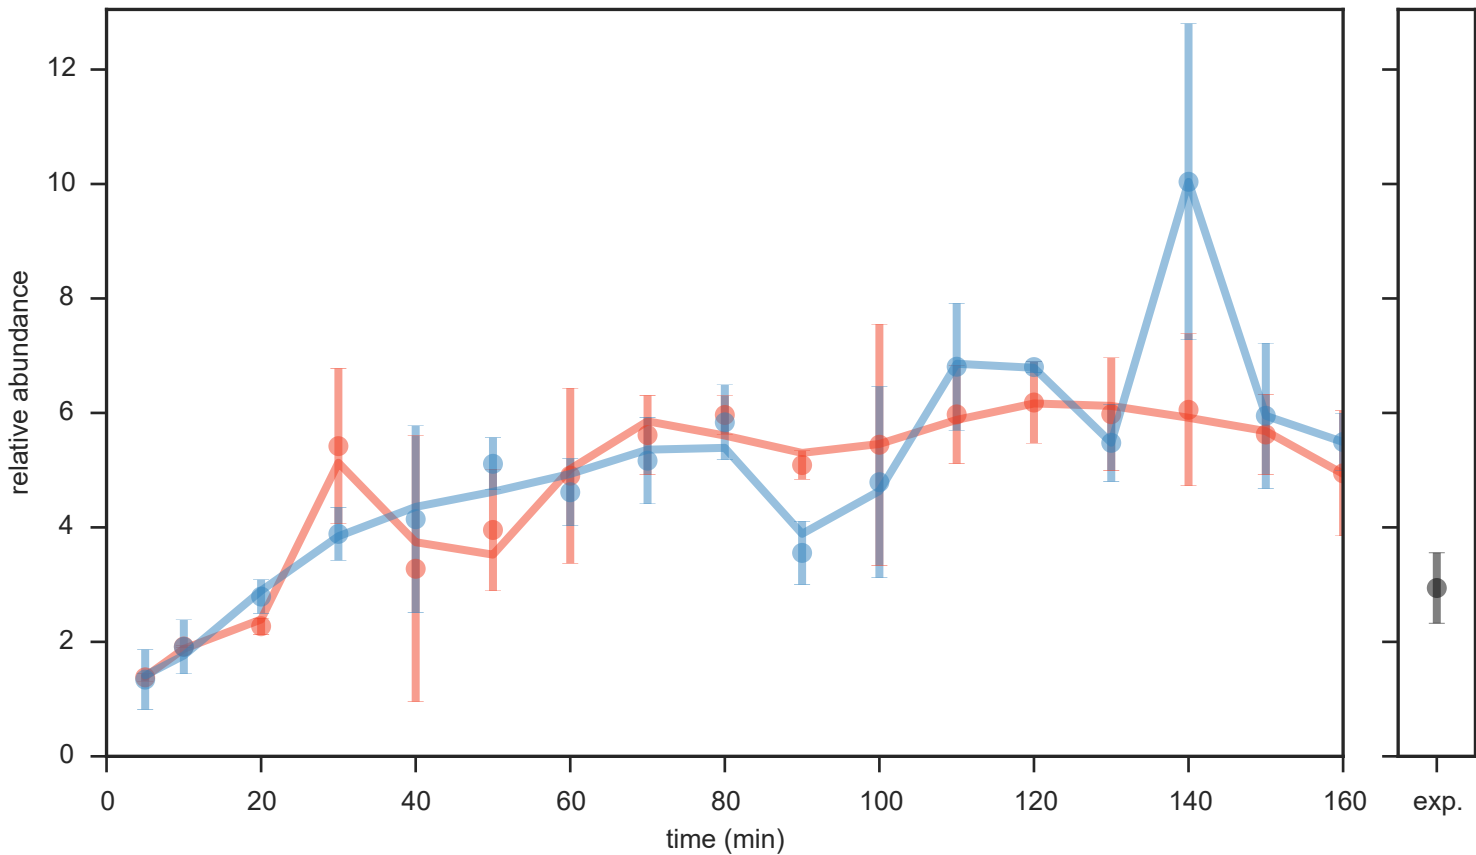



idms\_pid261\_mz200.00

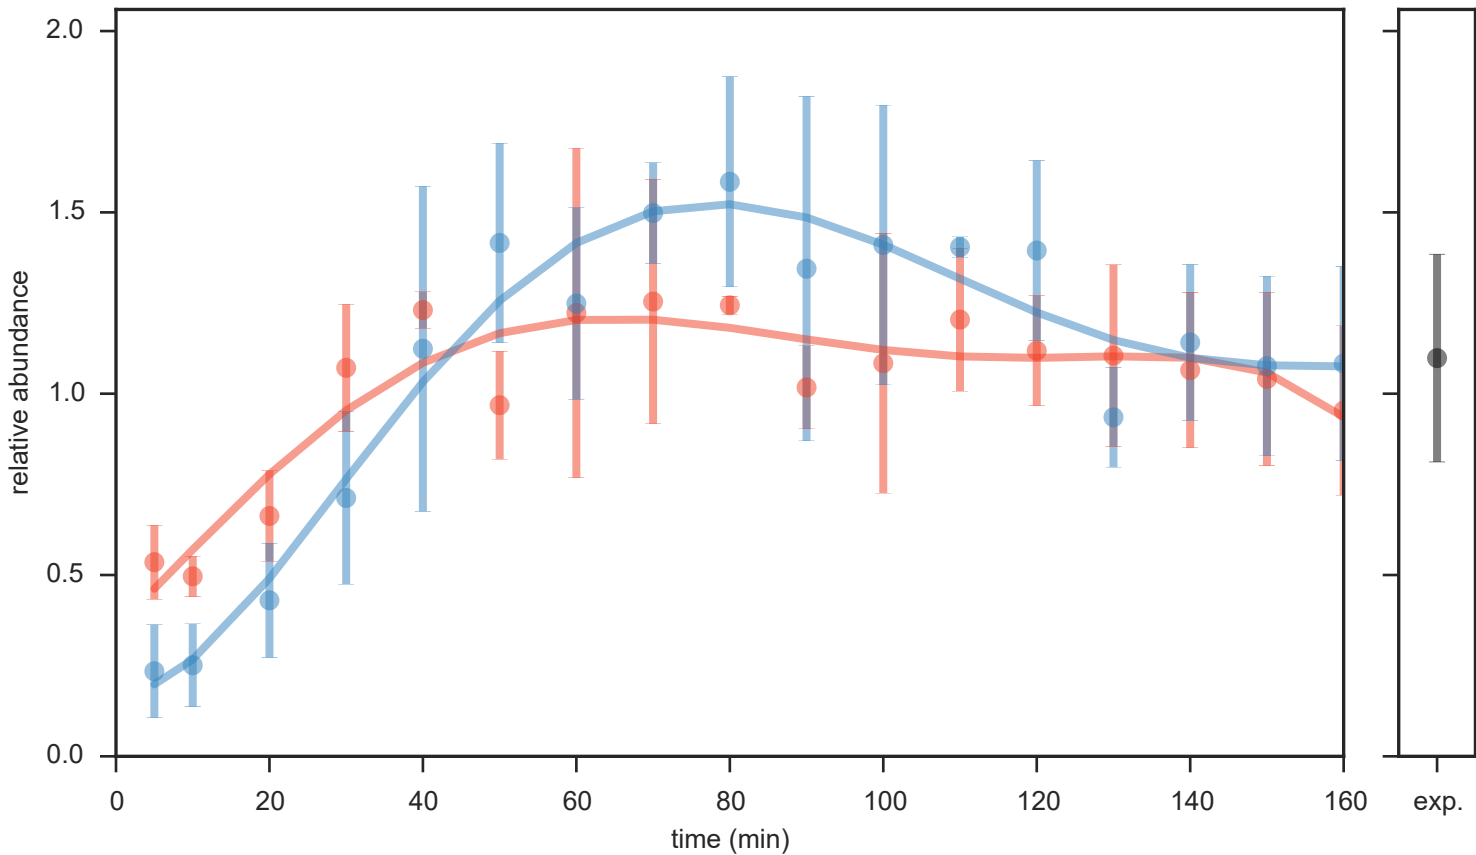

idms\_pid264\_mz282.03

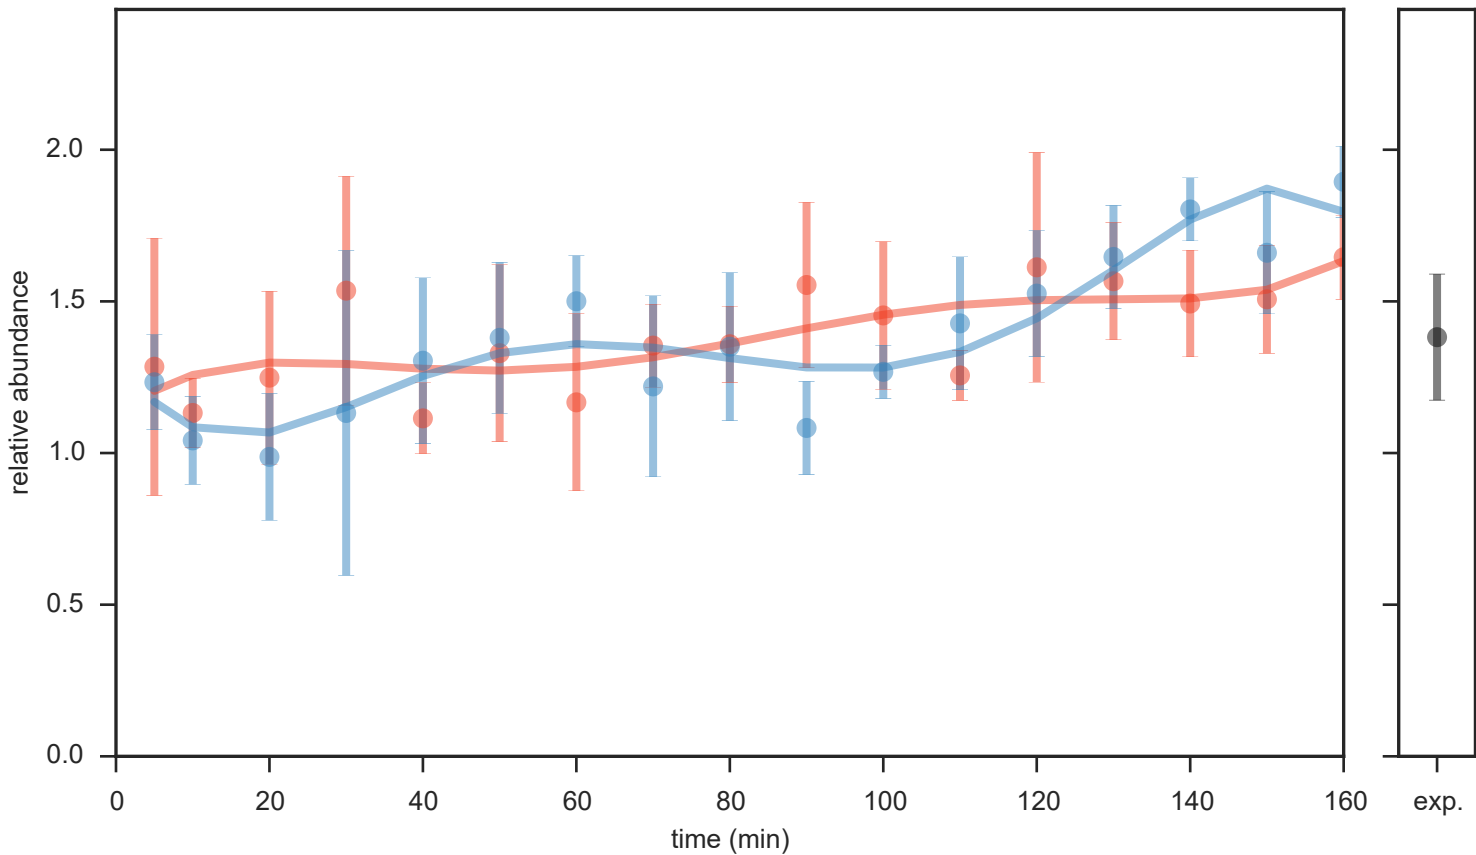

idms\_pid271\_mz296.96

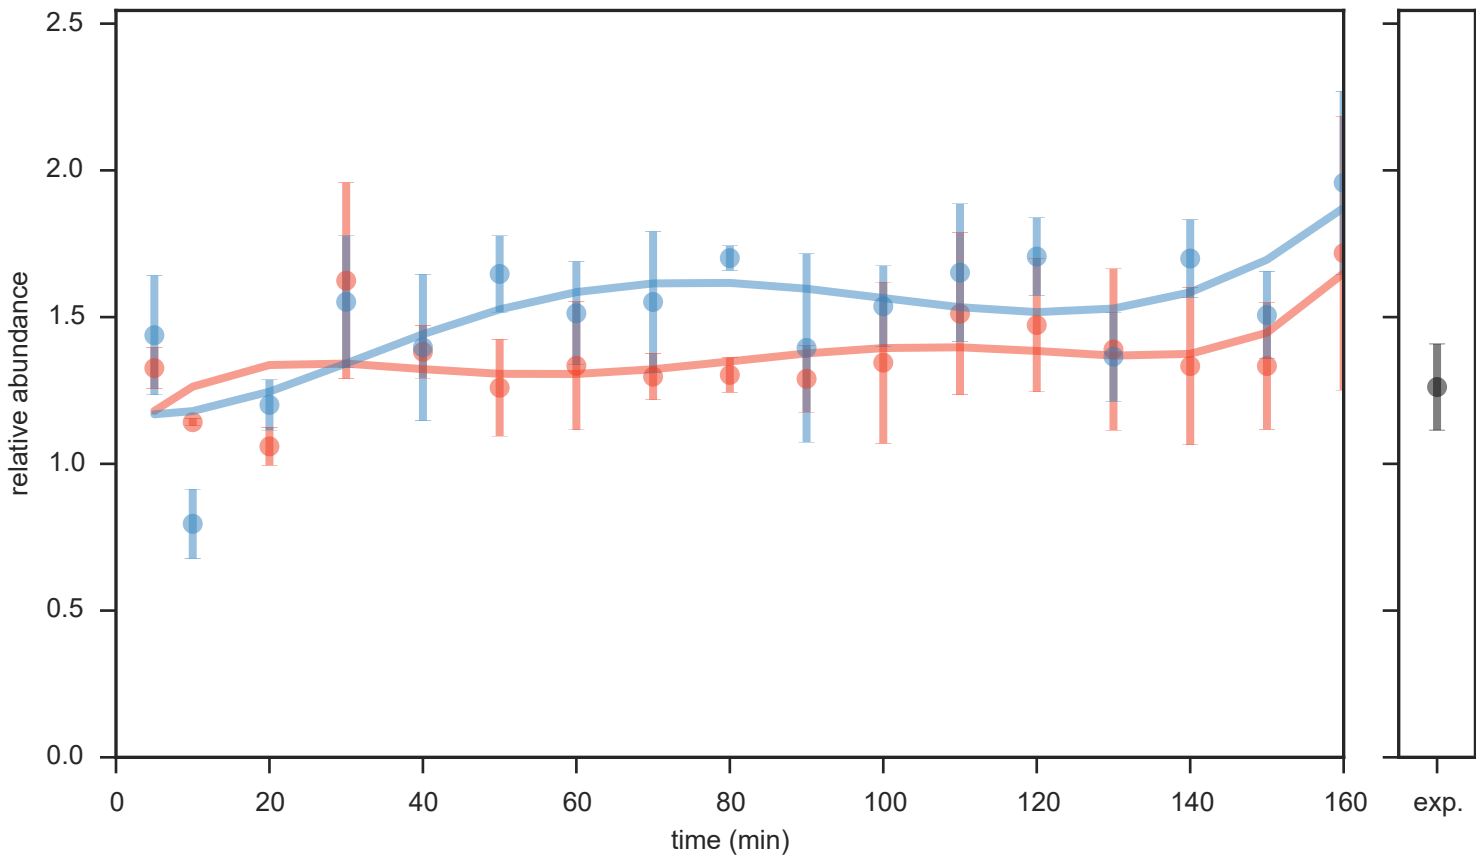

idms\_pid277\_mz133.01

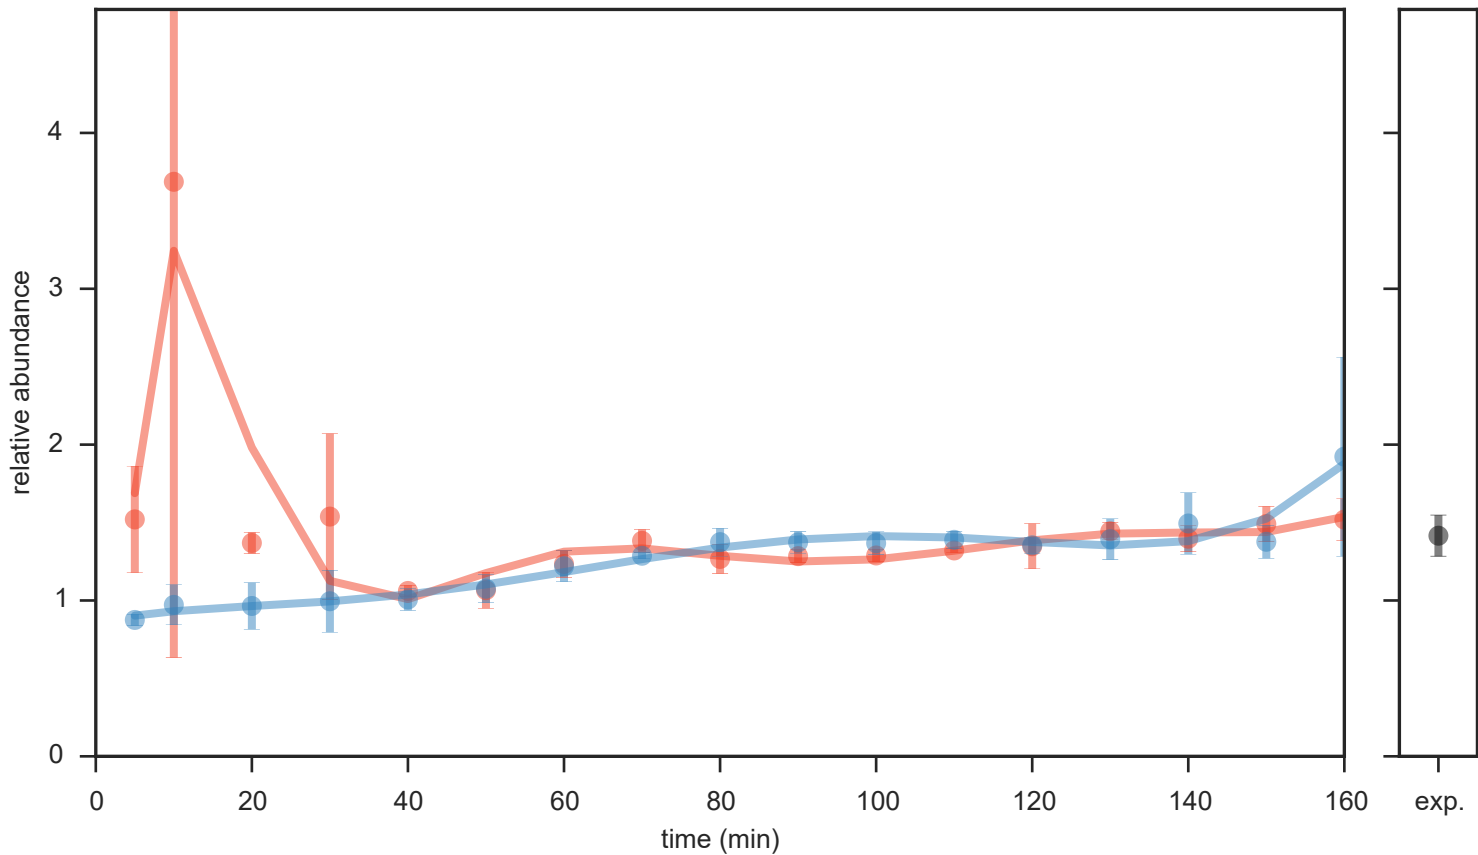

idms\_pid279\_mz346.05

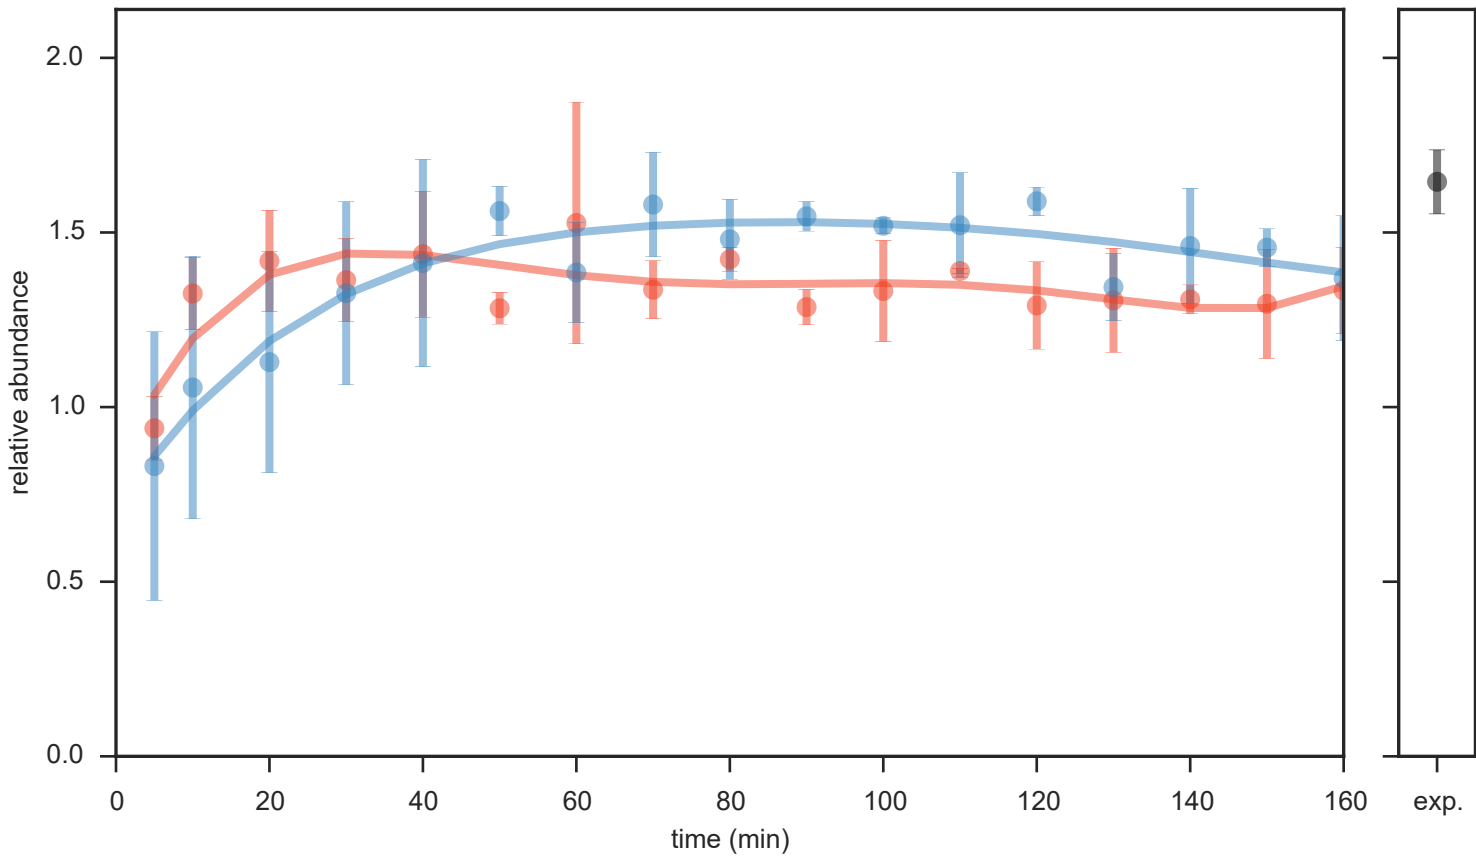

idms\_pid285\_mz259.74

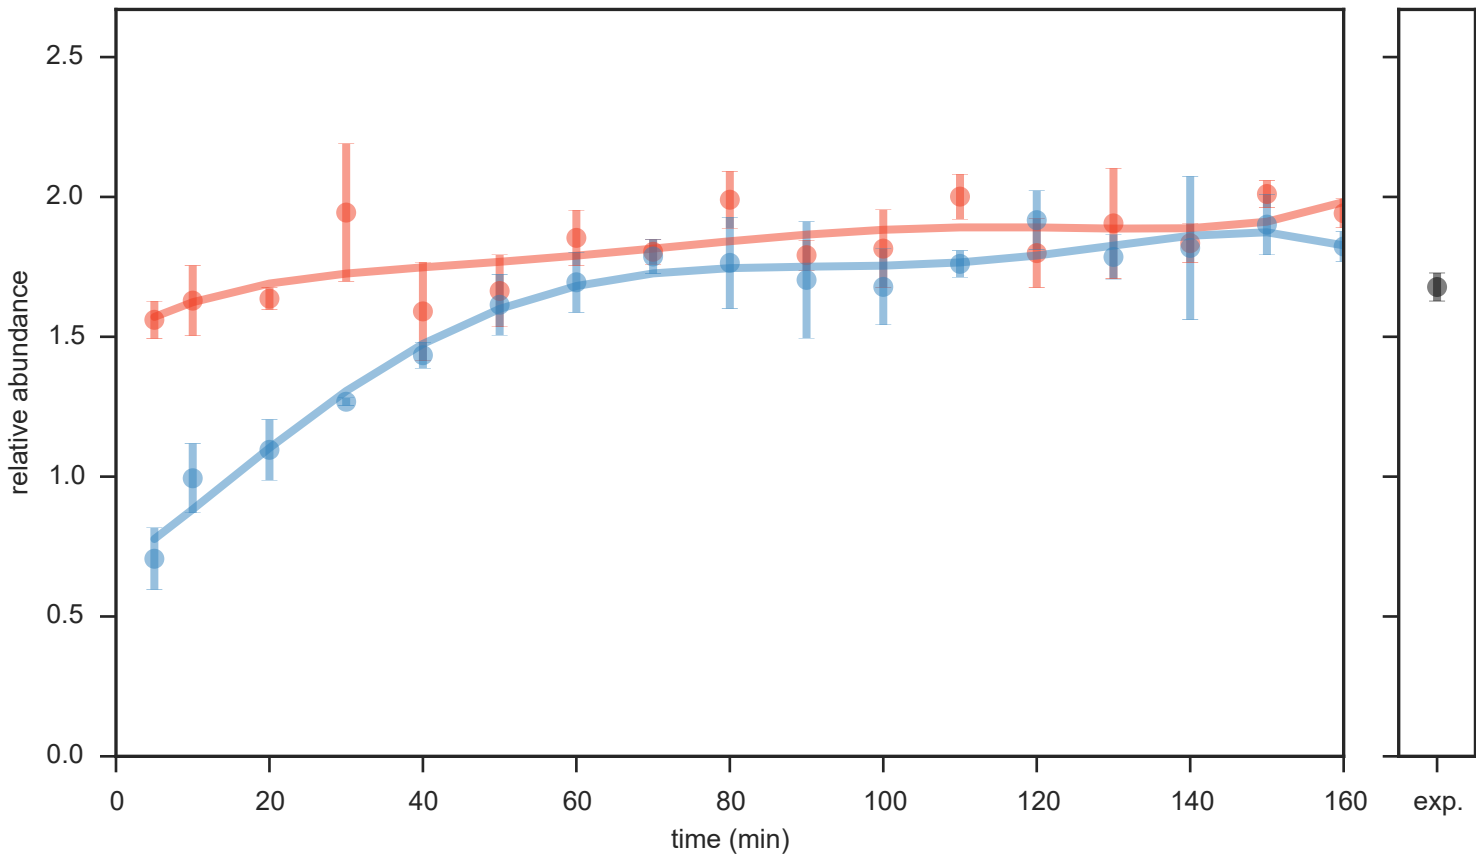

idms\_pid286\_mz258.53

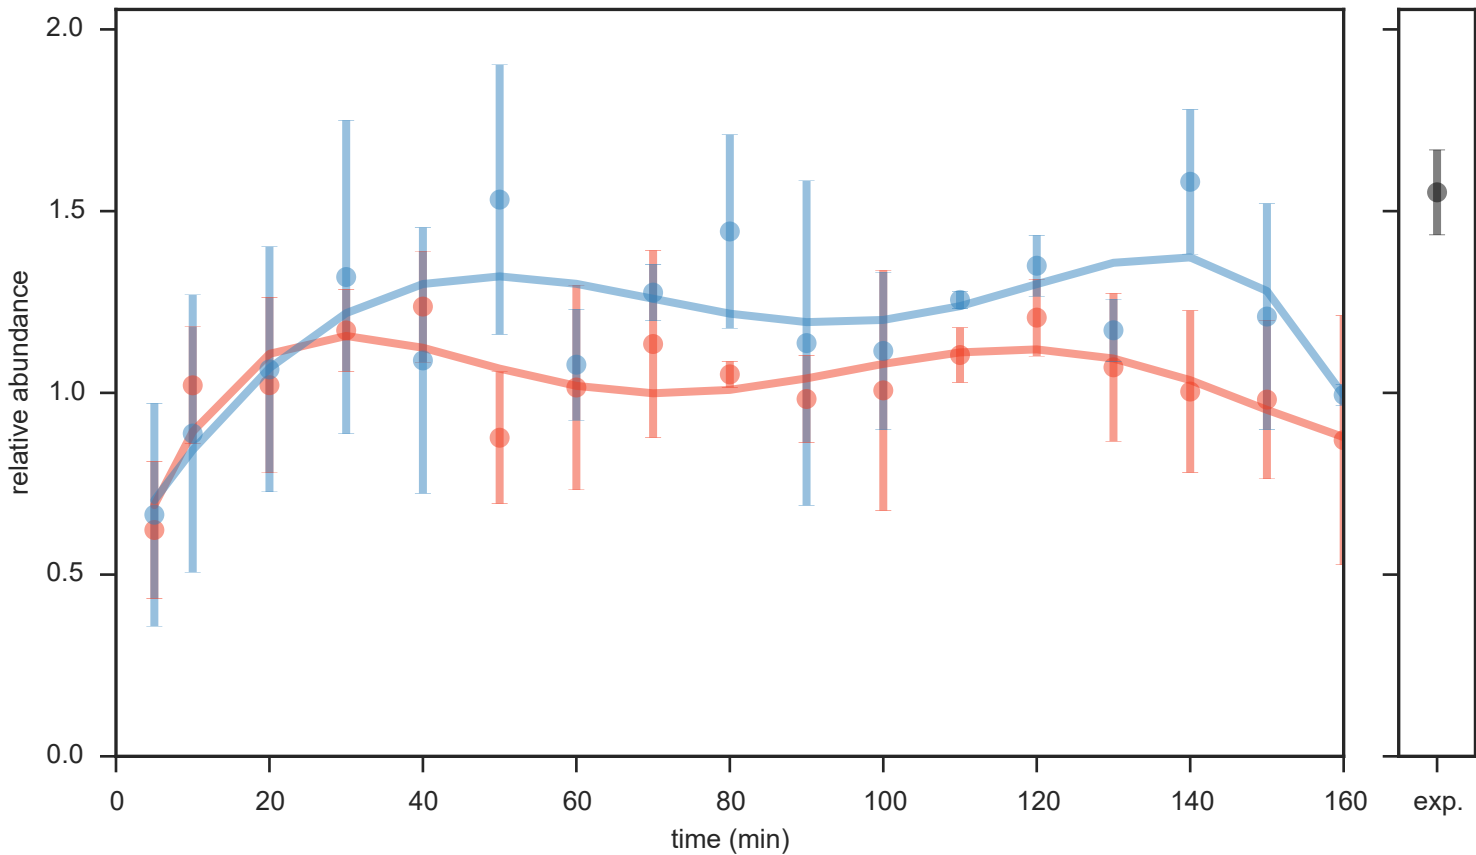

idms\_pid289\_mz459.68

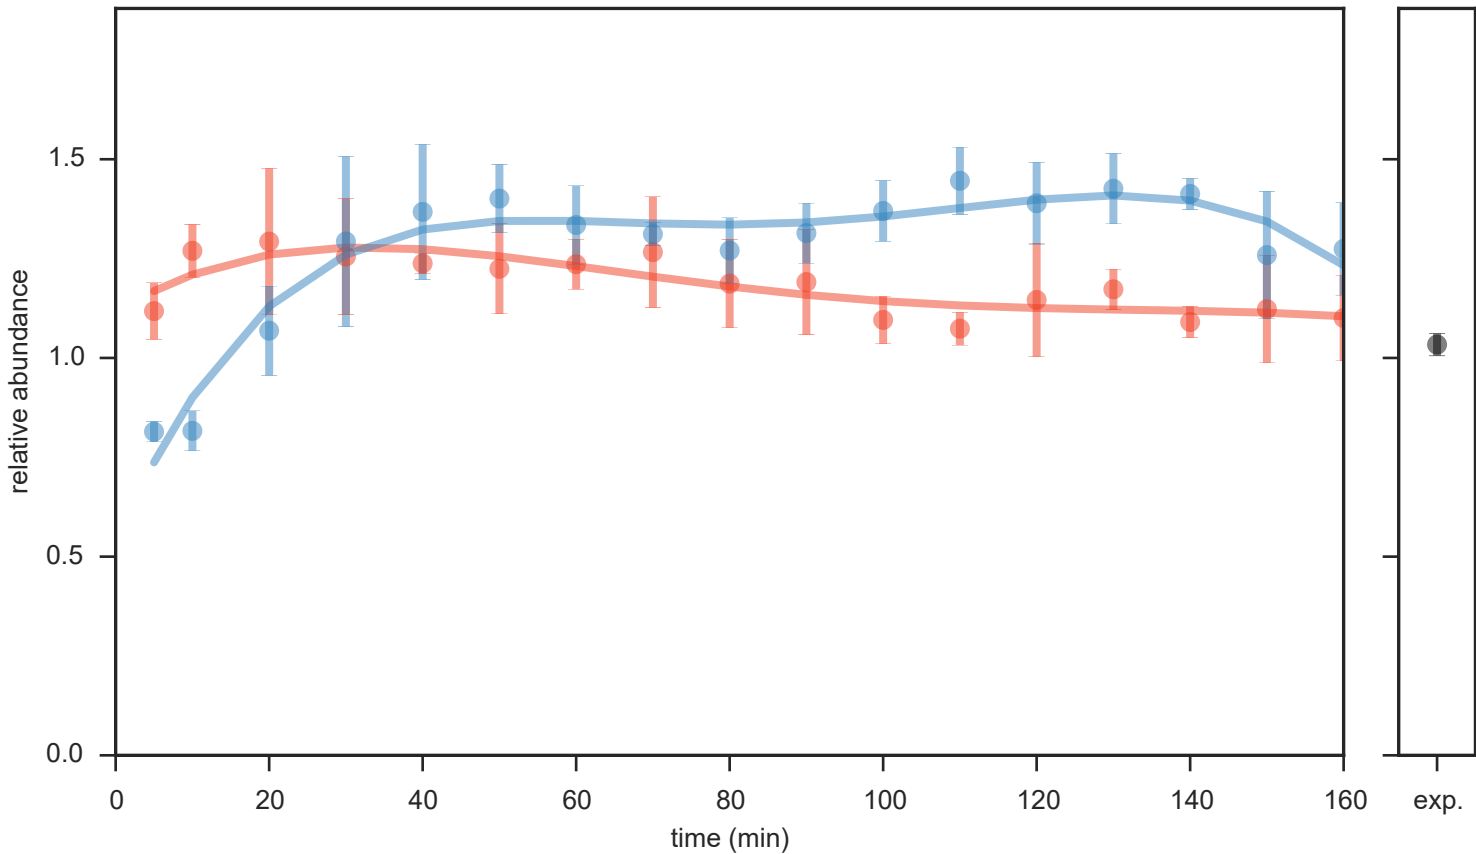



idms\_pid293\_mz261.07

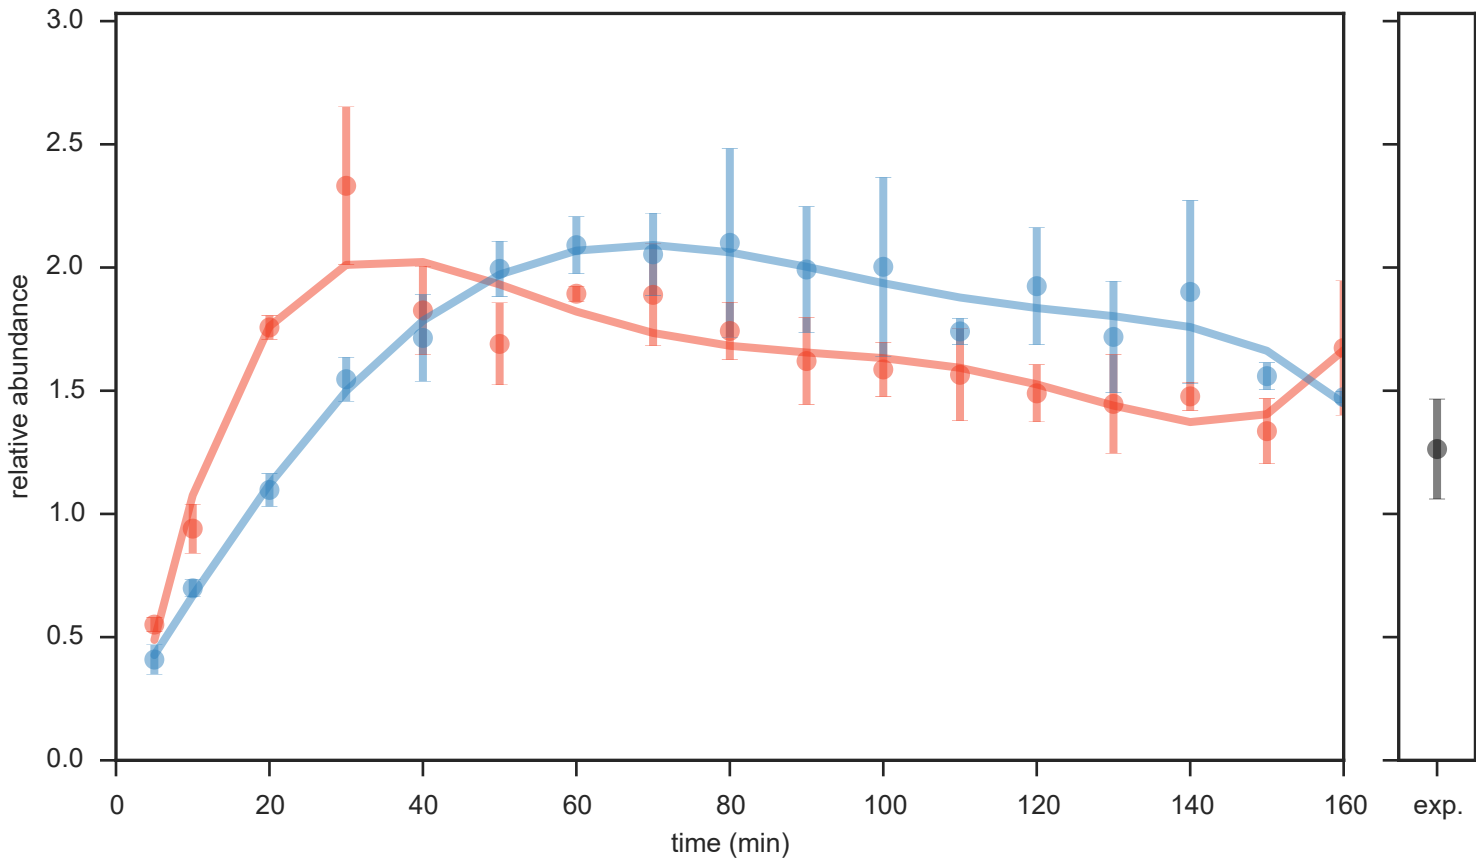

idms\_pid299\_mz214.01

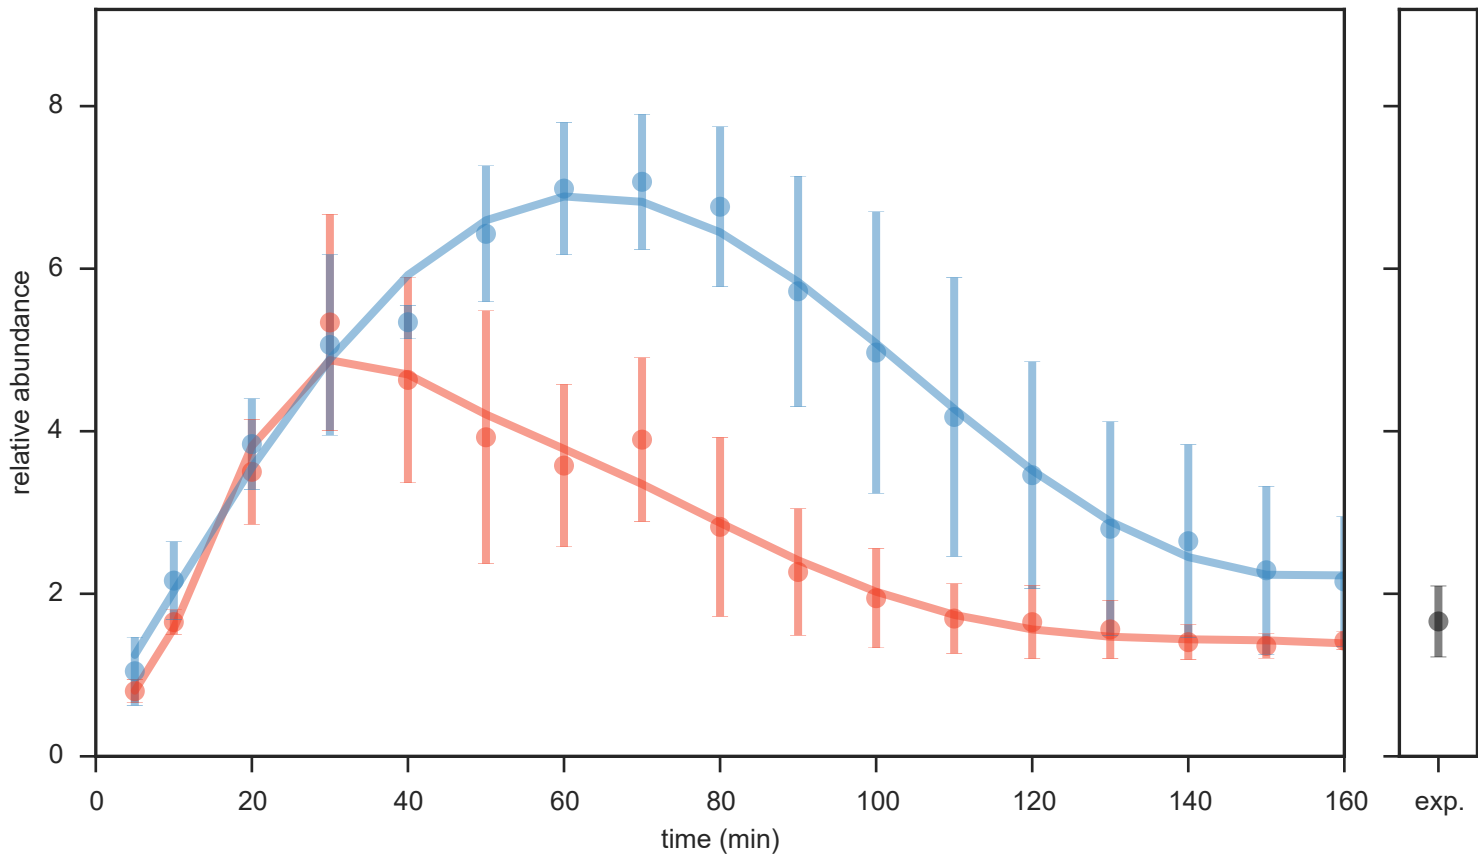

idms\_pid304\_mz206.94

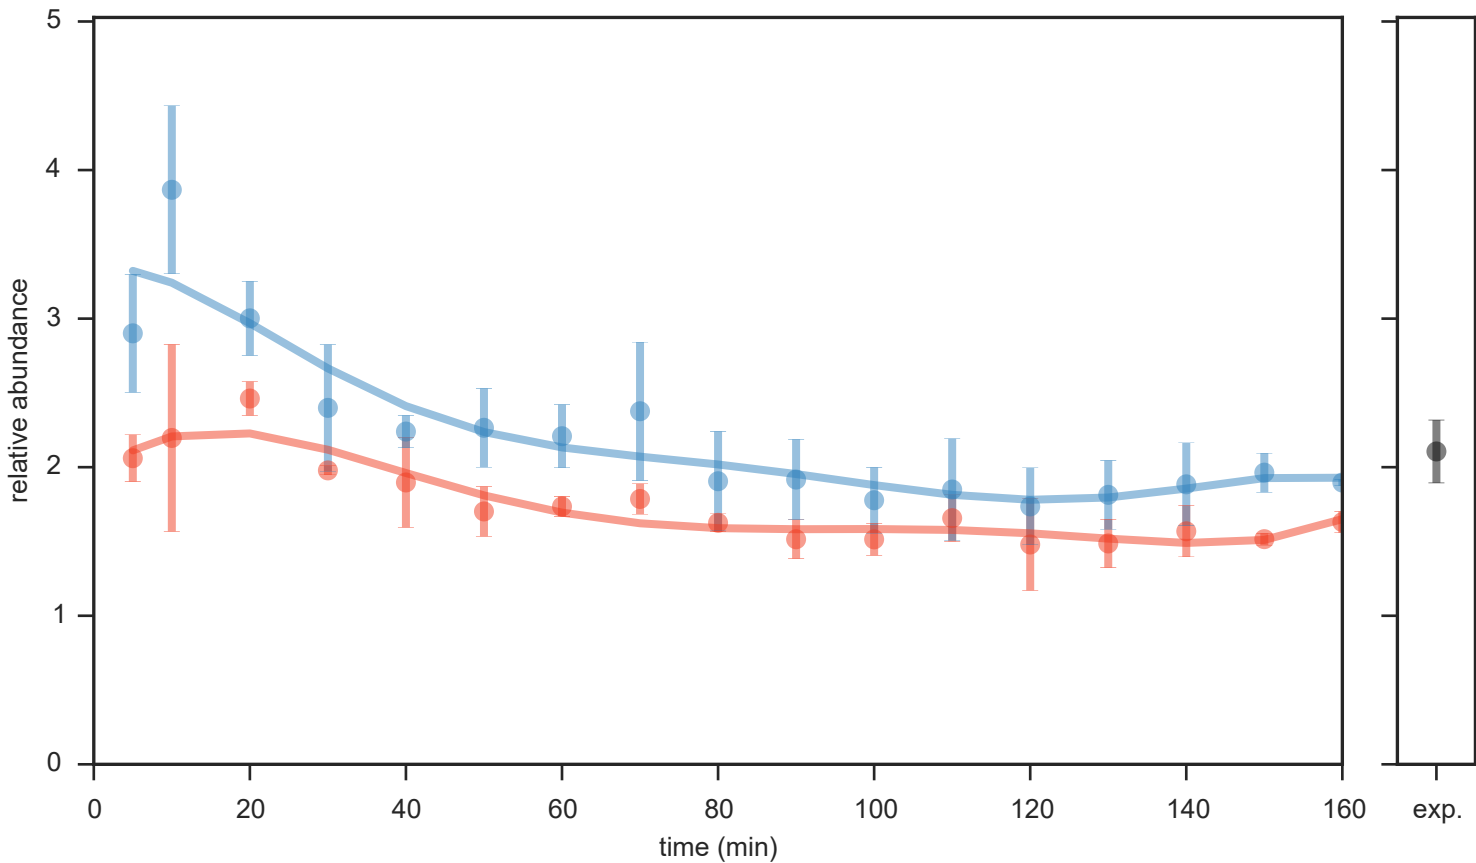

idms\_pid311\_mz274.09

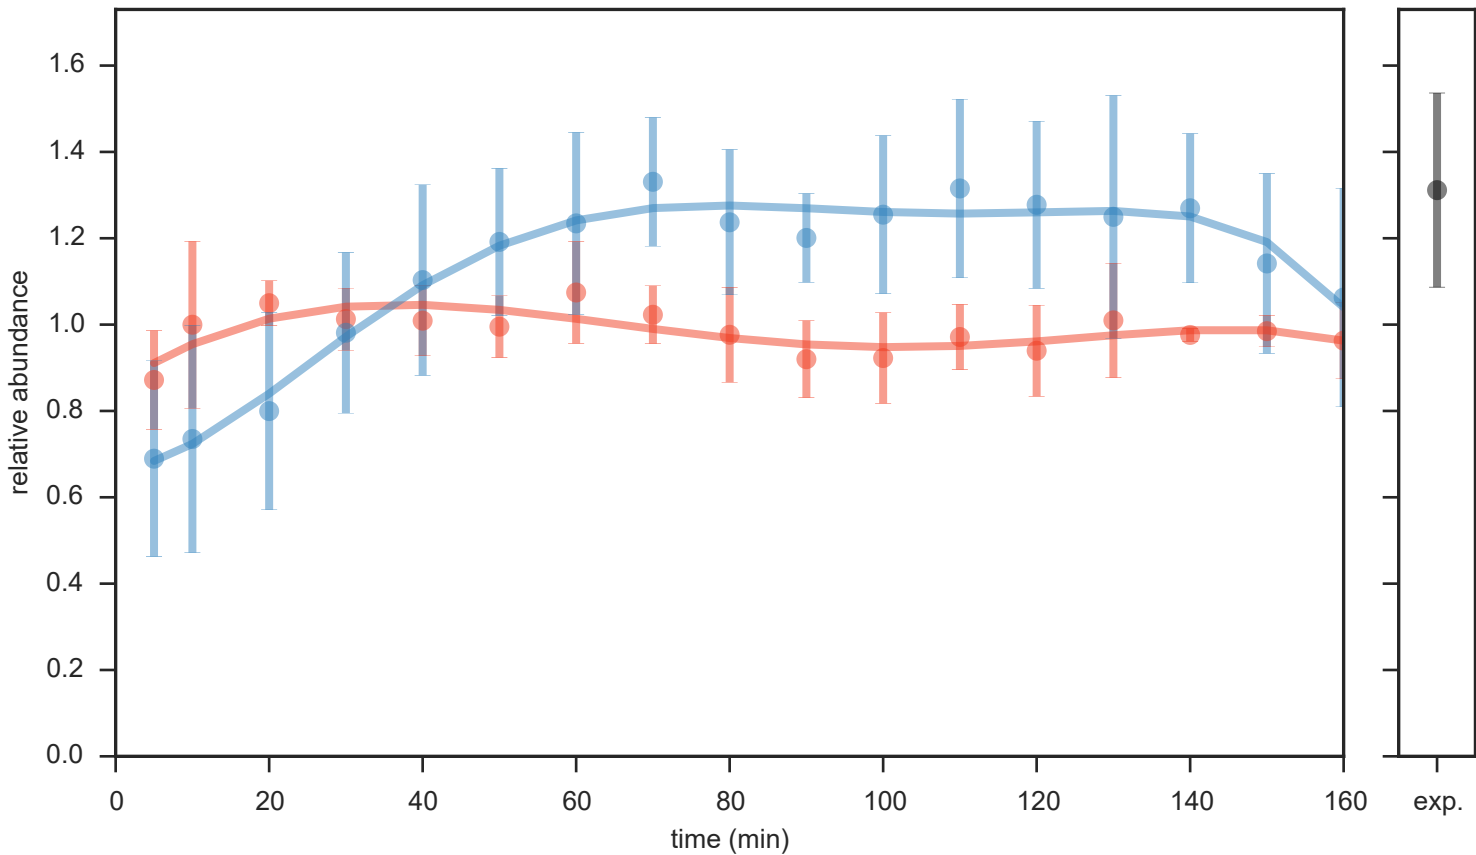

idms\_pid316\_mz344.03

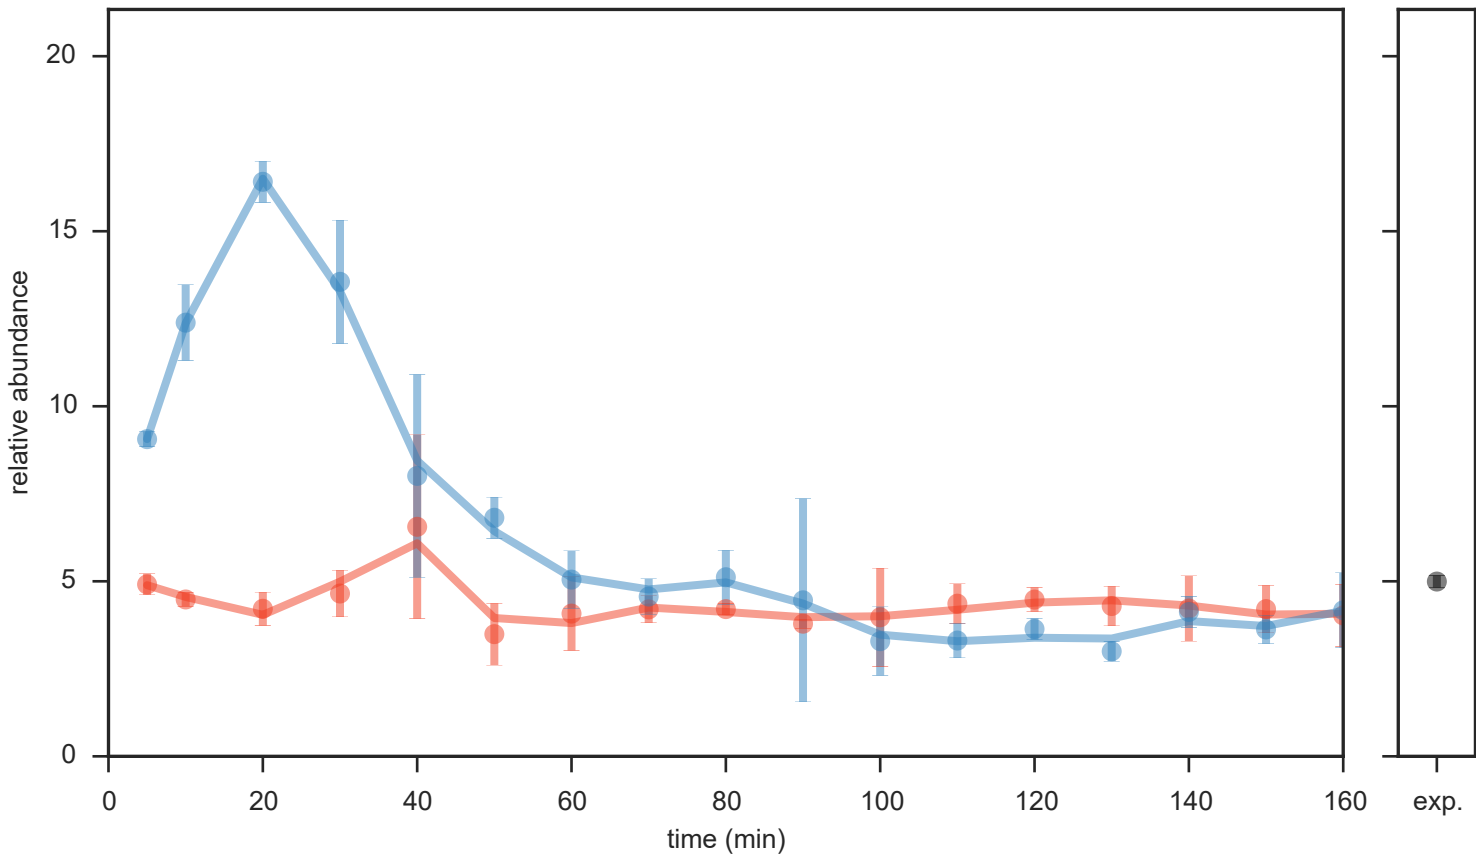

idms\_pid317\_mz289.03

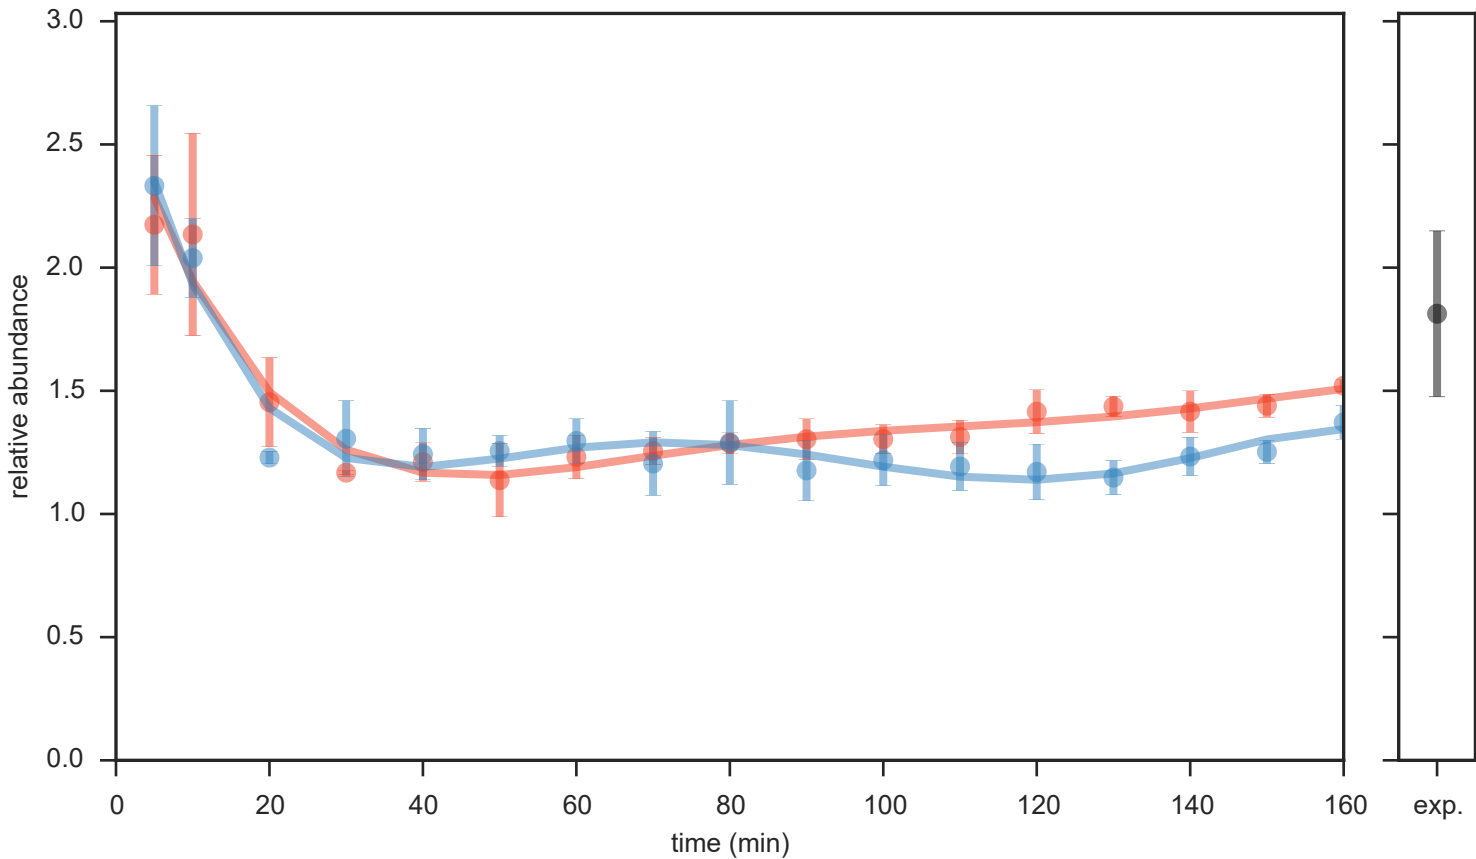

idms\_pid319\_mz282.01

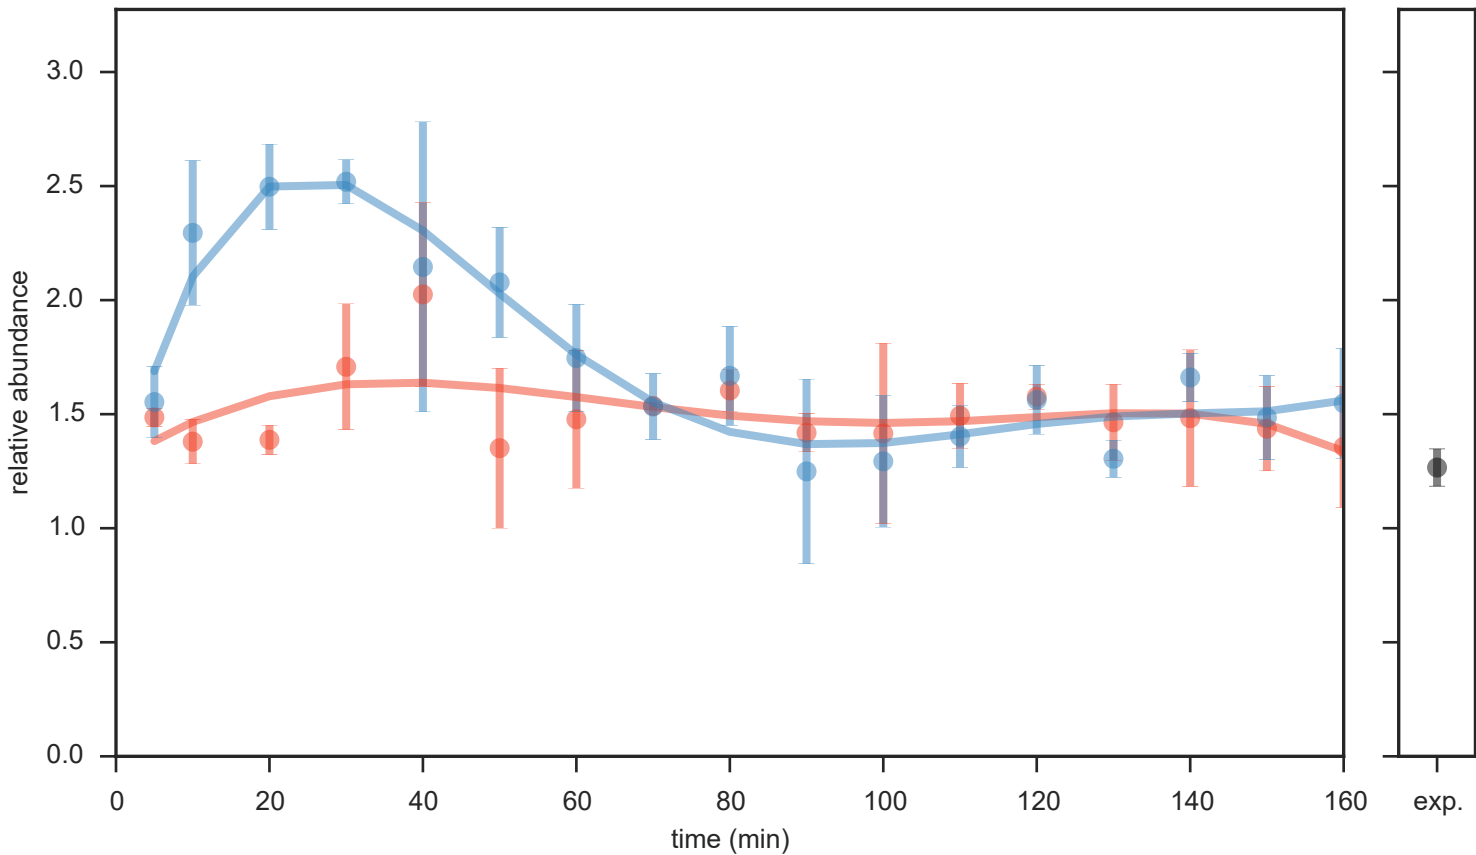

idms\_pid329\_mz189.50

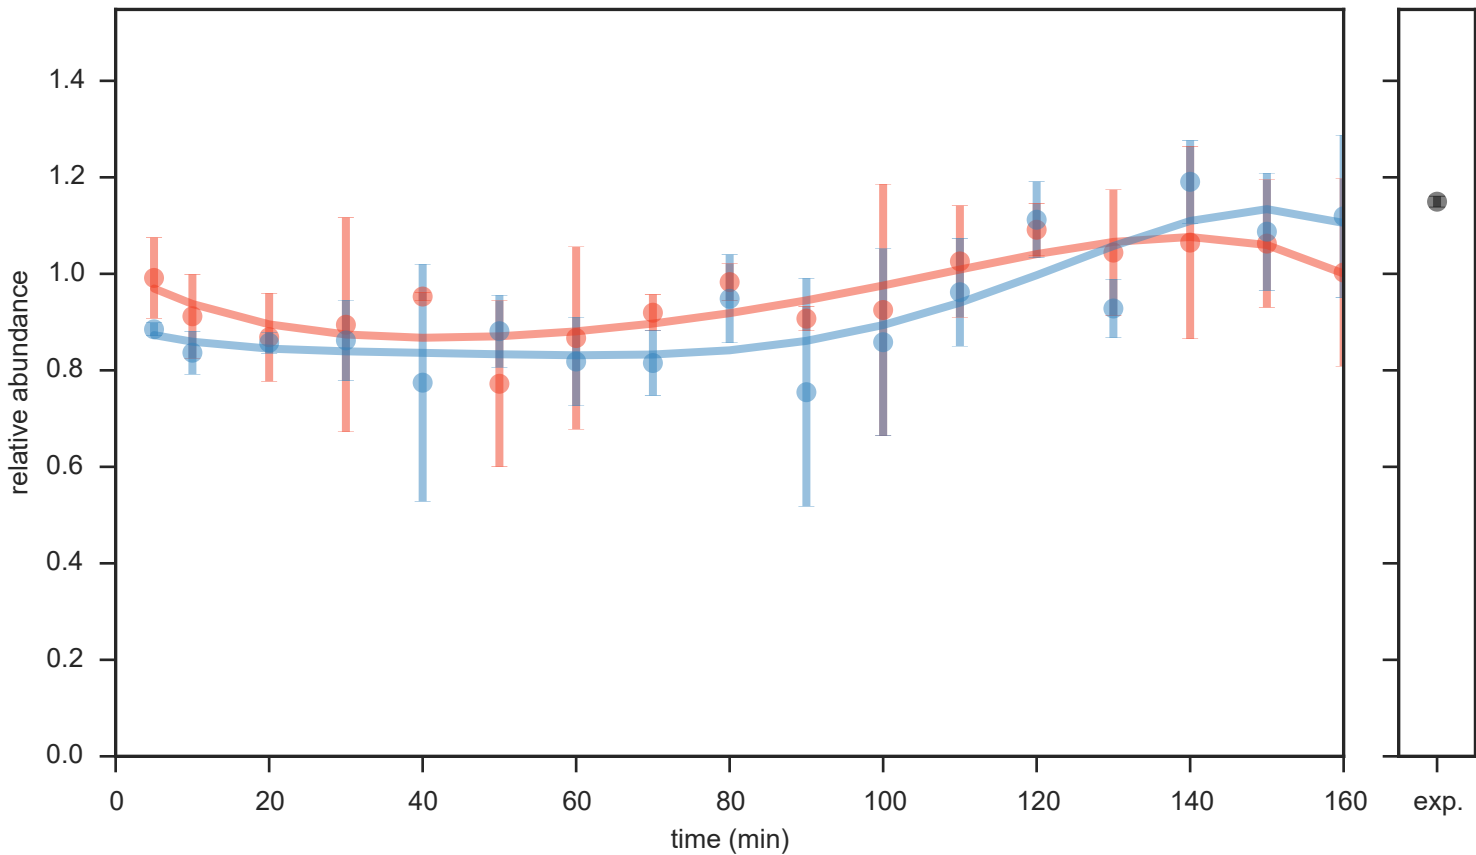



idms\_pid334\_mz523.99

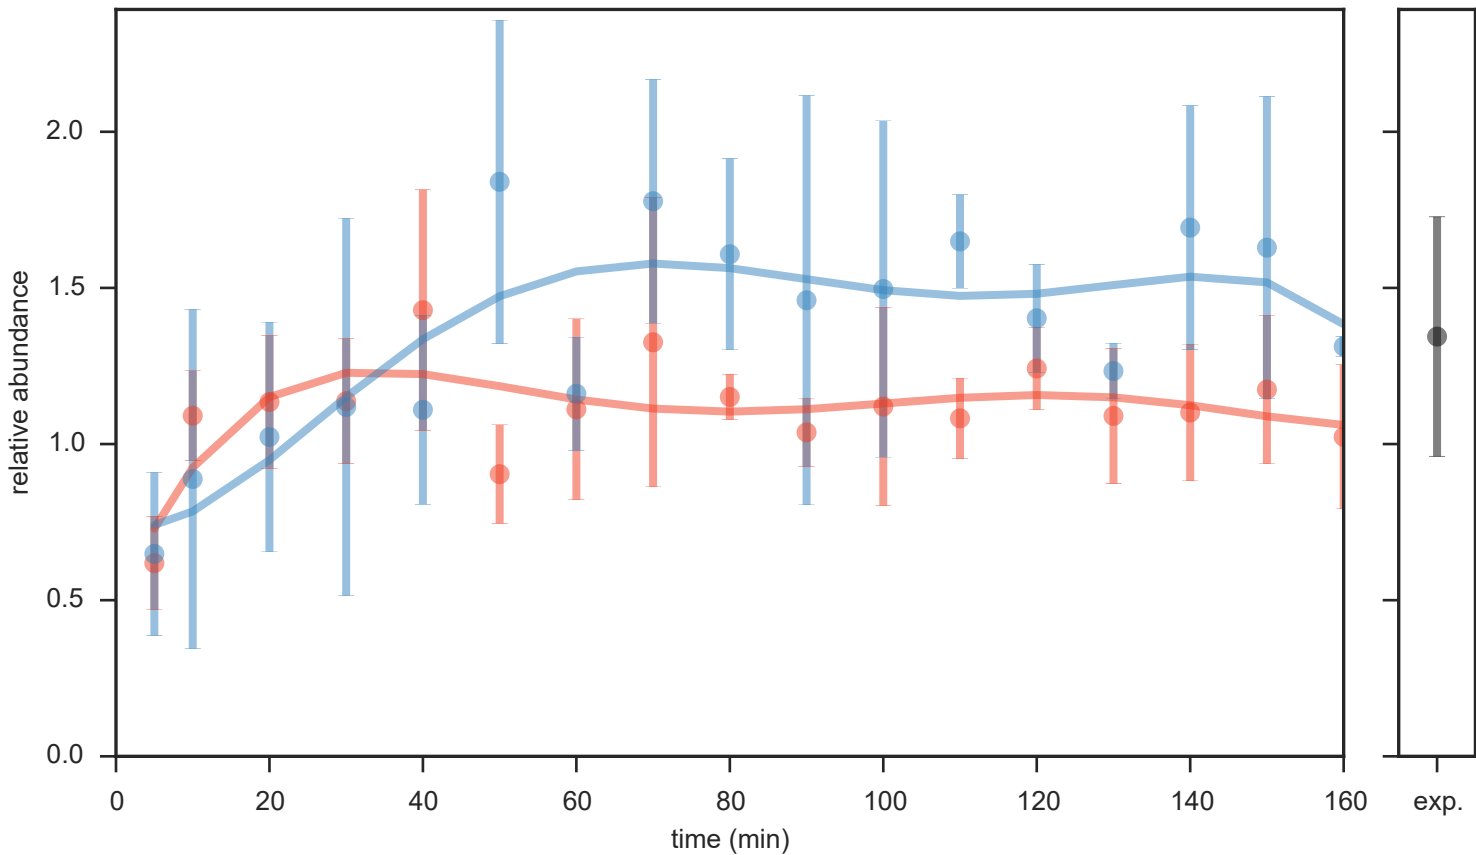

idms\_pid344\_mz469.12

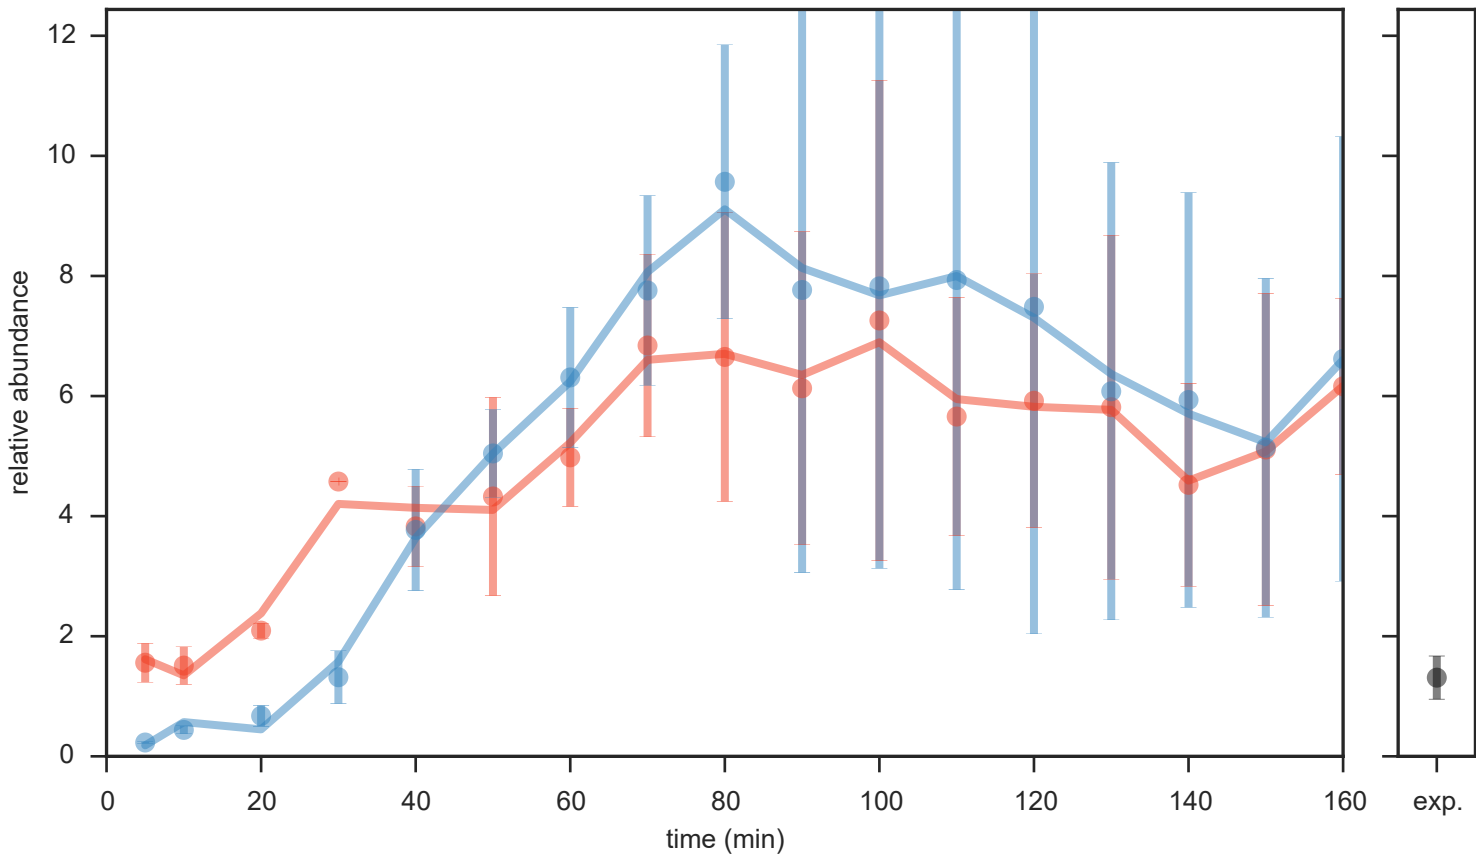

idms\_pid346\_mz230.52

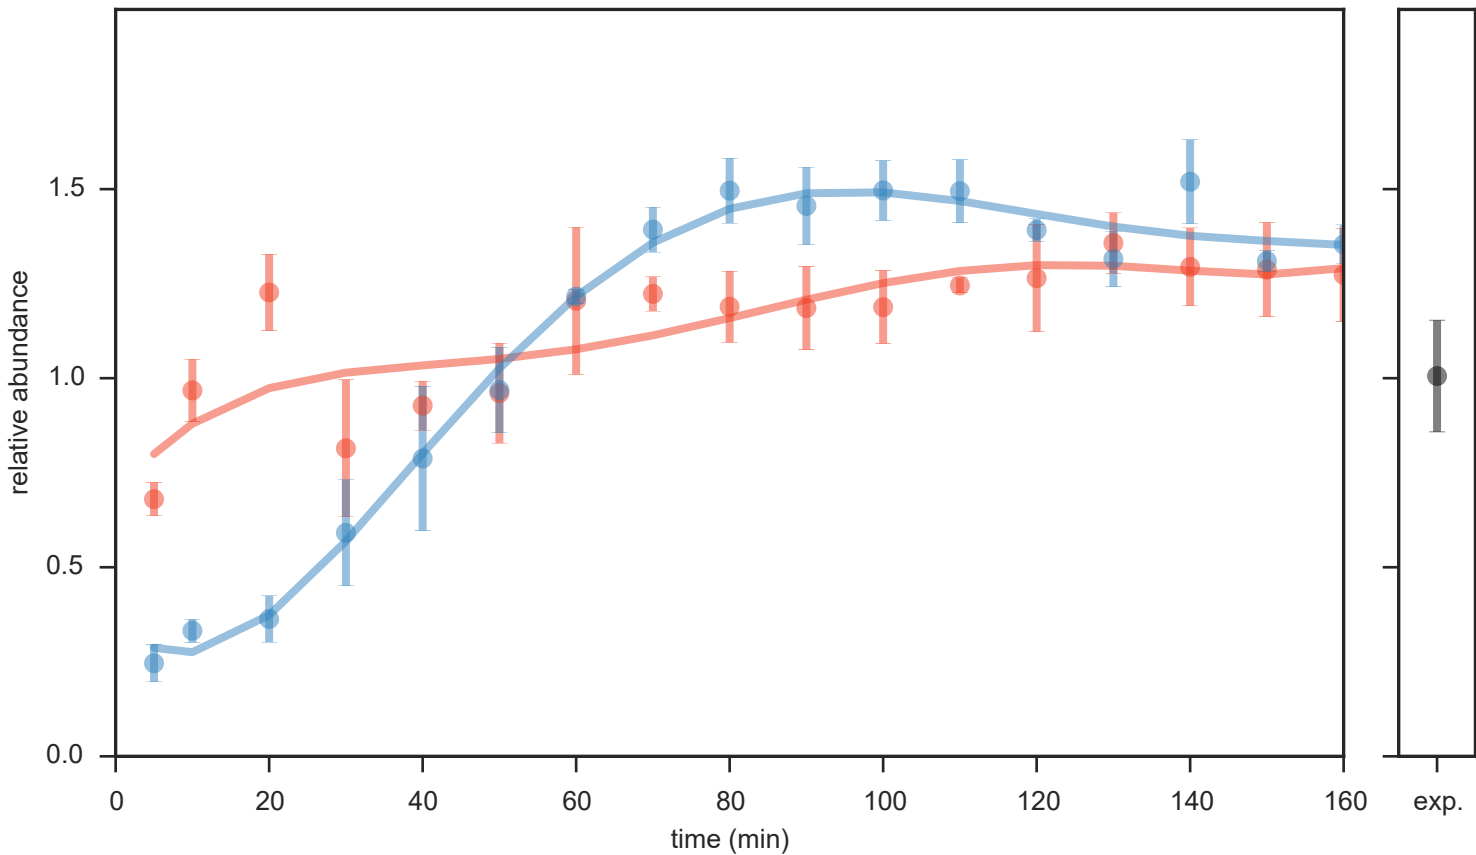

idms\_pid348\_mz294.96

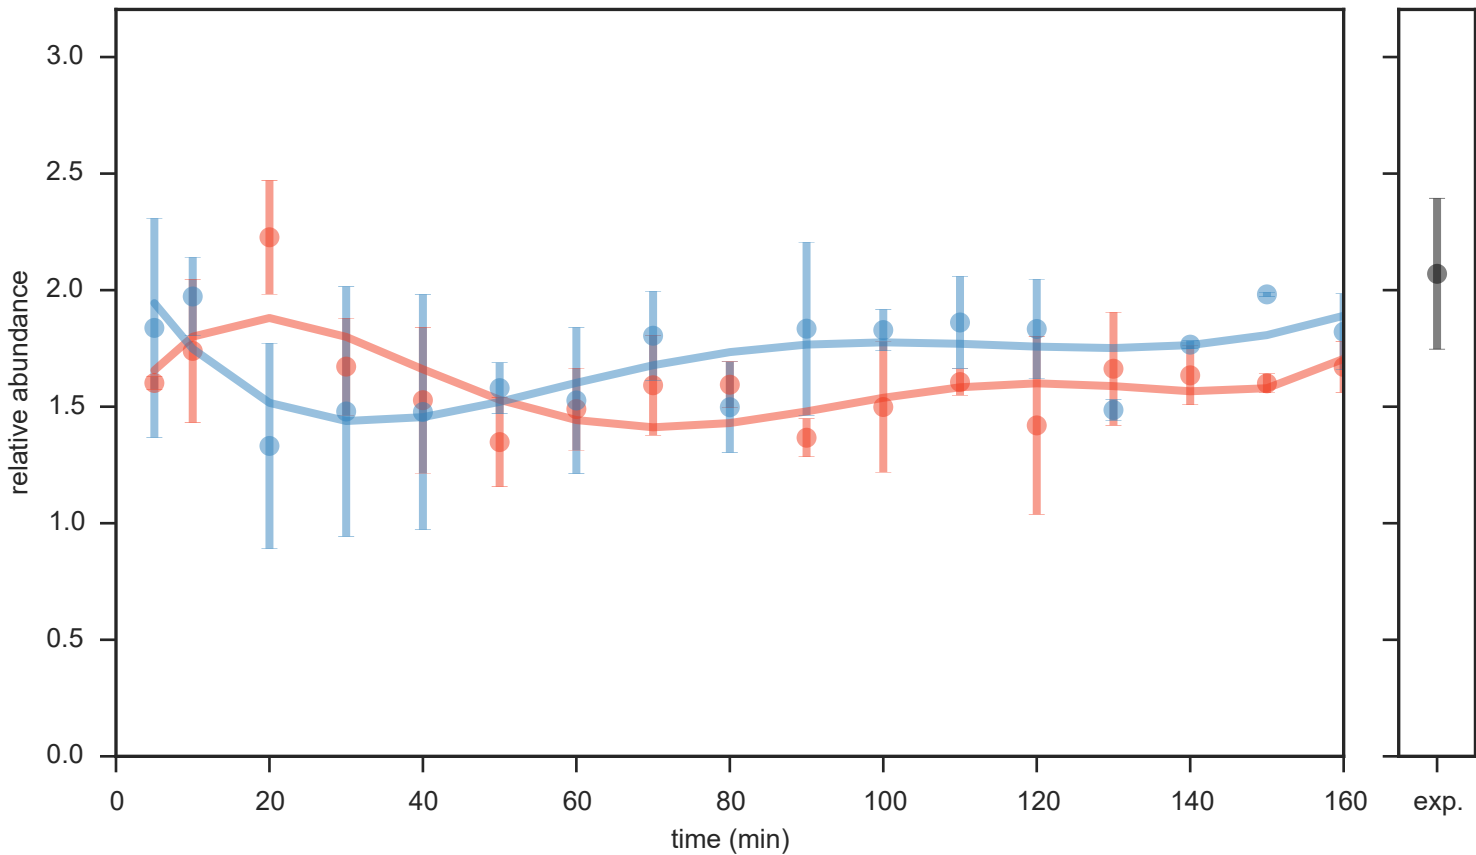

idms\_pid350\_mz359.11

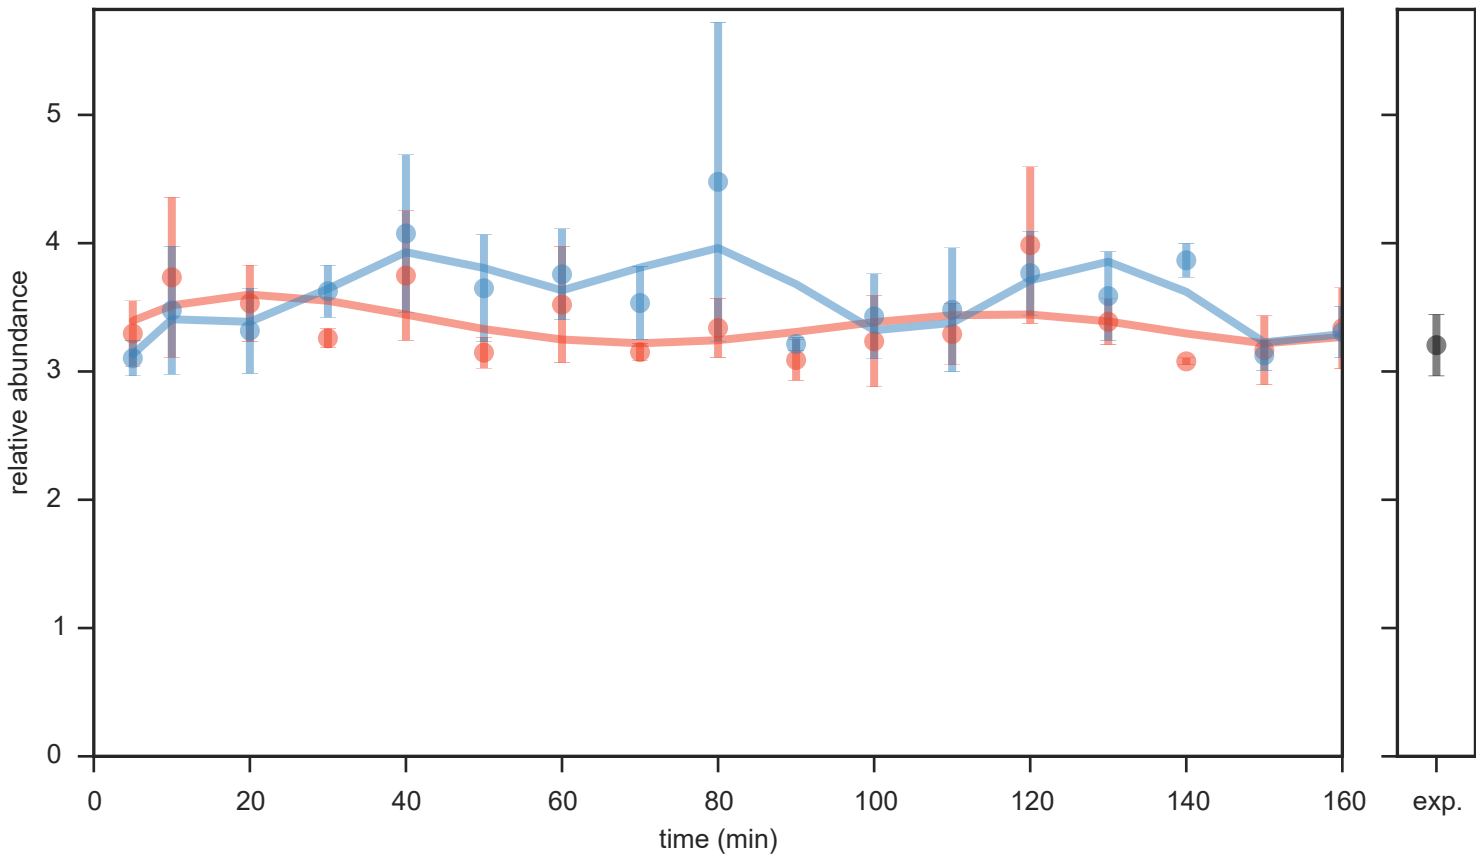

idms\_pid351\_mz358.14

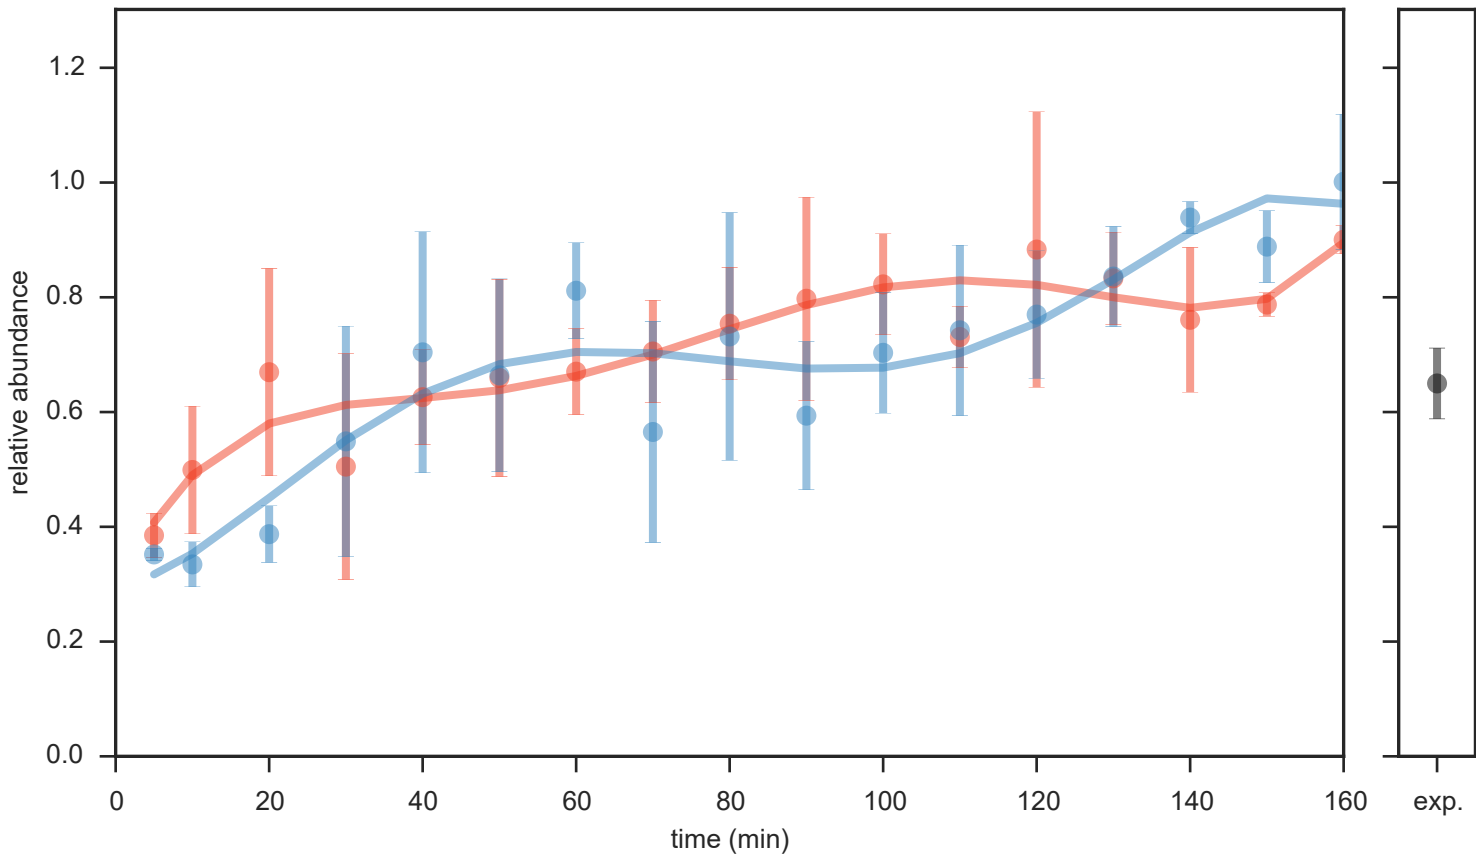

idms\_pid355\_mz101.02

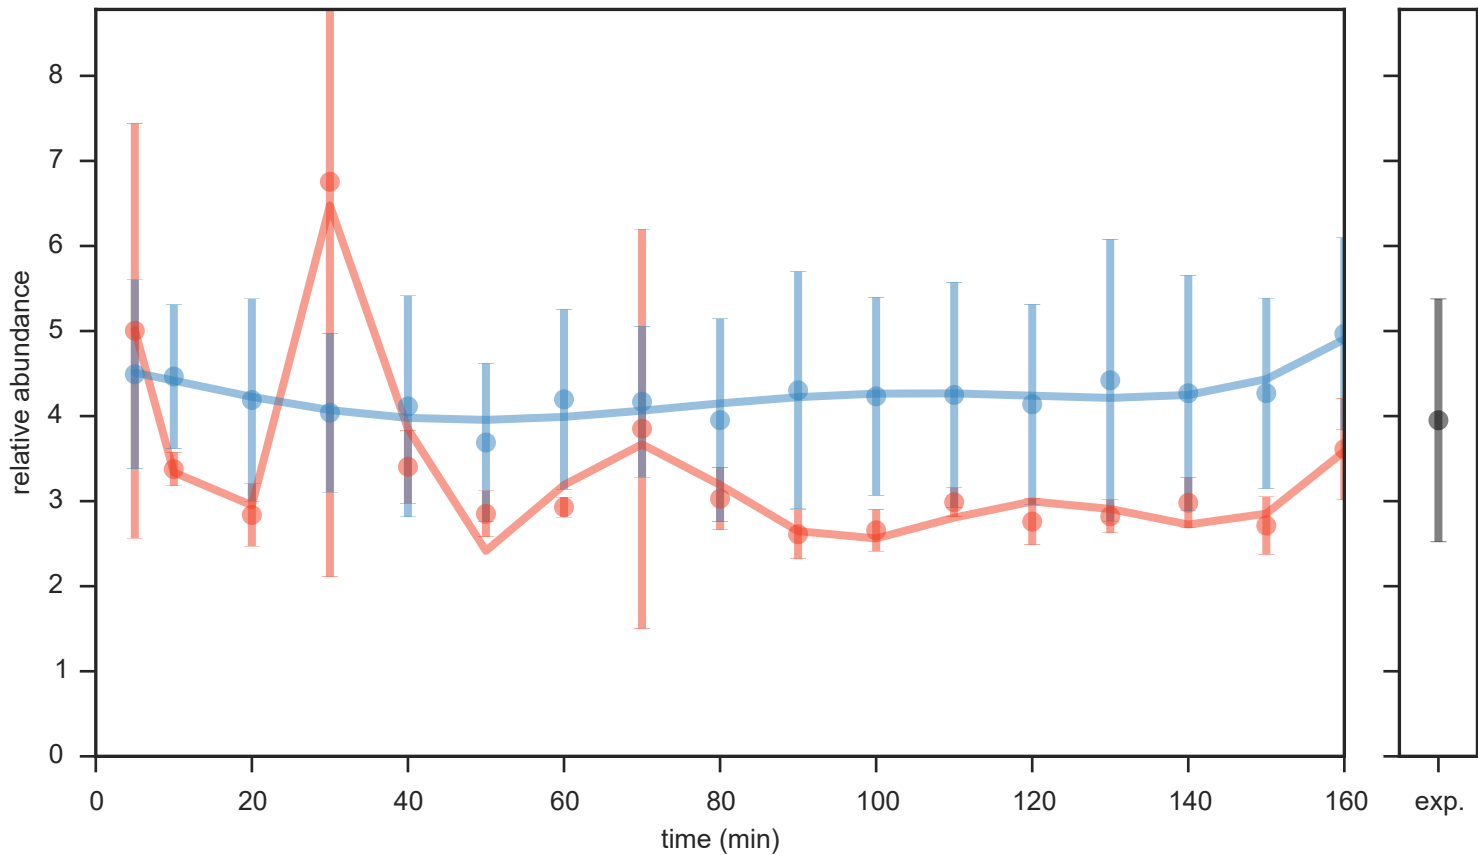

idms\_pid356\_mz259.02

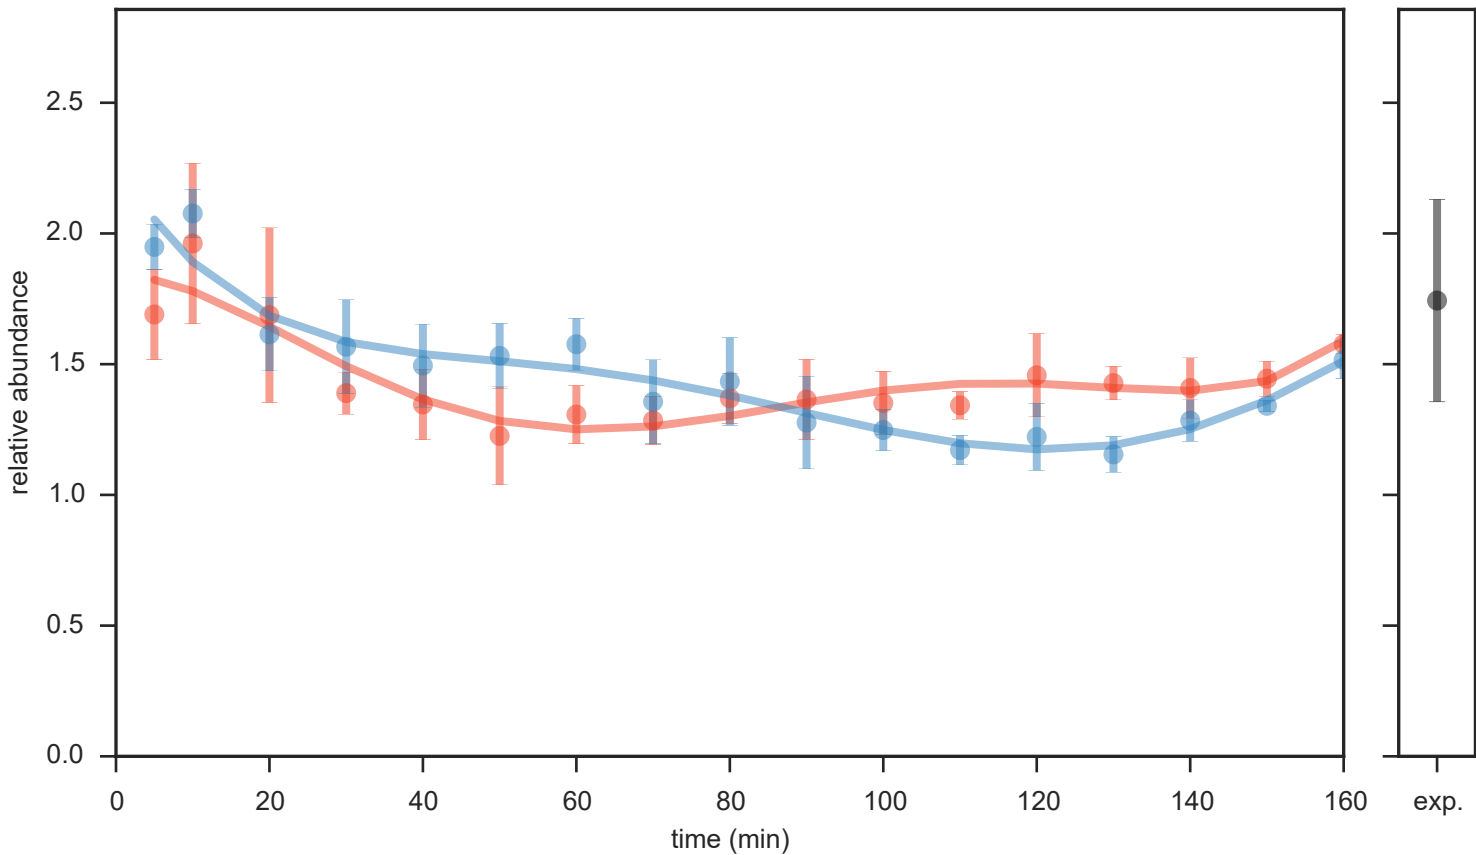



idms\_pid361\_mz390.91

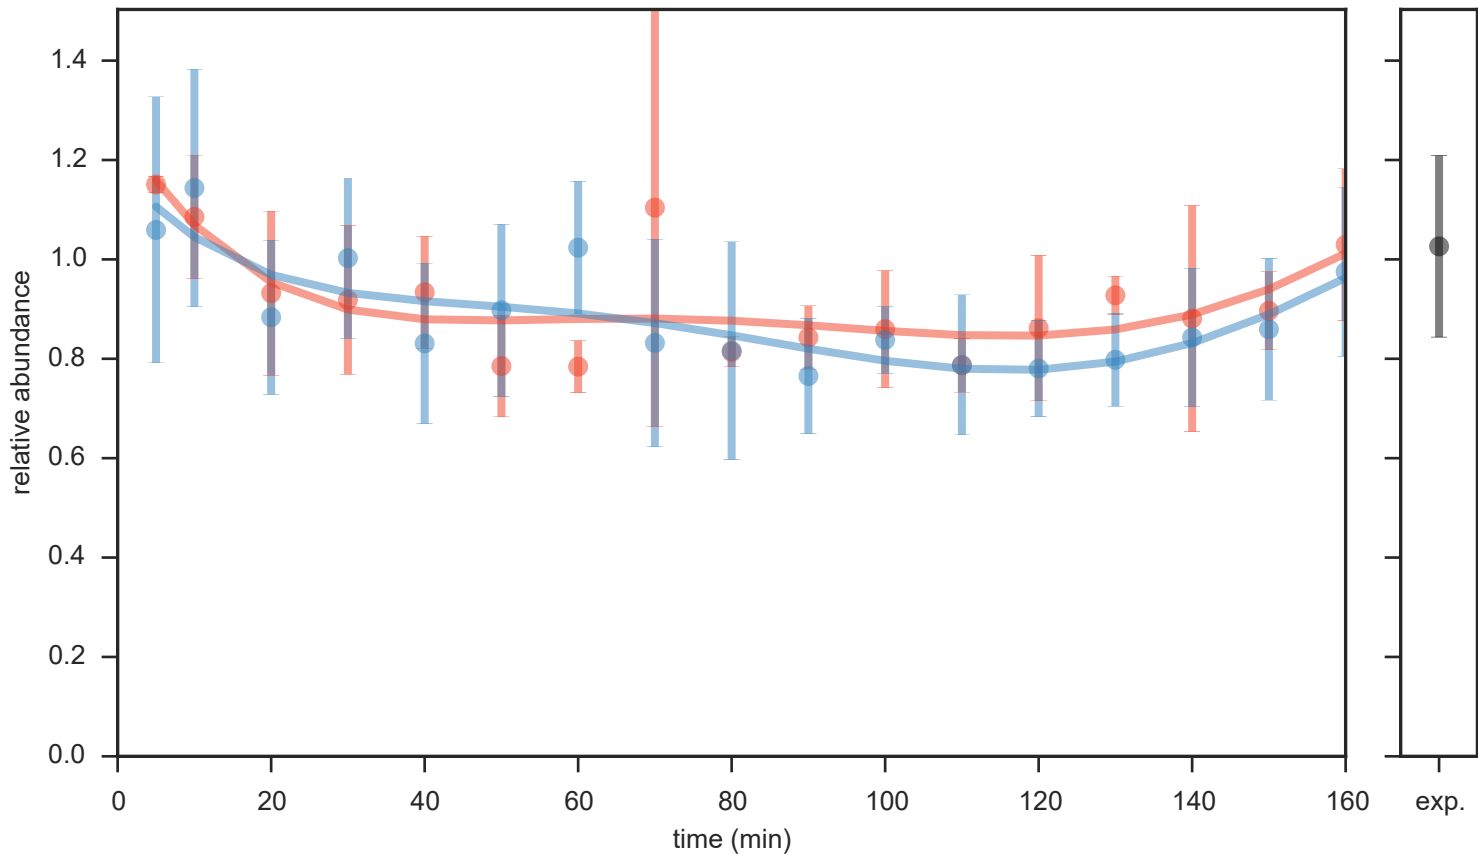

idms\_pid364\_mz391.57

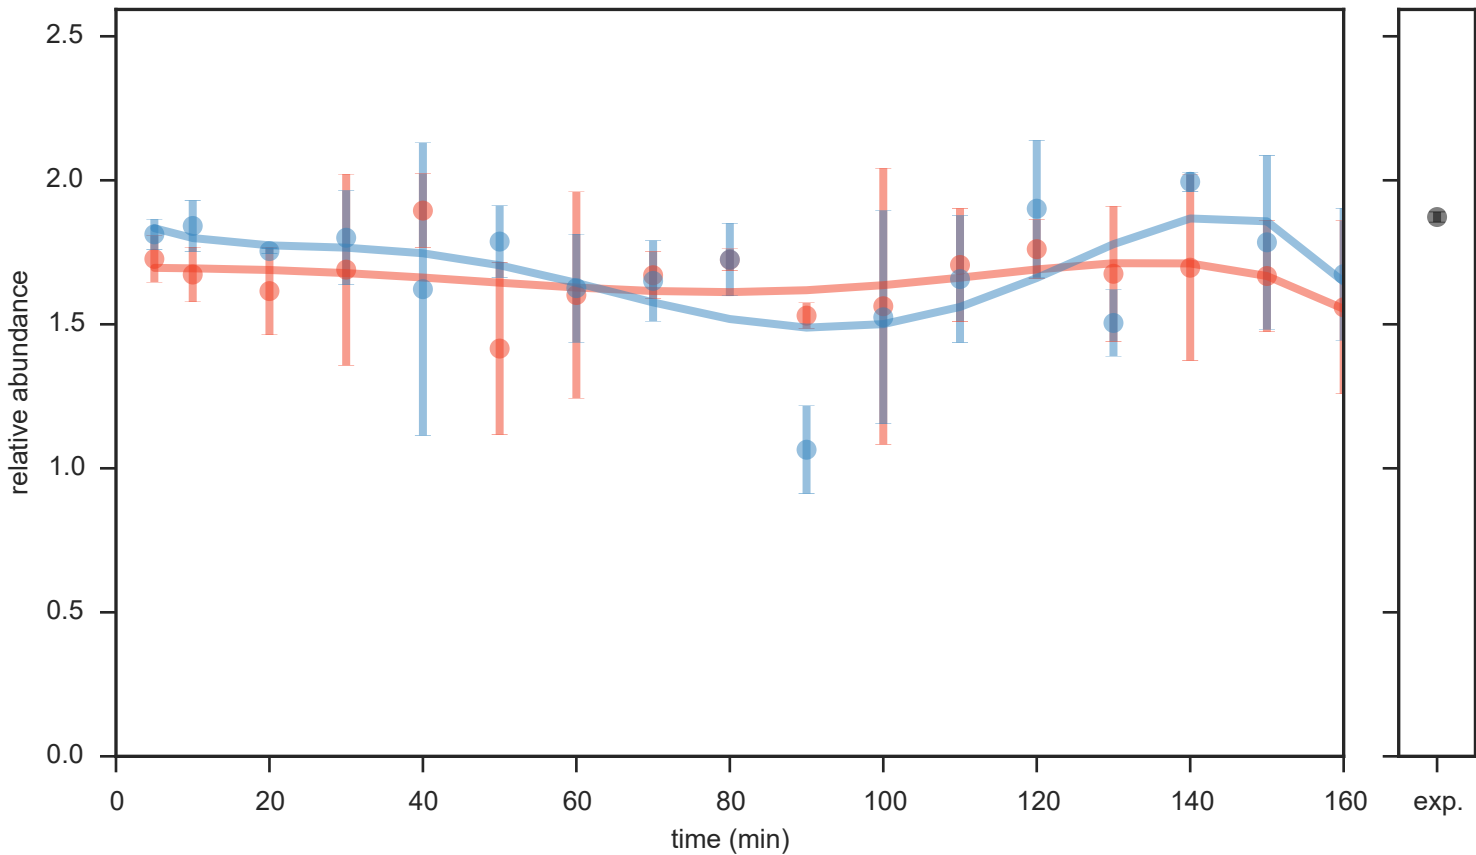

idms\_pid365\_mz370.97

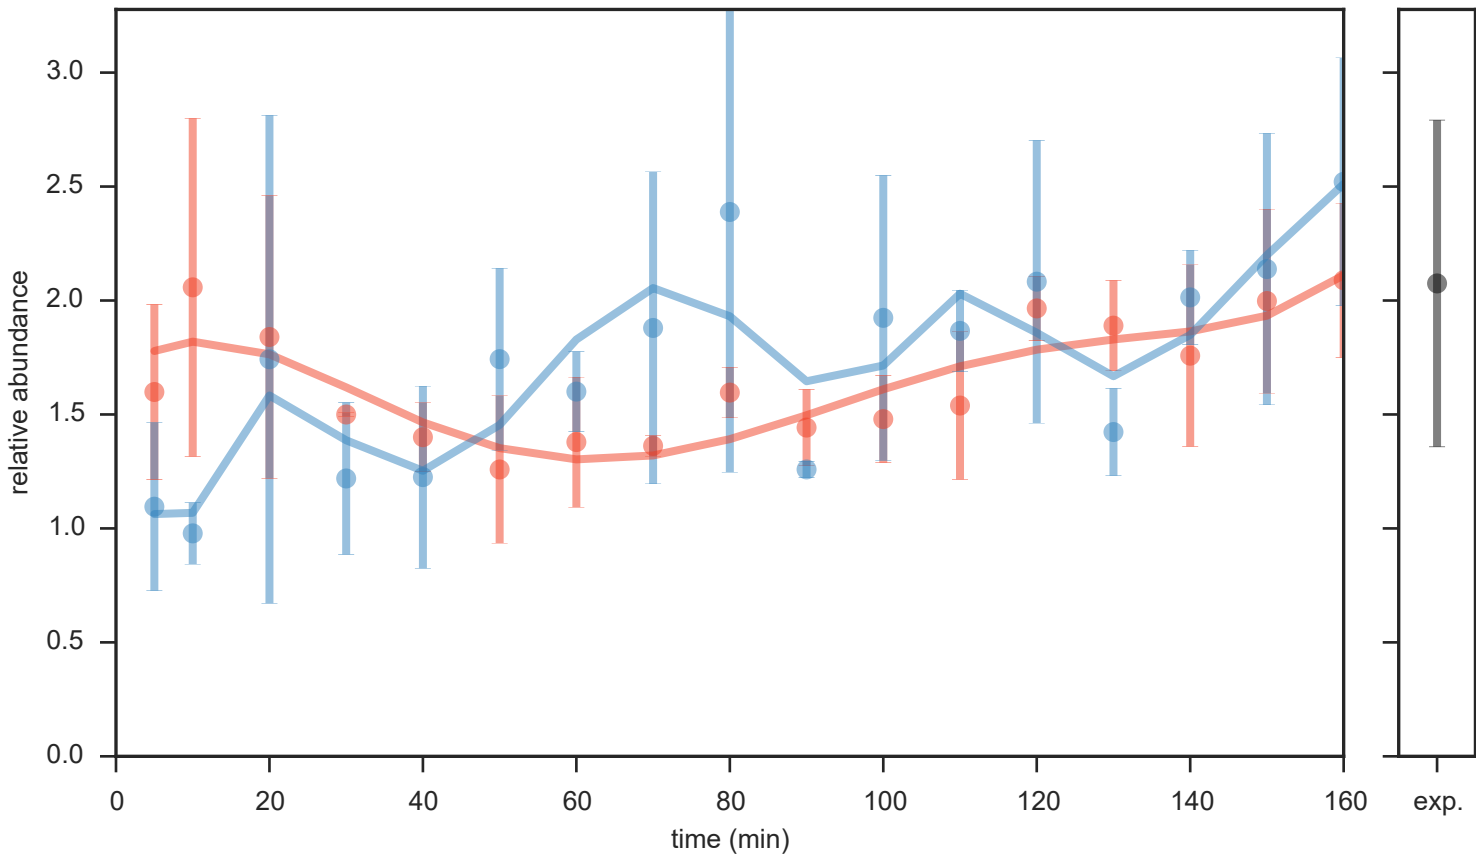

idms\_pid367\_mz200.50

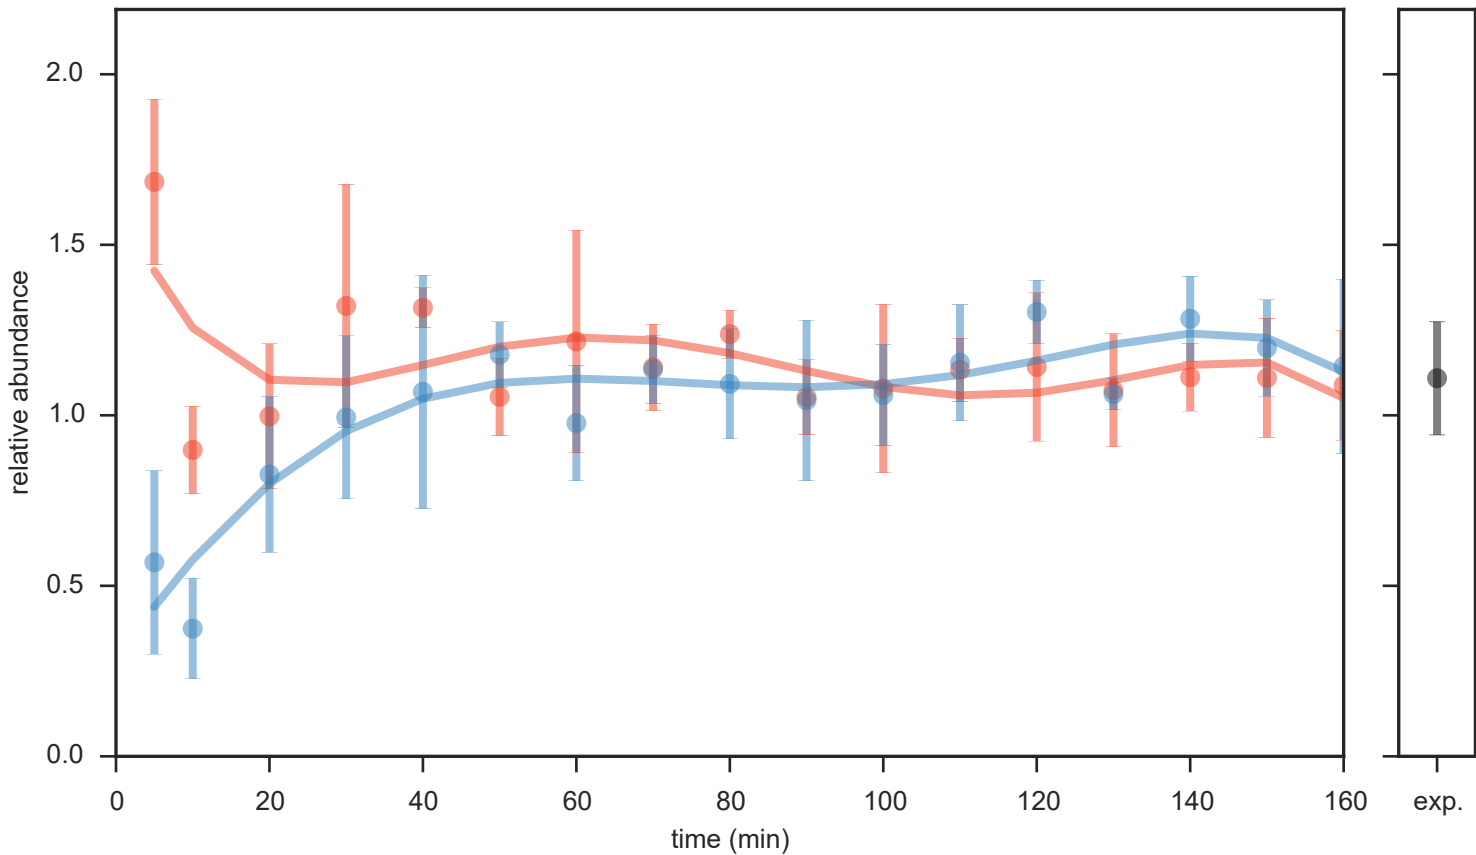

idms\_pid368\_mz386.01

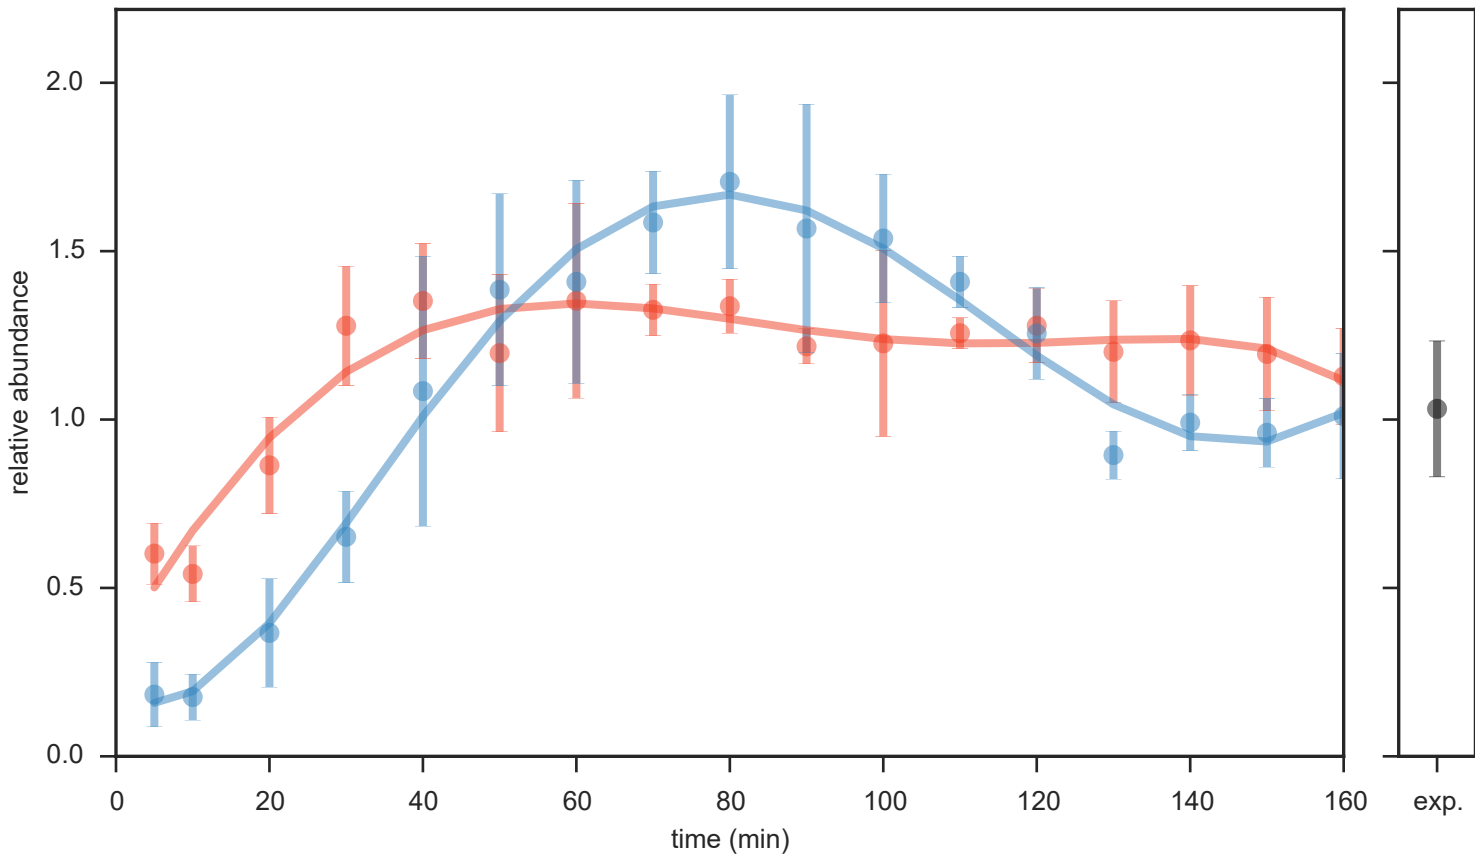

idms\_pid370\_mz240.48

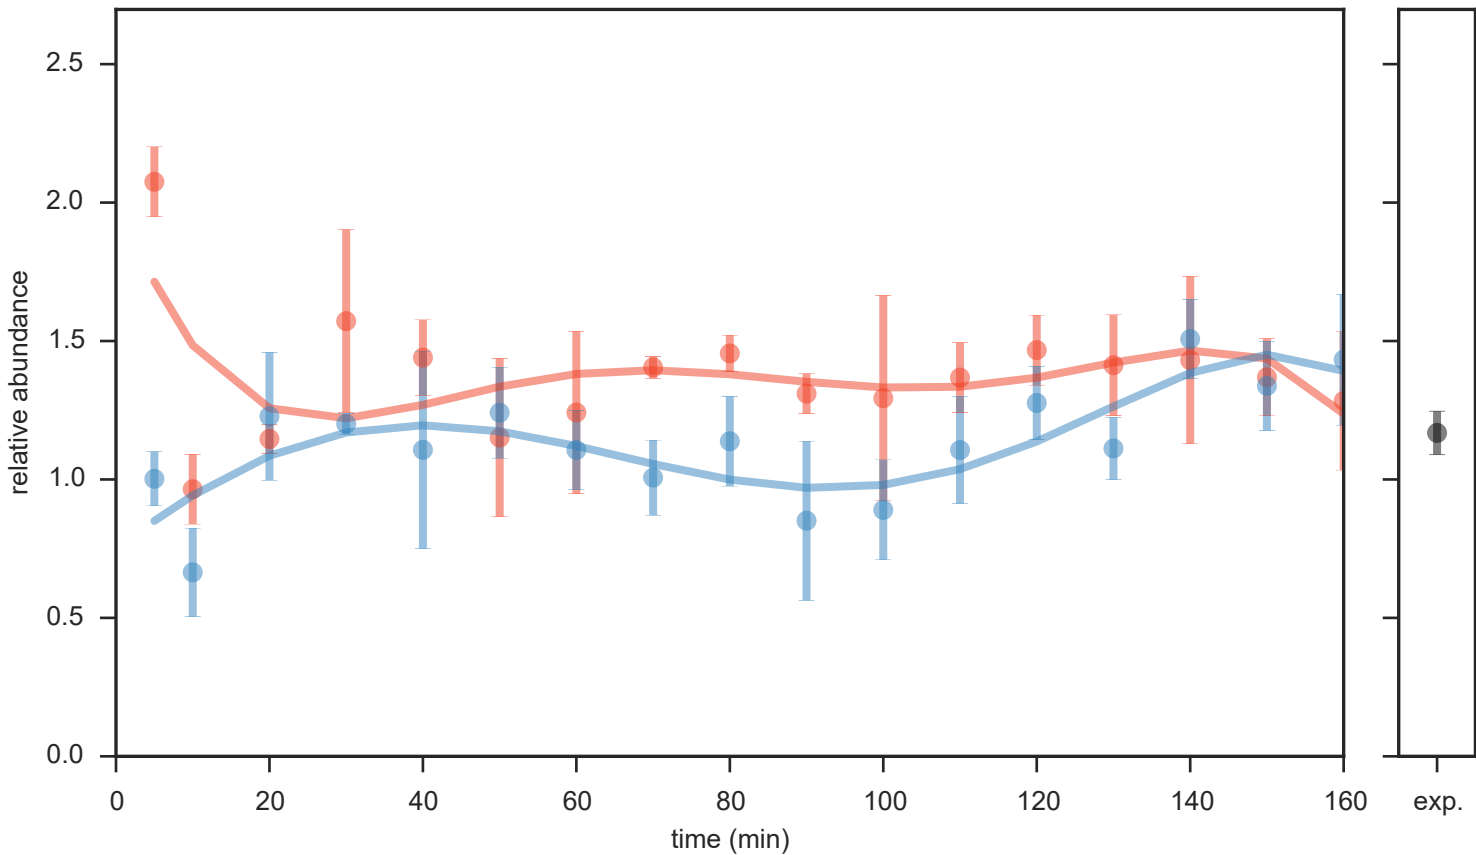

idms\_pid371\_mz173.00

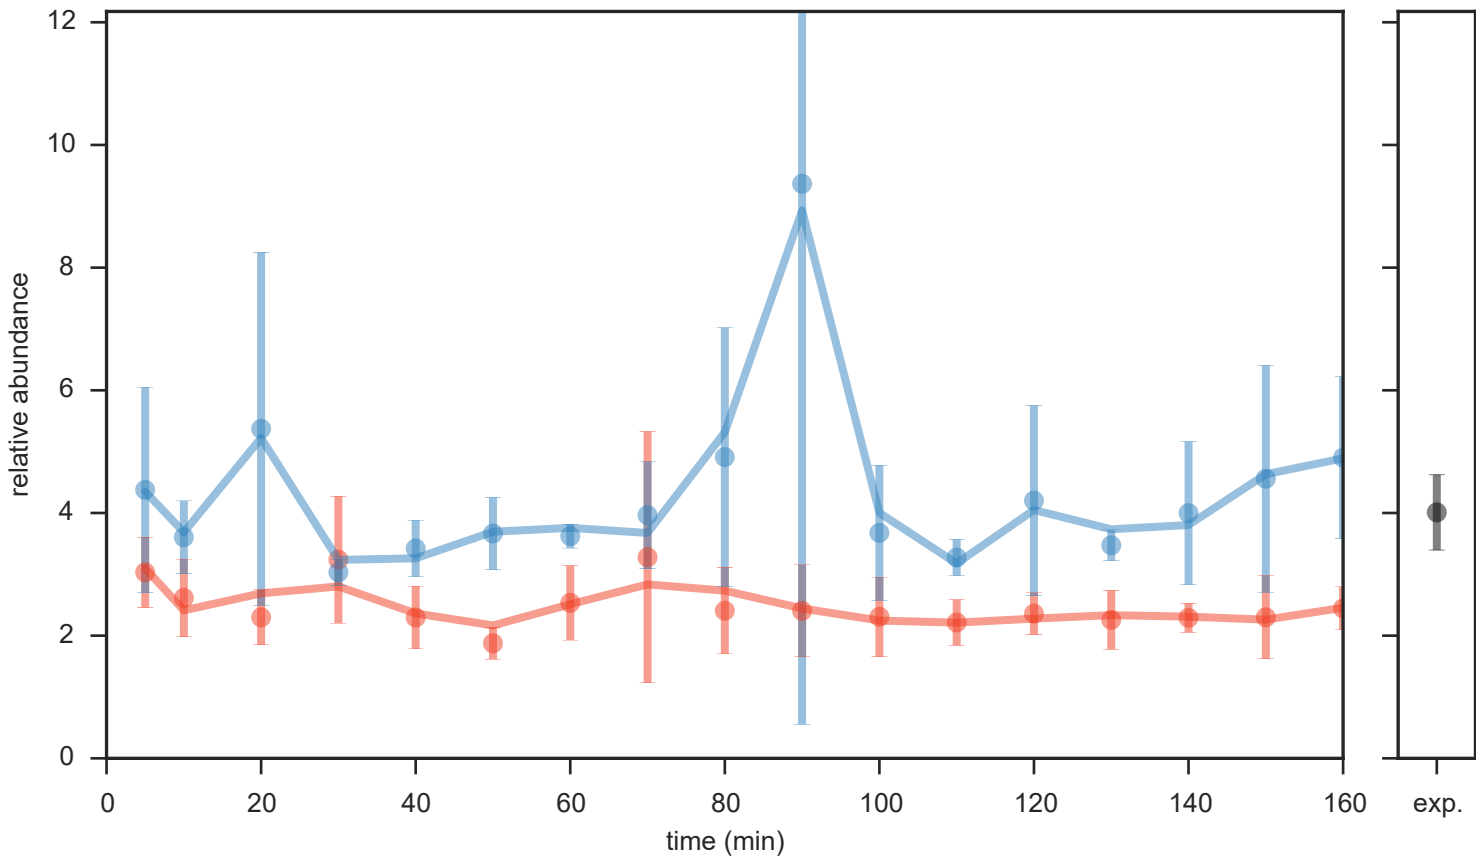

idms\_pid374\_mz323.02

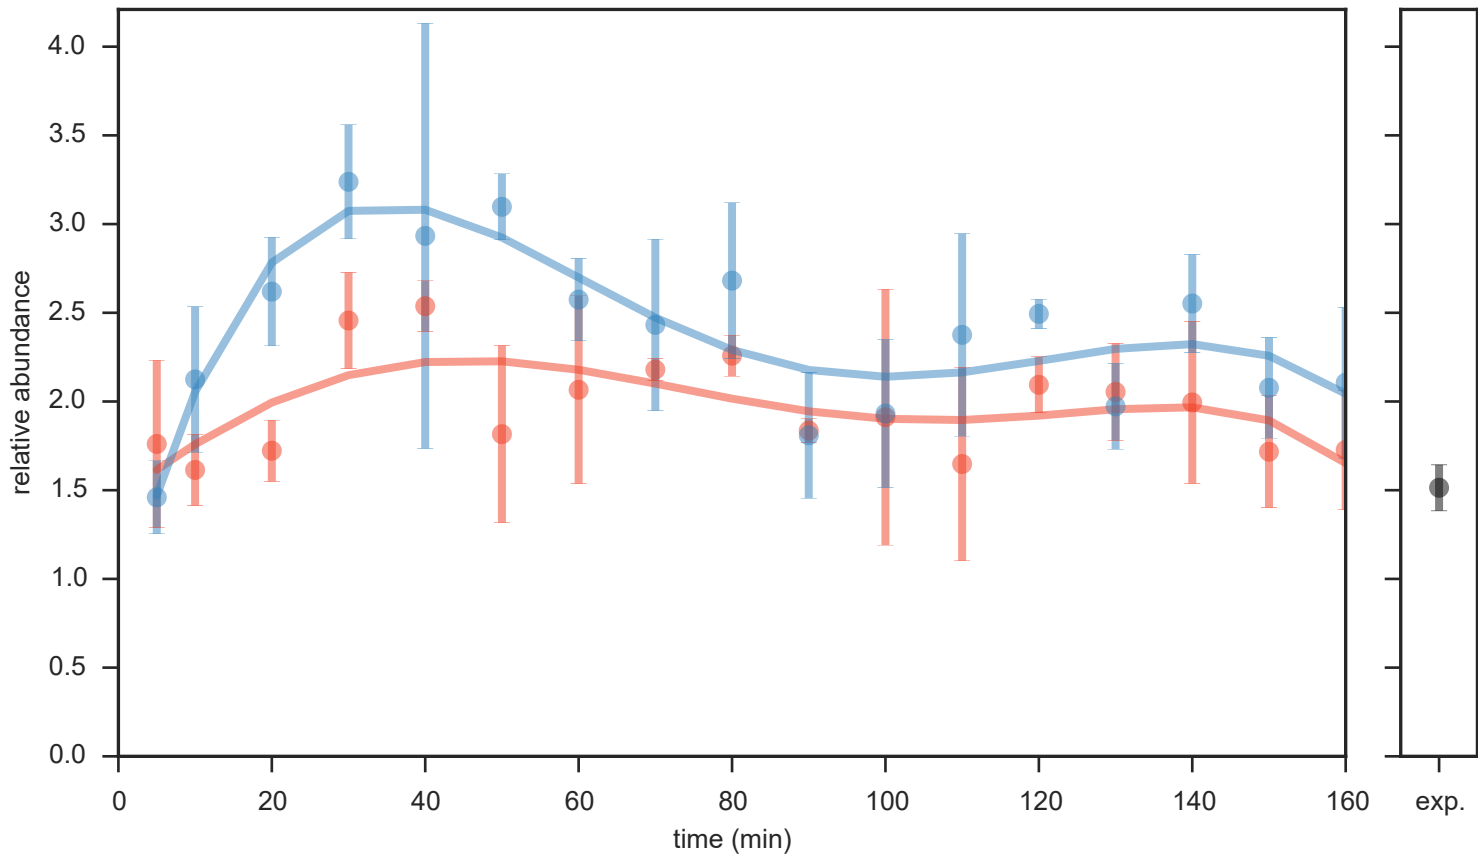



idms\_pid375\_mz309.50

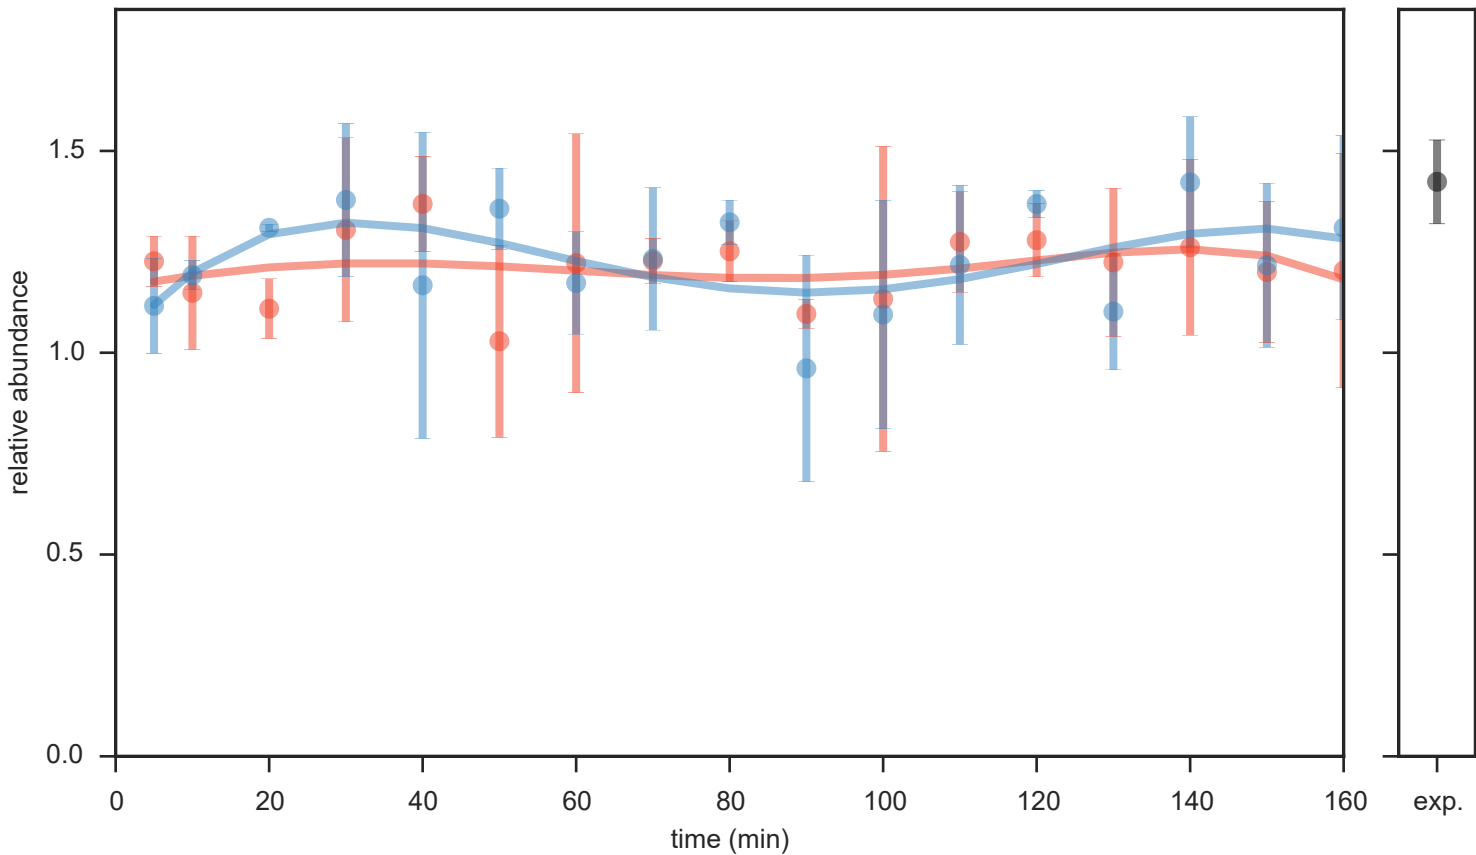

idms\_pid380\_mz173.01

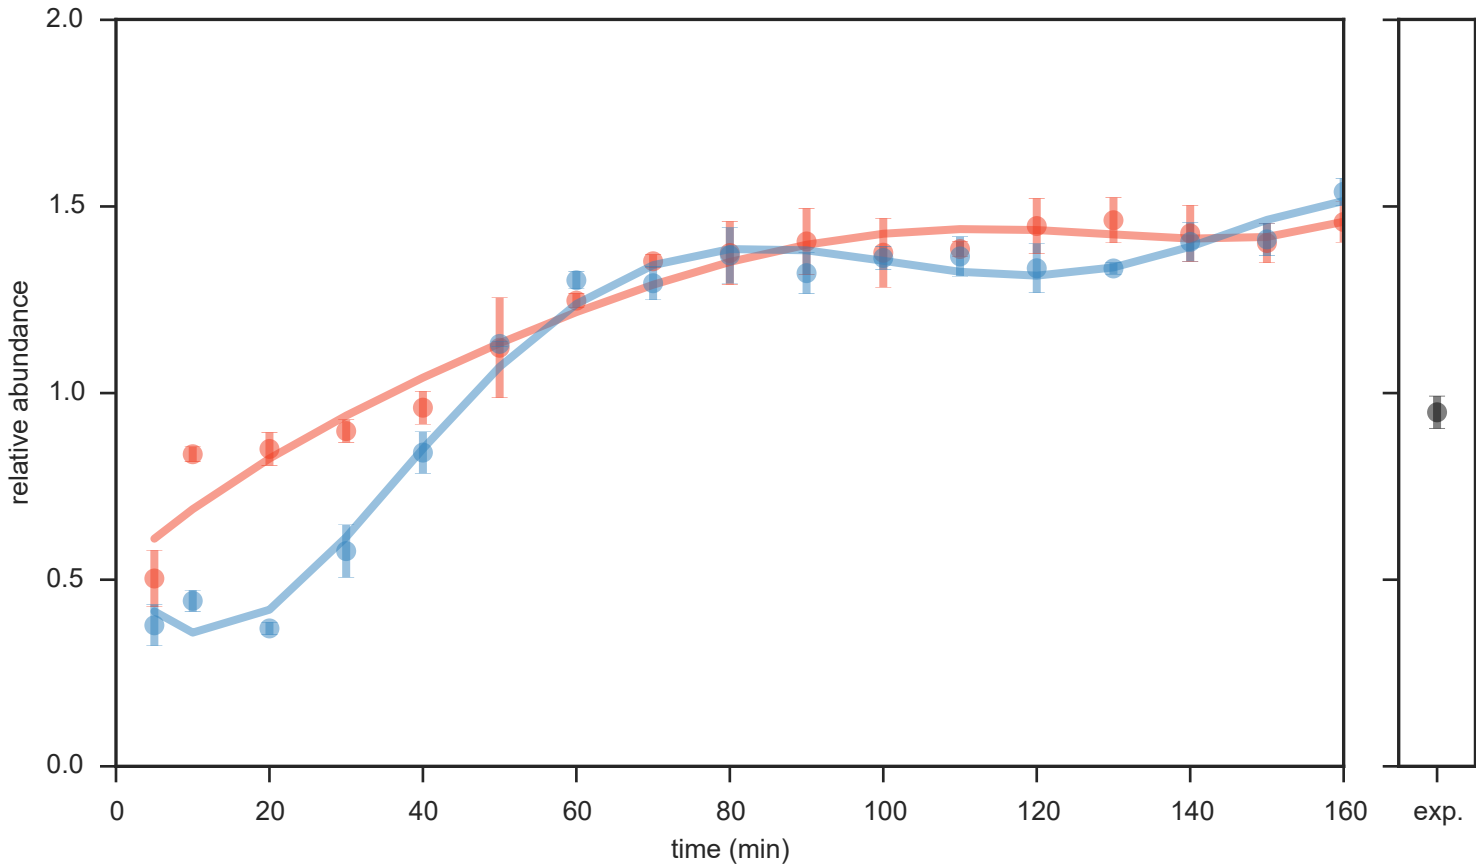

idms\_pid382\_mz161.00

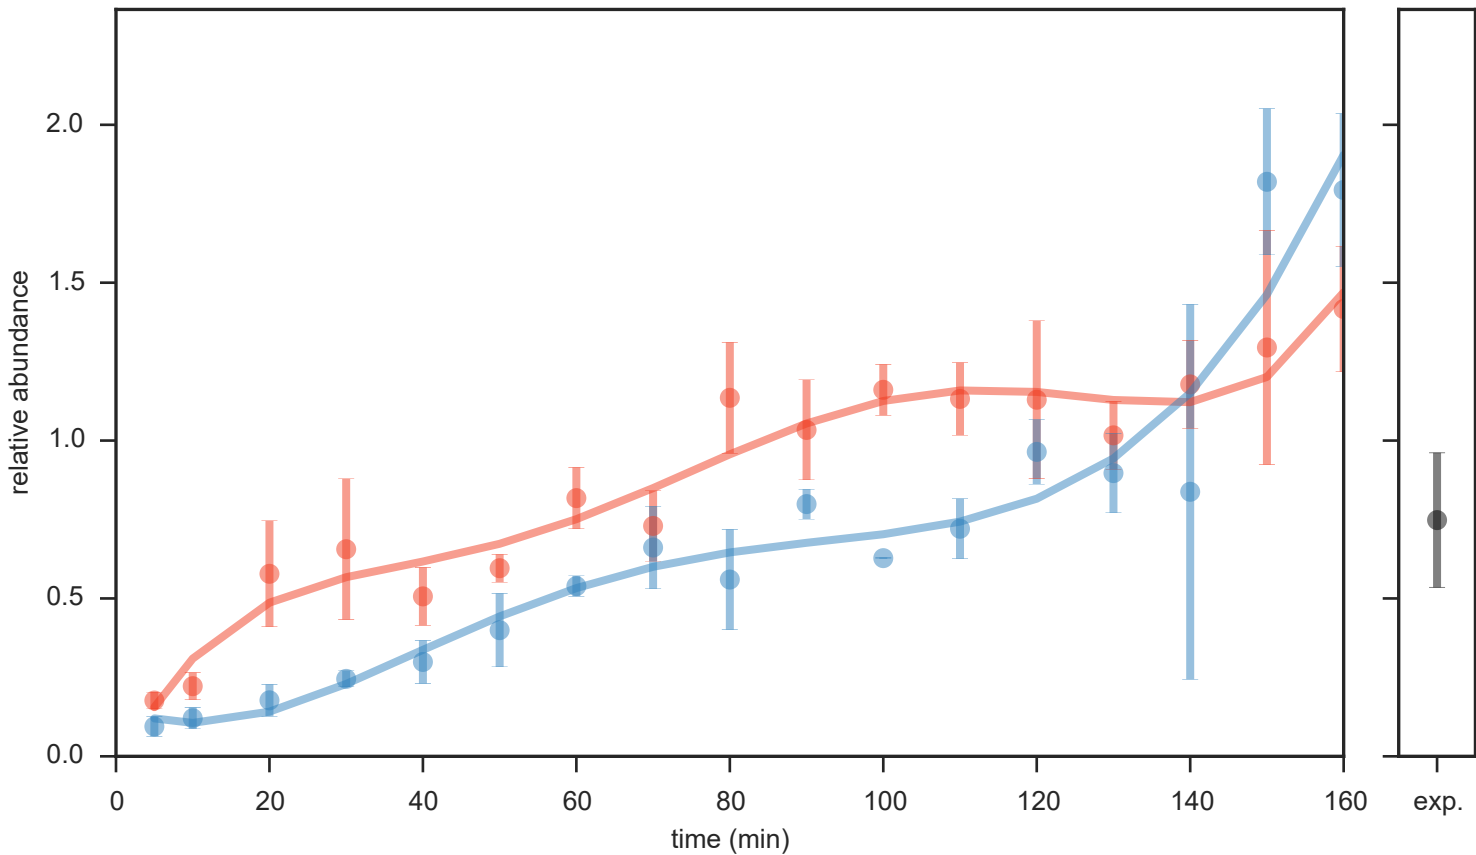

idms\_pid387\_mz293.53

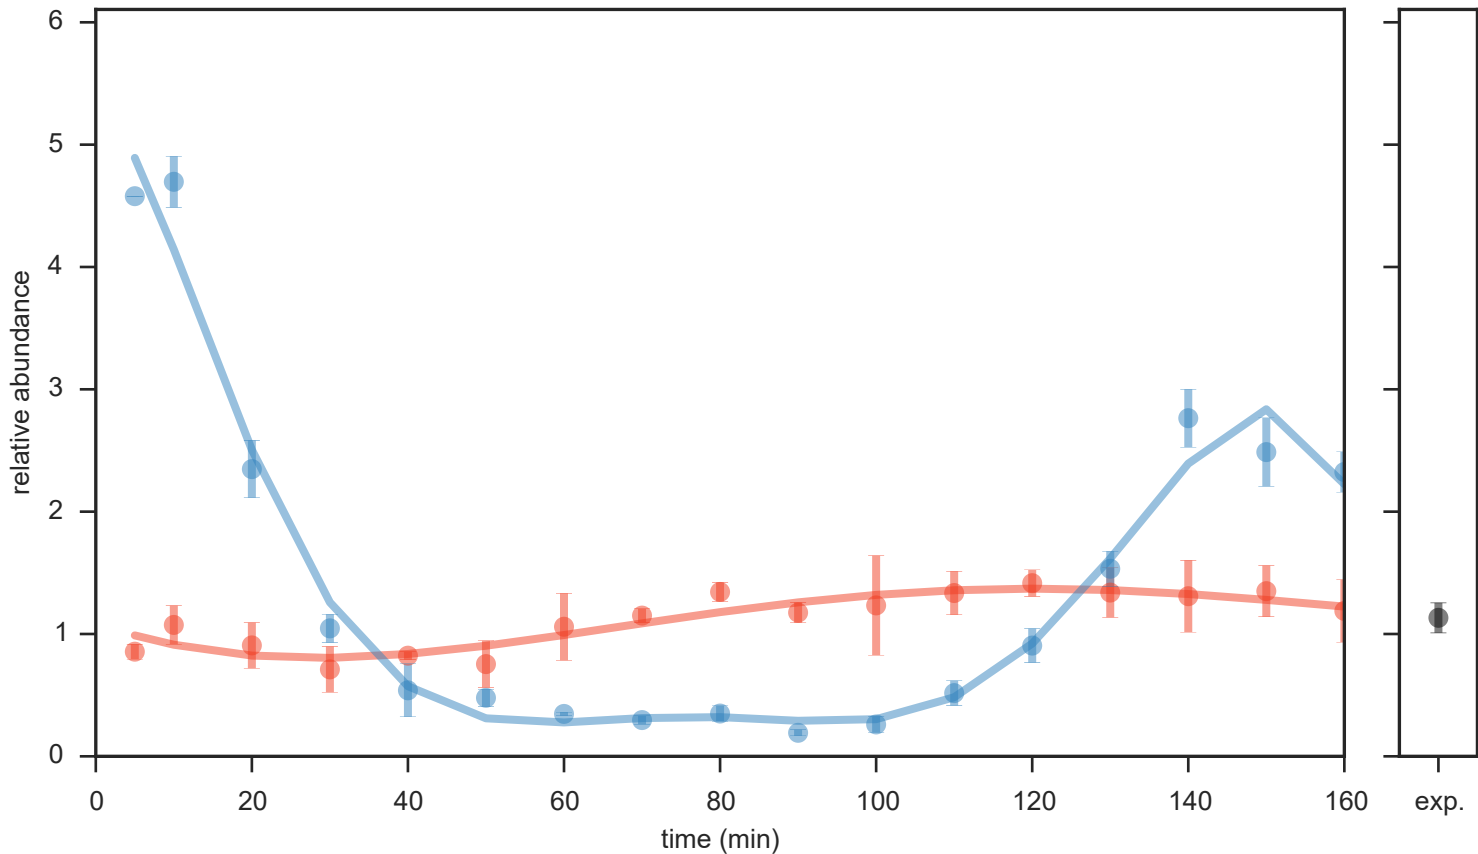

idms\_pid394\_mz226.02

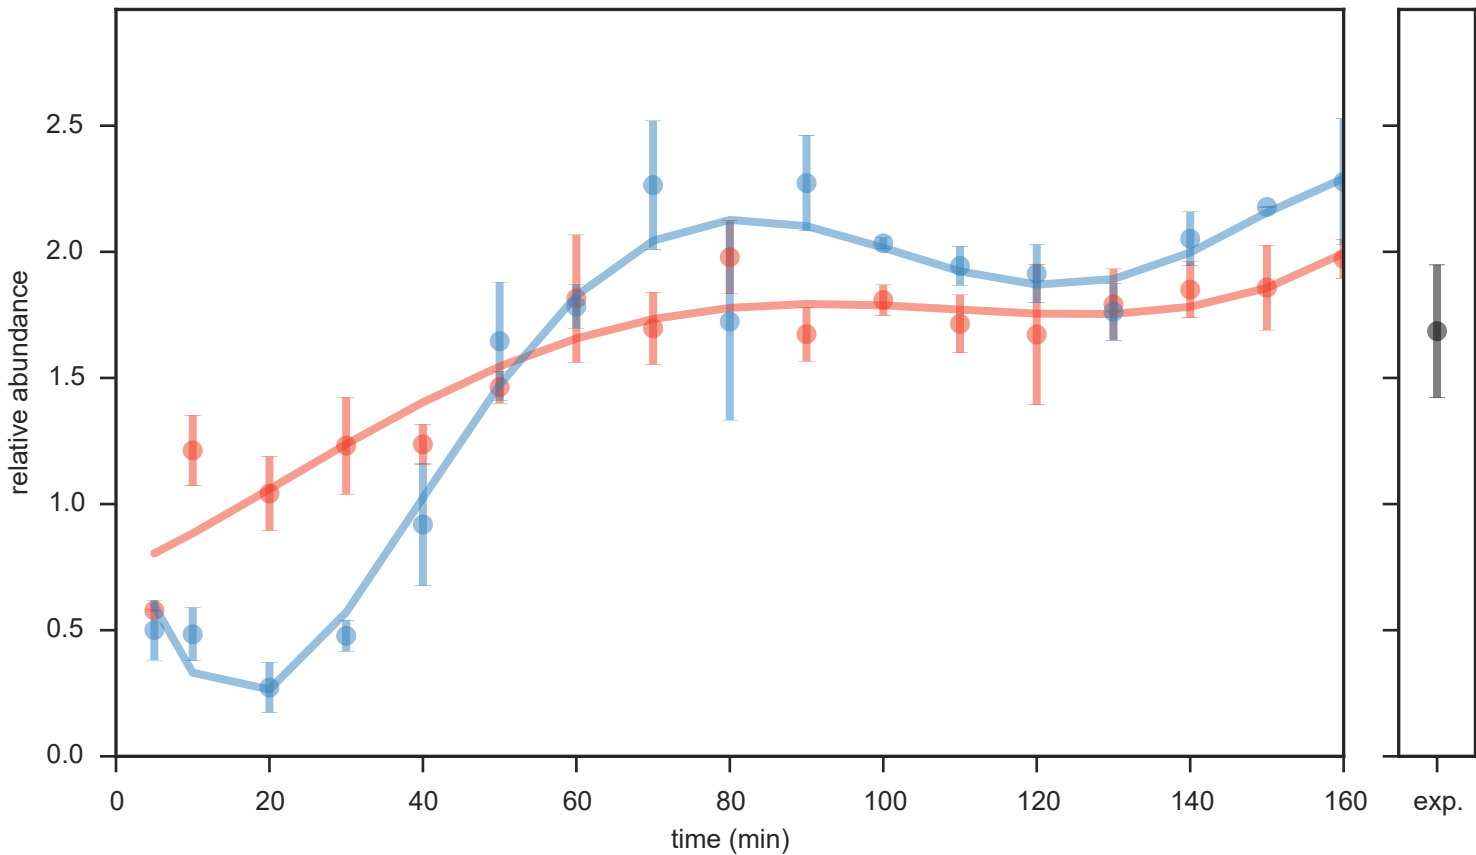

idms\_pid399\_mz388.97

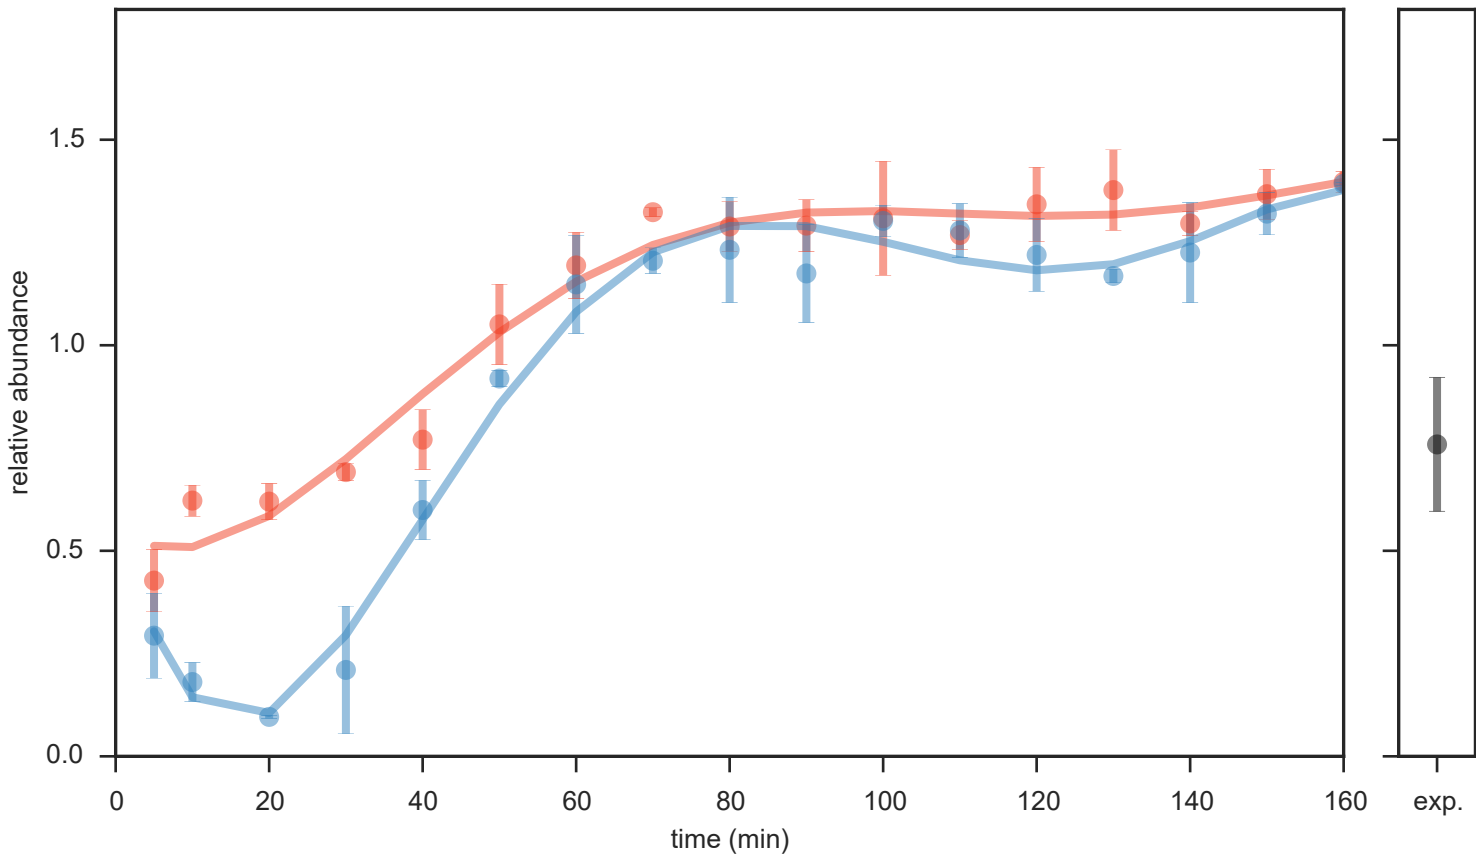

idms\_pid400\_mz252.48

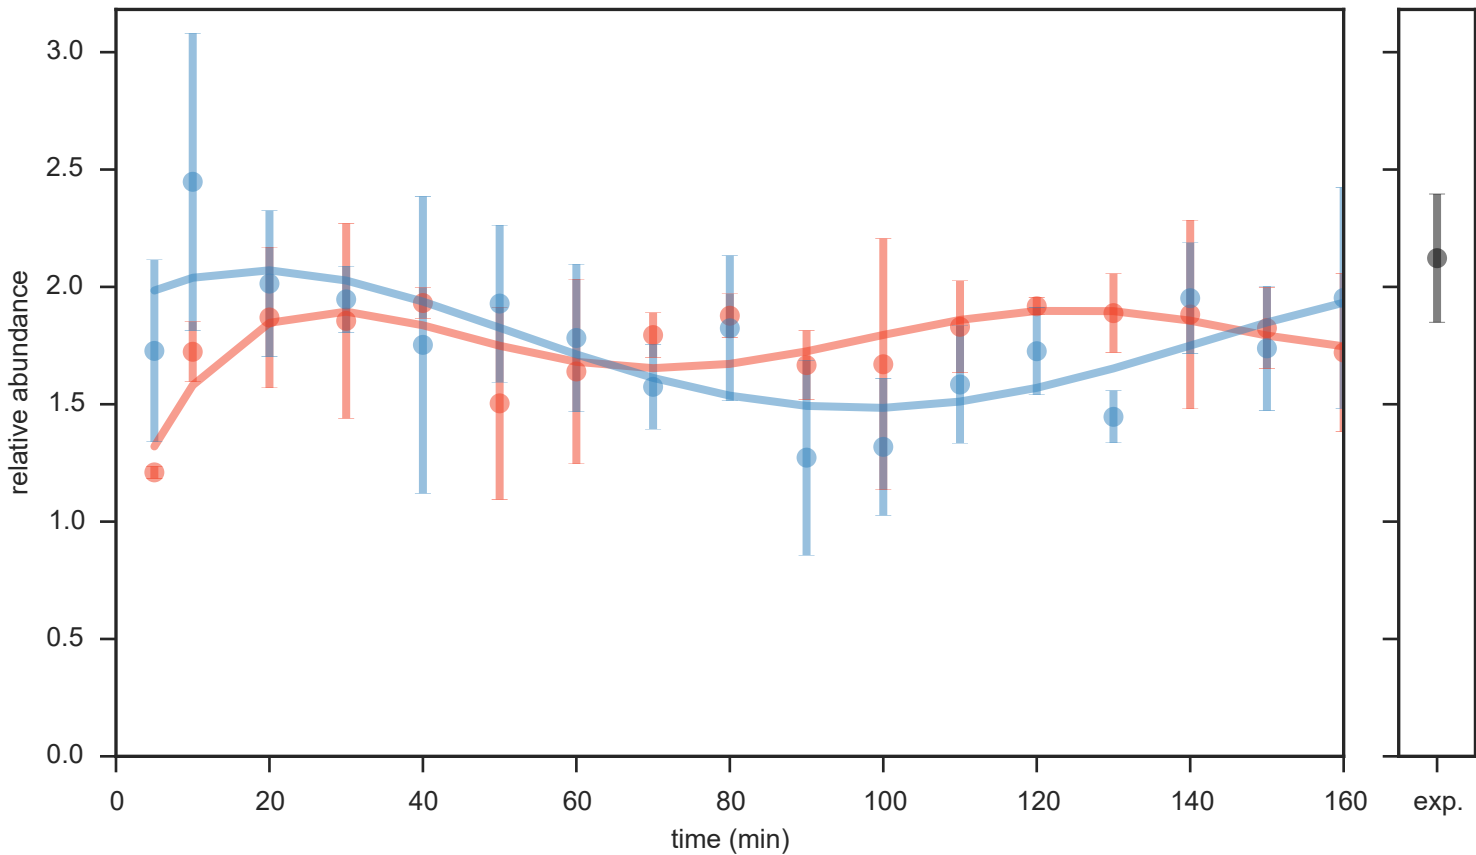

idms\_pid403\_mz222.94

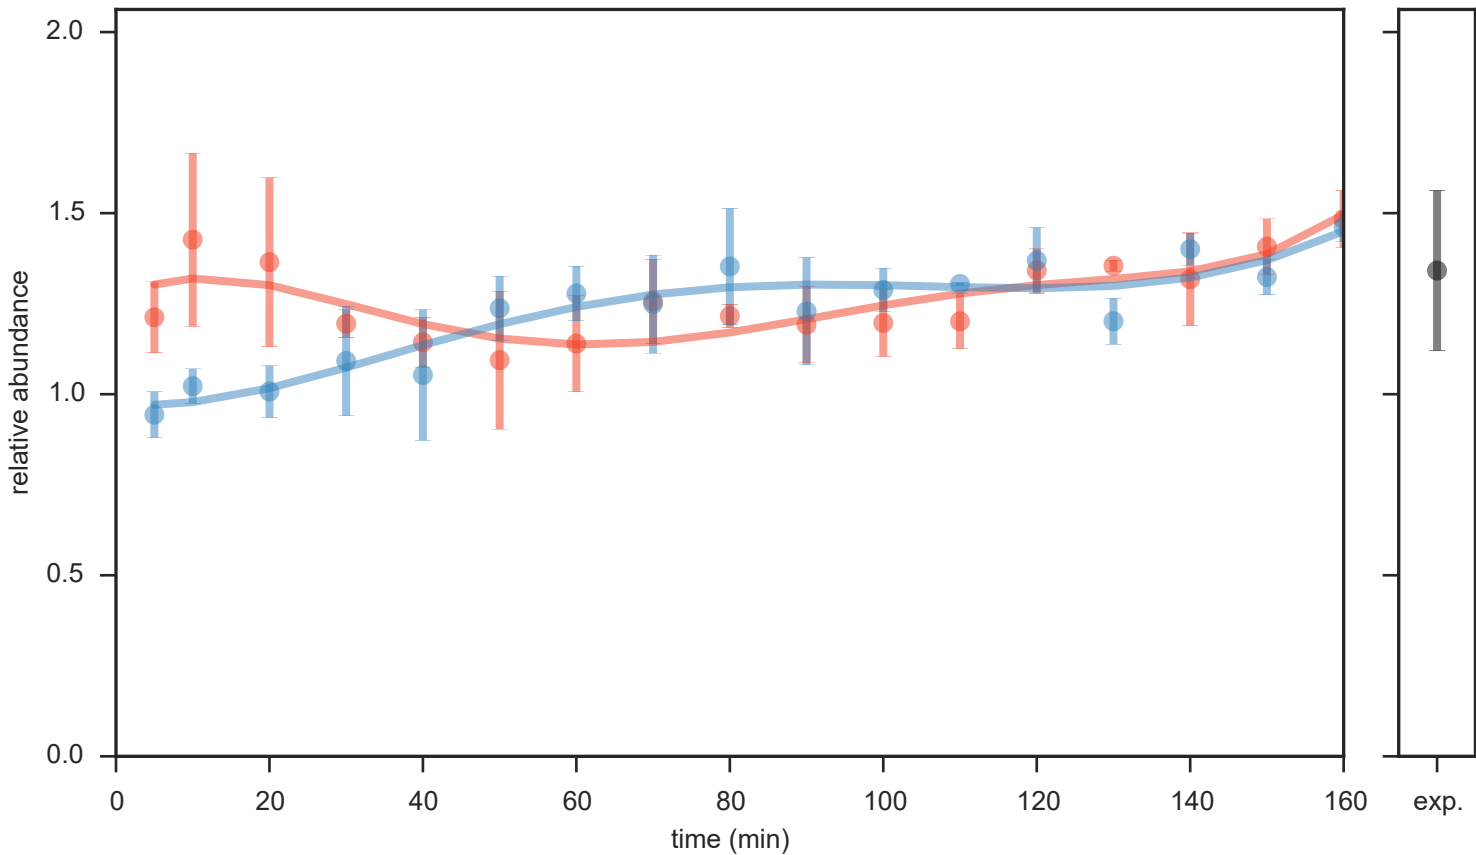



idms\_pid404\_mz327.05

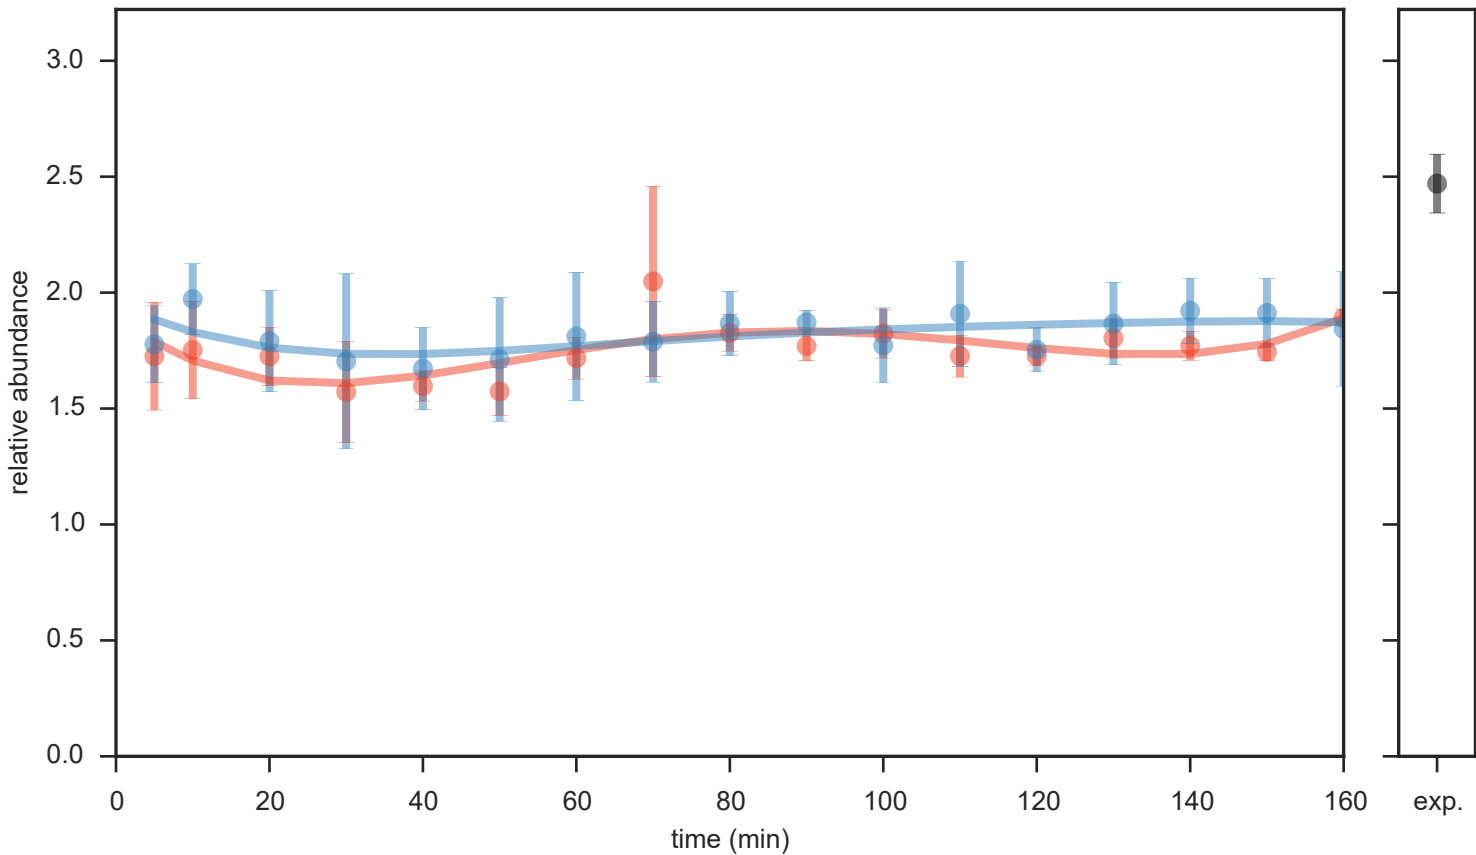

idms\_pid414\_mz522.04

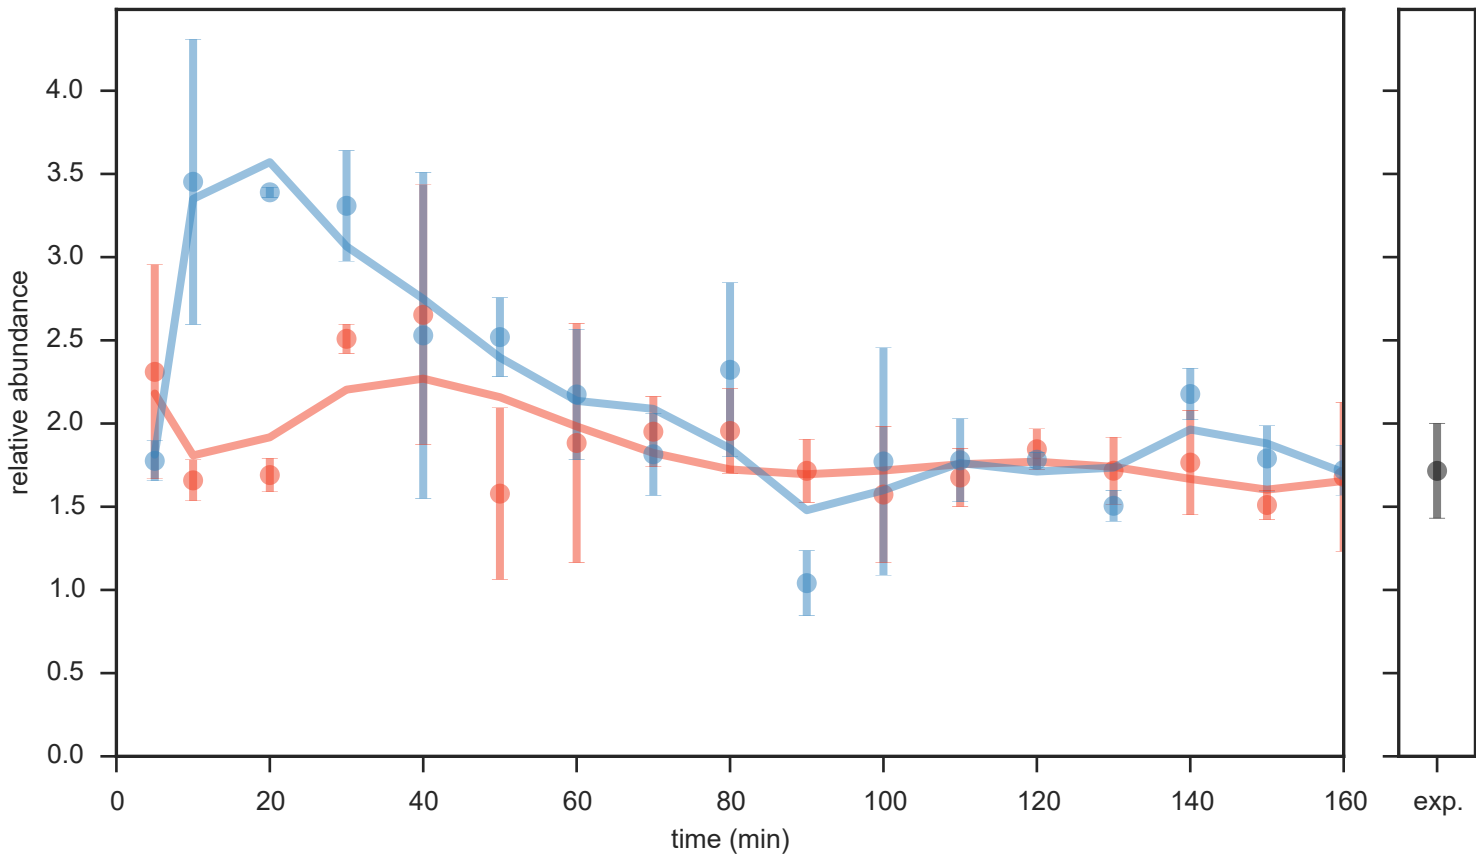

idms\_pid417\_mz287.53

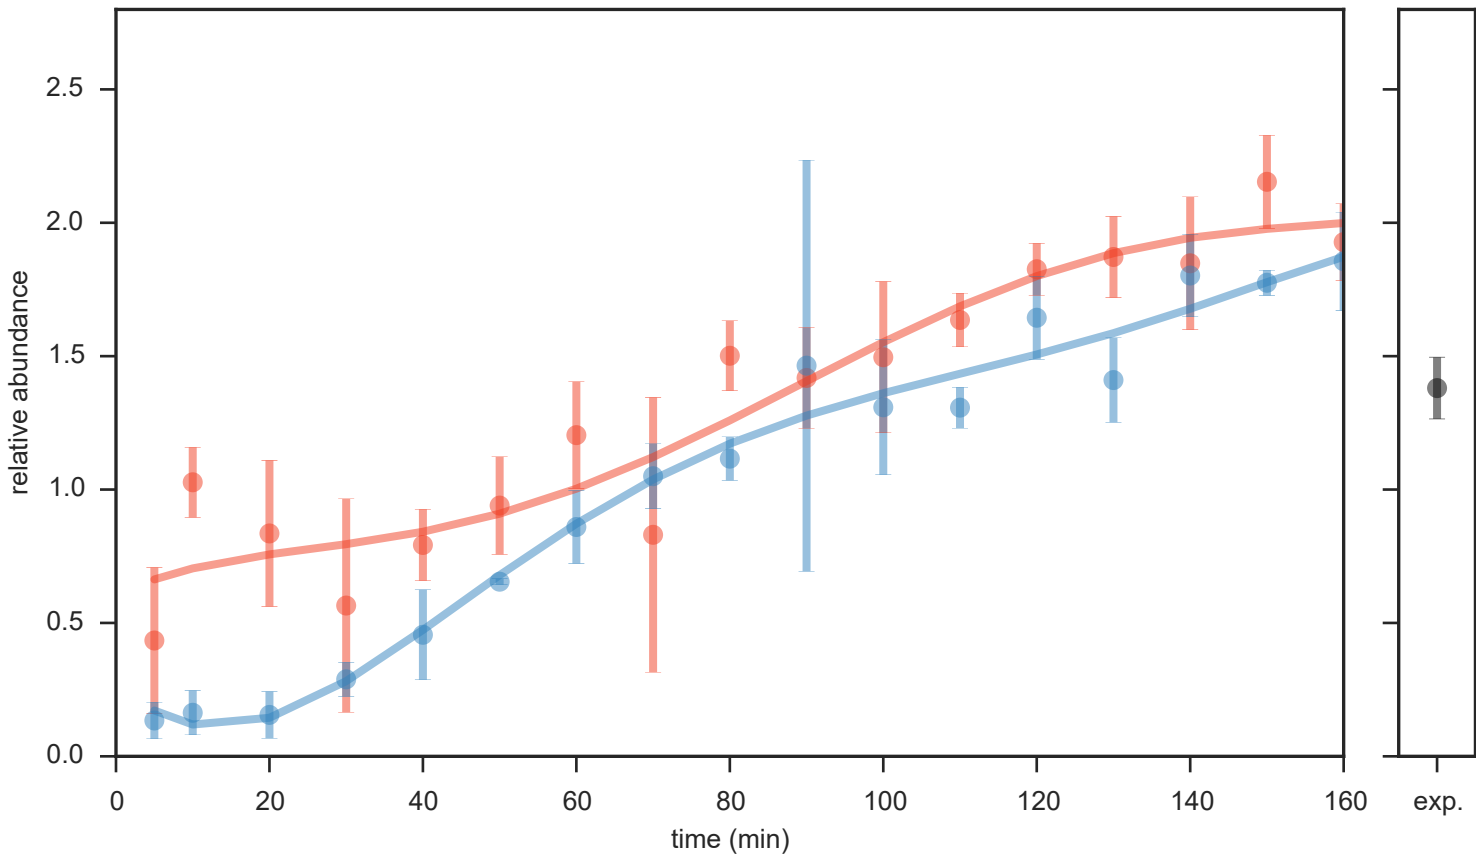

idms\_pid420\_mz226.99

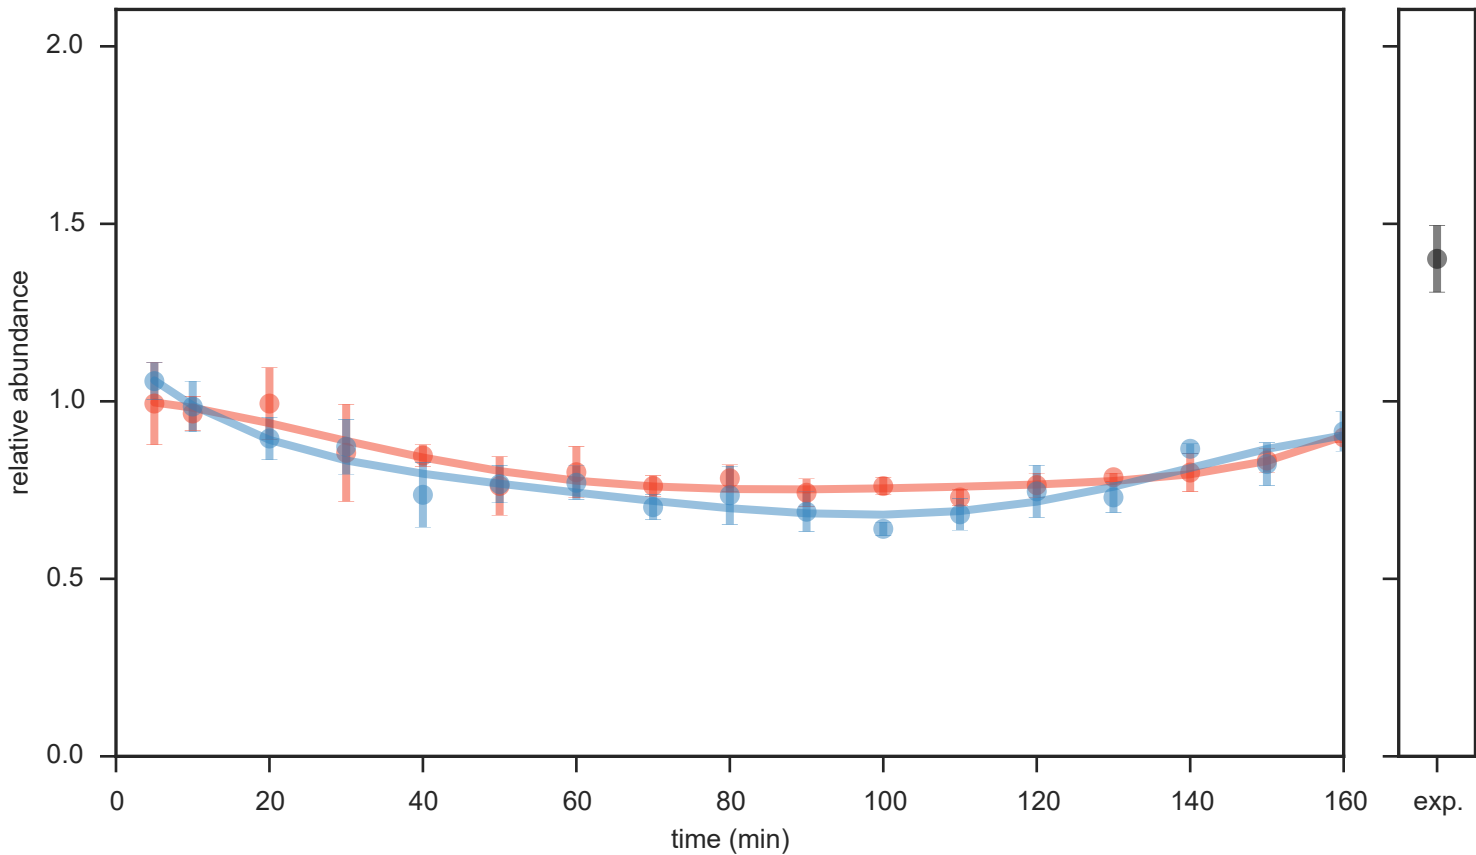

idms\_pid421\_mz388.54

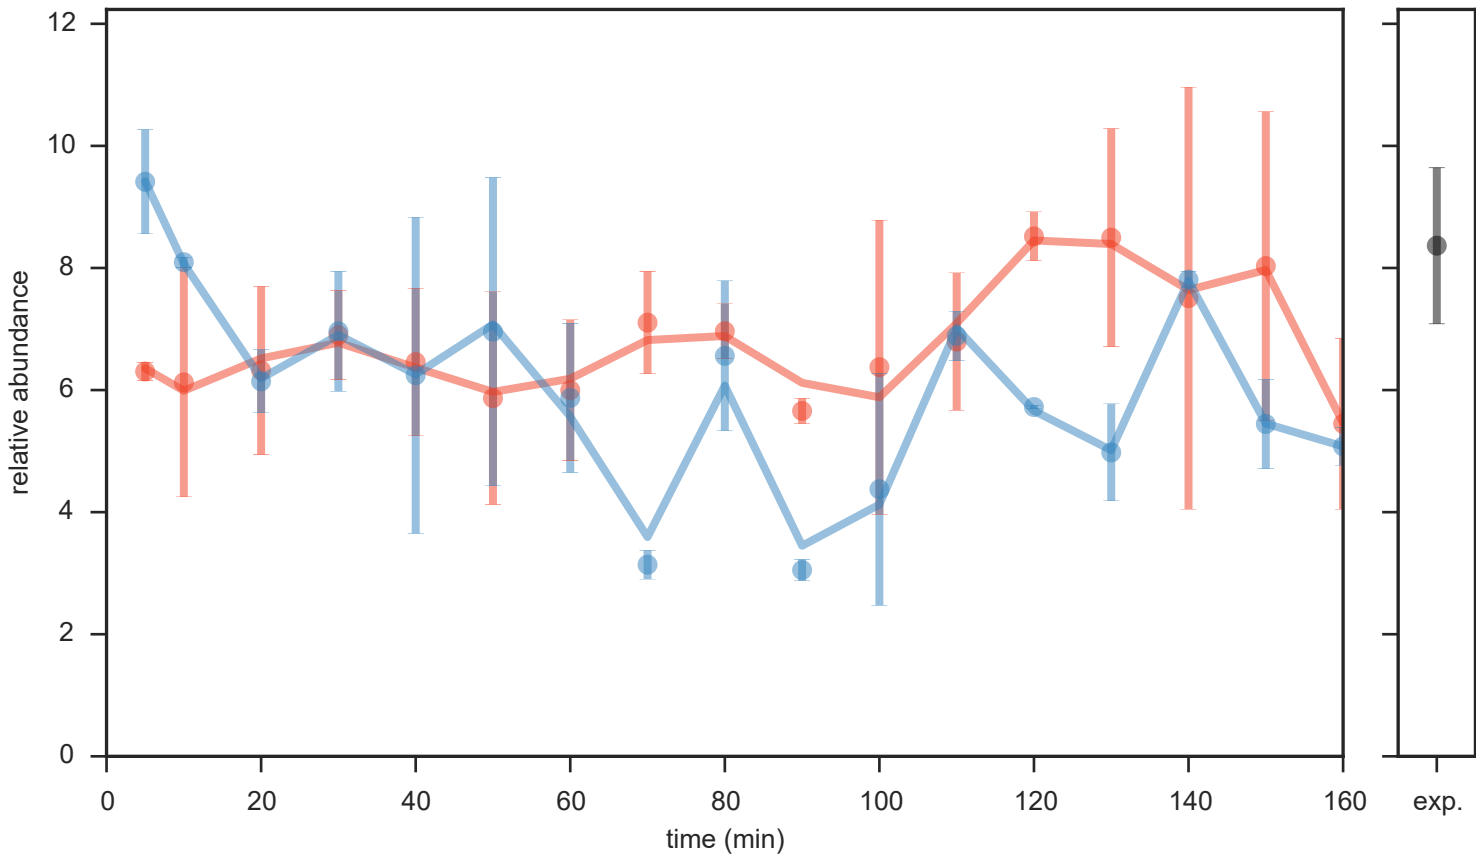

idms\_pid424\_mz278.52

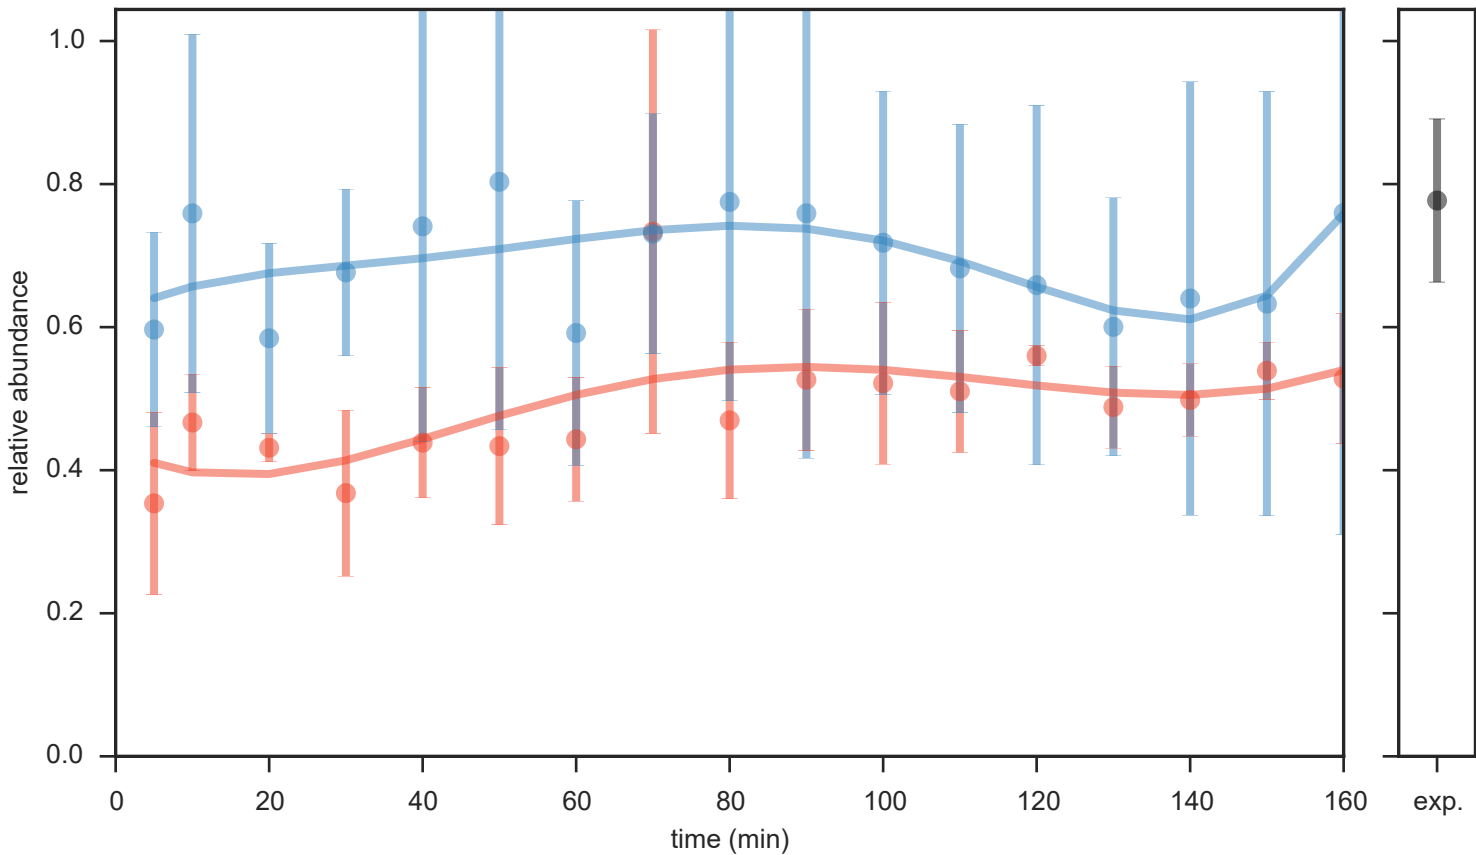

idms\_pid429\_mz235.36

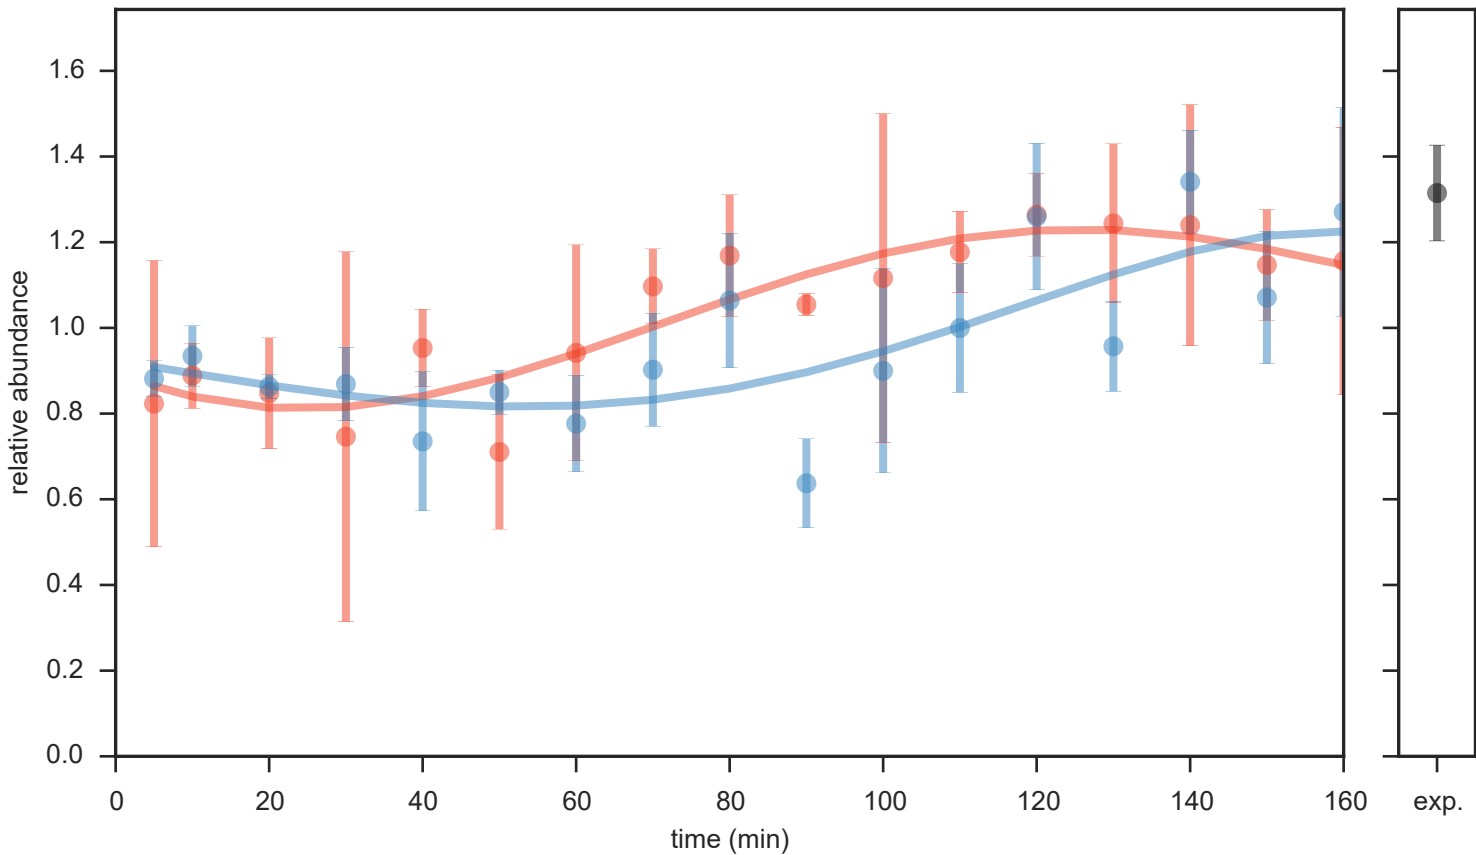

idms\_pid439\_mz240.91

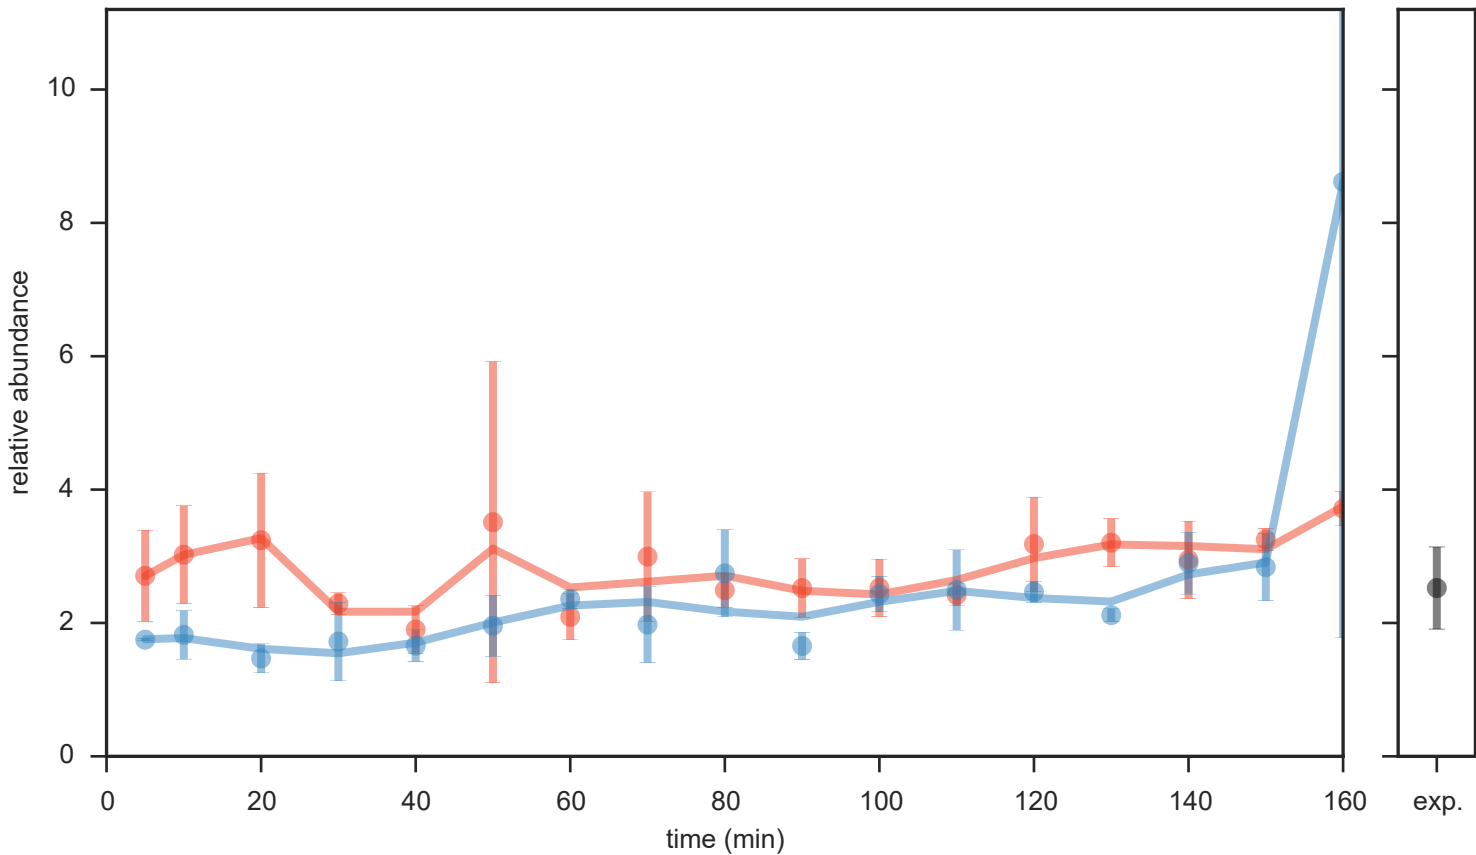



idms\_pid444\_mz168.98

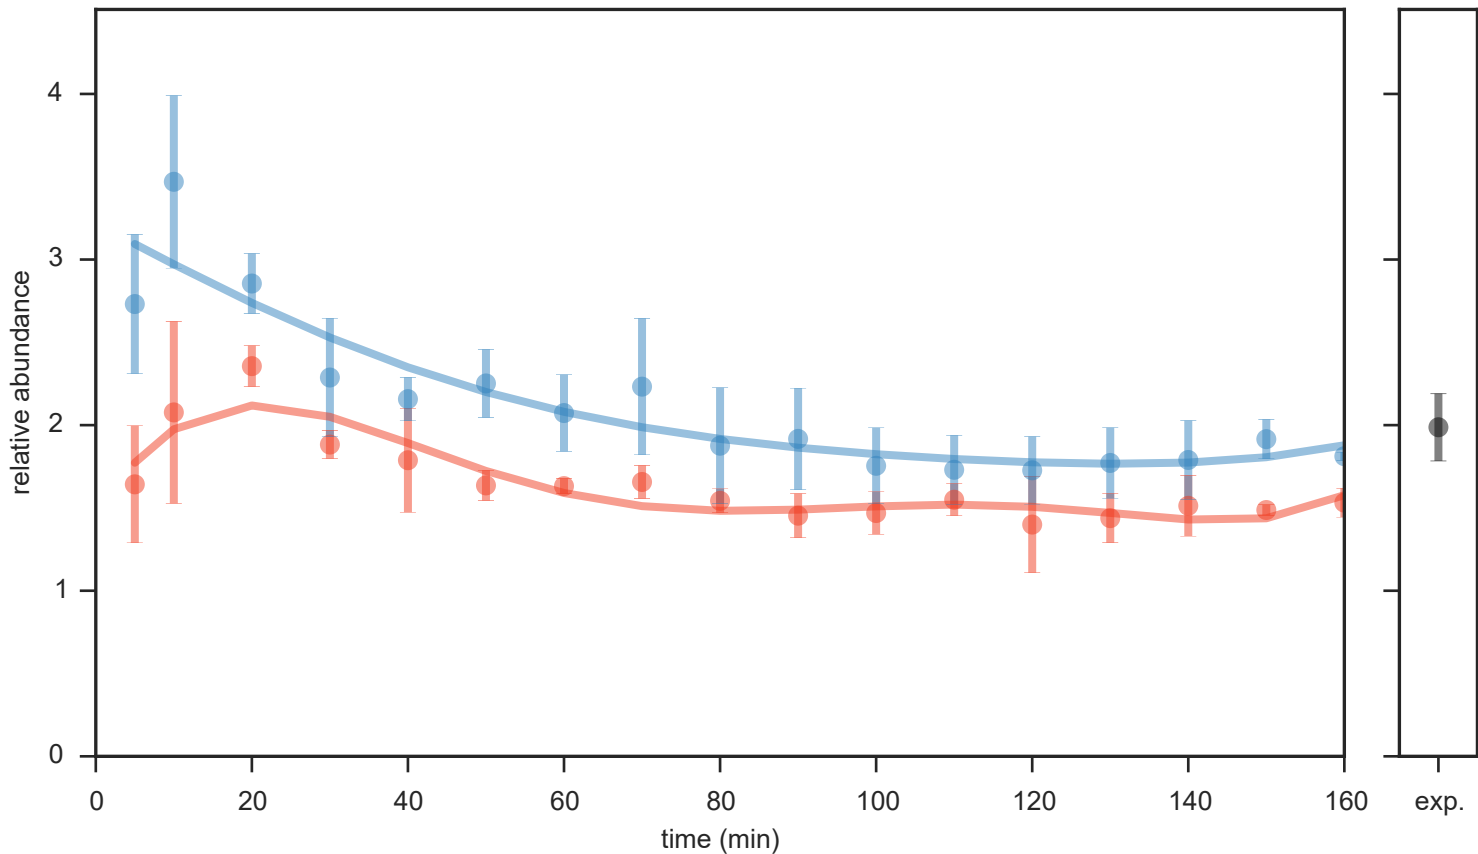

idms\_pid446\_mz432.55

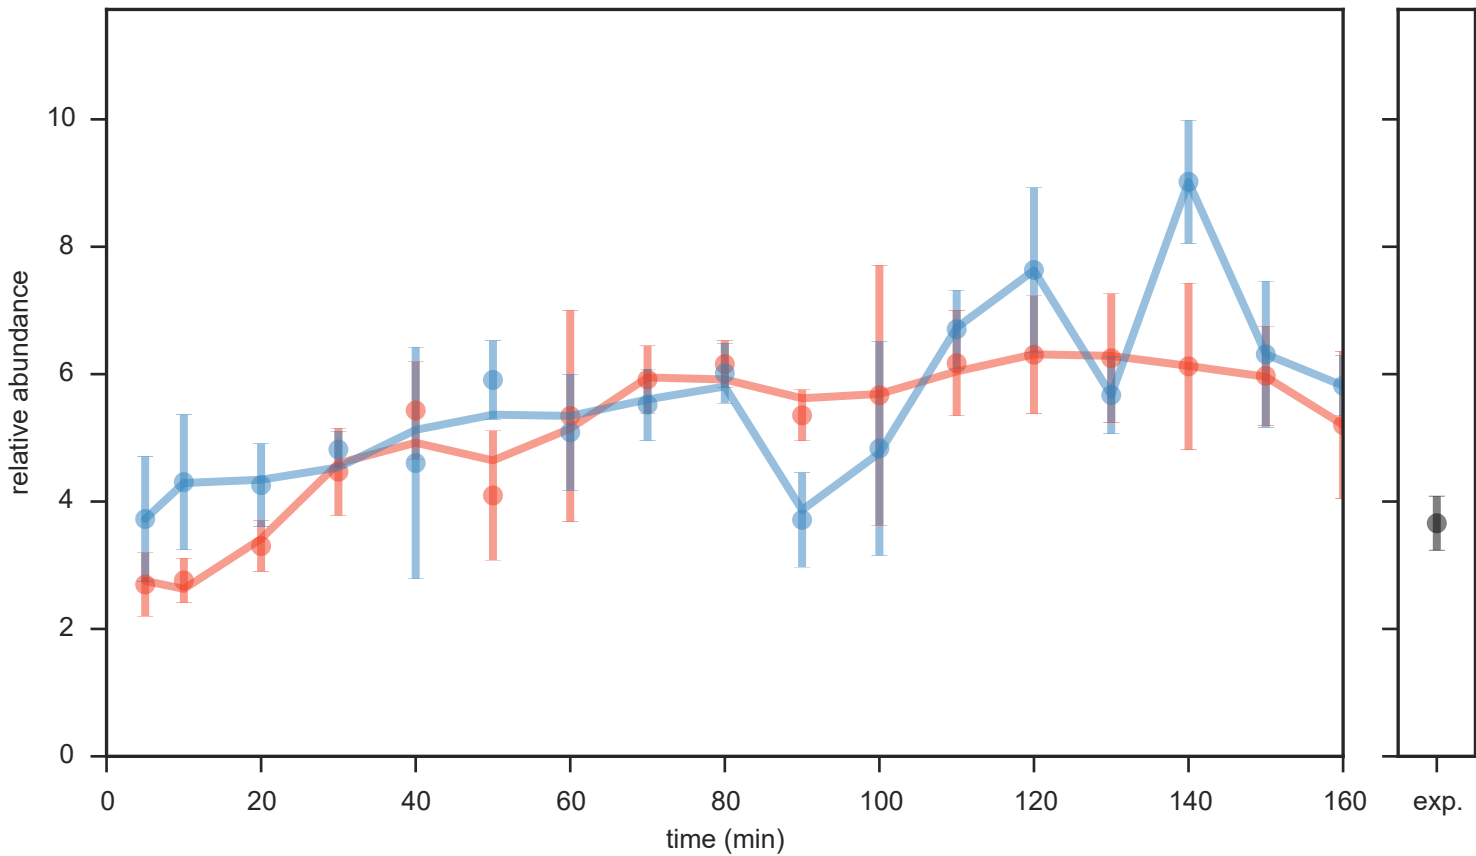

idms\_pid448\_mz166.04

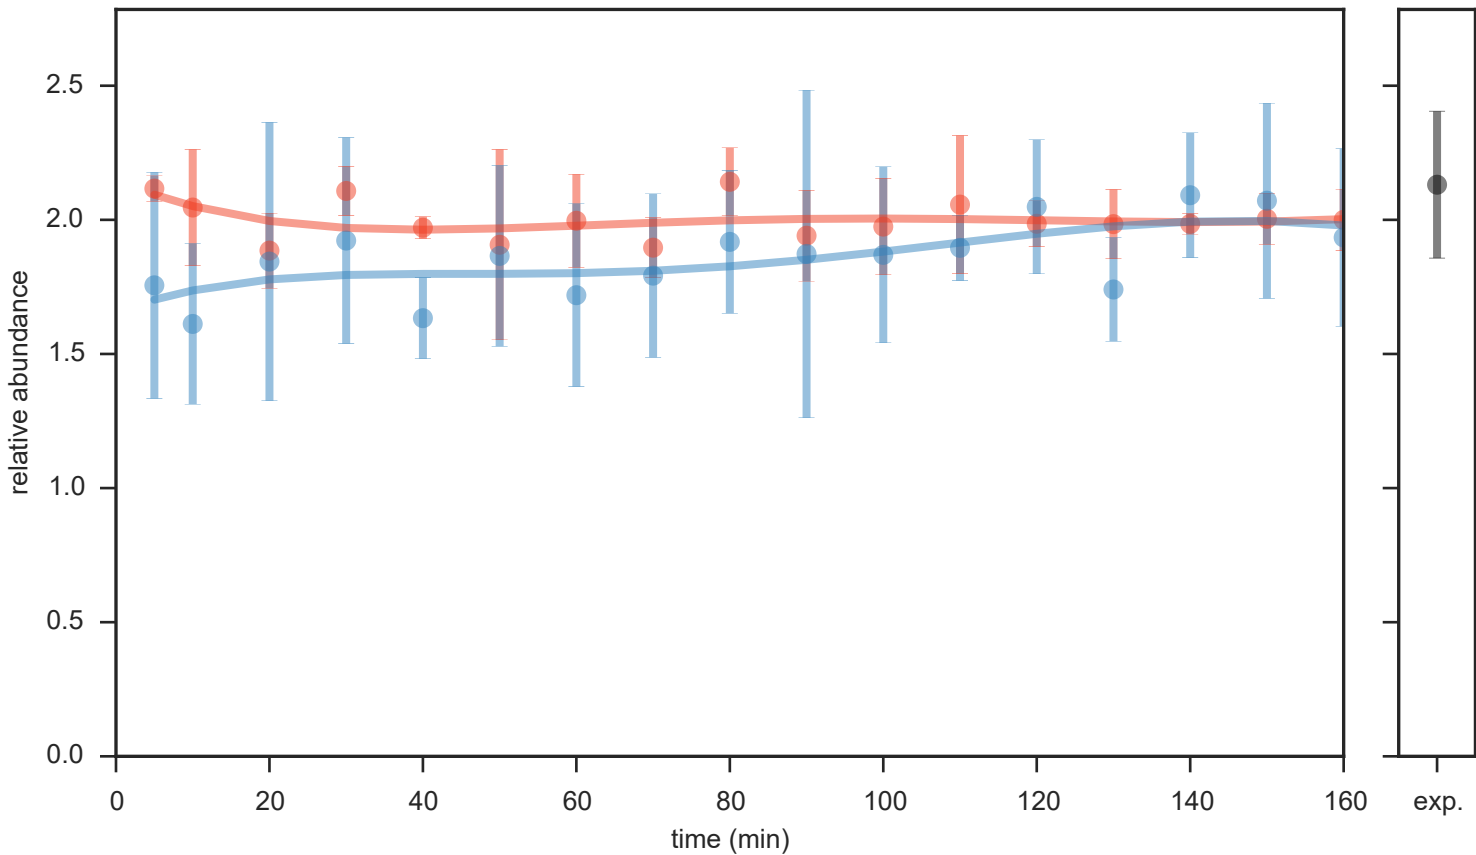

idms\_pid450\_mz260.91

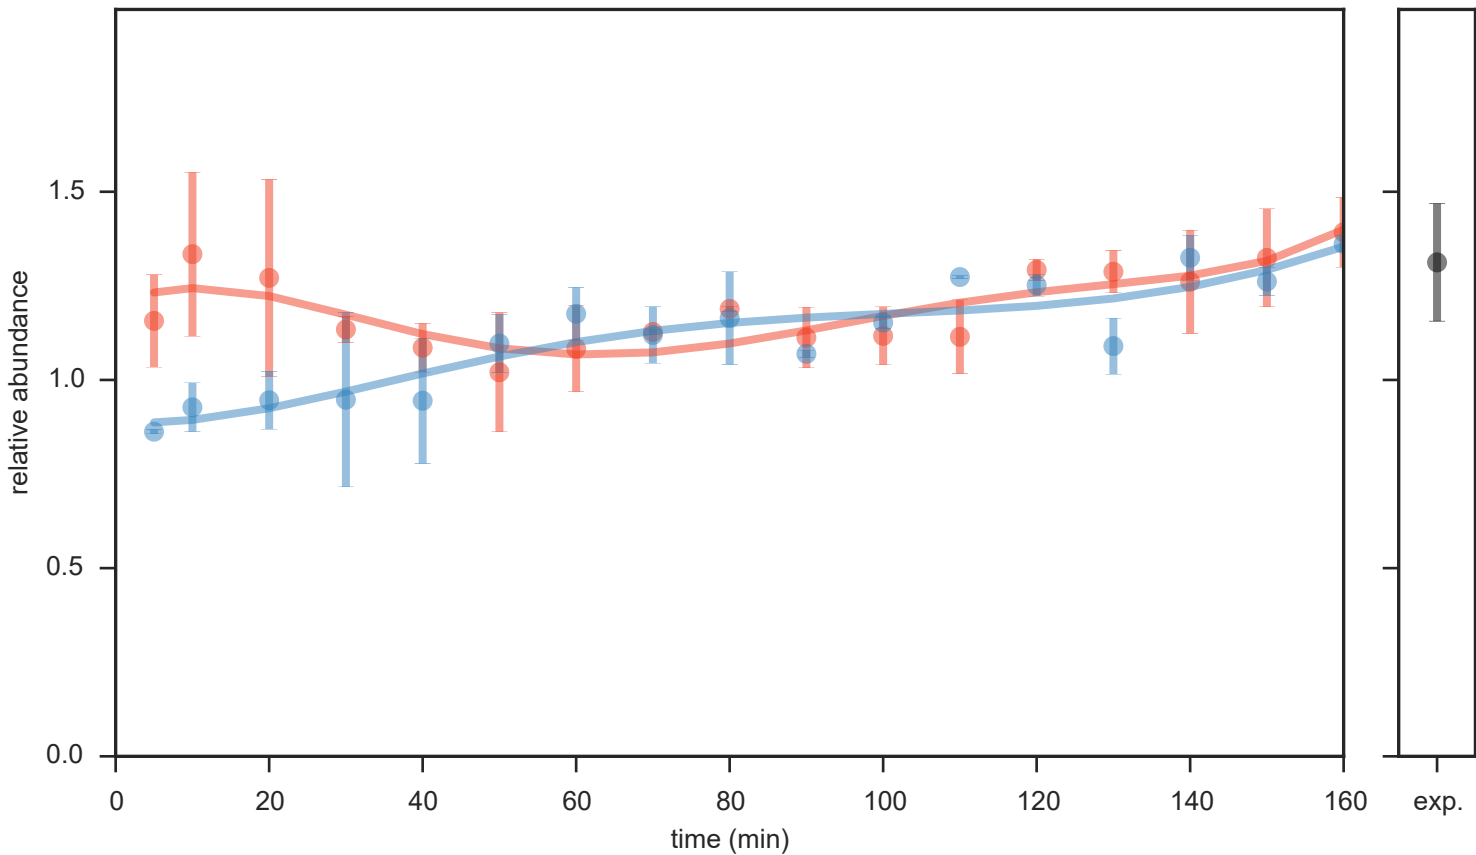

idms\_pid451\_mz246.01

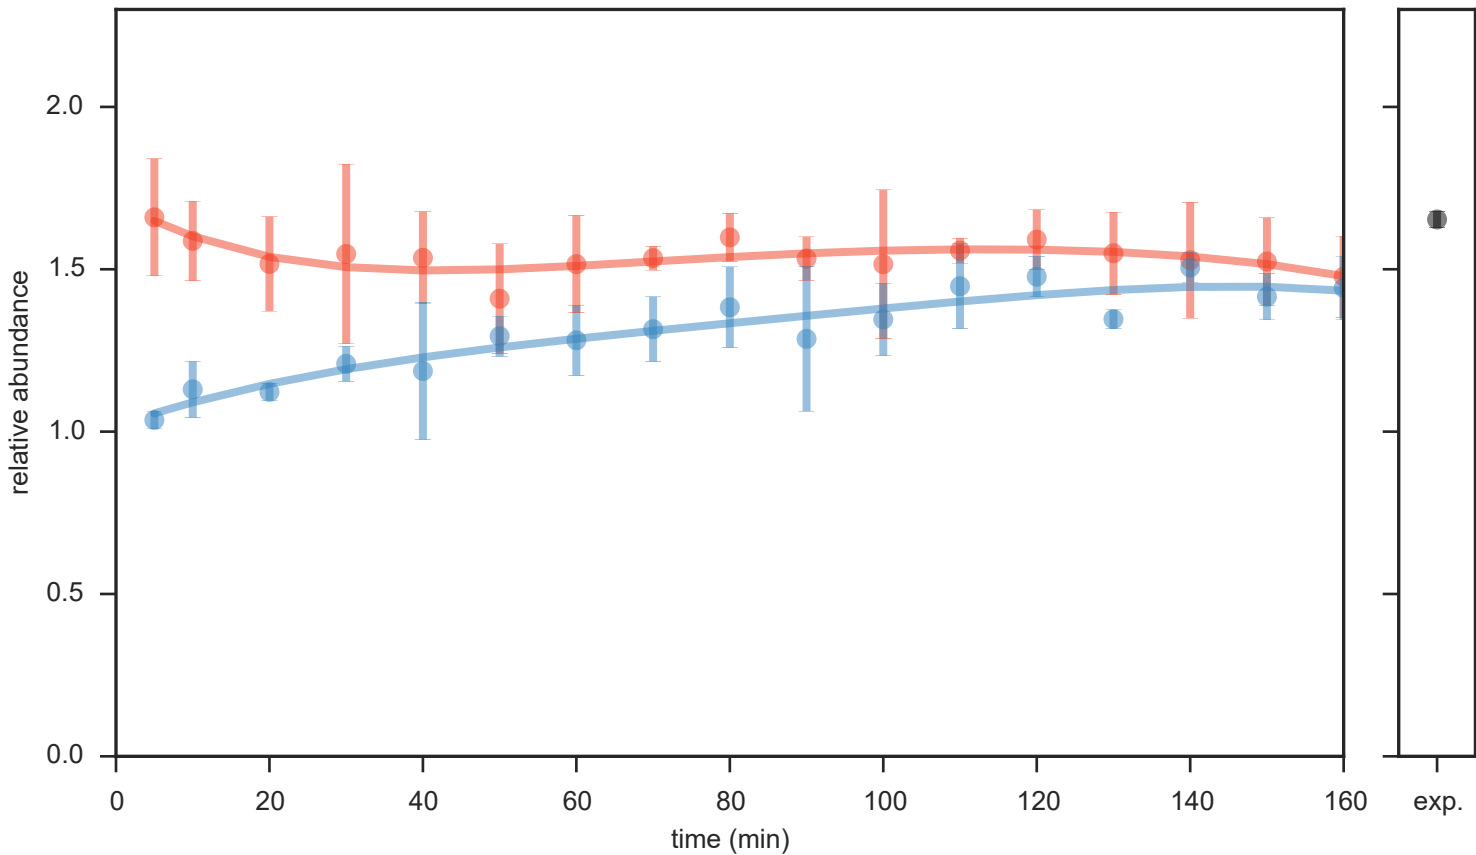

idms\_pid458\_mz145.01

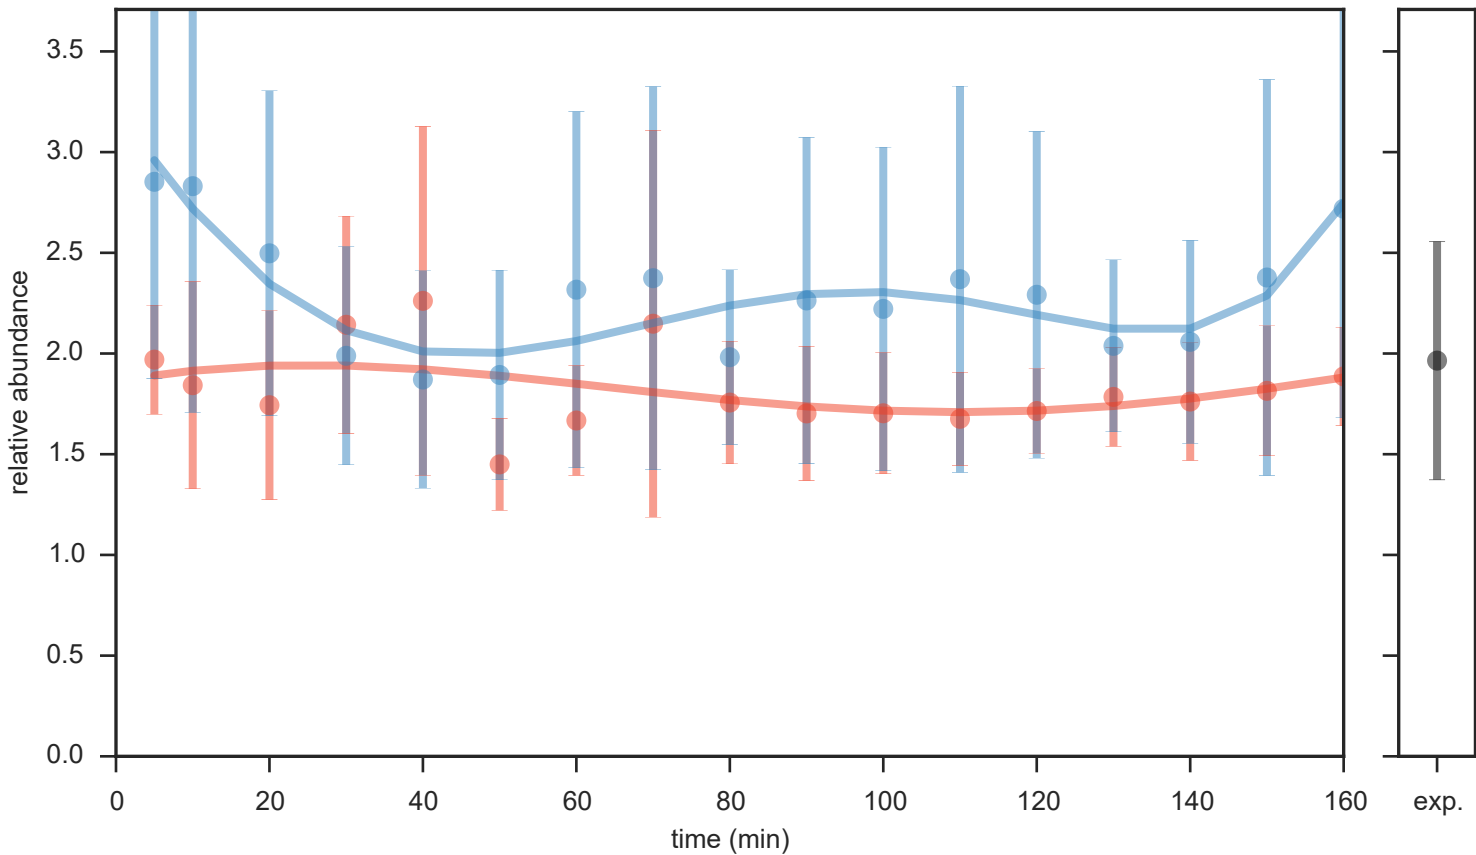

idms\_pid462\_mz207.02

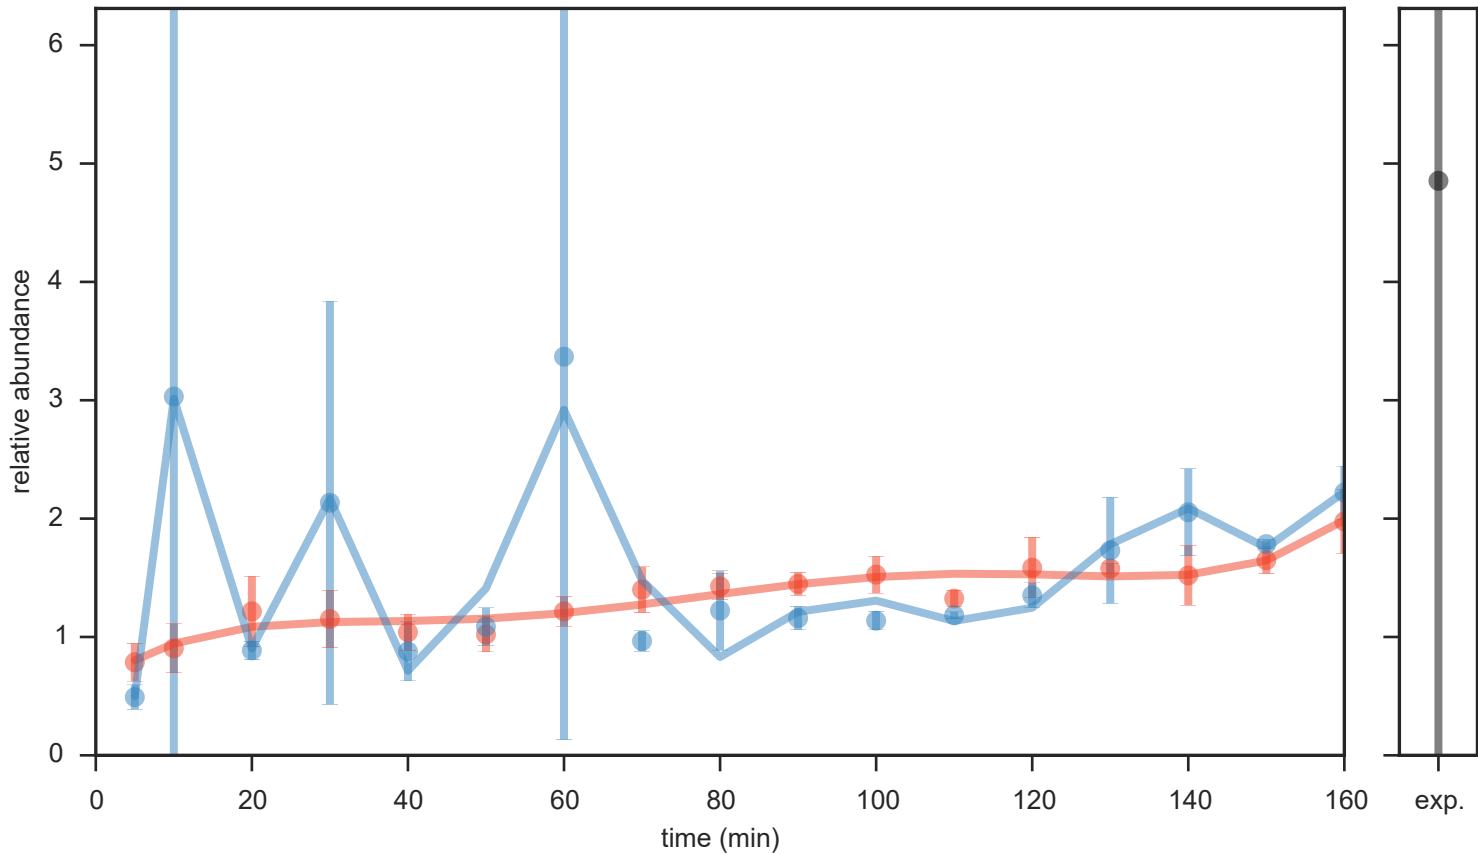

idms\_pid465\_mz208.49

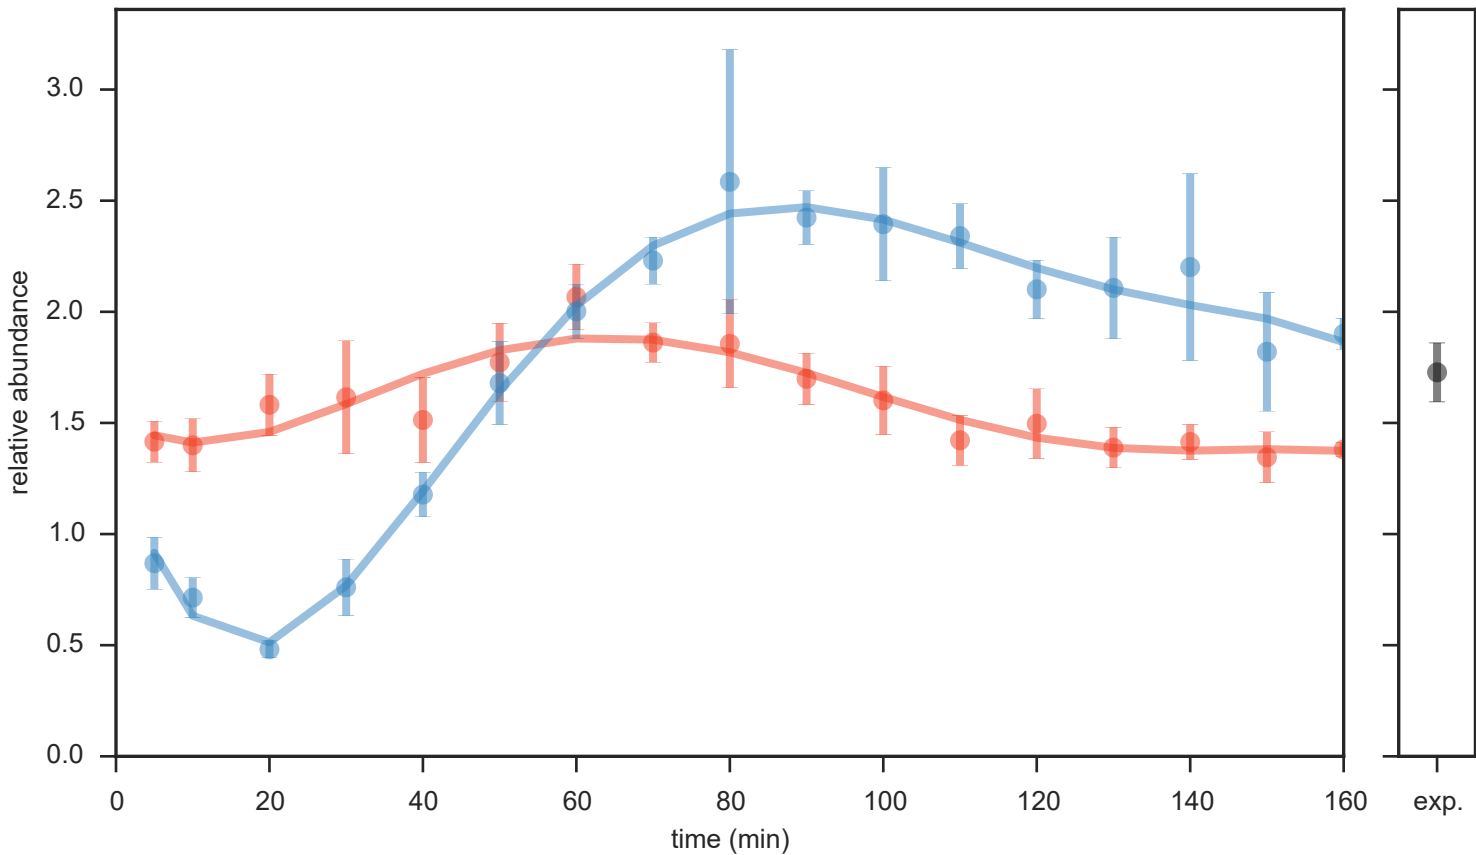



idms\_pid466\_mz321.45

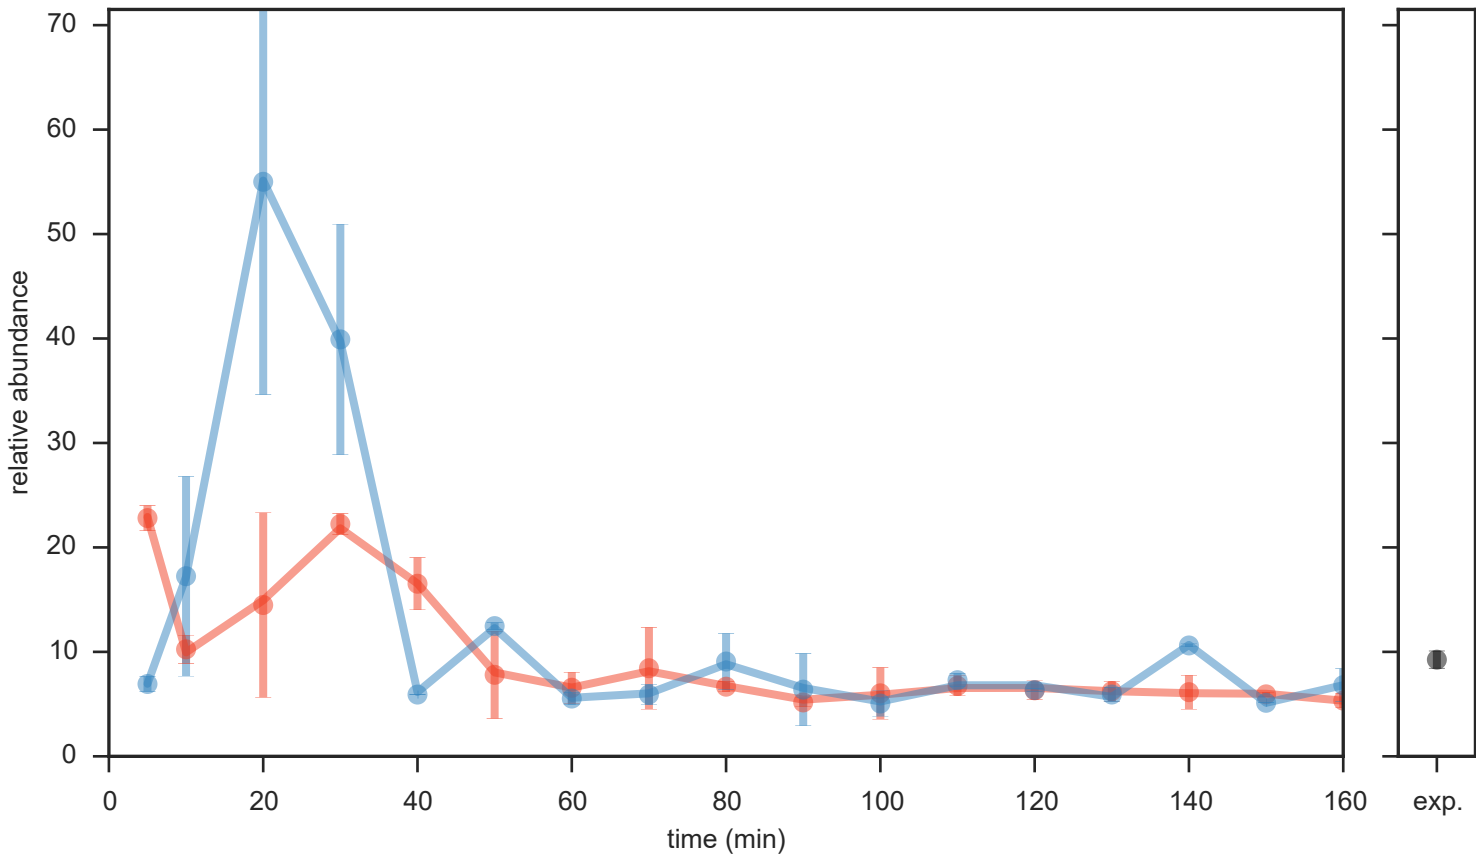

idms\_pid470\_mz134.04

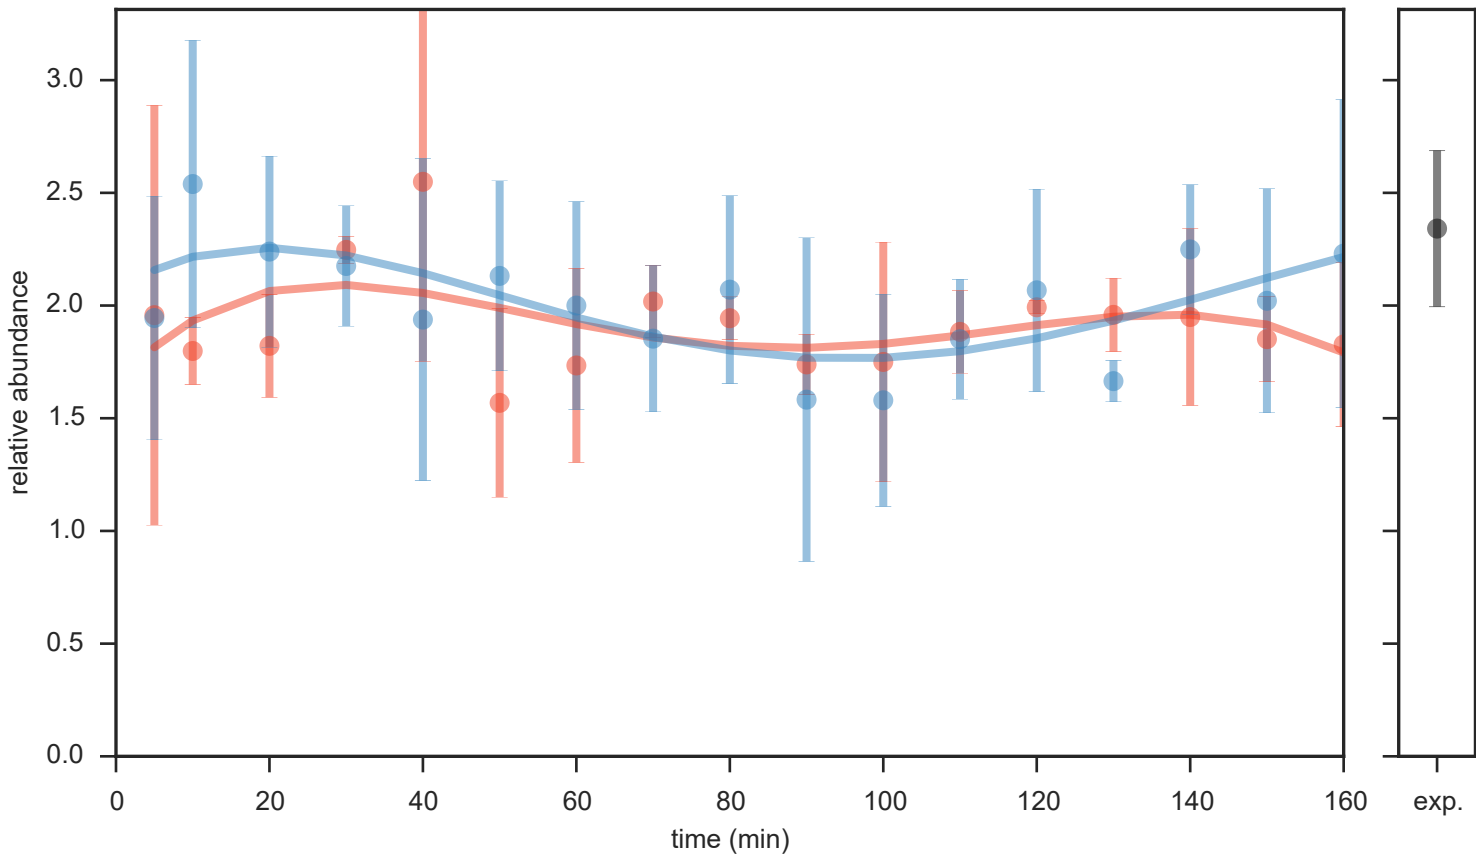

idms\_pid477\_mz349.05

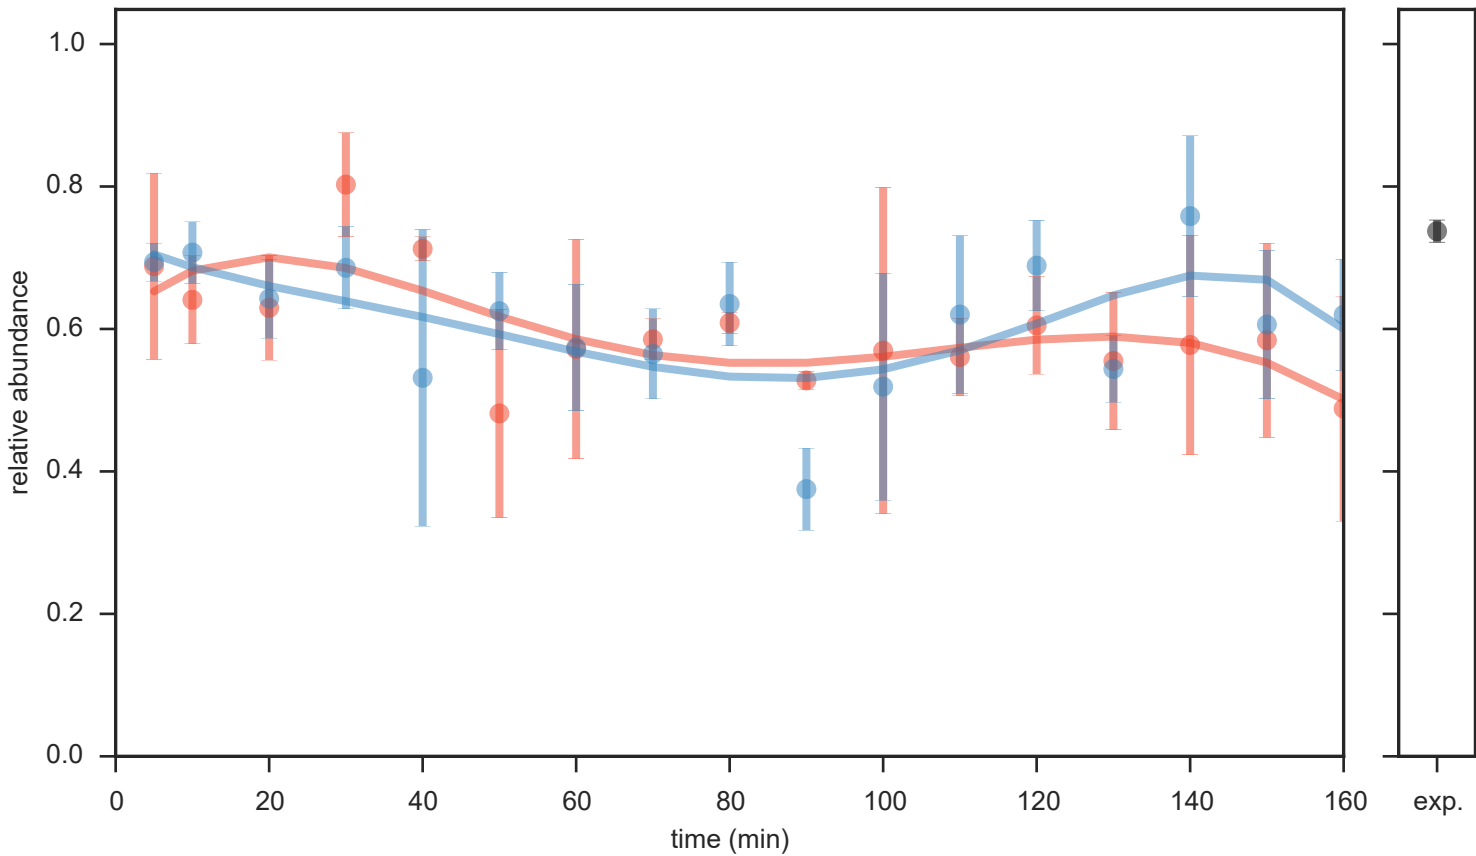

idms\_pid480\_mz349.41

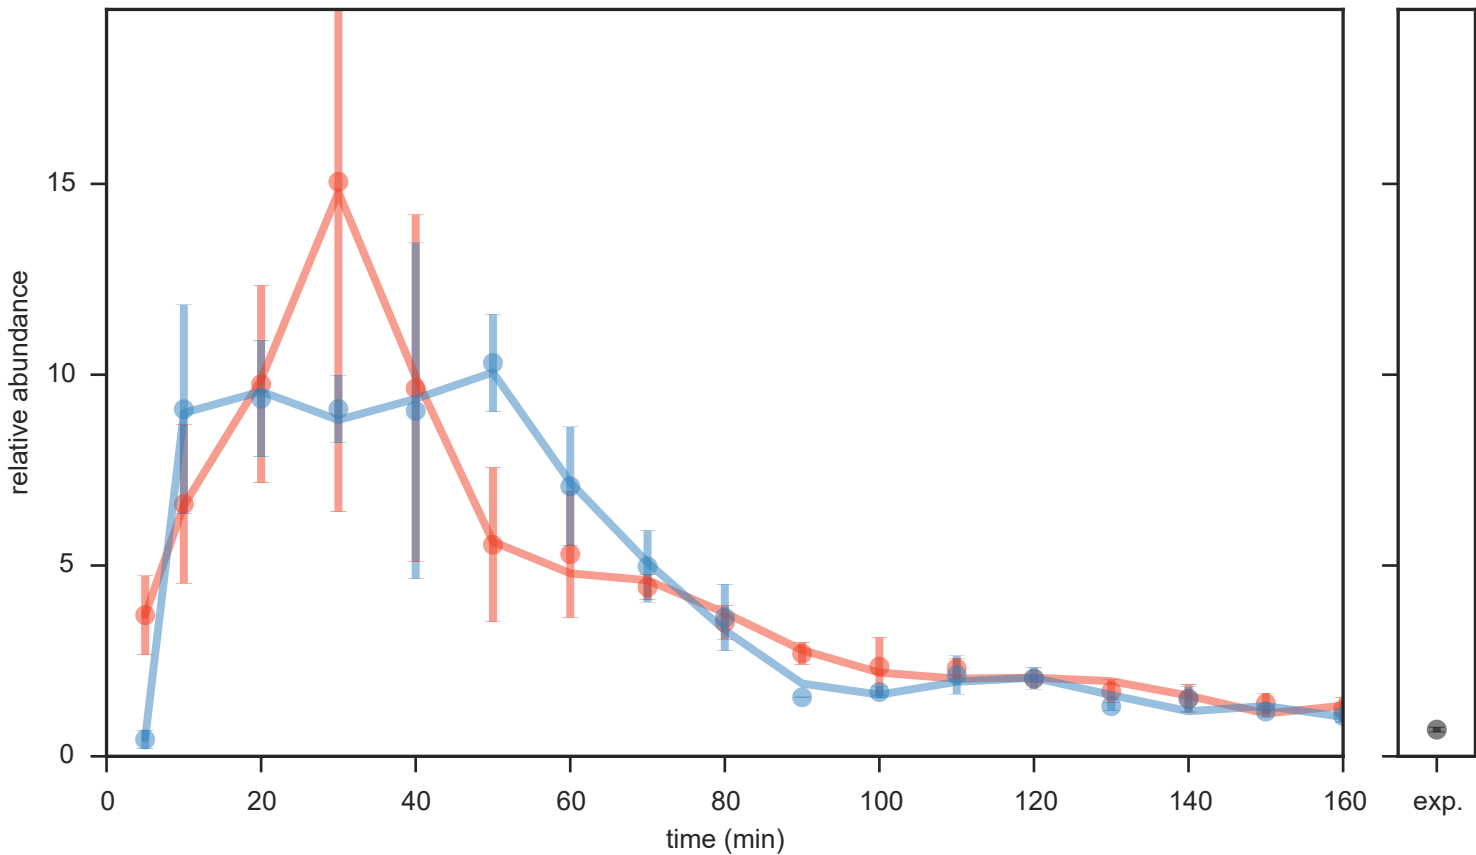

idms\_pid483\_mz247.40

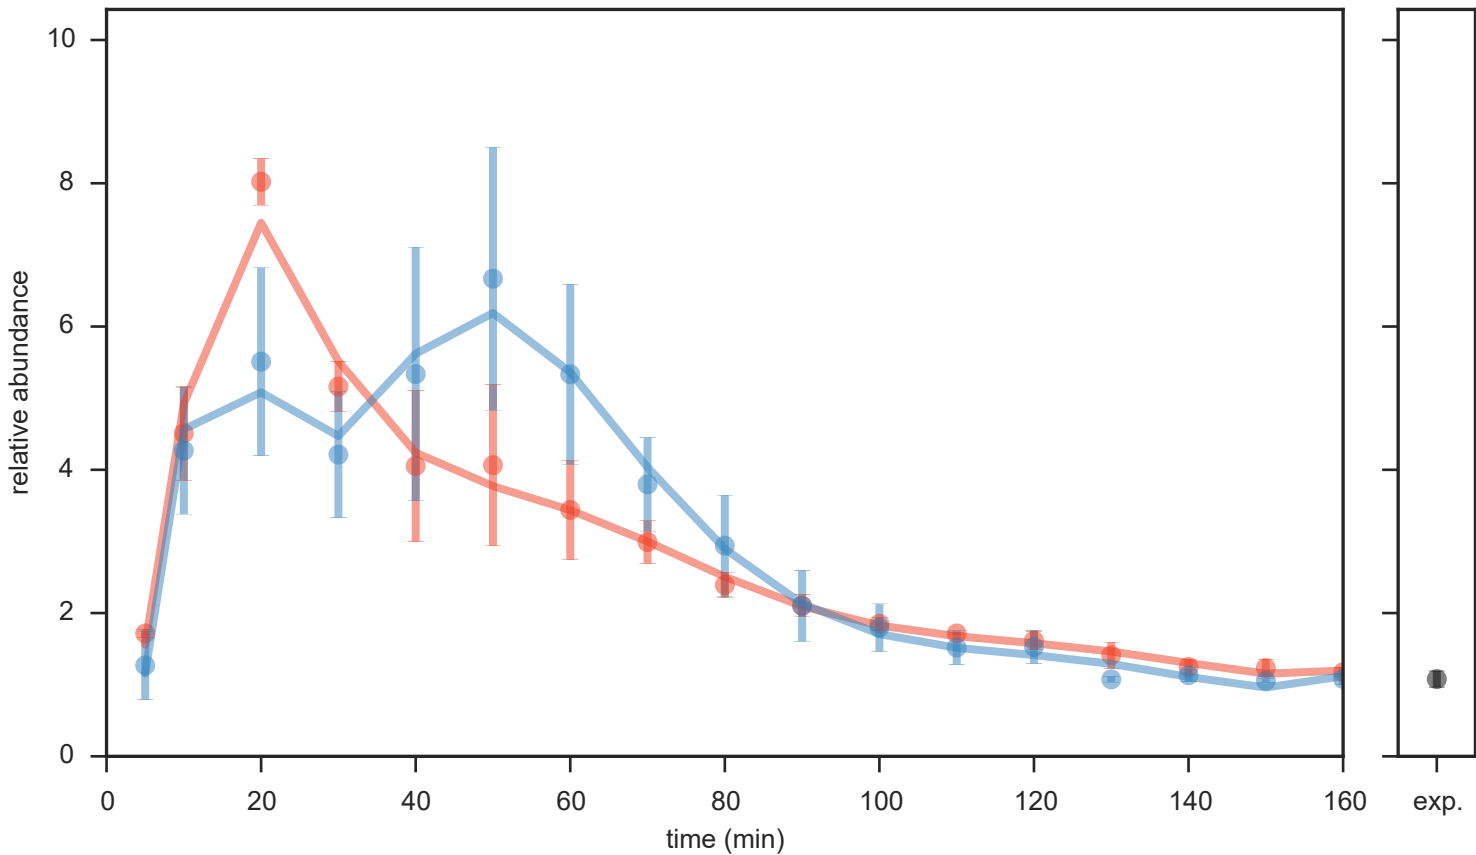

idms\_pid489\_mz338.98

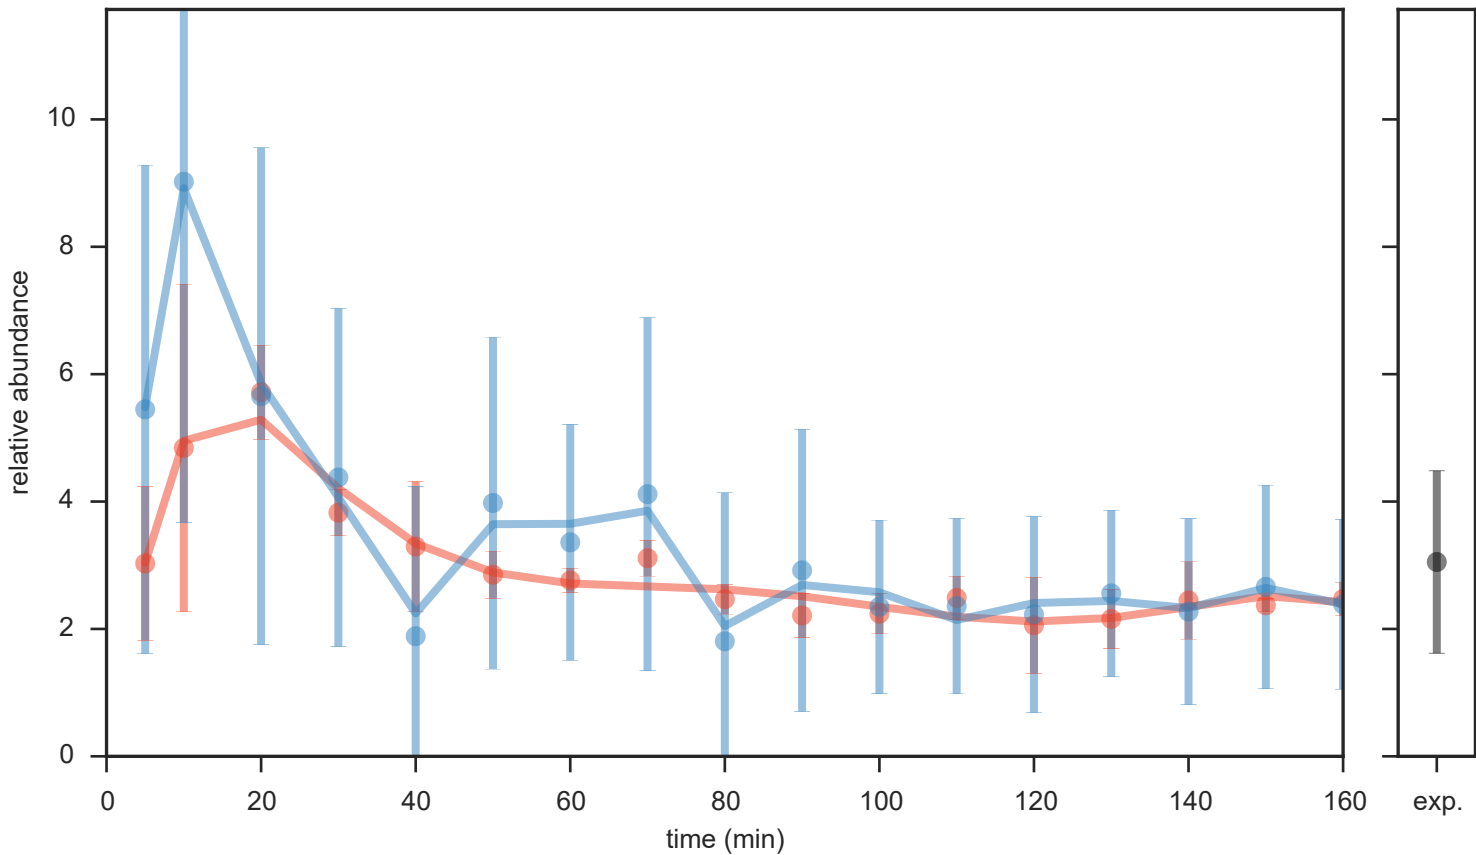

idms\_pid491\_mz760.07

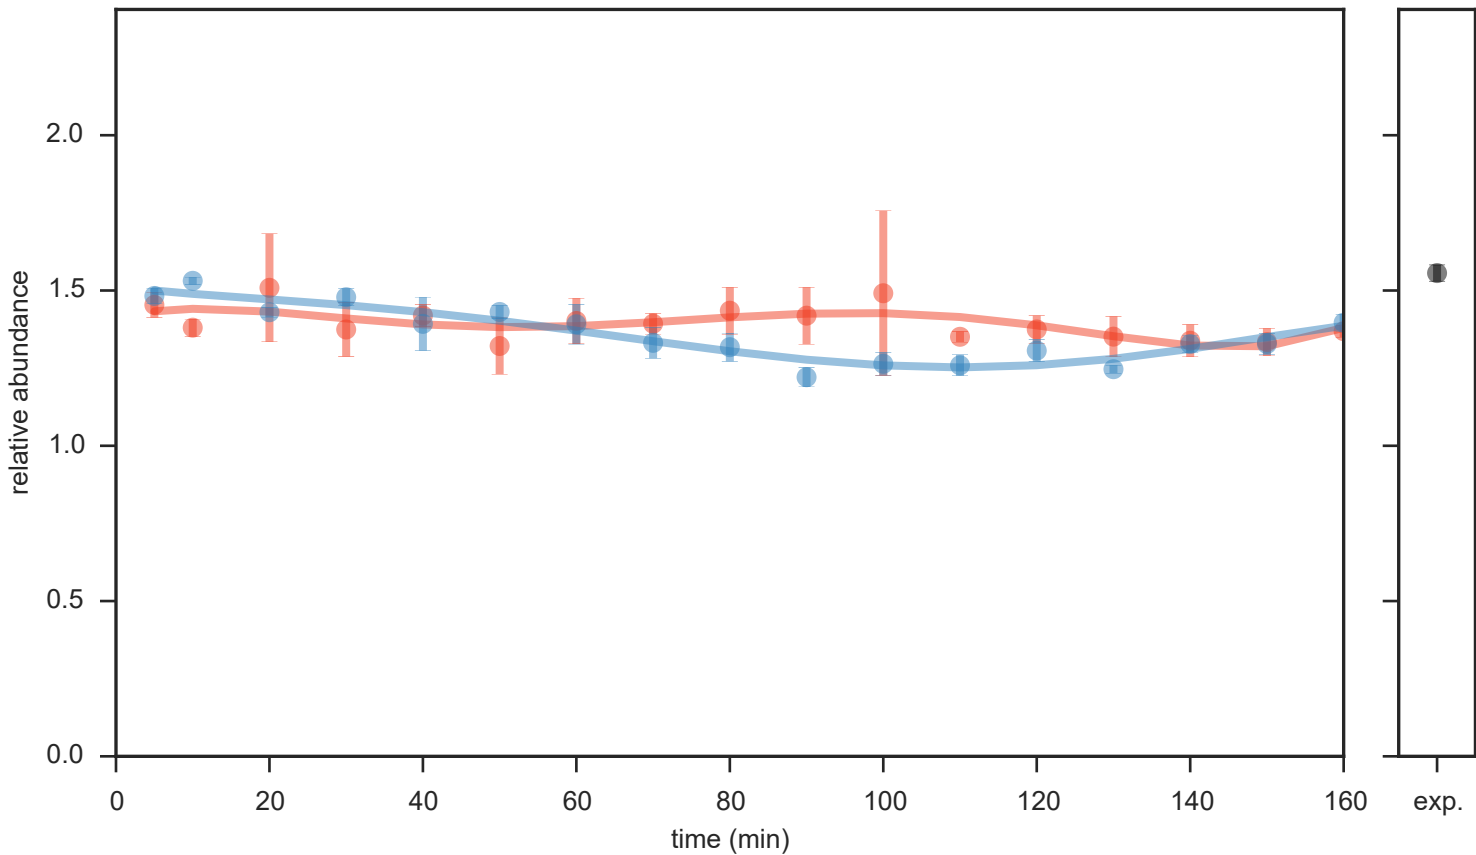

idms\_pid502\_mz348.09

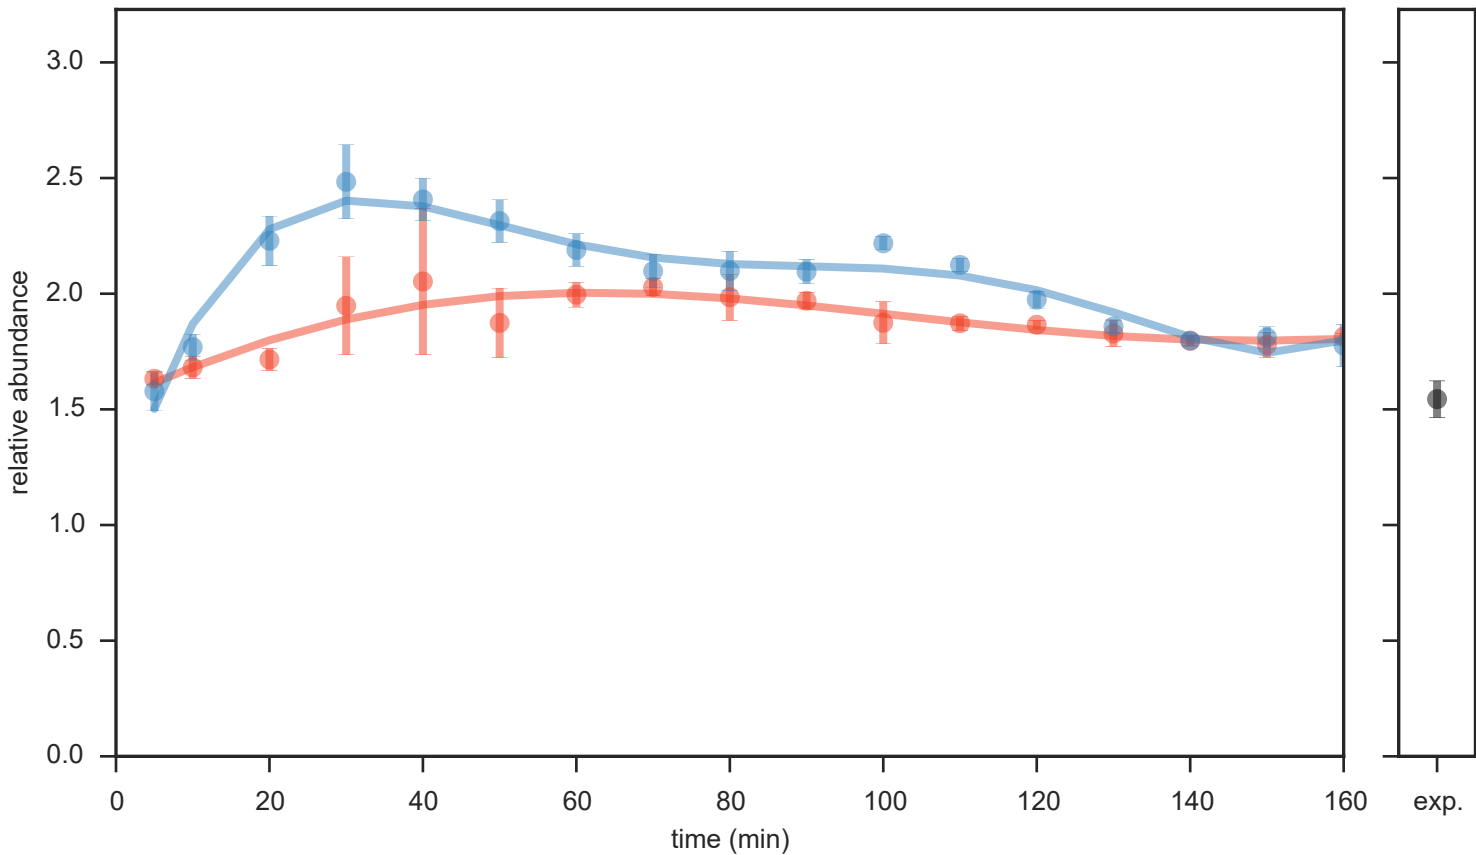



idms\_pid513\_mz344.03

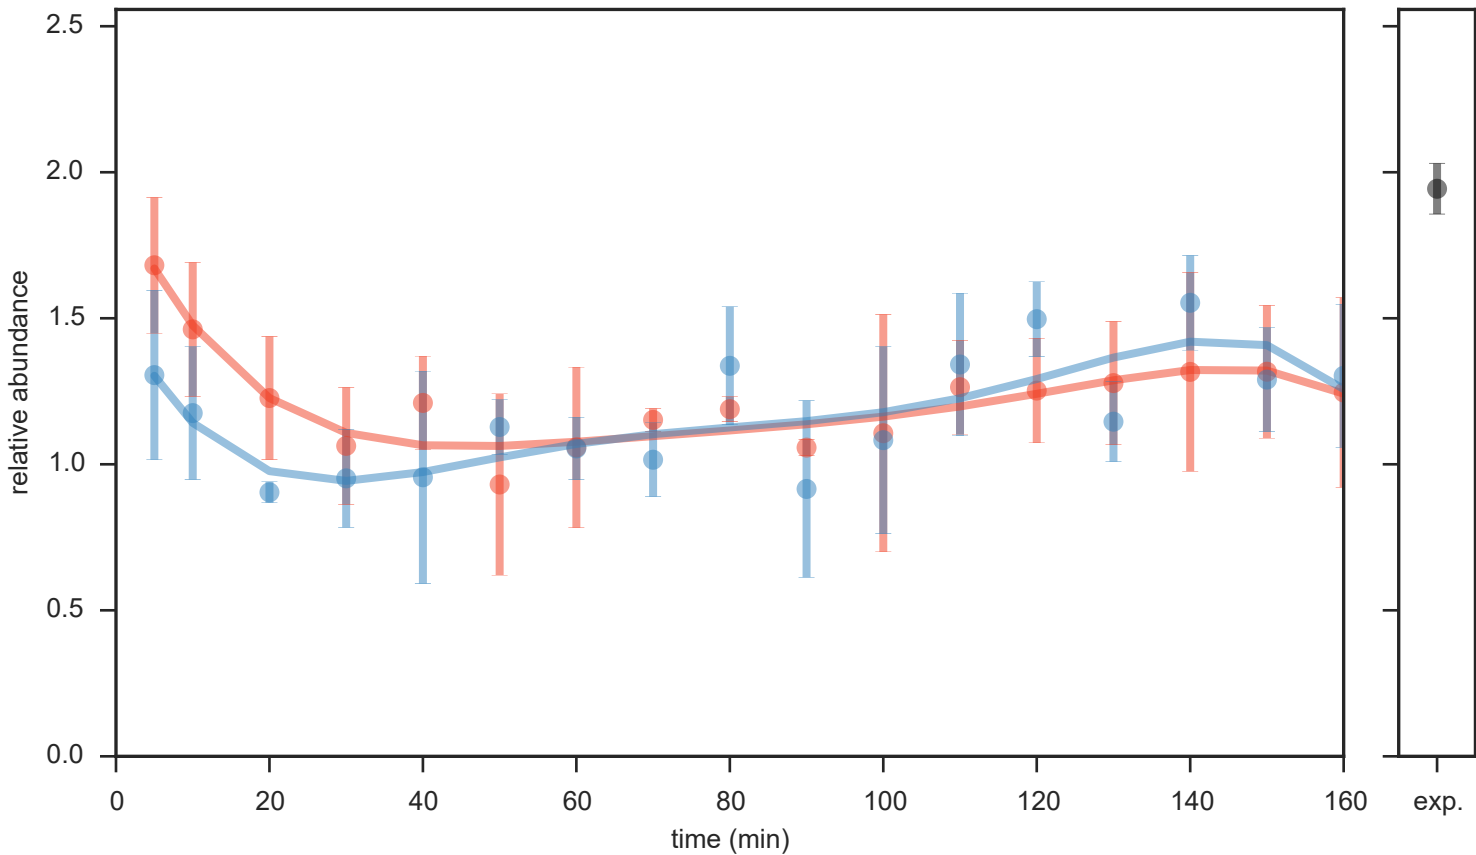

idms\_pid528\_mz332.95

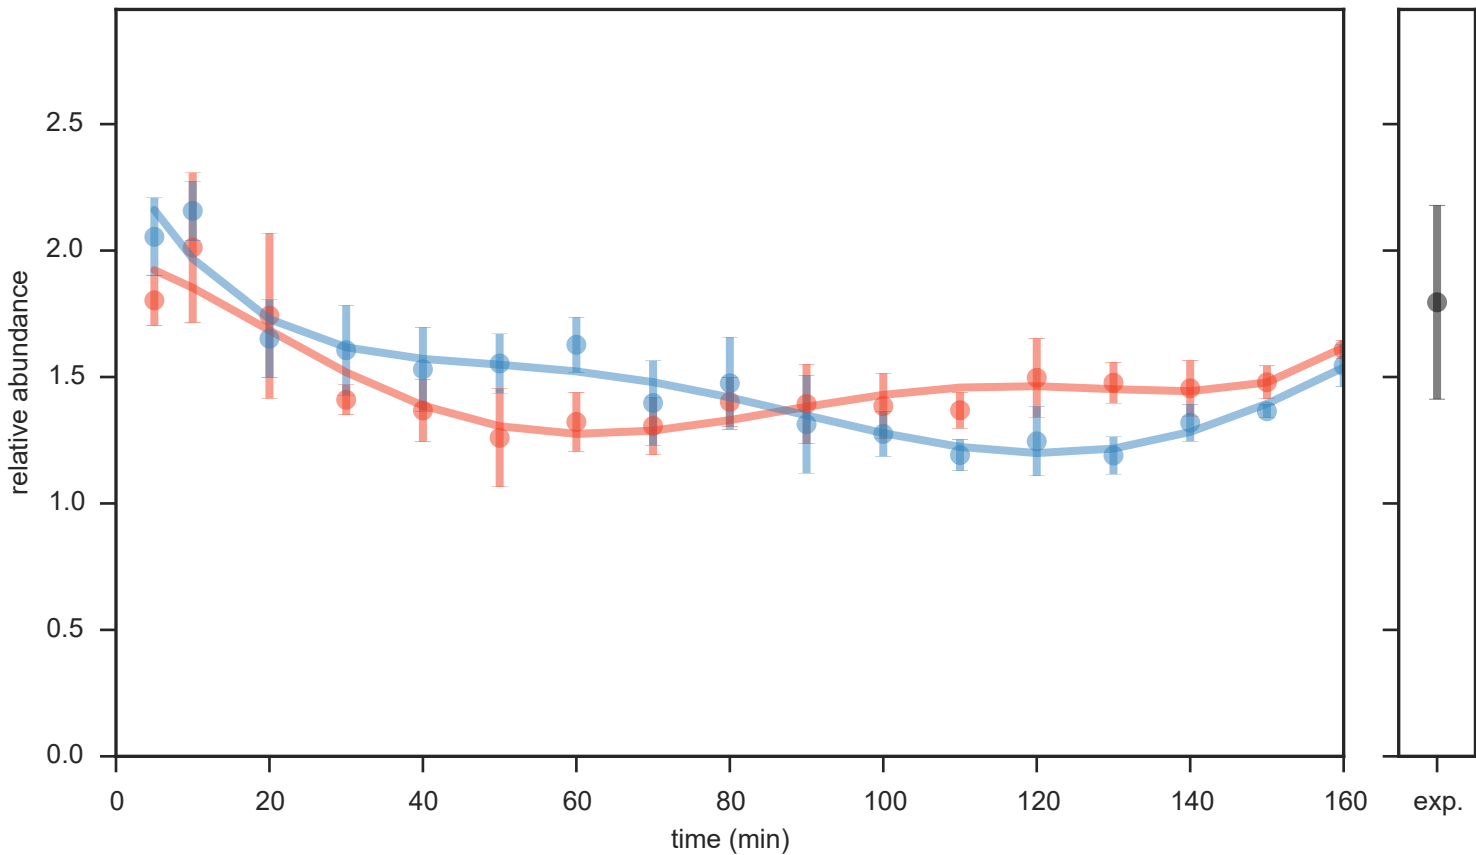

idms\_pid529\_mz240.54

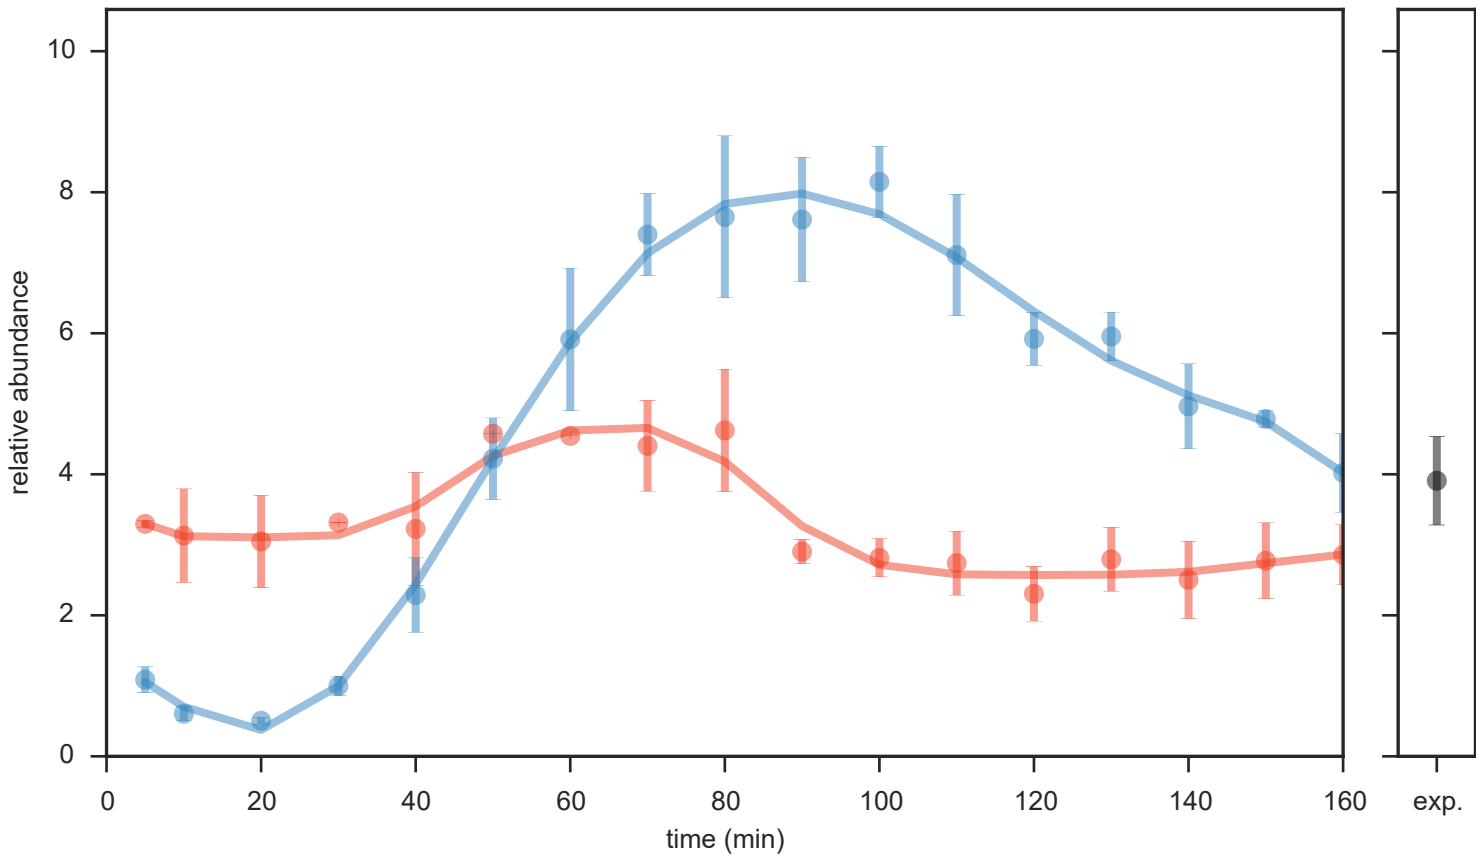

idms\_pid544\_mz410.56

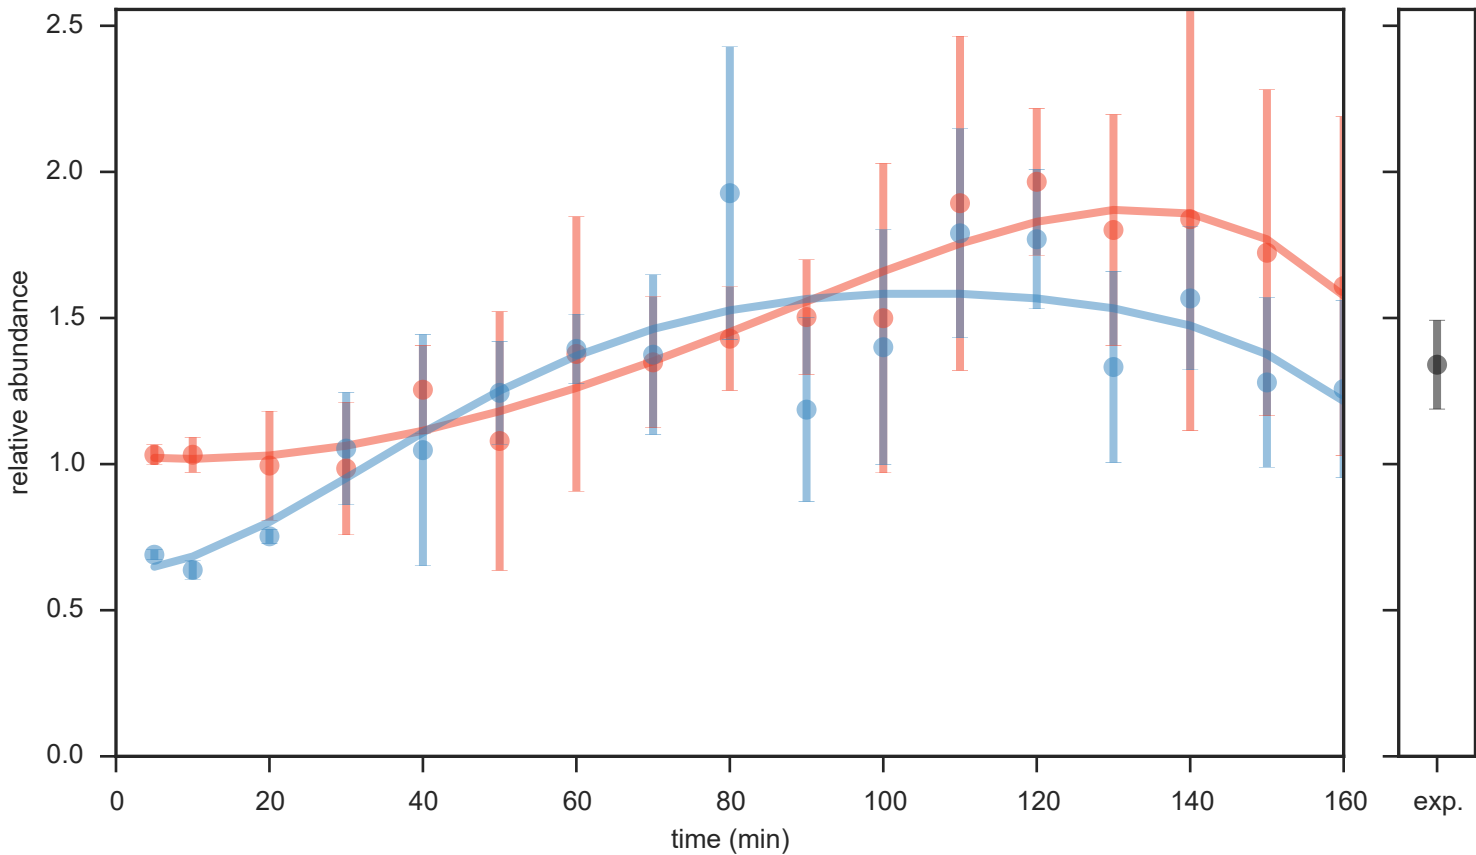

idms\_pid551\_mz318.51

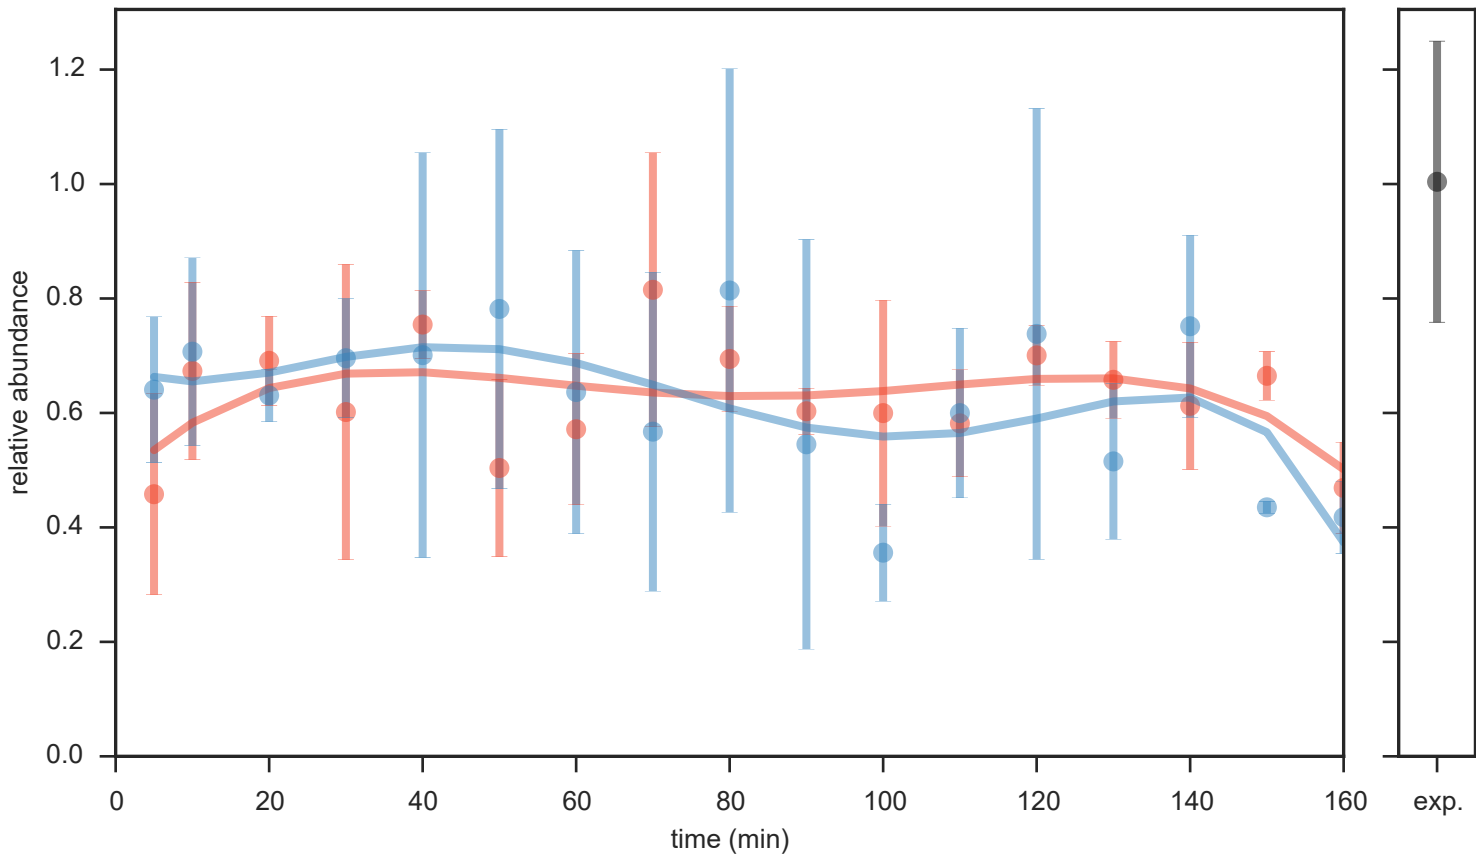

idms\_pid552\_mz398.02

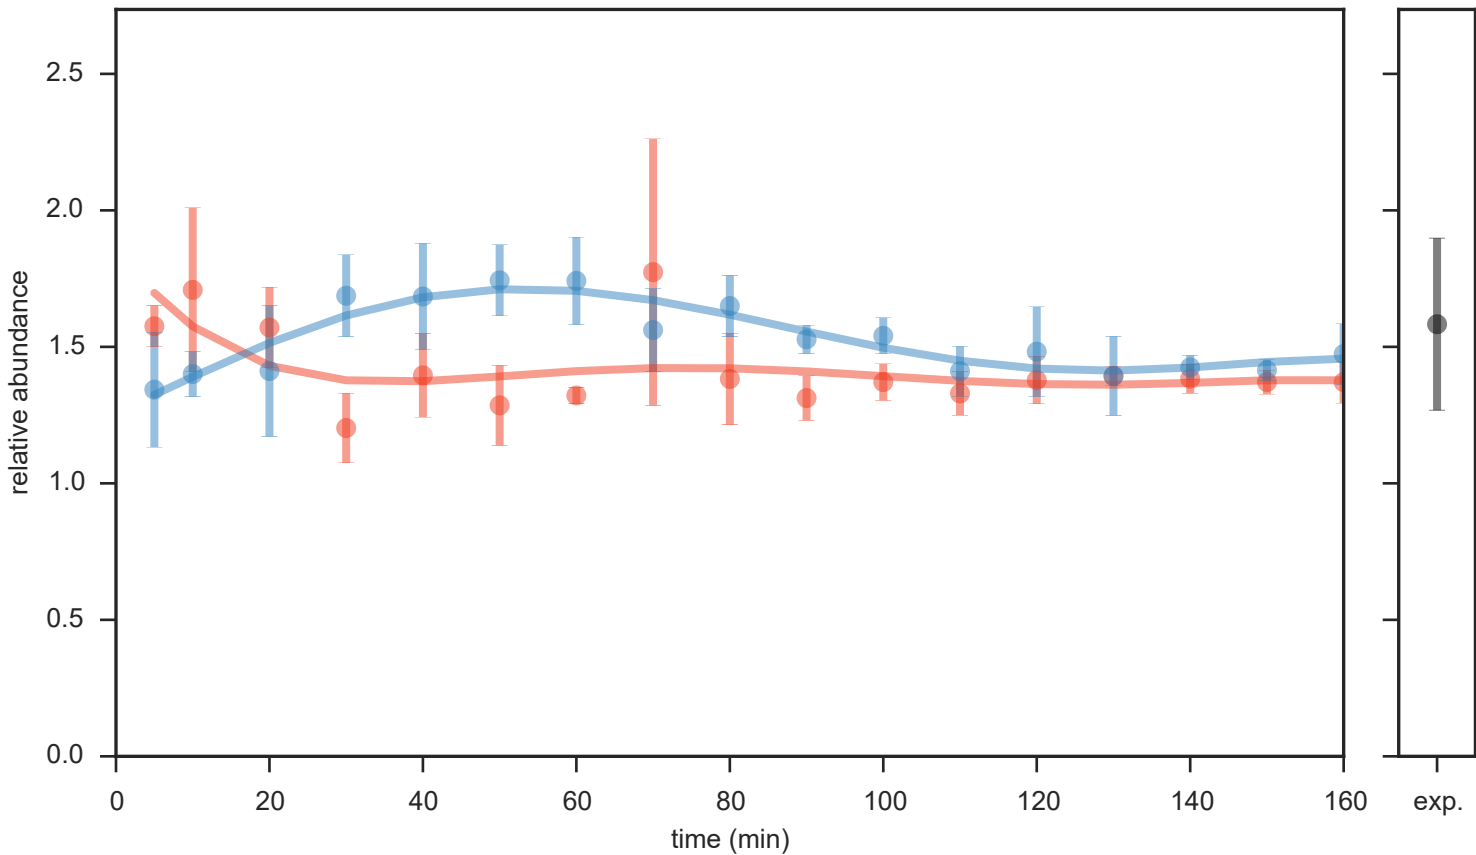

idms\_pid554\_mz323.02

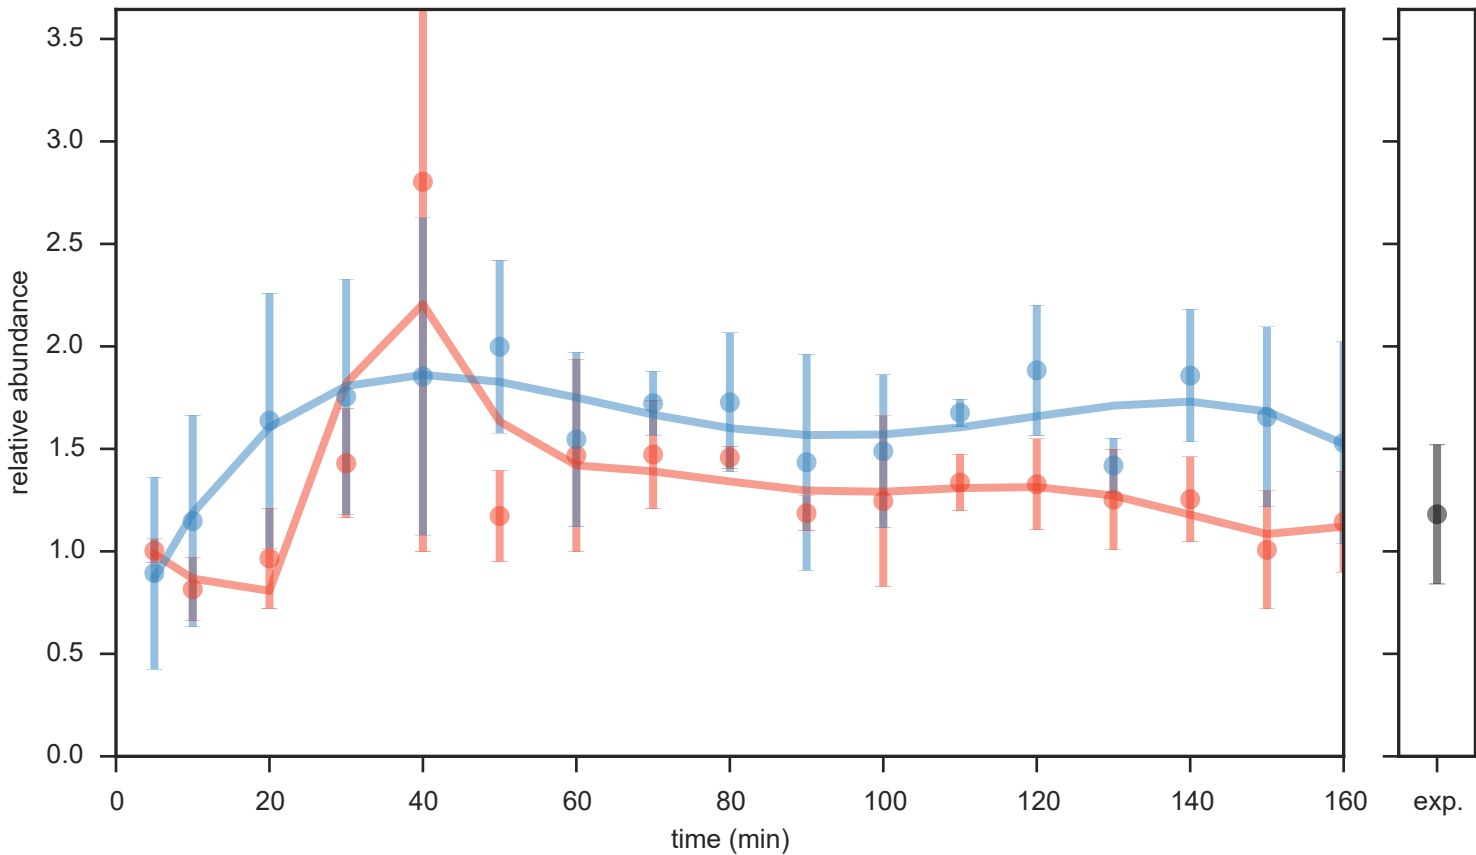

idms\_pid558\_mz299.38

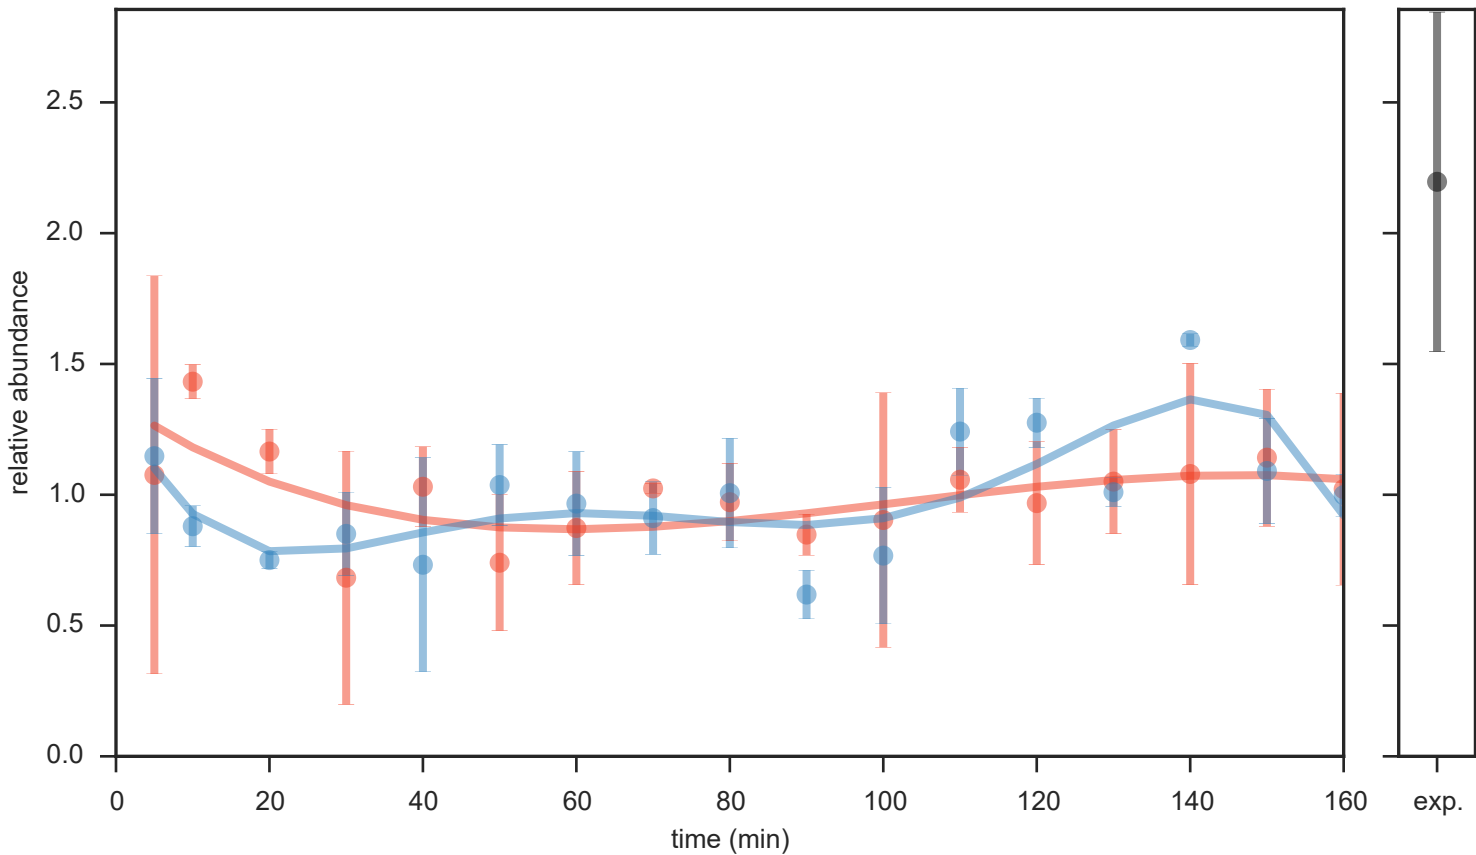



idms\_pid560\_mz195.04

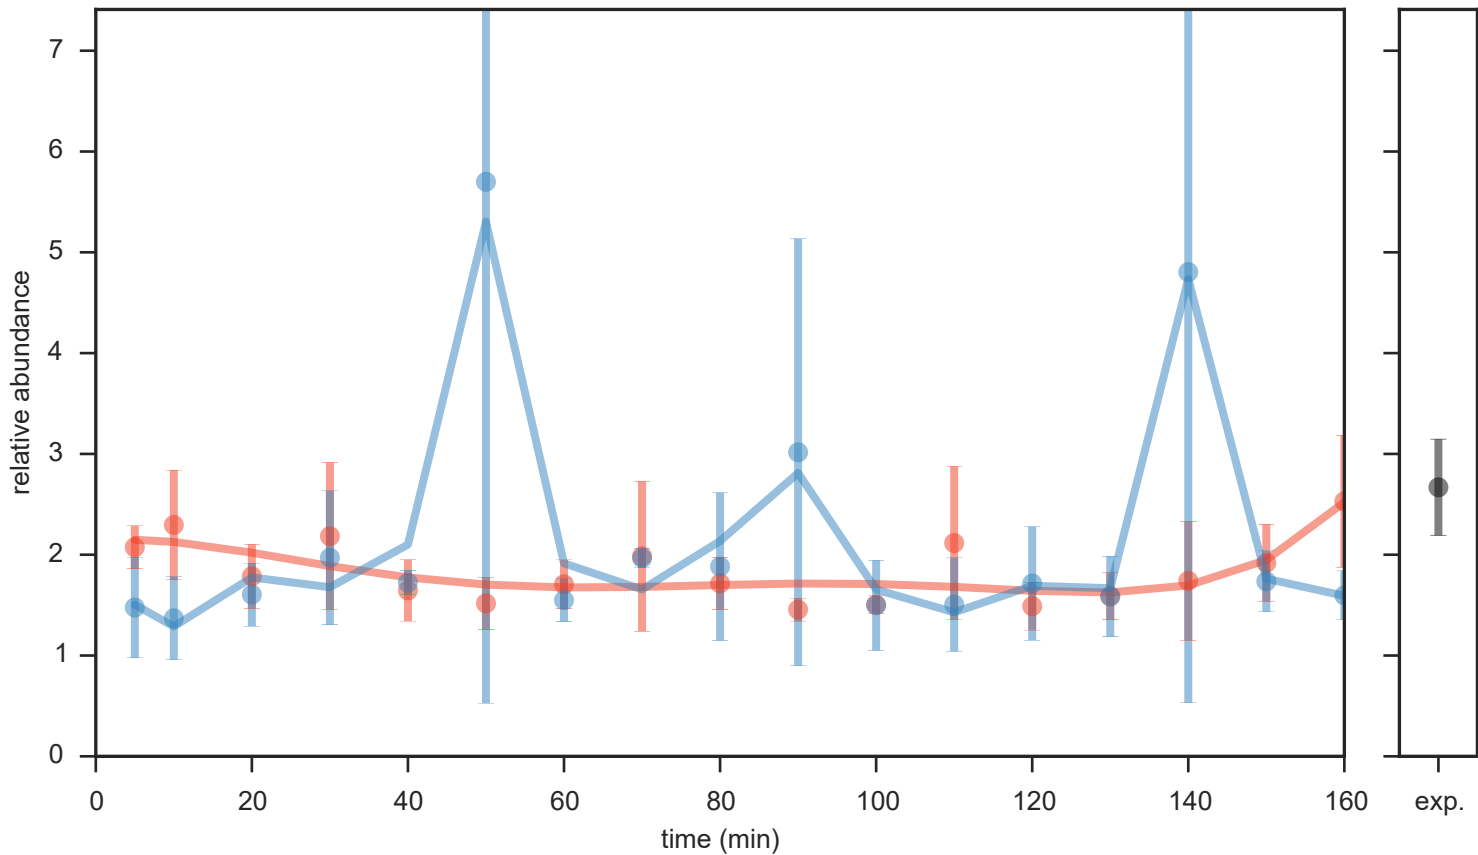

idms\_pid563\_mz295.76

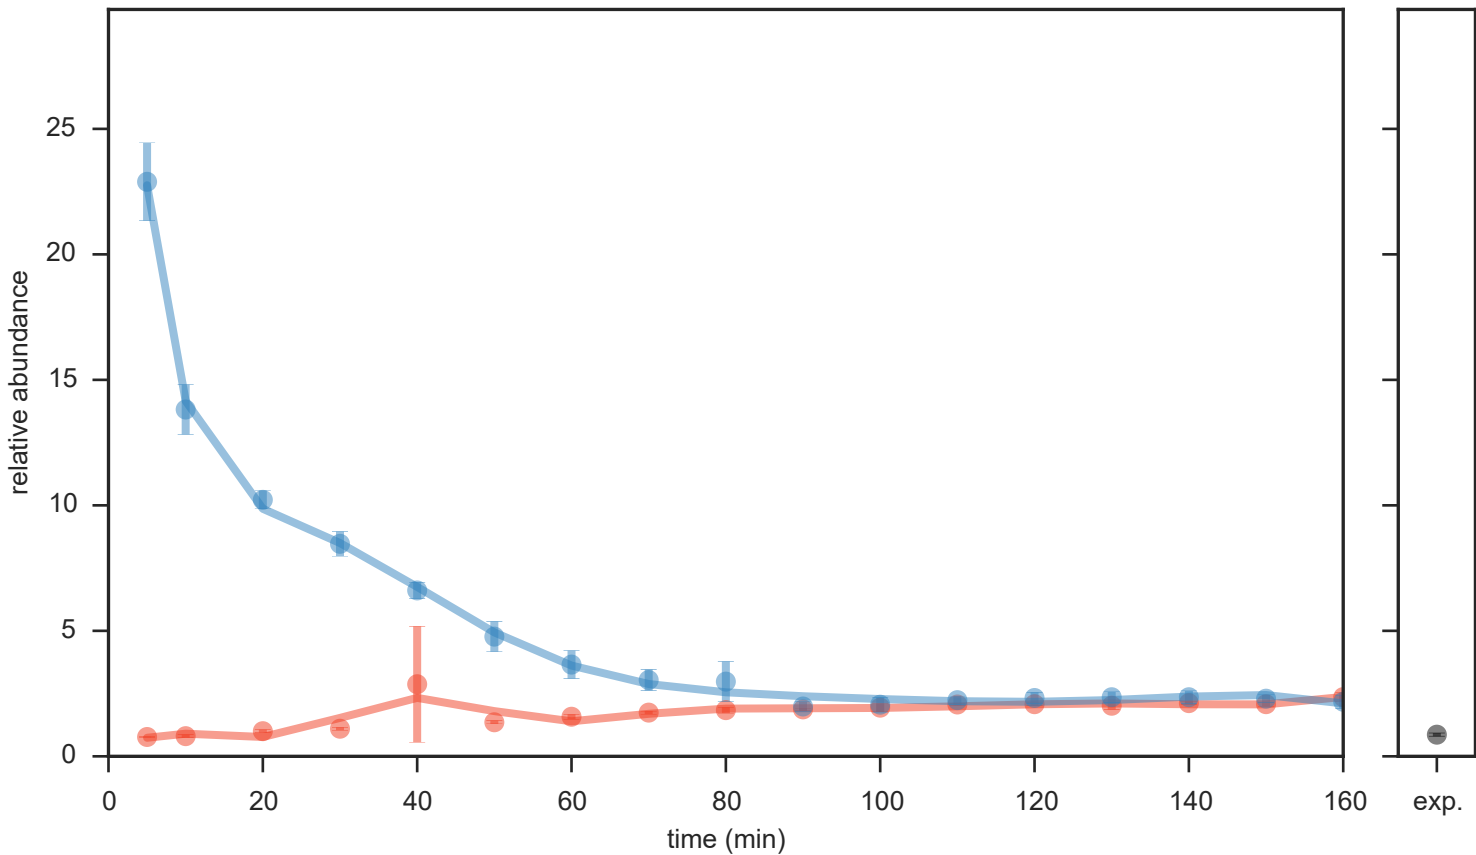

idms\_pid566\_mz426.02

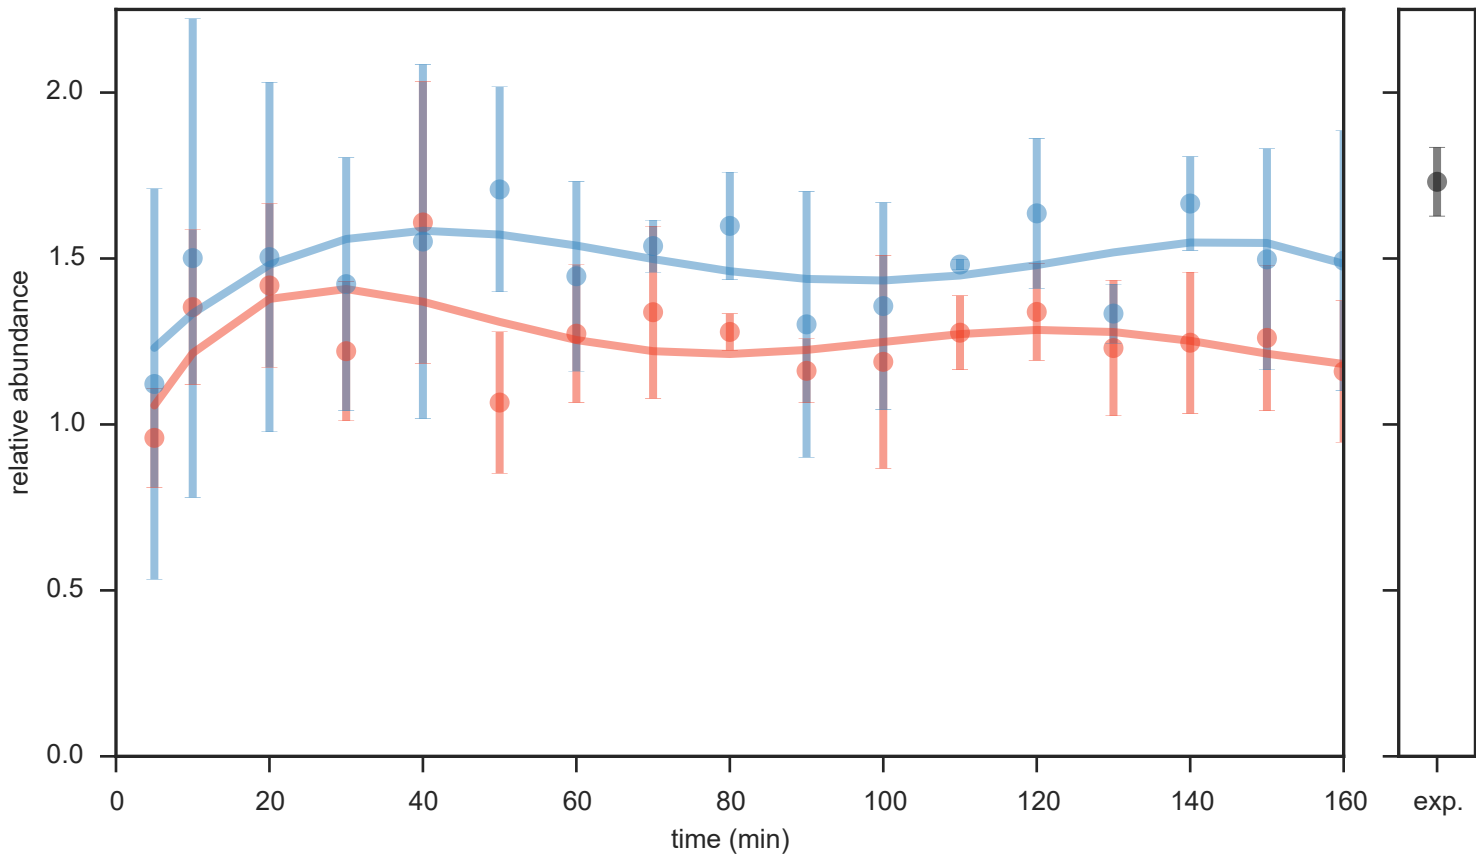

idms\_pid569\_mz370.52

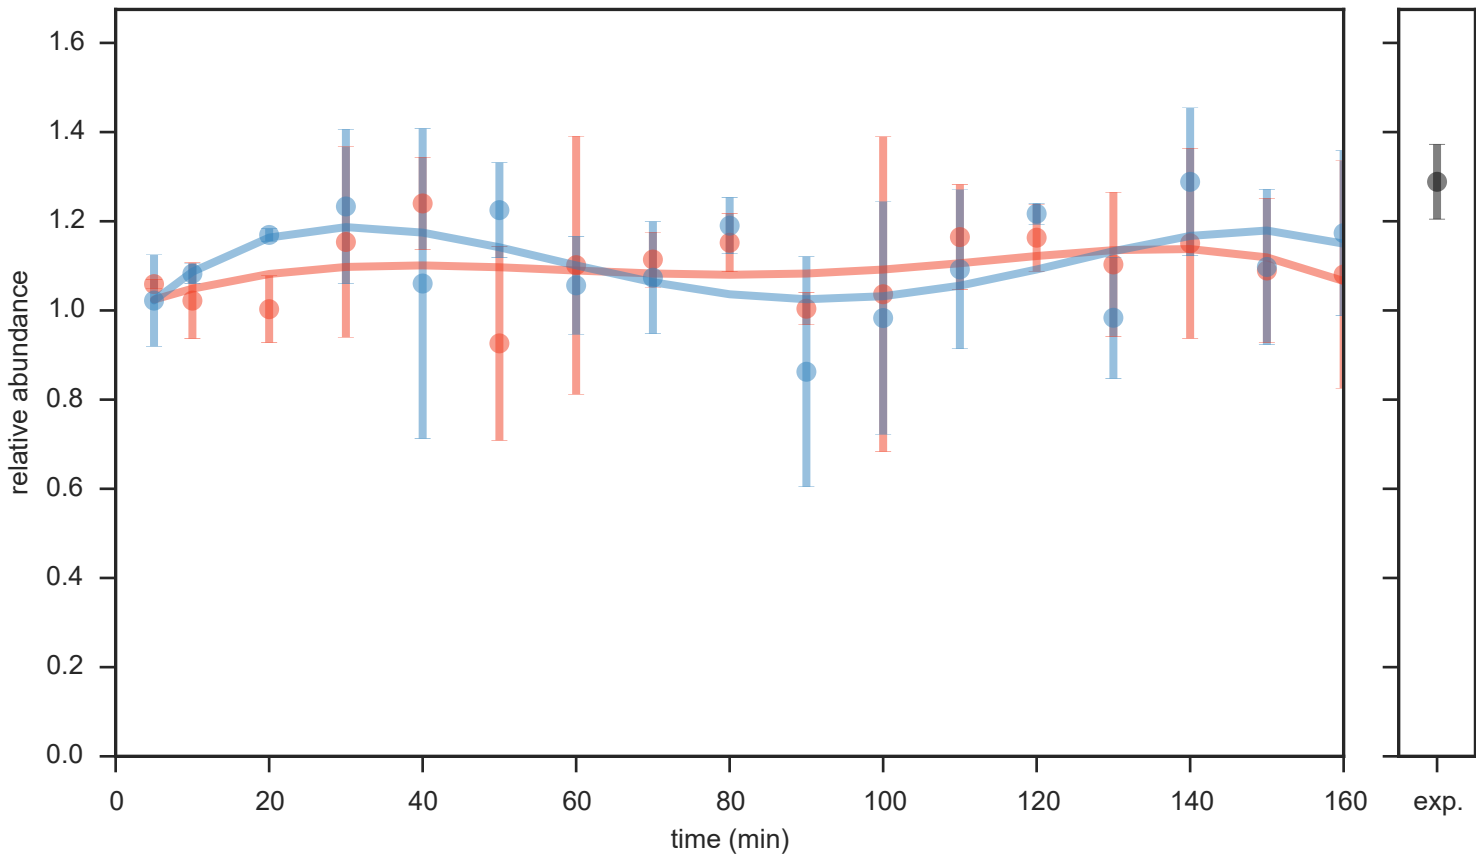

idms\_pid579\_mz143.00

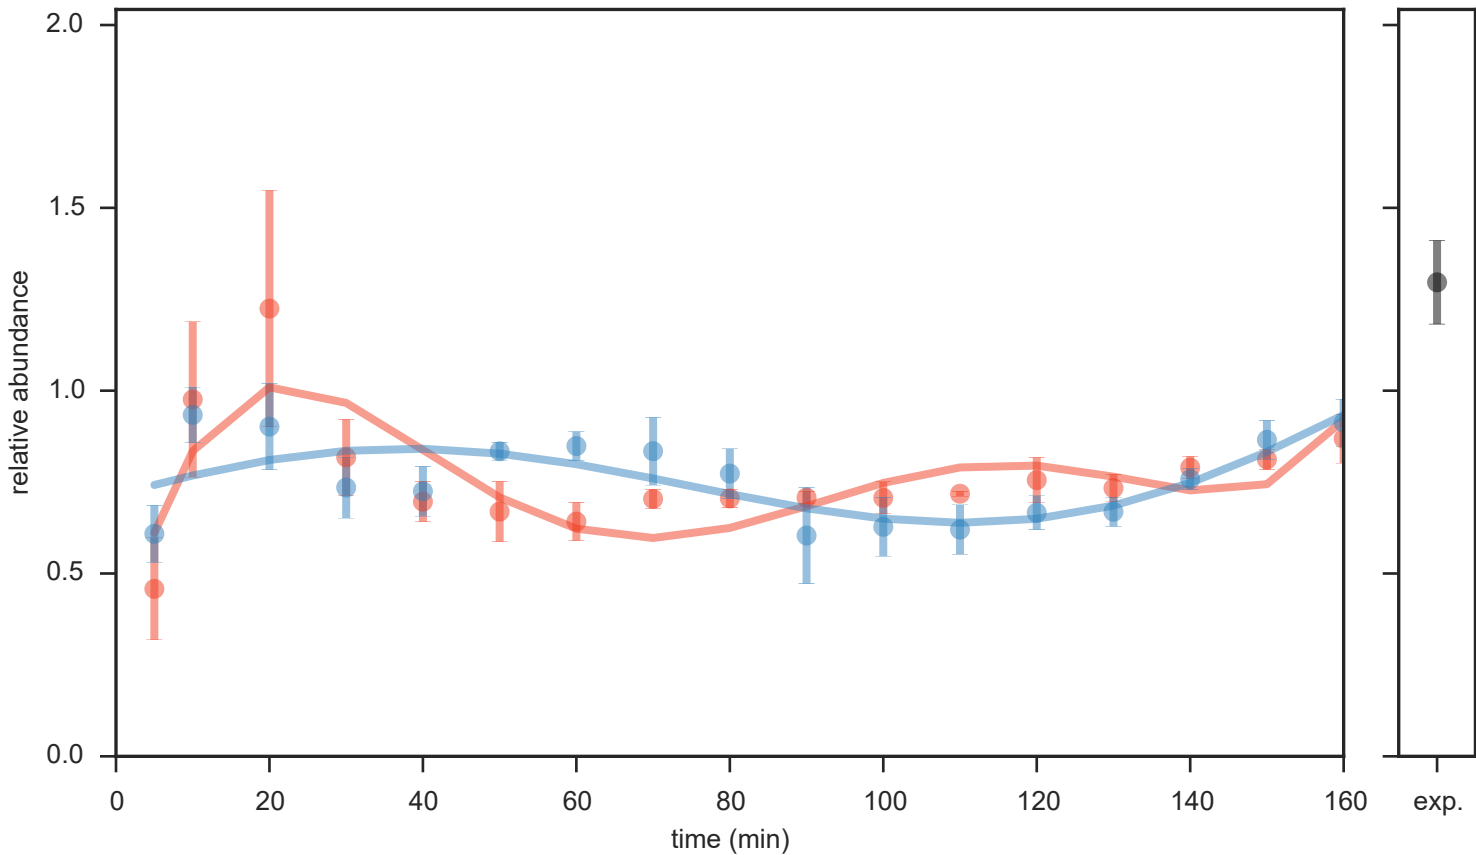

idms\_pid584\_mz198.99

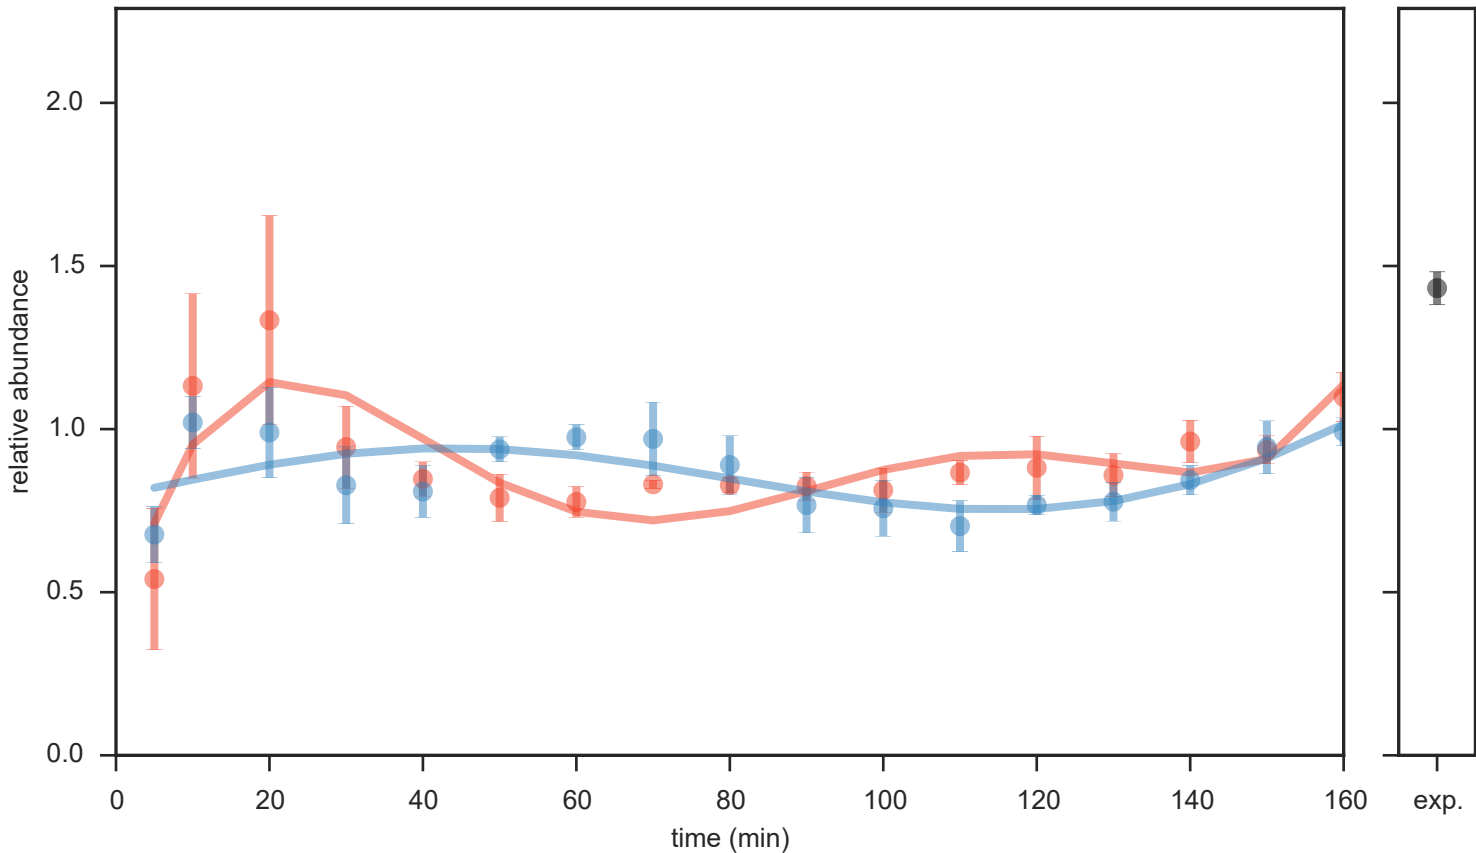

idms\_pid587\_mz300.04

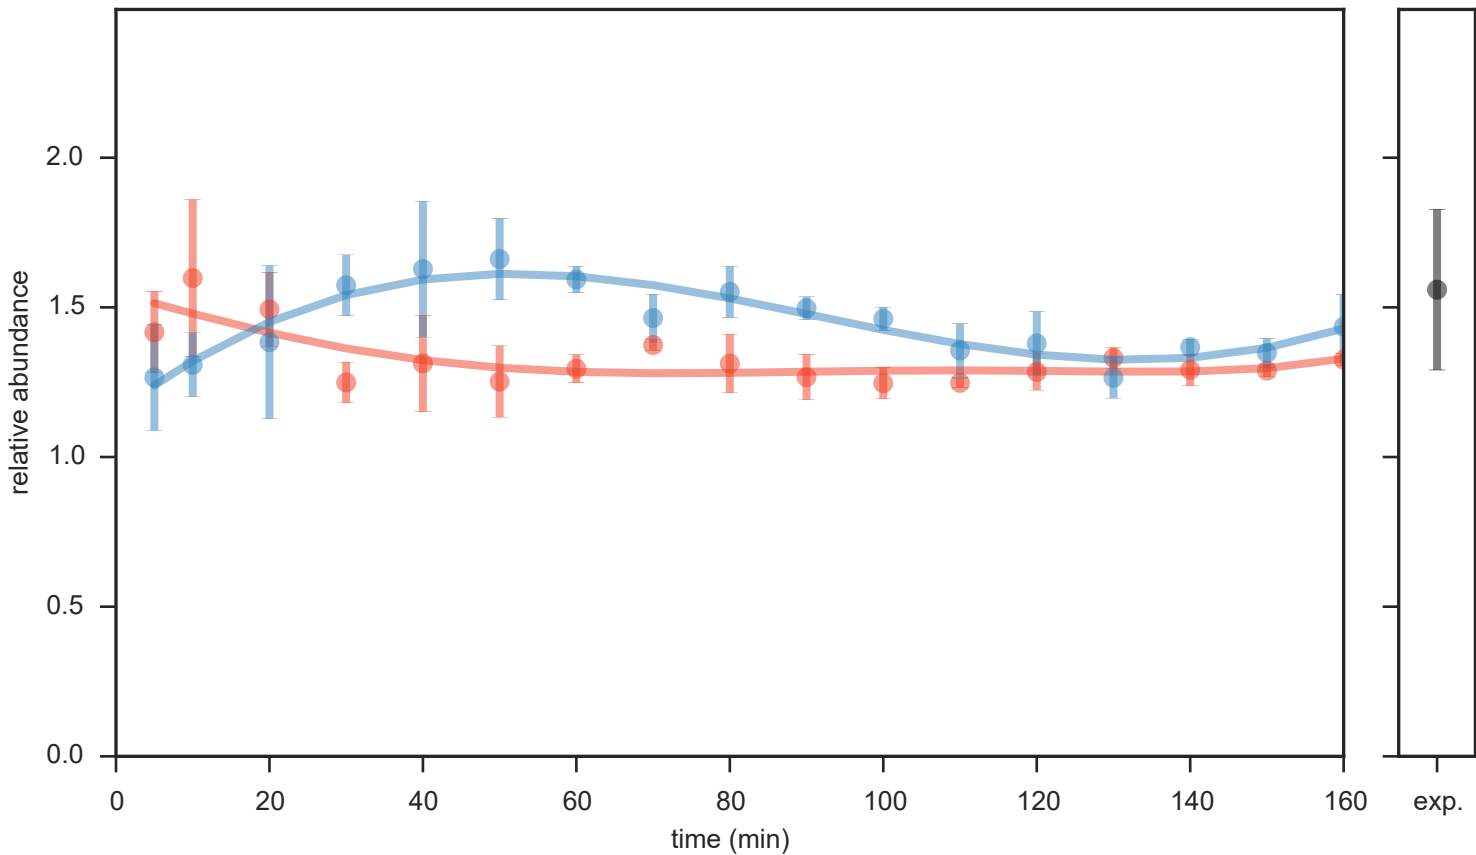

idms\_pid590\_mz269.08

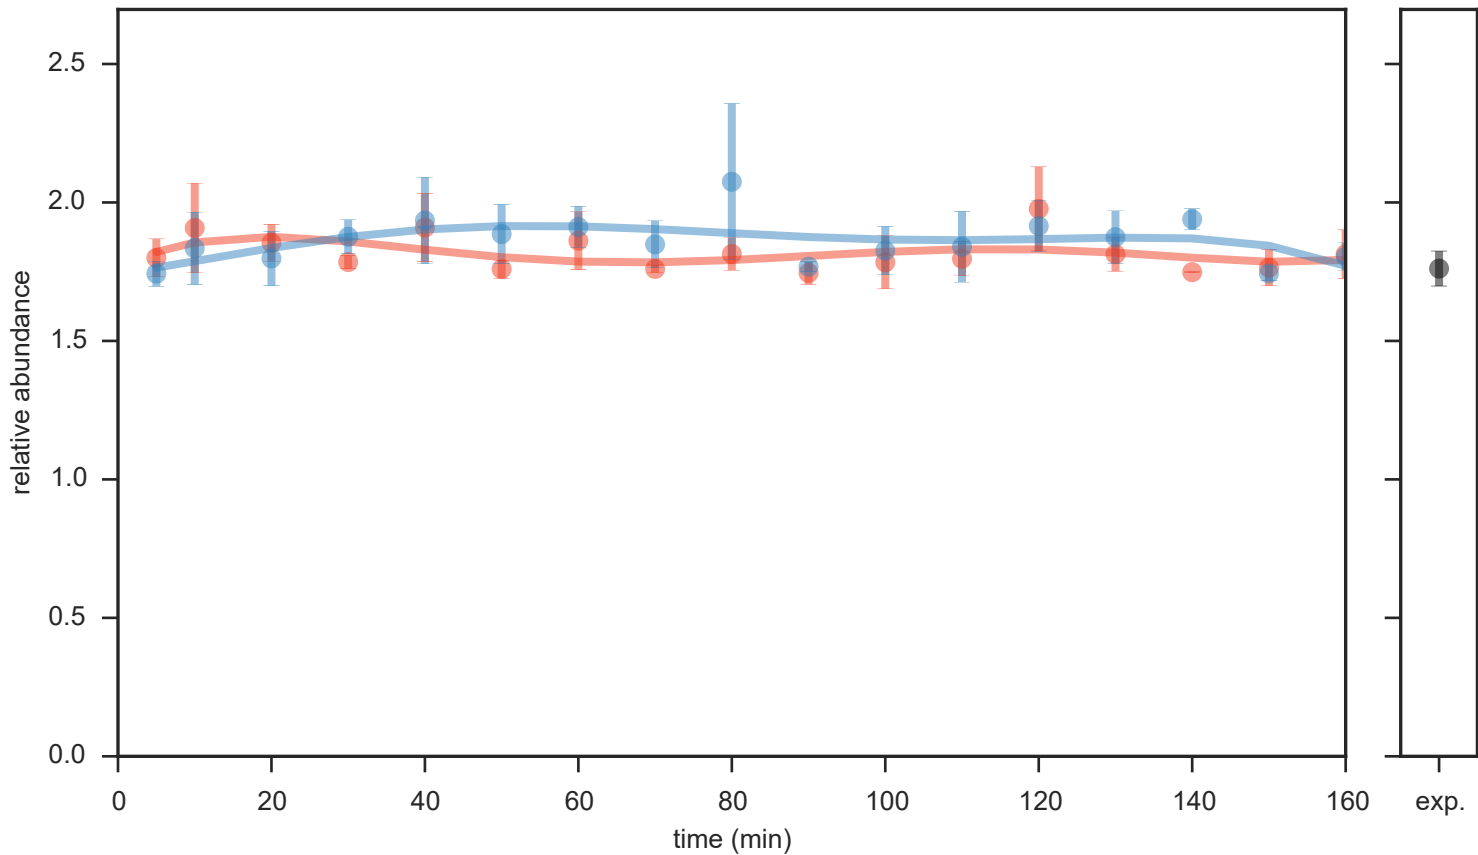



idms\_pid595\_mz135.99

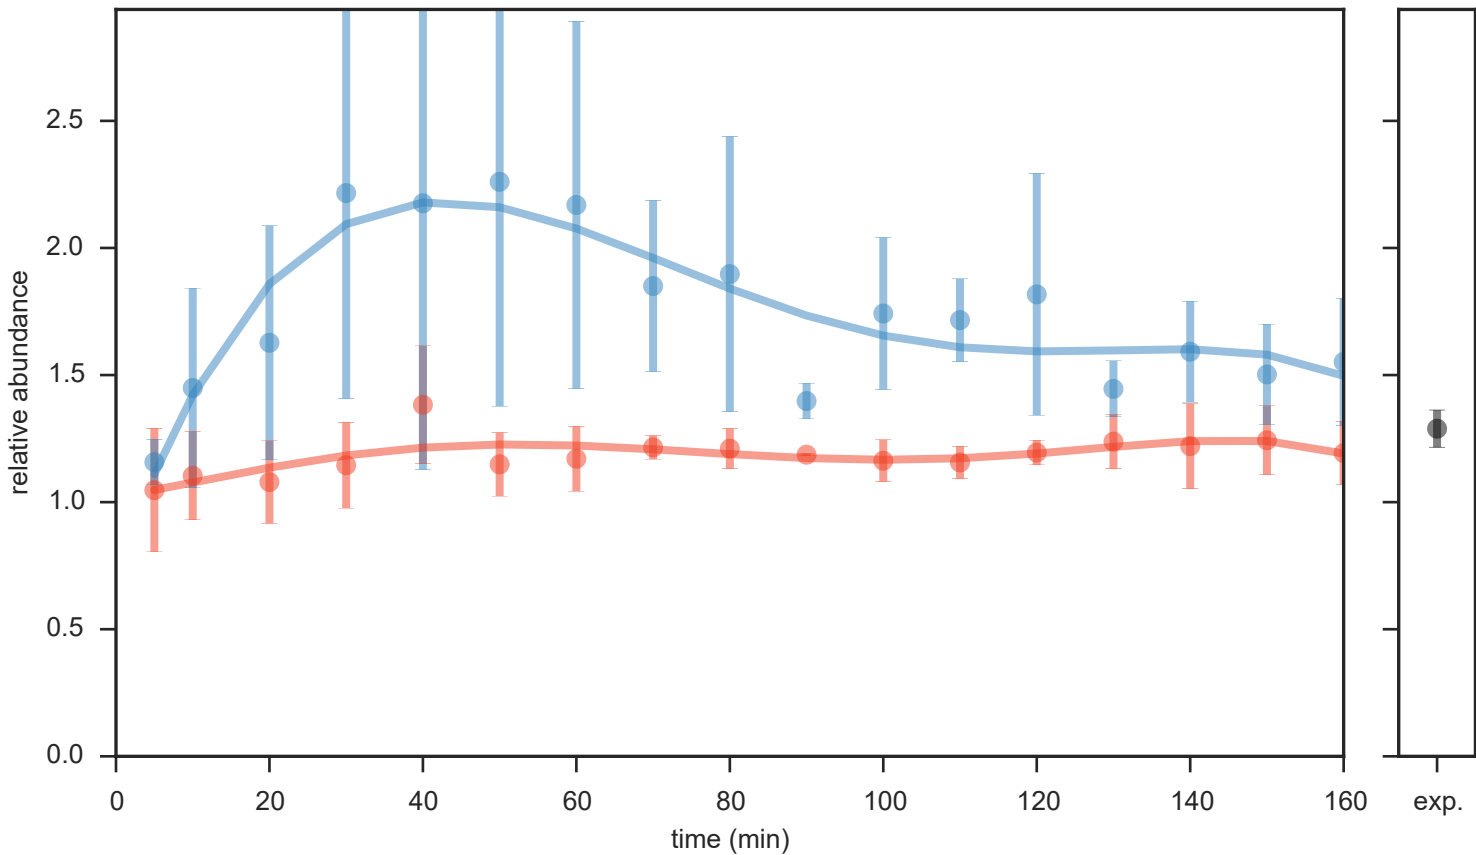

idms\_pid598\_mz286.42

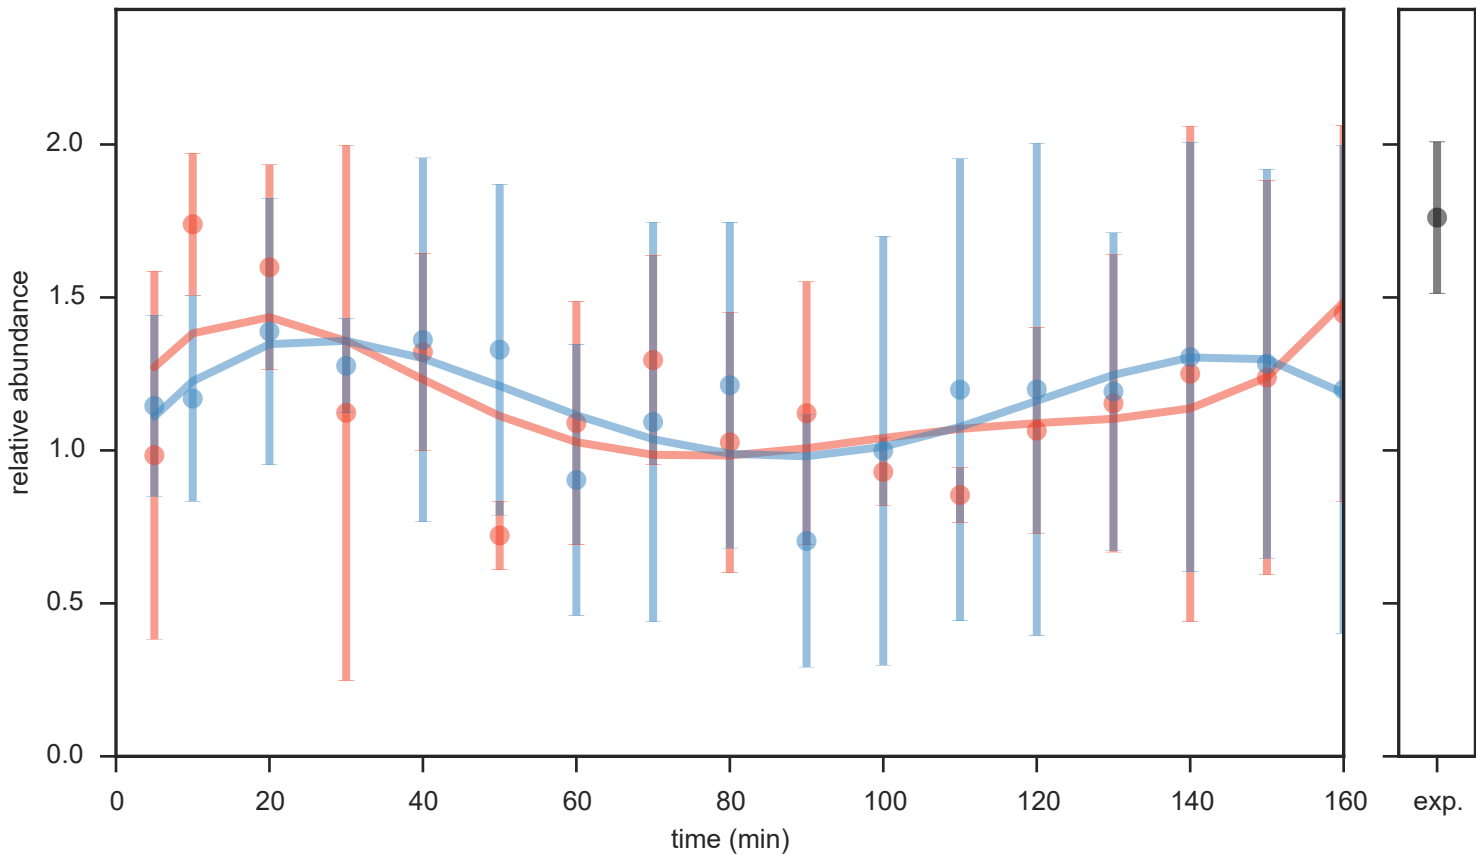

idms\_pid604\_mz168.98

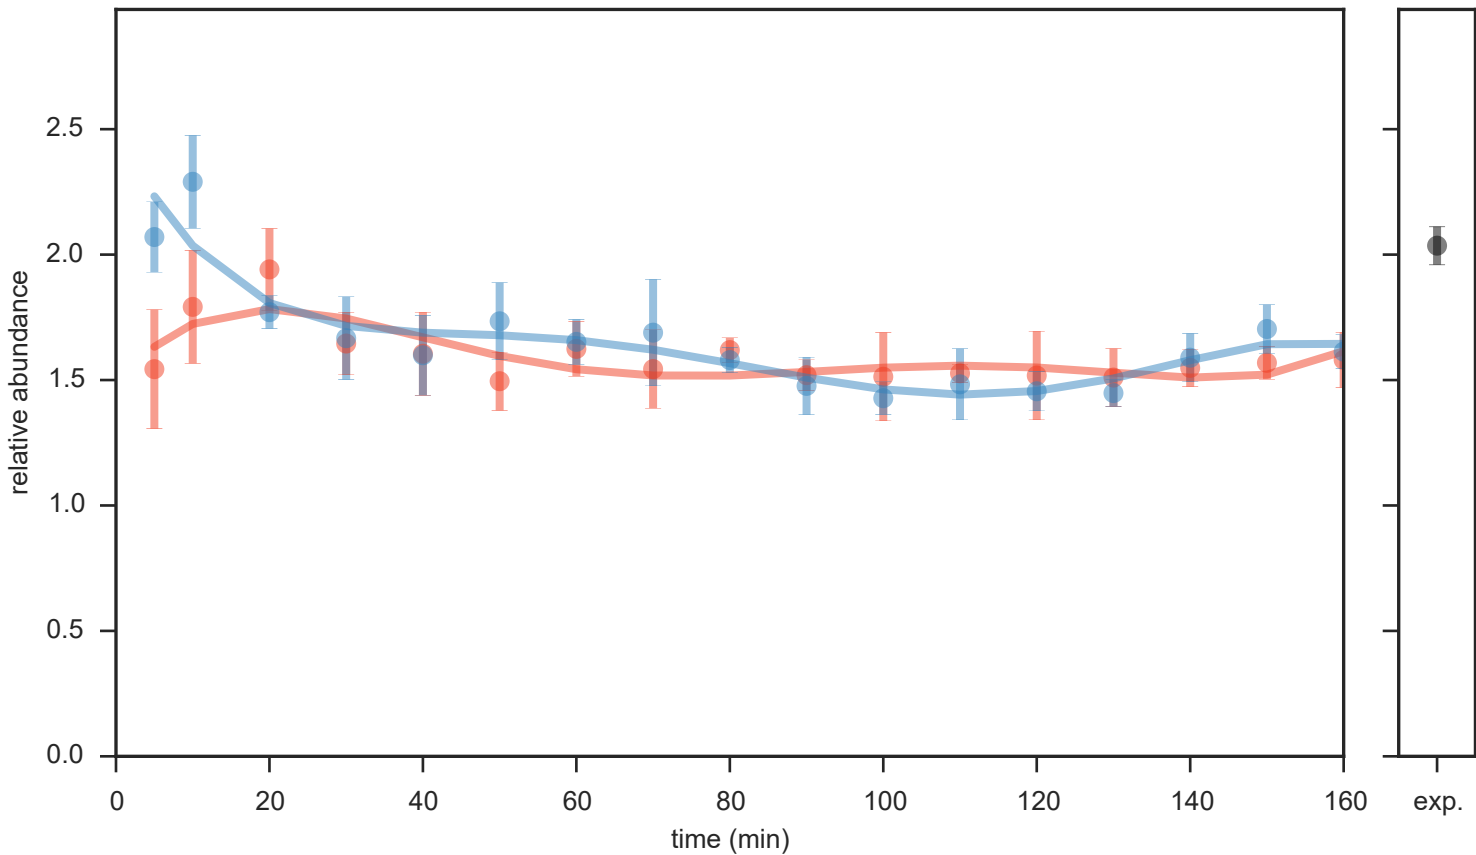

idms\_pid610\_mz210.99

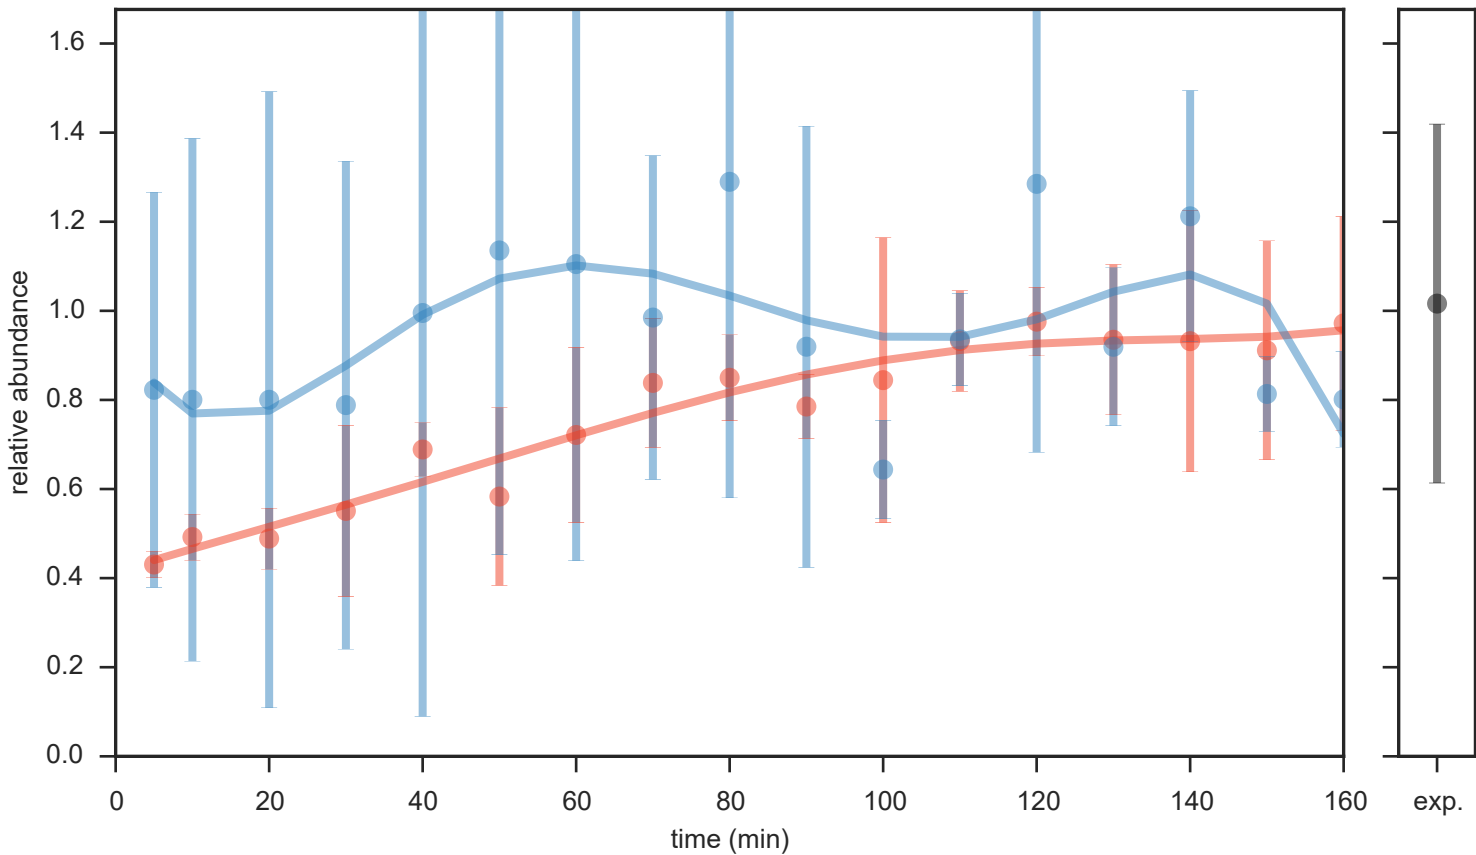

idms\_pid614\_mz184.98

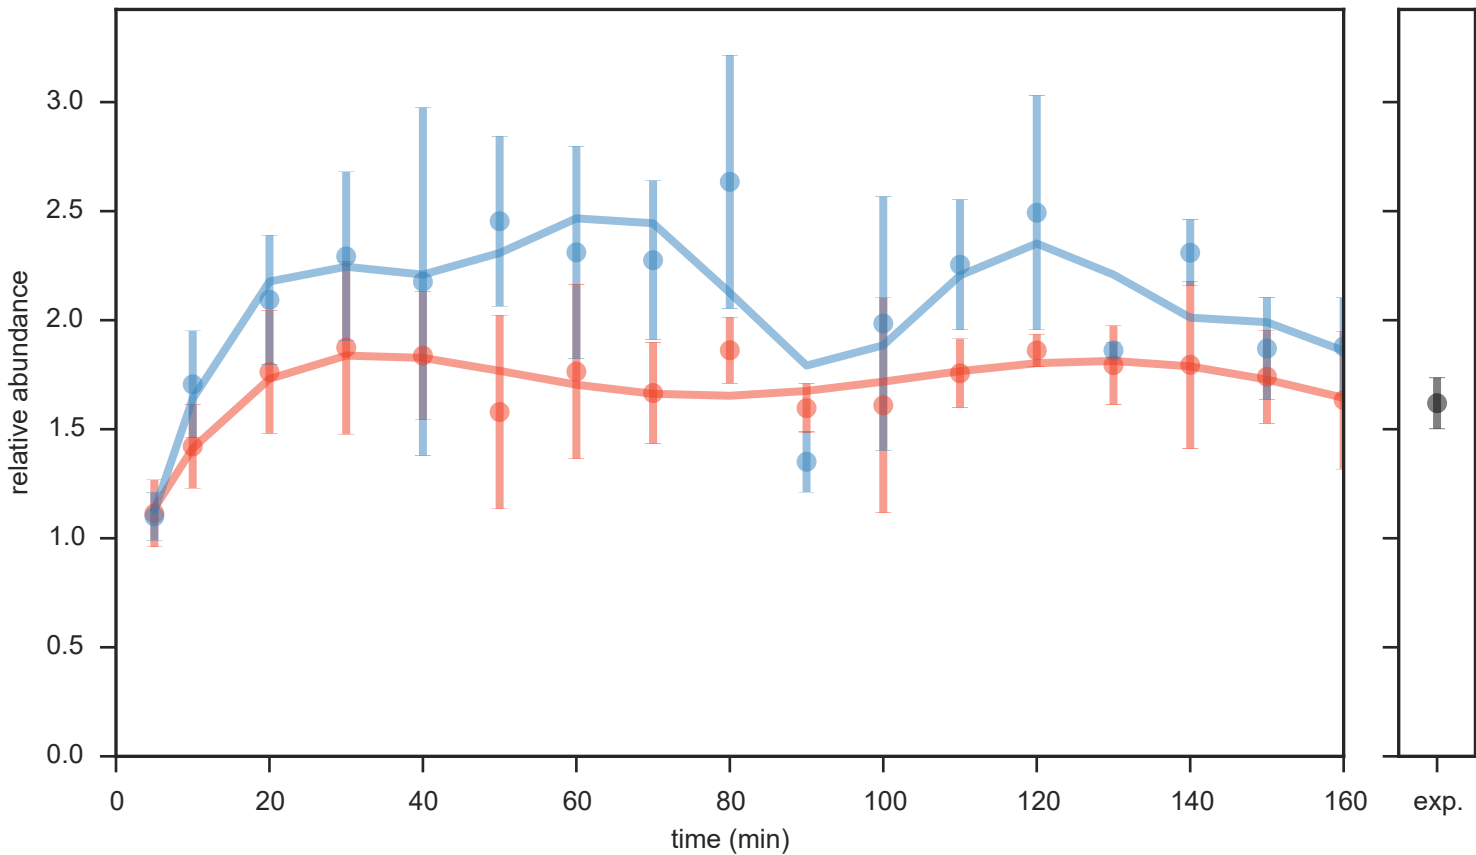

idms\_pid618\_mz331.03

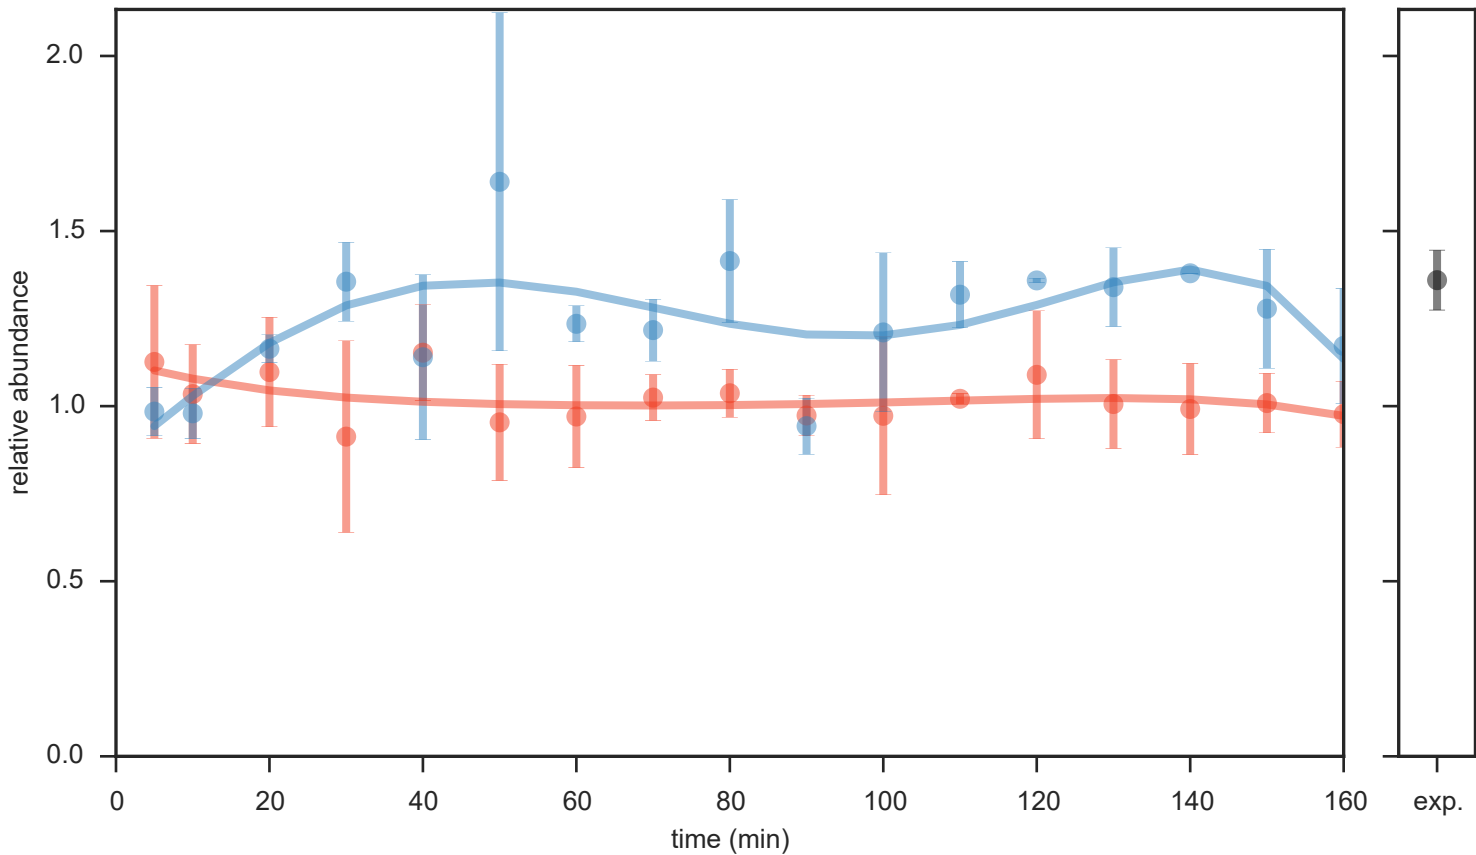

idms\_pid625\_mz208.06

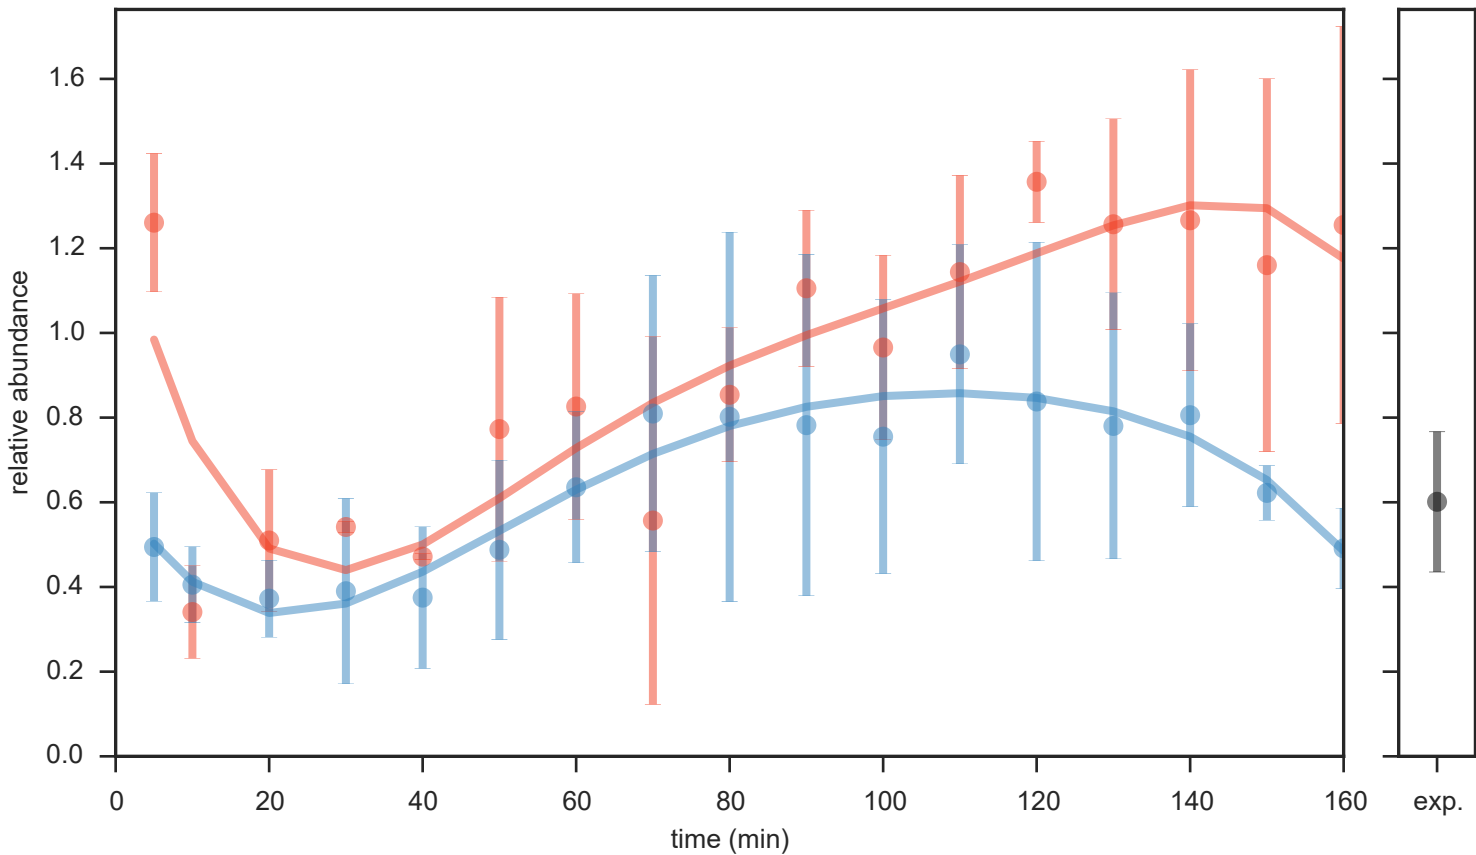

idms\_pid628\_mz501.95

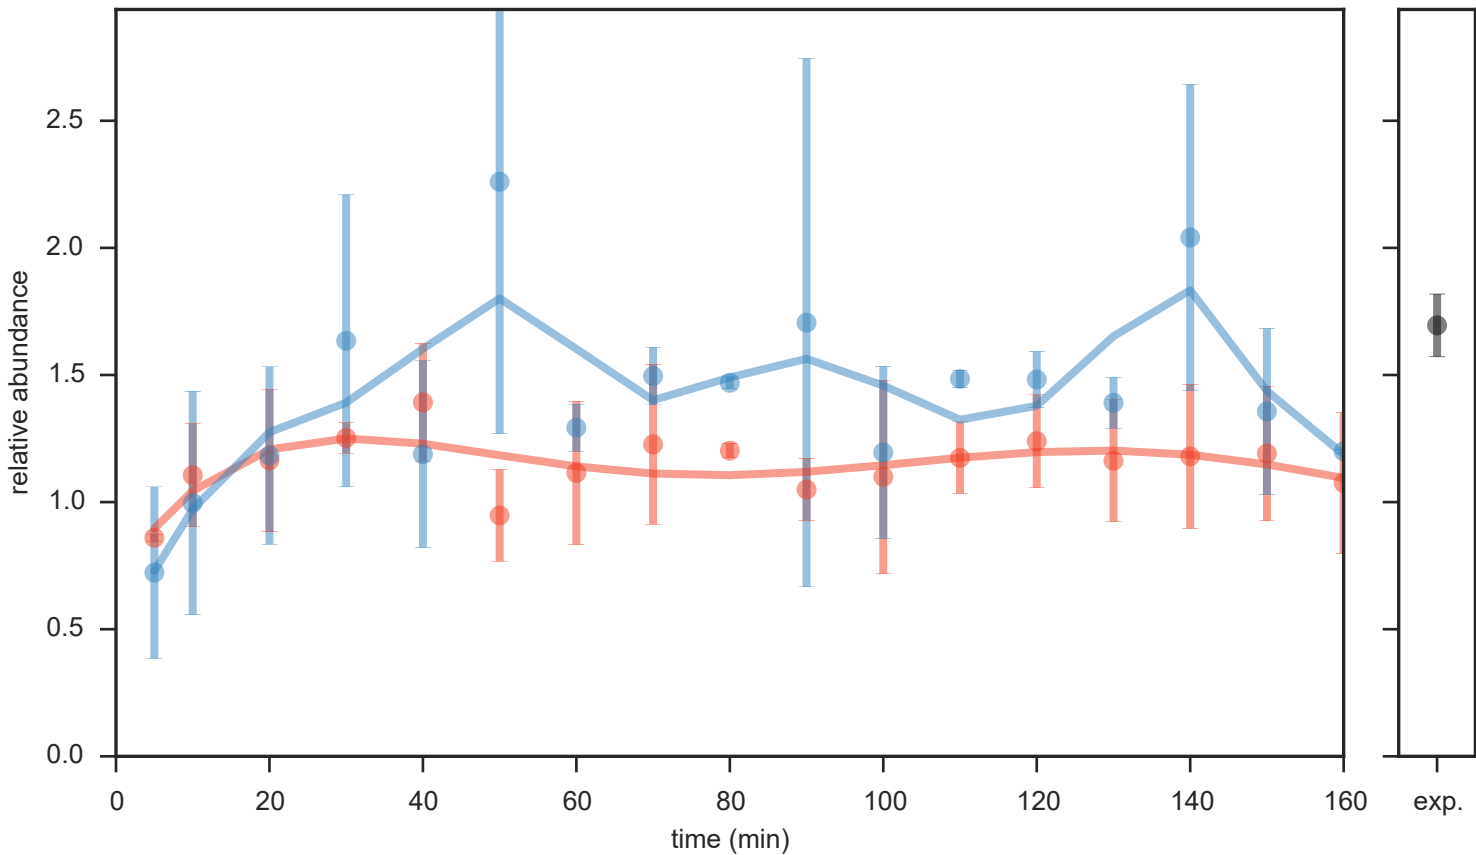



idms\_pid634\_mz192.51

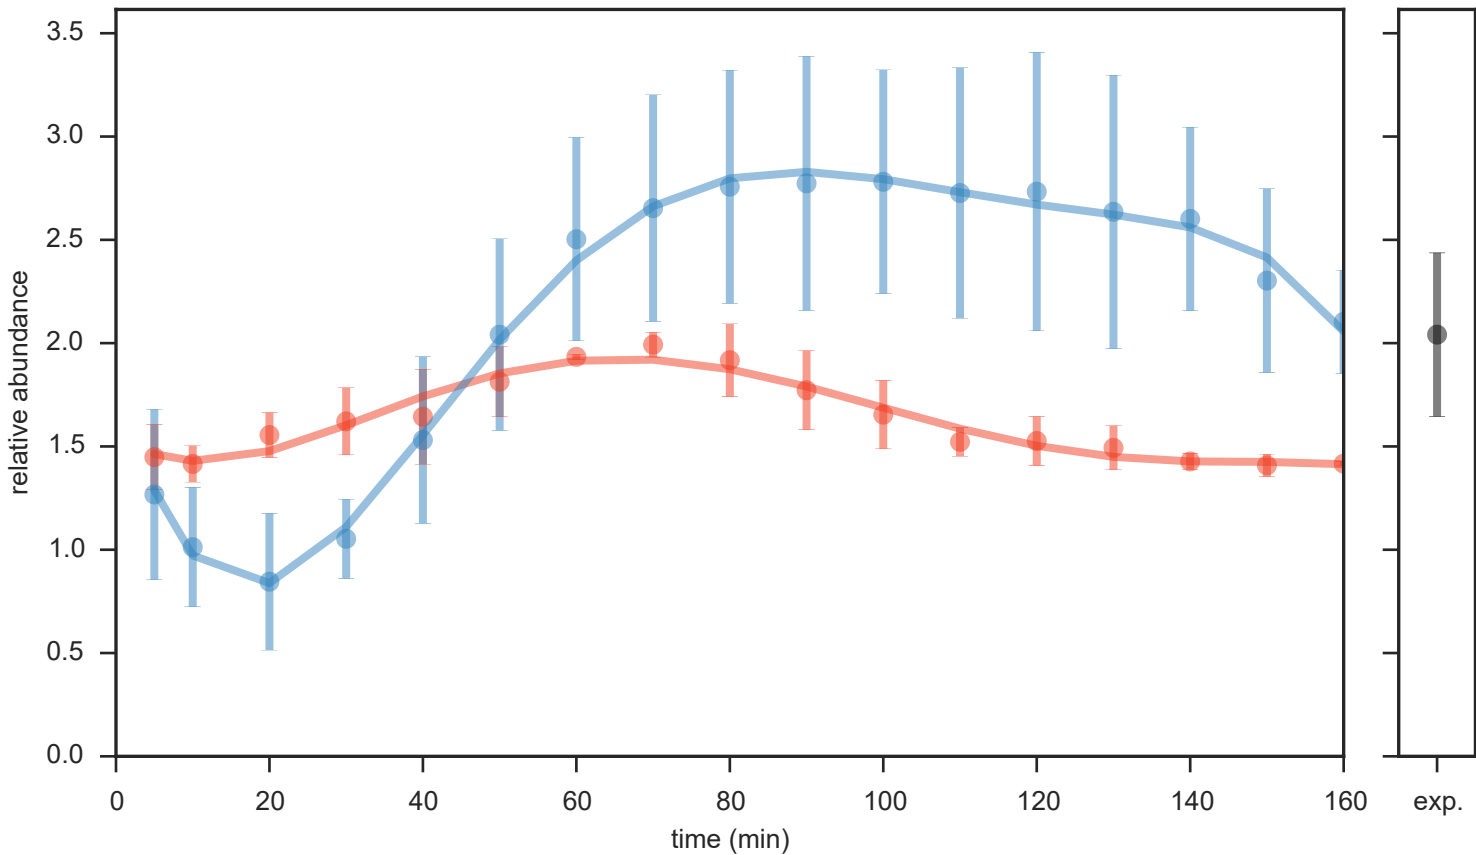

idms\_pid639\_mz549.06

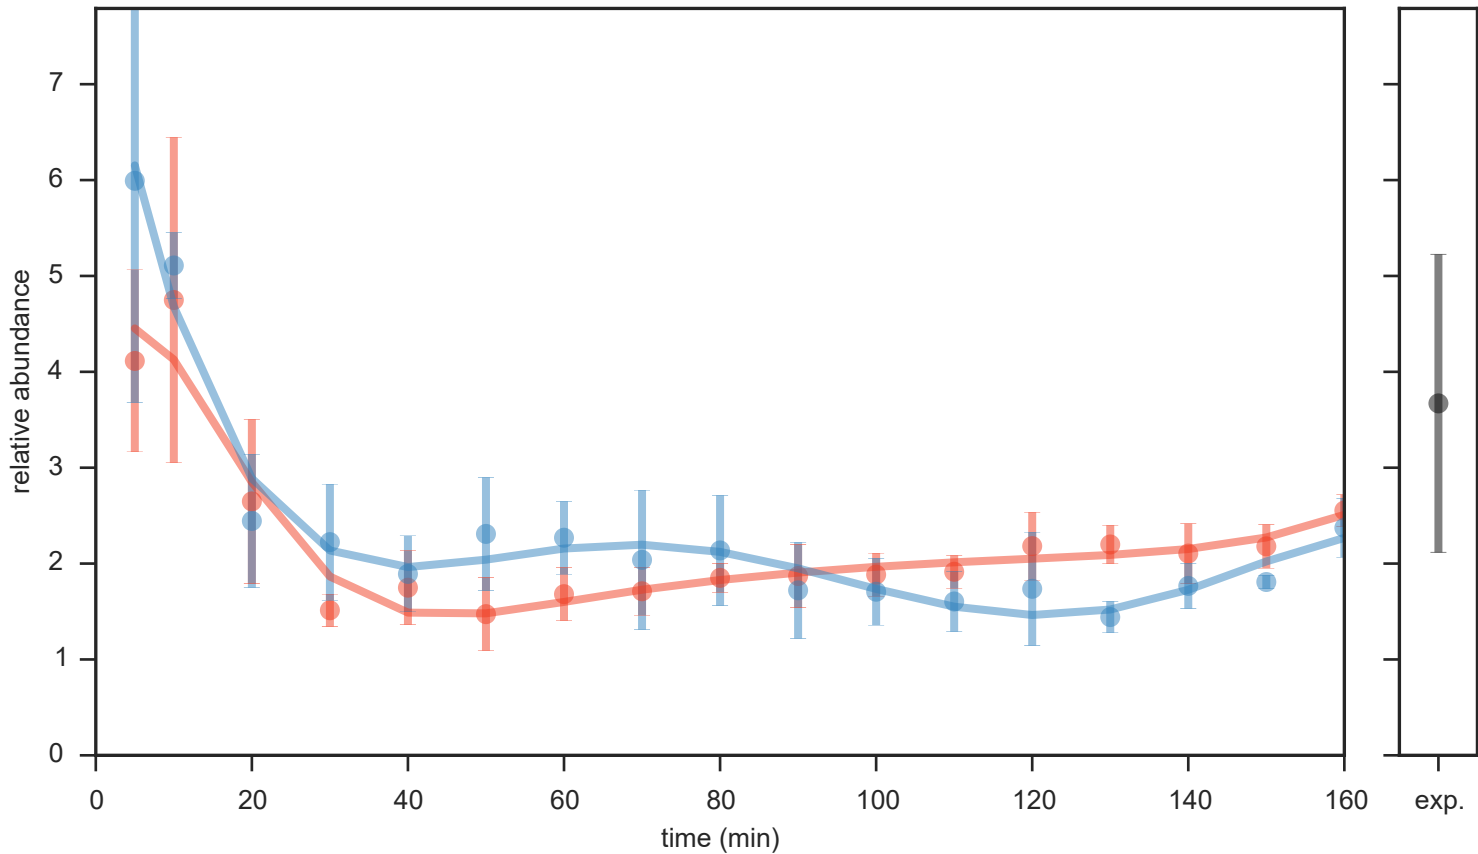

idms\_pid657\_mz410.56

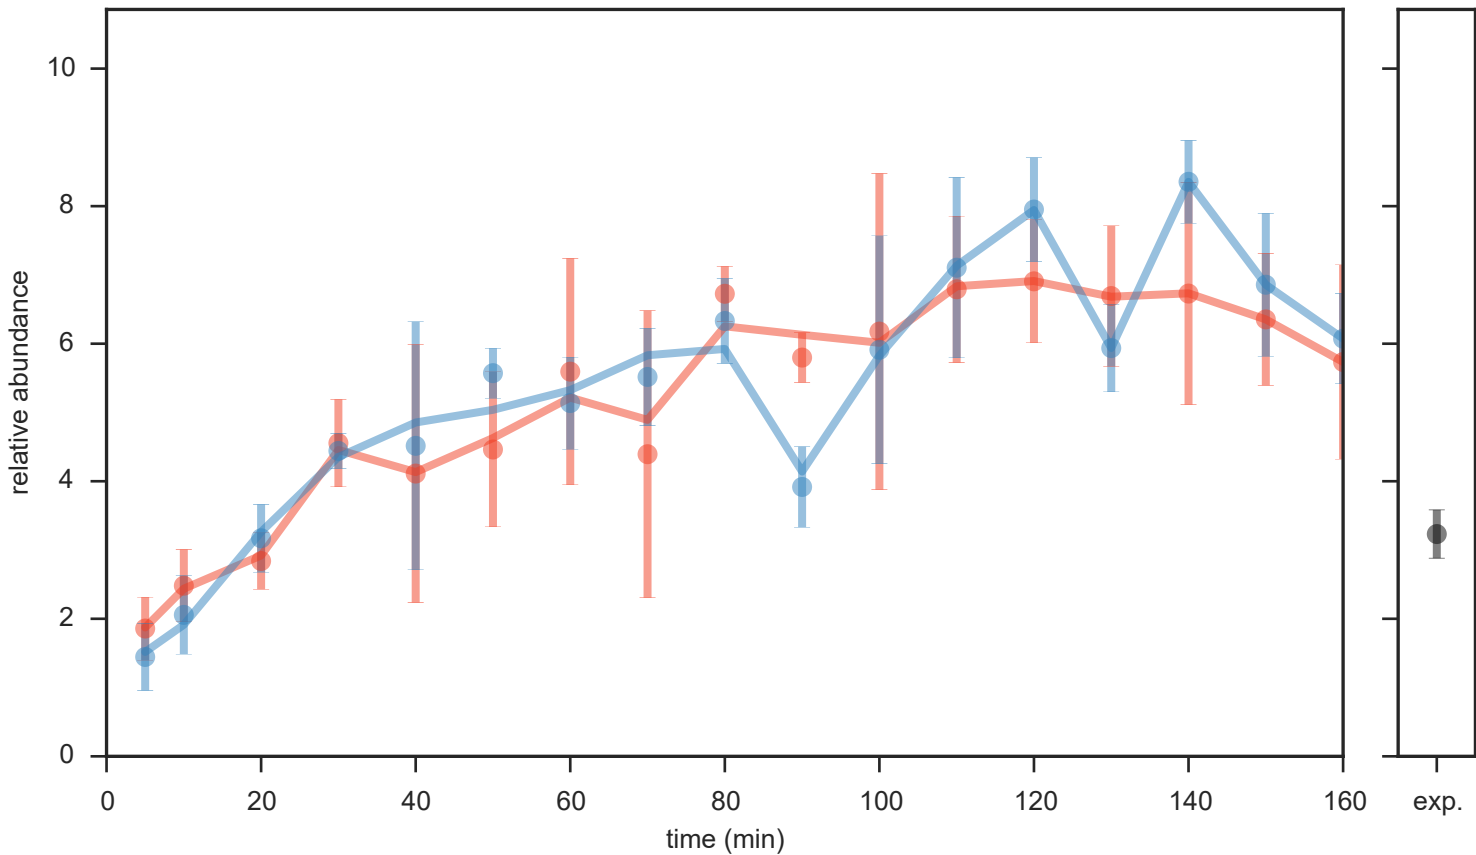

idms\_pid667\_mz257.03

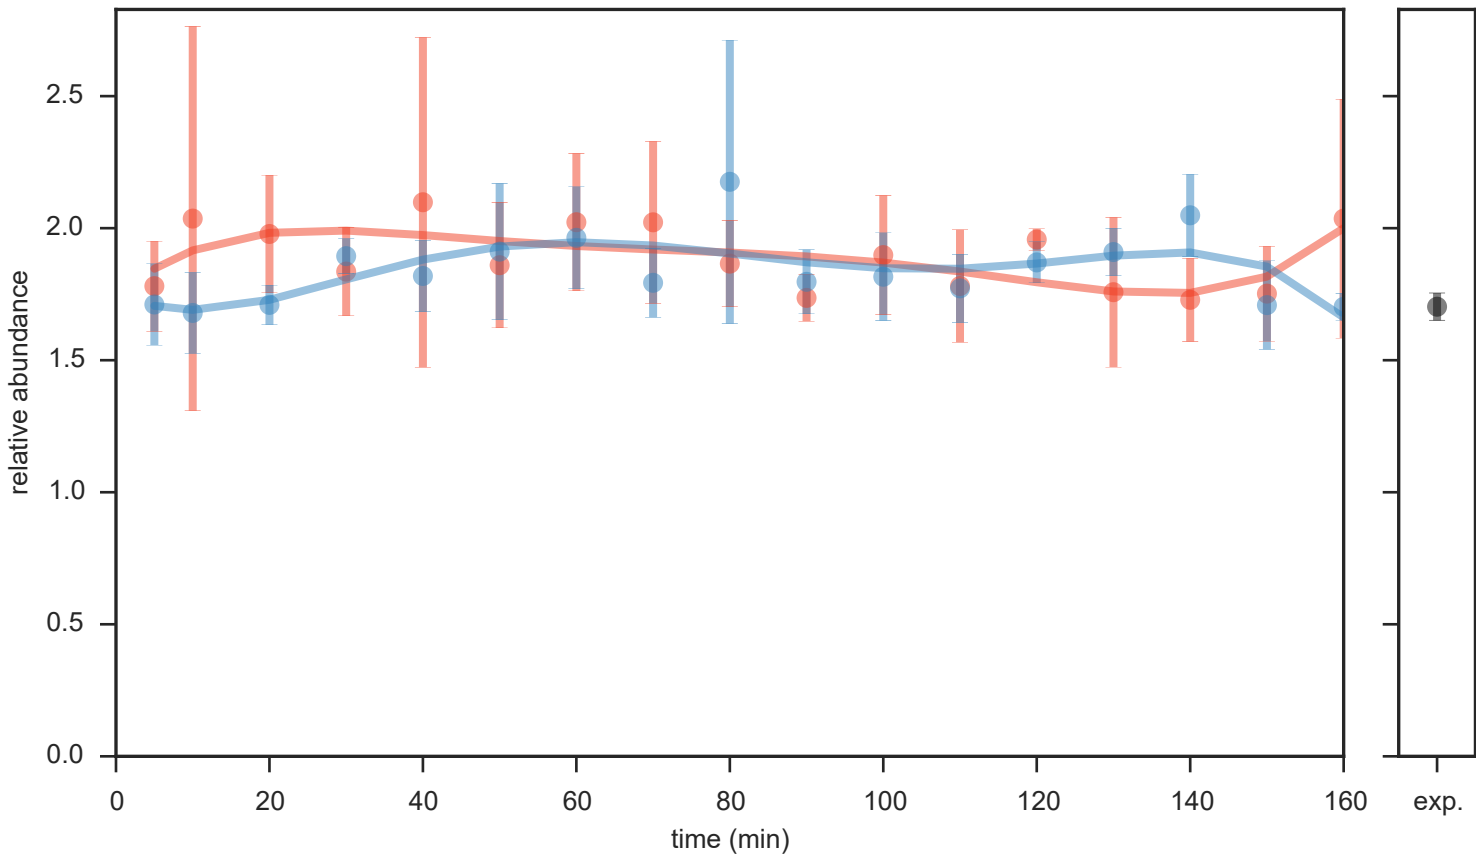

idms\_pid671\_mz346.05

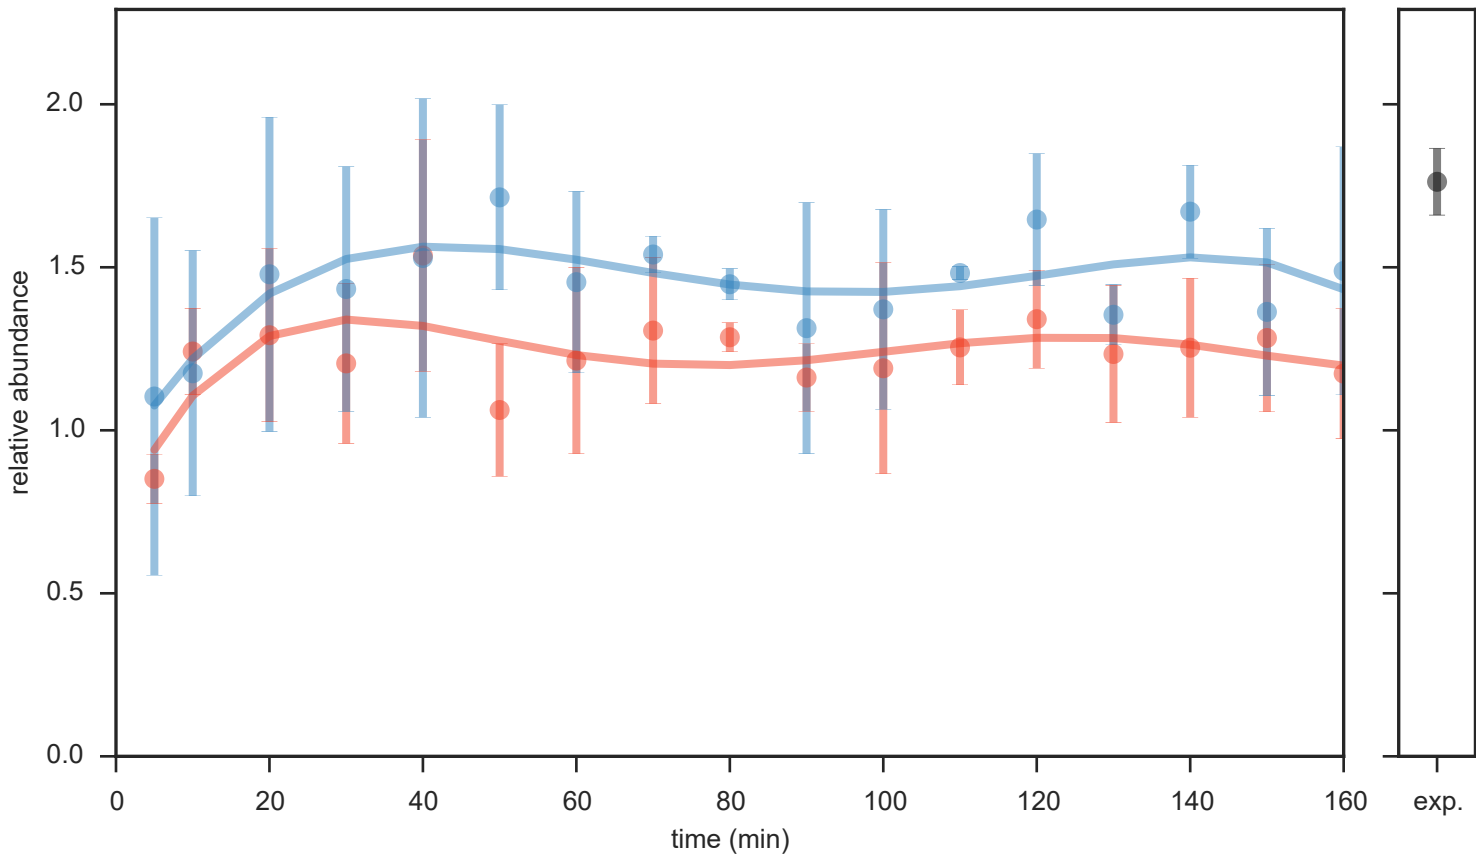

idms\_pid688\_mz378.98

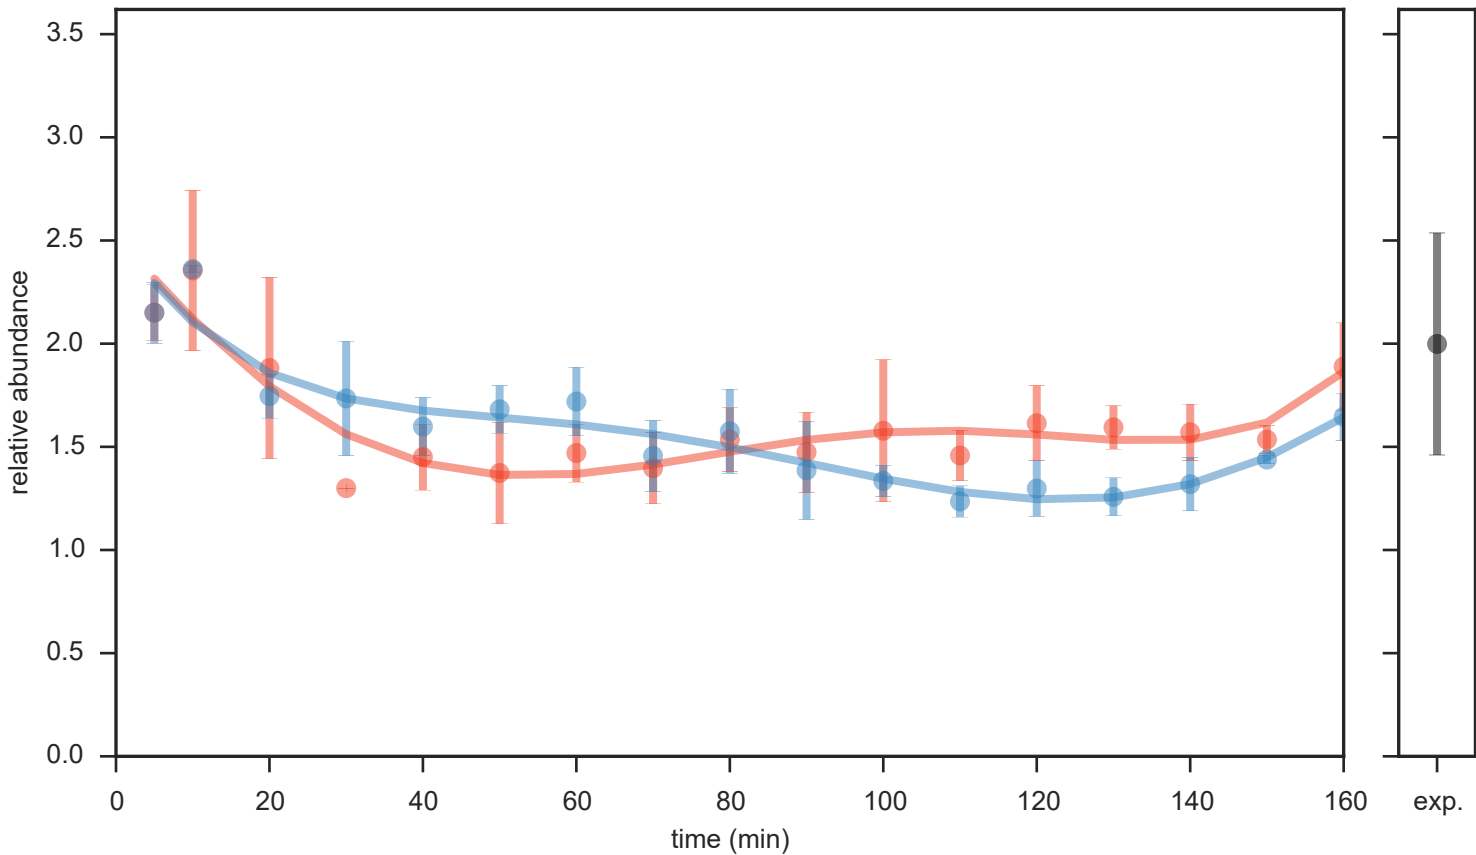

idms\_pid701\_mz402.00

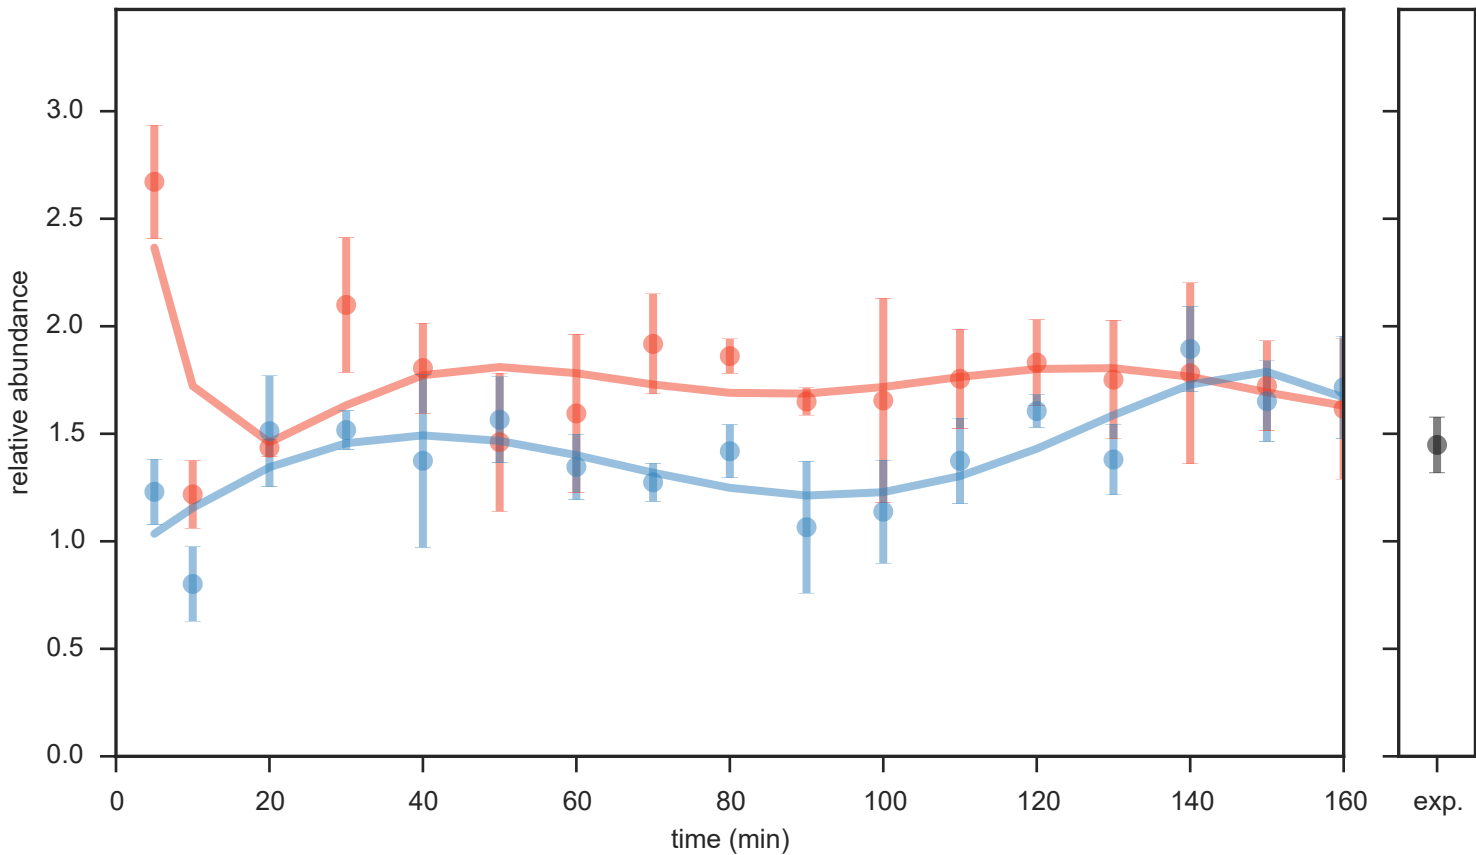

idms\_pid706\_mz280.42

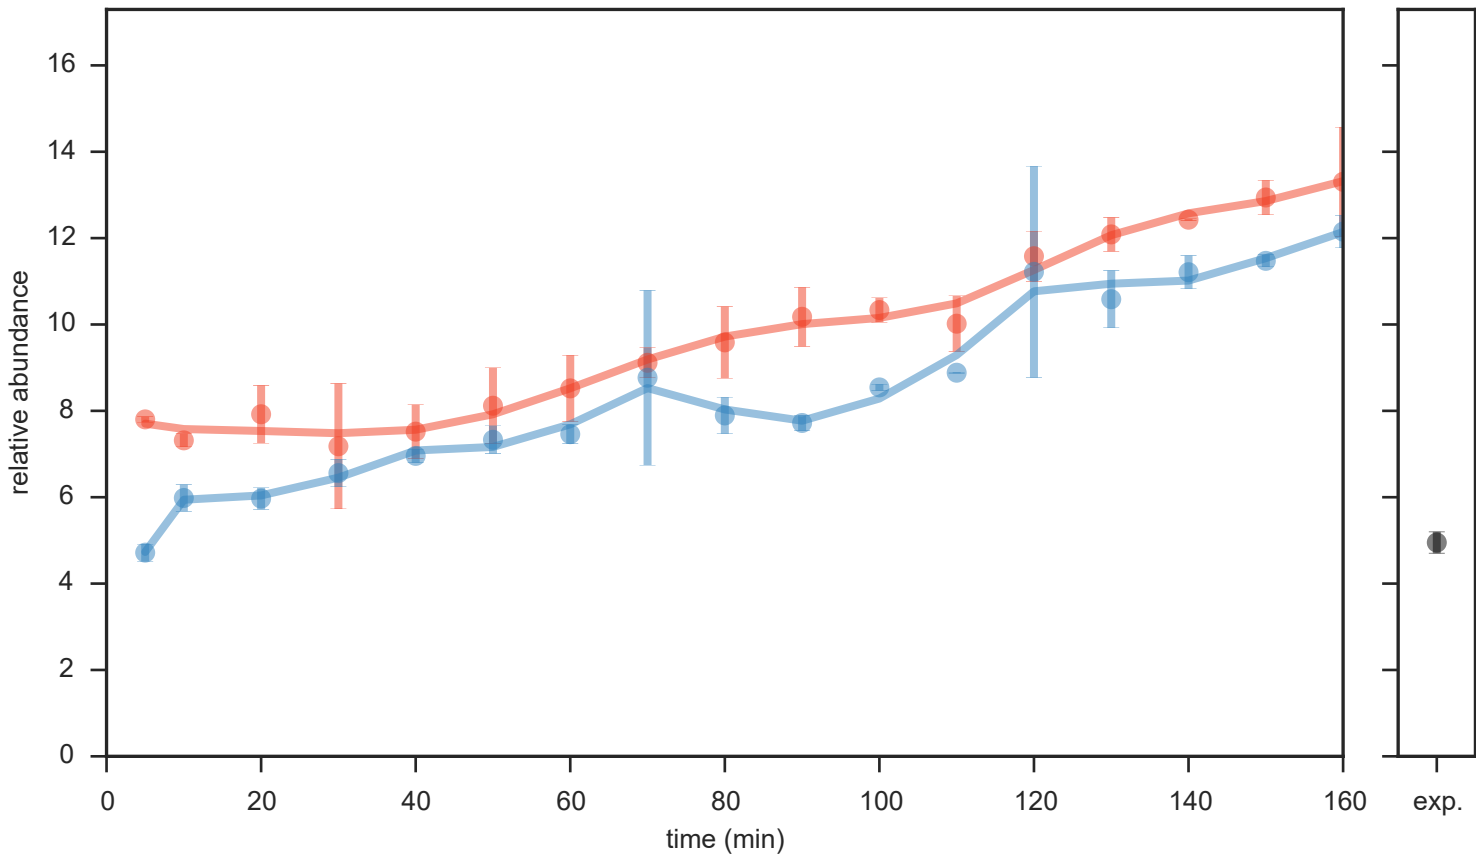



idms\_pid707\_mz278.86

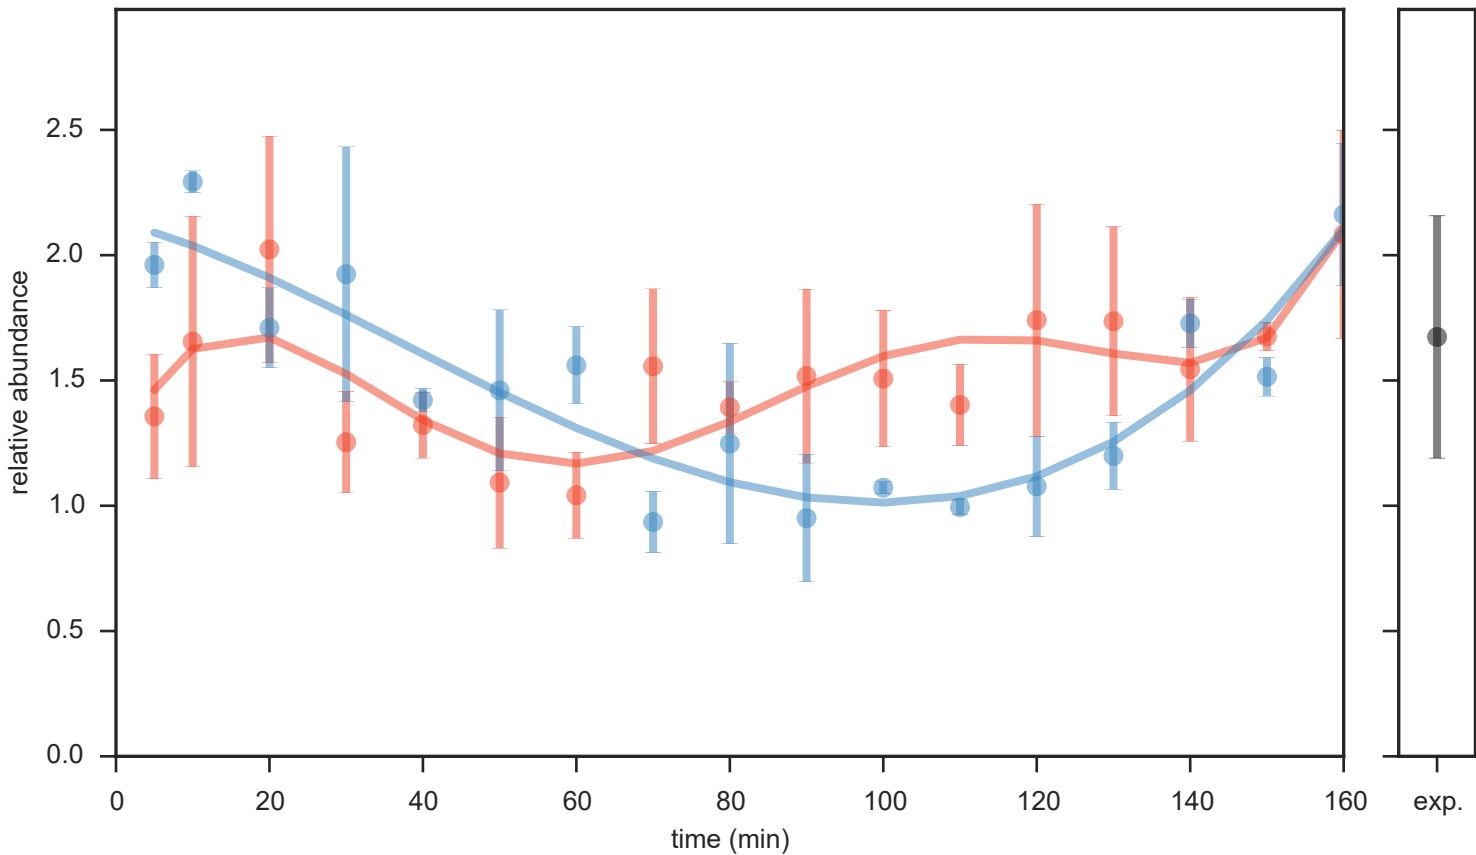

idms\_pid708\_mz249.03

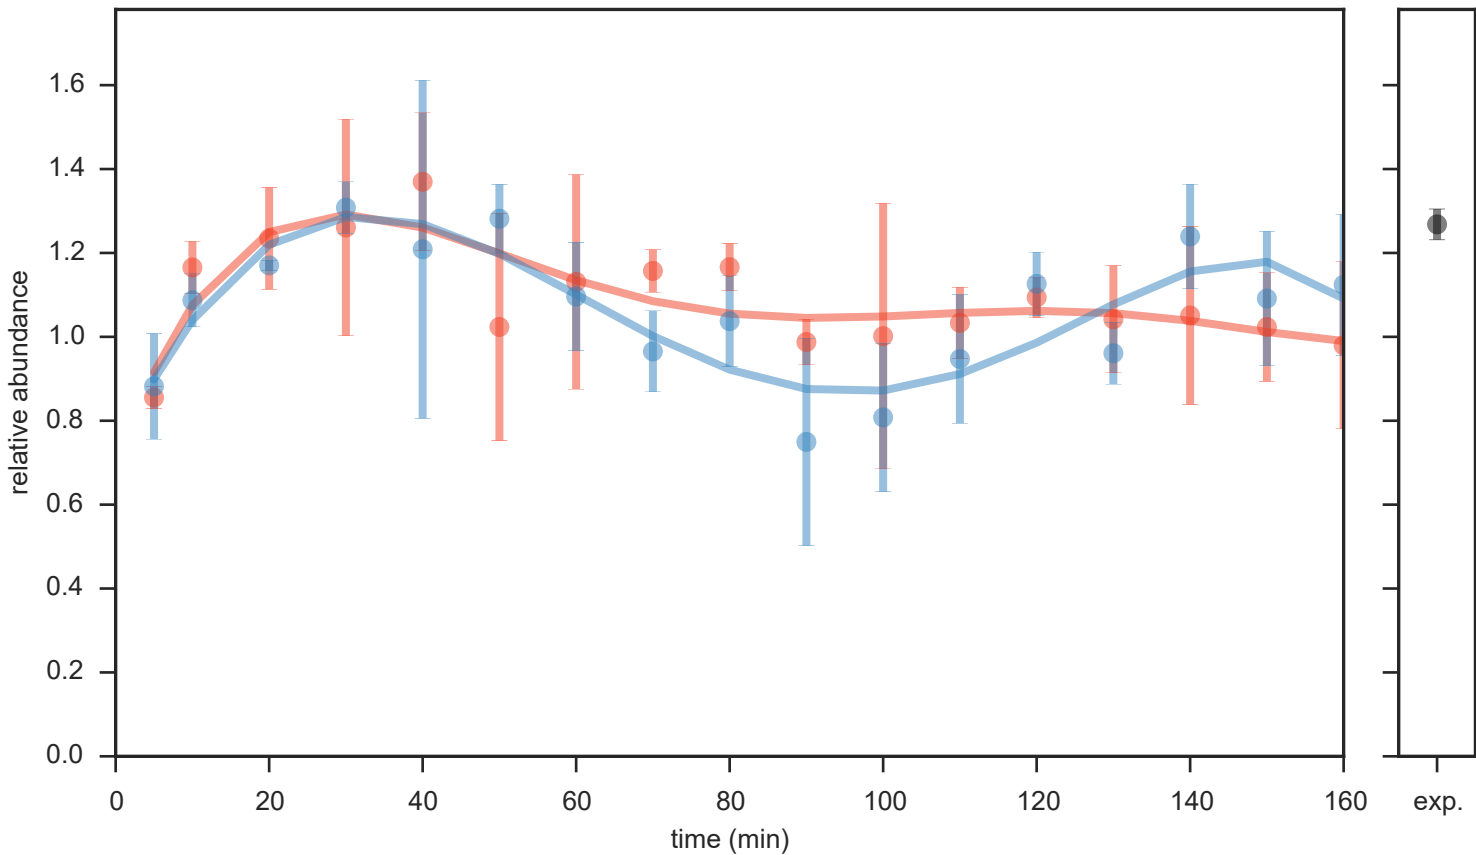

idms\_pid717\_mz115.00

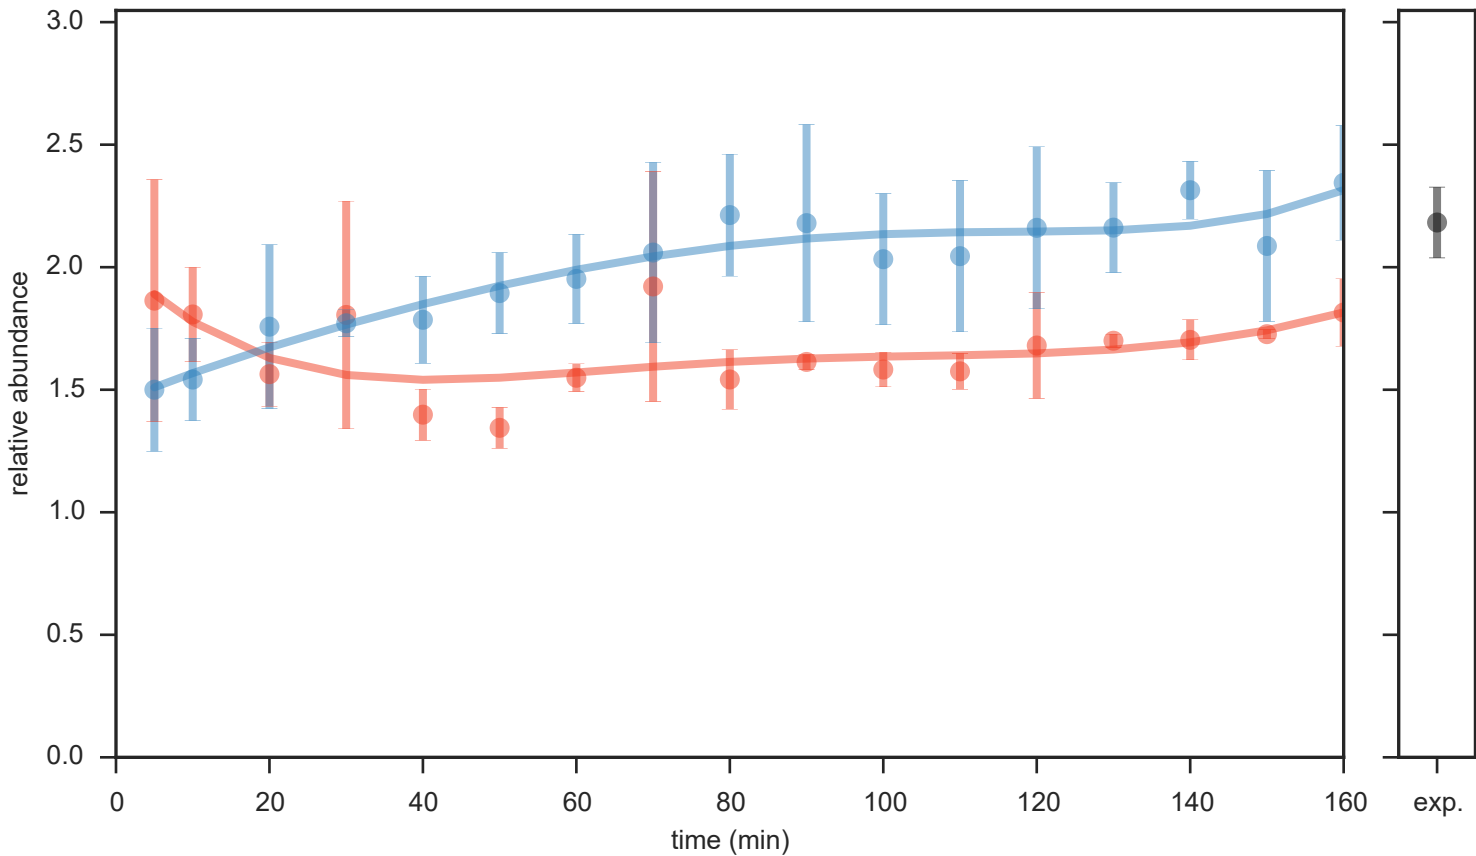

idms\_pid725\_mz200.99

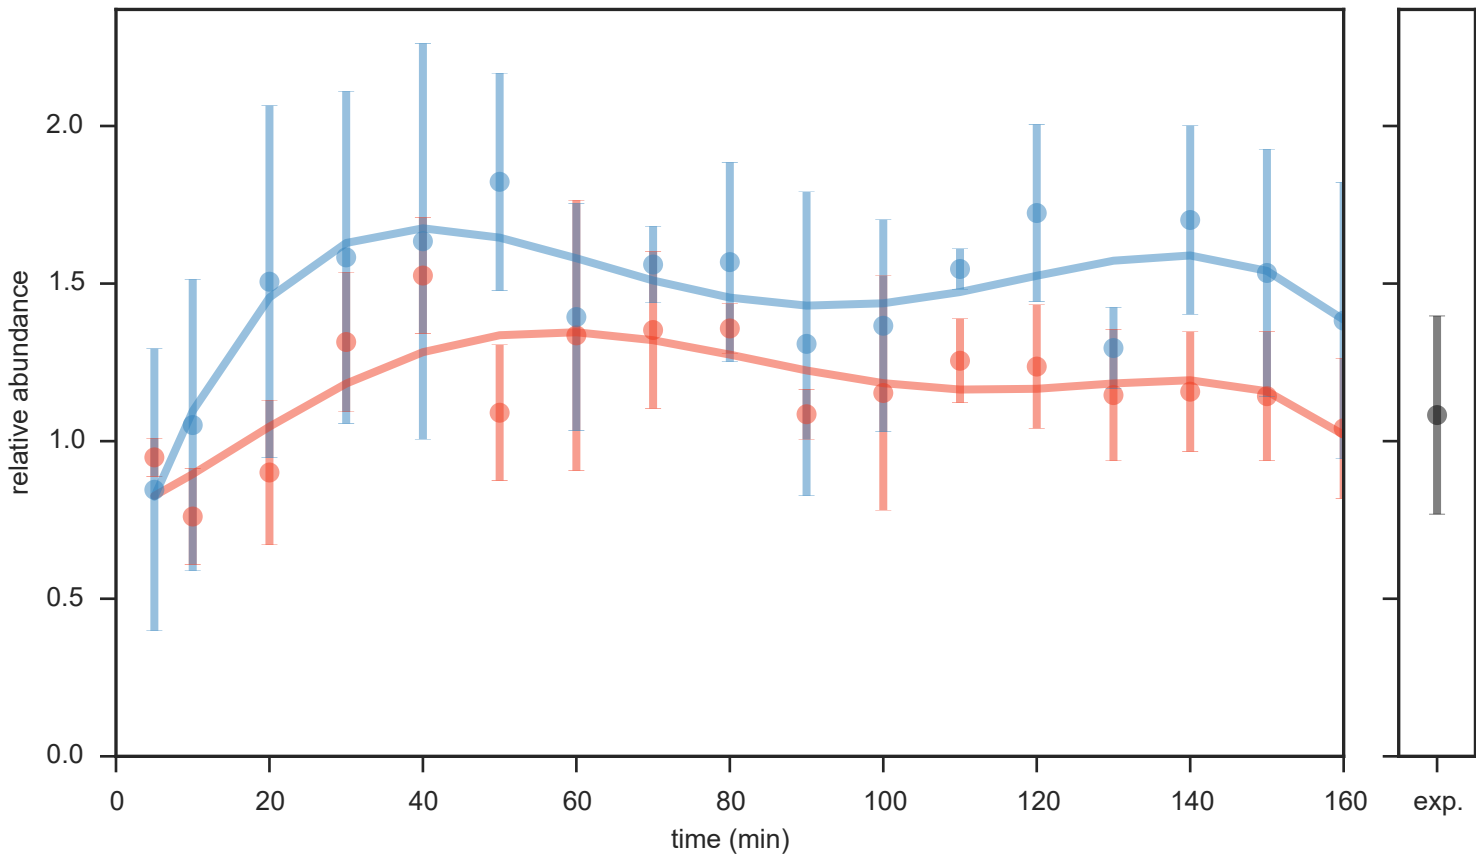

idms\_pid726\_mz617.87

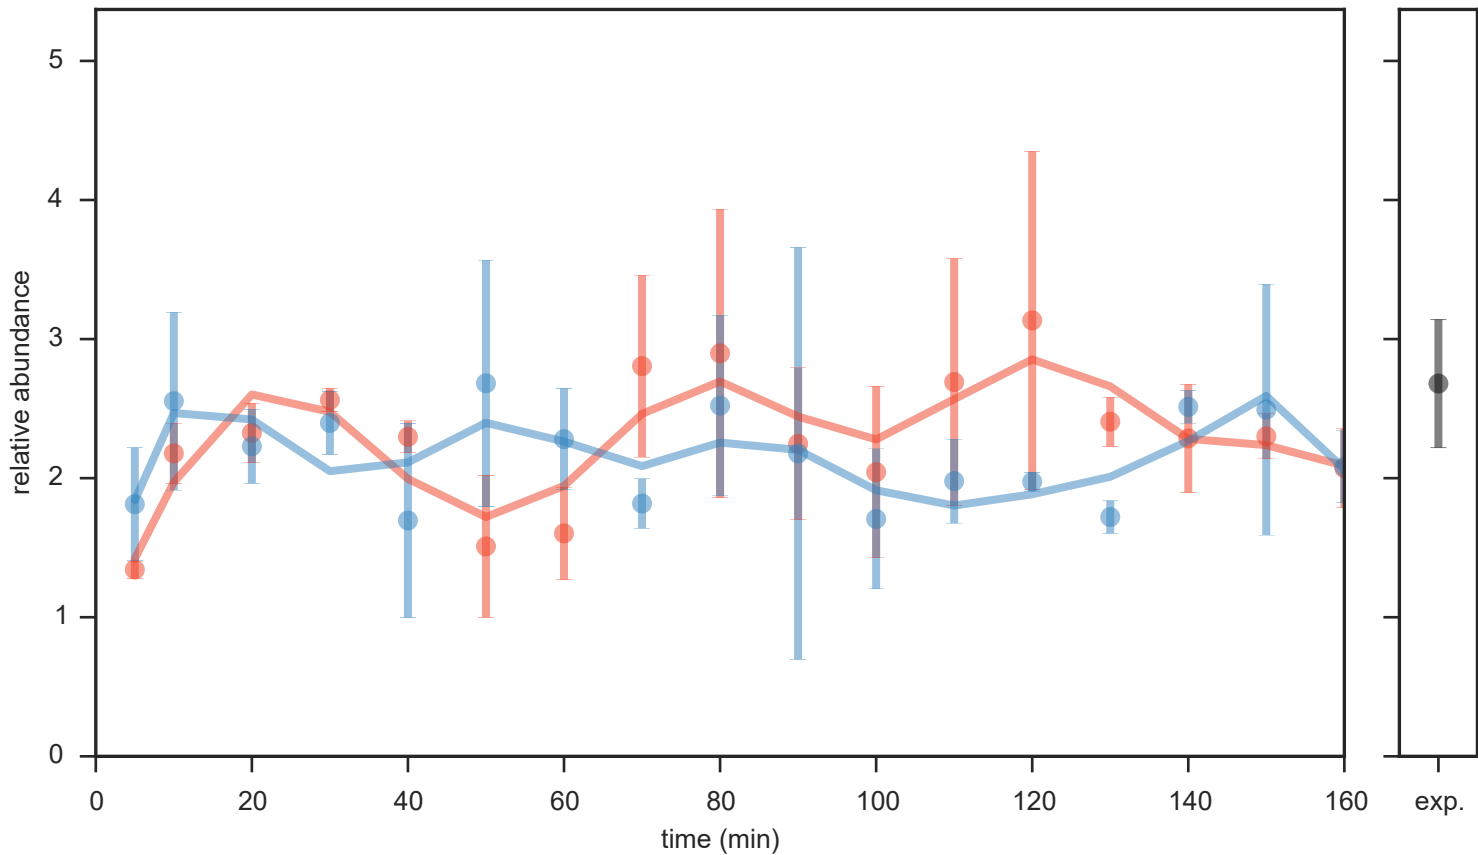

idms\_pid727\_mz267.50

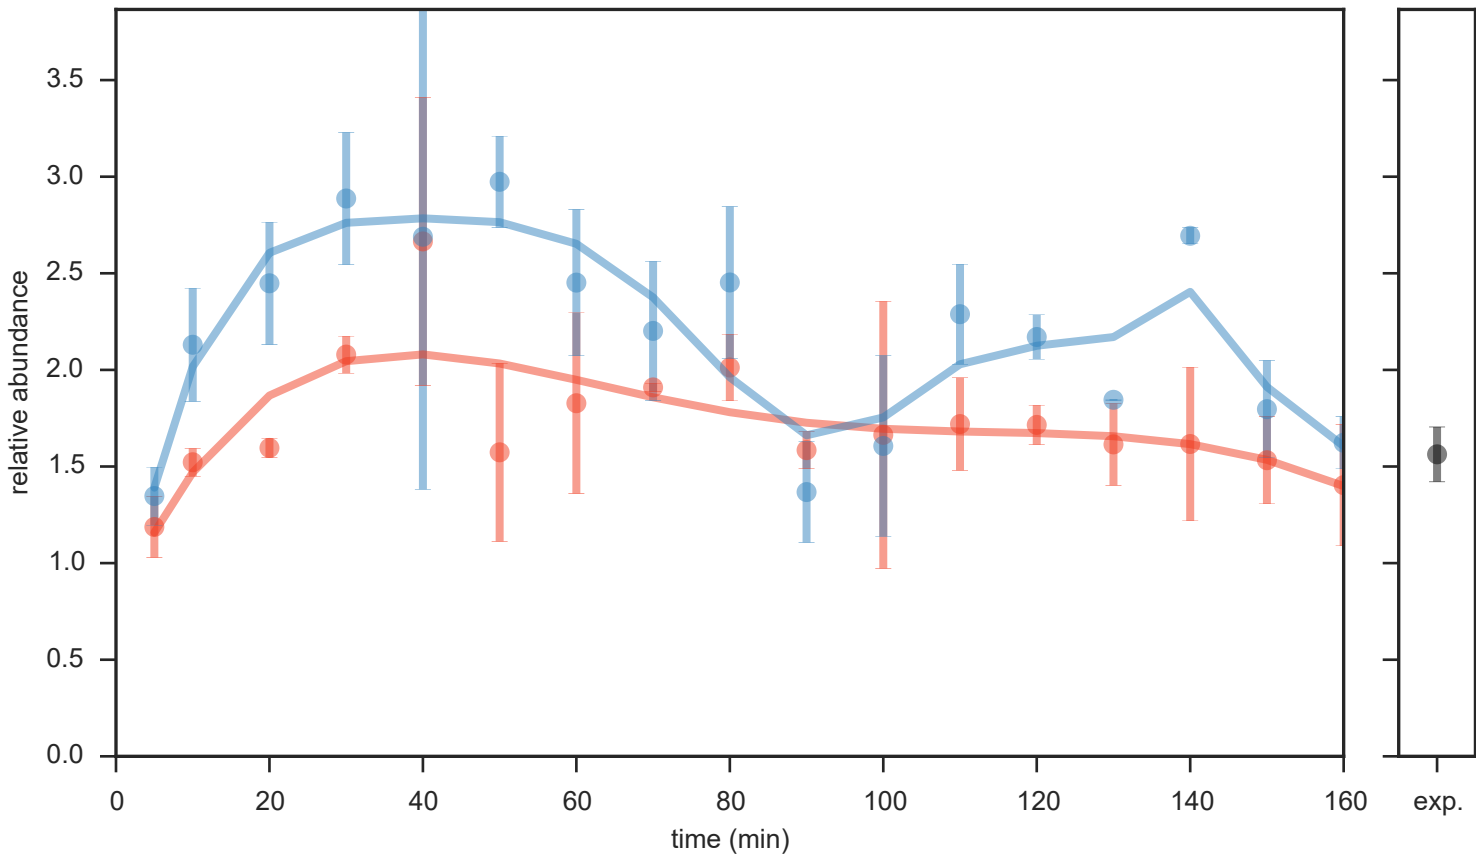

idms\_pid730\_mz132.02

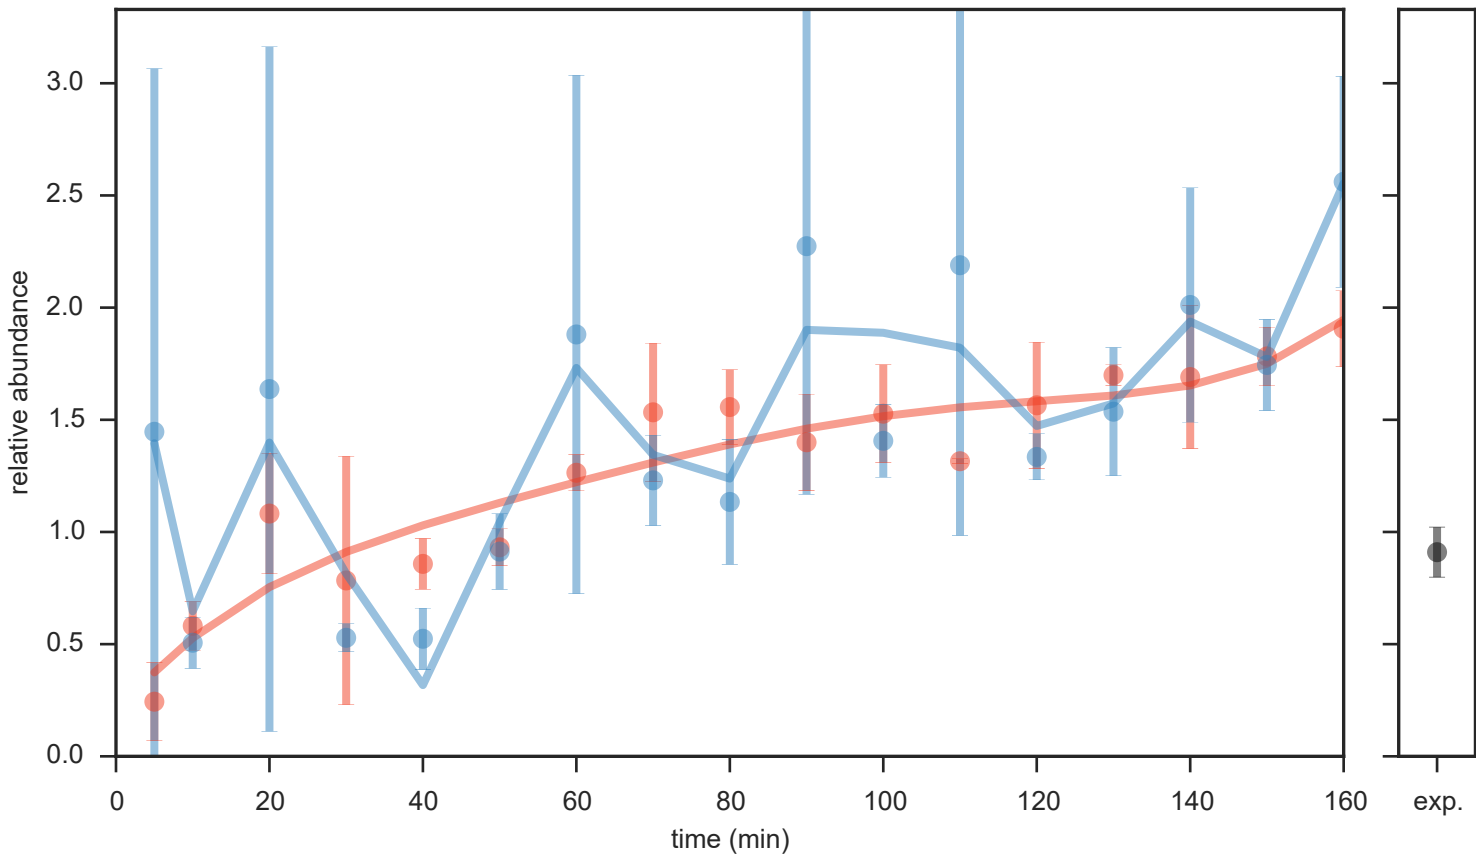

idms\_pid733\_mz282.52

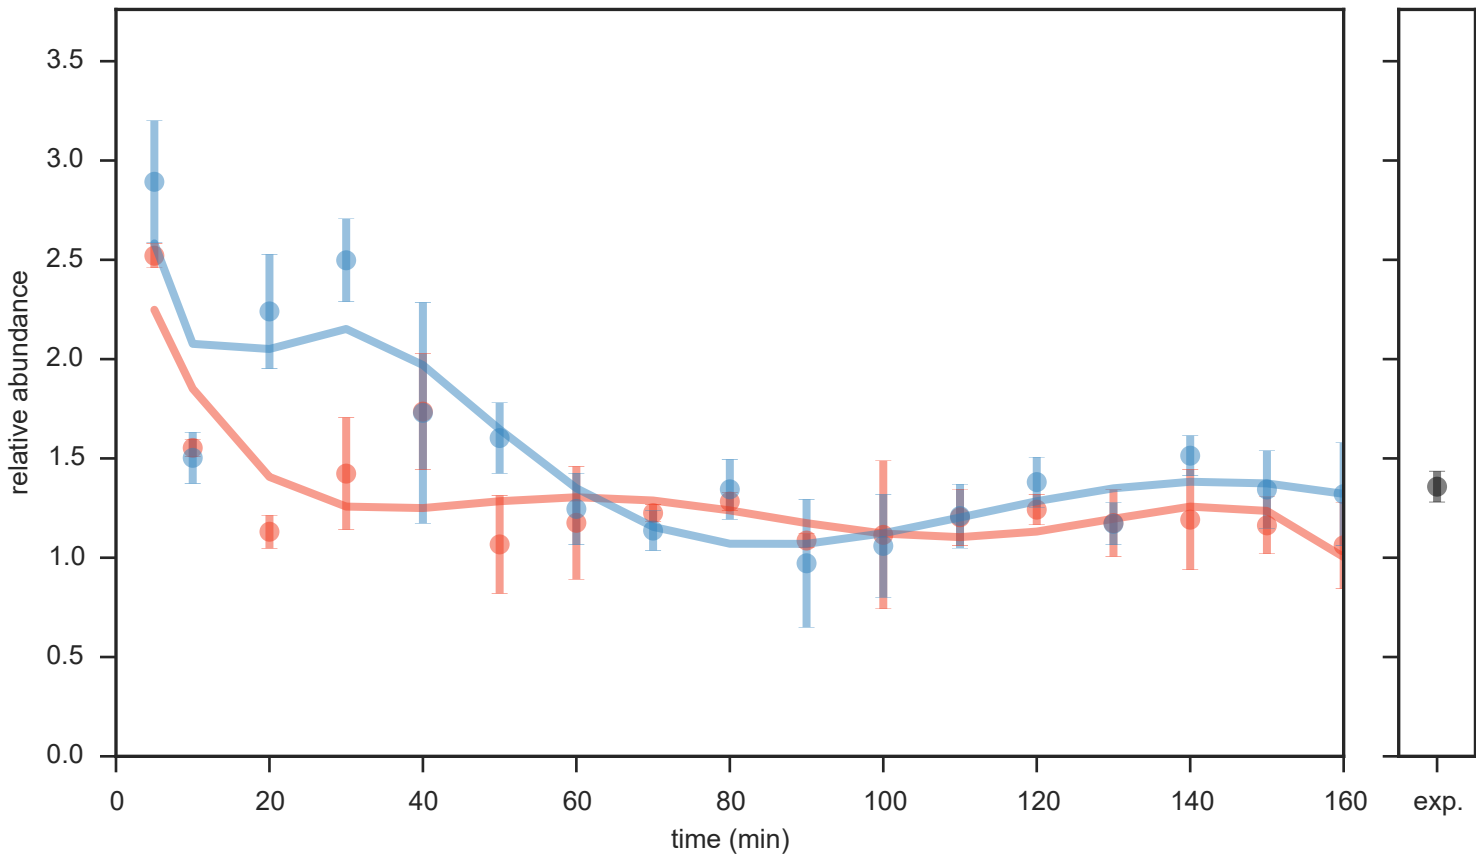



idms\_pid738\_mz268.94

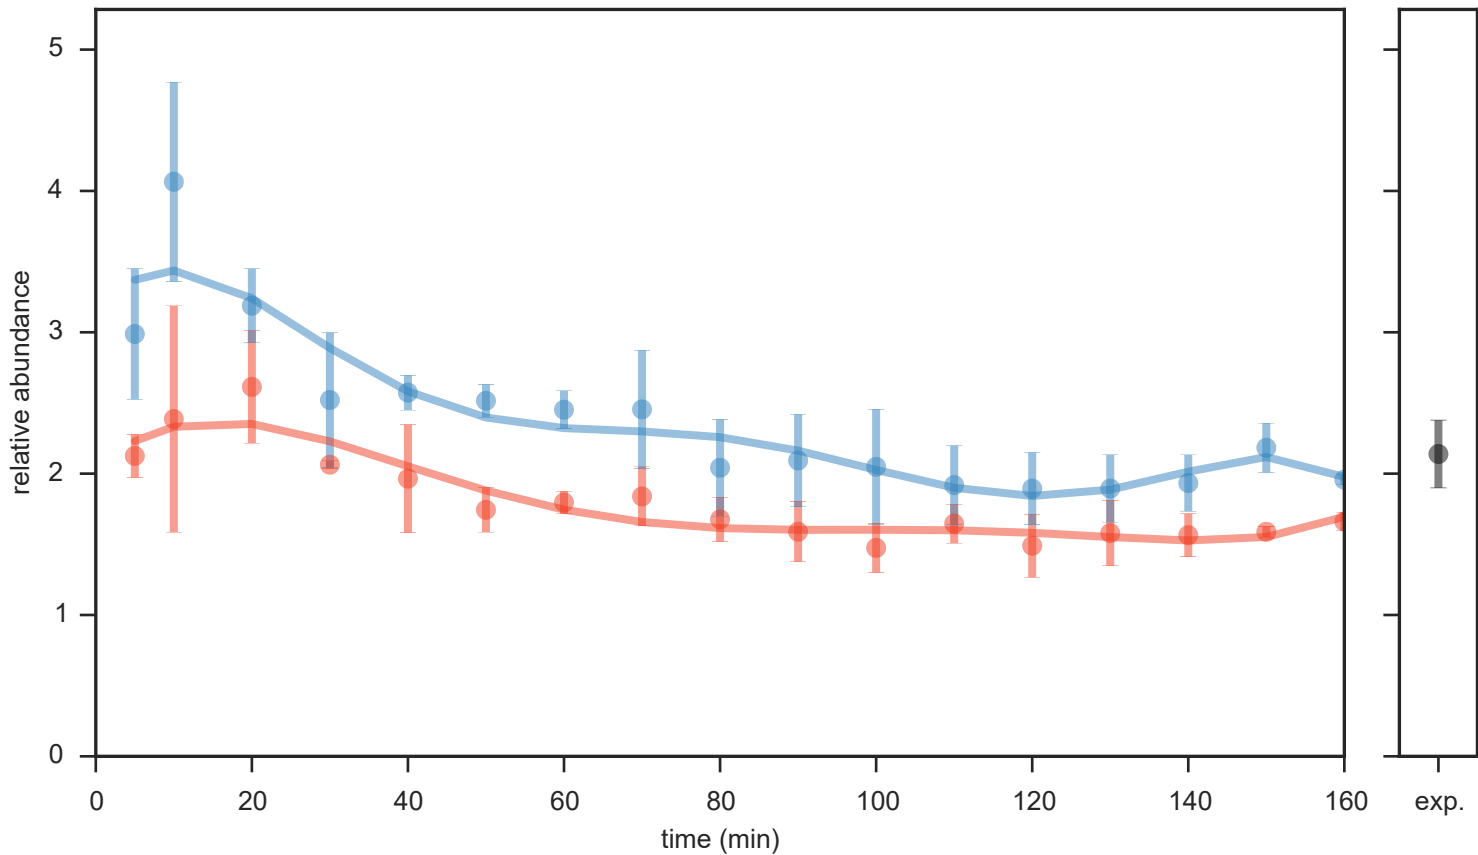

idms\_pid739\_mz229.01

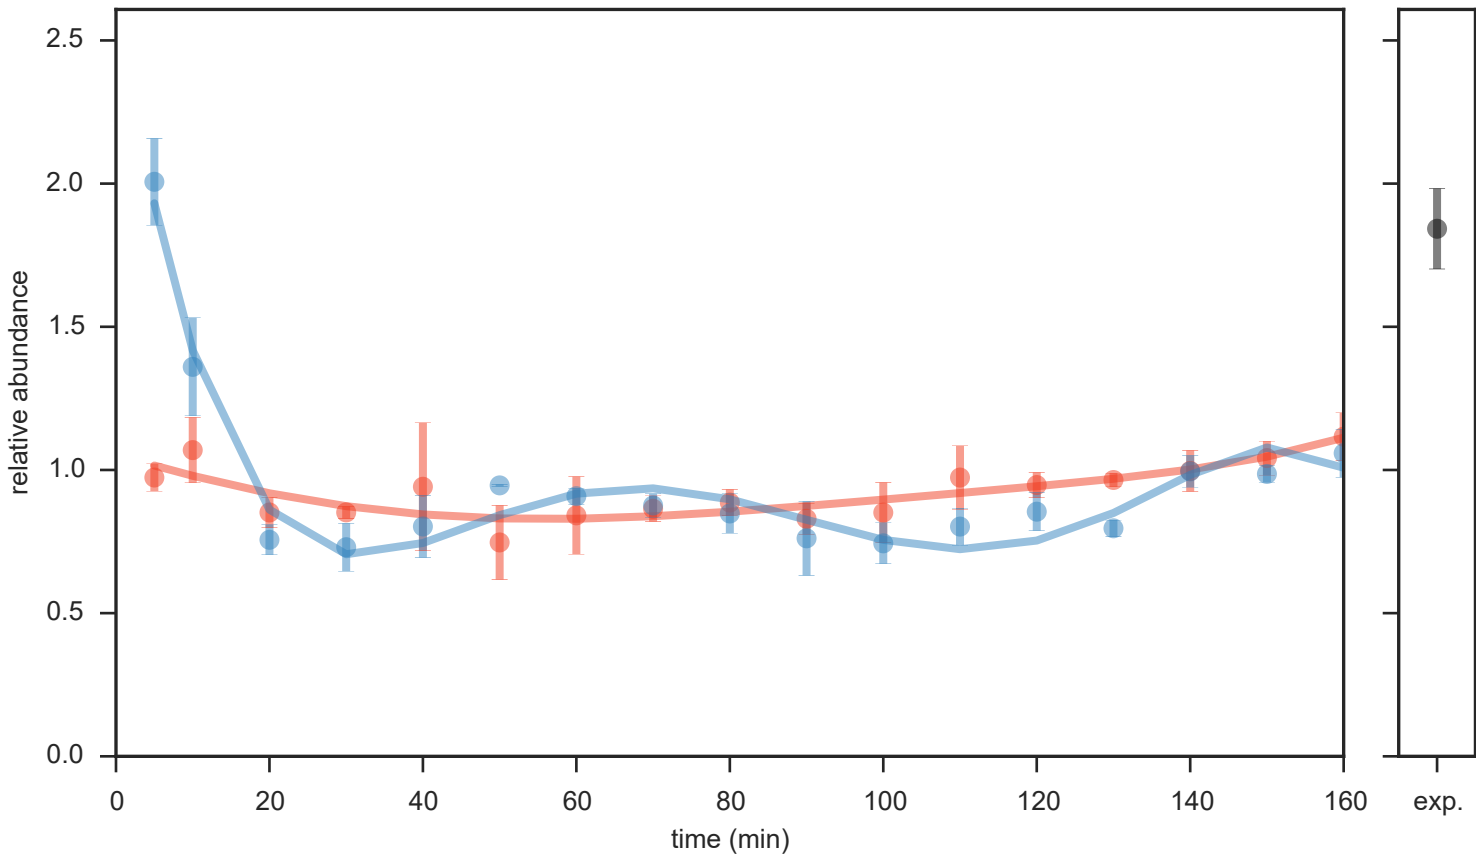

idms\_pid748\_mz302.53

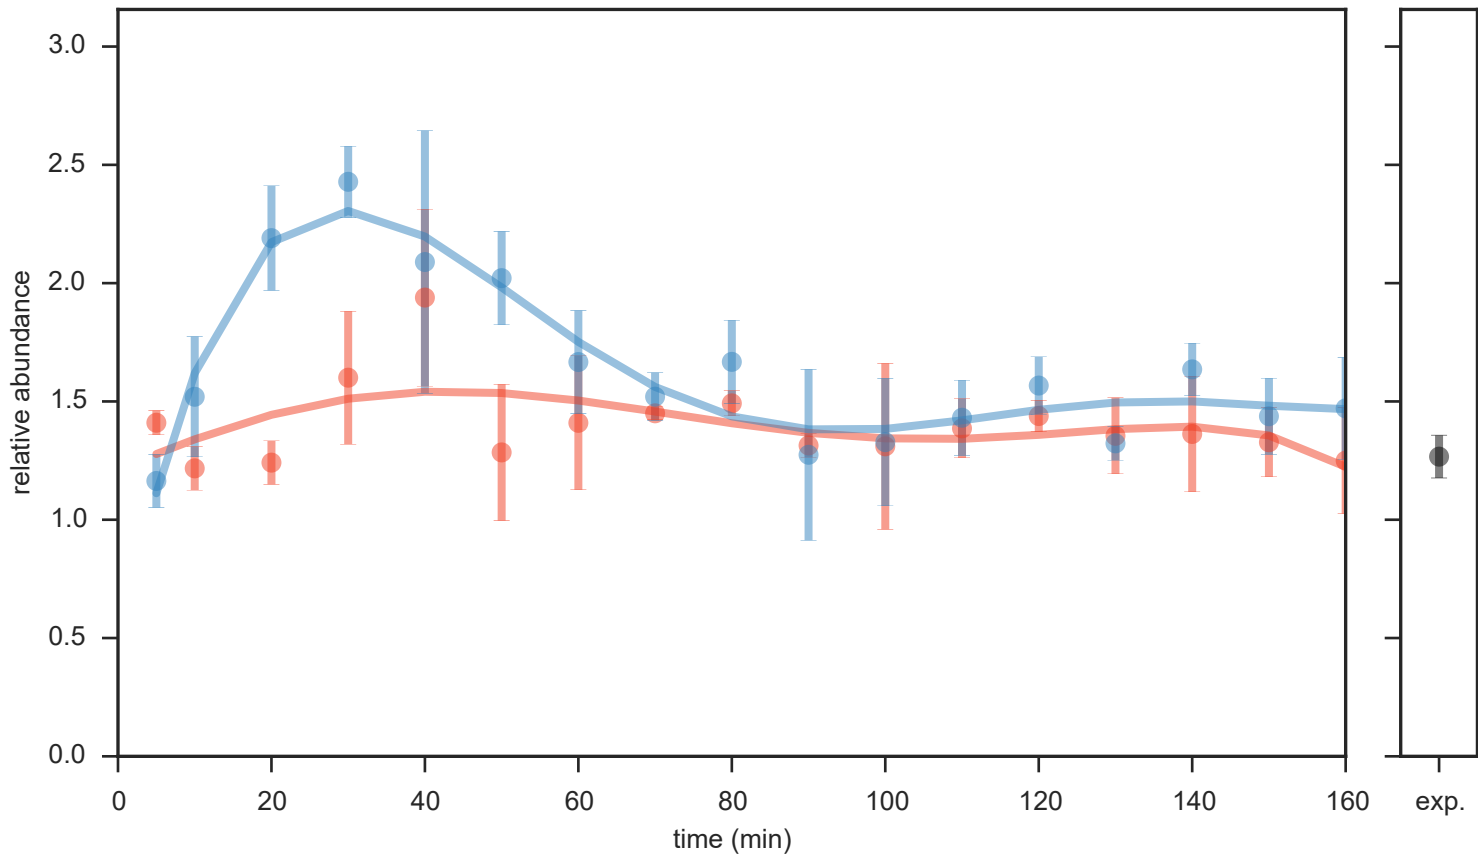

idms\_pid777\_mz305.06

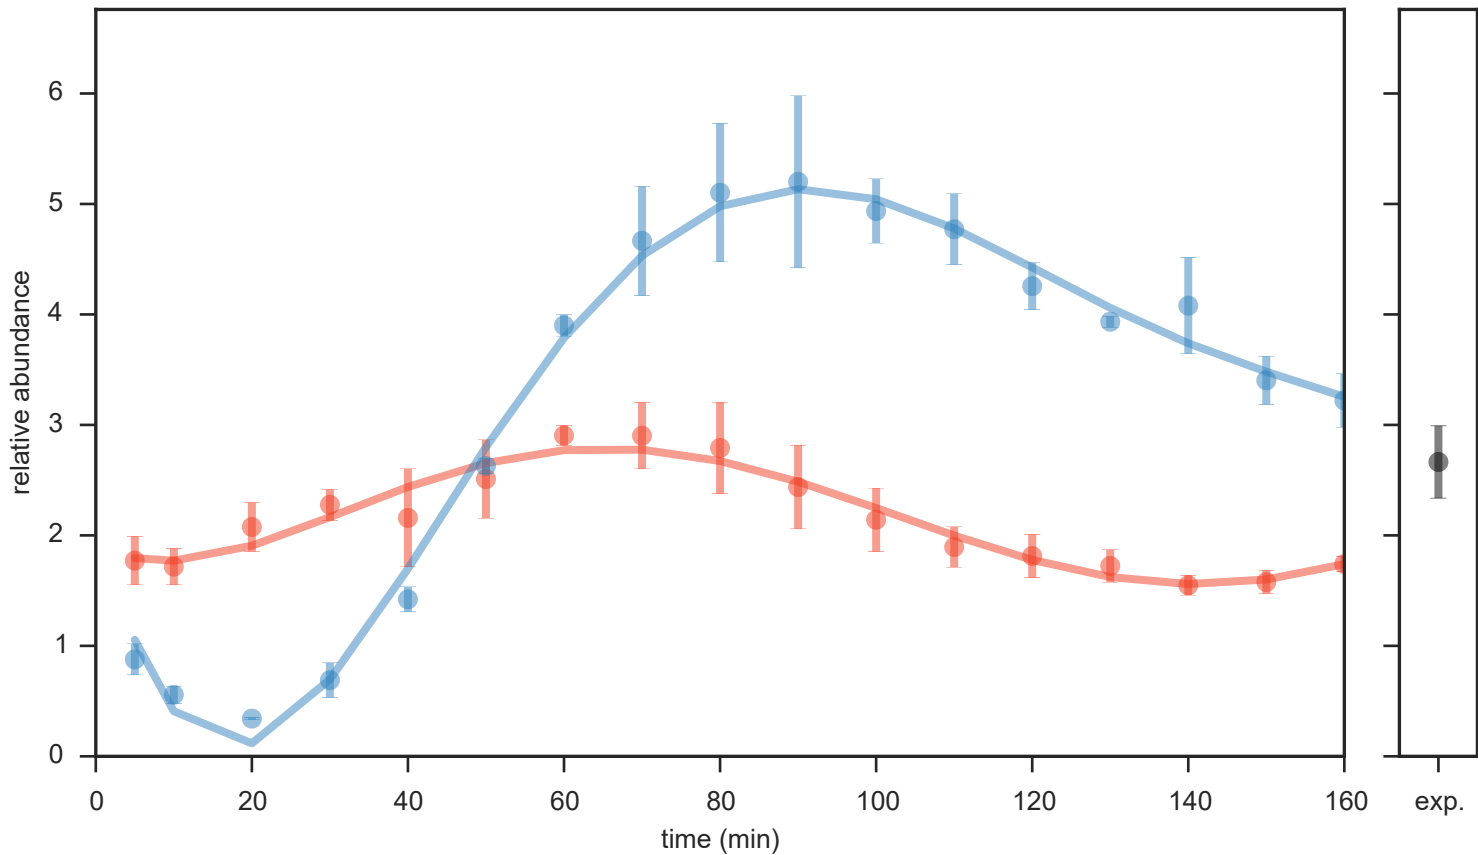

idms\_pid778\_mz168.98

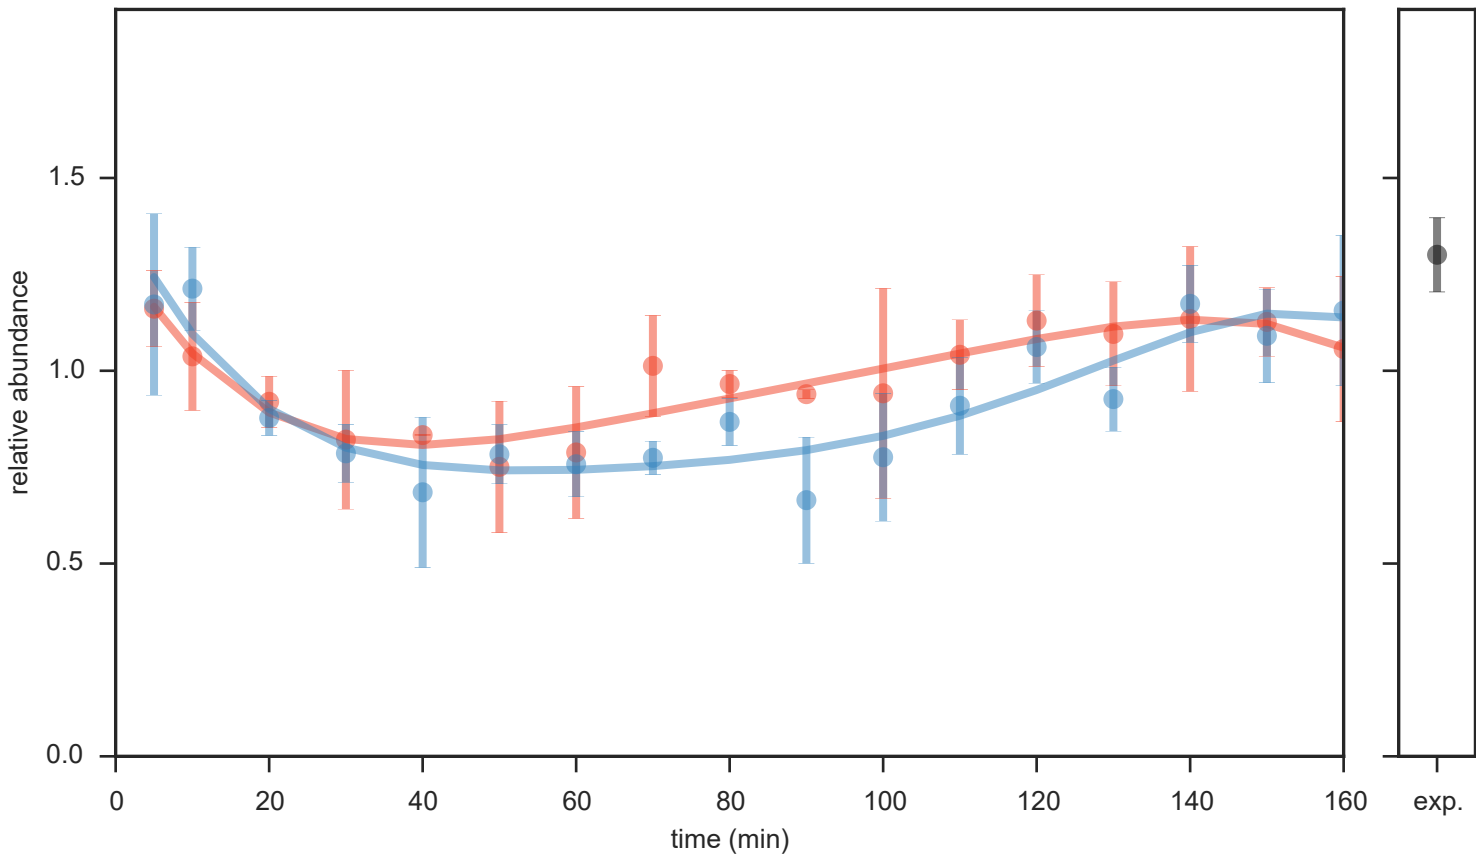

idms\_pid780\_mz175.03

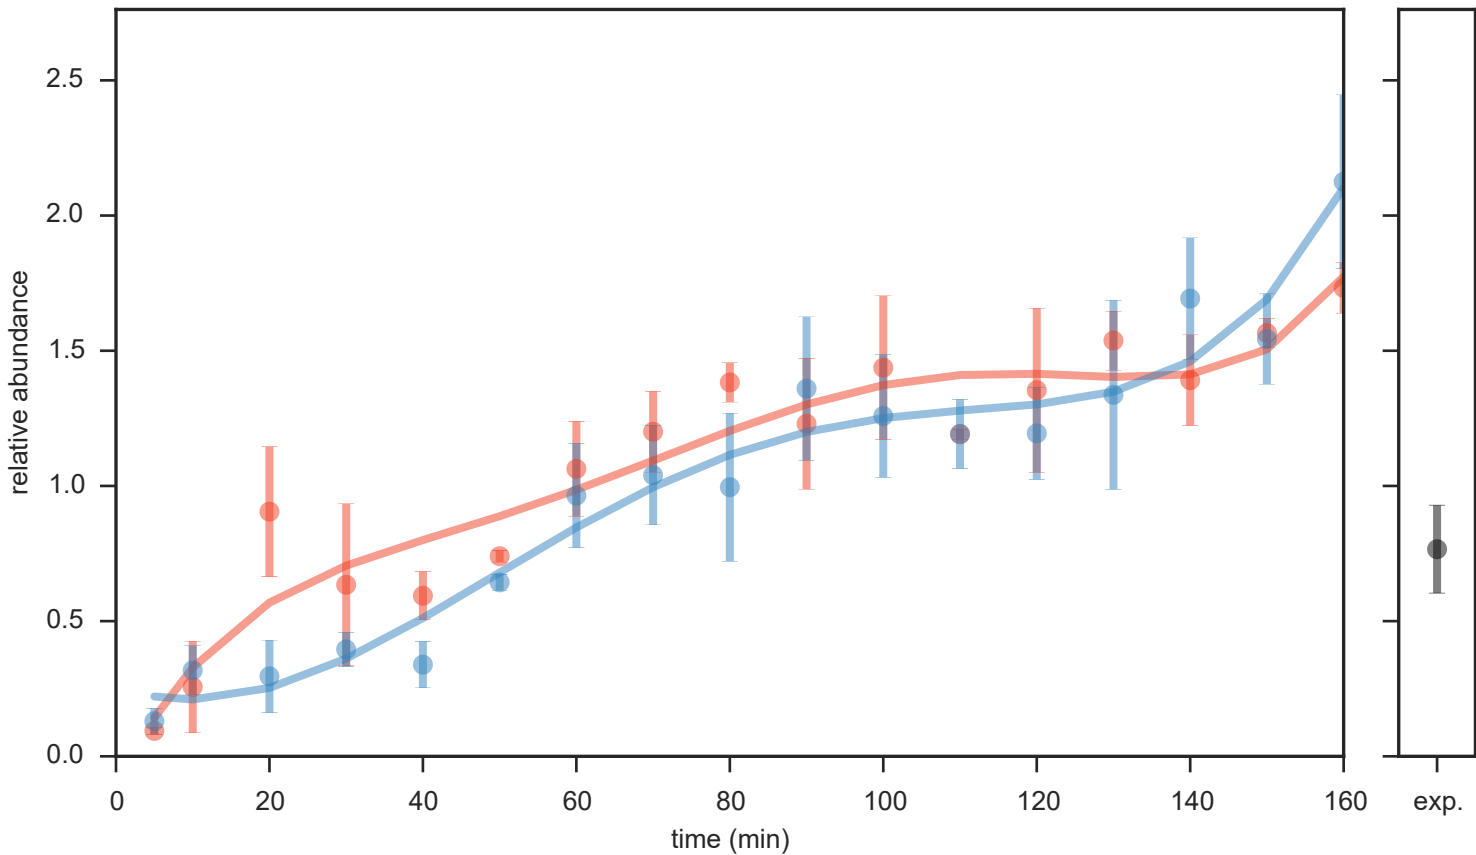

idms\_pid784\_mz330.05

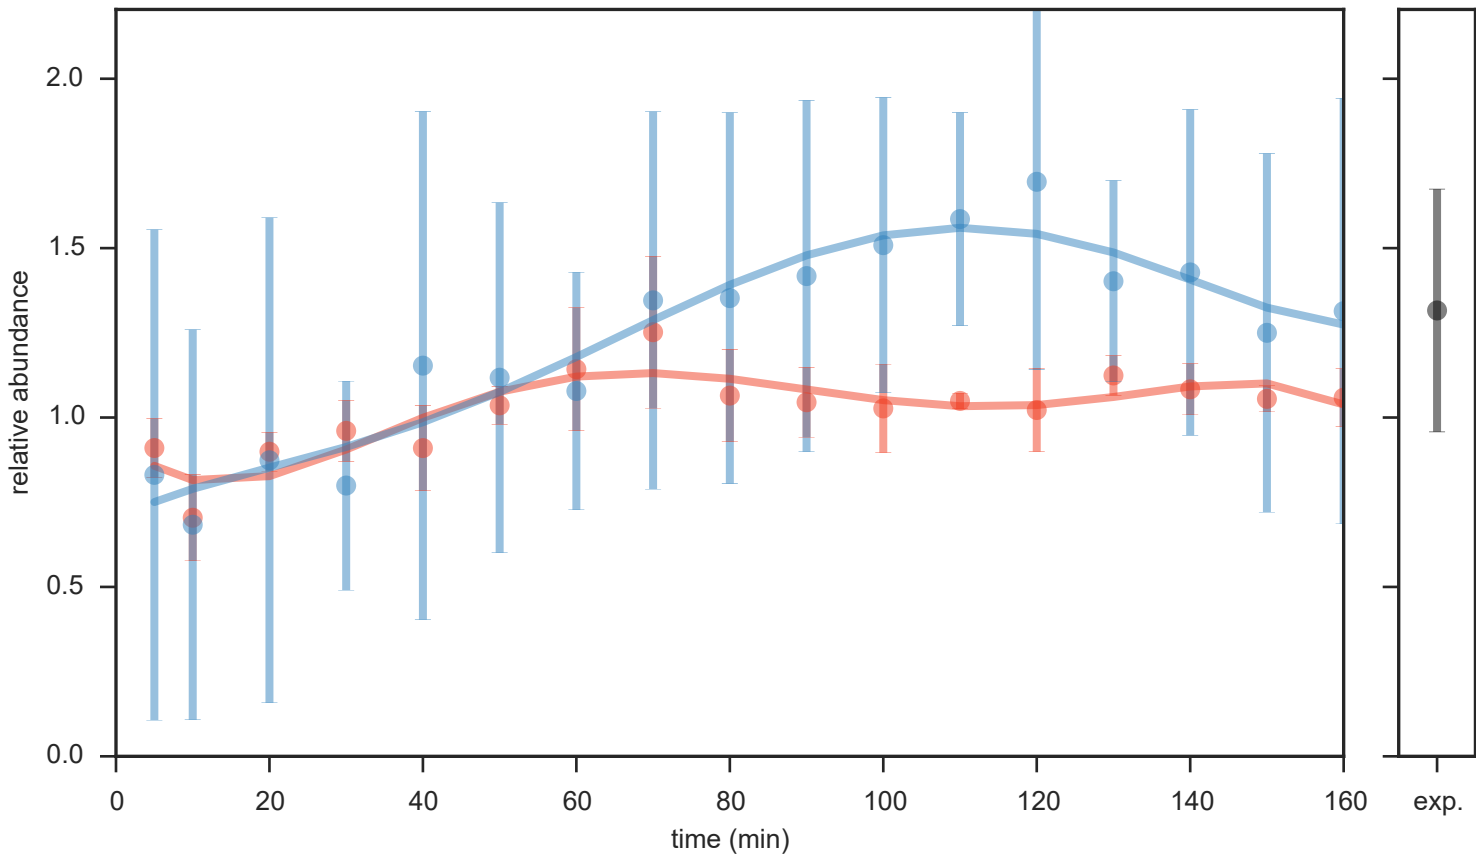

idms\_pid788\_mz595.66

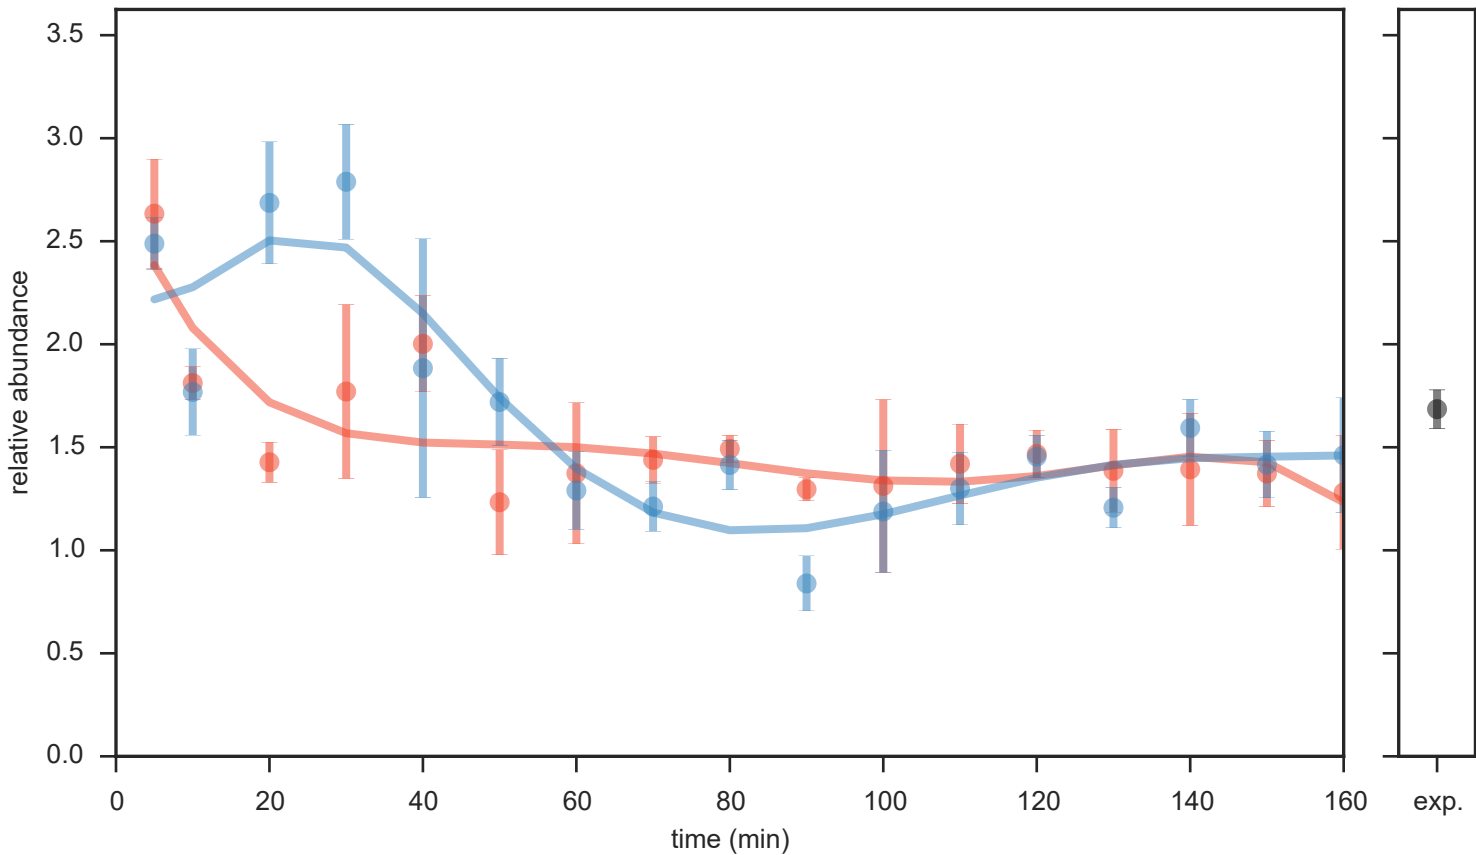



idms\_pid798\_mz137.98

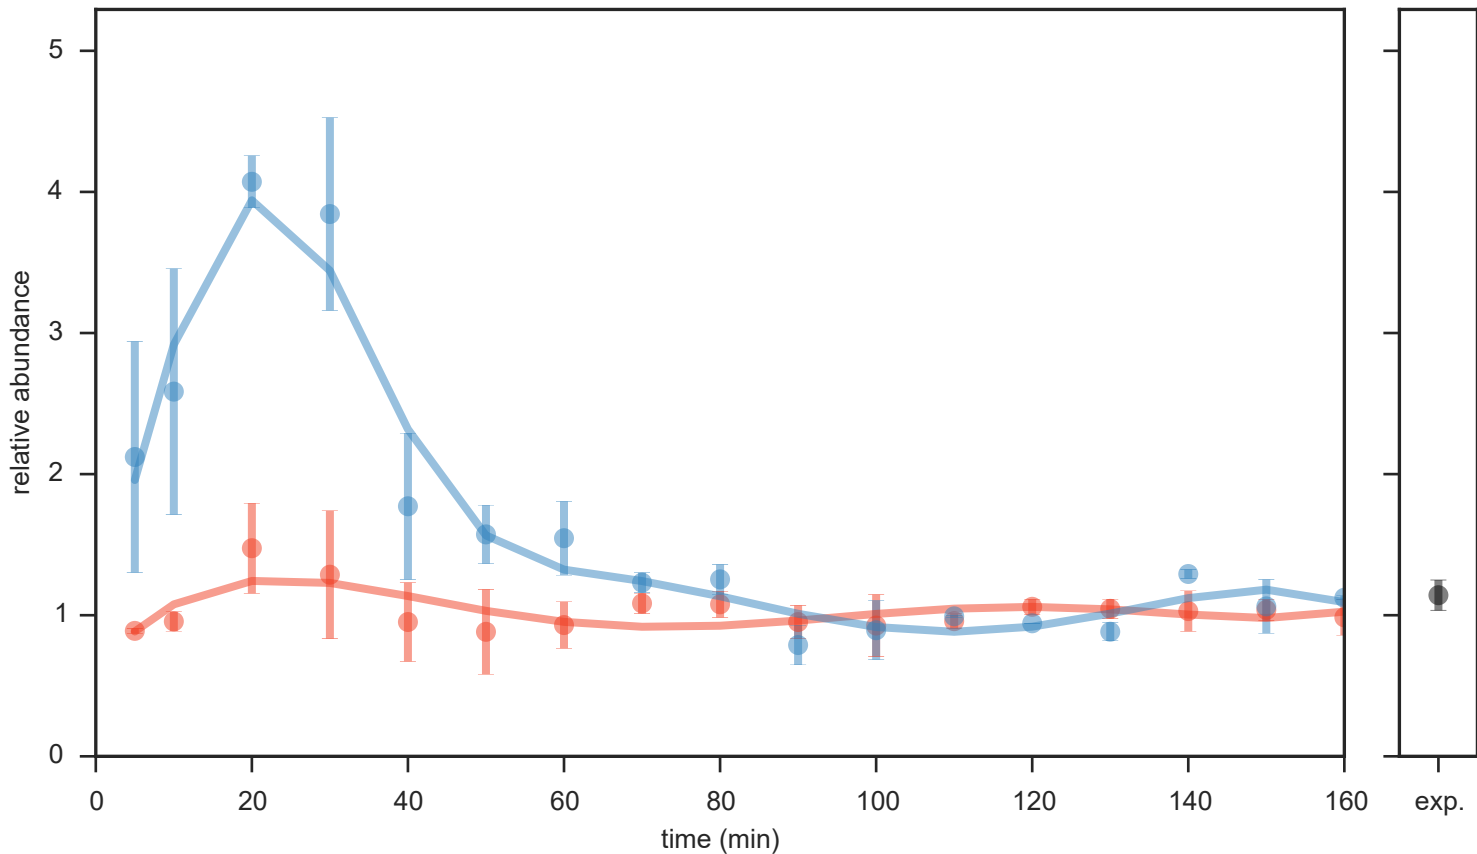

idms\_pid807\_mz288.50

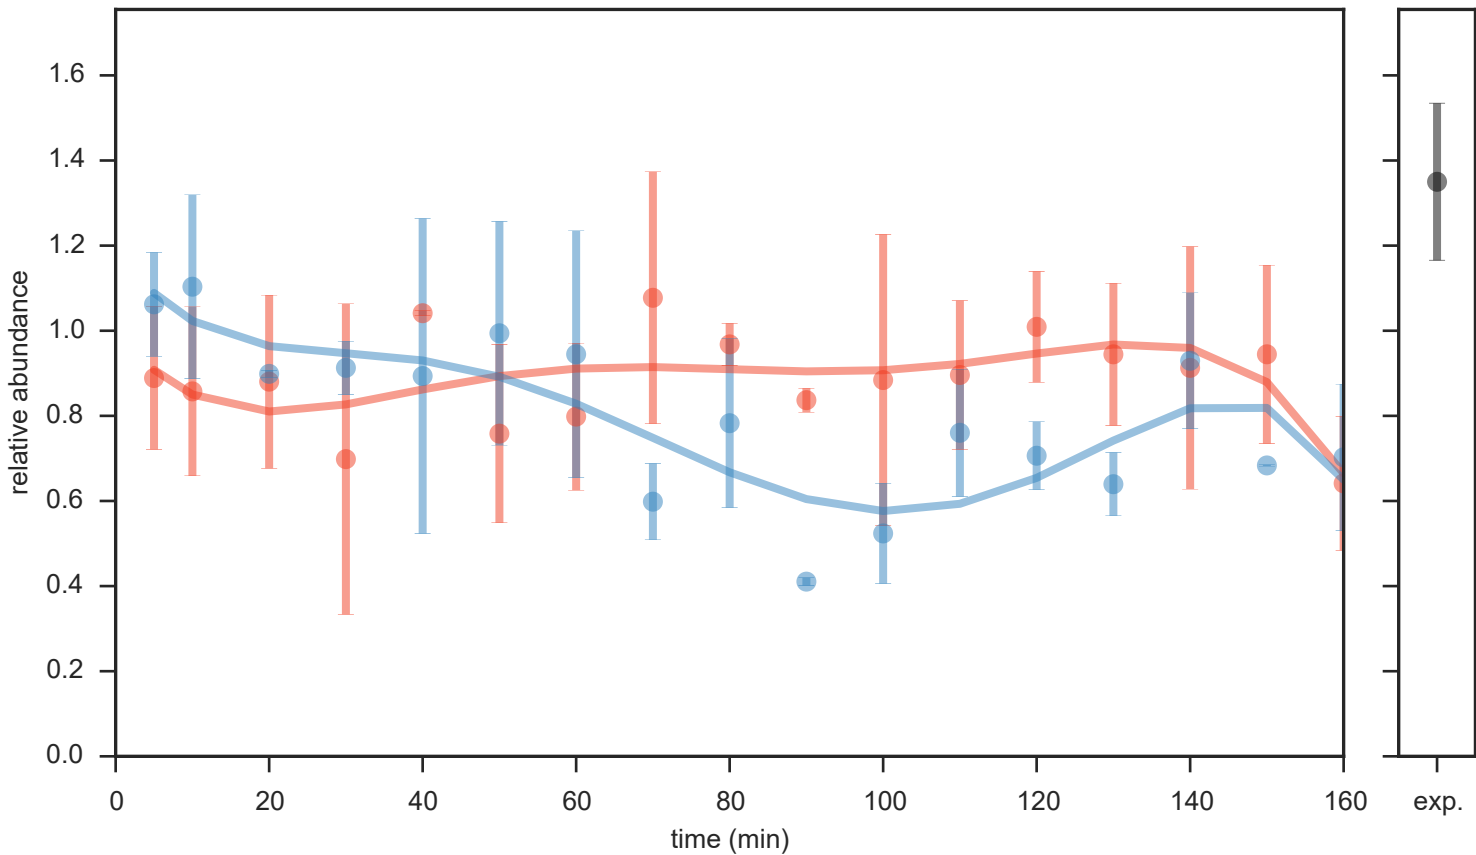

idms\_pid820\_mz371.00

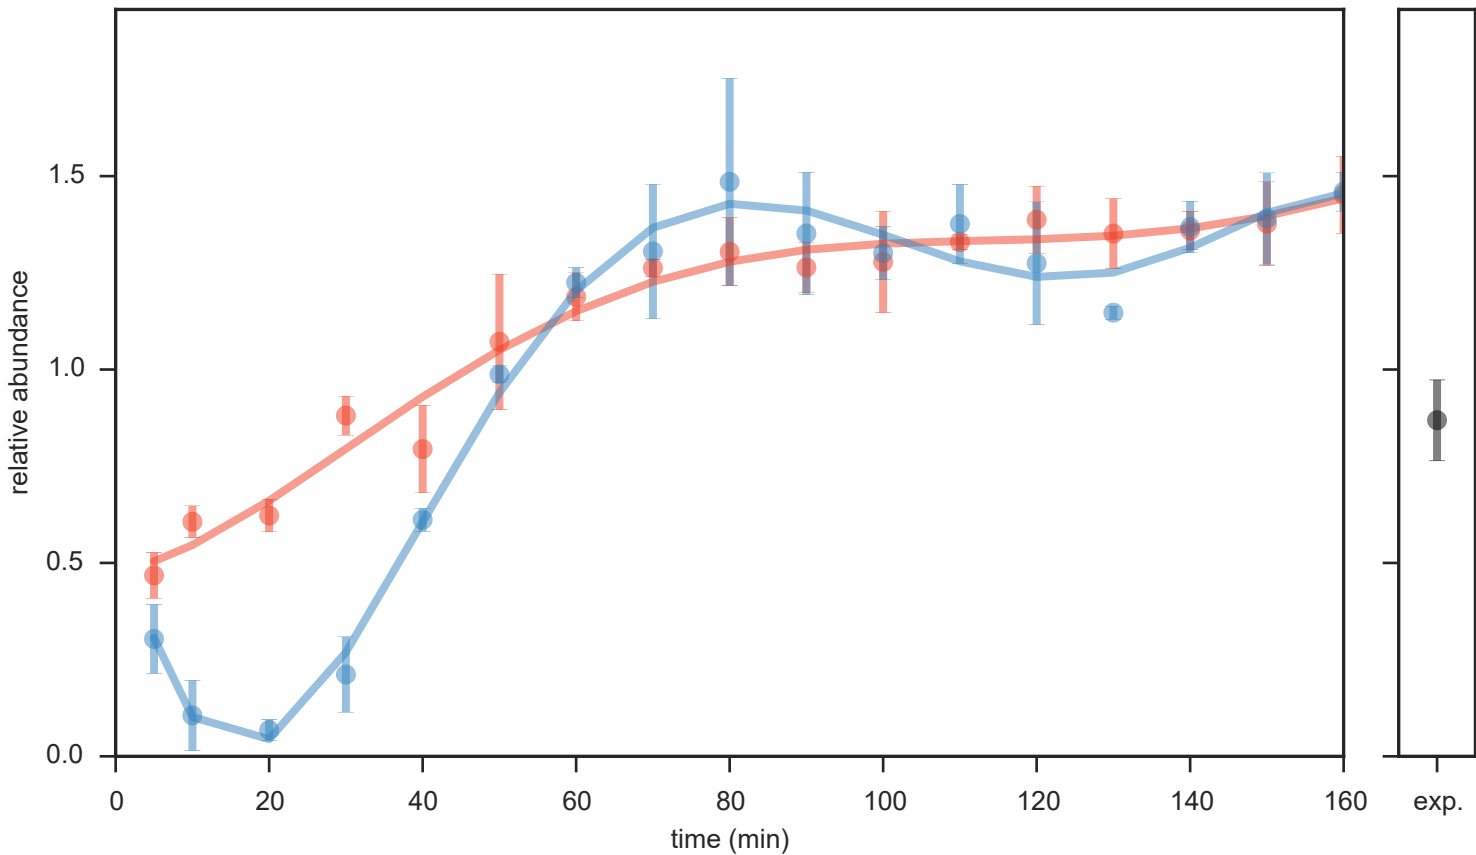

idms\_pid825\_mz204.50

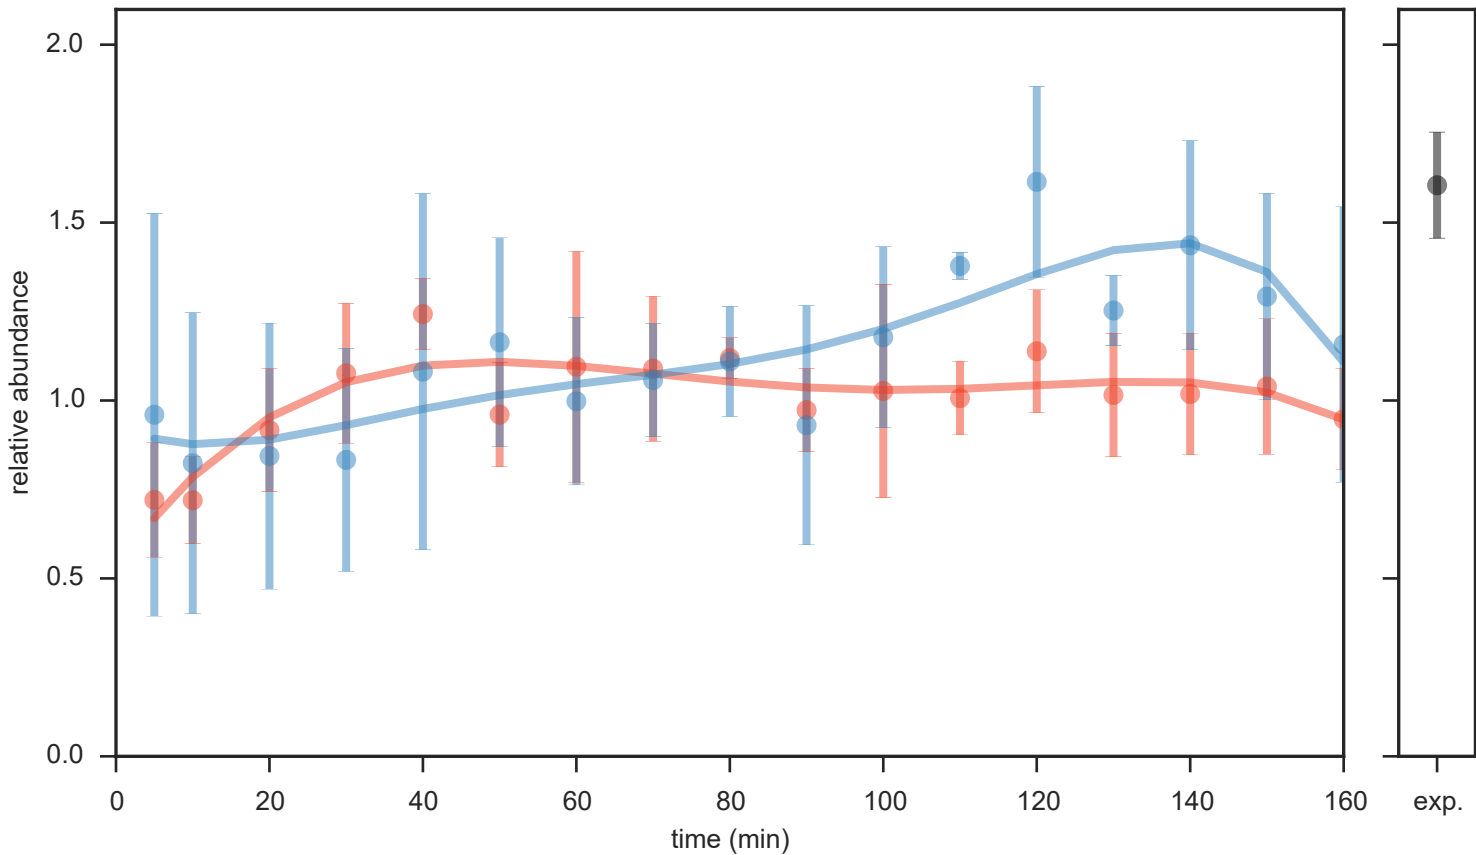

idms\_pid835\_mz259.53

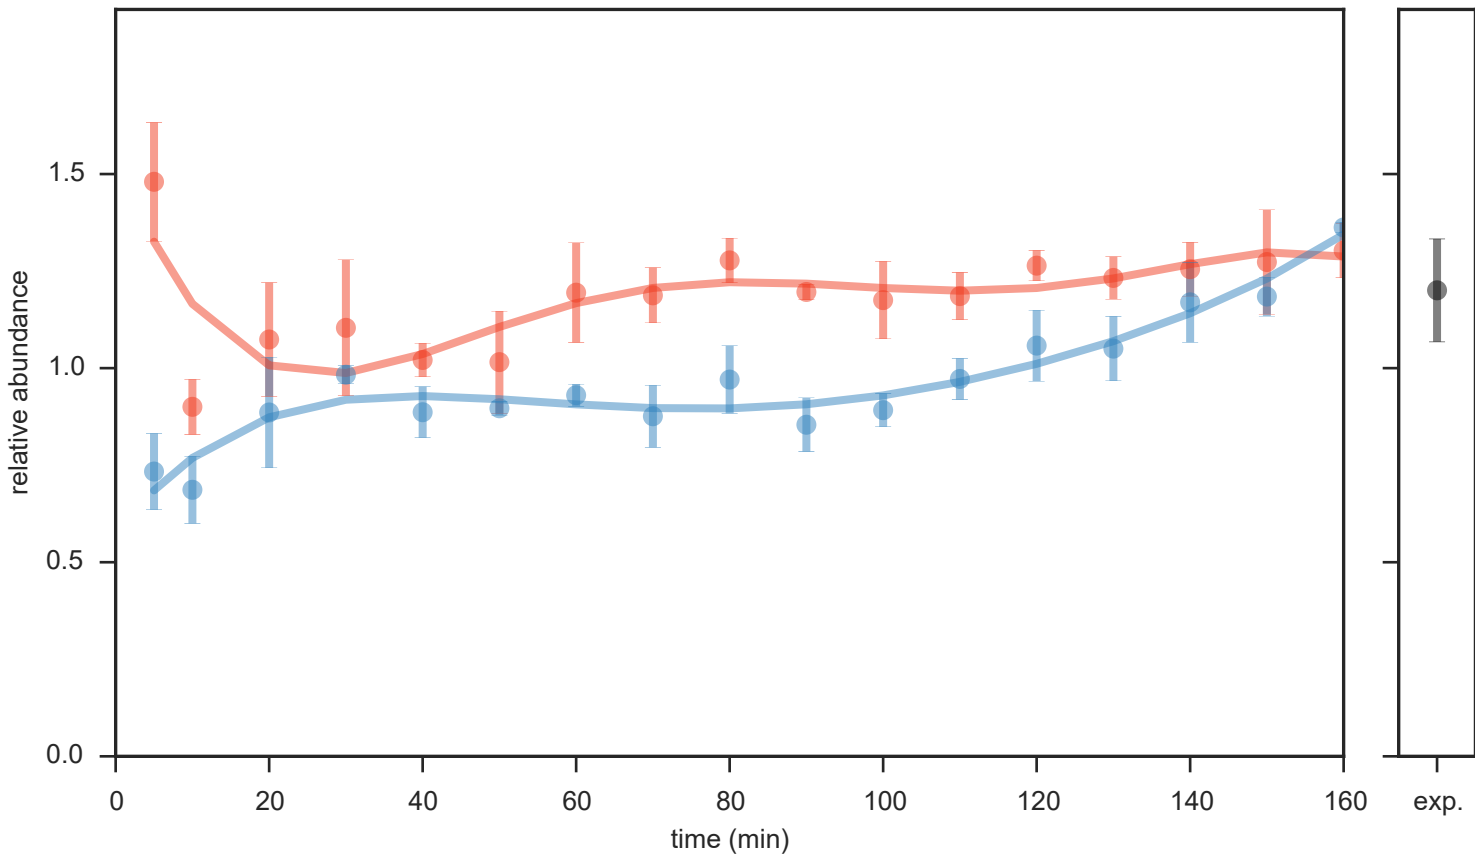

idms\_pid840\_mz105.01

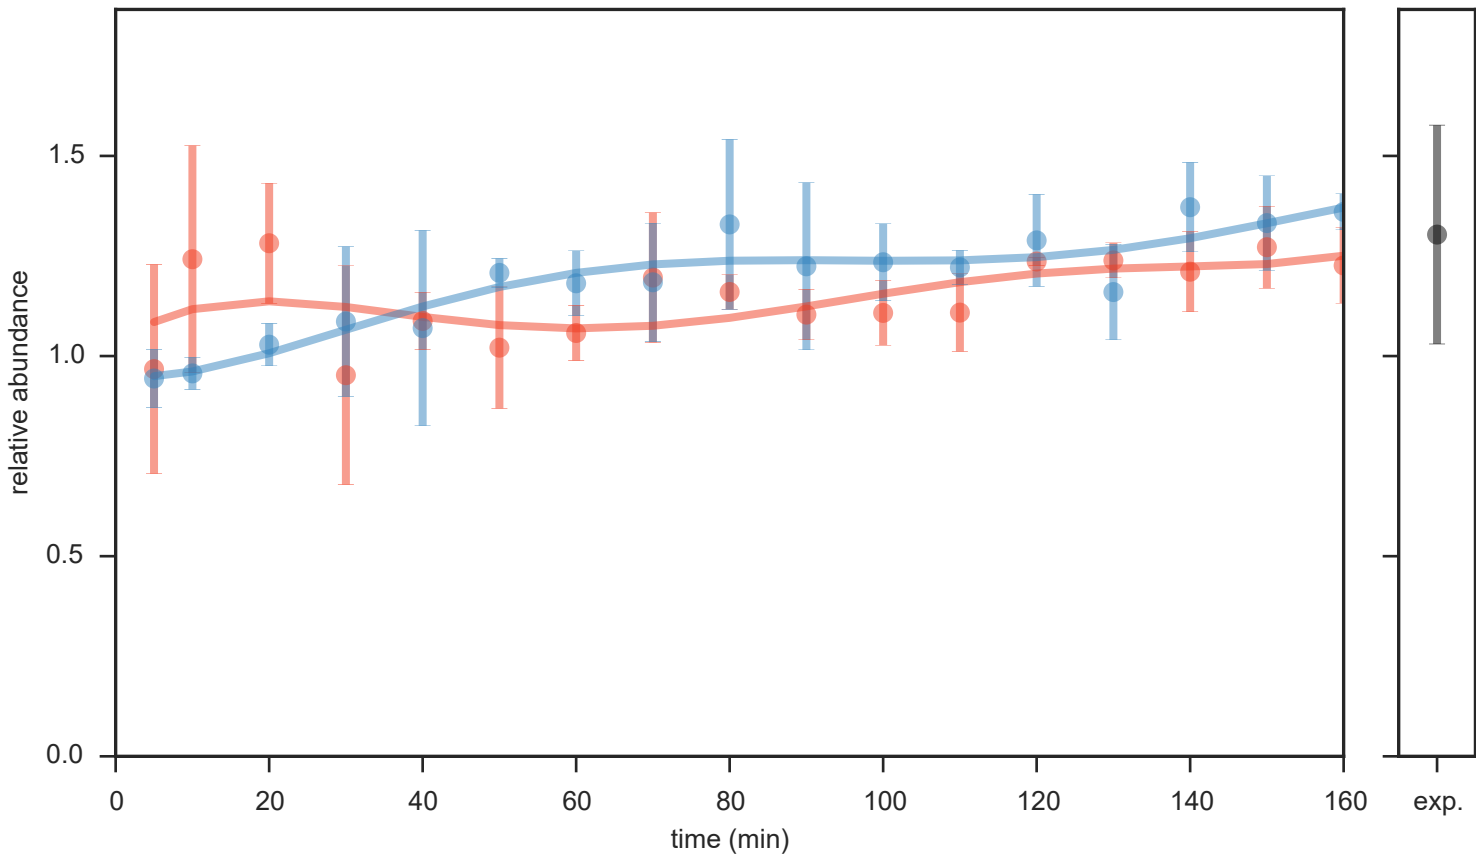

idms\_pid850\_mz289.00

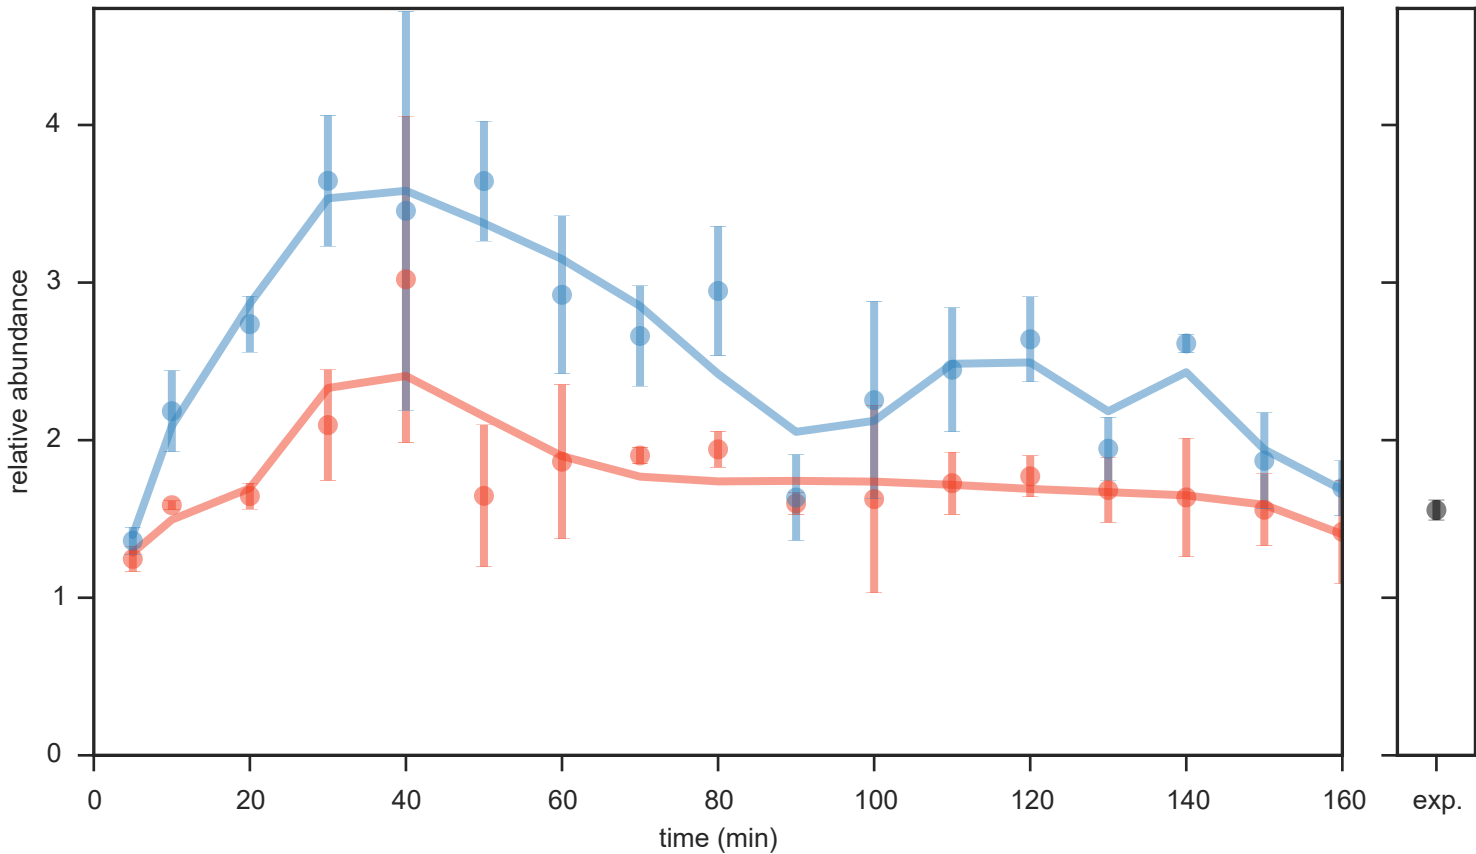

idms\_pid869\_mz176.52

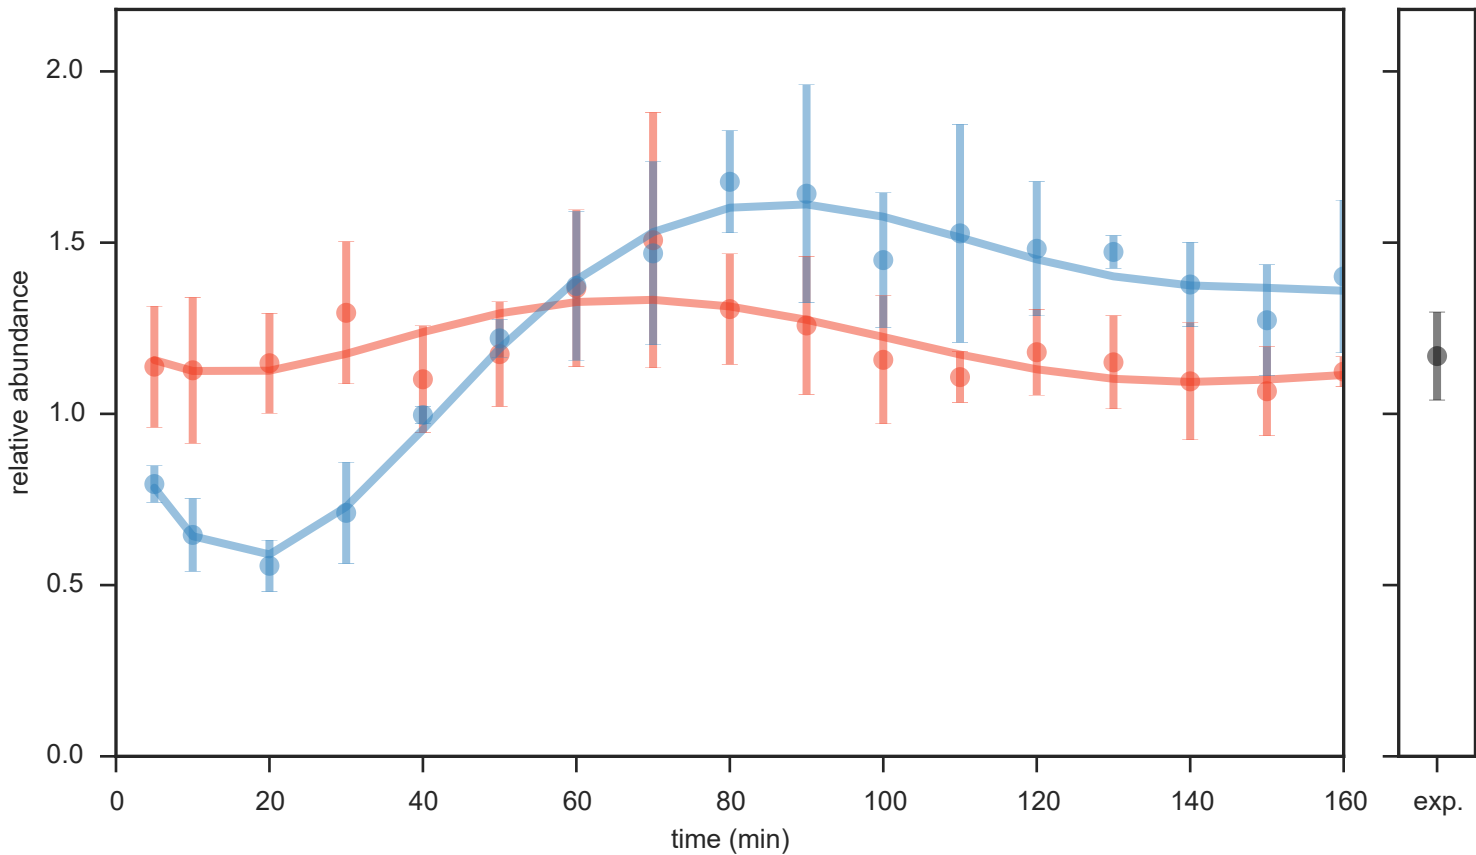



idms\_pid882\_mz330.06

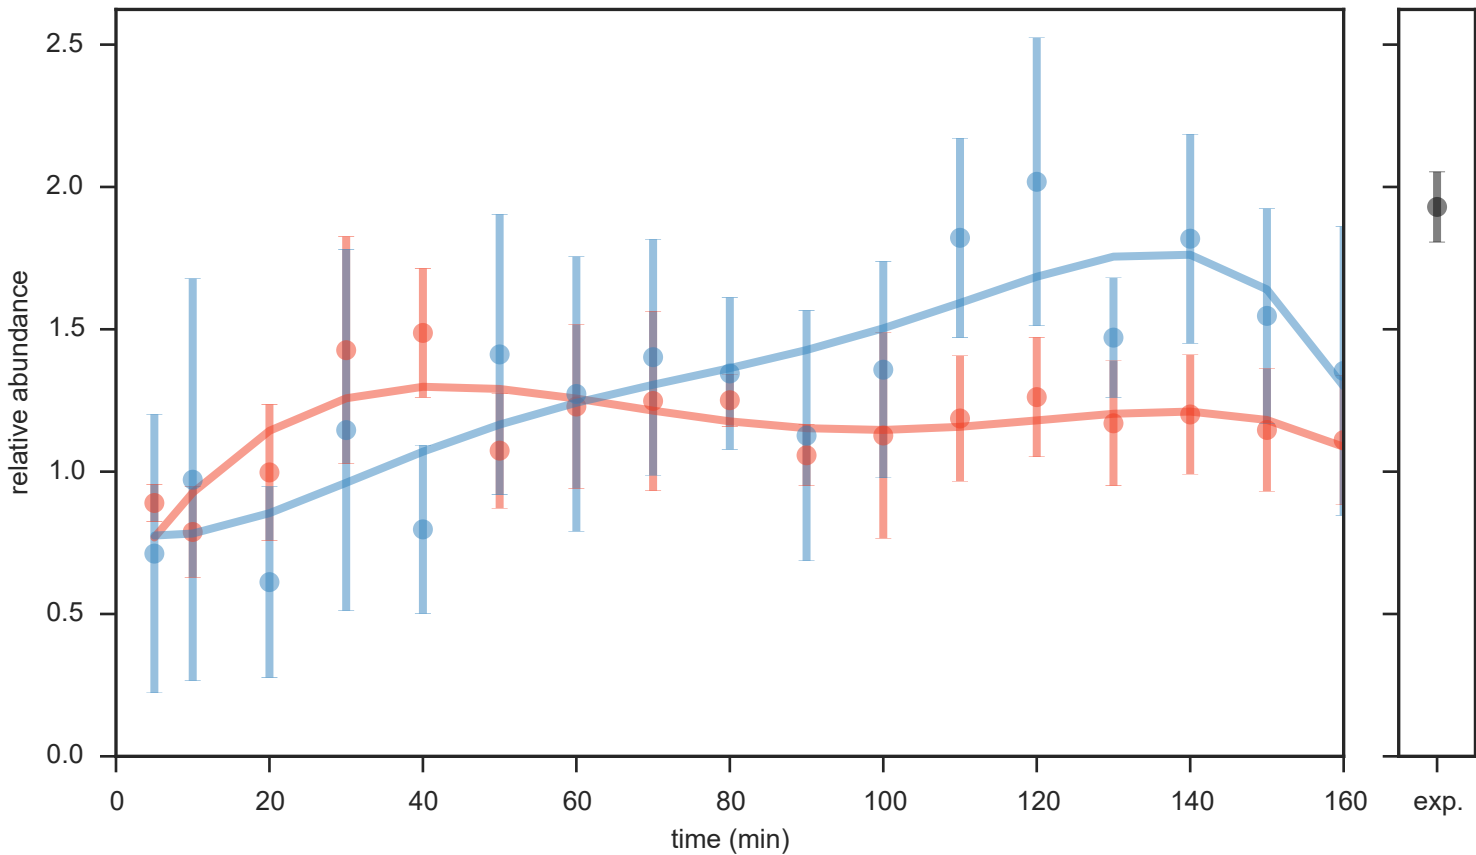

idms\_pid884\_mz118.04

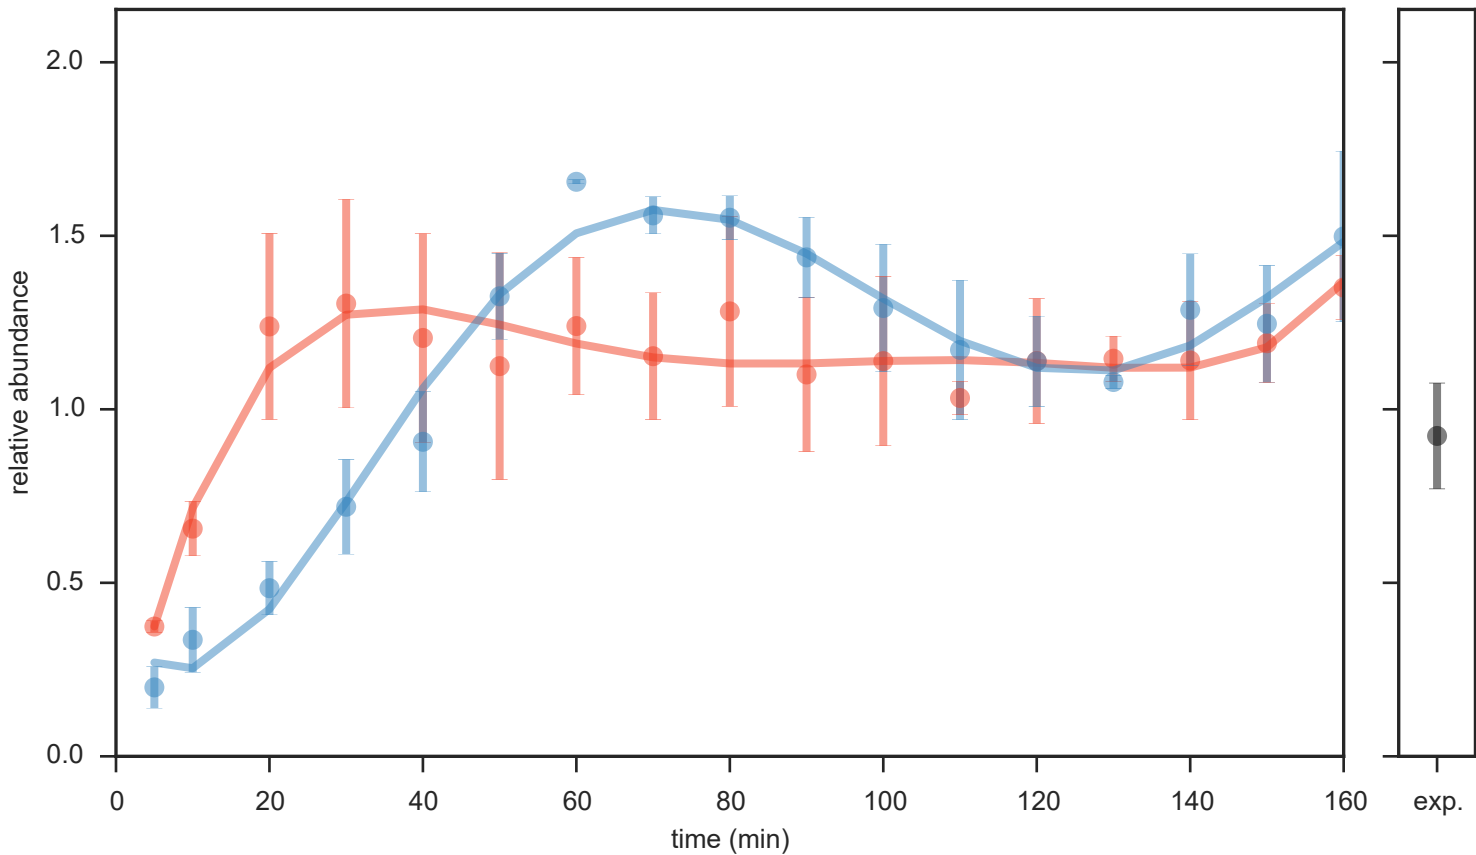

idms\_pid898\_mz858.05

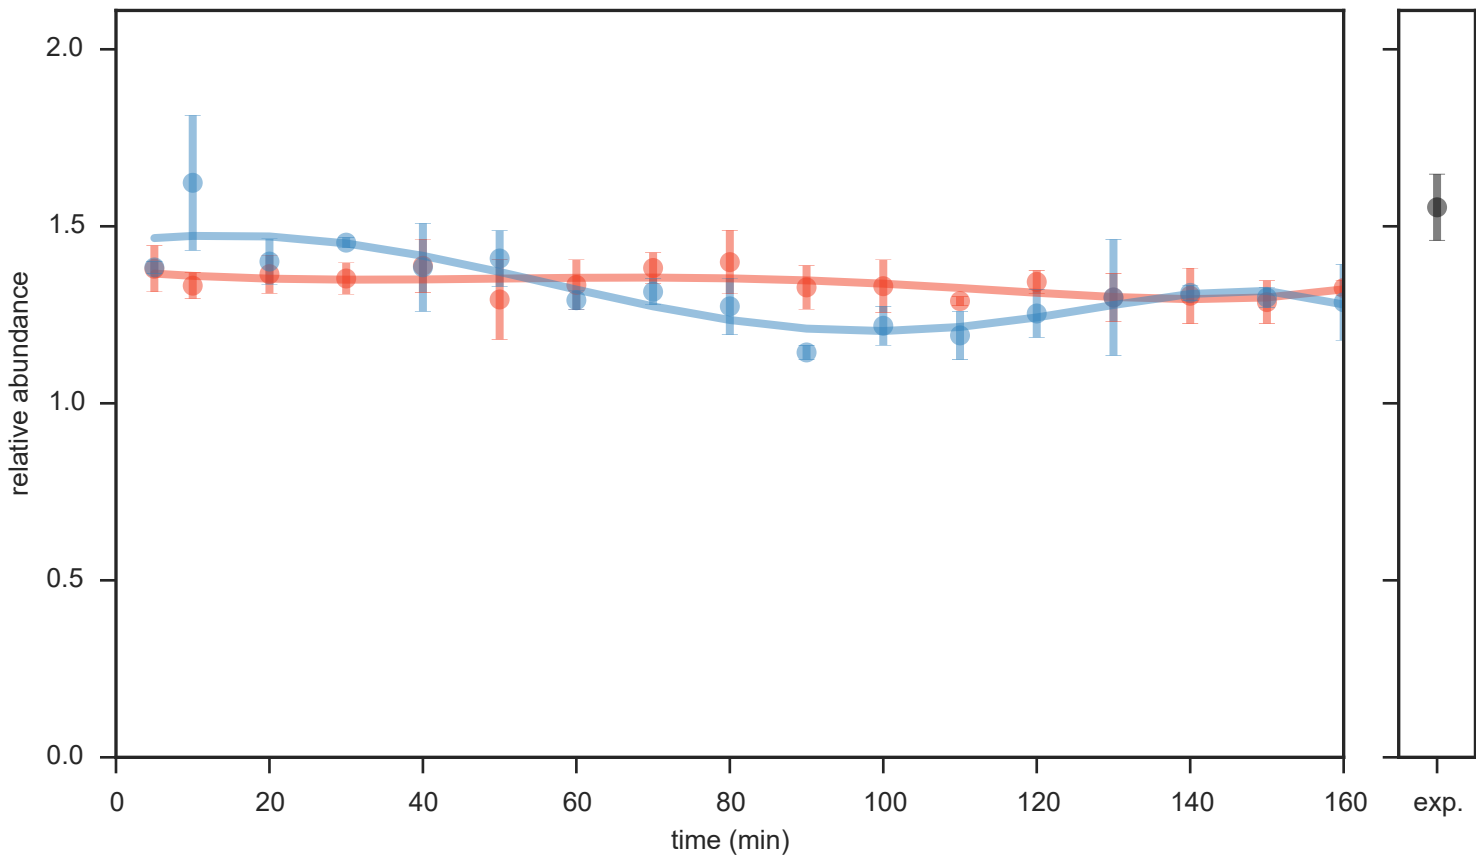

idms\_pid899\_mz227.04

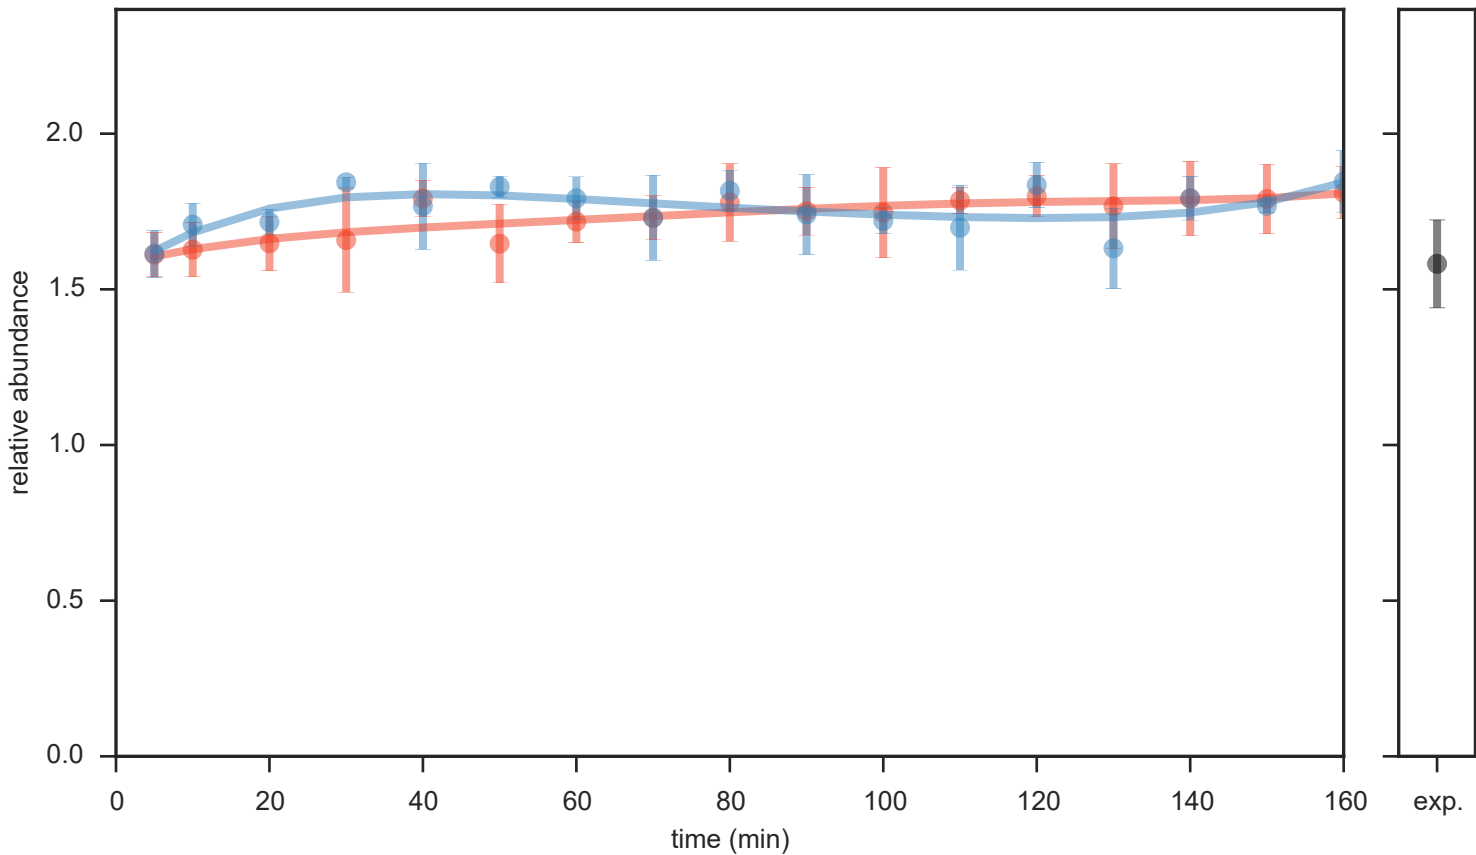

idms\_pid900\_mz403.55

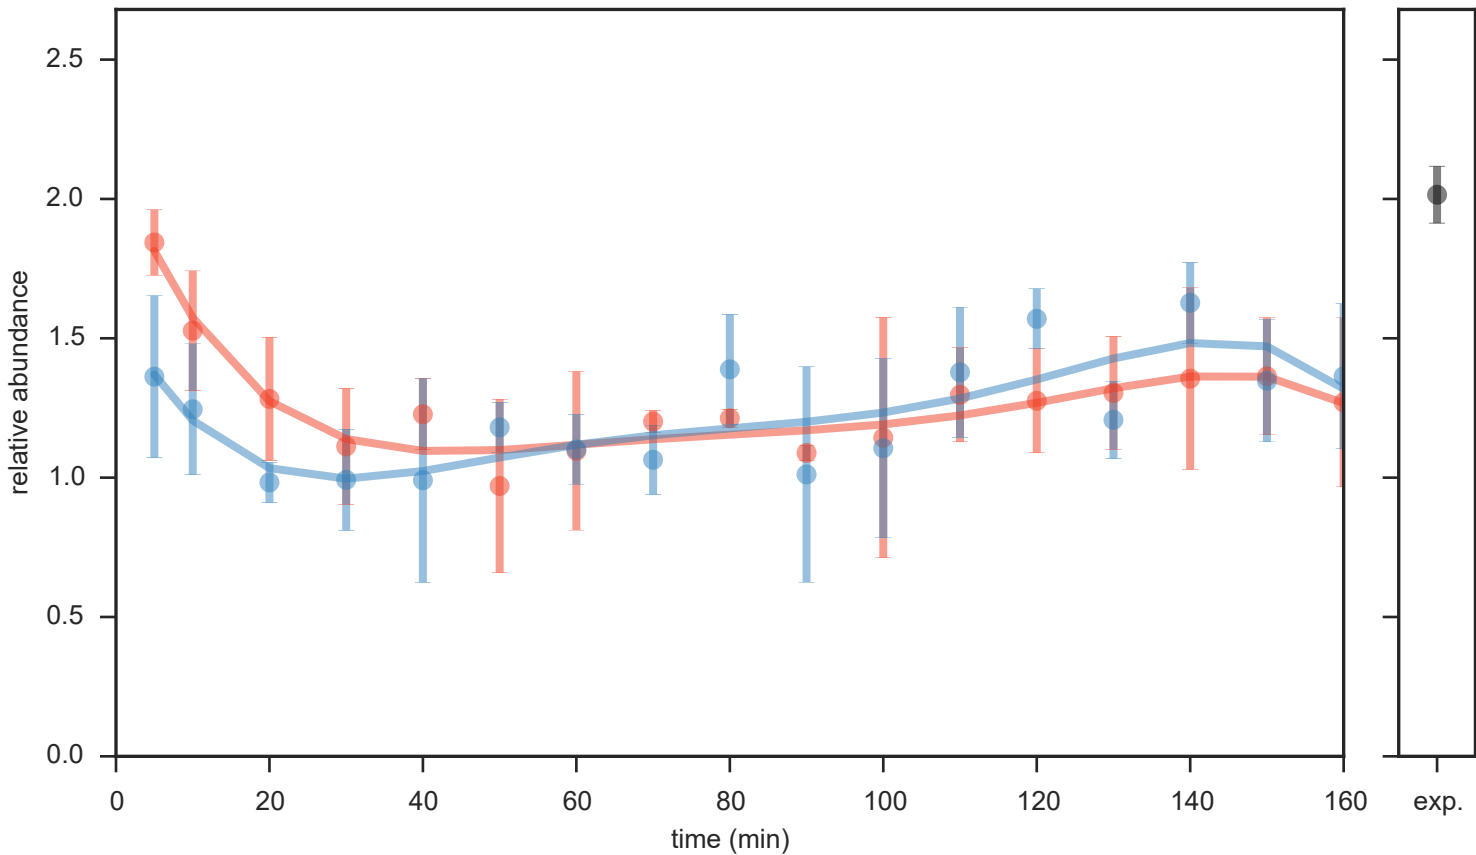

idms\_pid901\_mz380.54

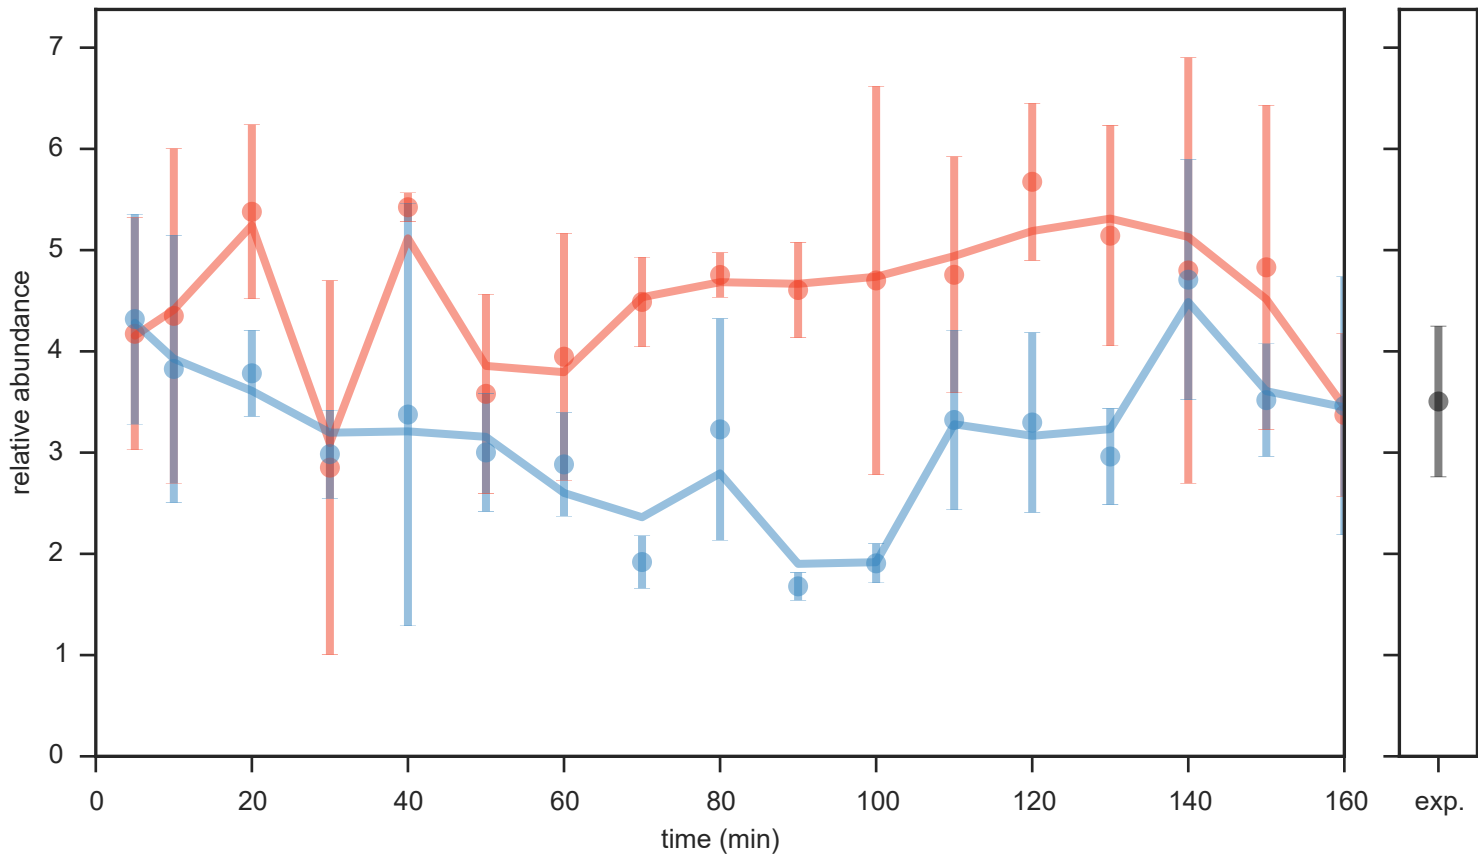

idms\_pid919\_mz356.99

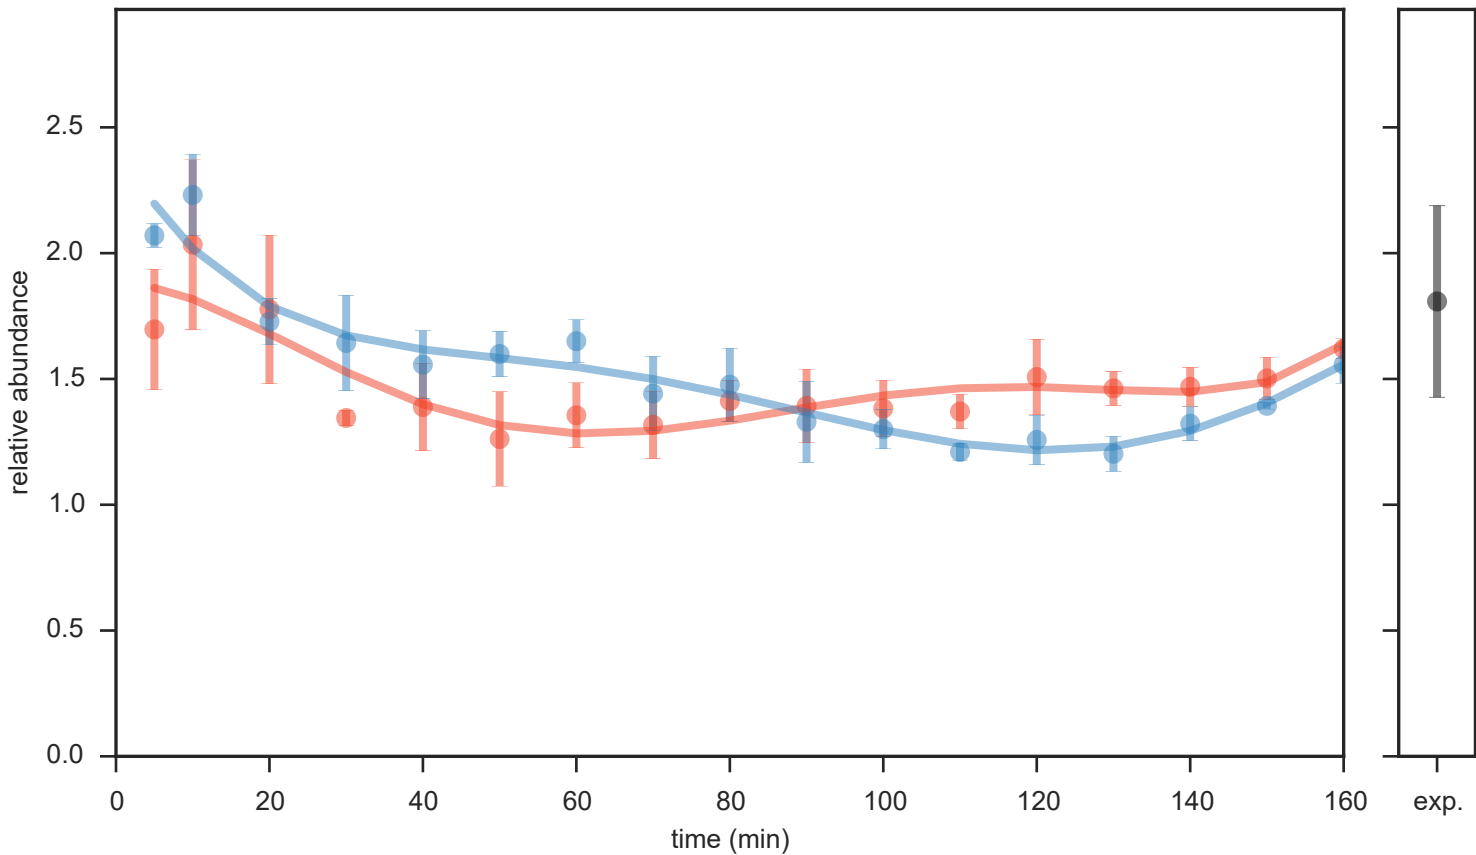

idms\_pid920\_mz285.08

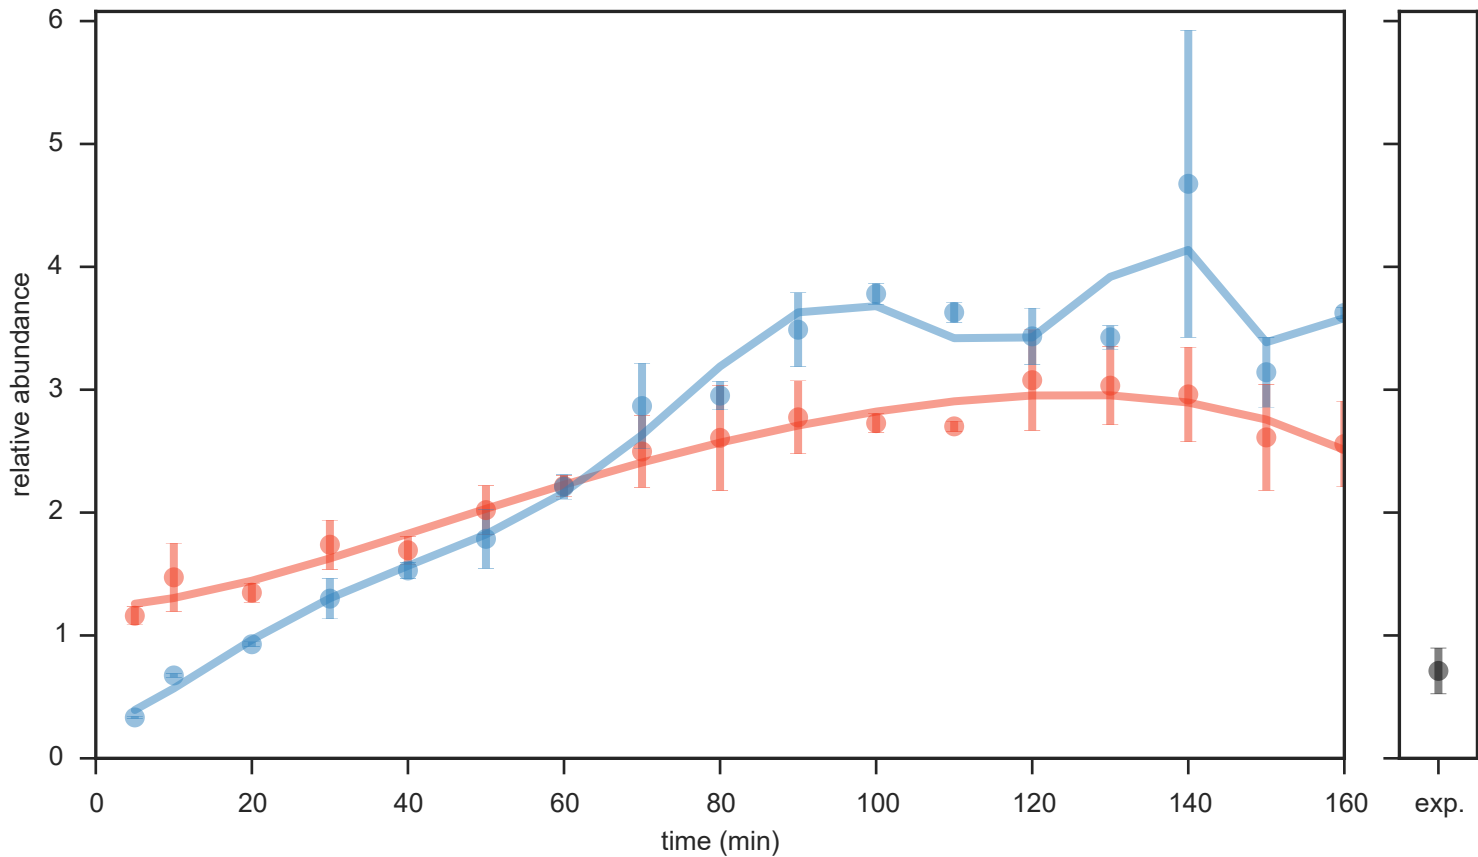



idms\_pid925\_mz319.04

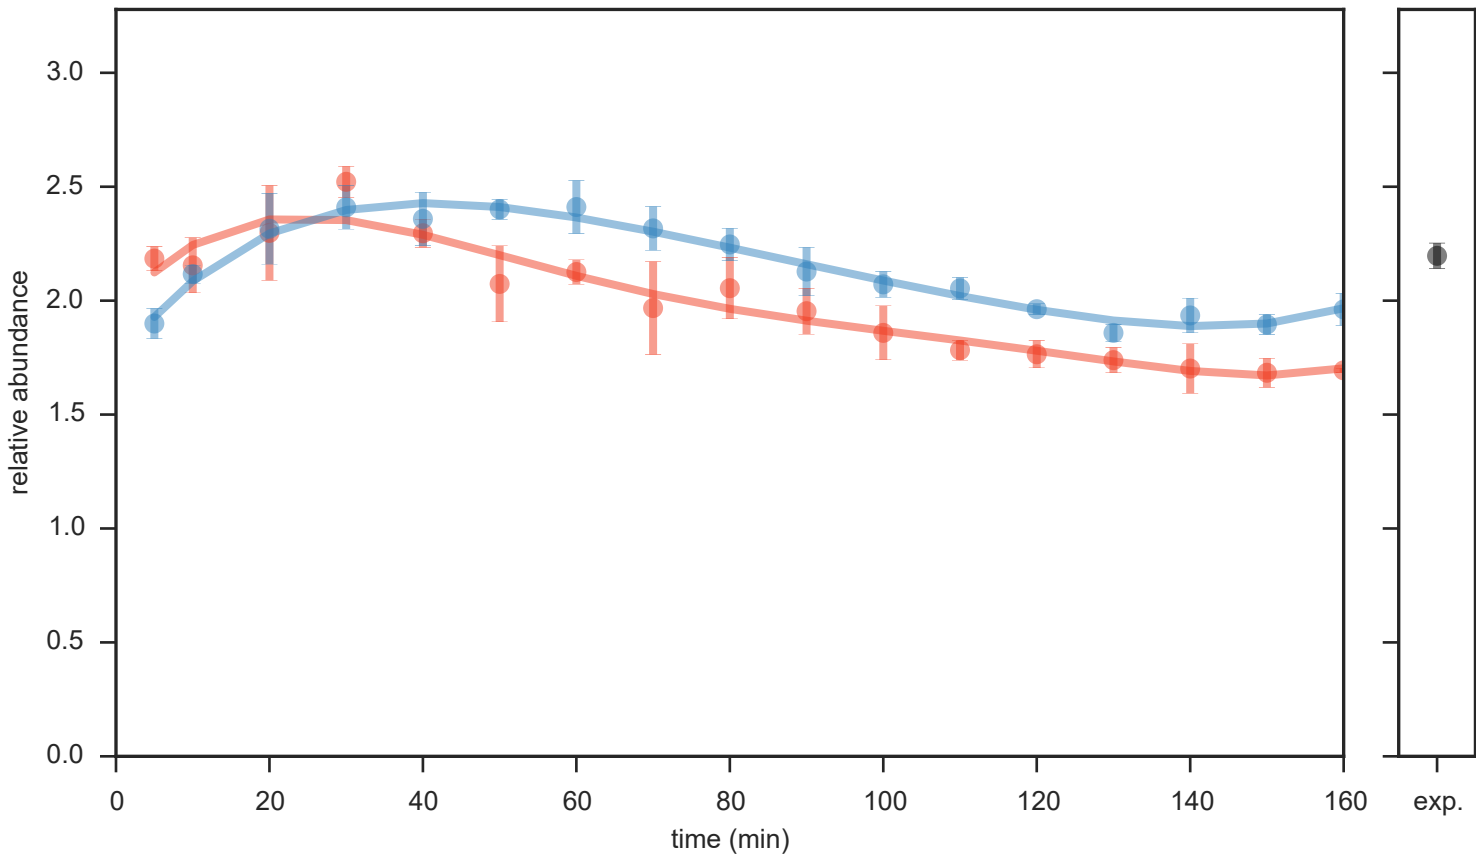

idms\_pid937\_mz402.99

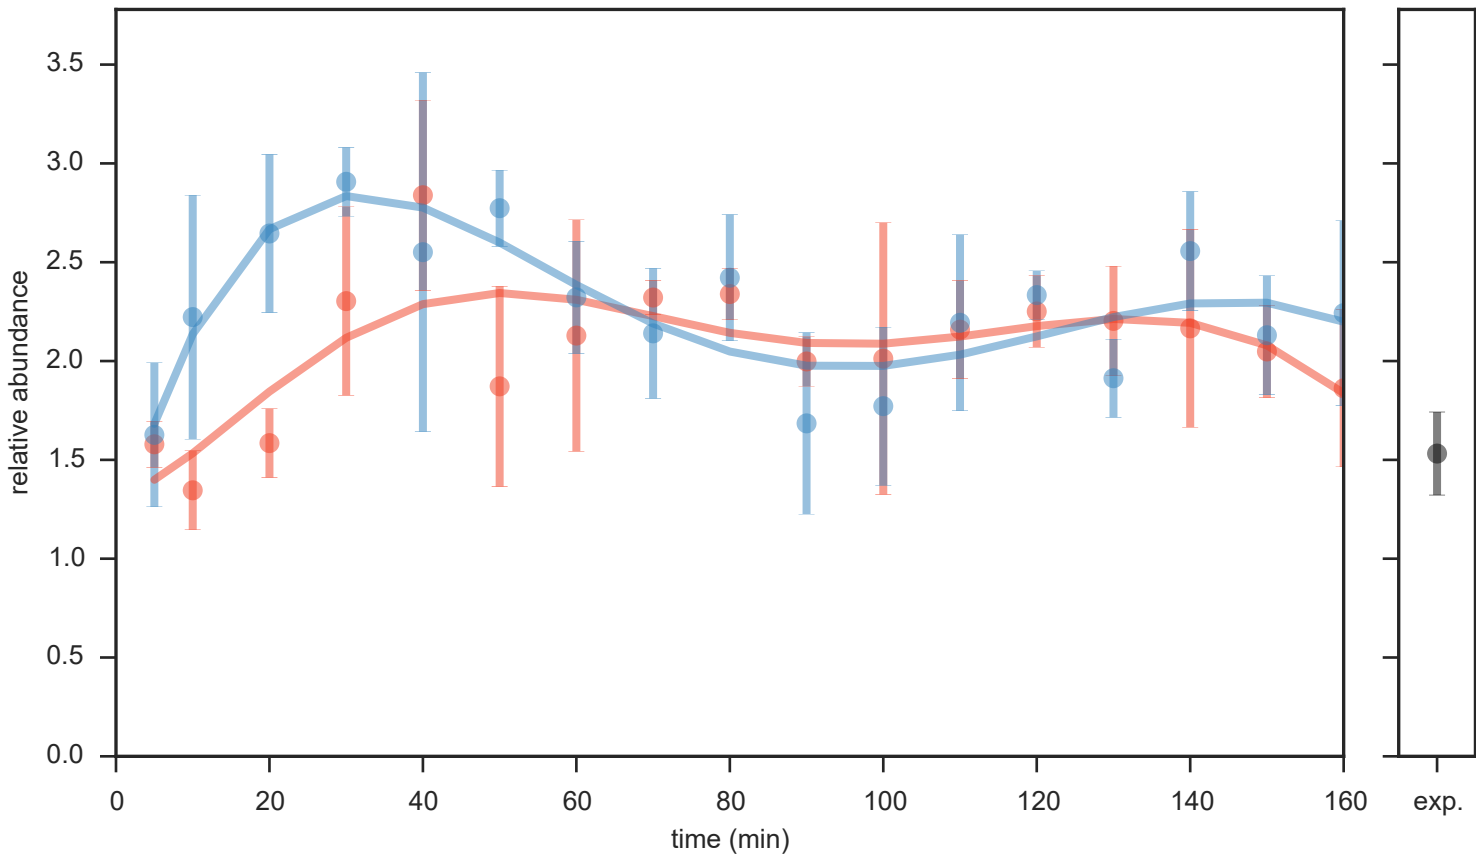

idms\_pid941\_mz310.99

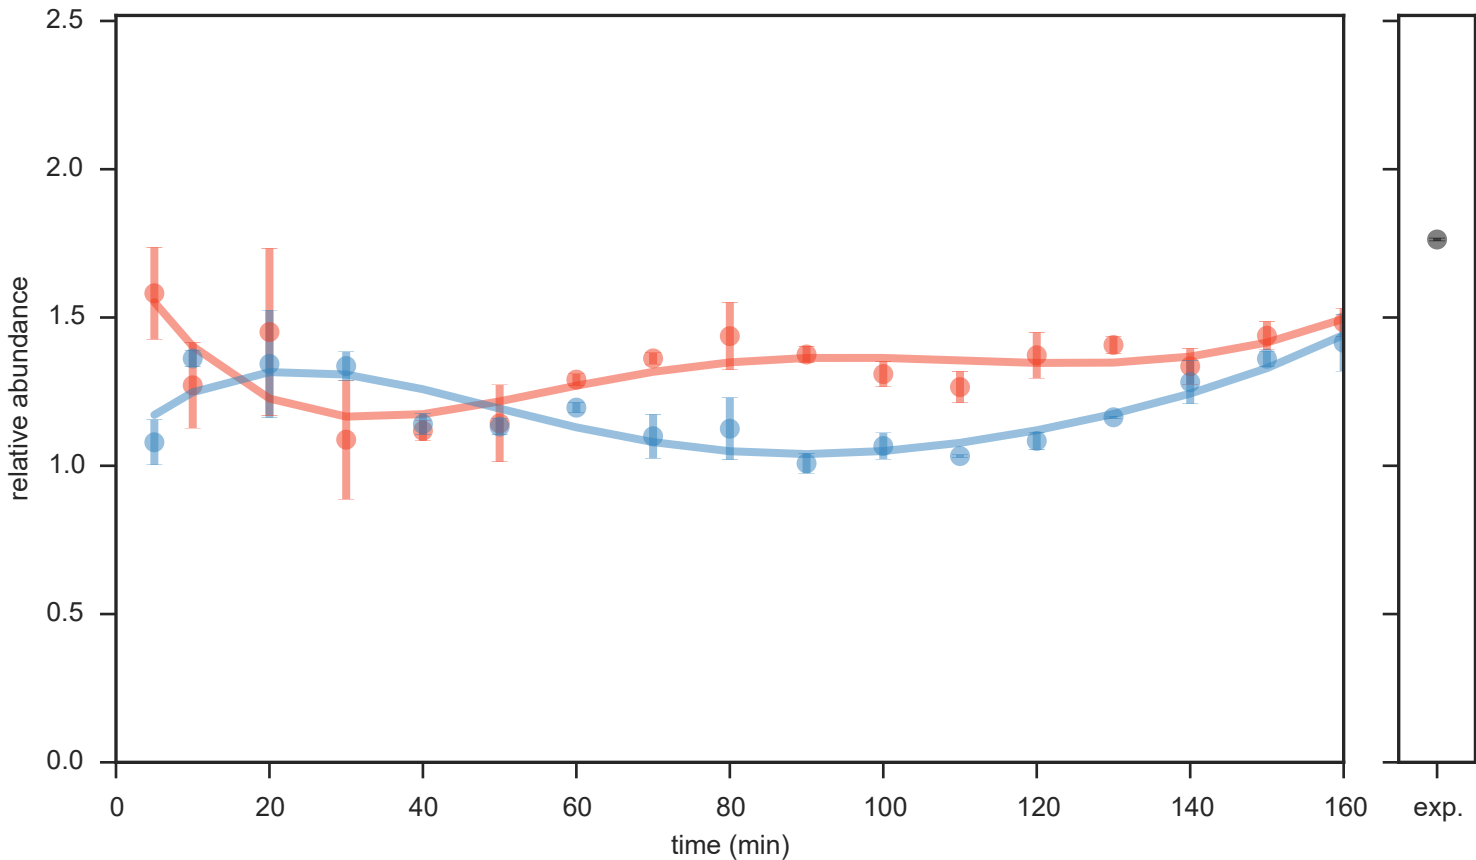

idms\_pid952\_mz297.32

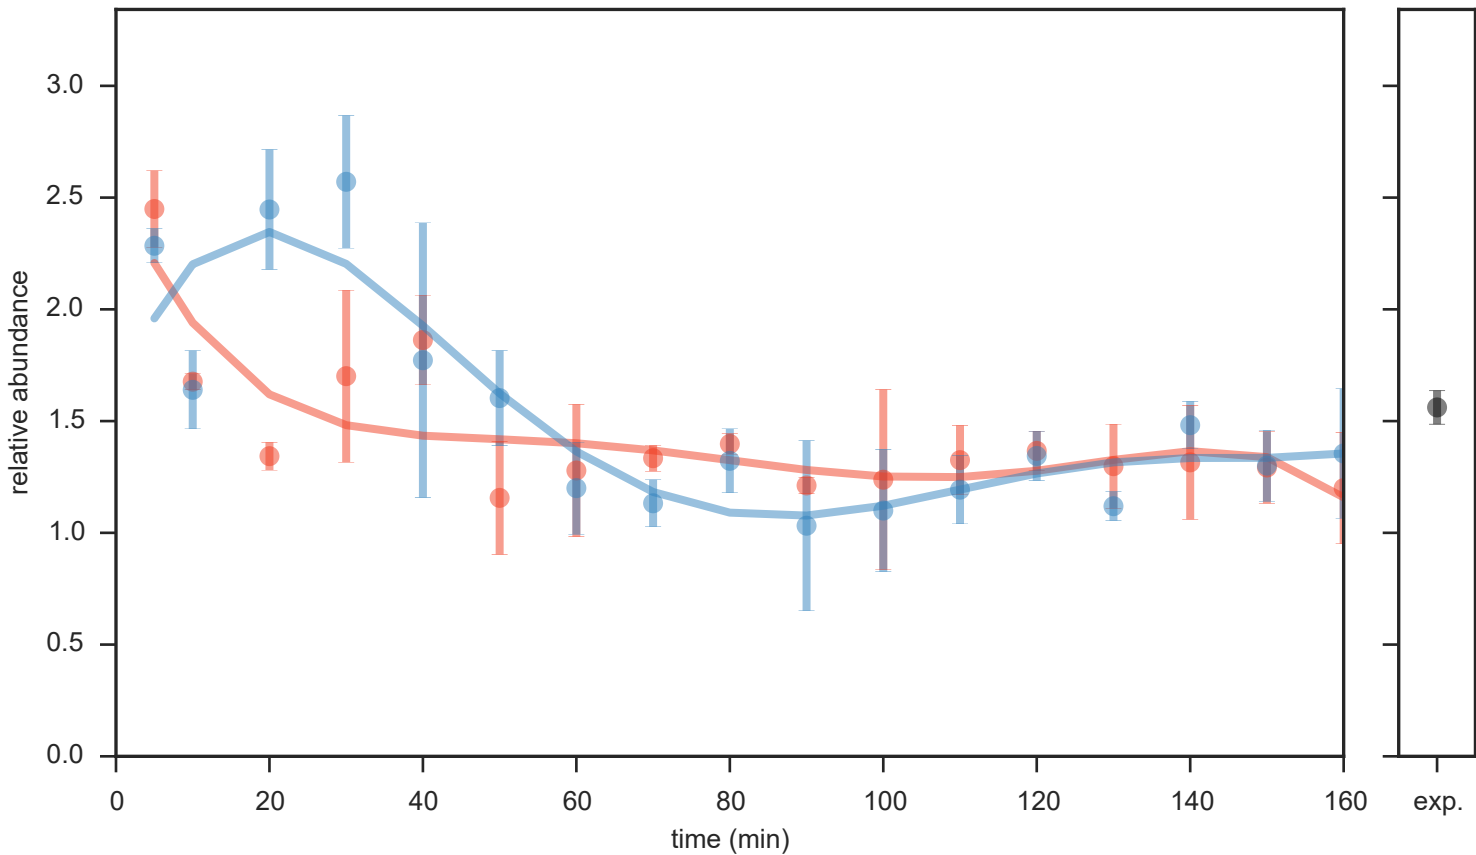

idms\_pid966\_mz417.57

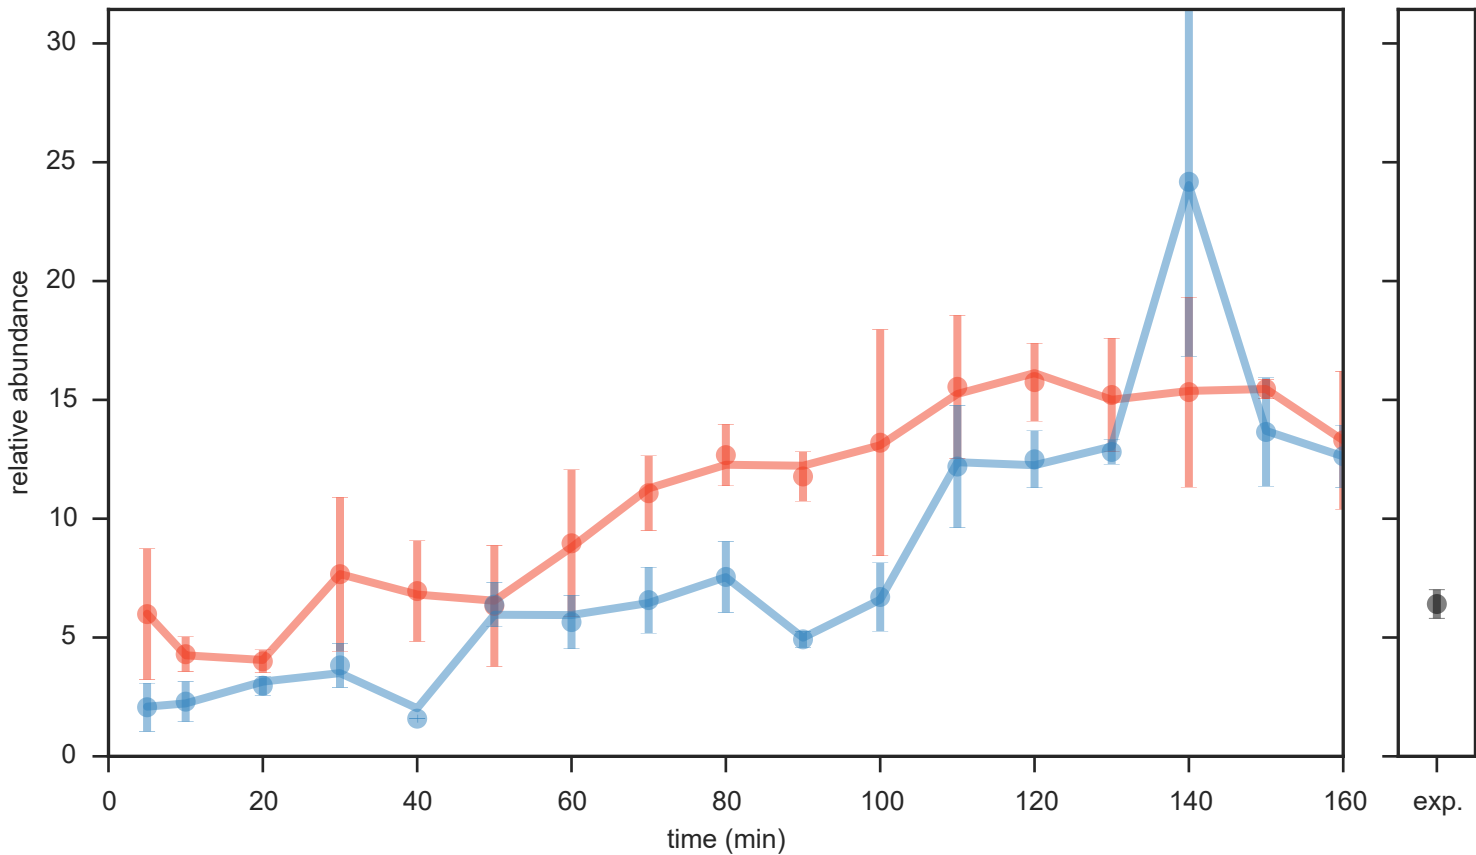

idms\_pid984\_mz328.04

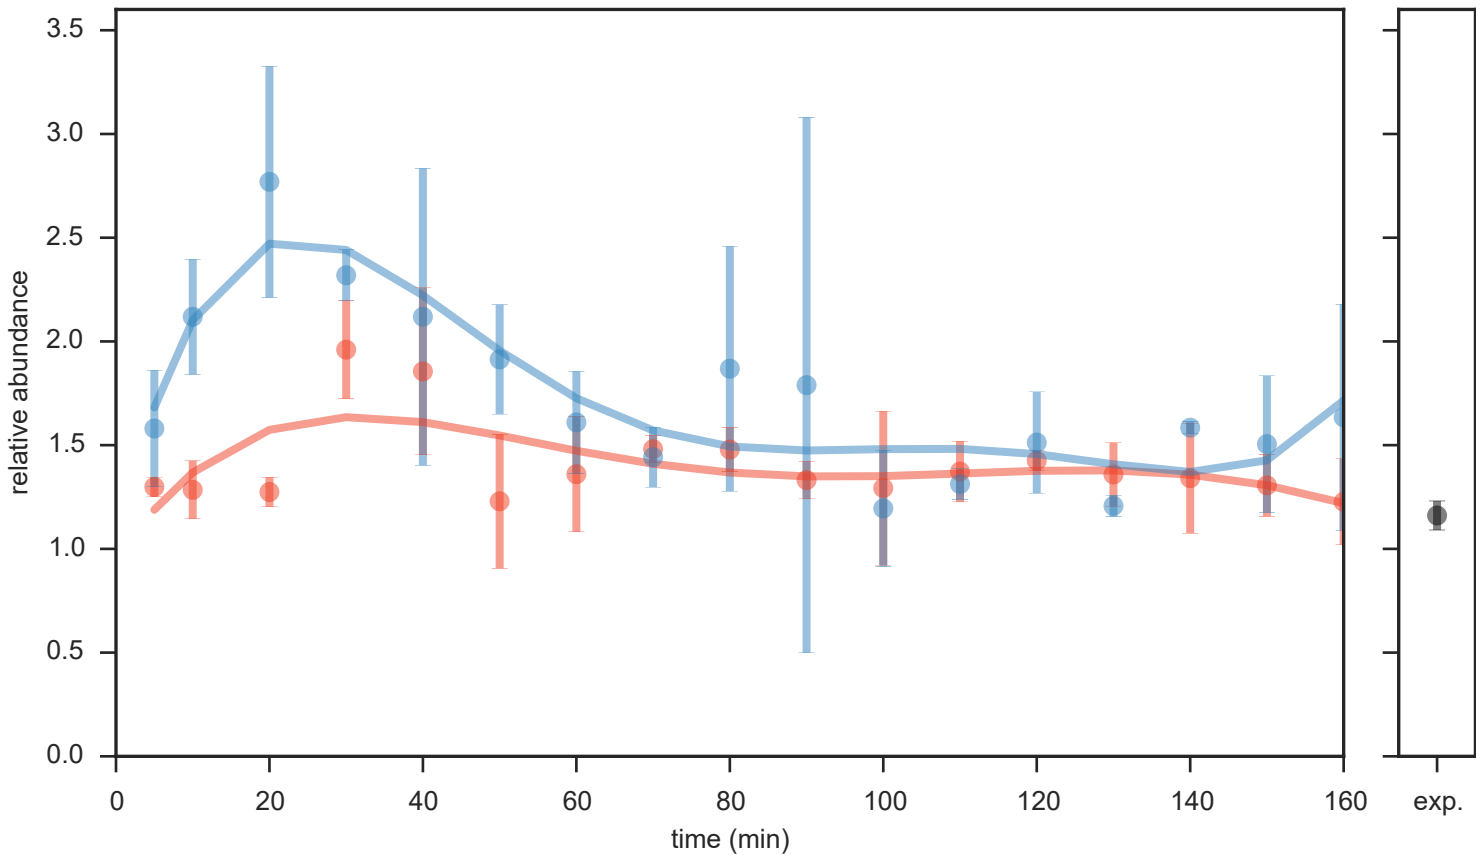

idms\_pid985\_mz267.01

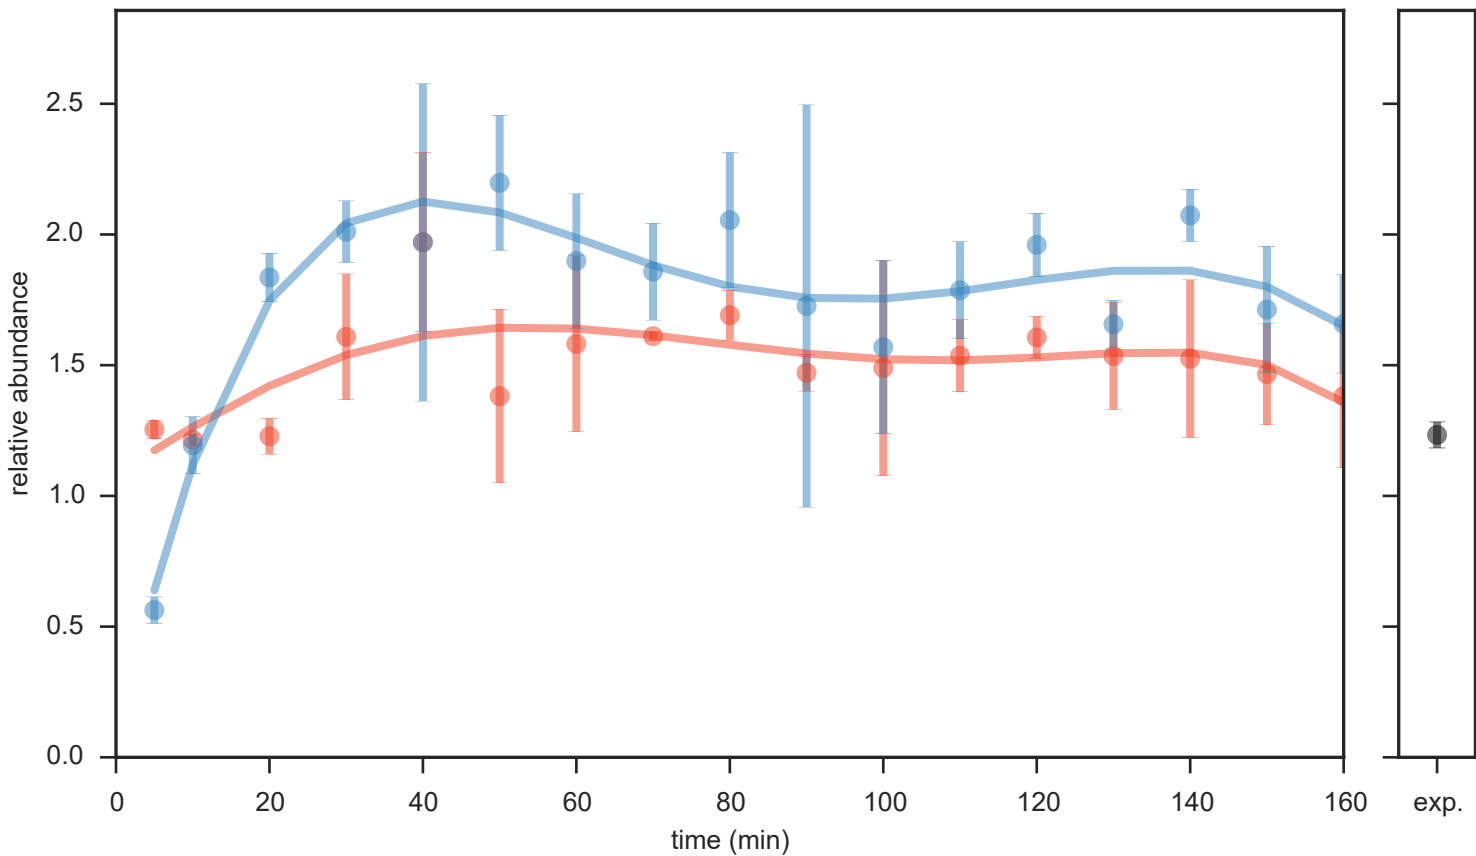

idms\_pid1000\_mz300.04

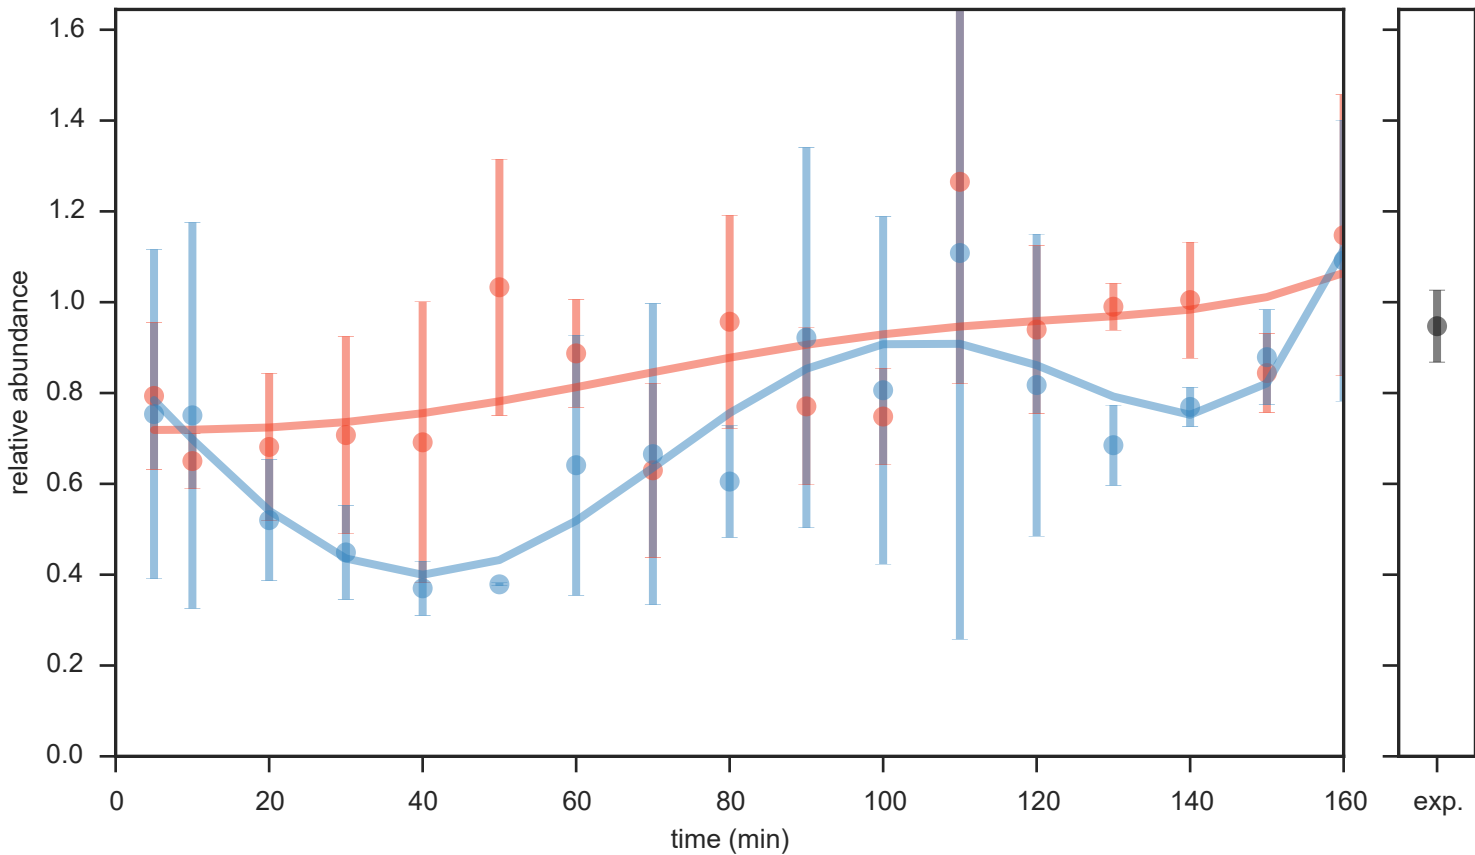



idms\_pid1009\_mz288.07

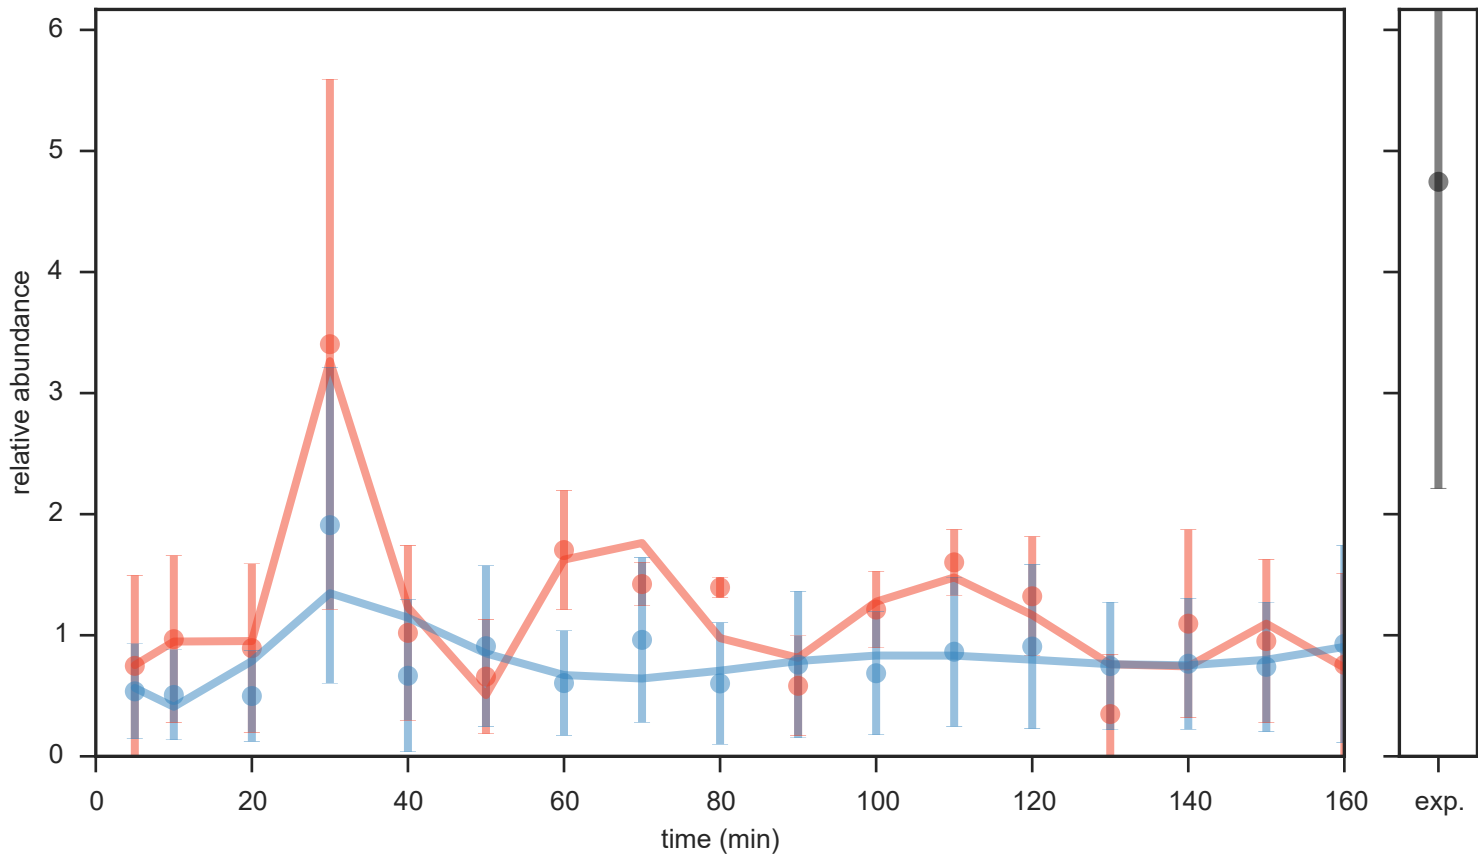

idms\_pid1016\_mz272.02

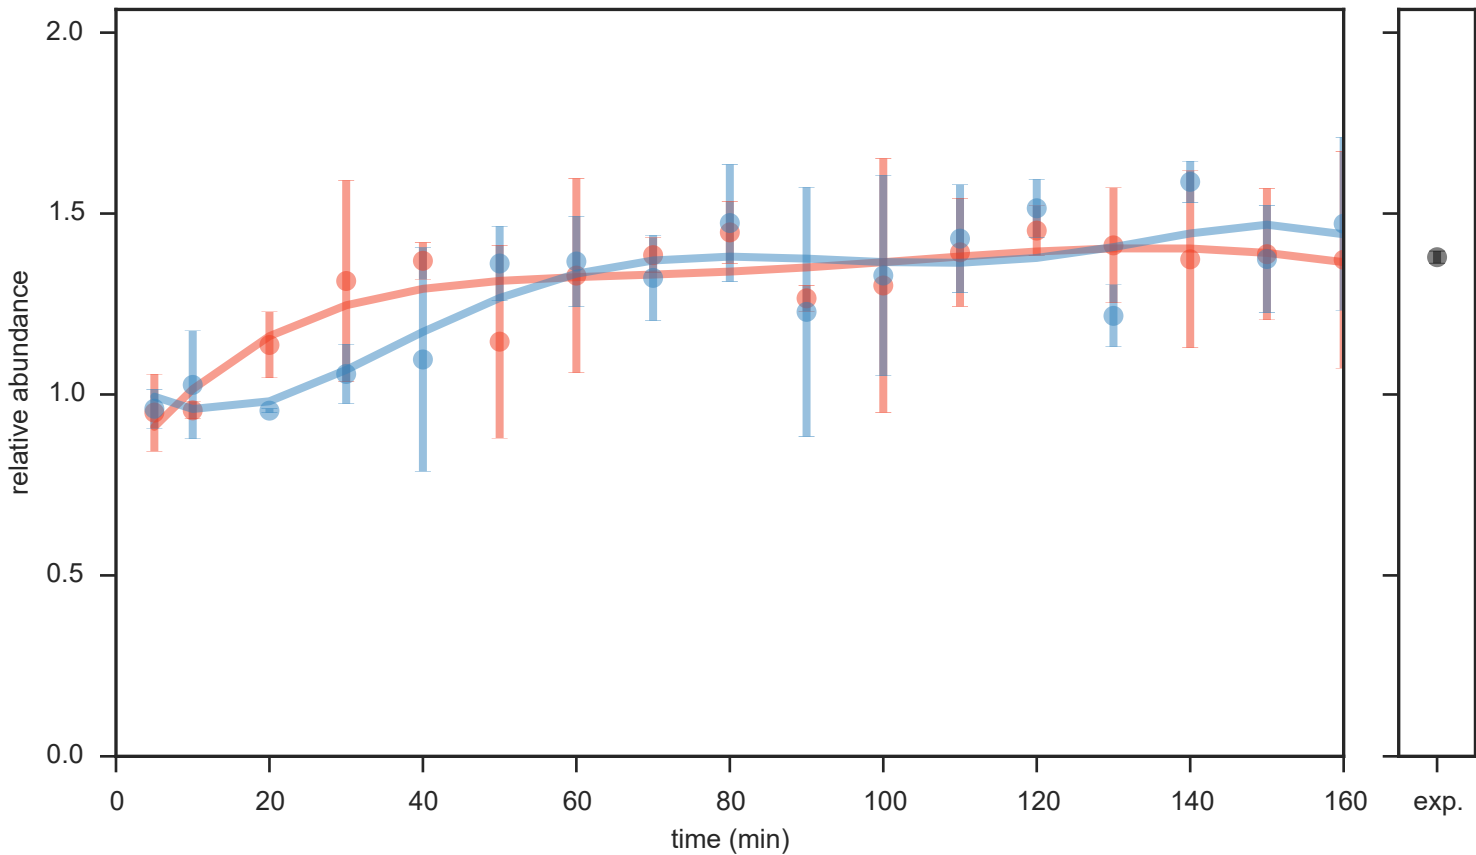

idms\_pid1017\_mz292.52

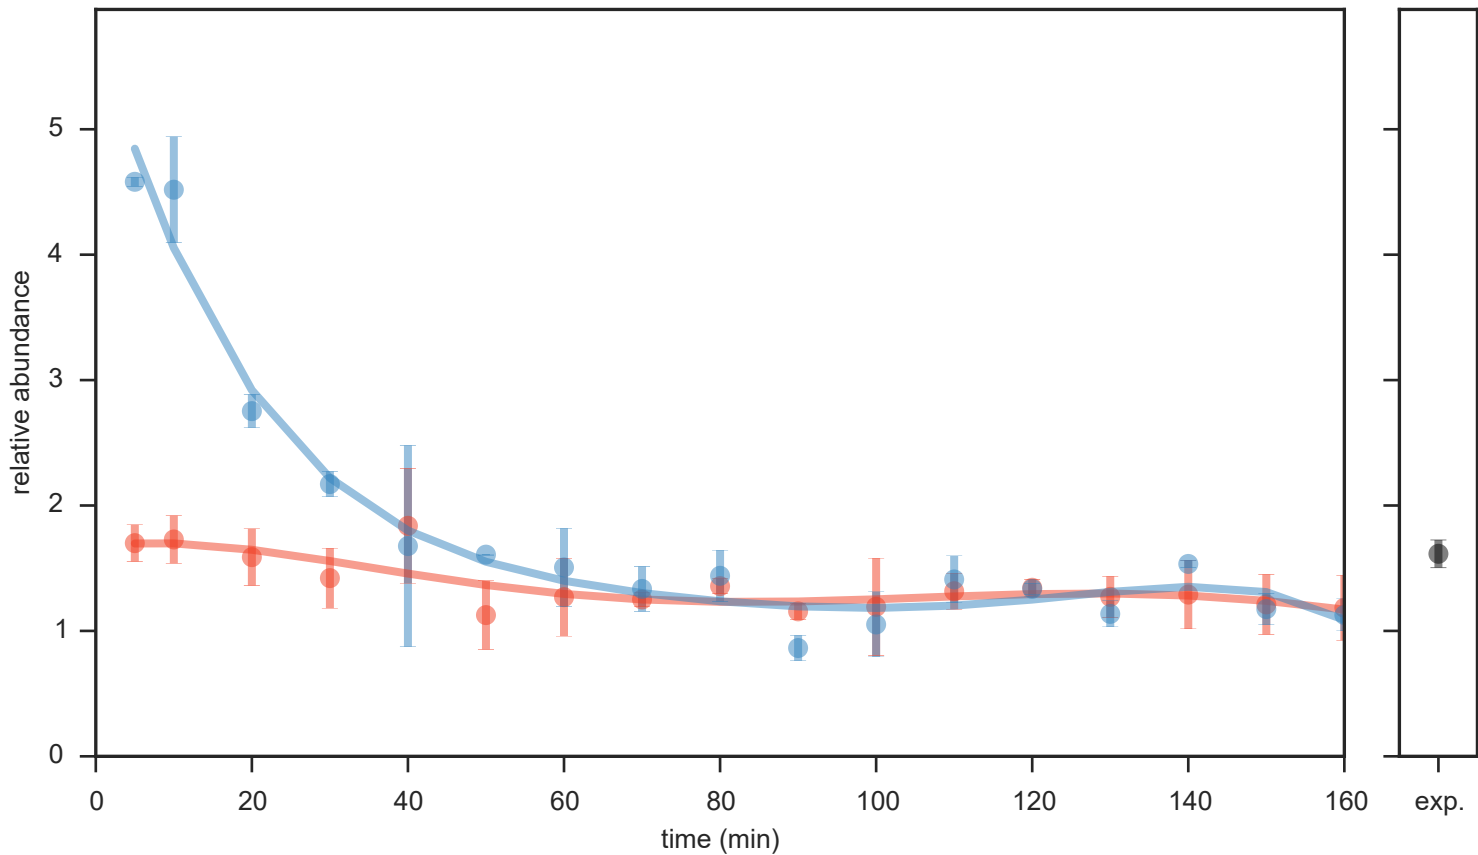

idms\_pid1027\_mz176.51

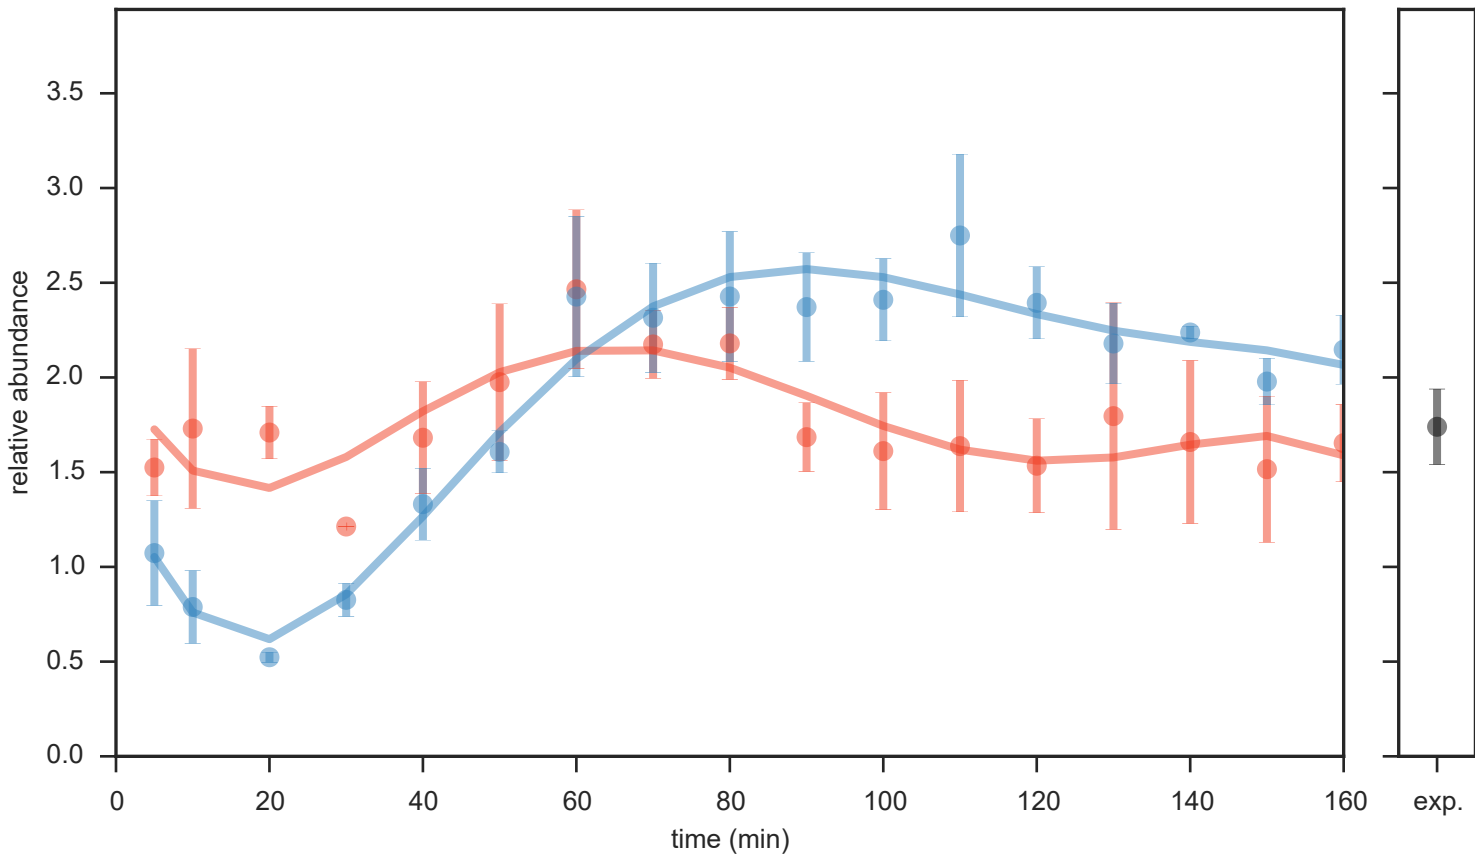

idms\_pid1031\_mz320.07

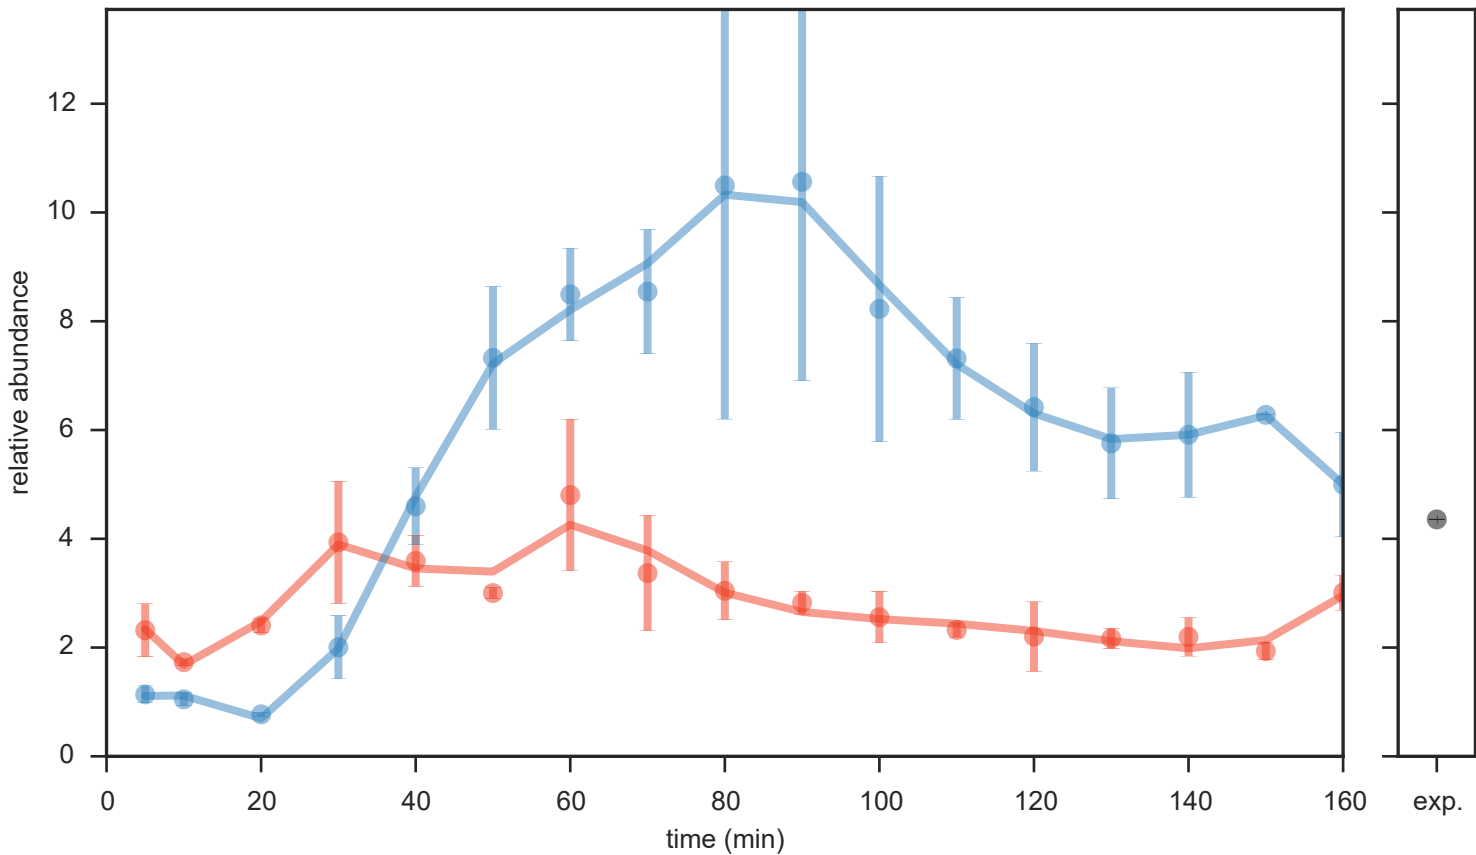

idms\_pid1044\_mz284.05

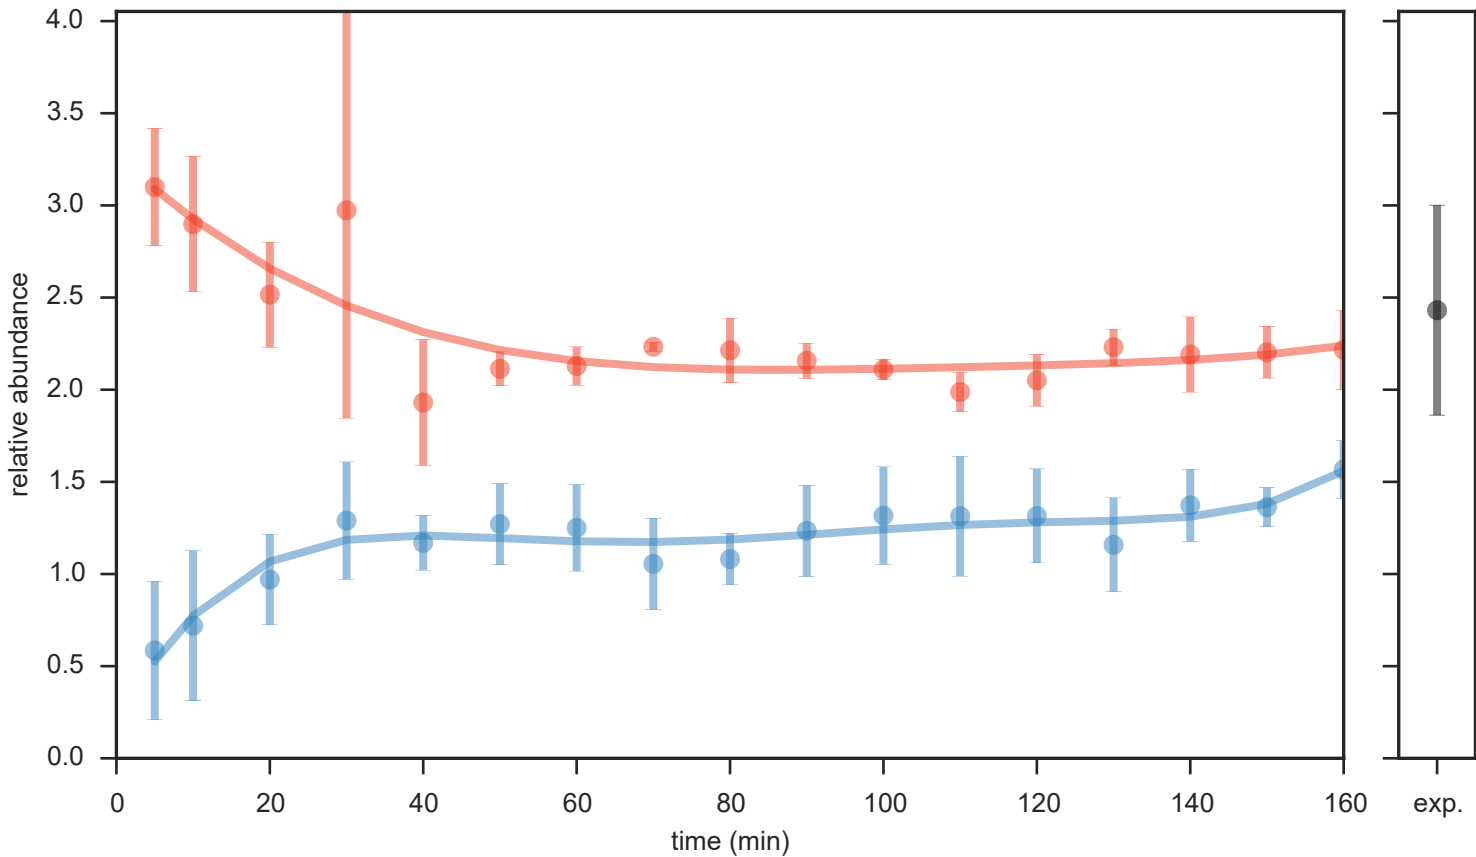

idms\_pid1045\_mz147.06

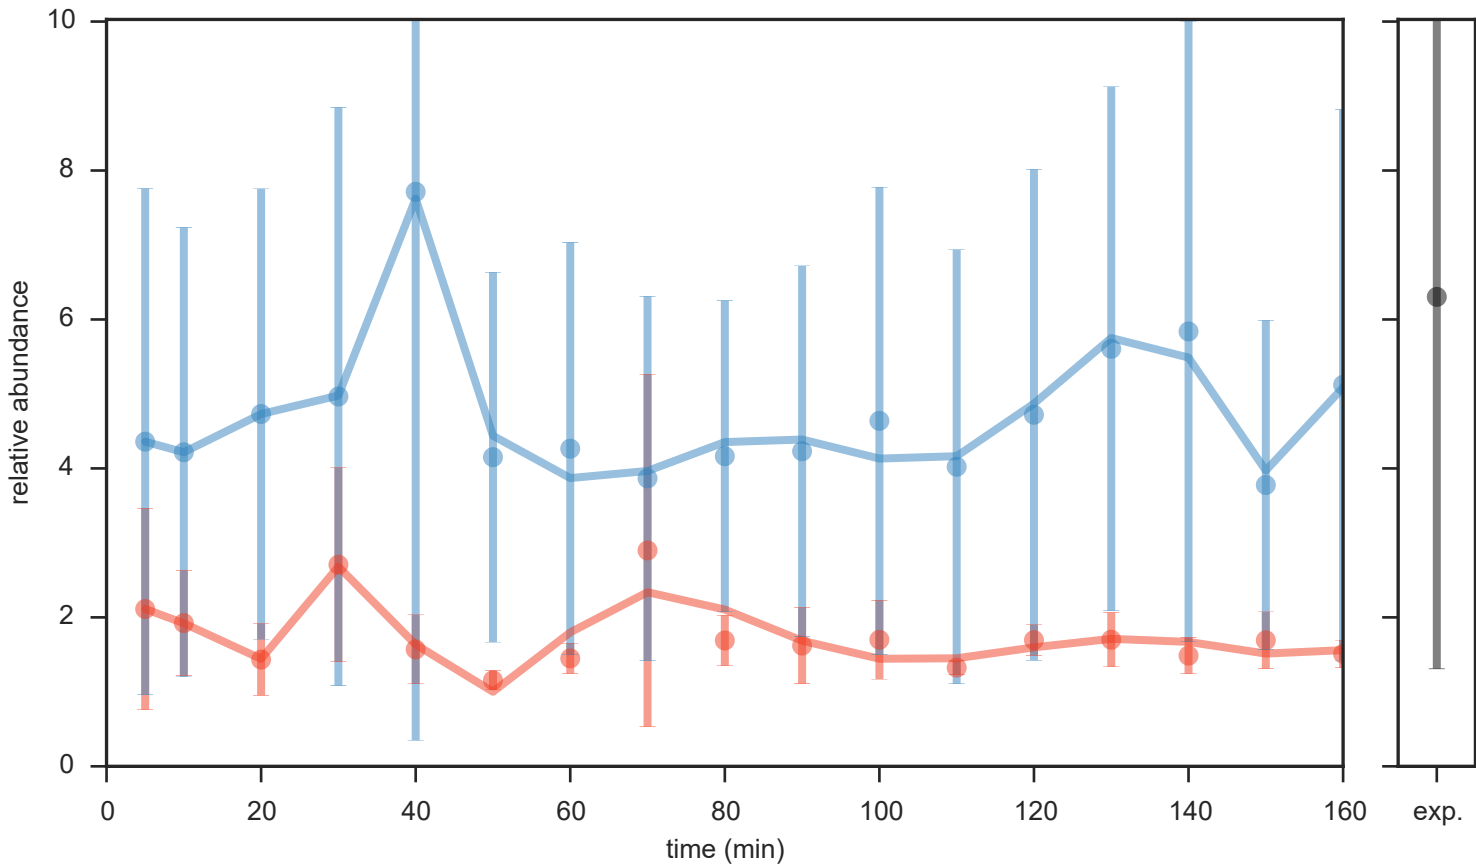

idms\_pid1058\_mz383.11

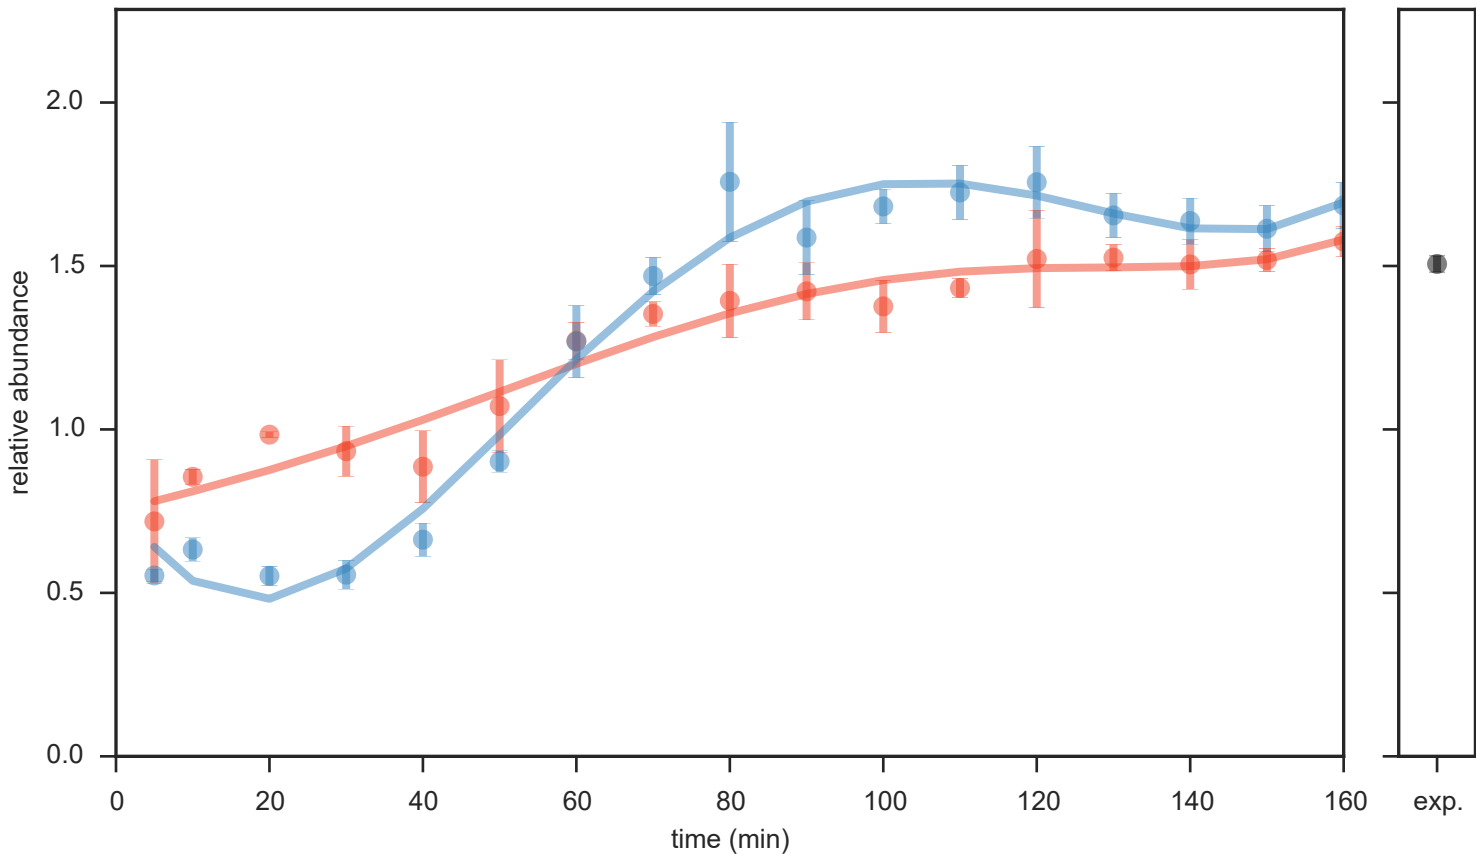



idms\_pid1099\_mz323.02

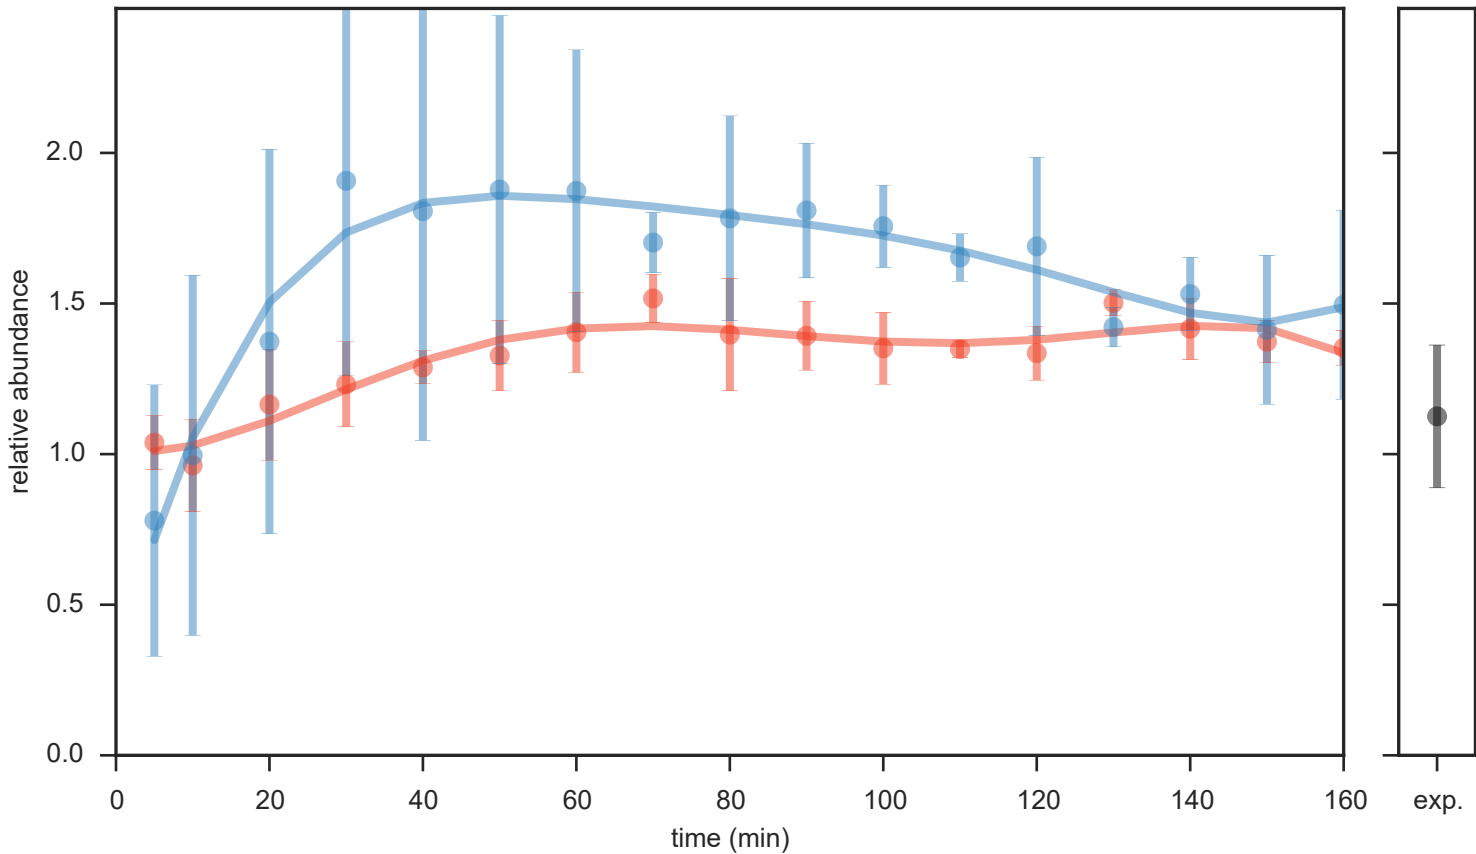

idms\_pid1123\_mz370.57

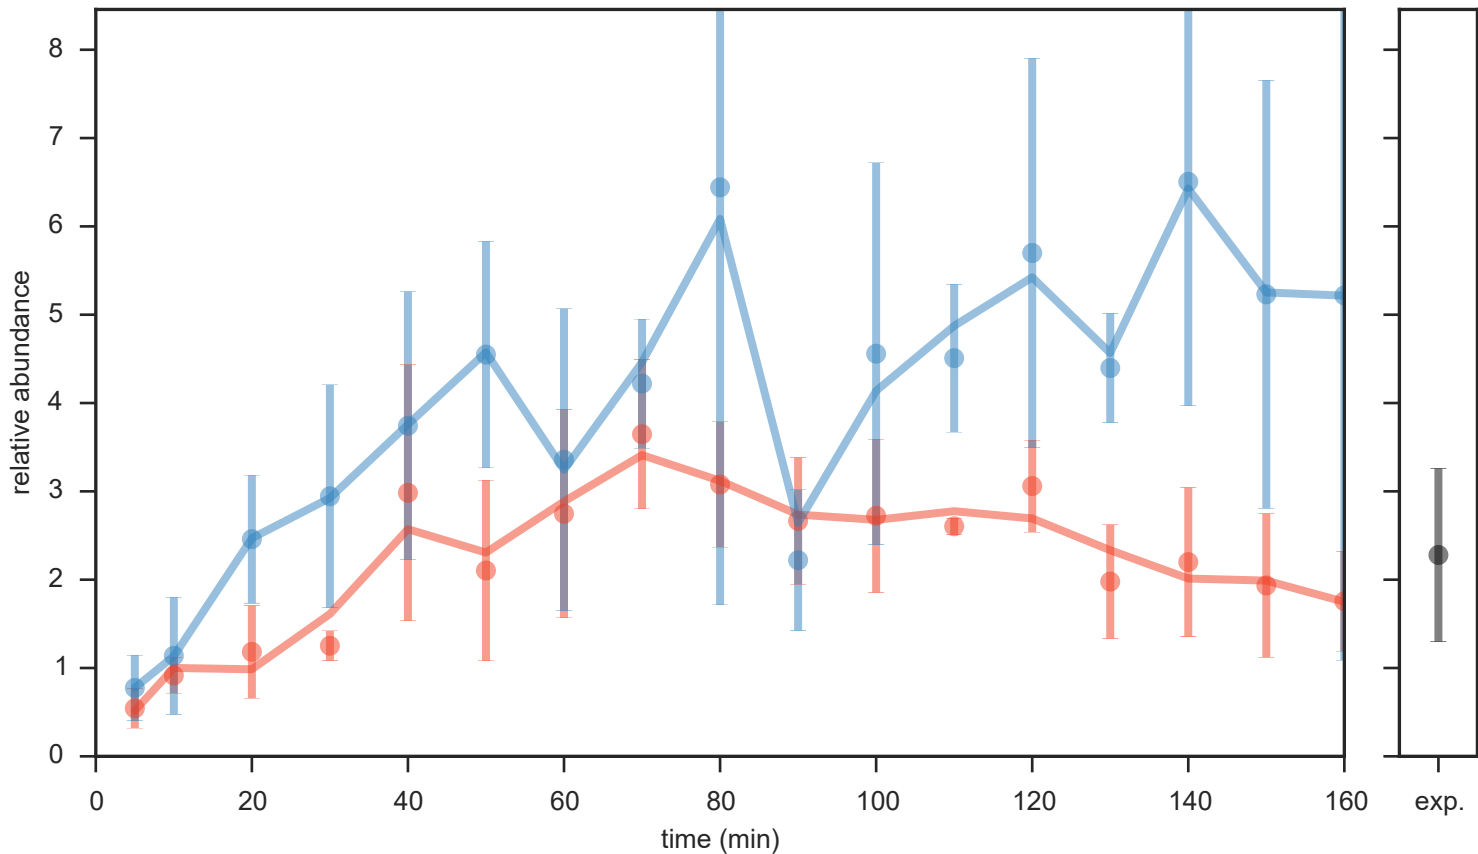

idms\_pid1135\_mz173.71

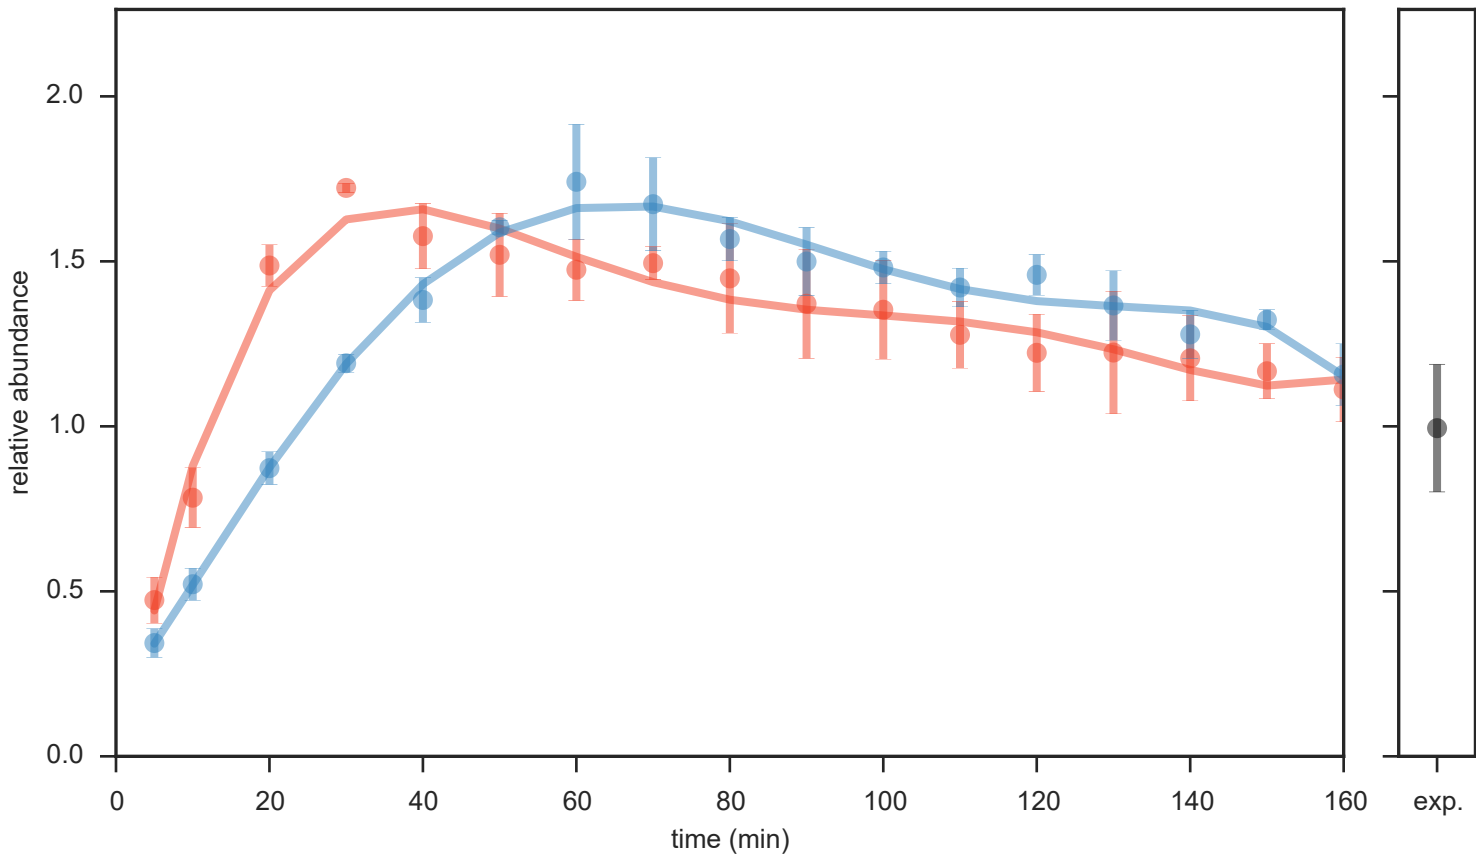

idms\_pid1137\_mz198.01

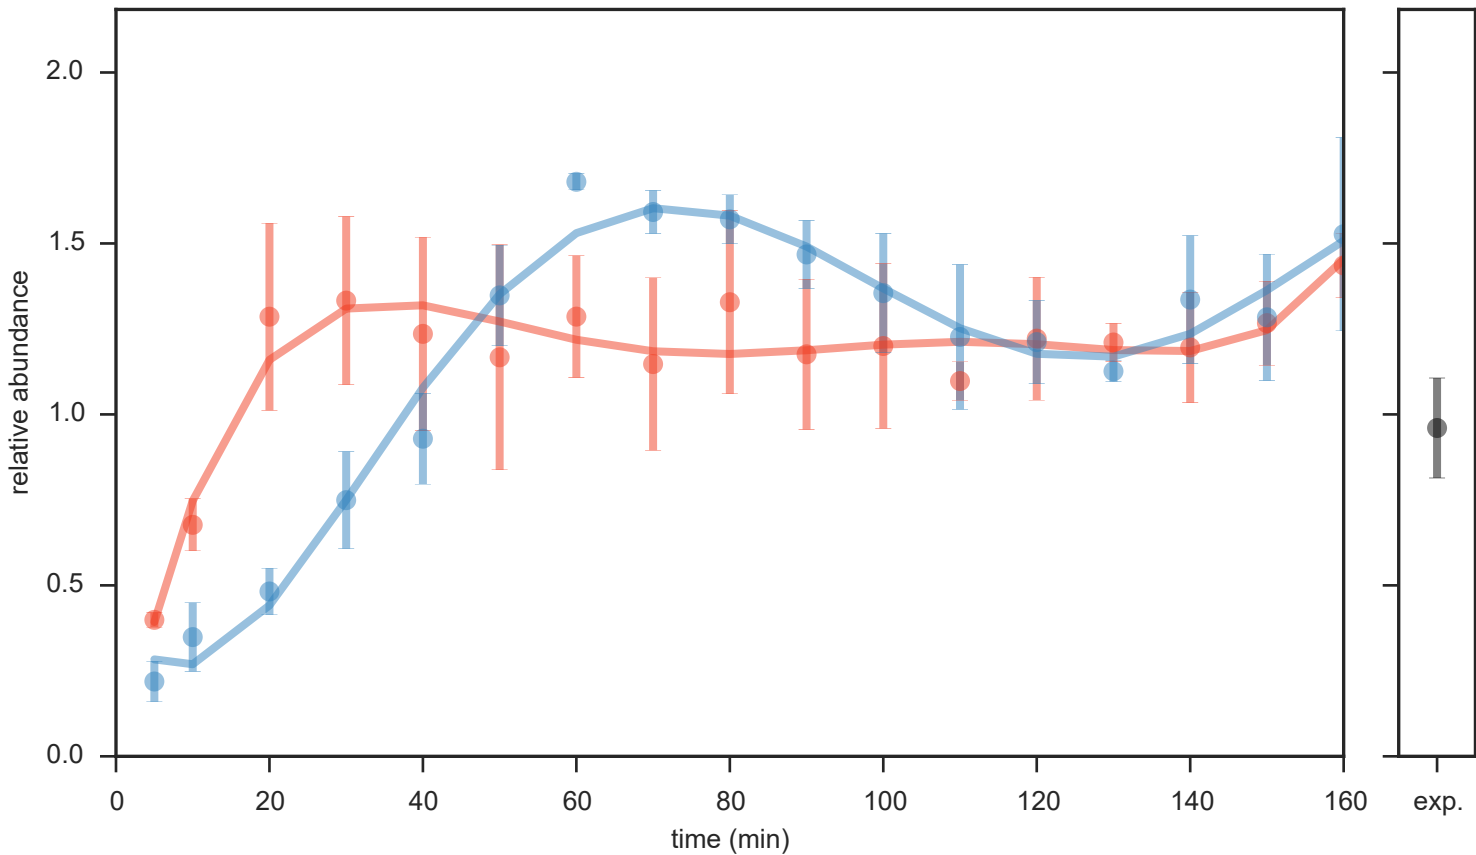

idms\_pid1143\_mz359.43

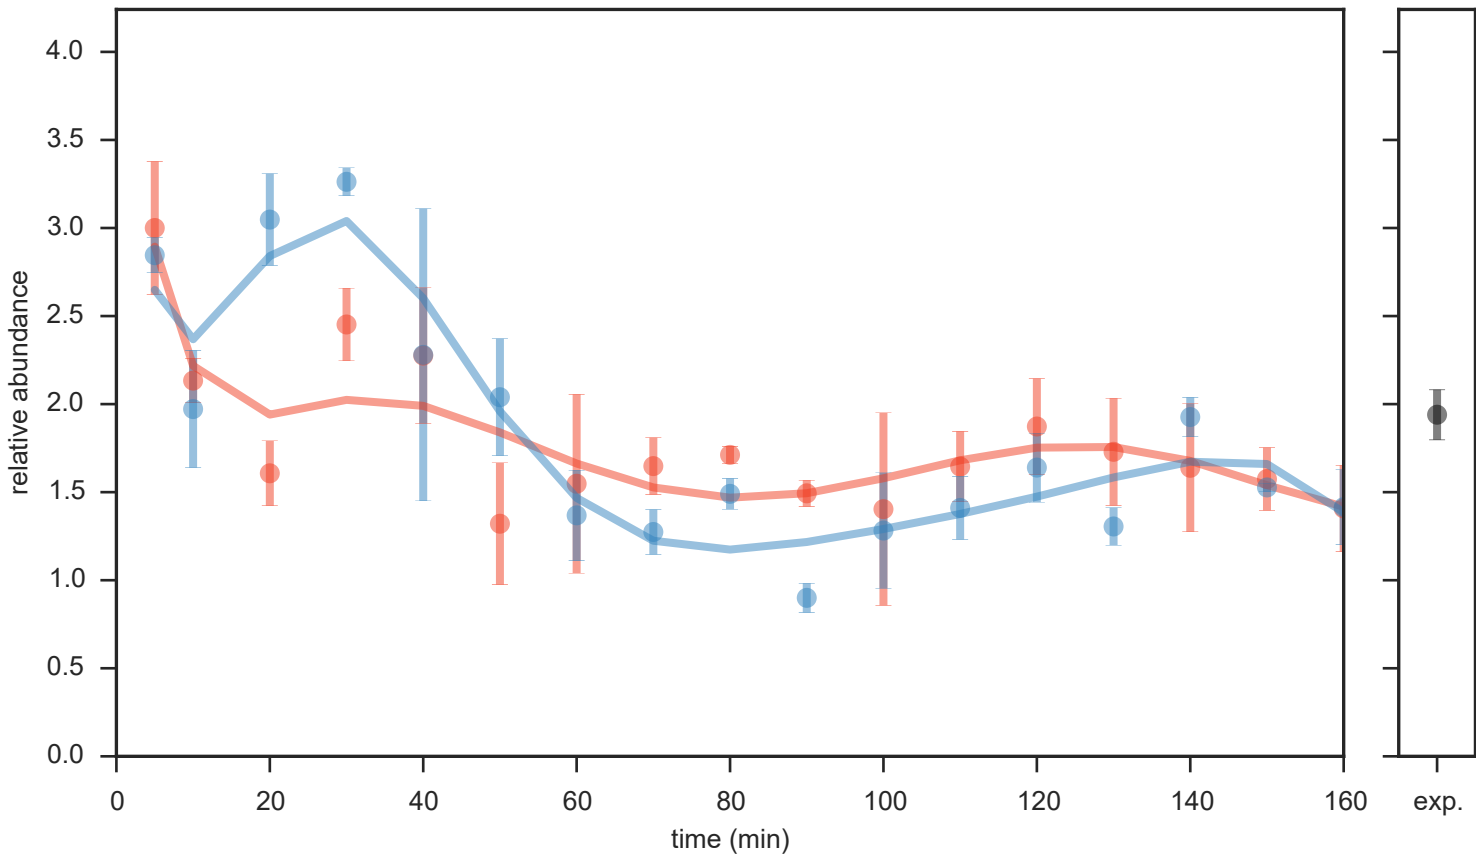

idms\_pid1148\_mz298.51

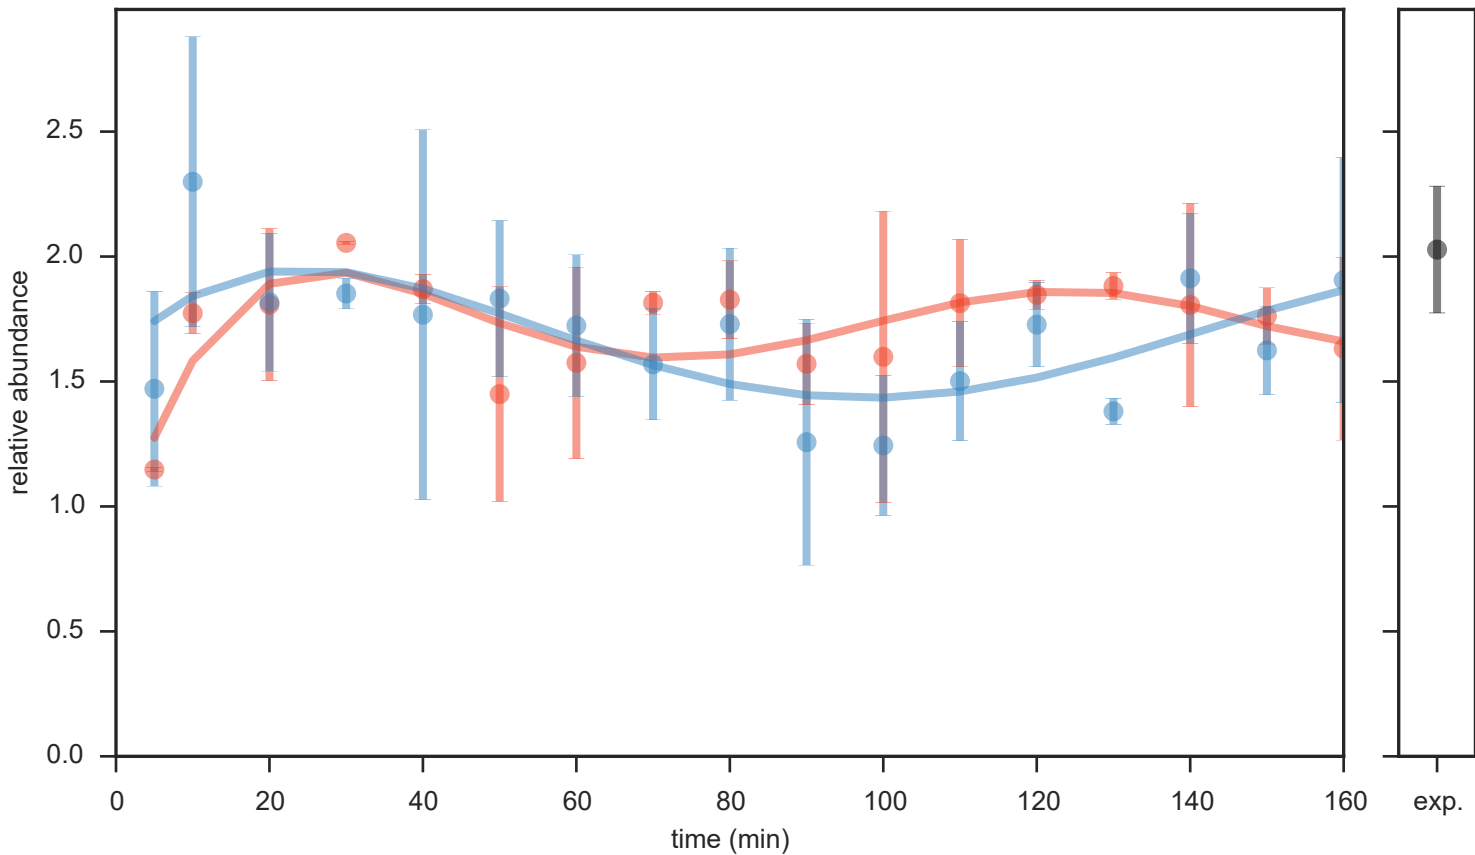

idms\_pid1181\_mz198.99

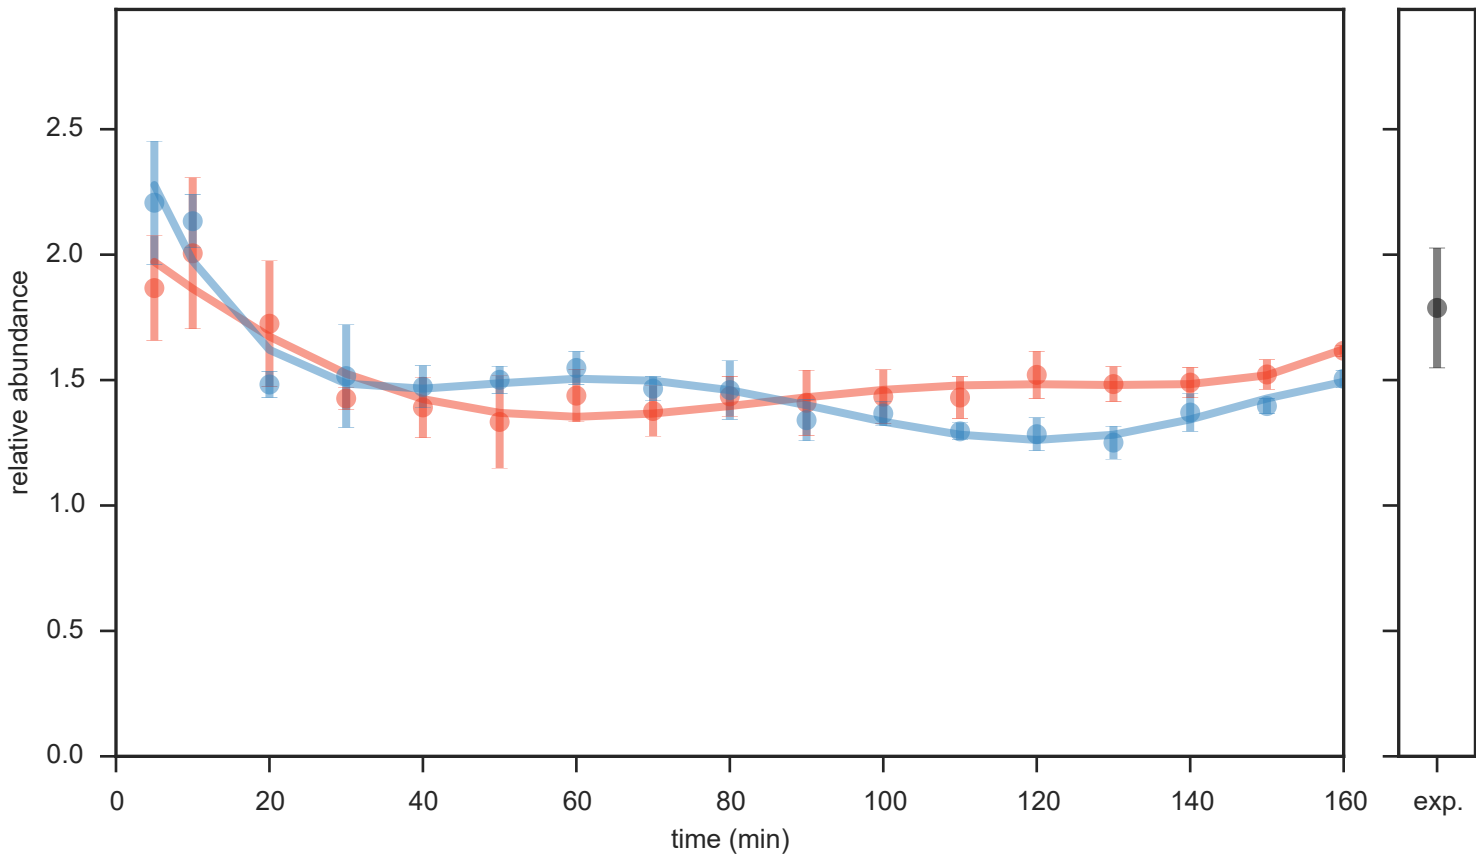

idms\_pid1184\_mz352.96

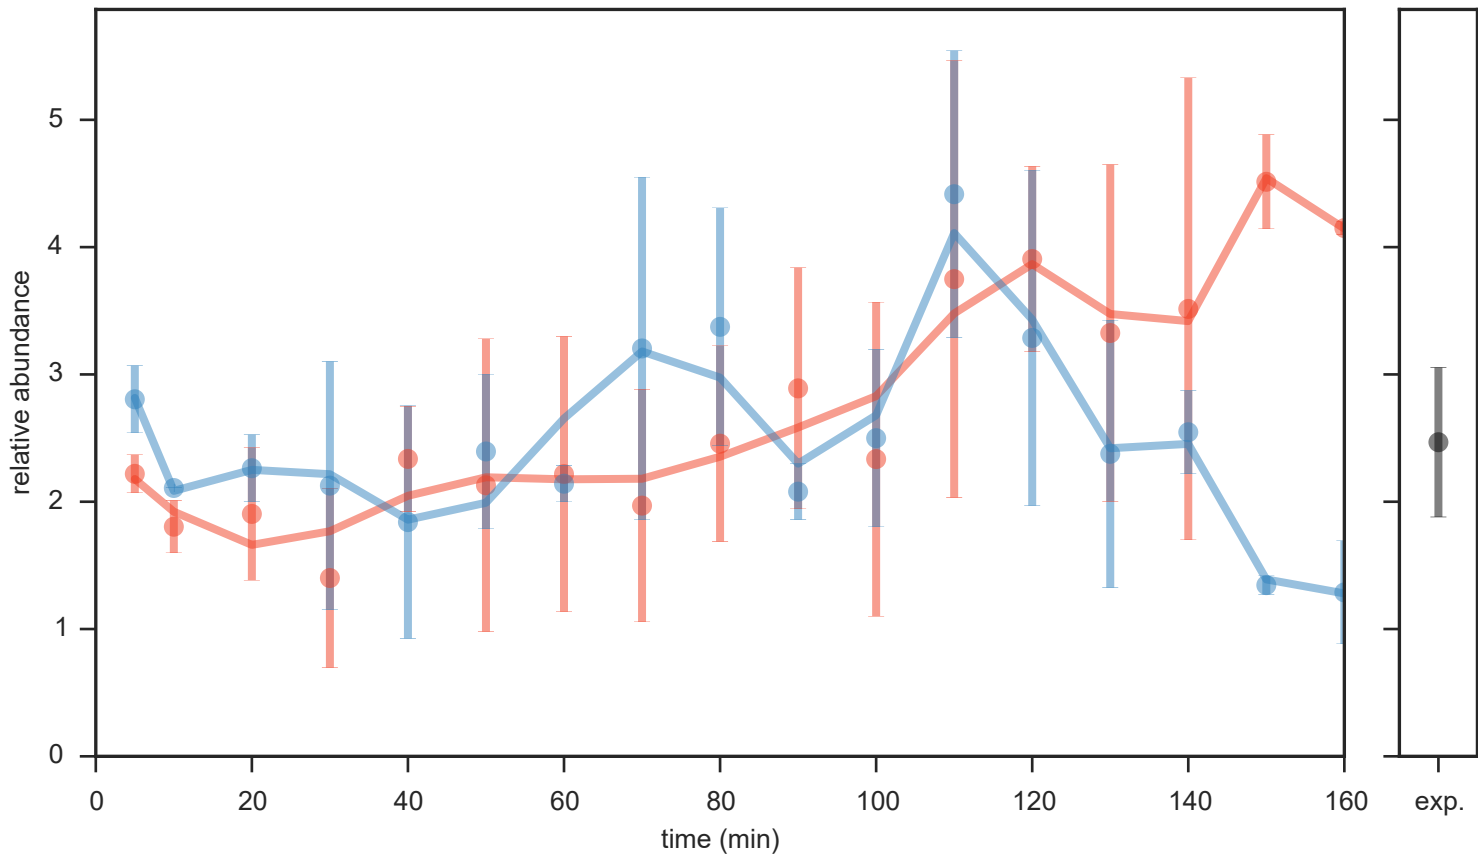



idms\_pid1188\_mz420.02

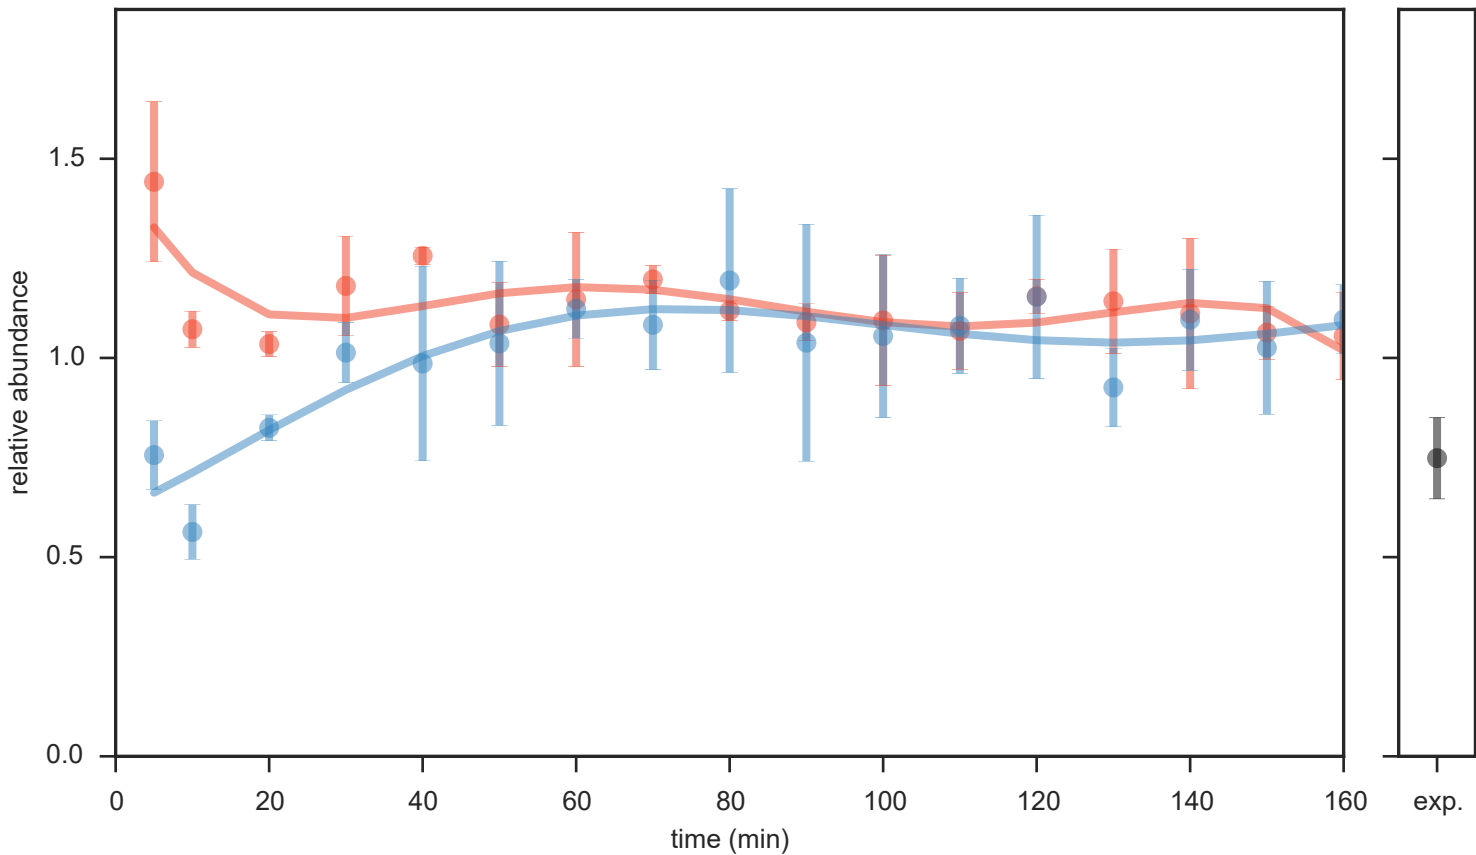

idms\_pid1190\_mz244.91

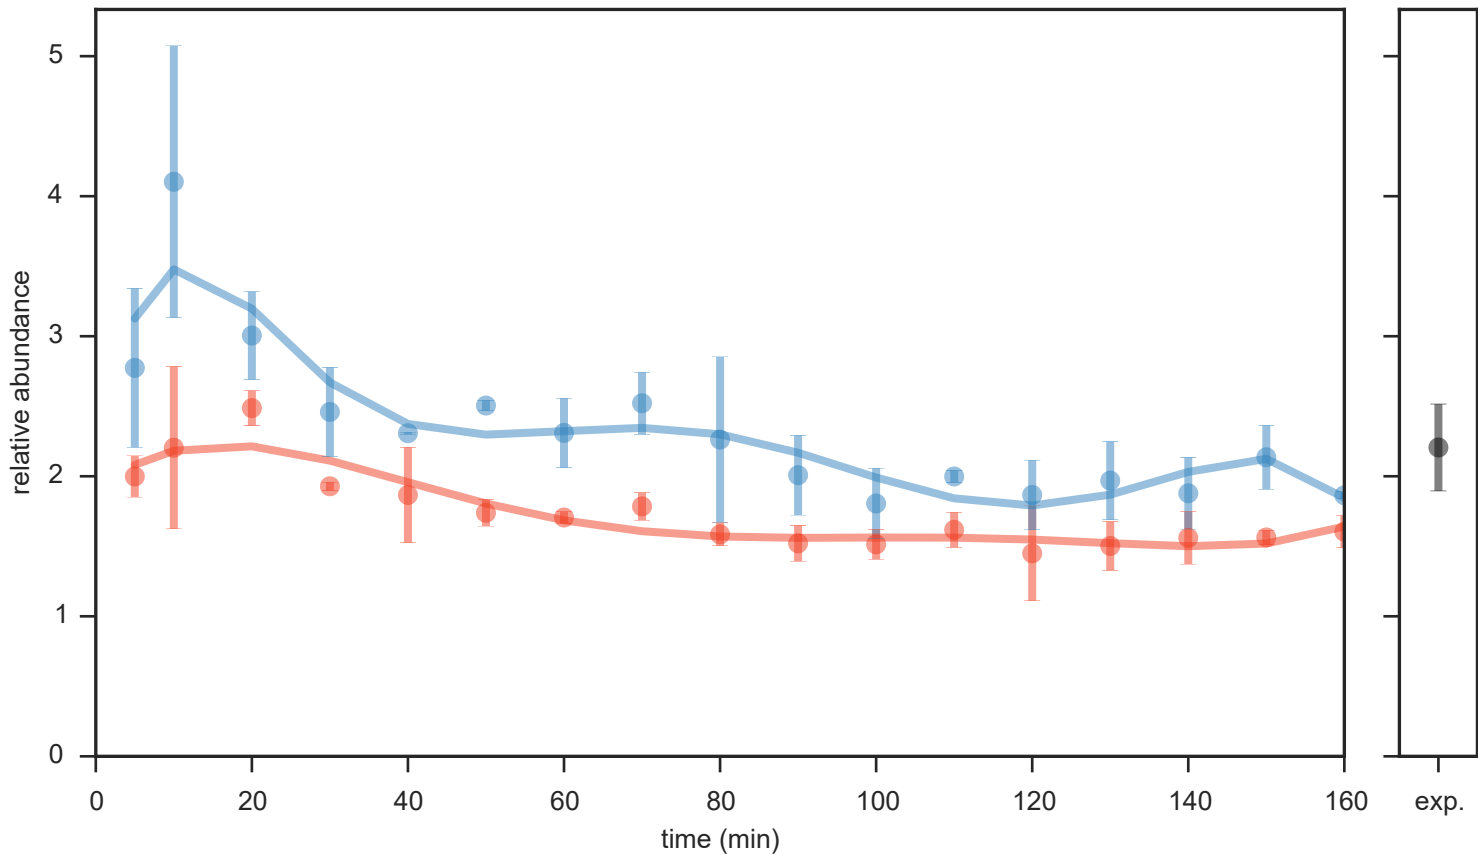

idms\_pid1201\_mz180.52

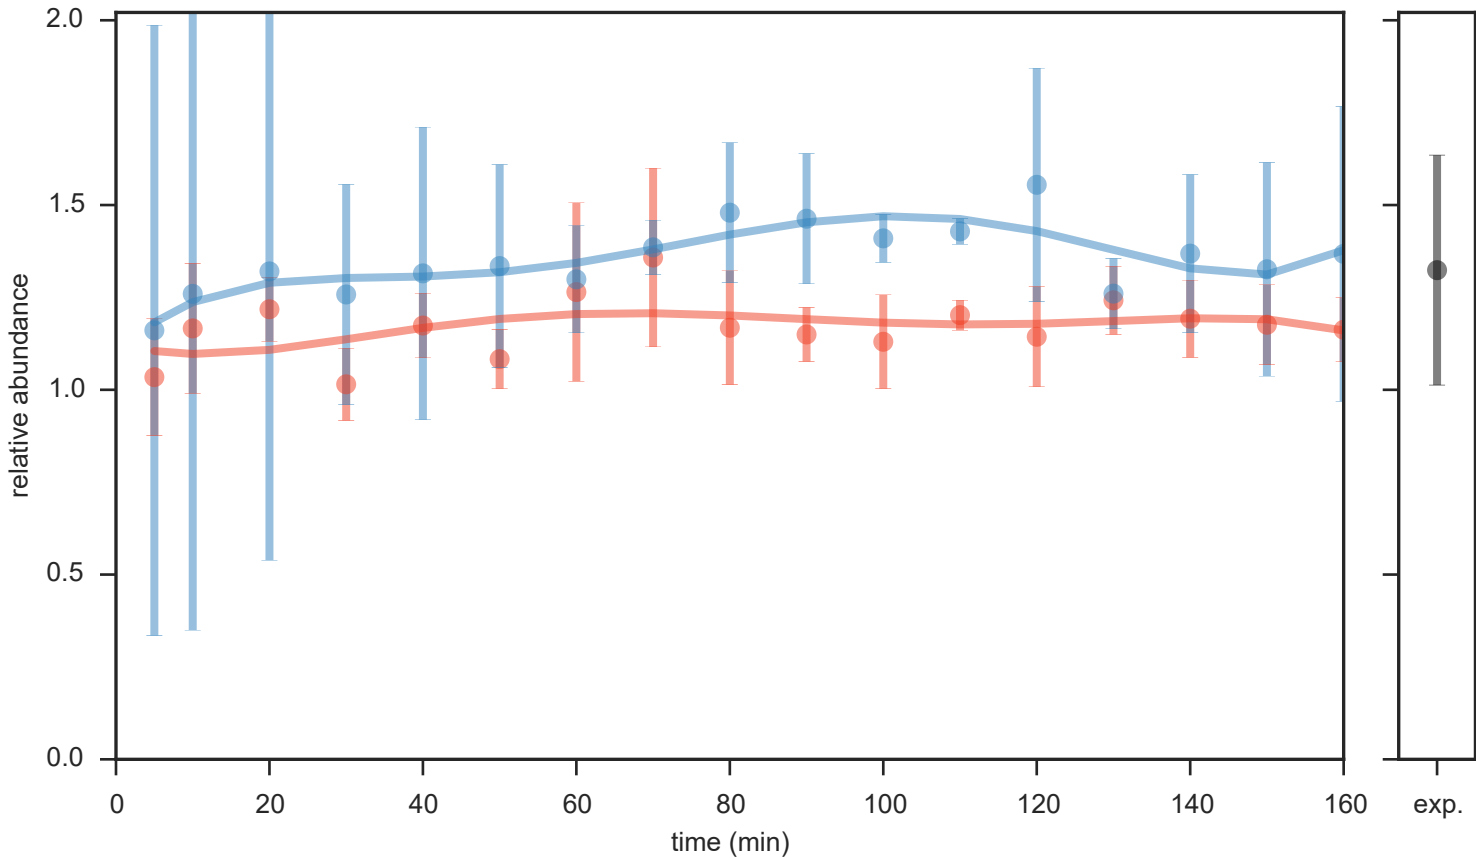

idms\_pid1207\_mz403.07

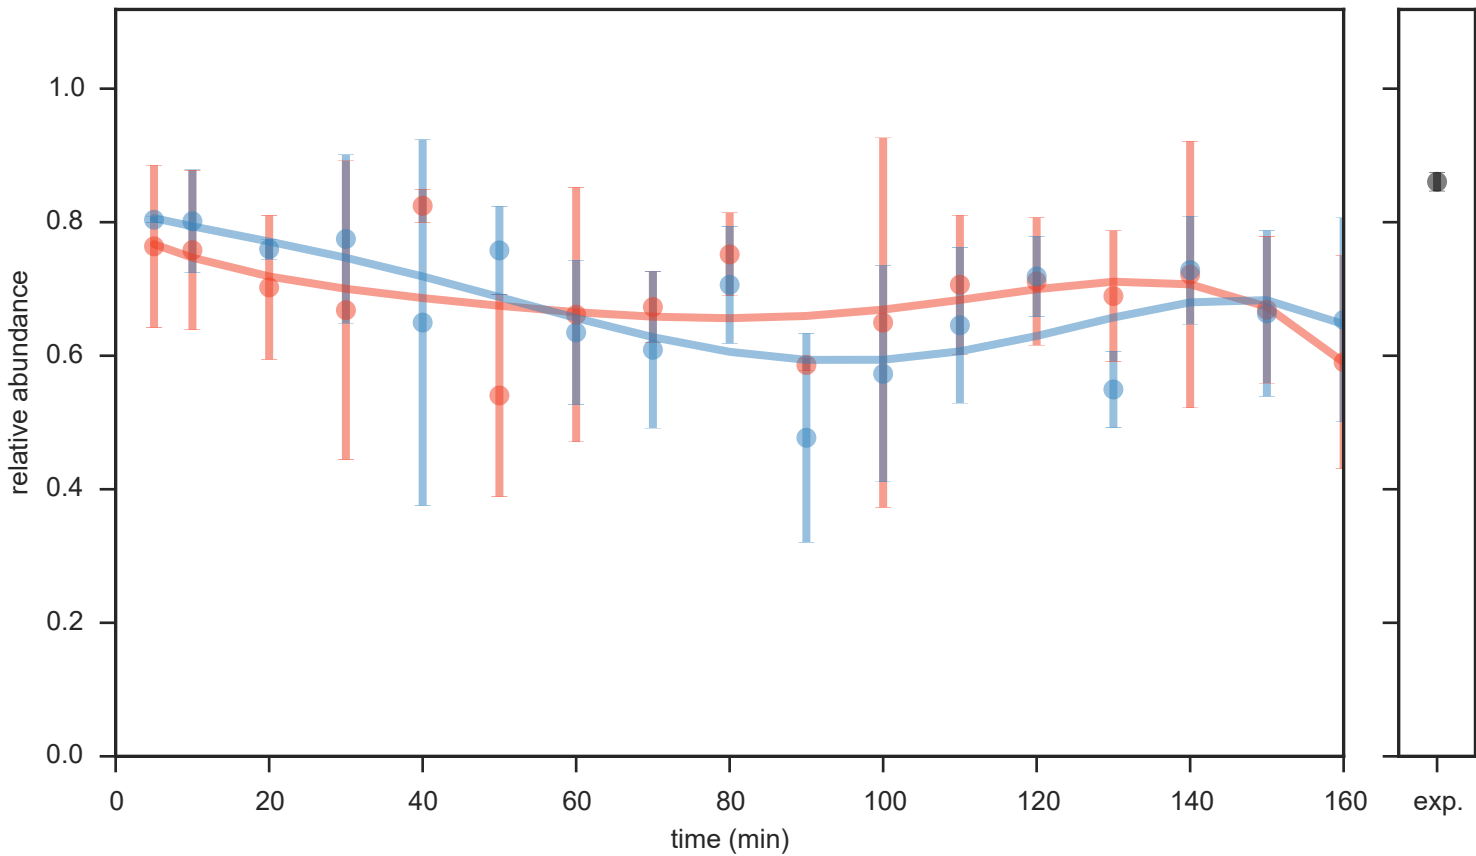

idms\_pid1260\_mz334.95

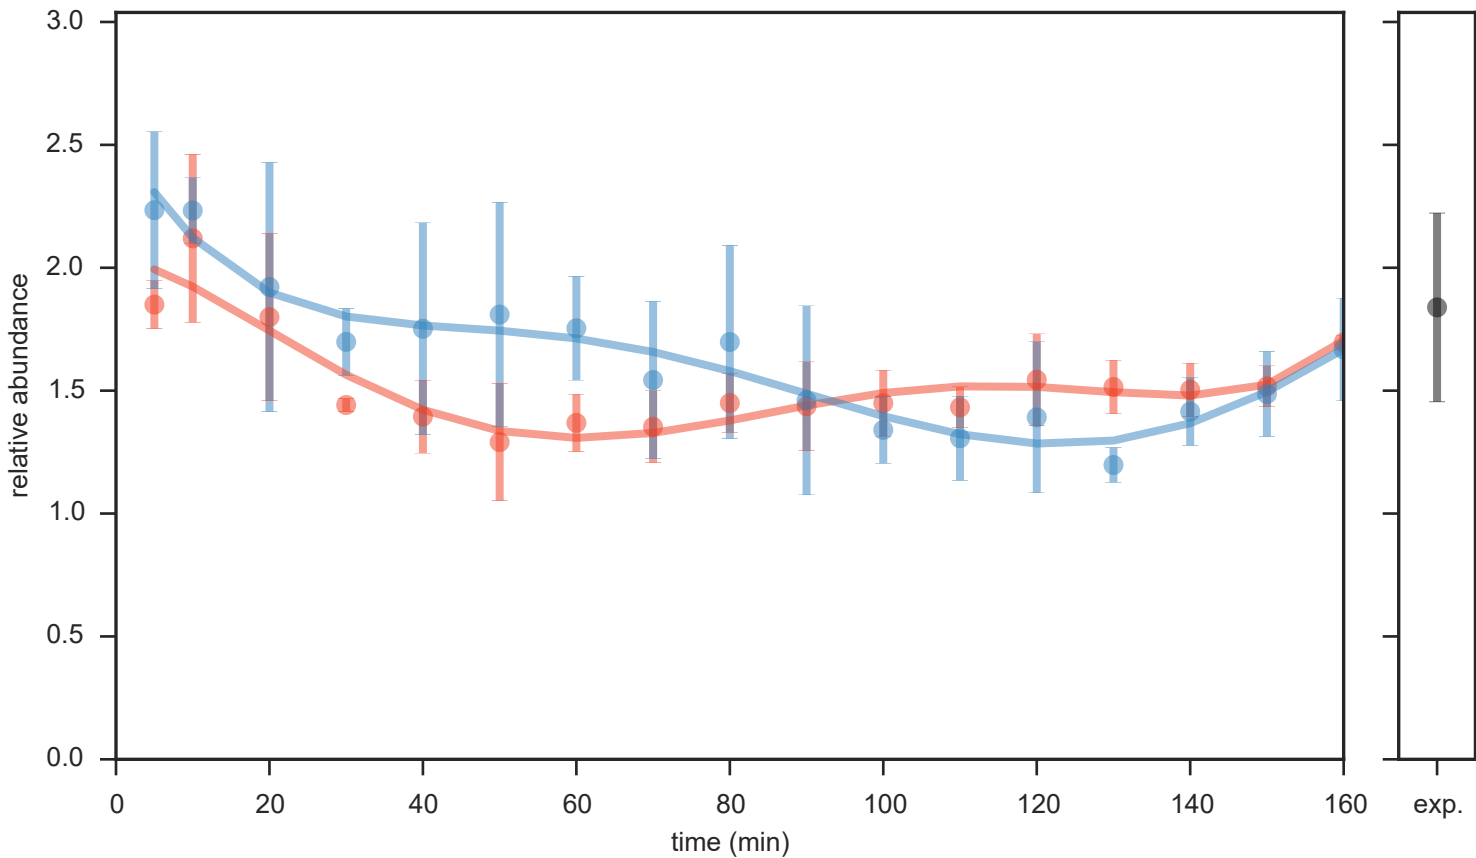

idms\_pid1266\_mz296.97

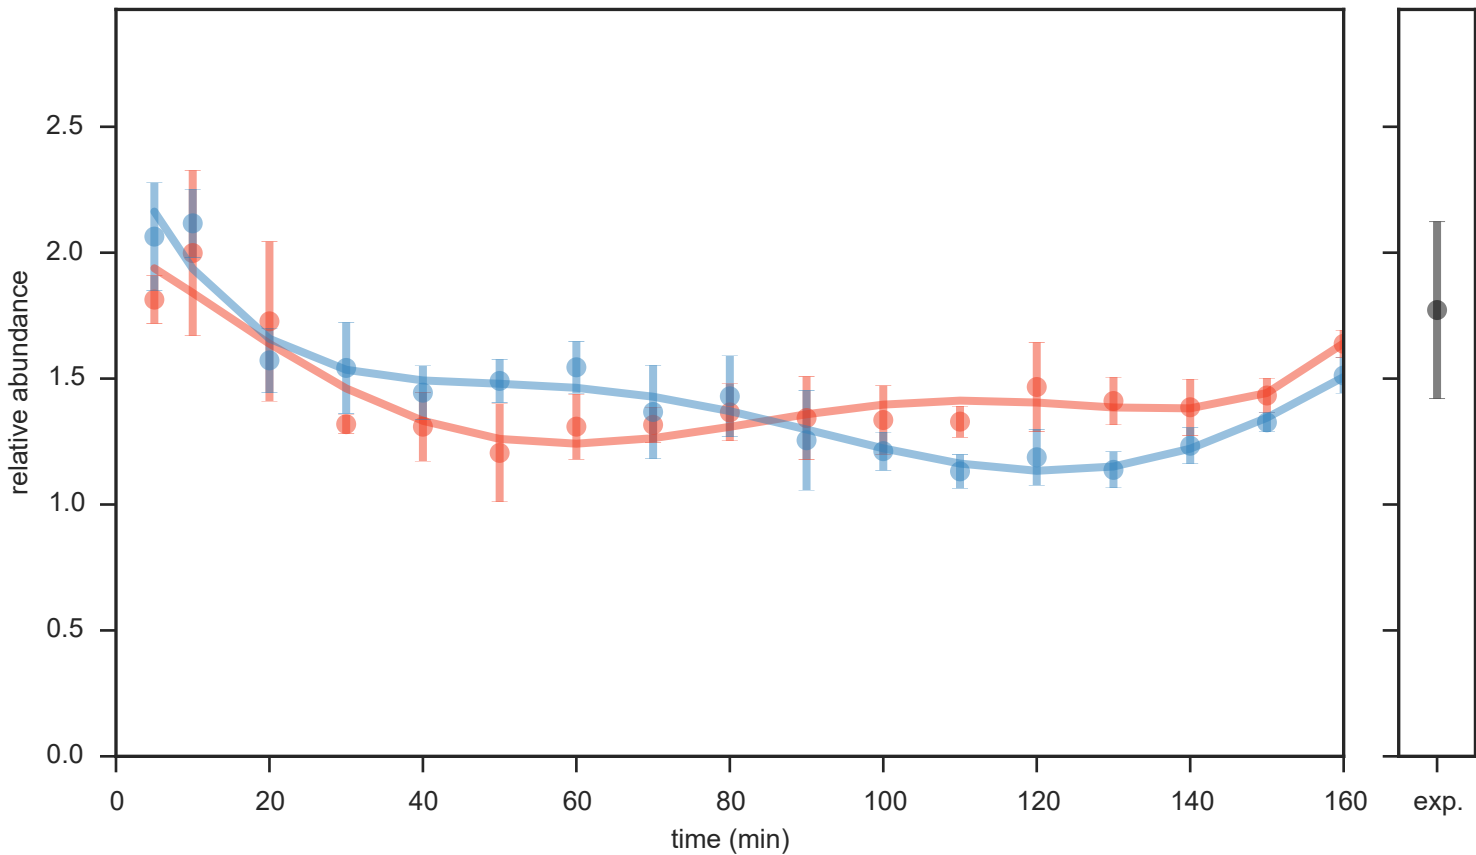

idms\_pid1277\_mz344.03

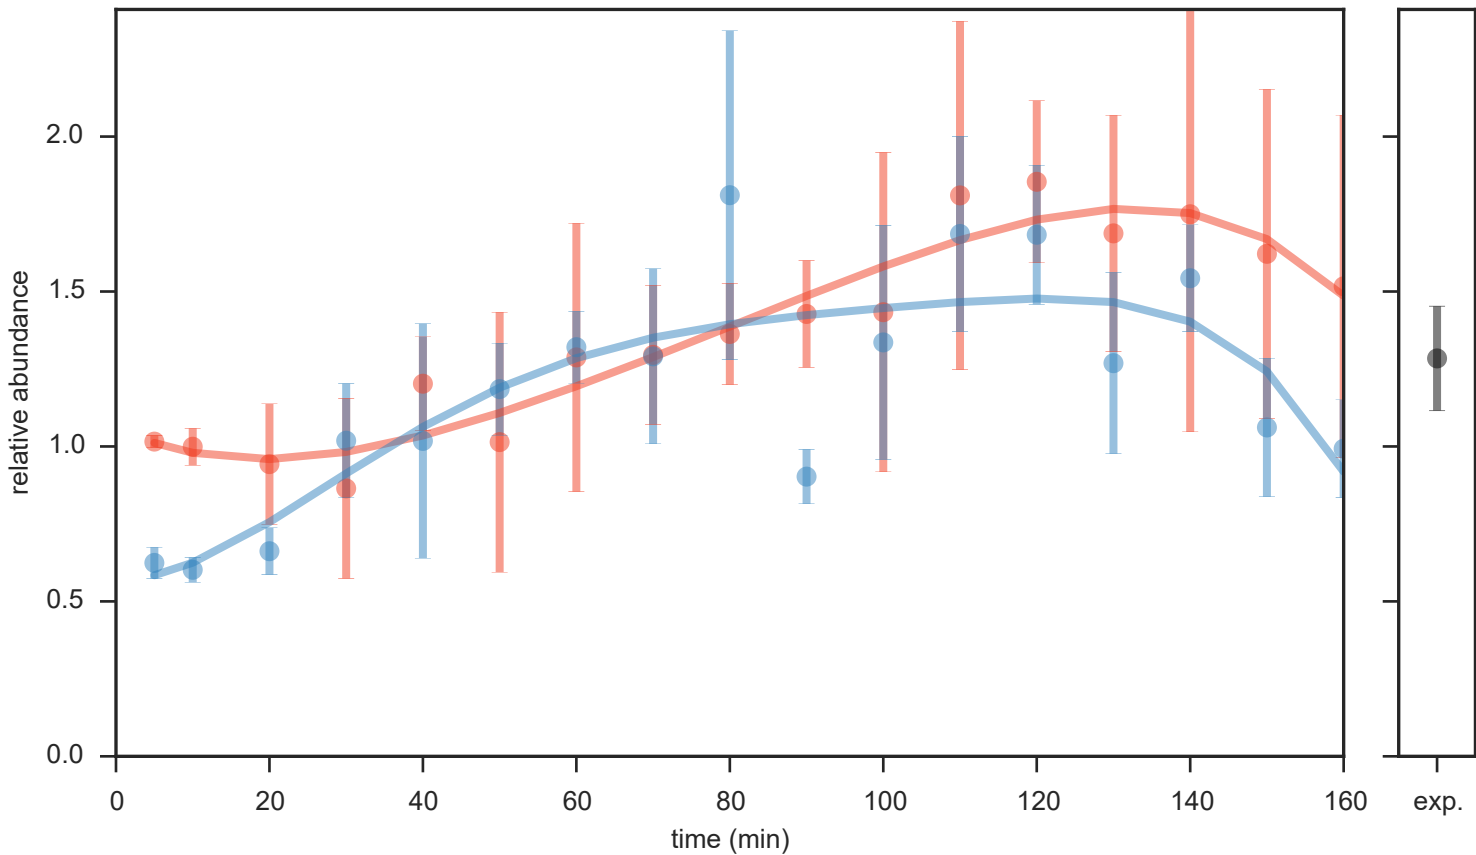

idms\_pid1279\_mz299.51

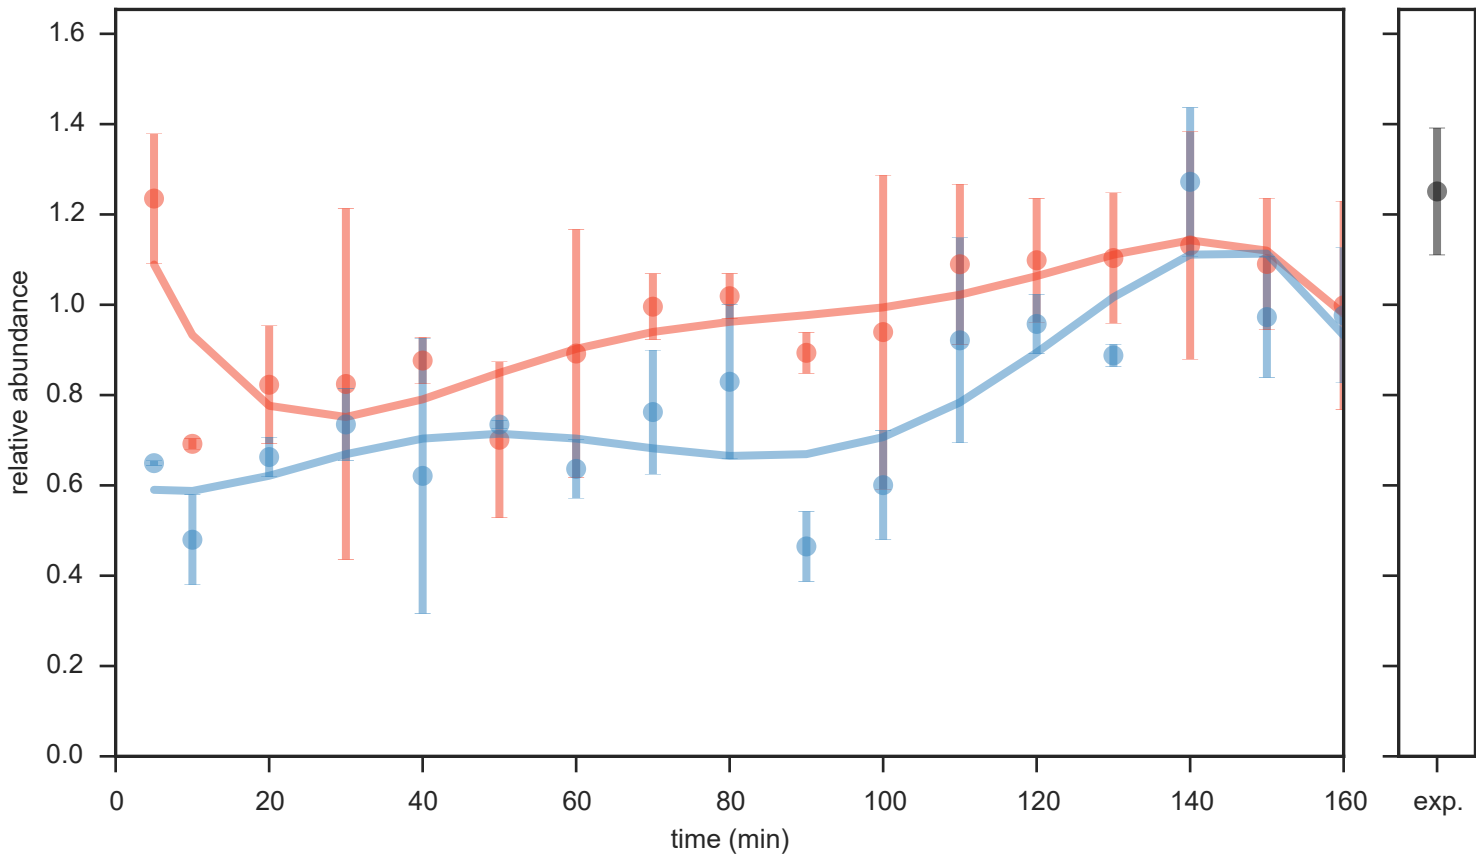



idms\_pid1302\_mz356.38

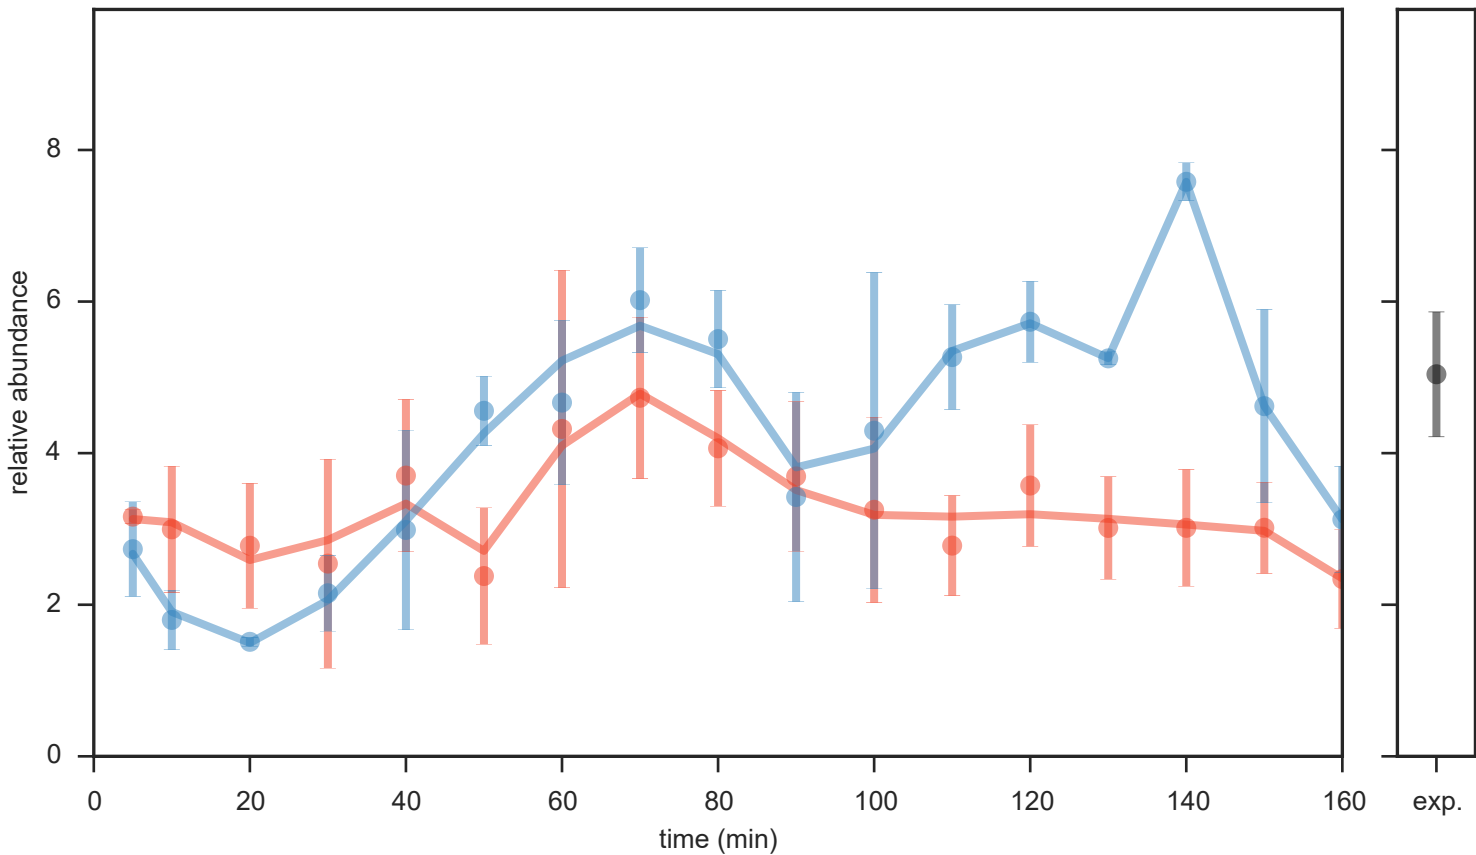

idms\_pid1318\_mz183.99

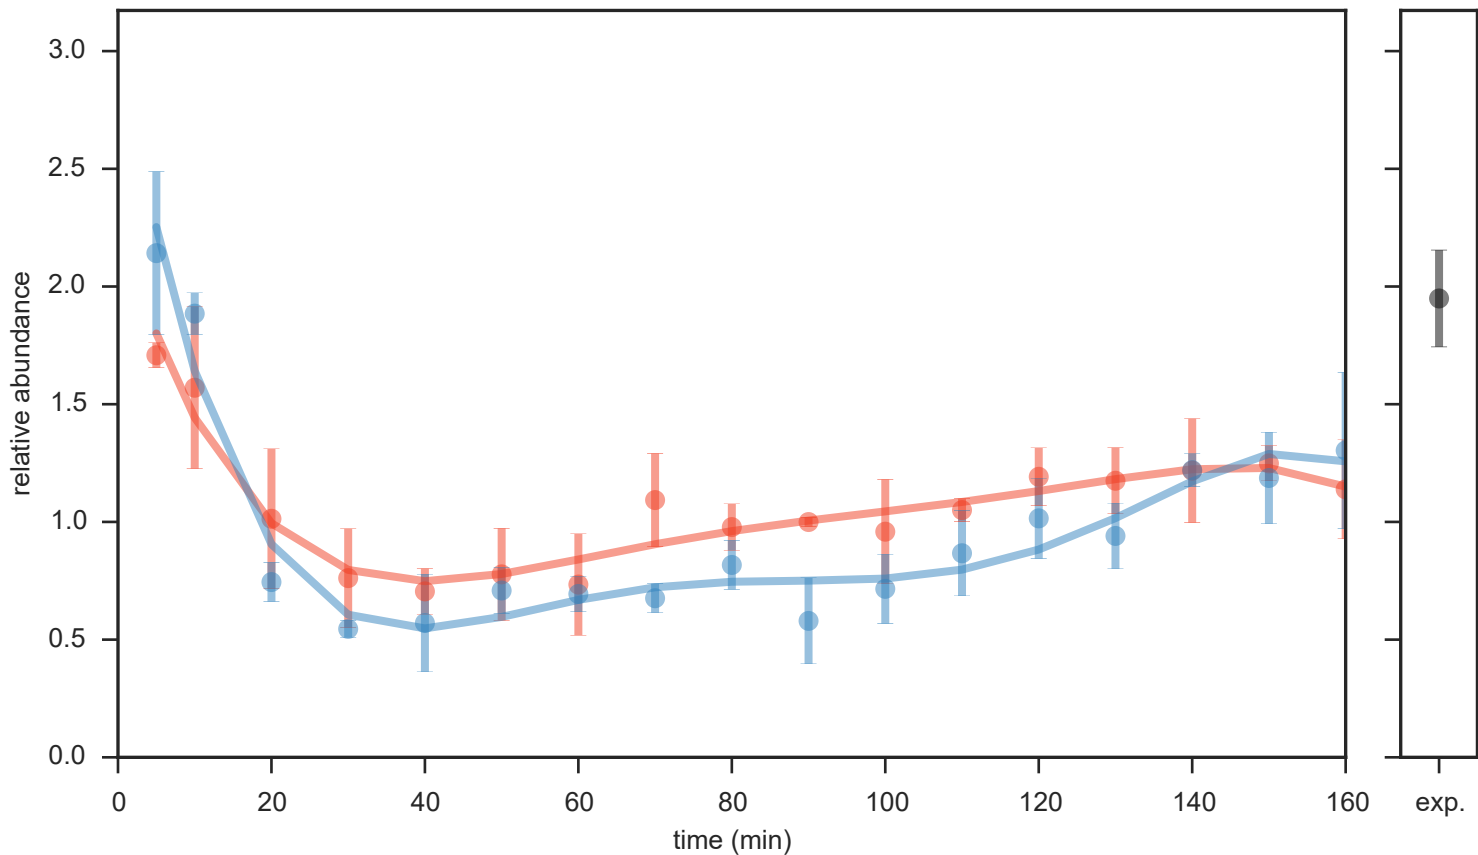

idms\_pid1320\_mz321.05

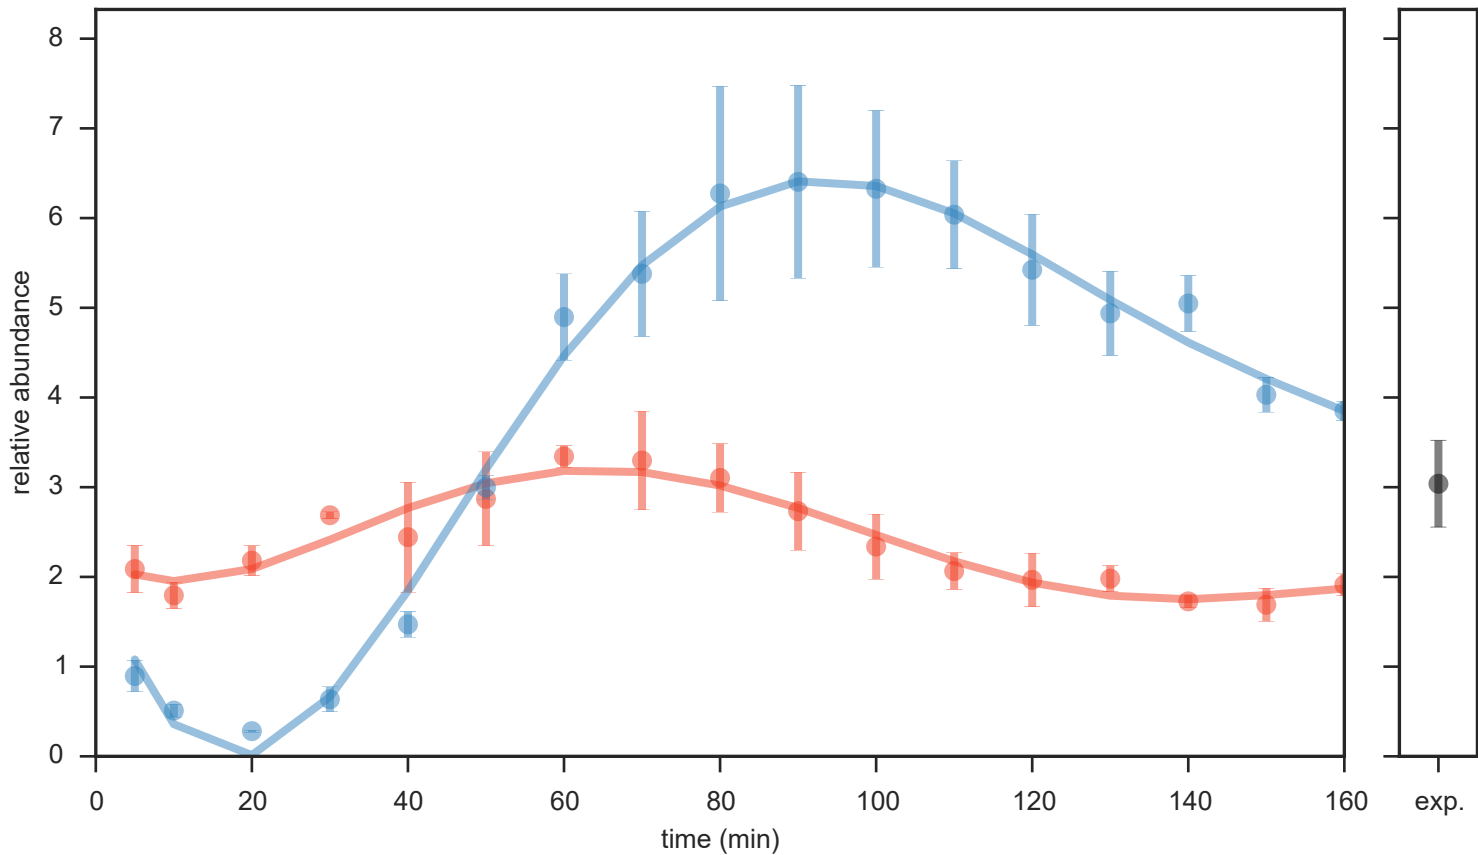

idms\_pid1336\_mz158.00

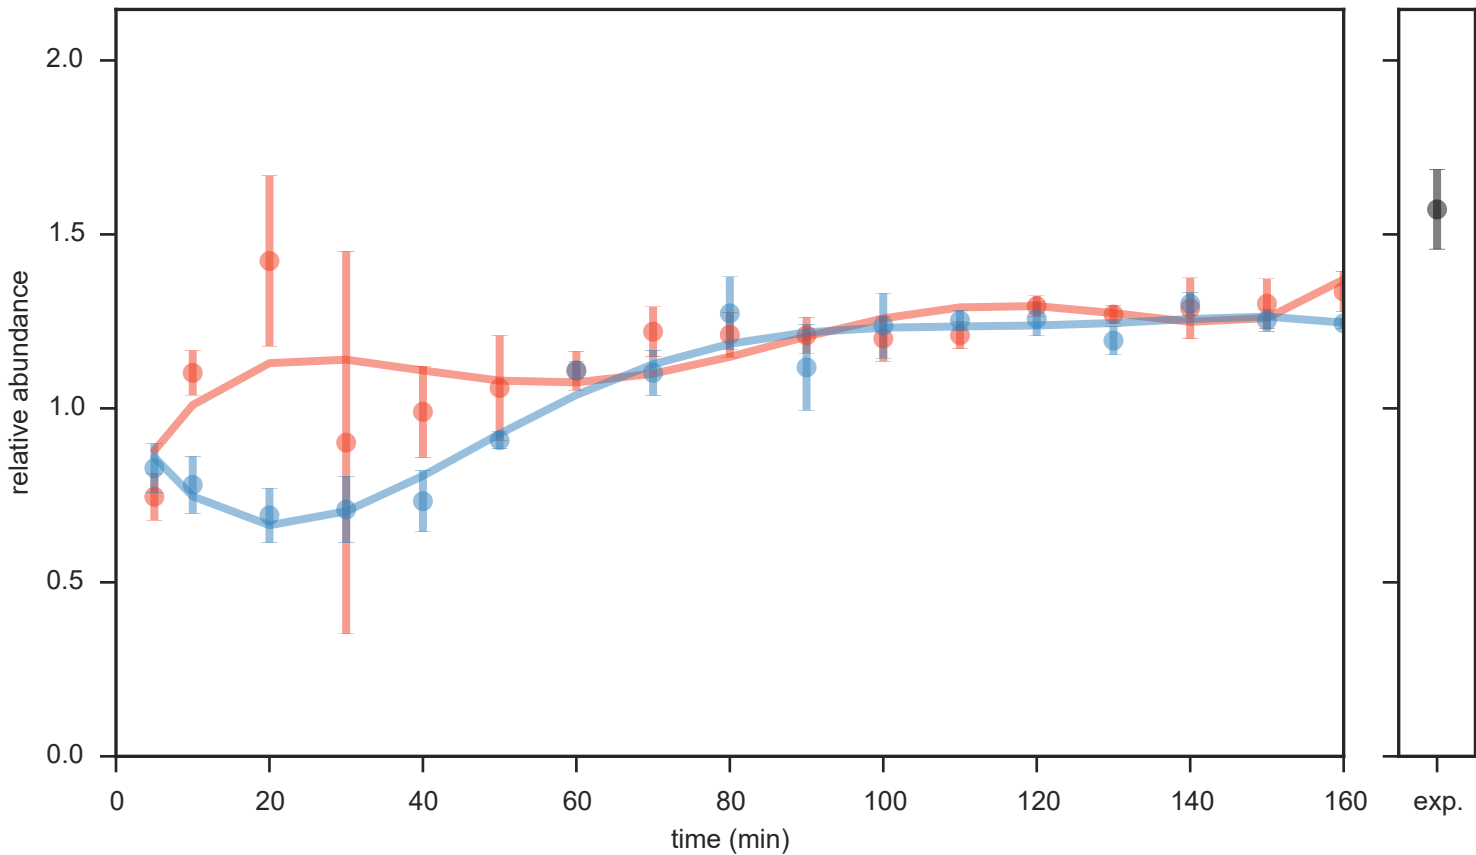

idms\_pid1341\_mz362.04

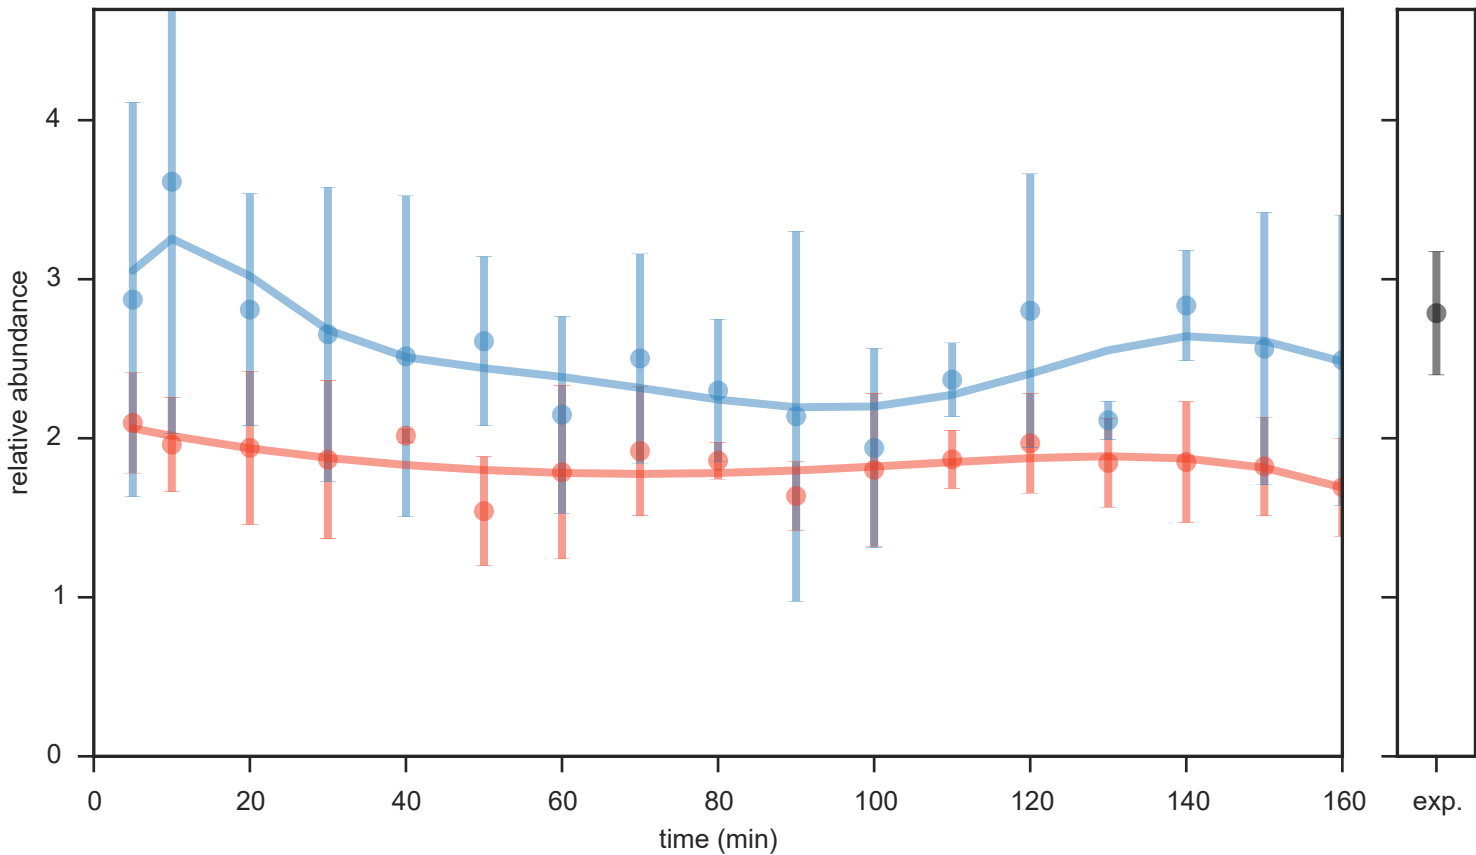

idms\_pid1345\_mz206.96

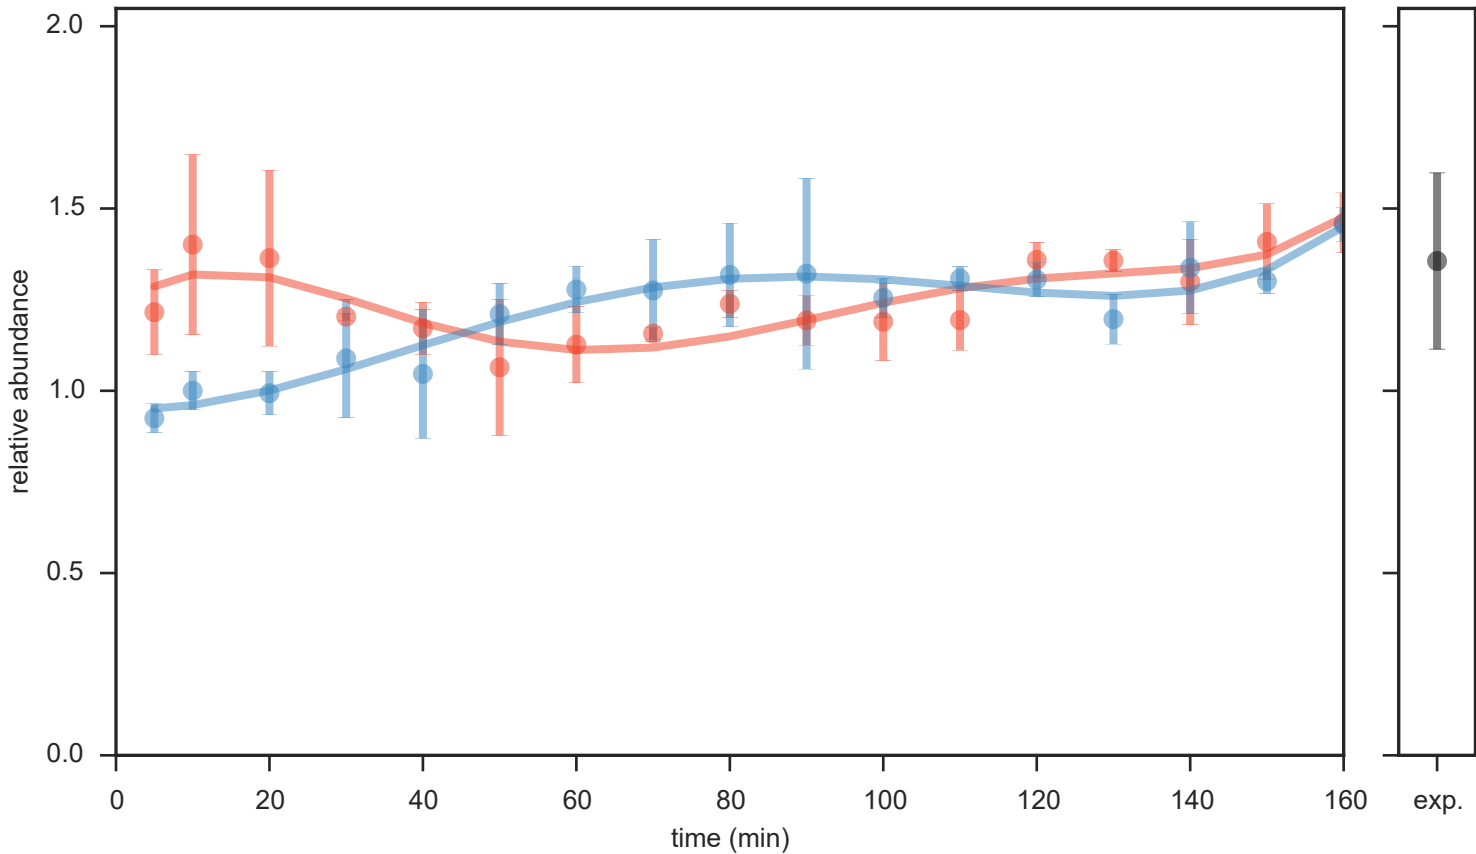

idms\_pid1364\_mz254.69

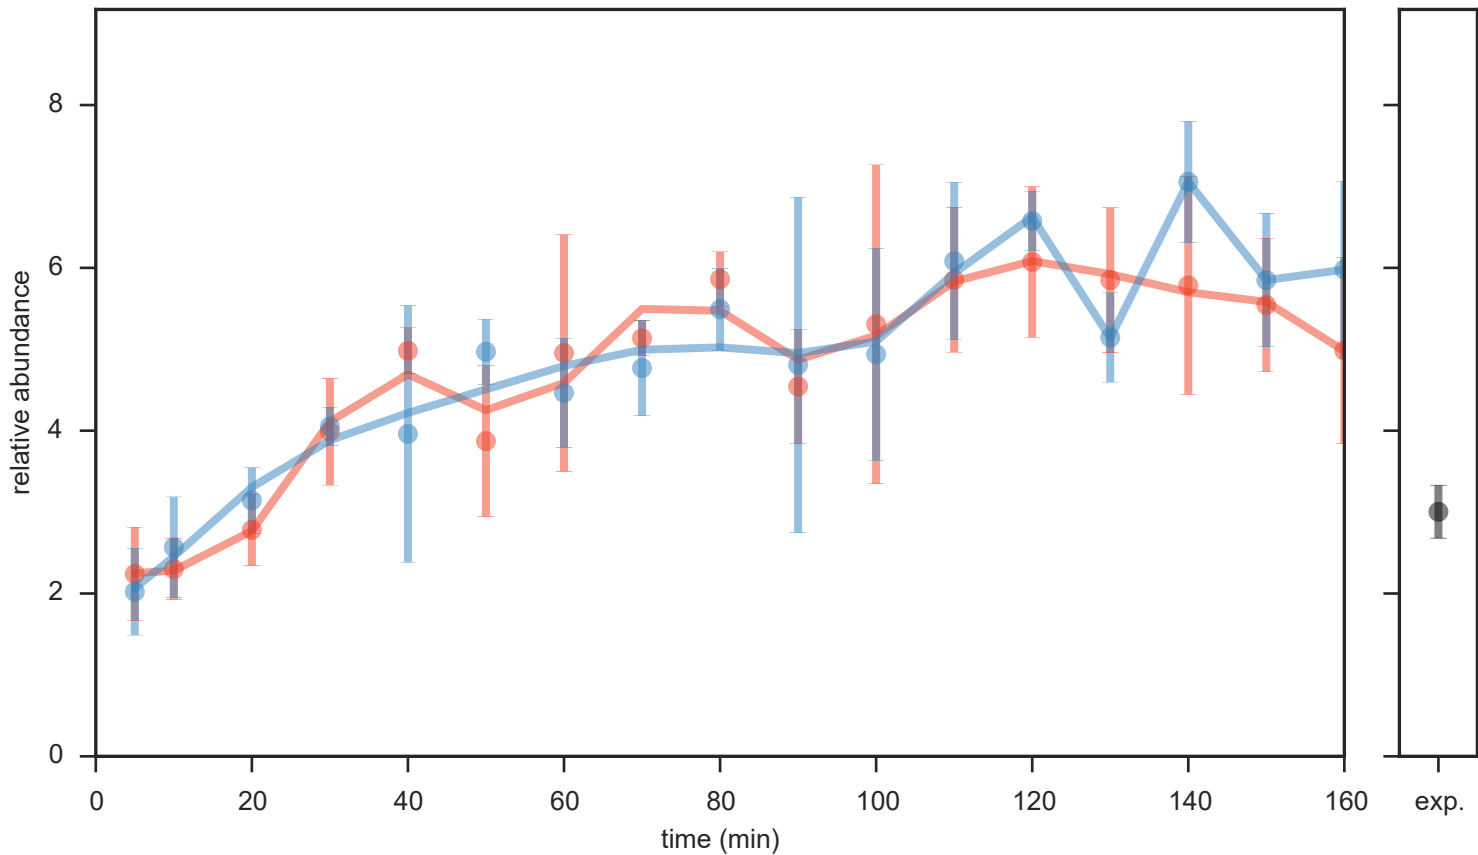

idms\_pid1368\_mz280.02

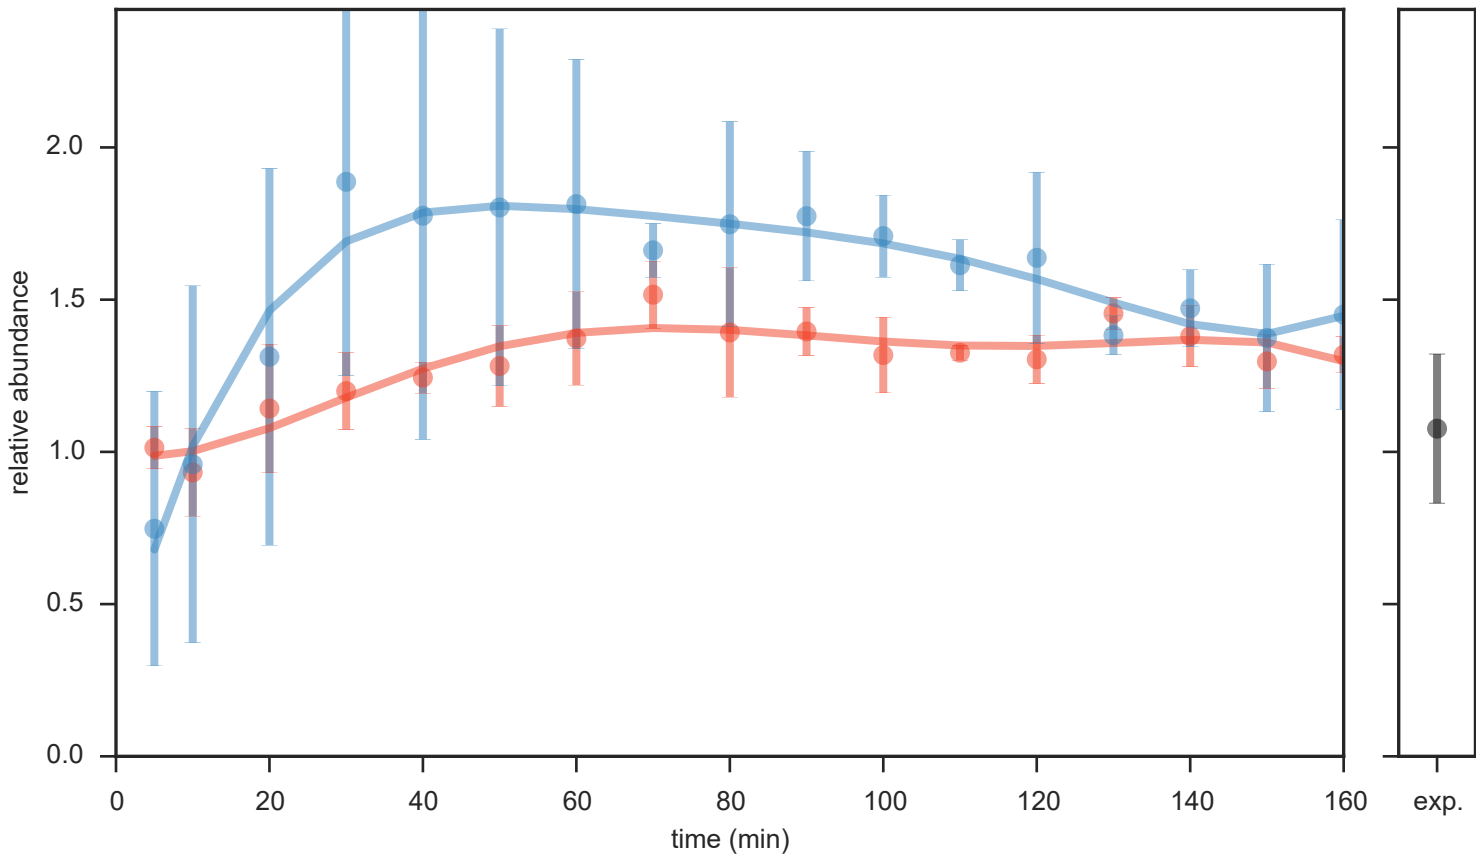



idms\_pid1372\_mz175.97

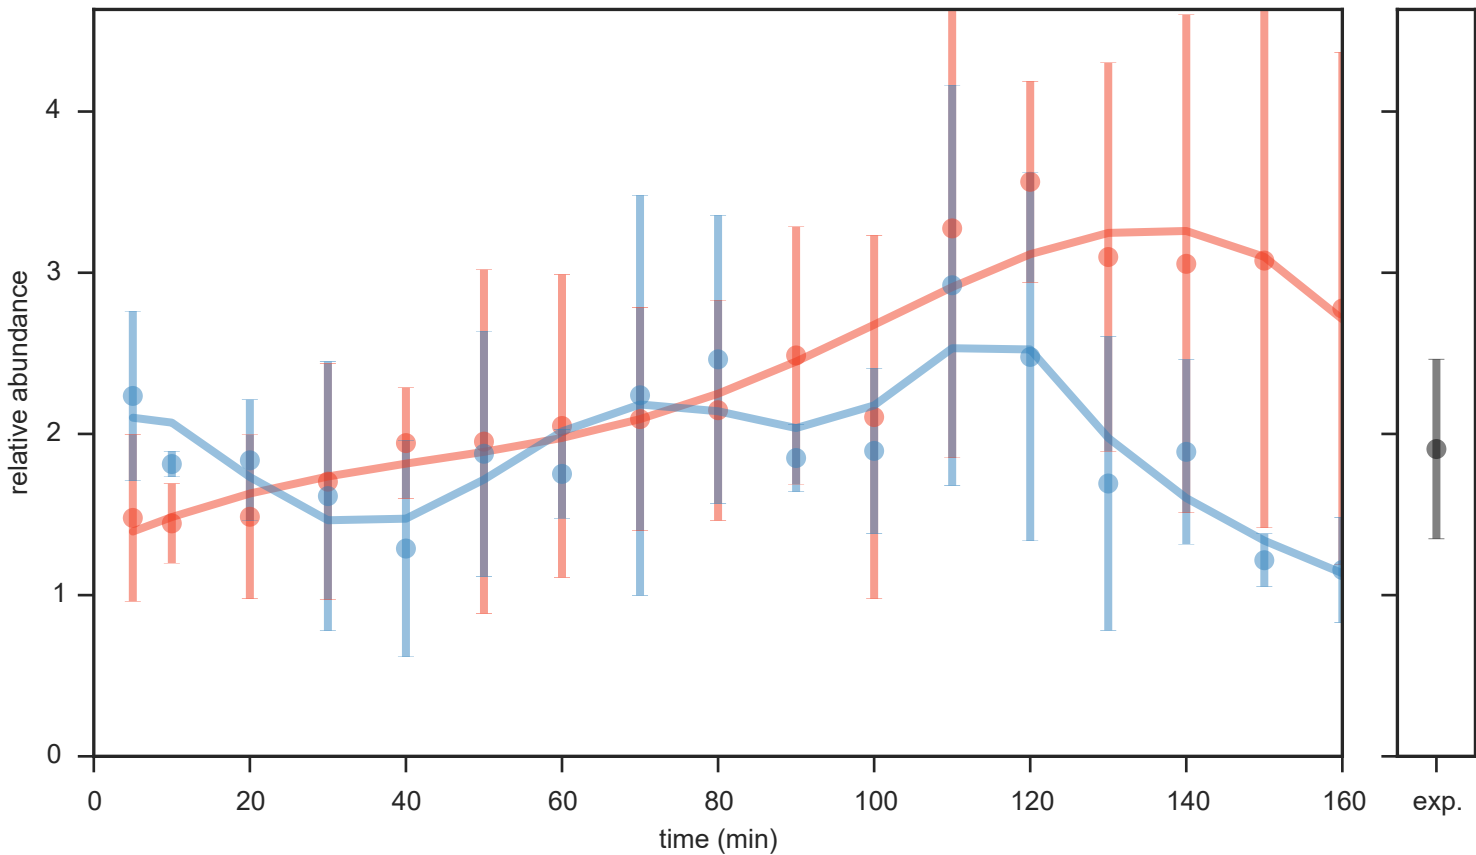

idms\_pid1374\_mz320.33

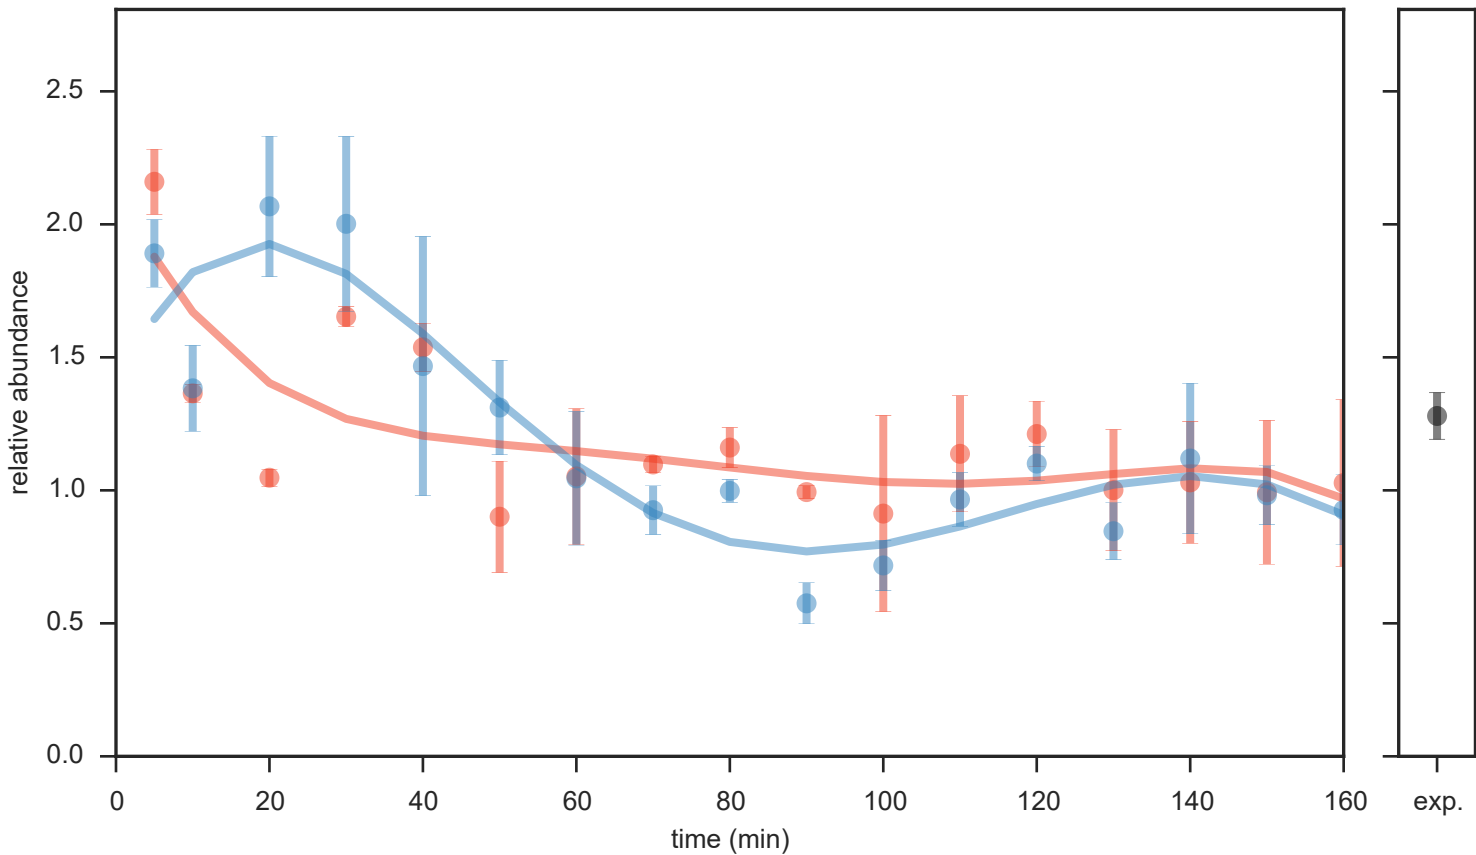

idms\_pid1386\_mz444.02

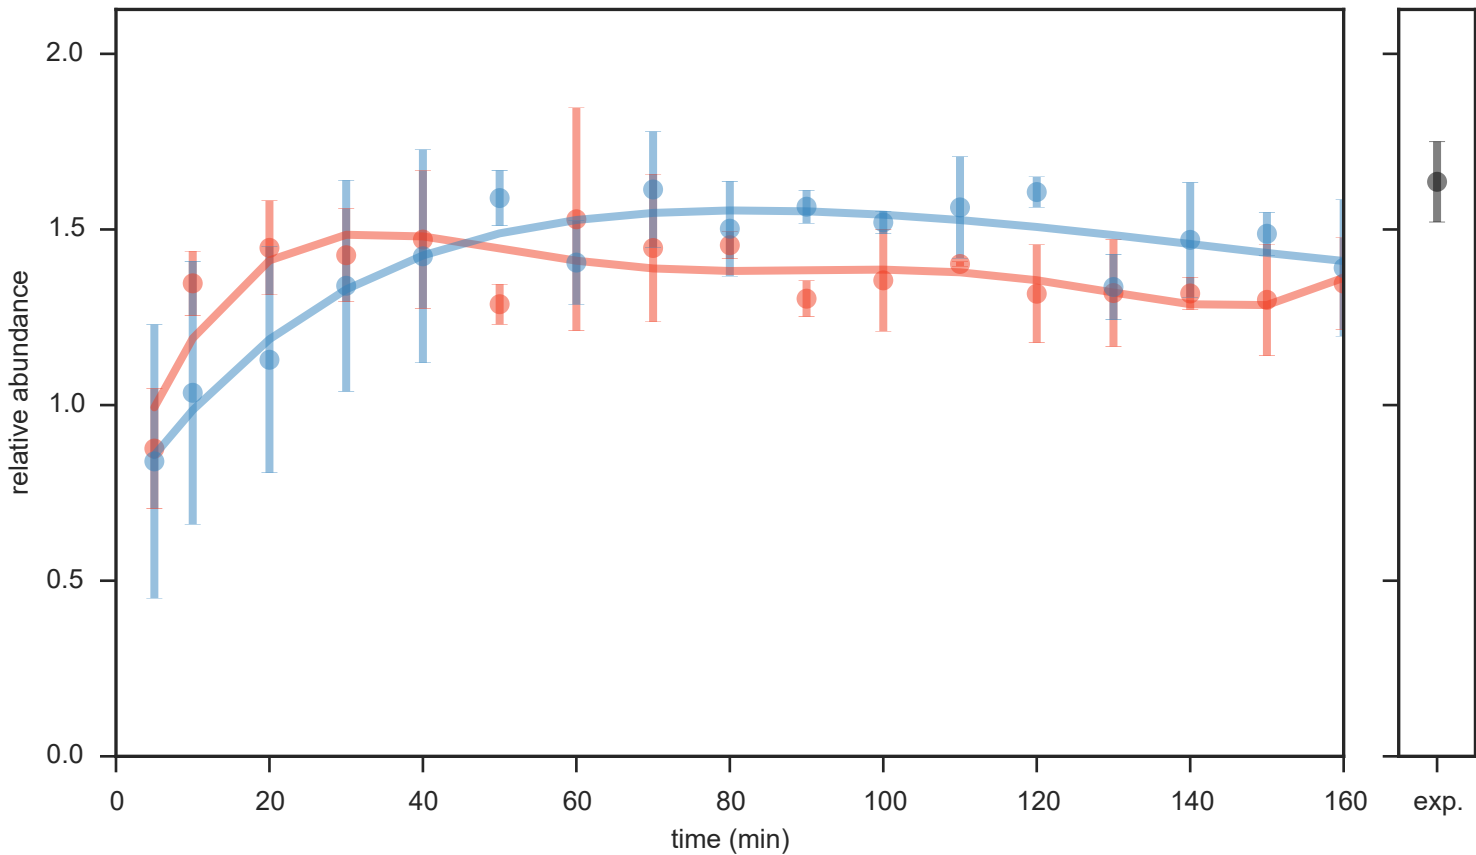

idms\_pid1389\_mz290.96

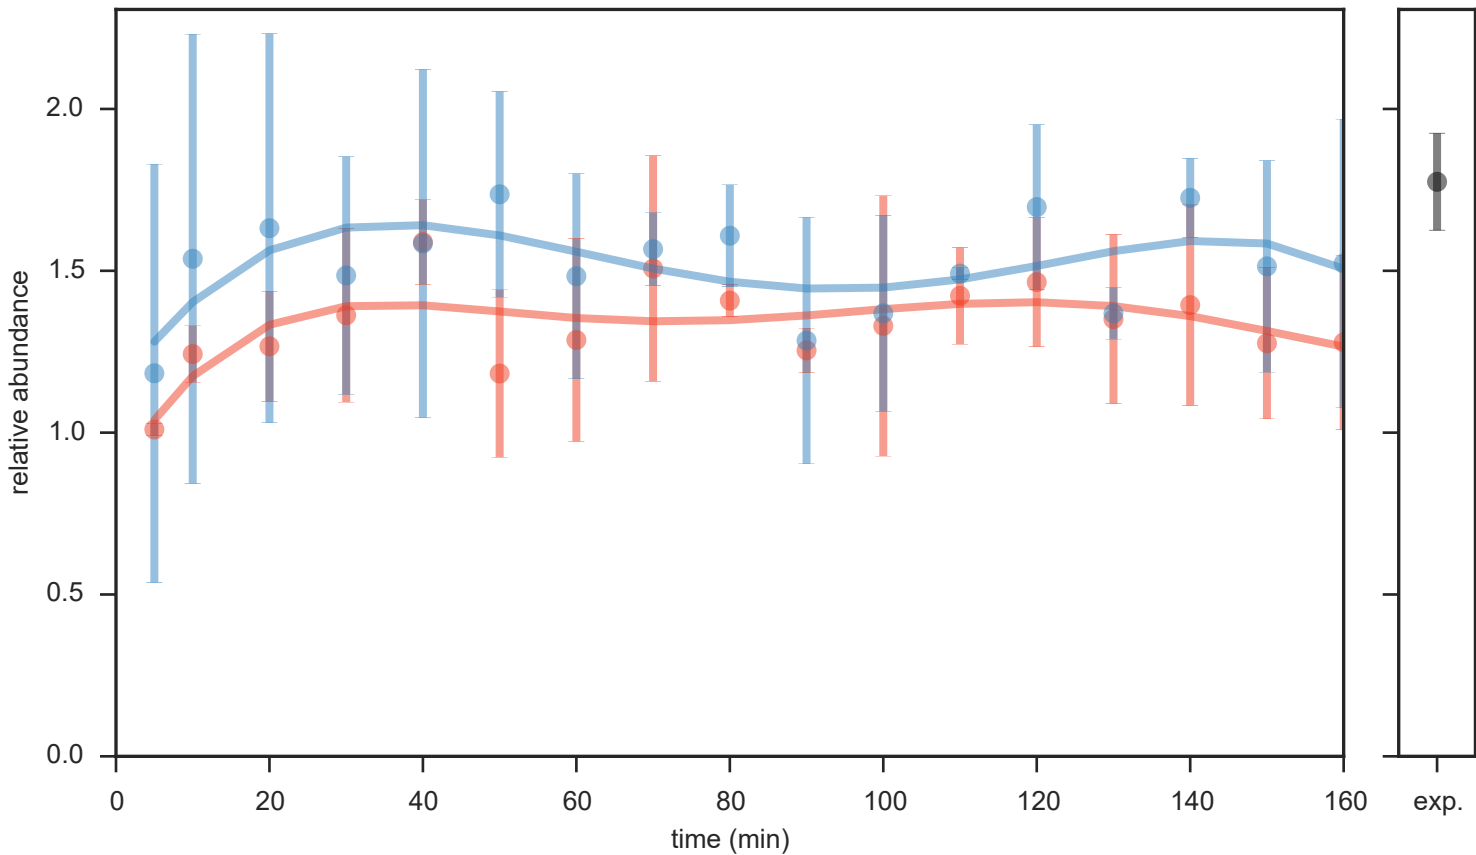

idms\_pid1392\_mz230.98

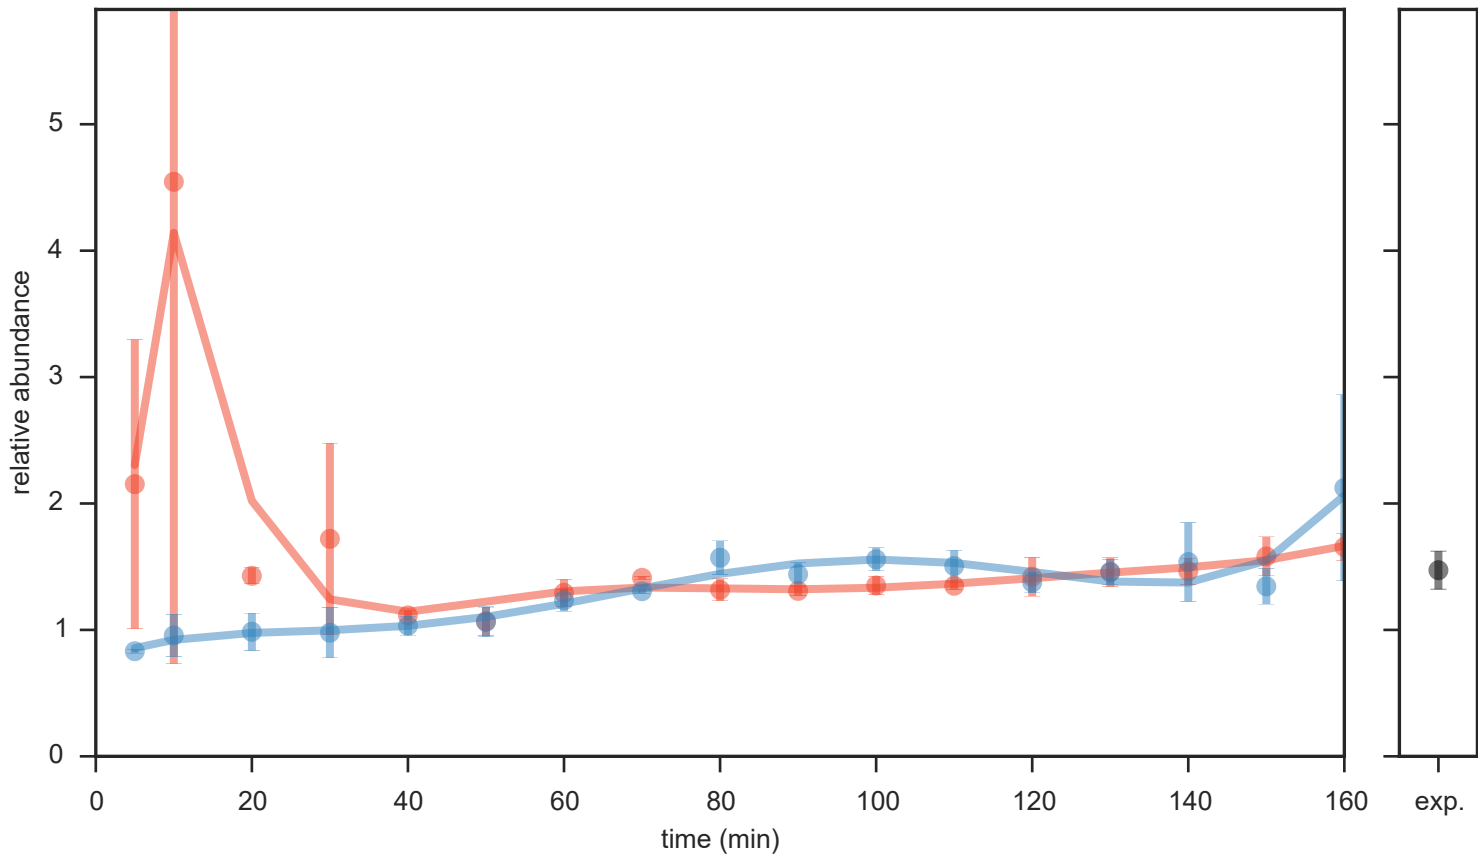

idms\_pid1401\_mz134.04

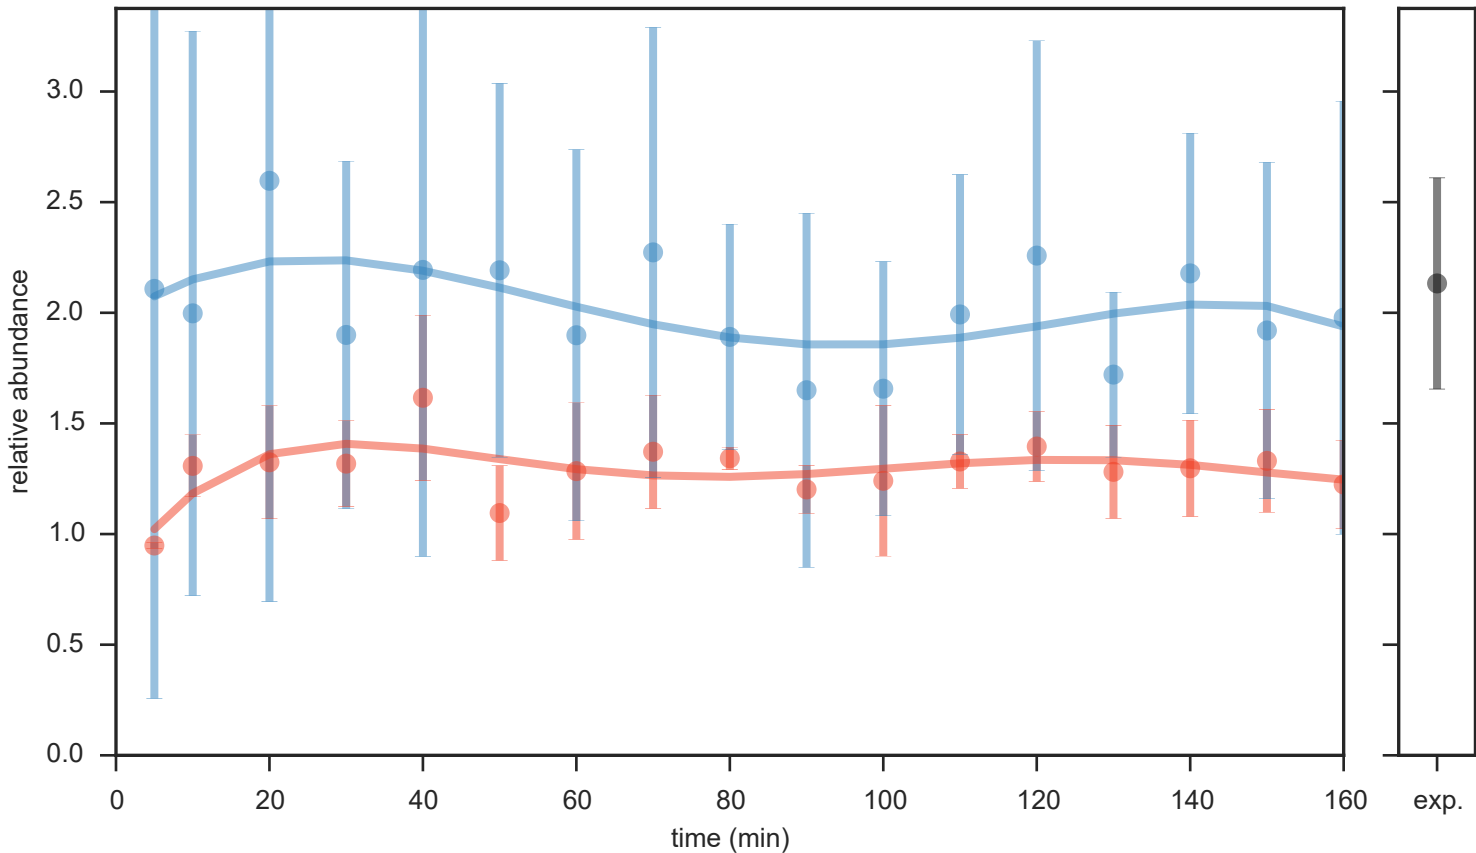

idms\_pid1471\_mz211.95

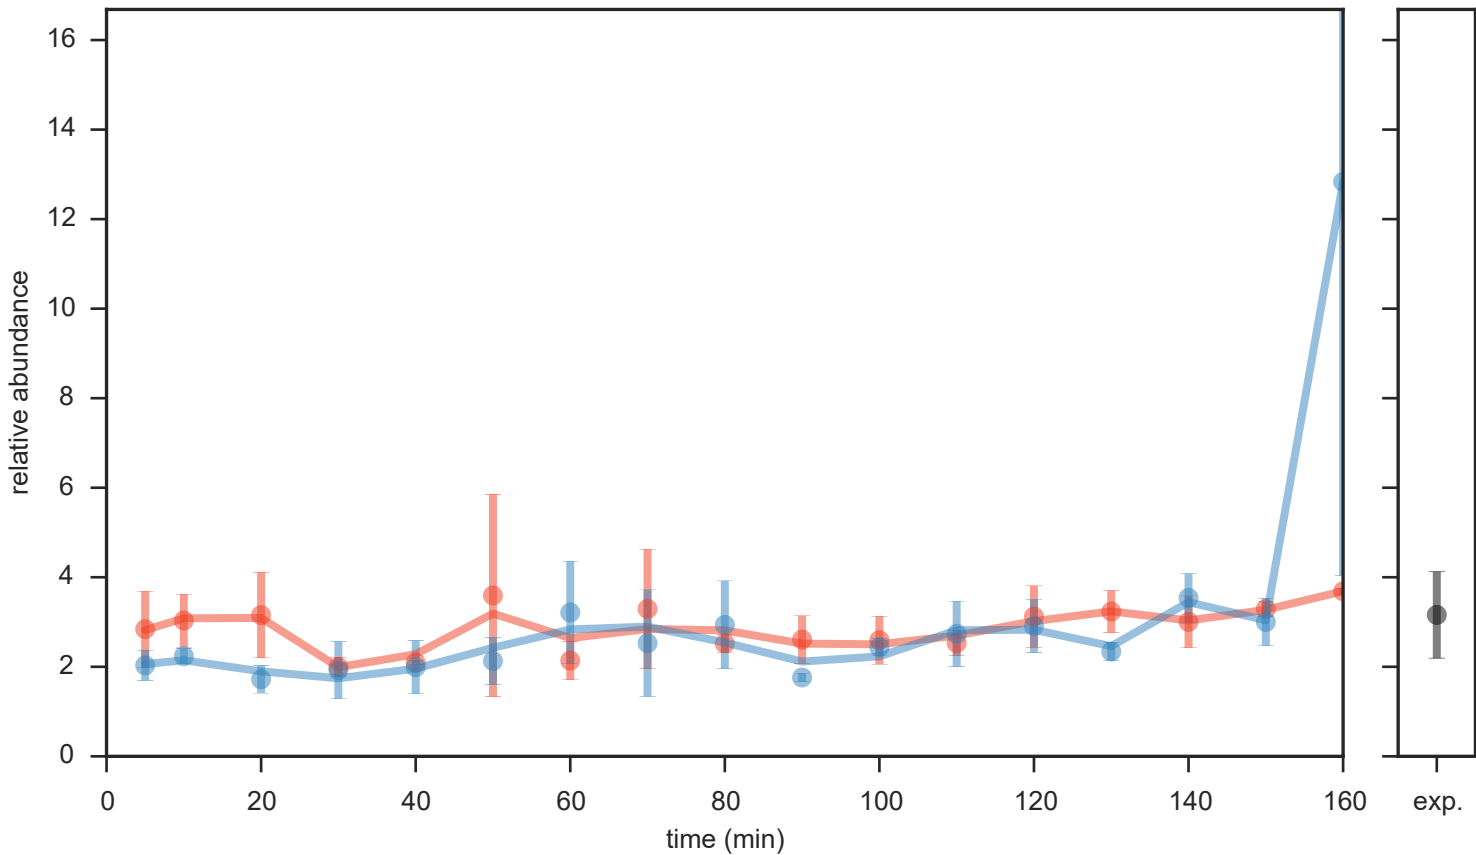

idms\_pid1472\_mz300.04

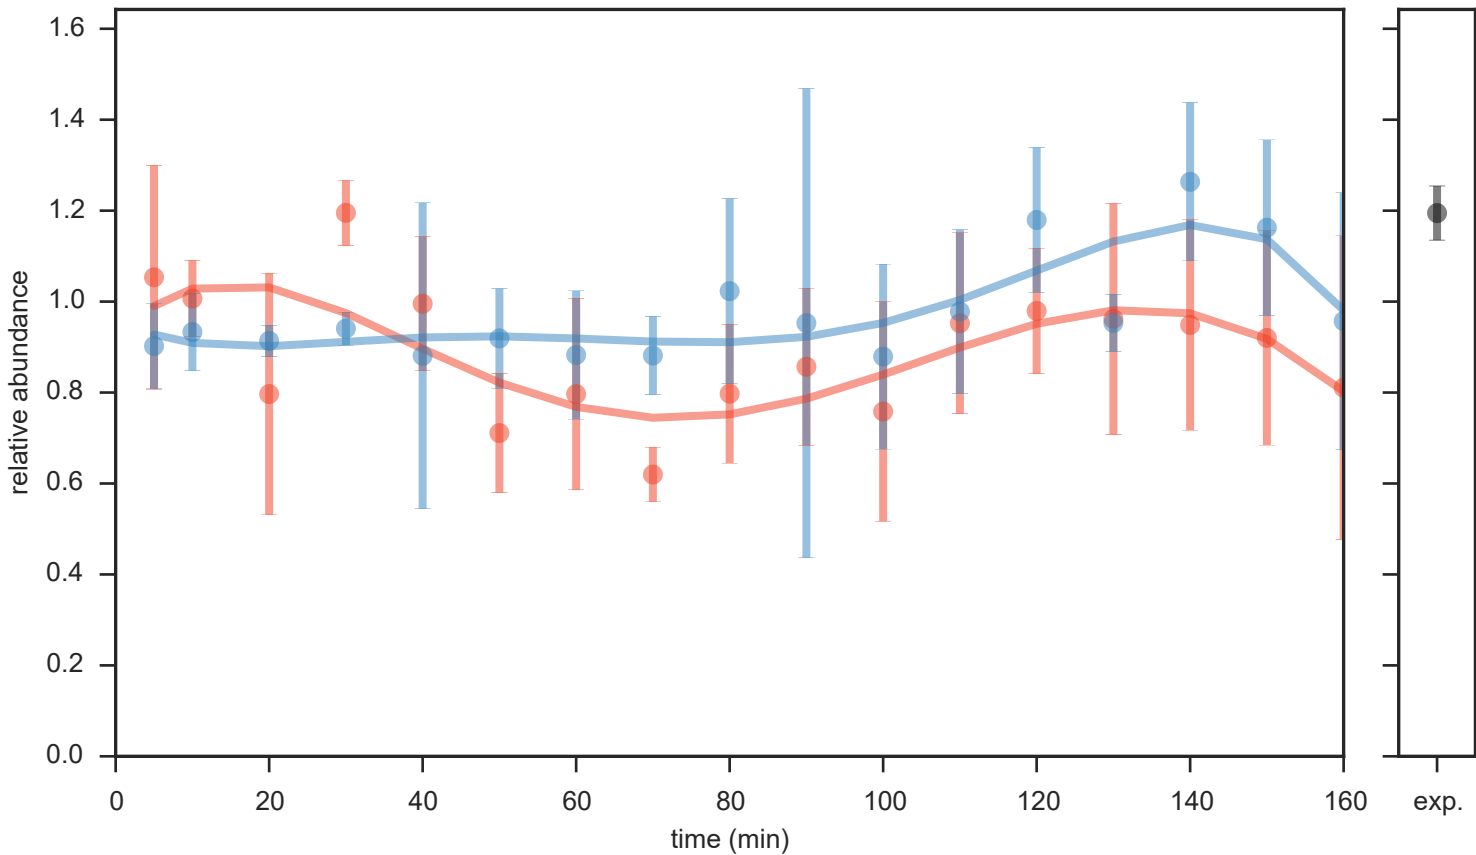



idms\_pid1475\_mz617.02

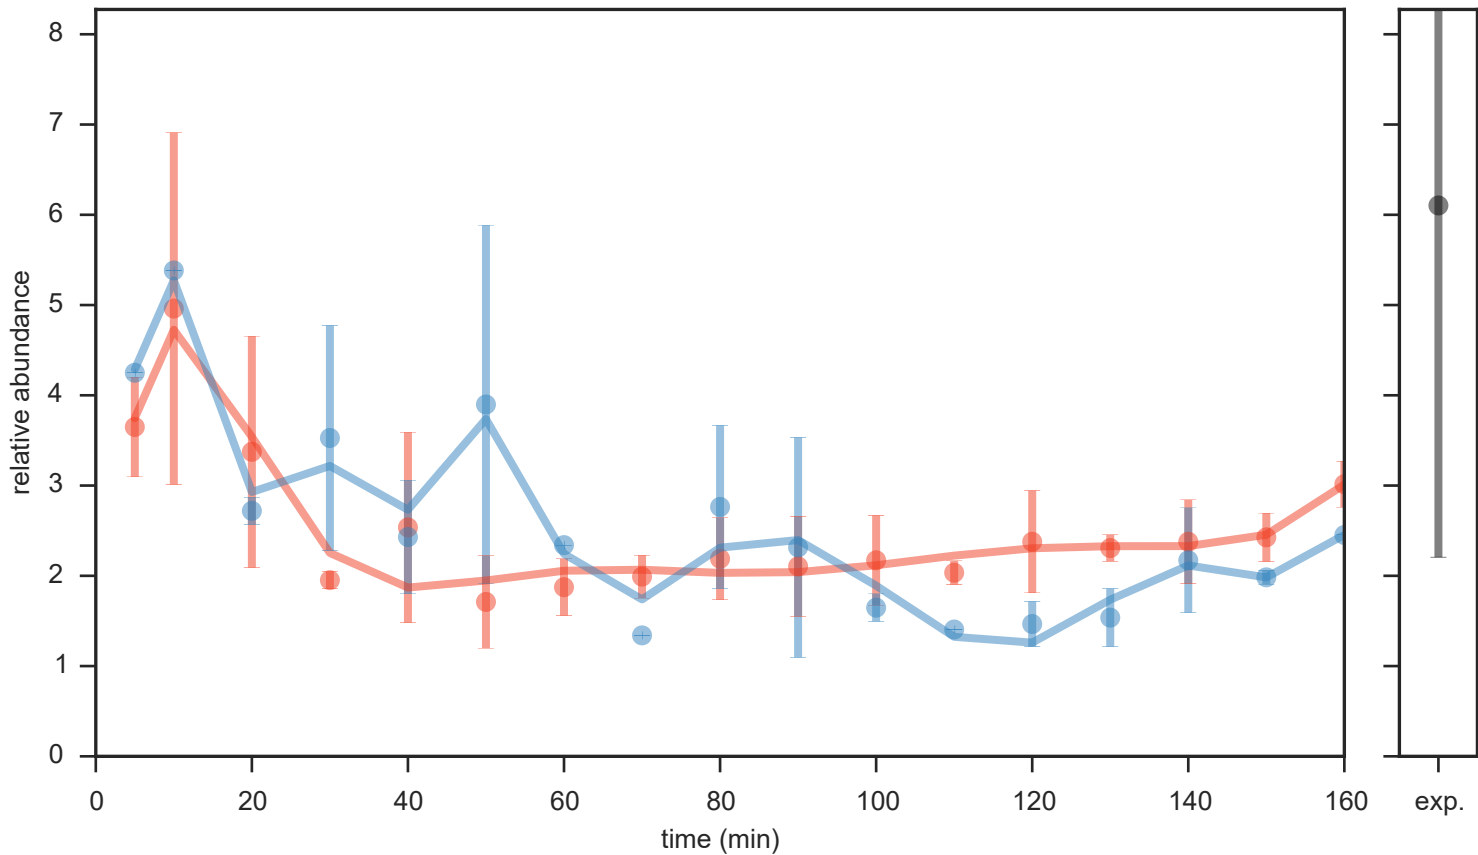

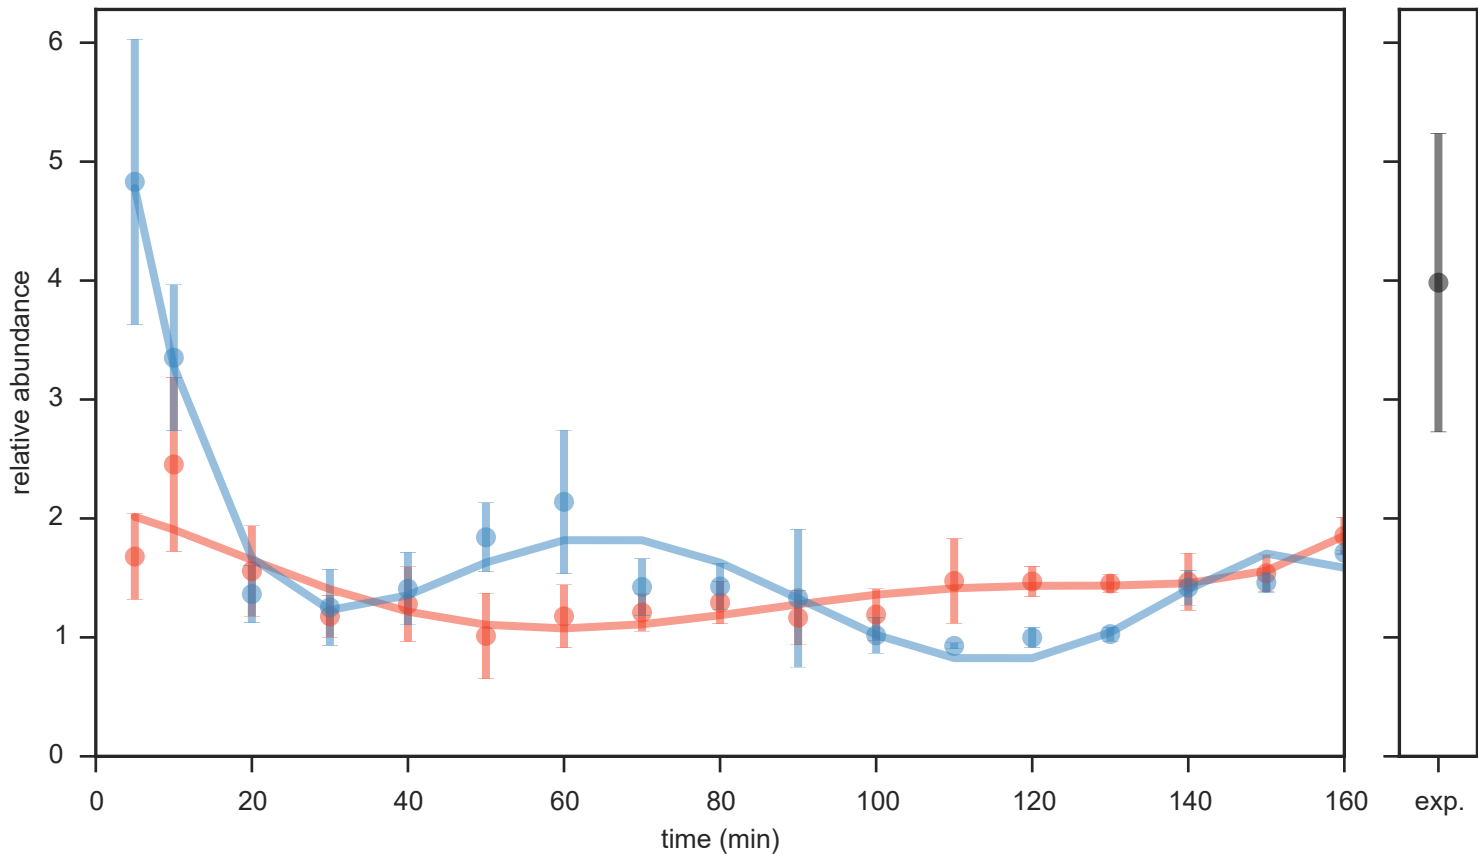

idms\_pid1505\_mz364.94

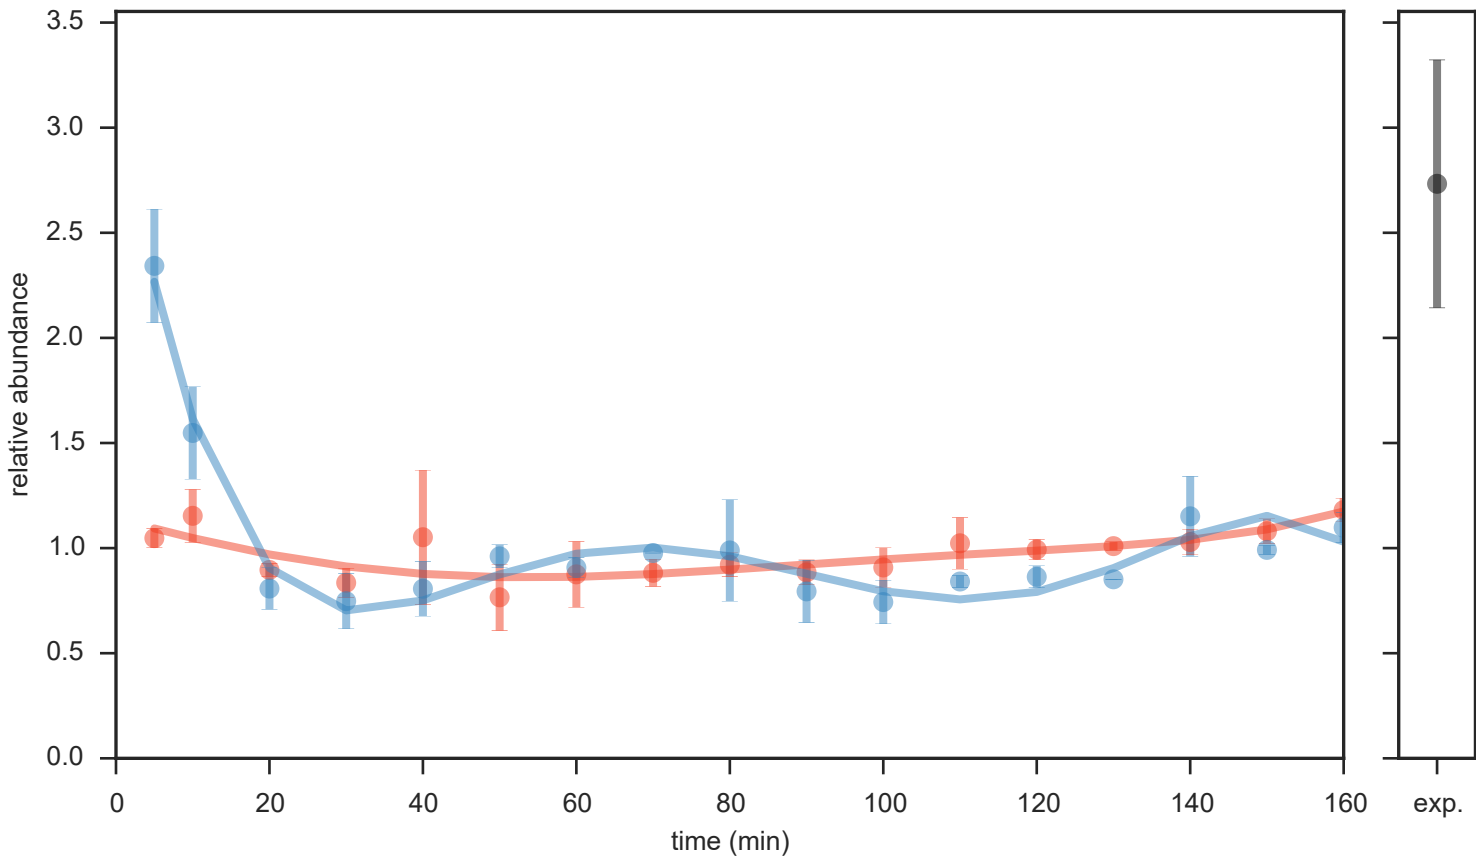

idms\_pid1530\_mz183.00

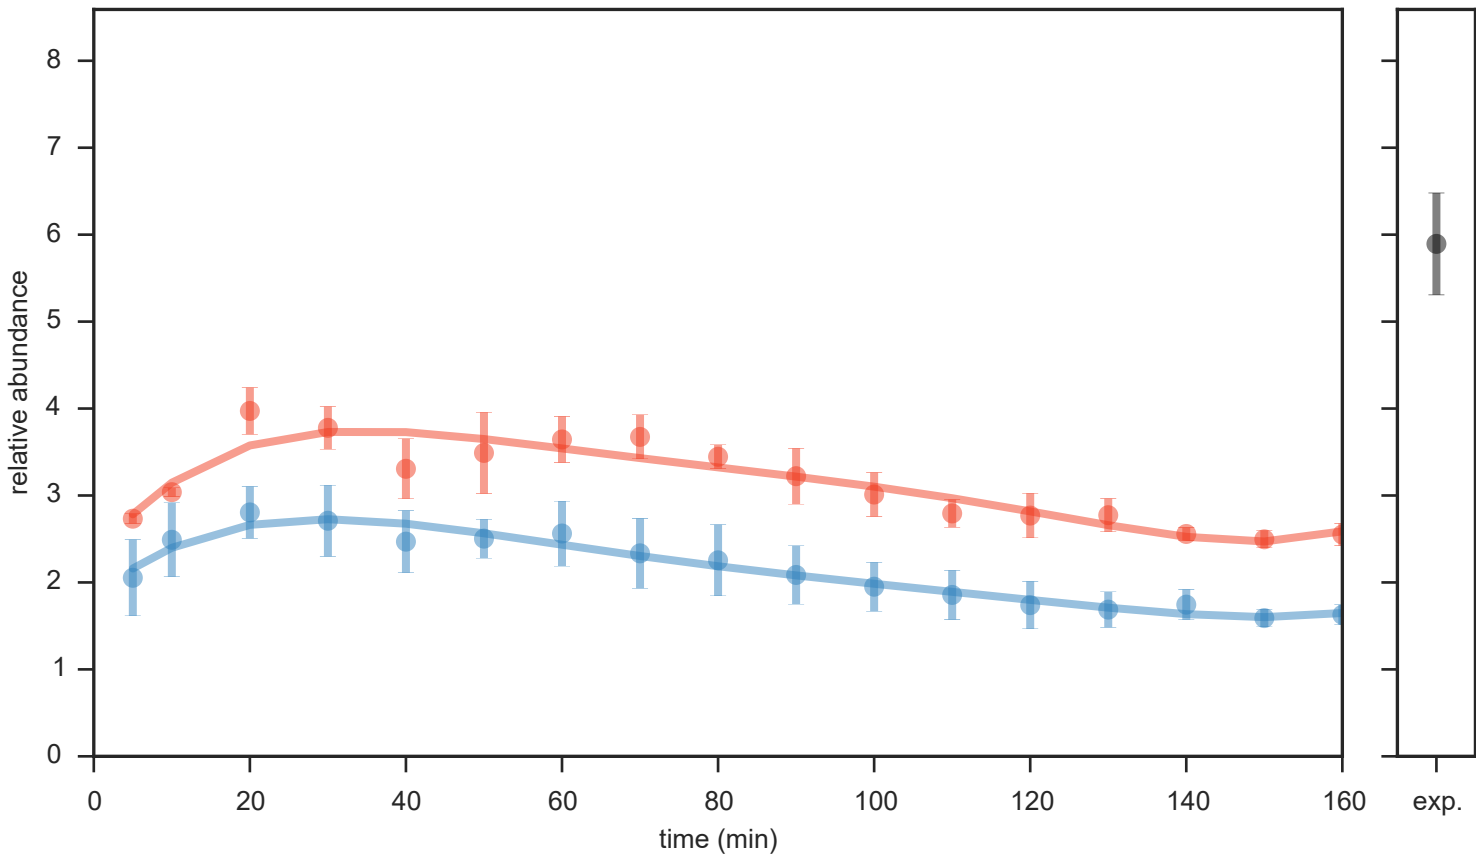

idms\_pid1542\_mz426.02

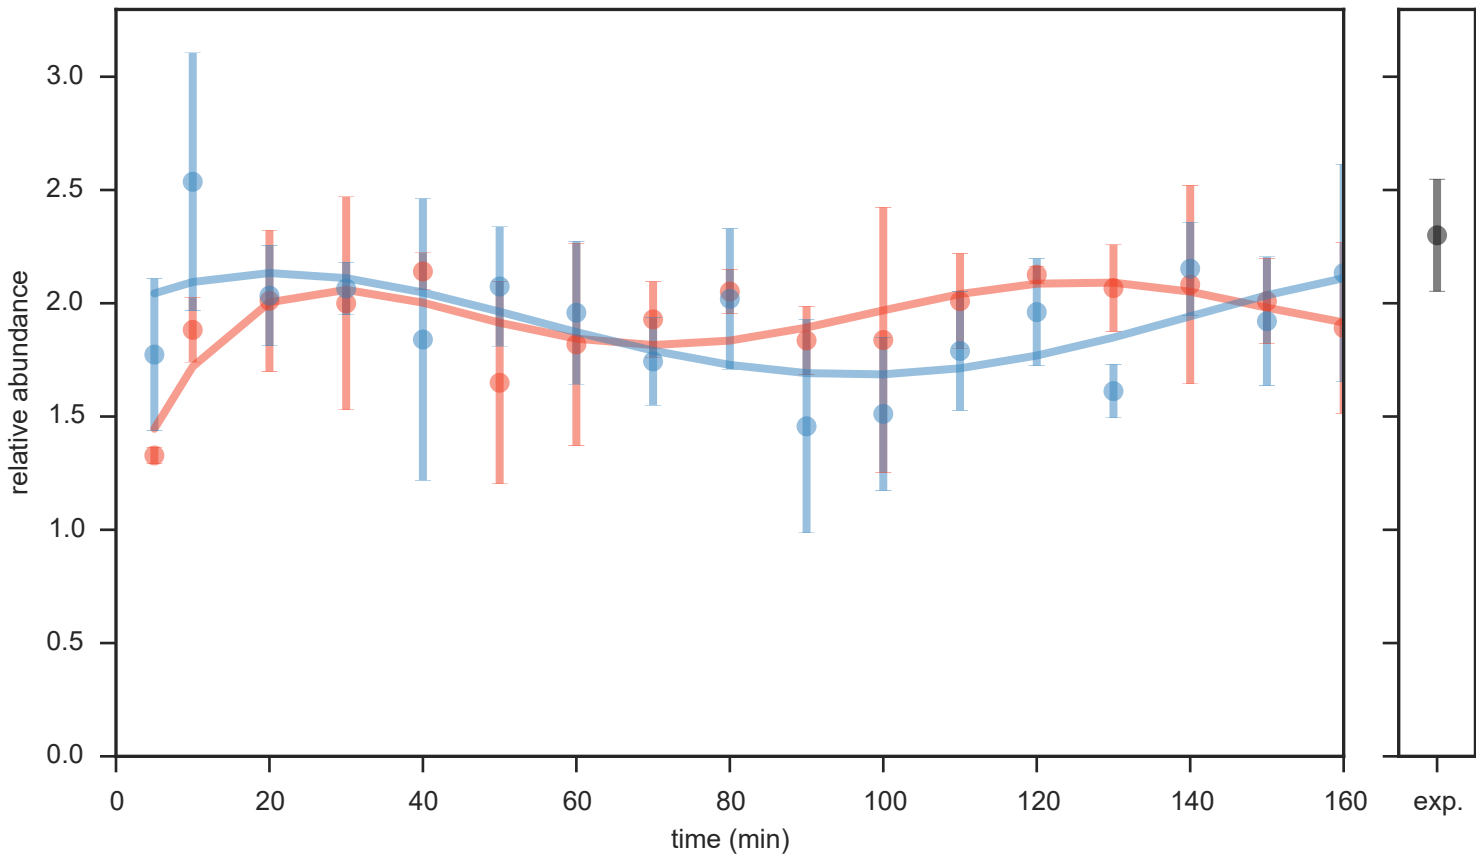

idms\_pid1558\_mz282.95

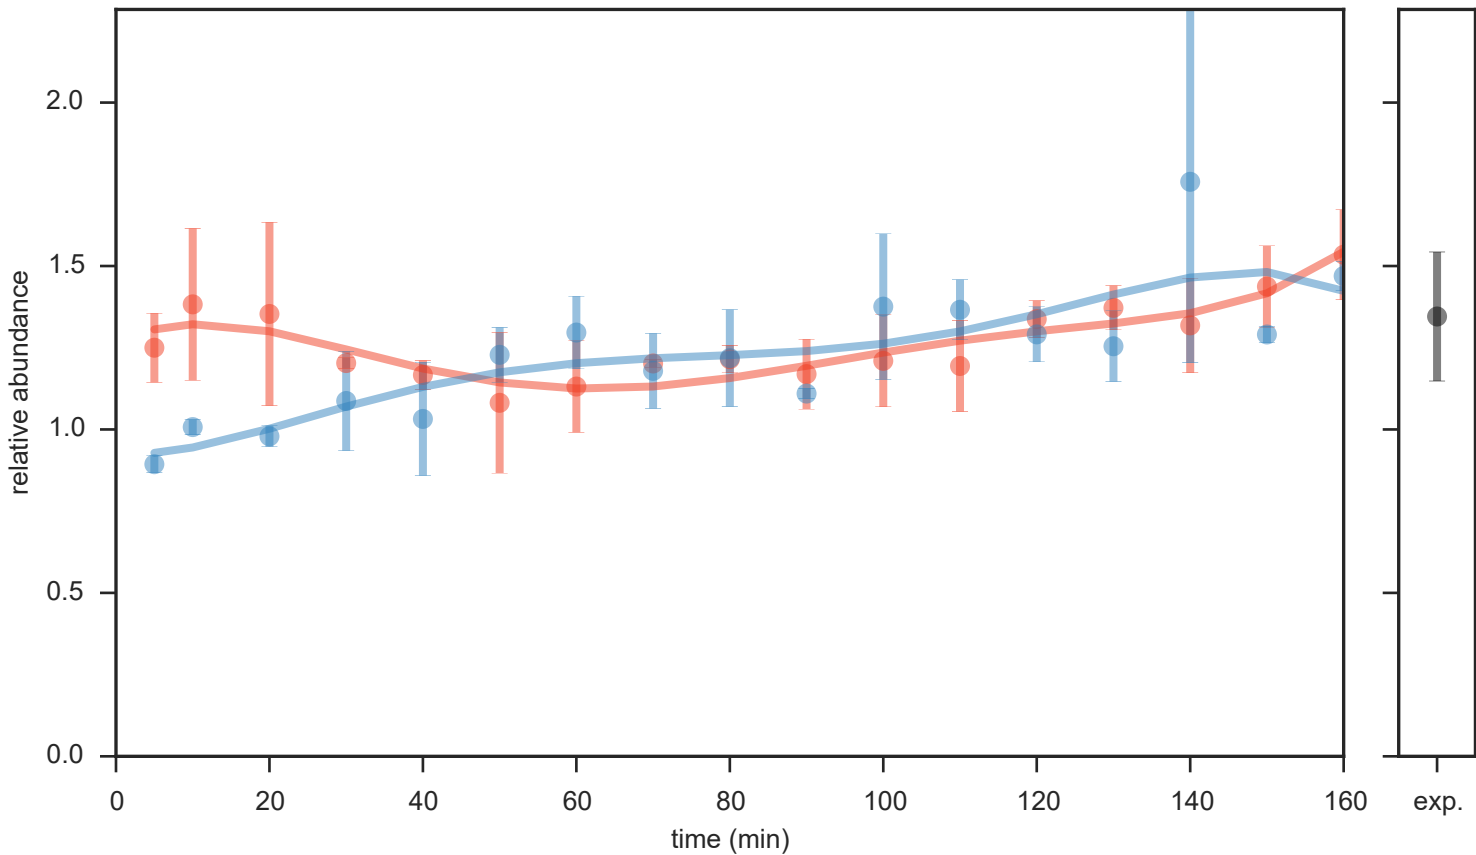

idms\_pid1560\_mz274.03

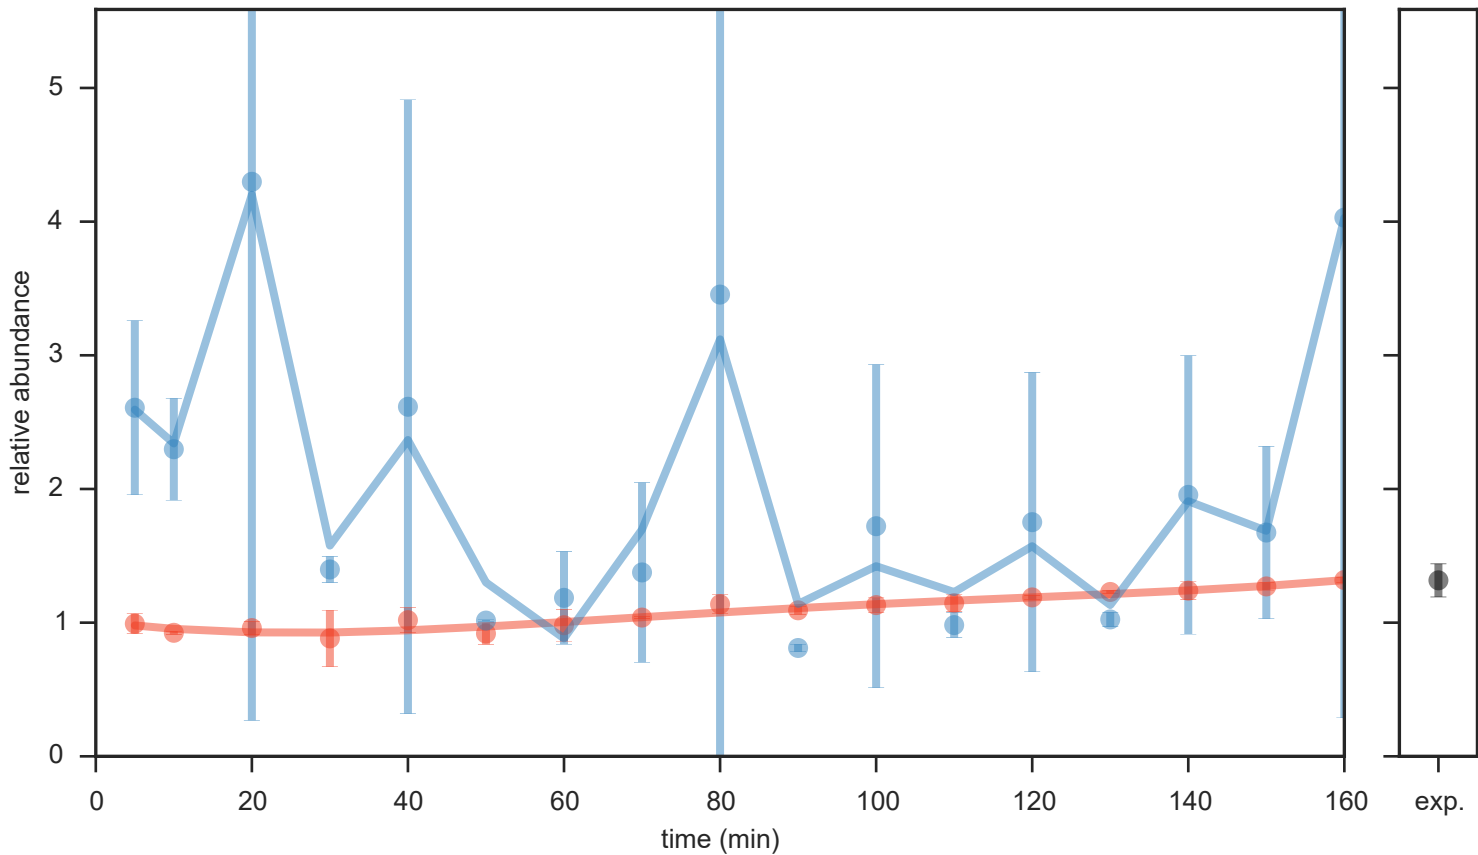

idms\_pid1563\_mz393.66

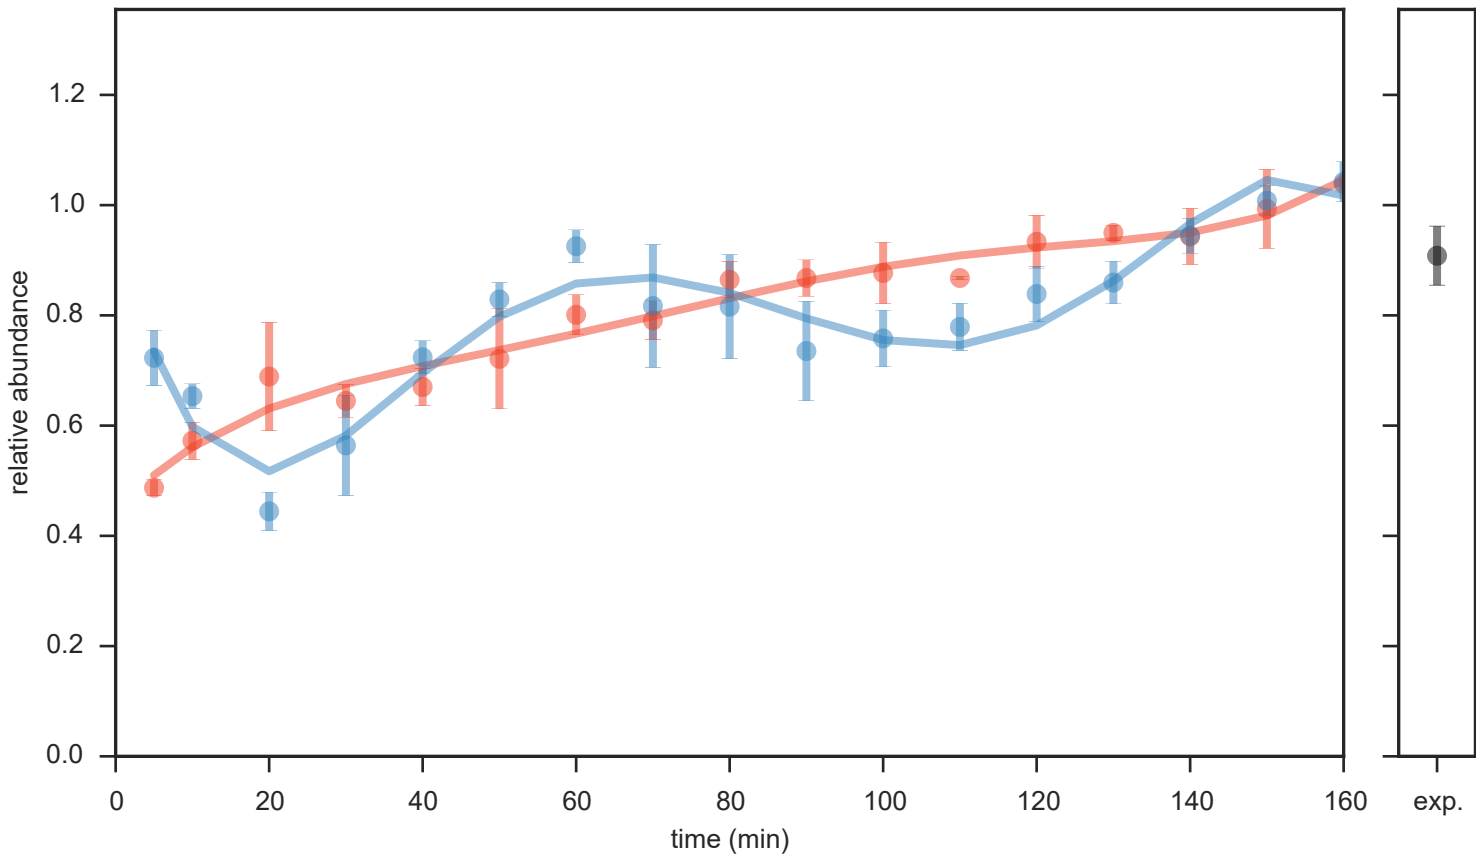



idms\_pid1577\_mz304.94

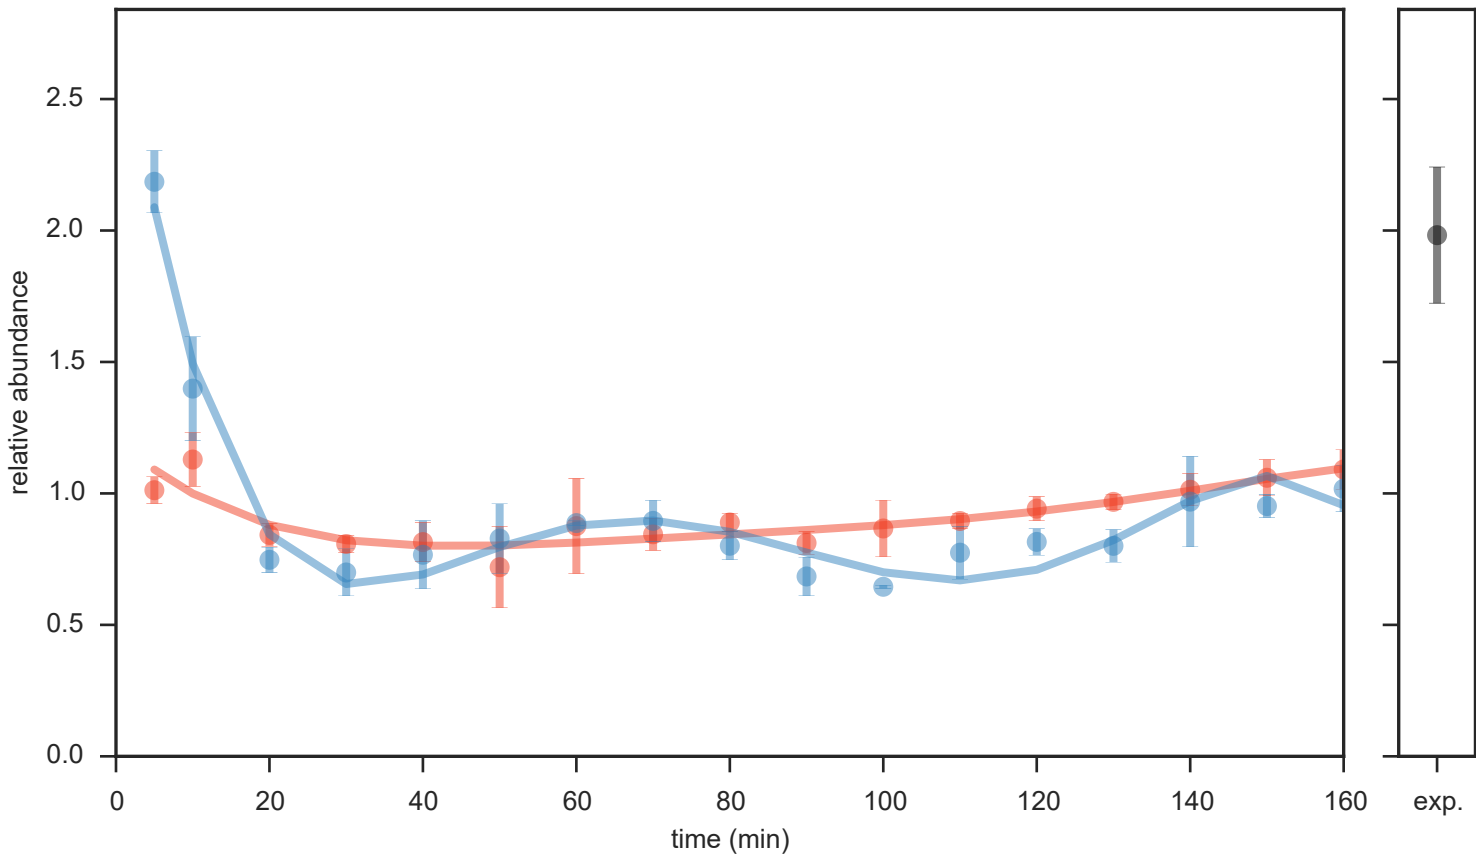

idms\_pid1578\_mz221.04

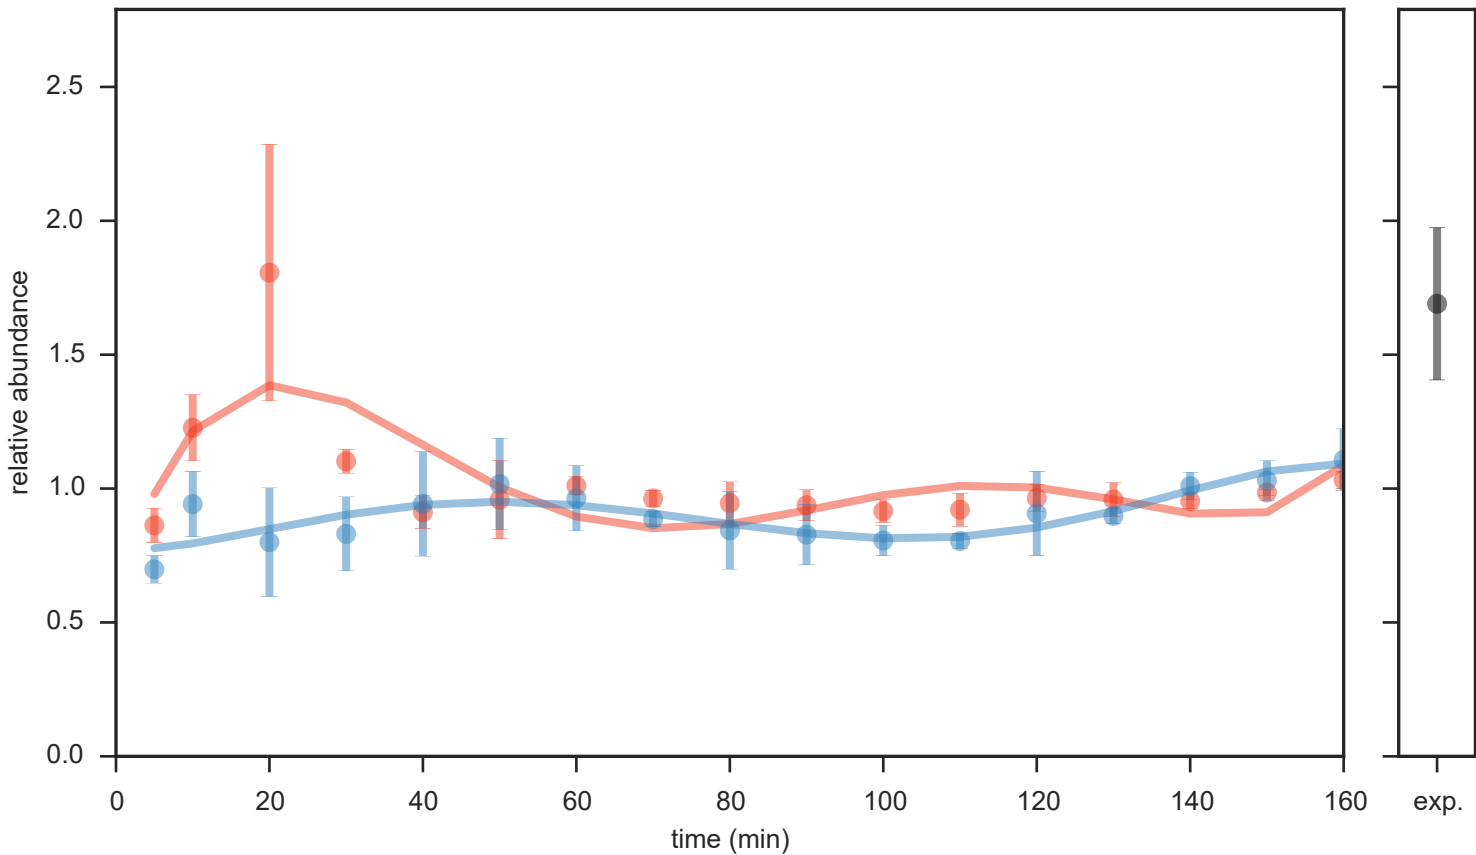

idms\_pid1616\_mz322.04

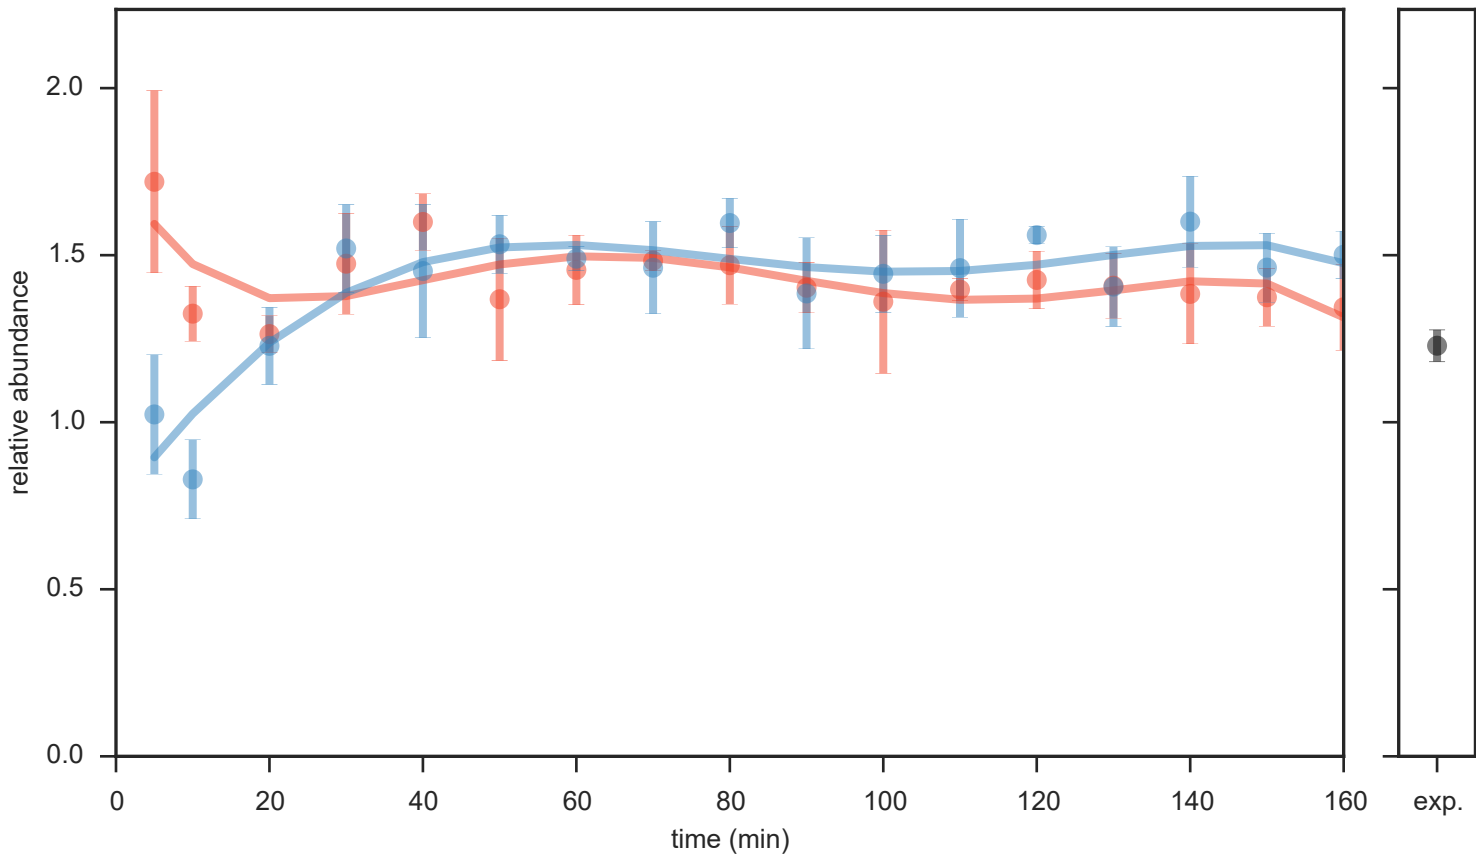

idms\_pid1654\_mz254.69

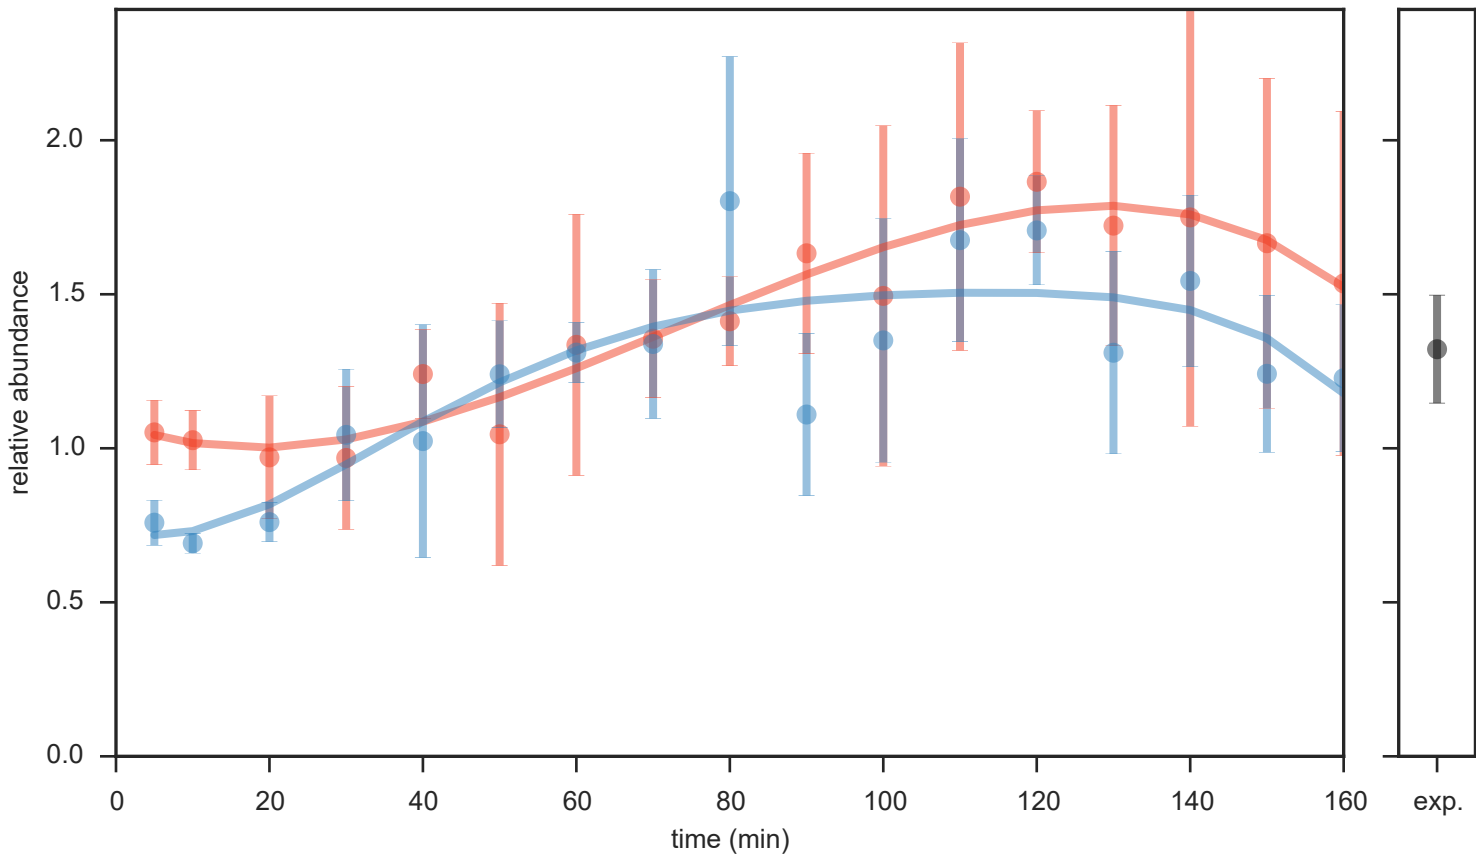

idms\_pid1765\_mz416.55

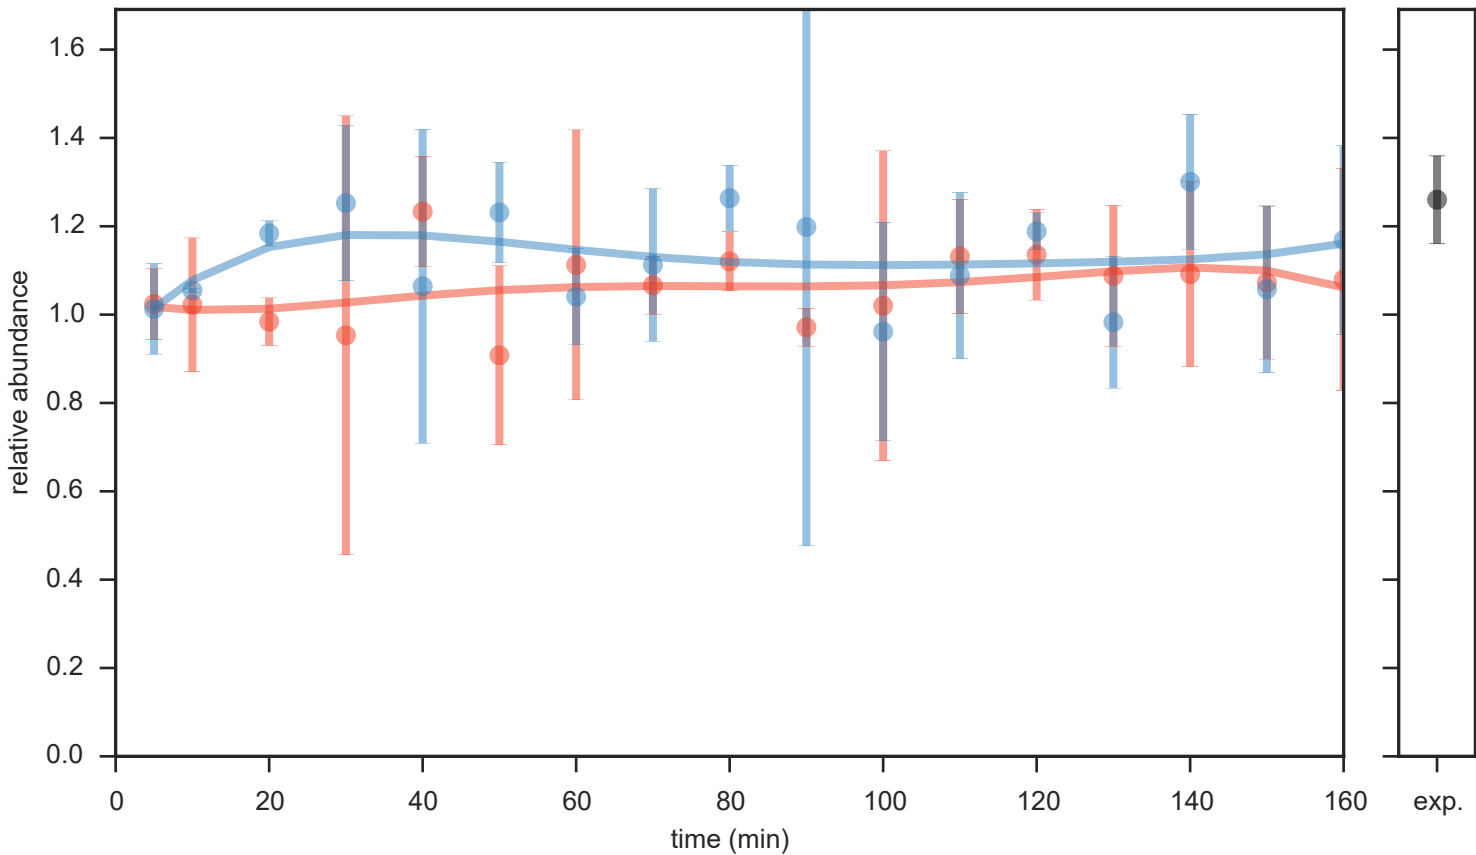

idms\_pid1804\_mz126.00

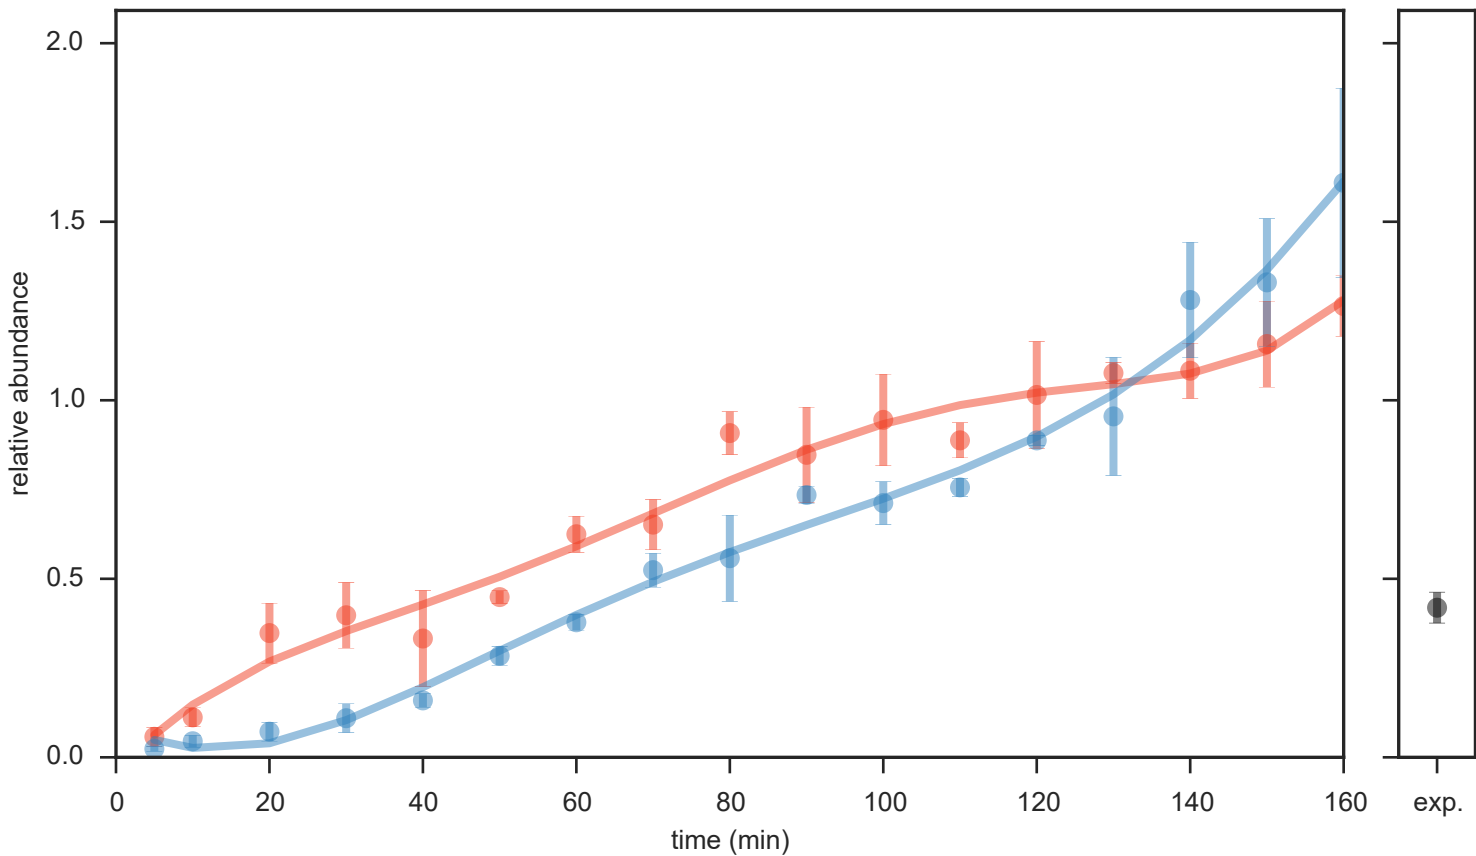

idms\_pid1826\_mz226.43

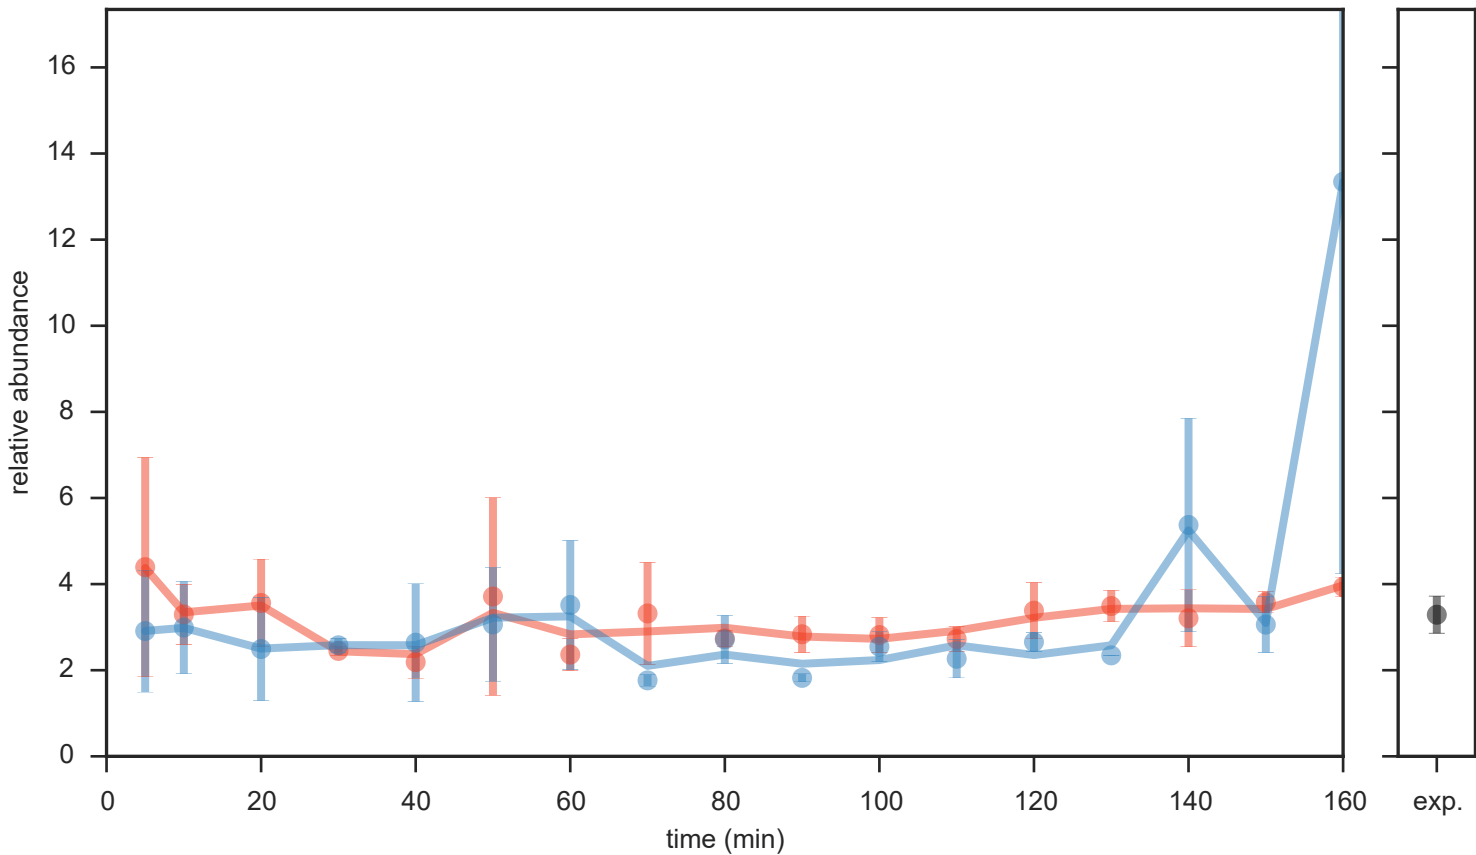

idms\_pid1852\_mz171.00

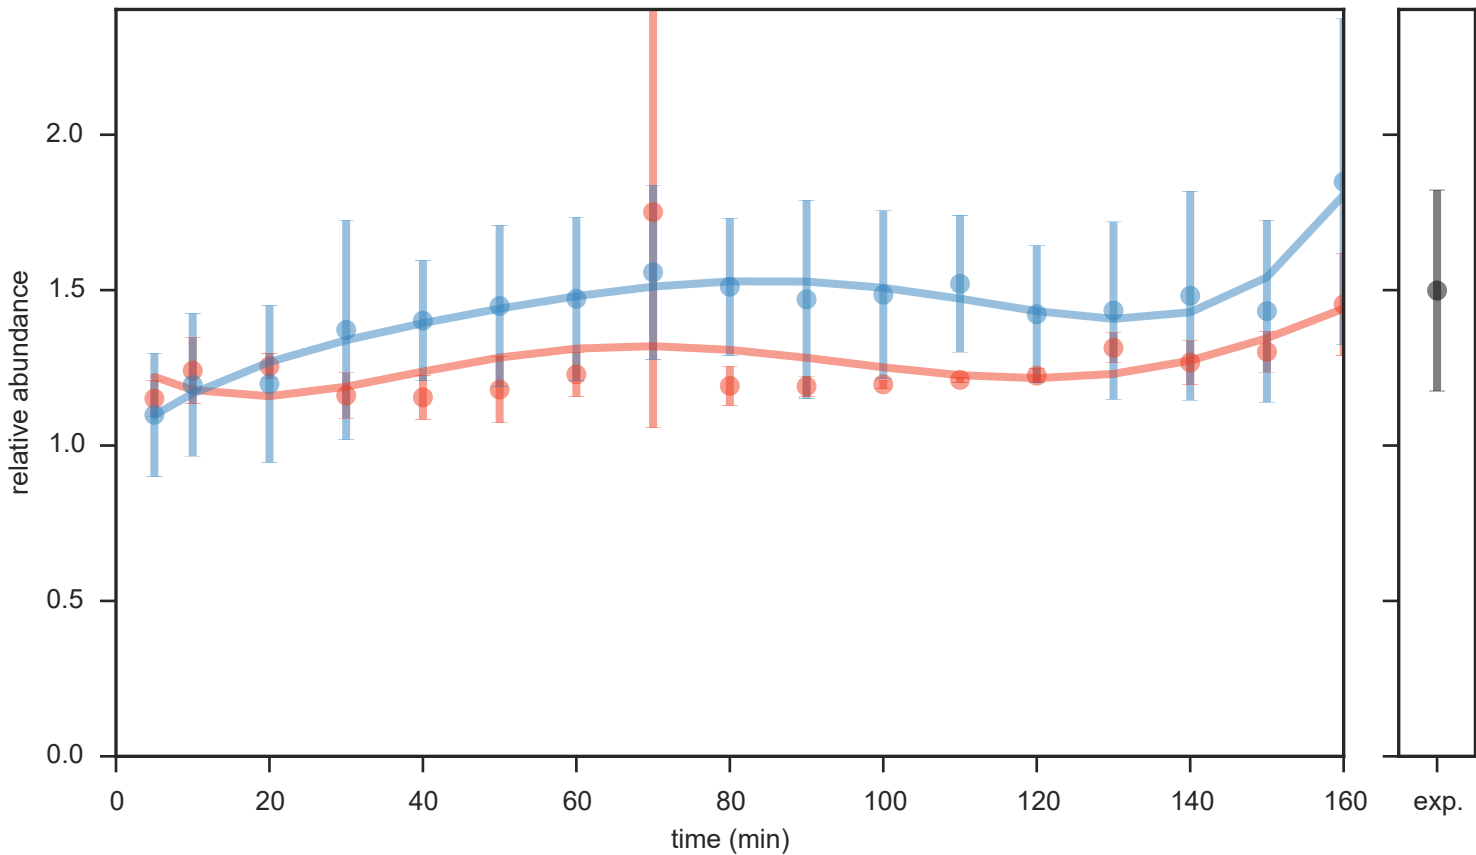



idms\_pid1854\_mz186.51

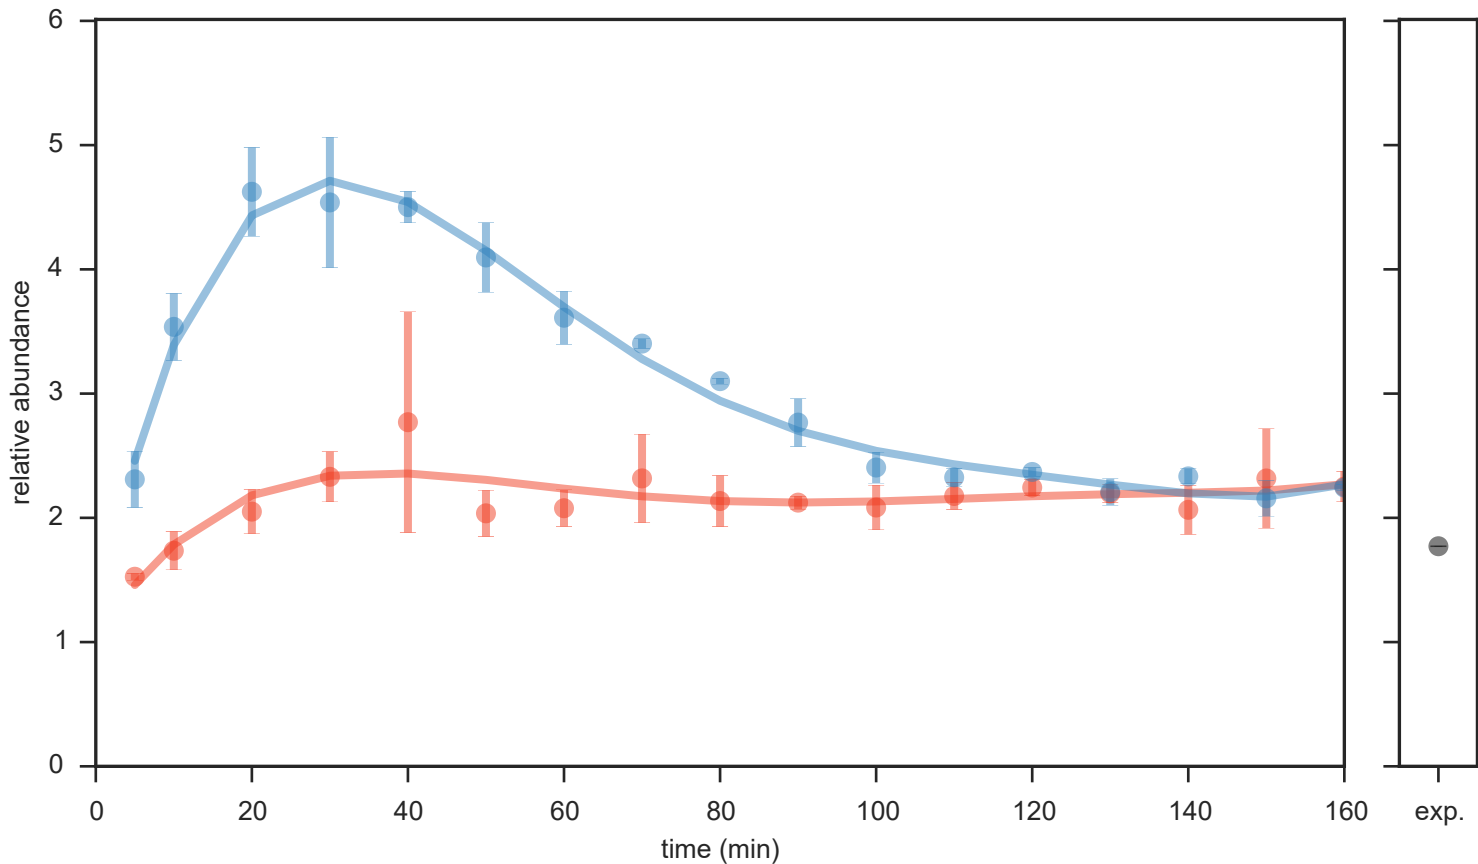

idms\_pid1870\_mz322.04

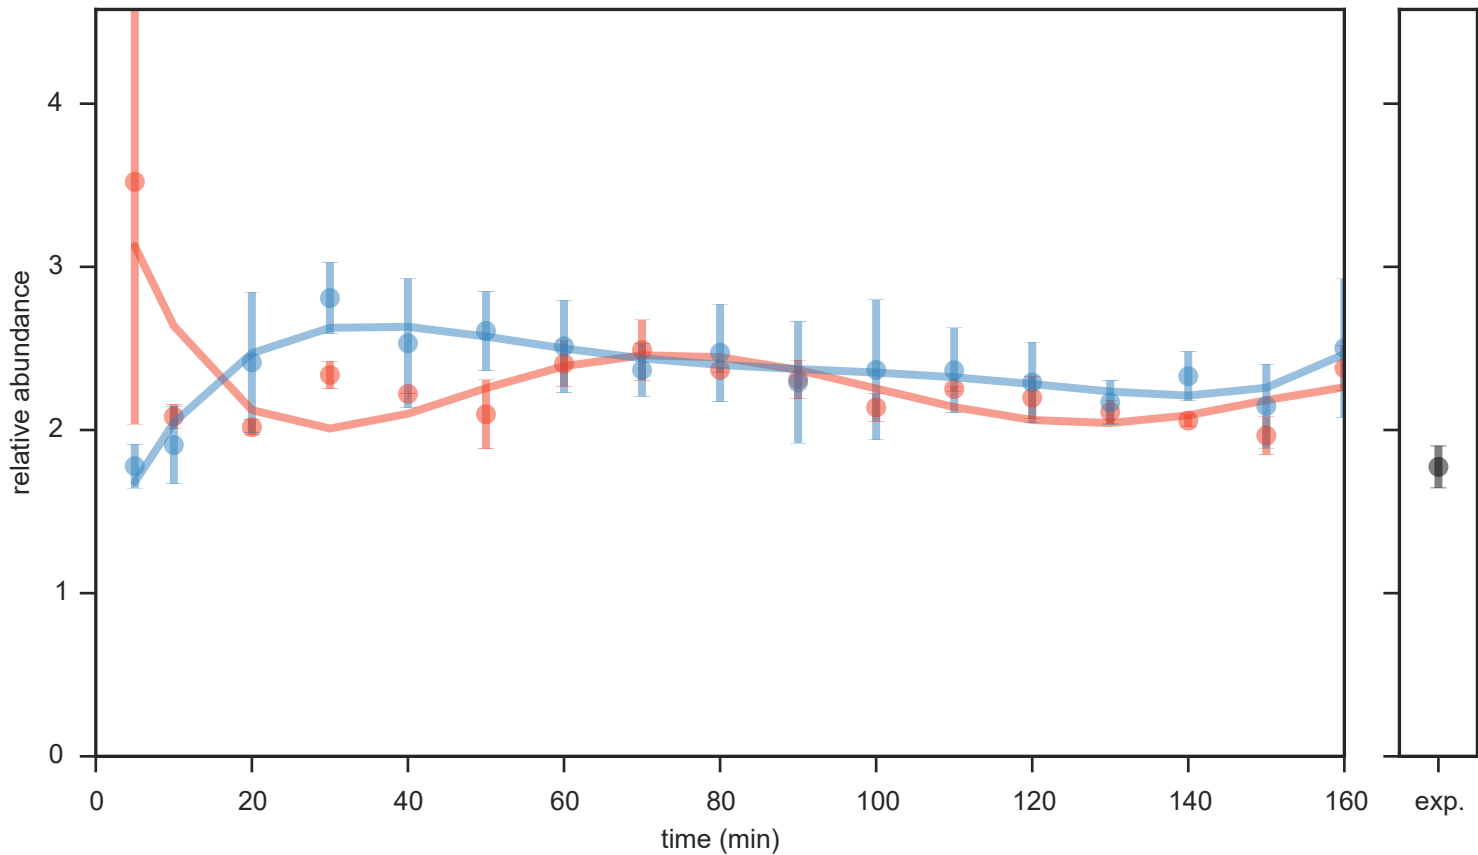

idms\_pid1871\_mz133.04

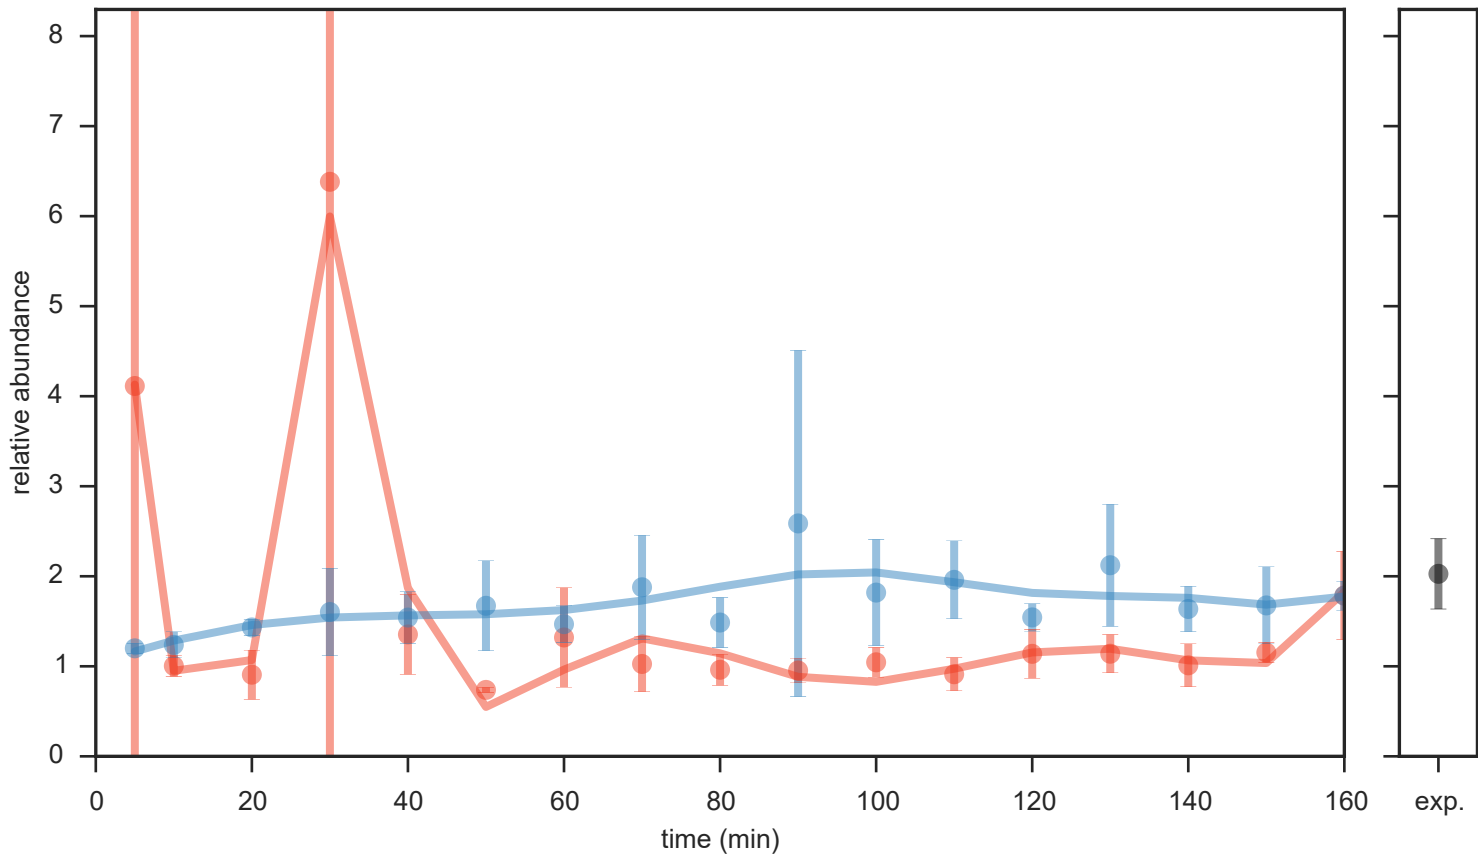

idms\_pid1900\_mz276.55

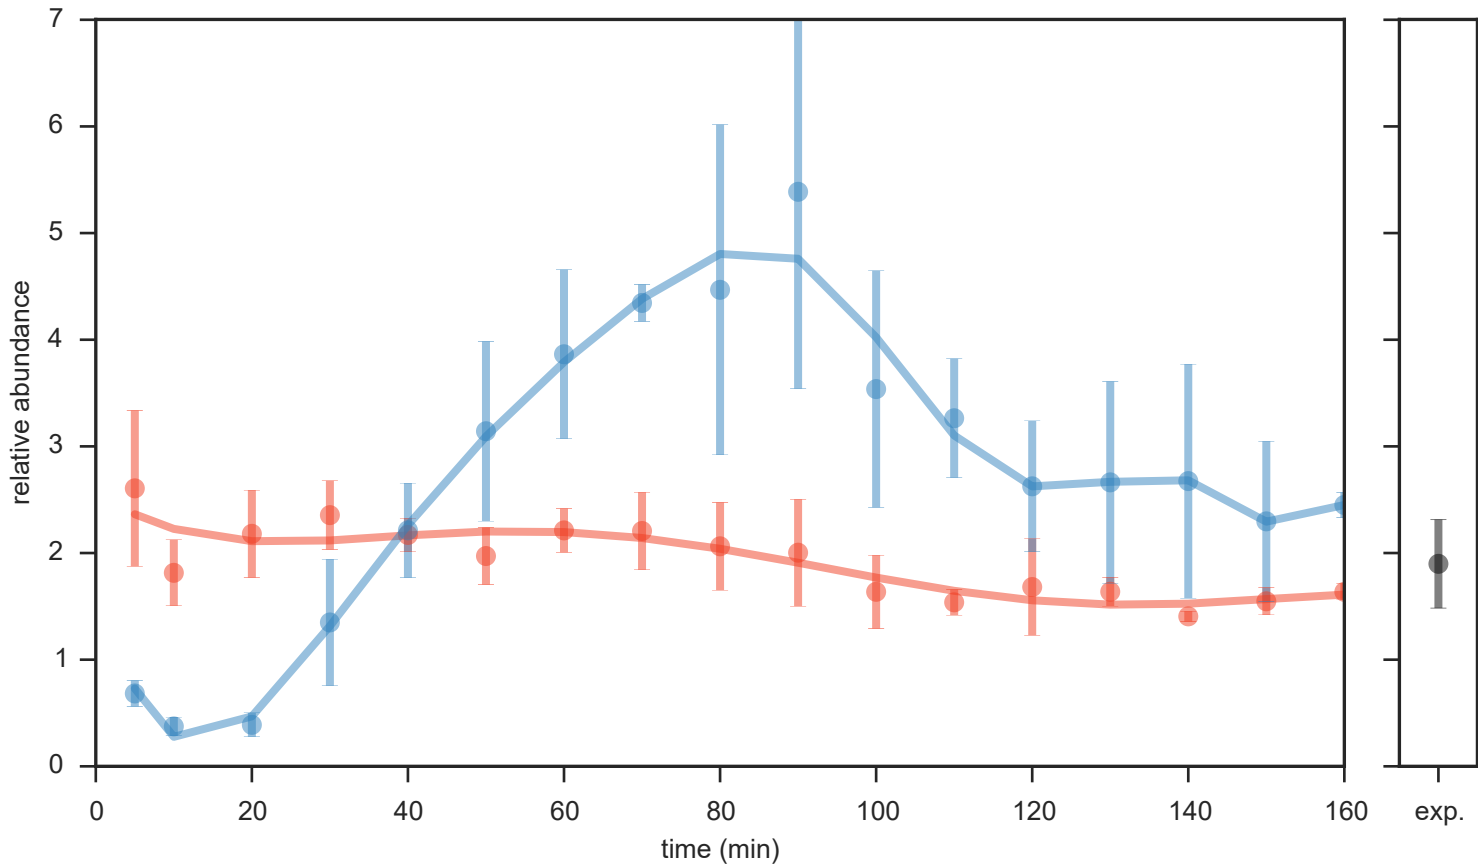

idms\_pid2003\_mz382.43

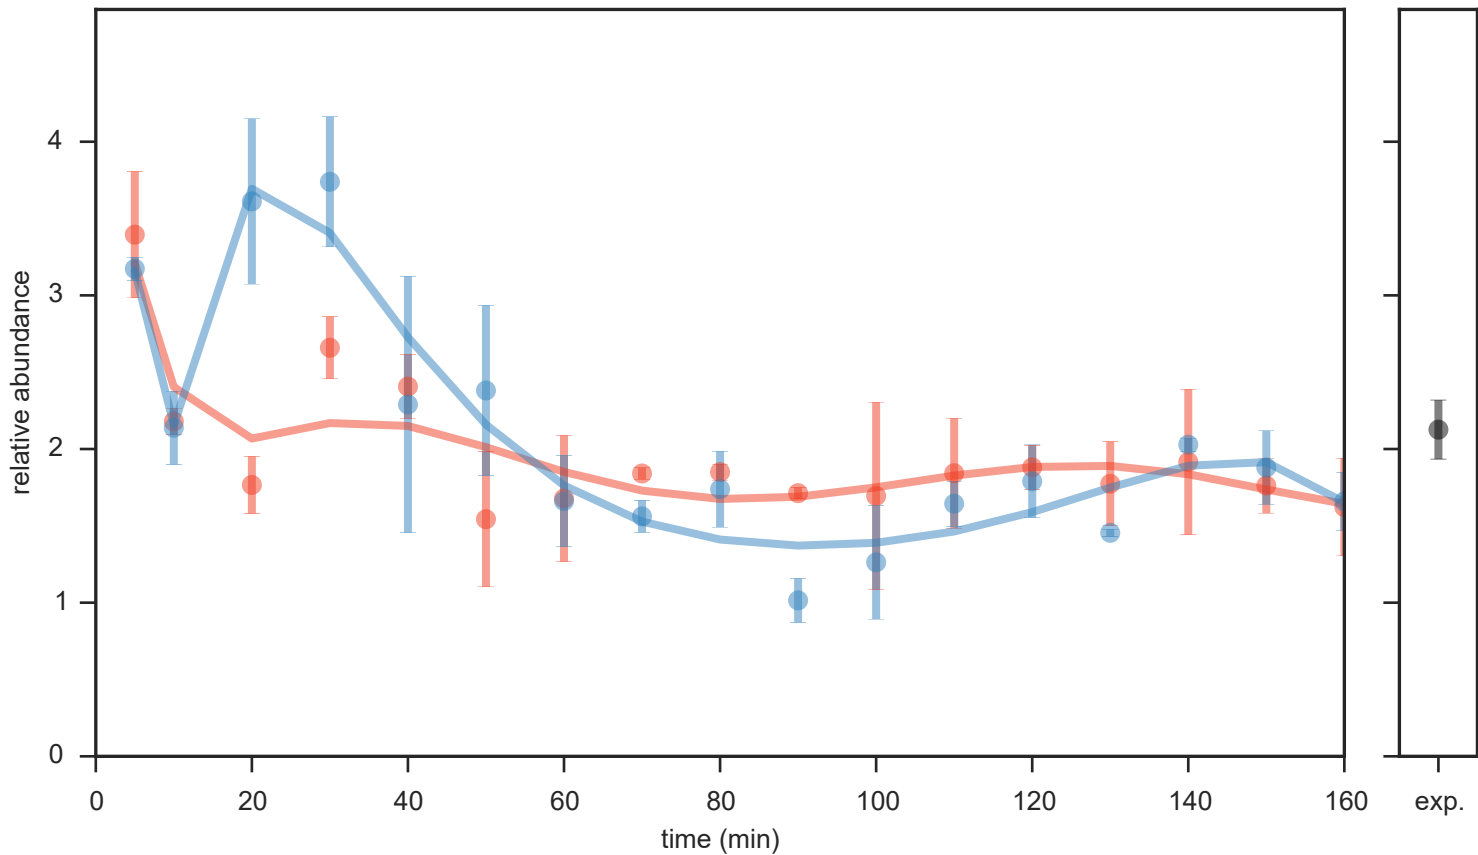

idms\_pid2019\_mz410.02

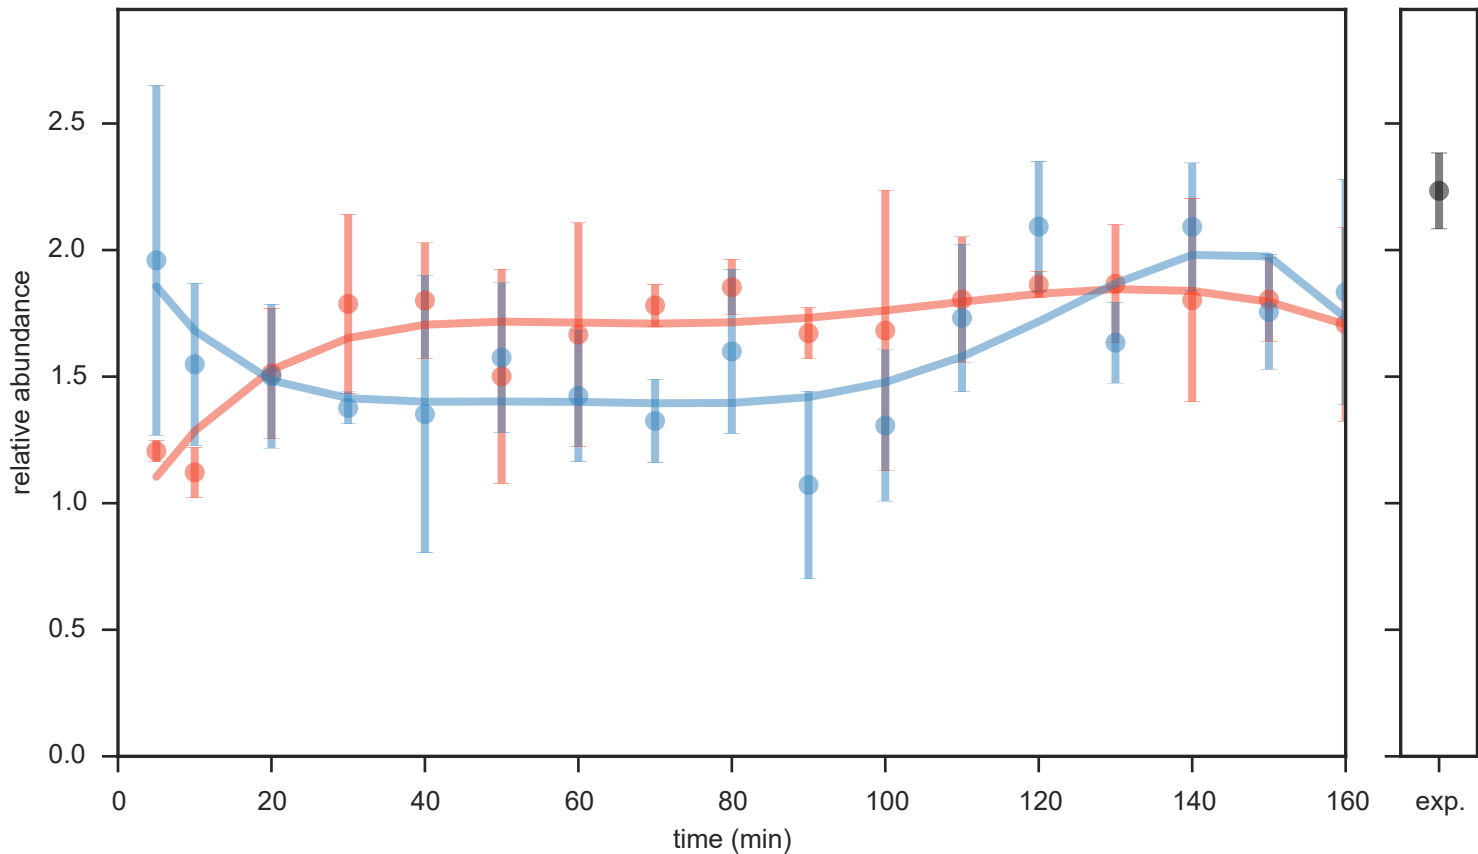

idms\_pid2068\_mz275.08

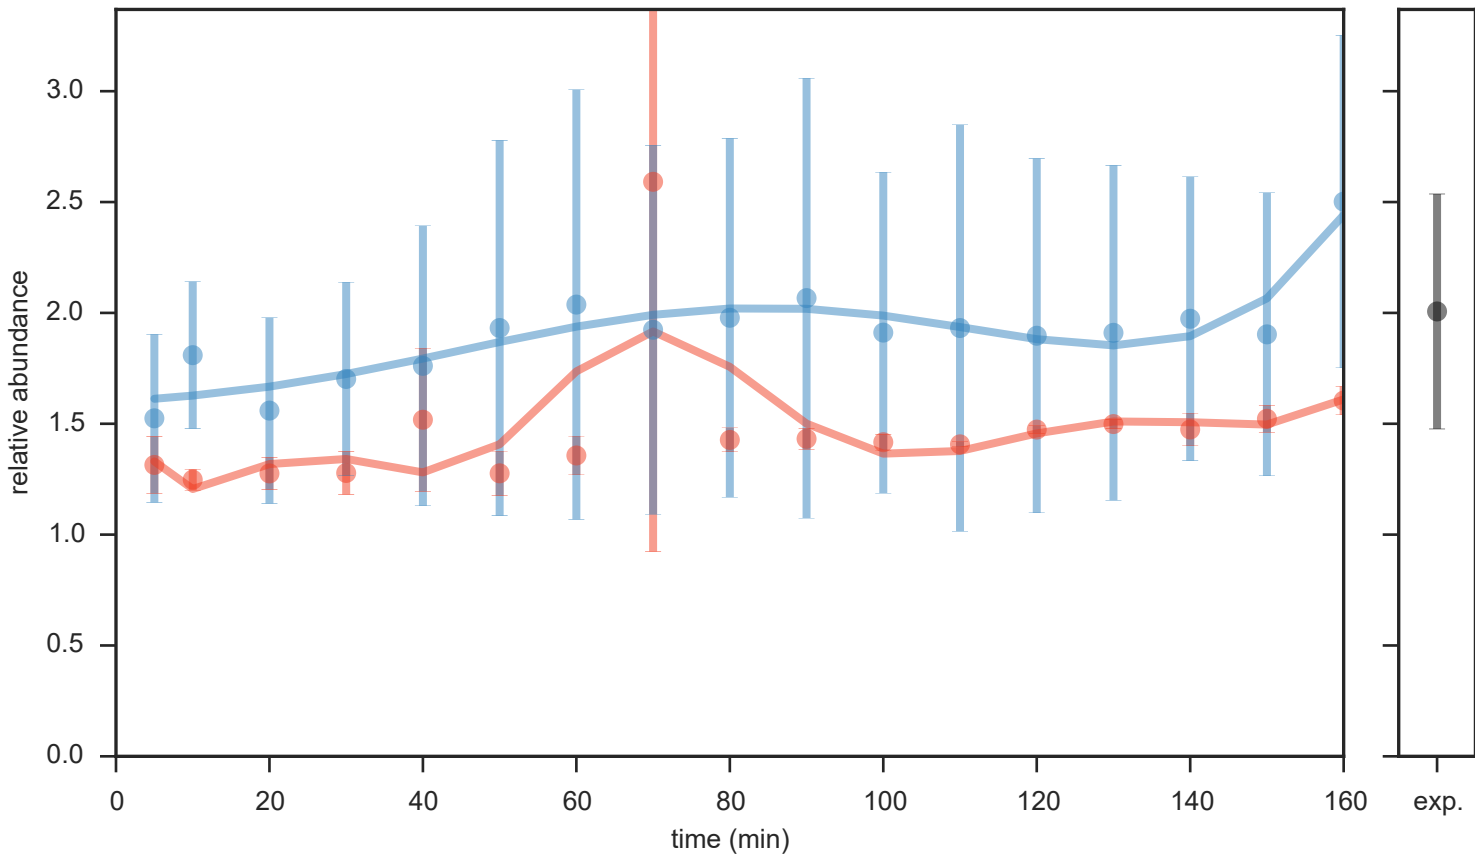

idms\_pid2122\_mz254.69

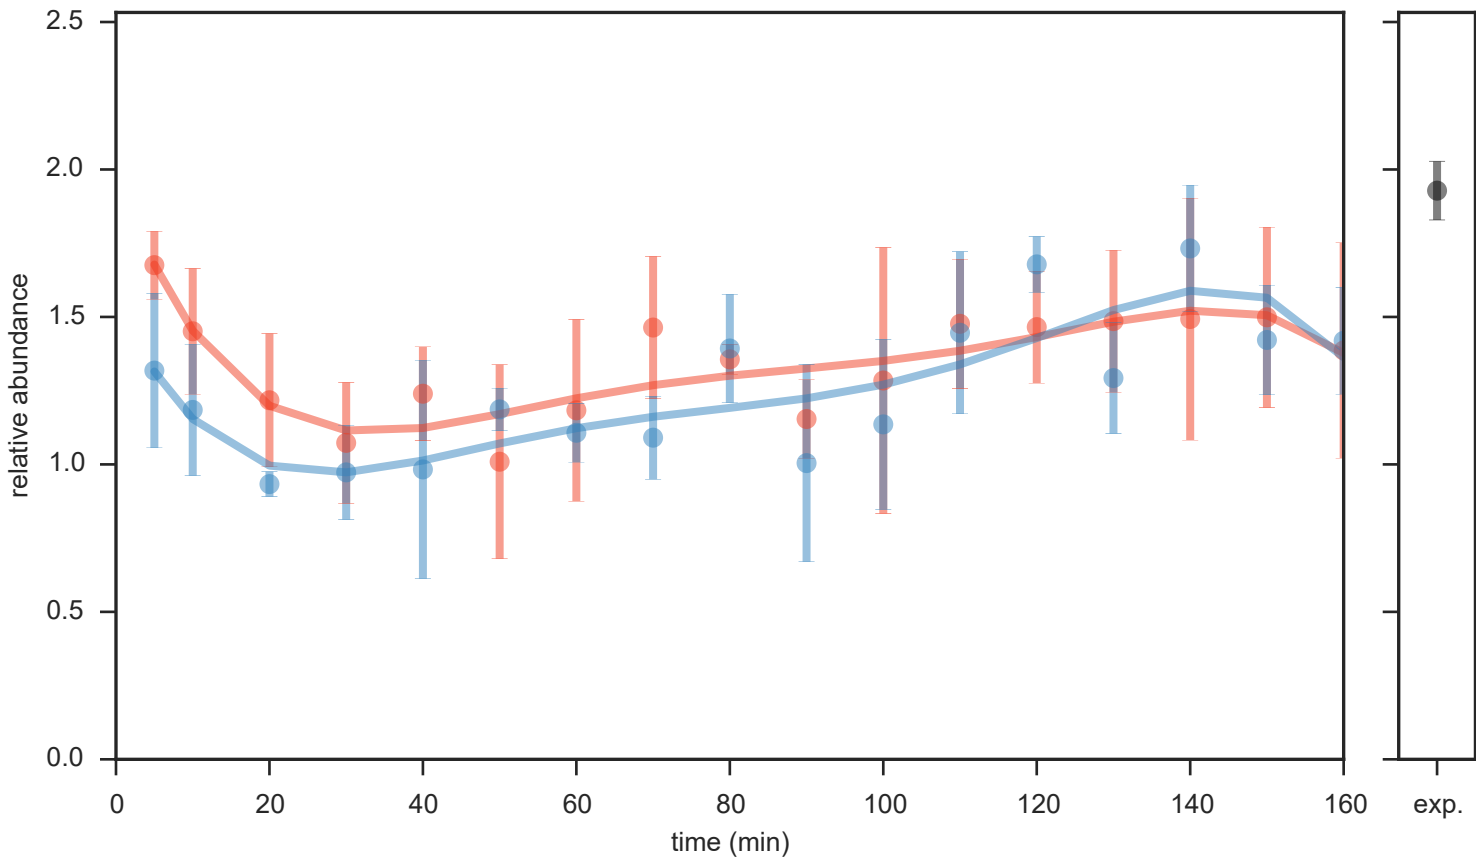



idms\_pid2130\_mz152.53

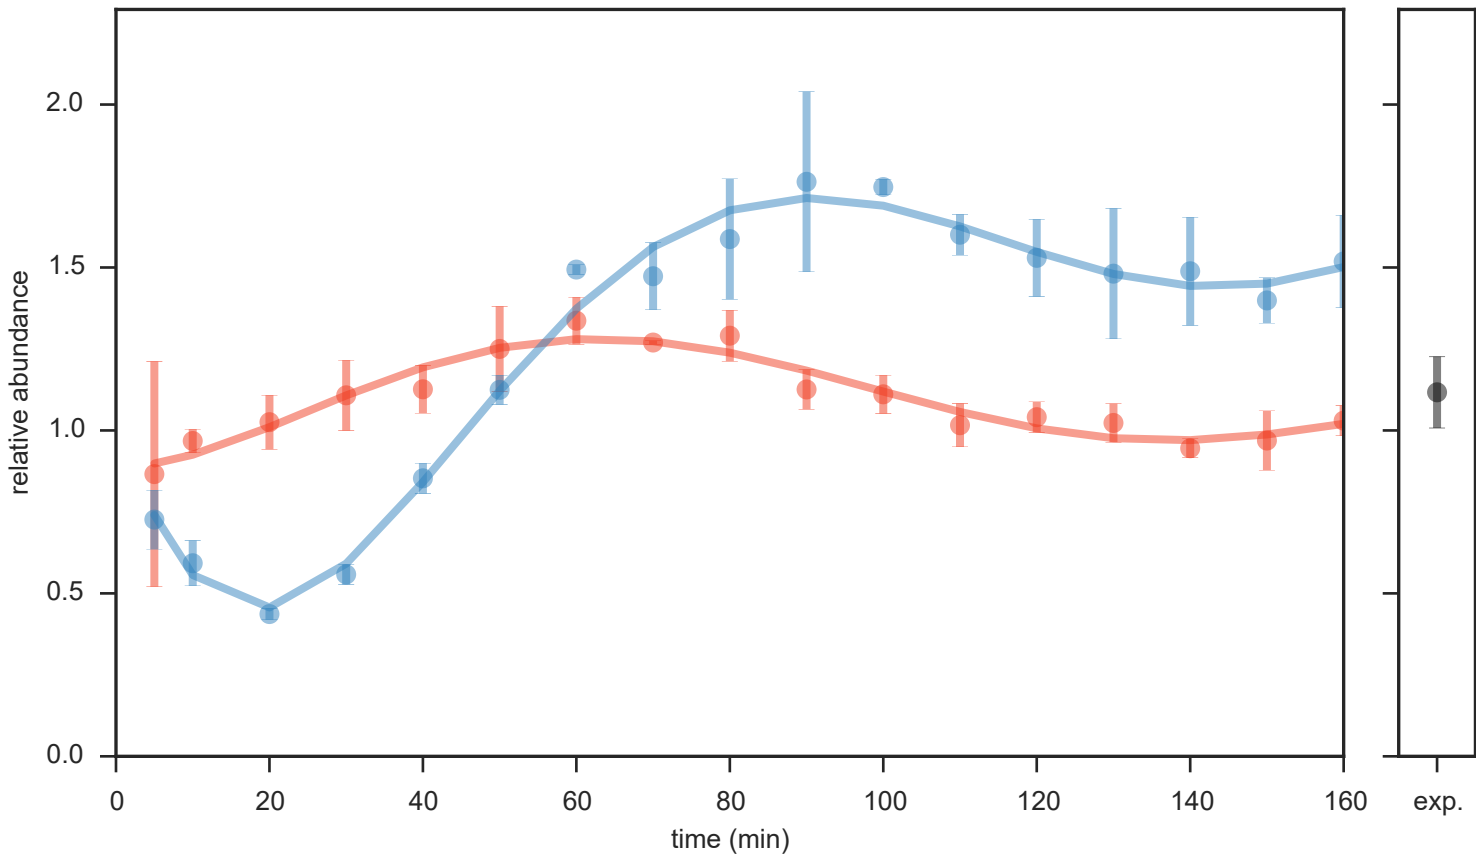

idms\_pid2140\_mz168.52

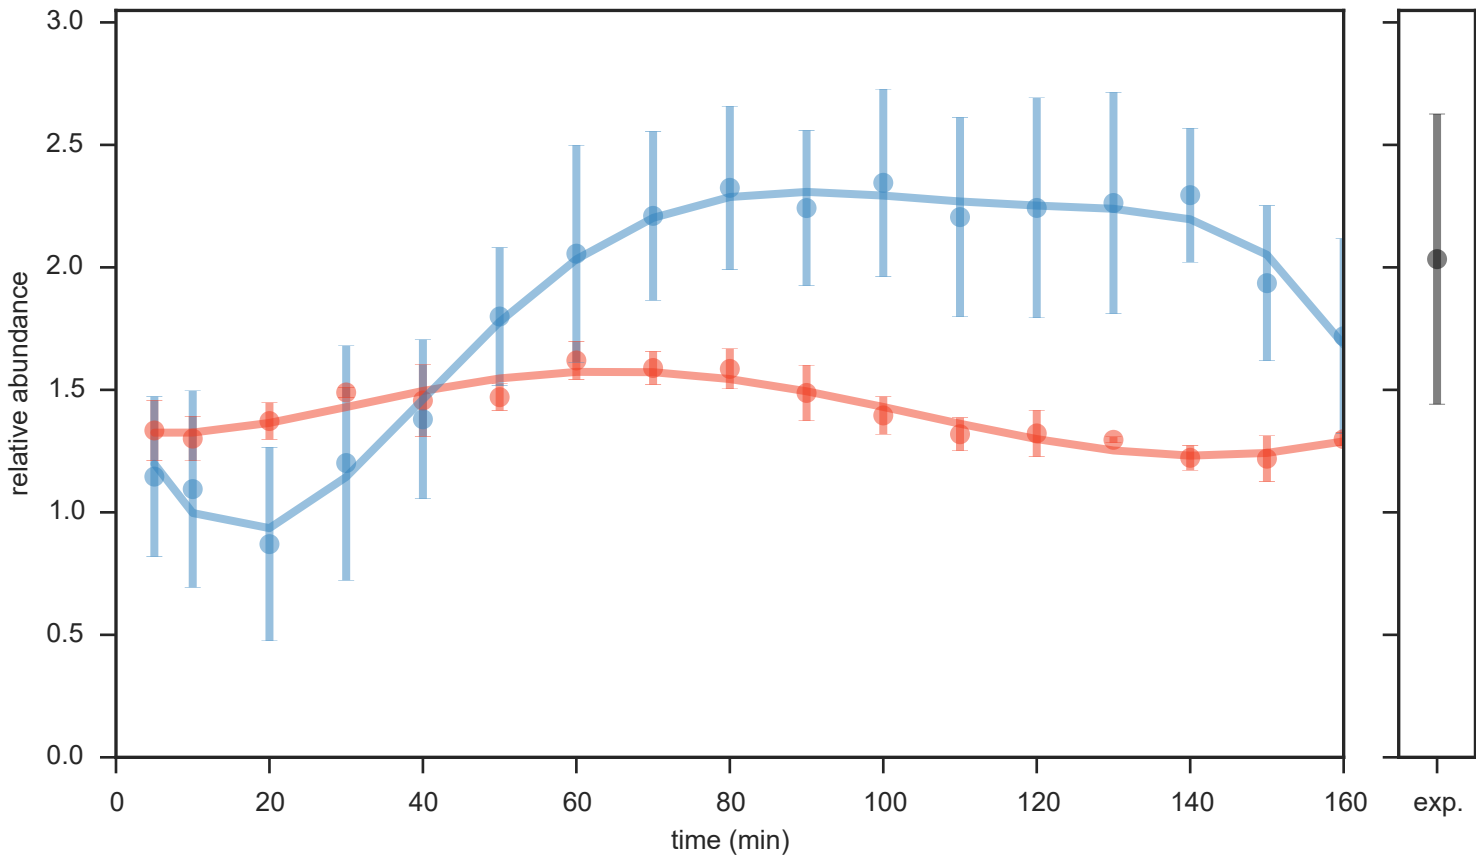

idms\_pid2161\_mz282.96

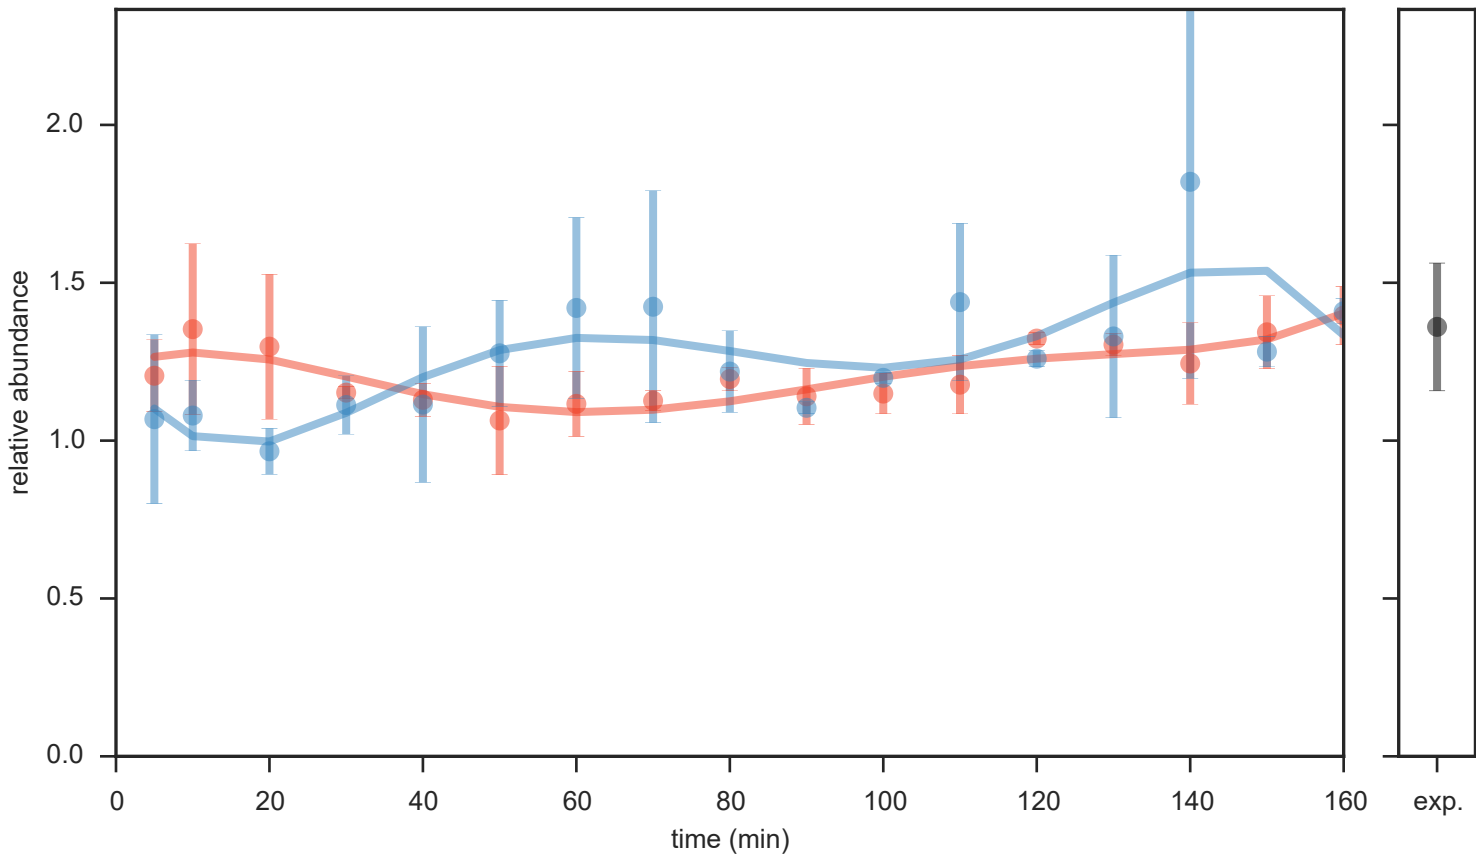

idms\_pid2294\_mz226.01

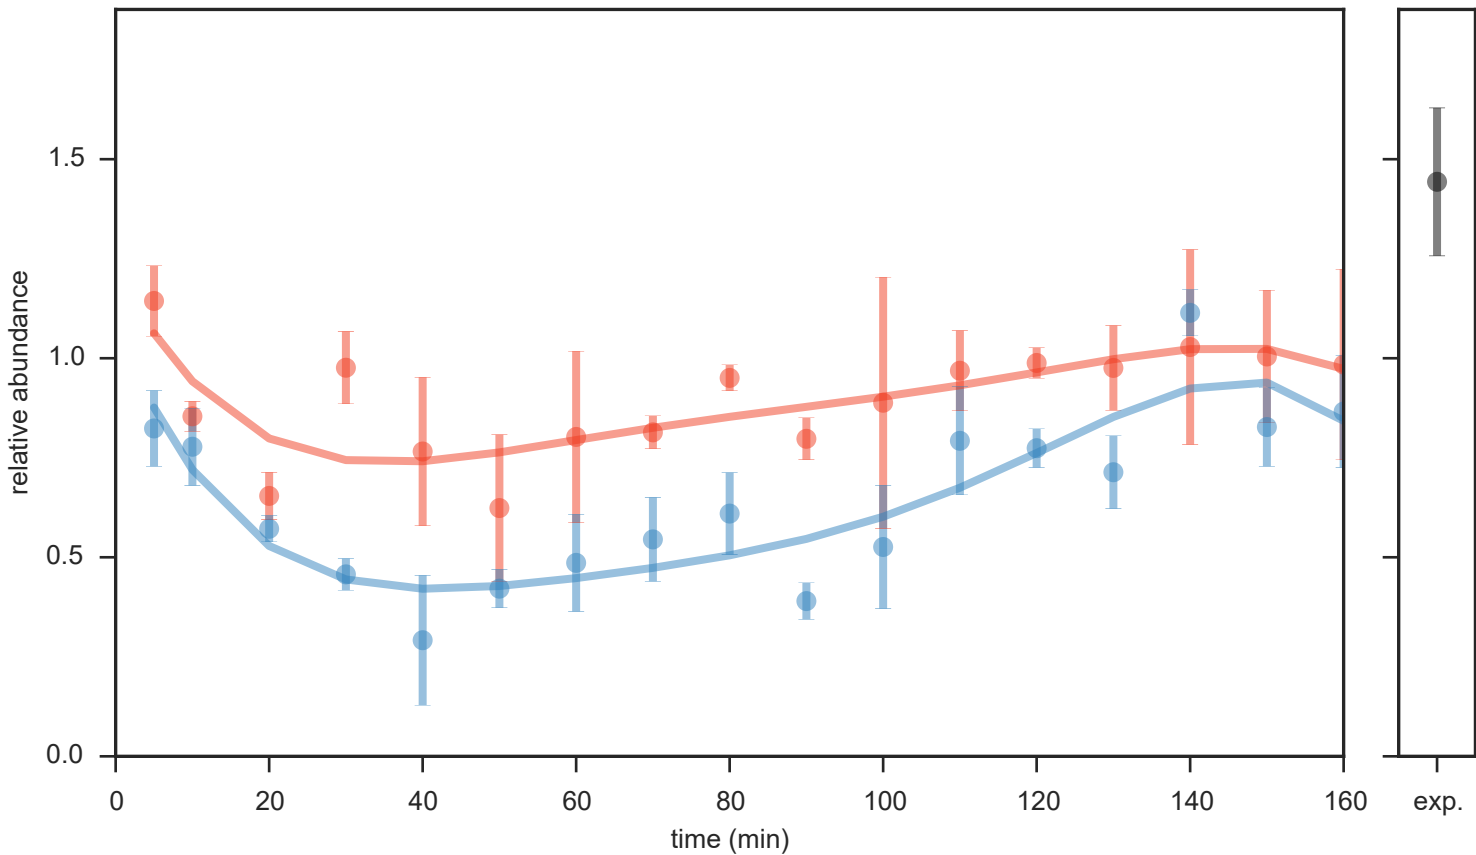

idms\_pid2407\_mz193.50

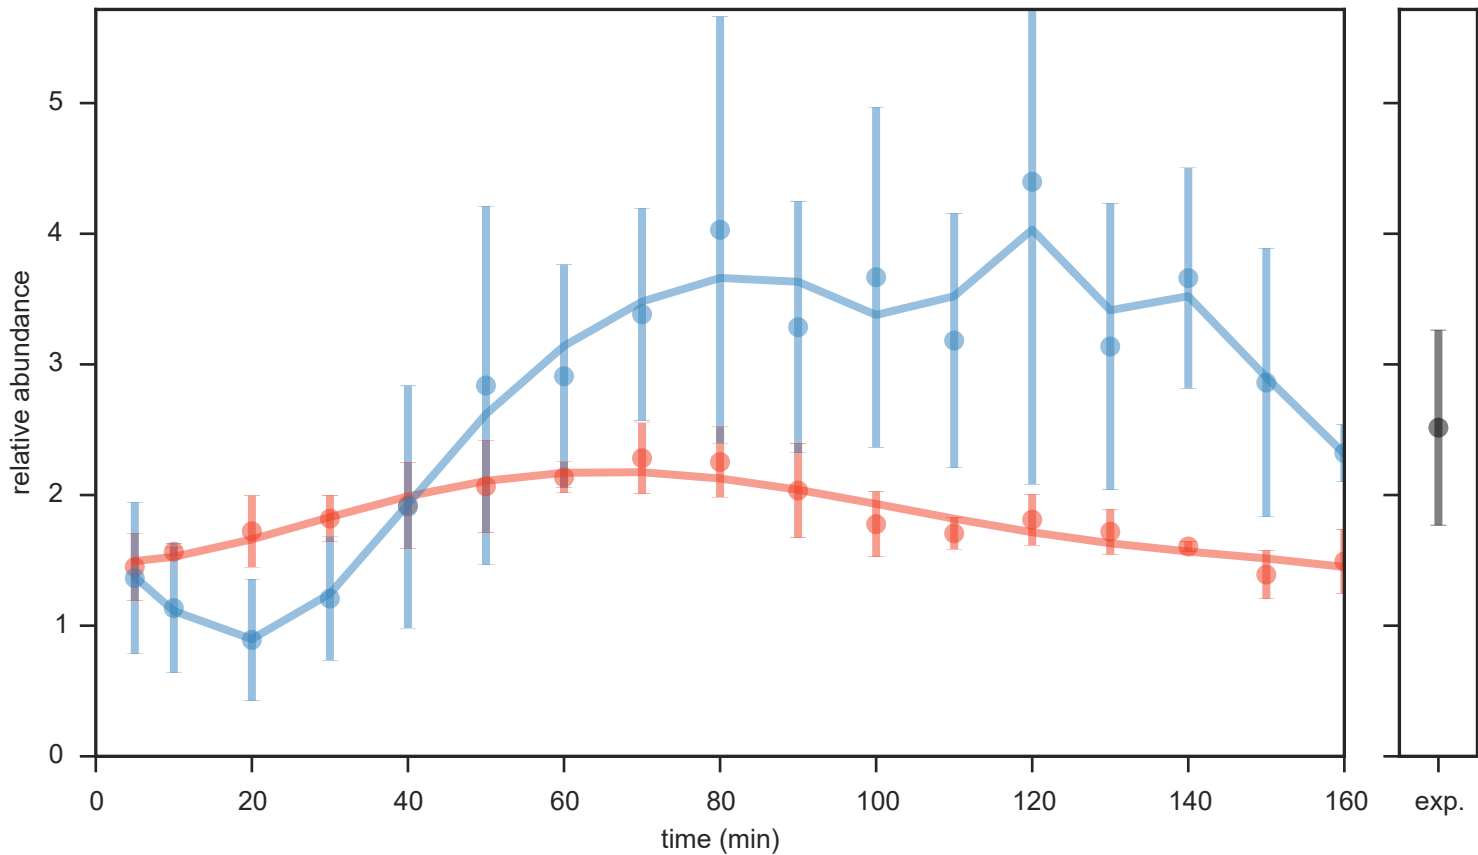

idms\_pid2446\_mz166.97

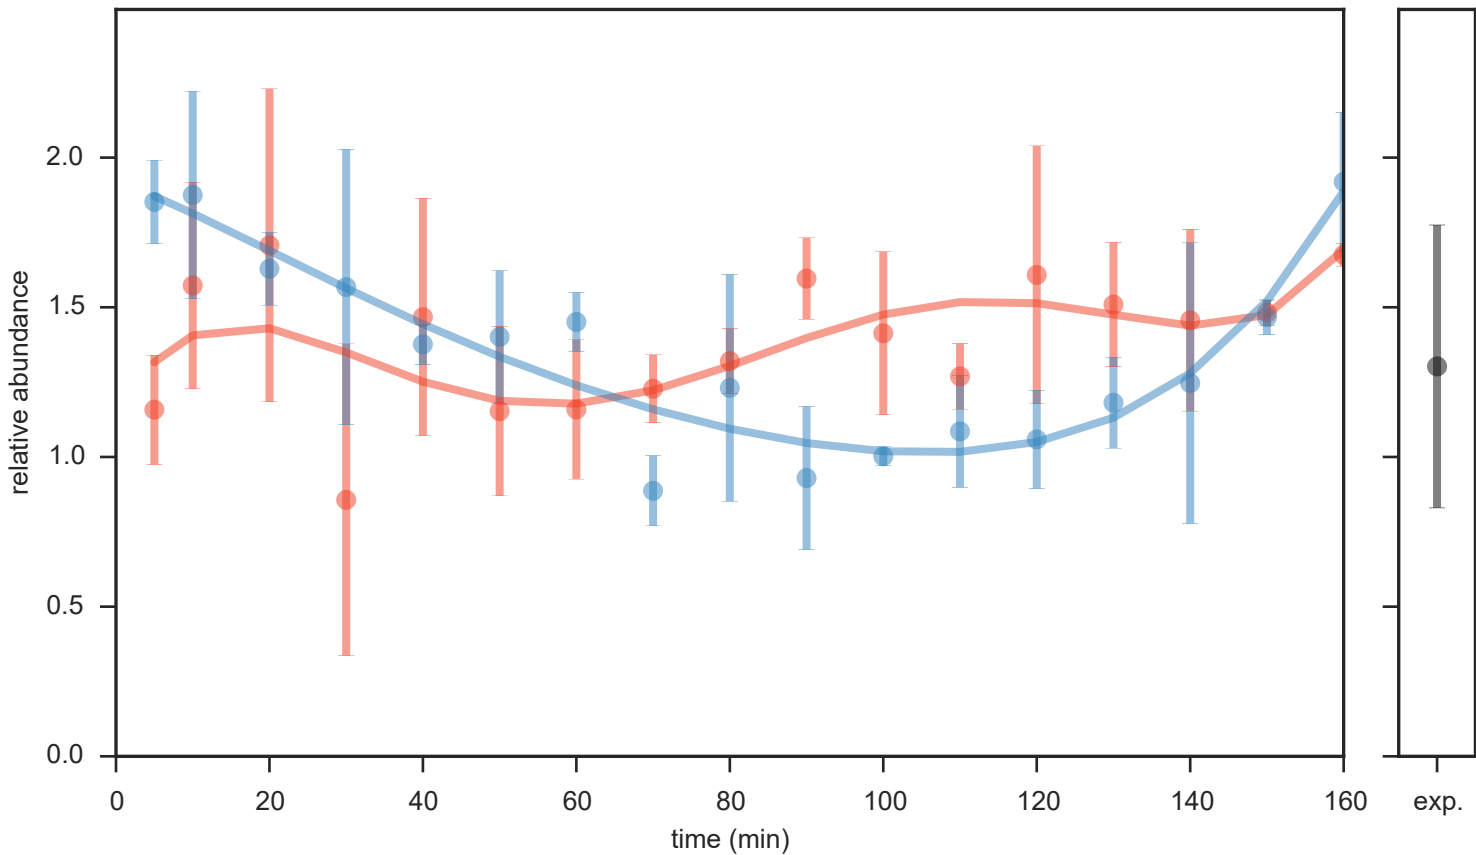

idms\_pid2487\_mz213.01

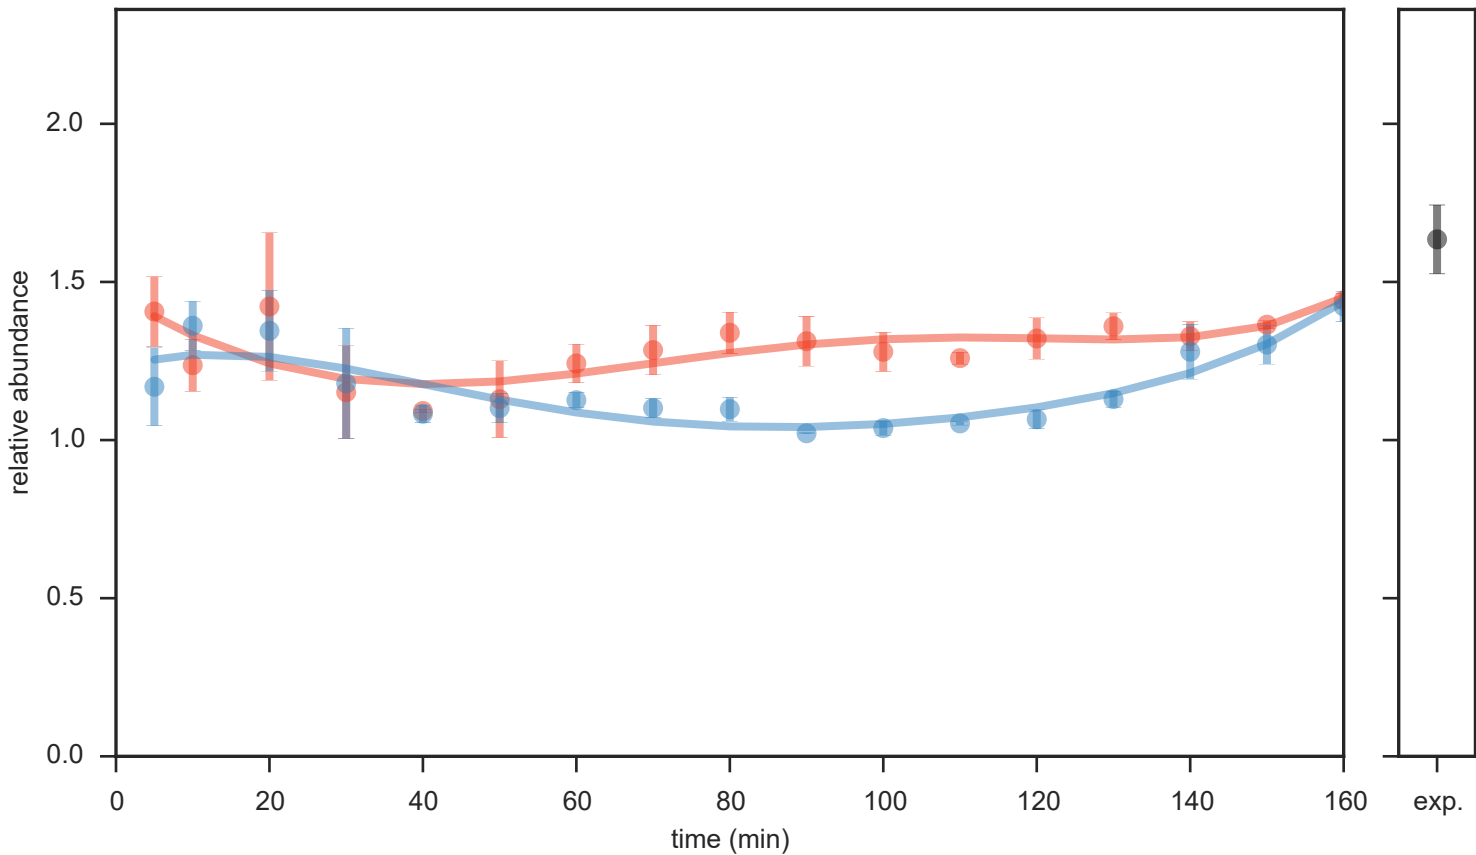

idms\_pid2666\_mz257.00

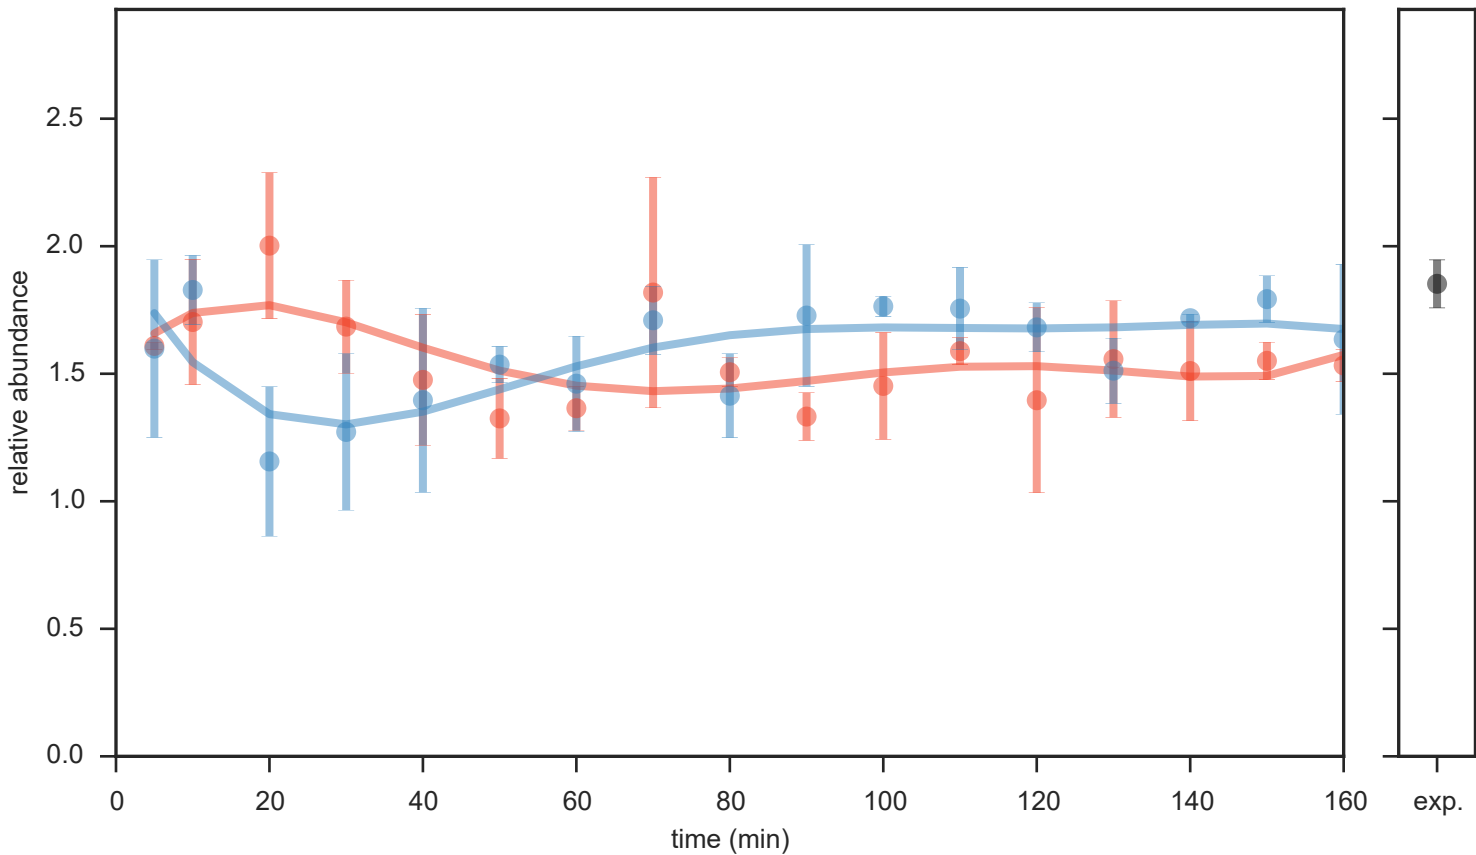



idms\_pid2867\_mz176.03

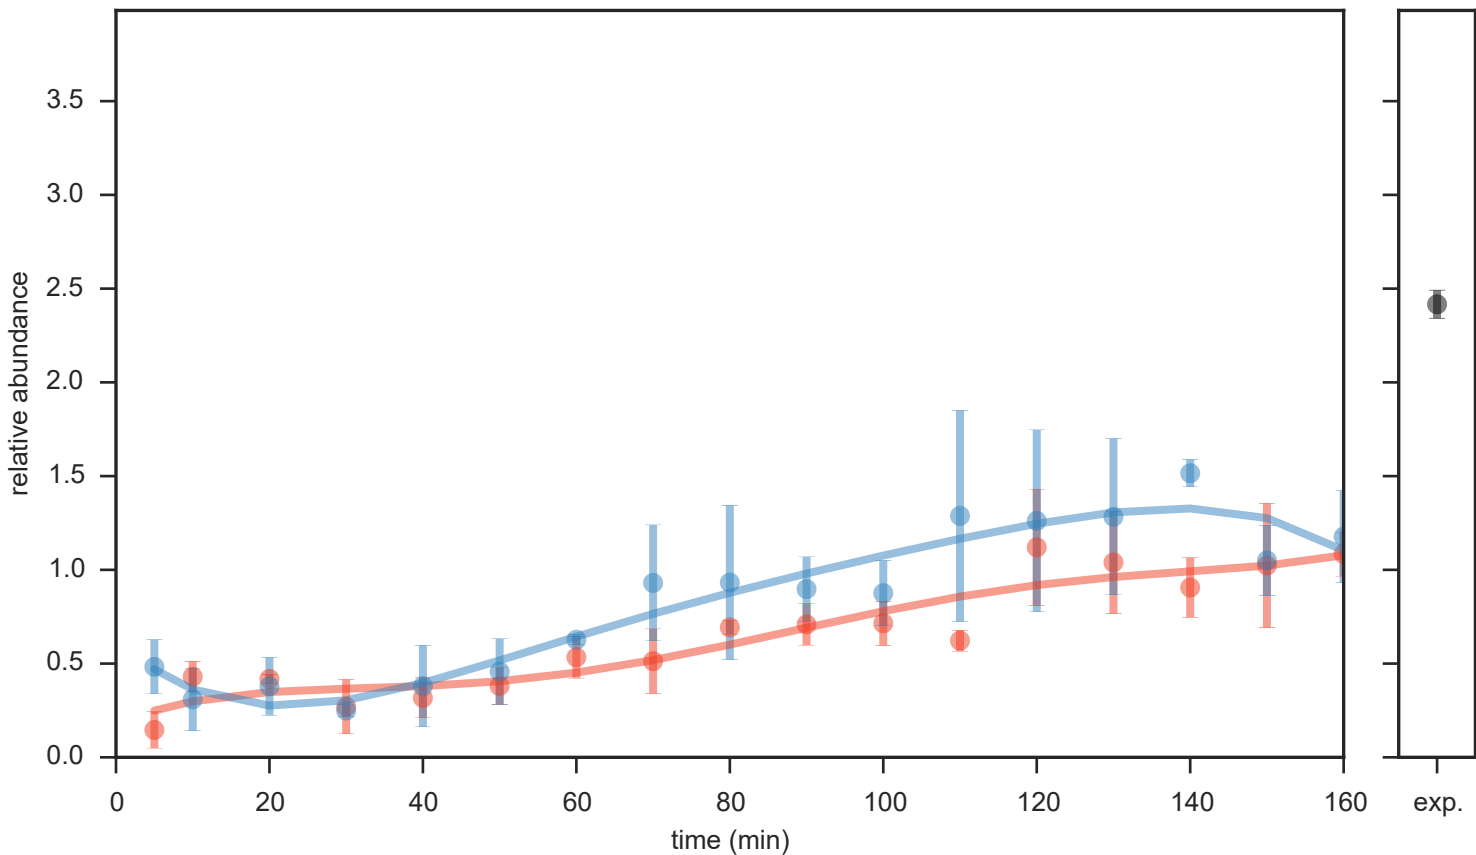

Supplement: EMS85252-supplement-Supplementary_Data_1.pdf [file EMS85252-supplement-Supplementary_Data_1.pdf]
