# Supplementary material
Source: PubMed Central journal article supplement (PMC7035108)

## Supplemental Data 2. Metabolite abundance profiles for UHPLC-LTQ data.

Cell-cycle dependent abundance profiles of metabolite features detected via the method UHPLC-LTQ (positive mode); blue profiles are from synchronized, red from control cultures. Mean values  $\pm$  SD are shown (3 biological replicates per condition). The time-point (box) labeled "exp" indicates respective exponentially growing pre-cultures (n=6).

synchronized 

control 

idms\_pid1\_mz143.15

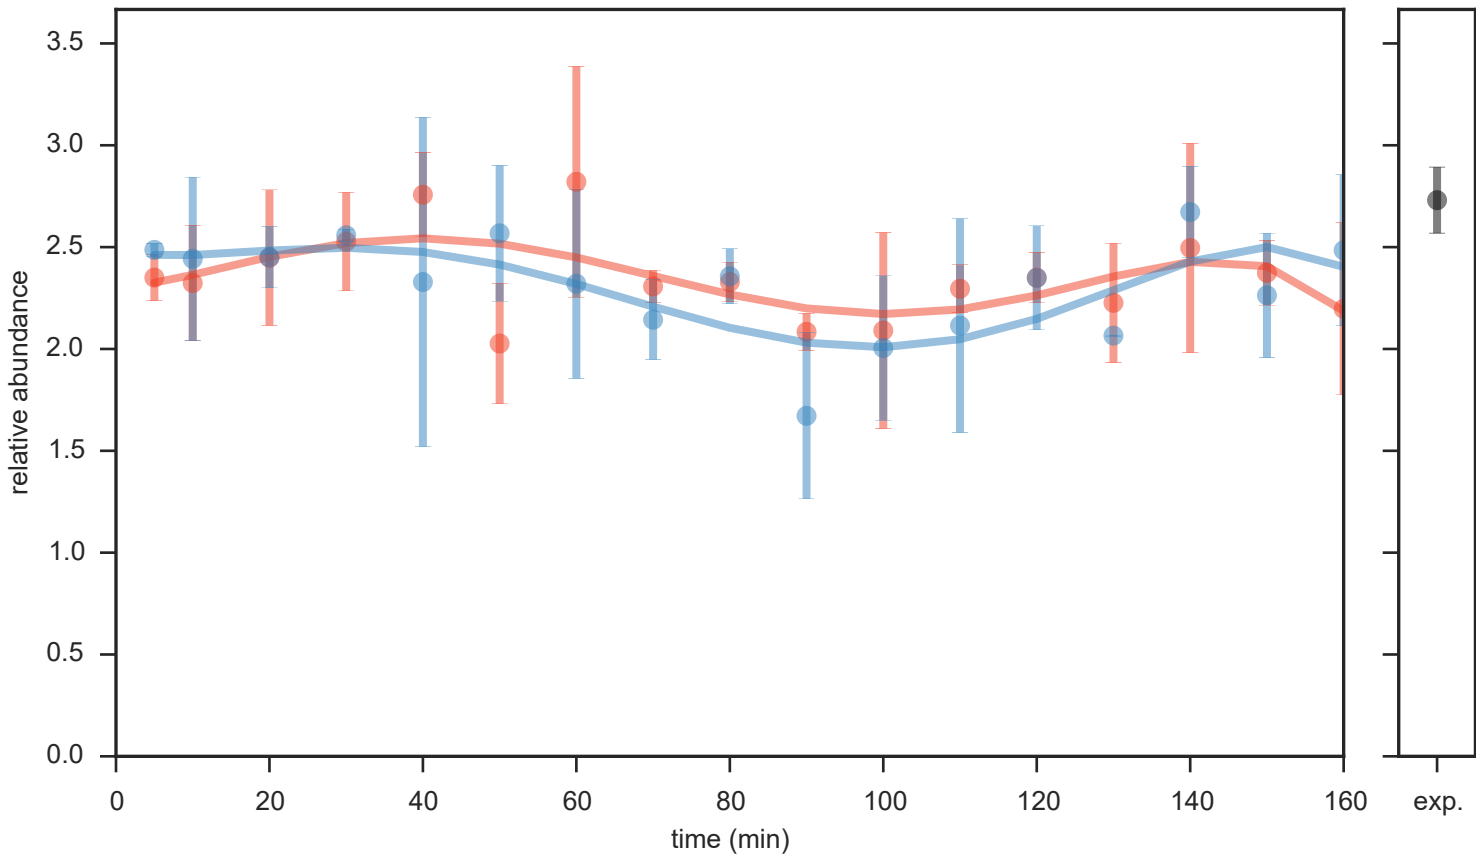

idms\_pid3\_mz112.05

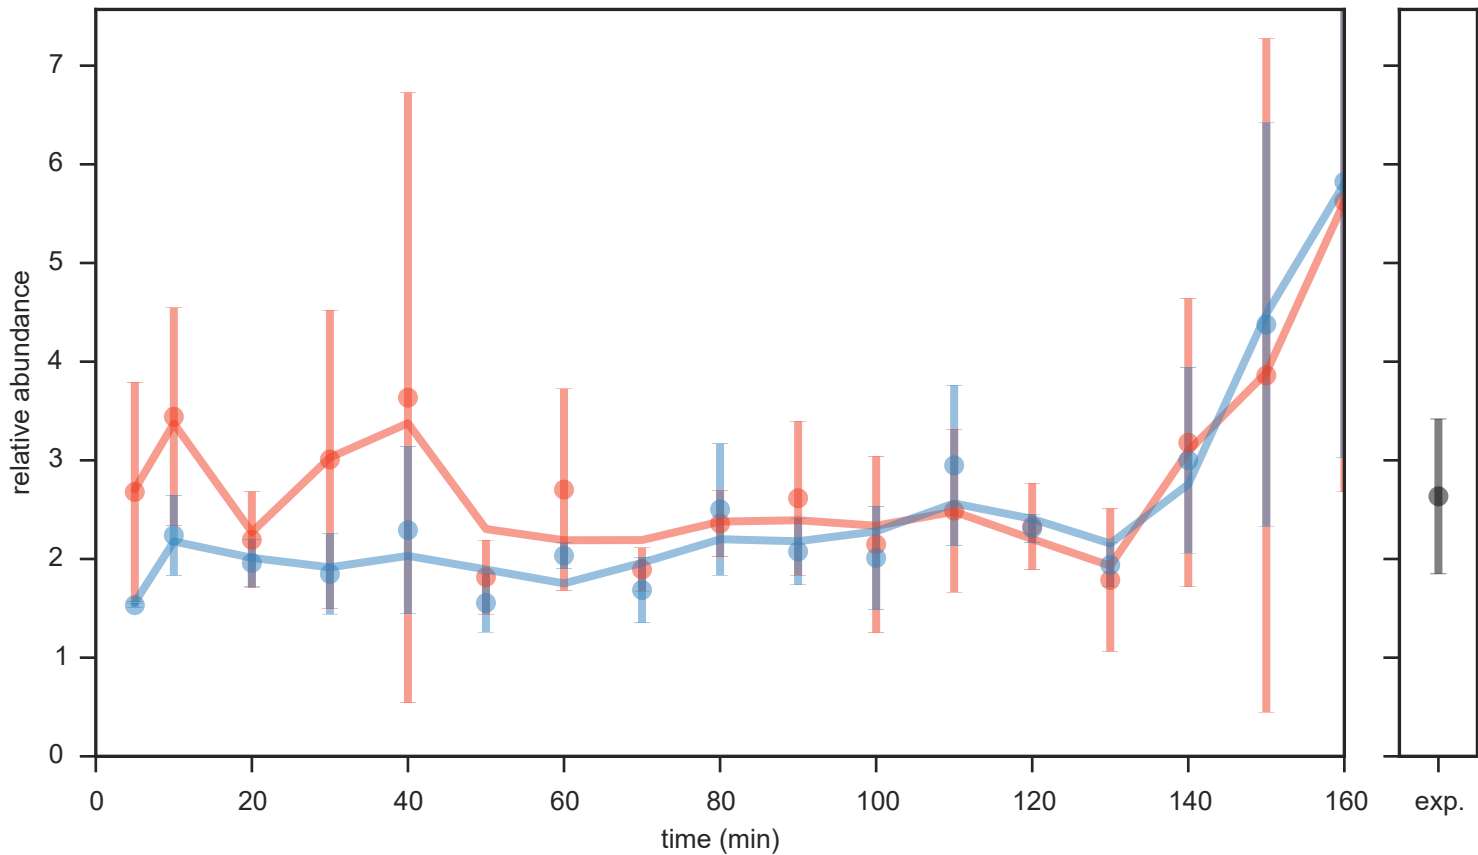

idms\_pid5\_mz148.06

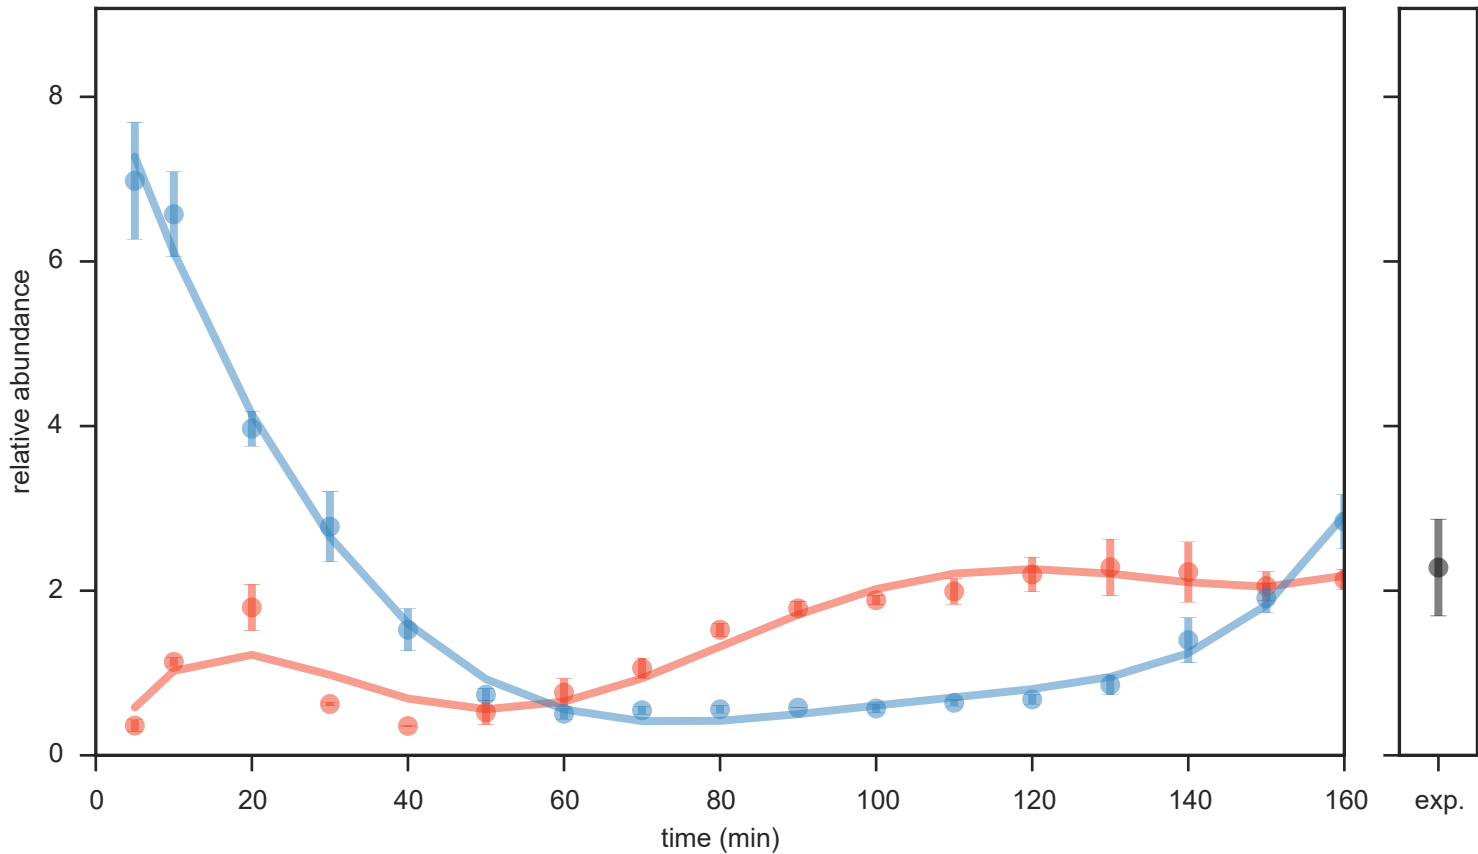

idms\_pid6\_mz297.17

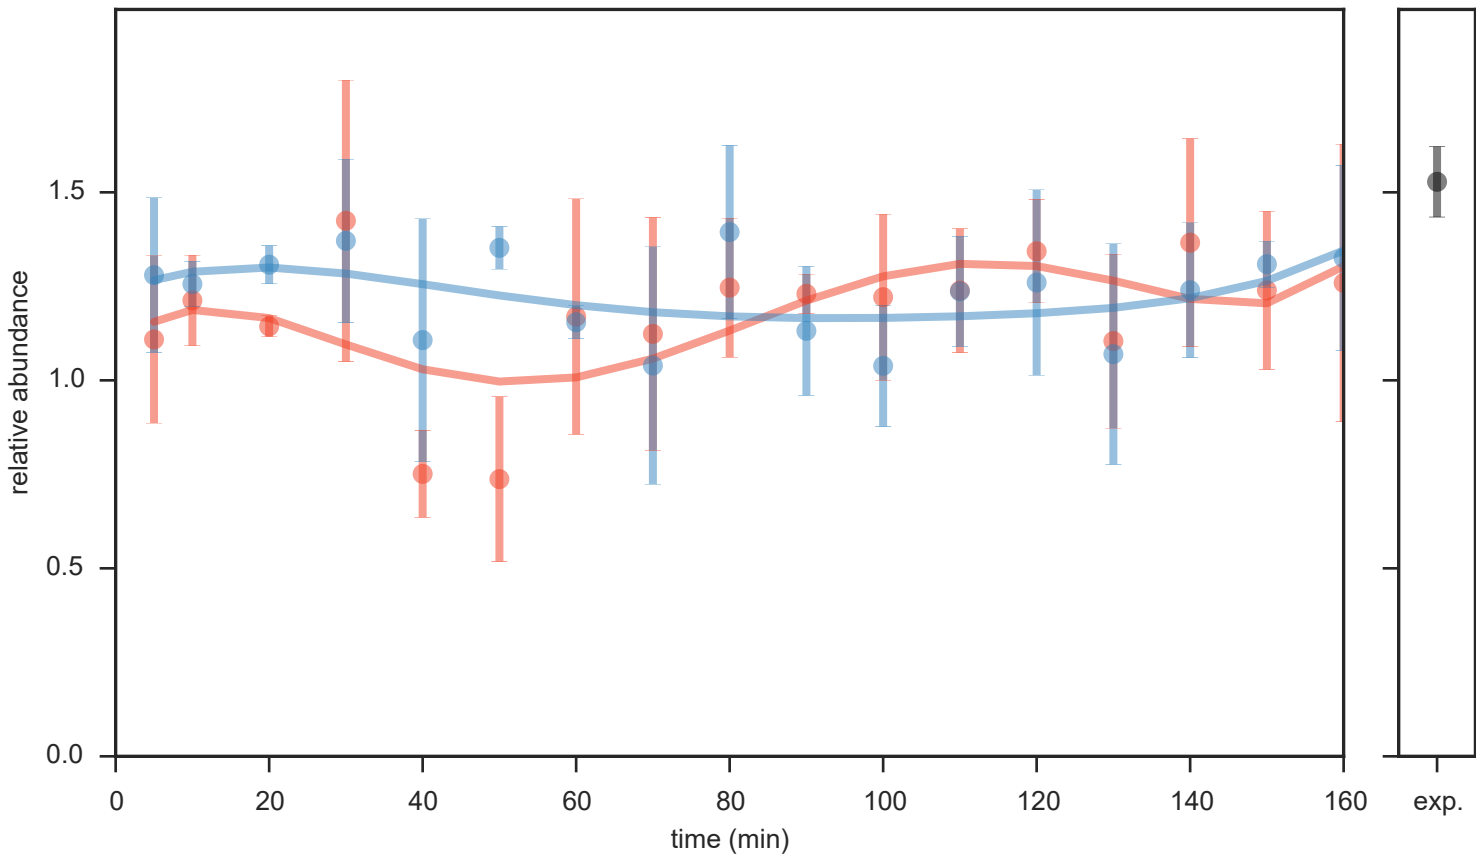

idms\_pid10\_mz310.08

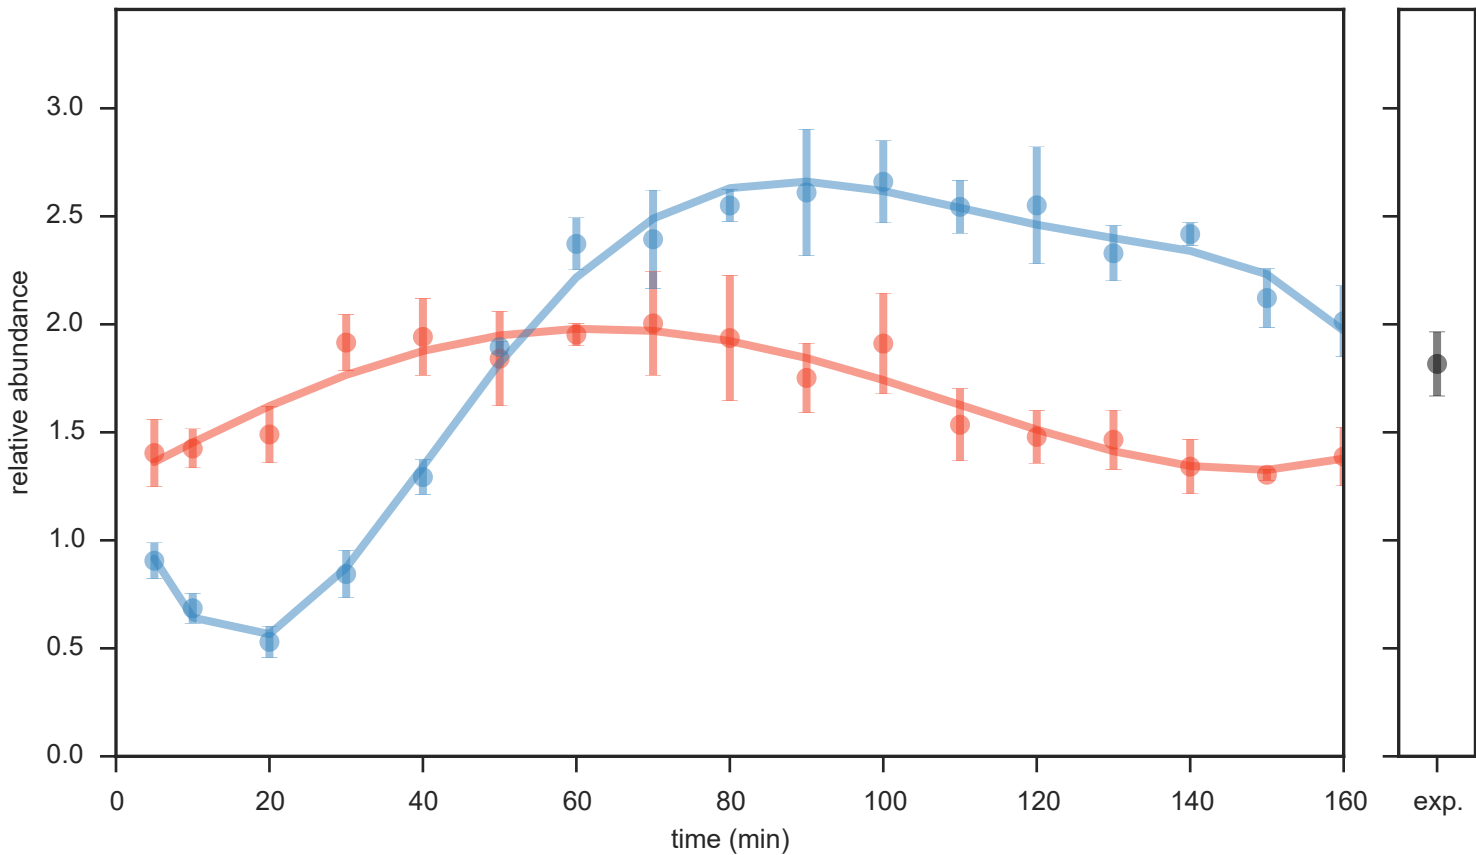

idms\_pid11\_mz223.09

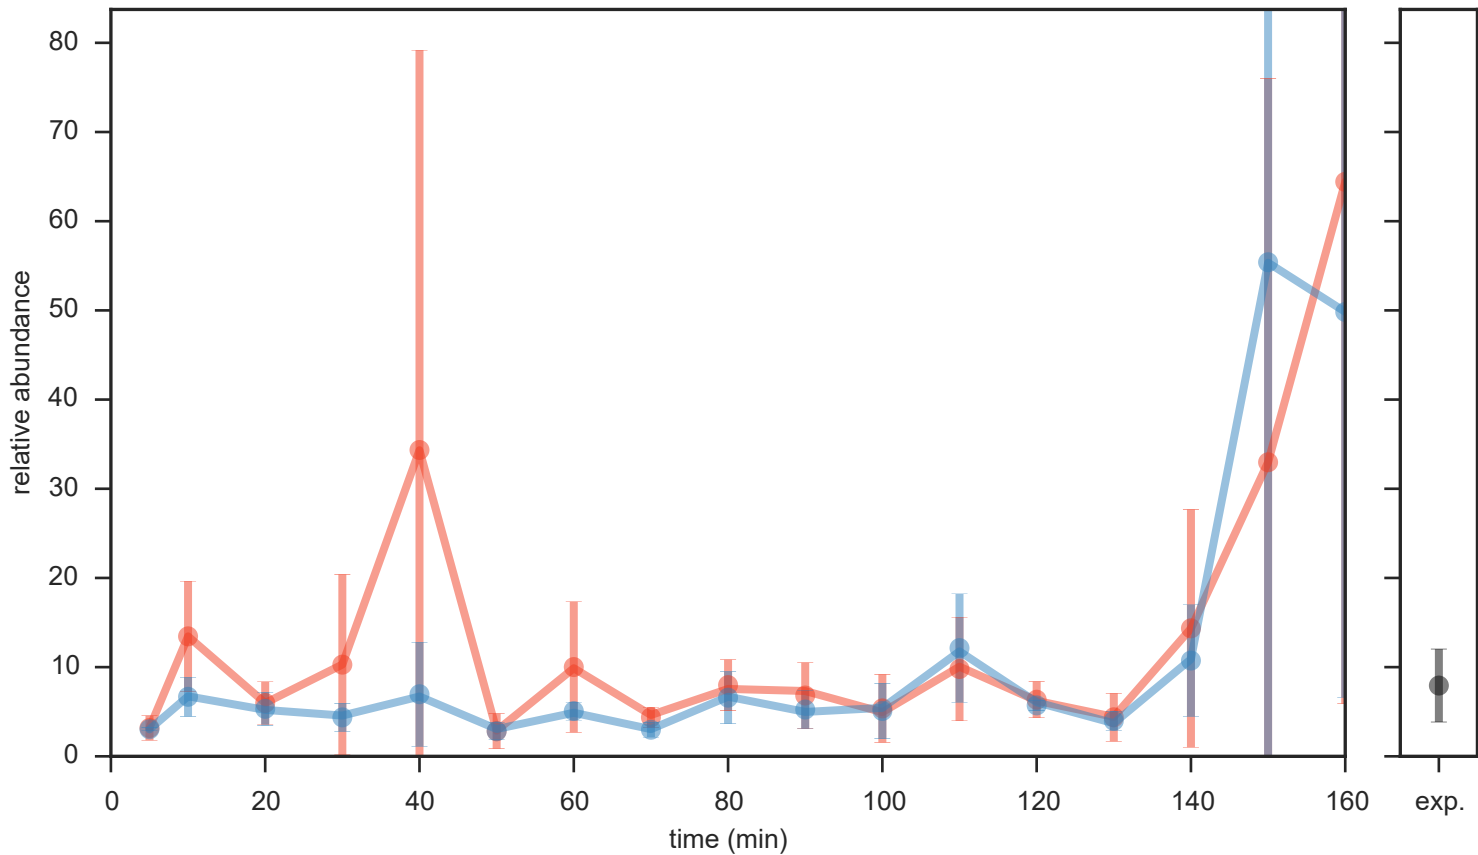

idms\_pid13\_mz104.07

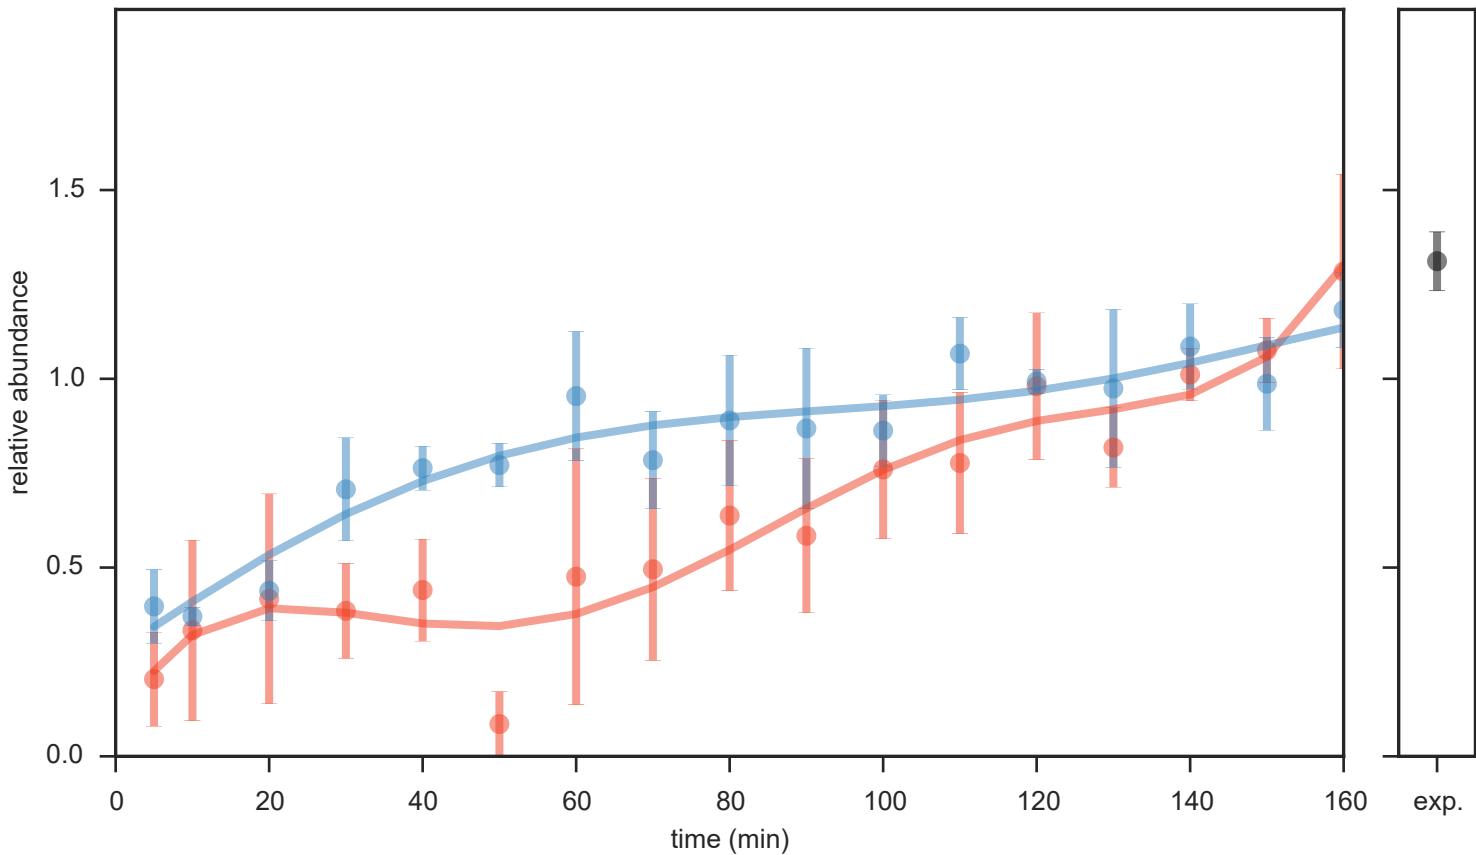



idms\_pid14\_mz147.11

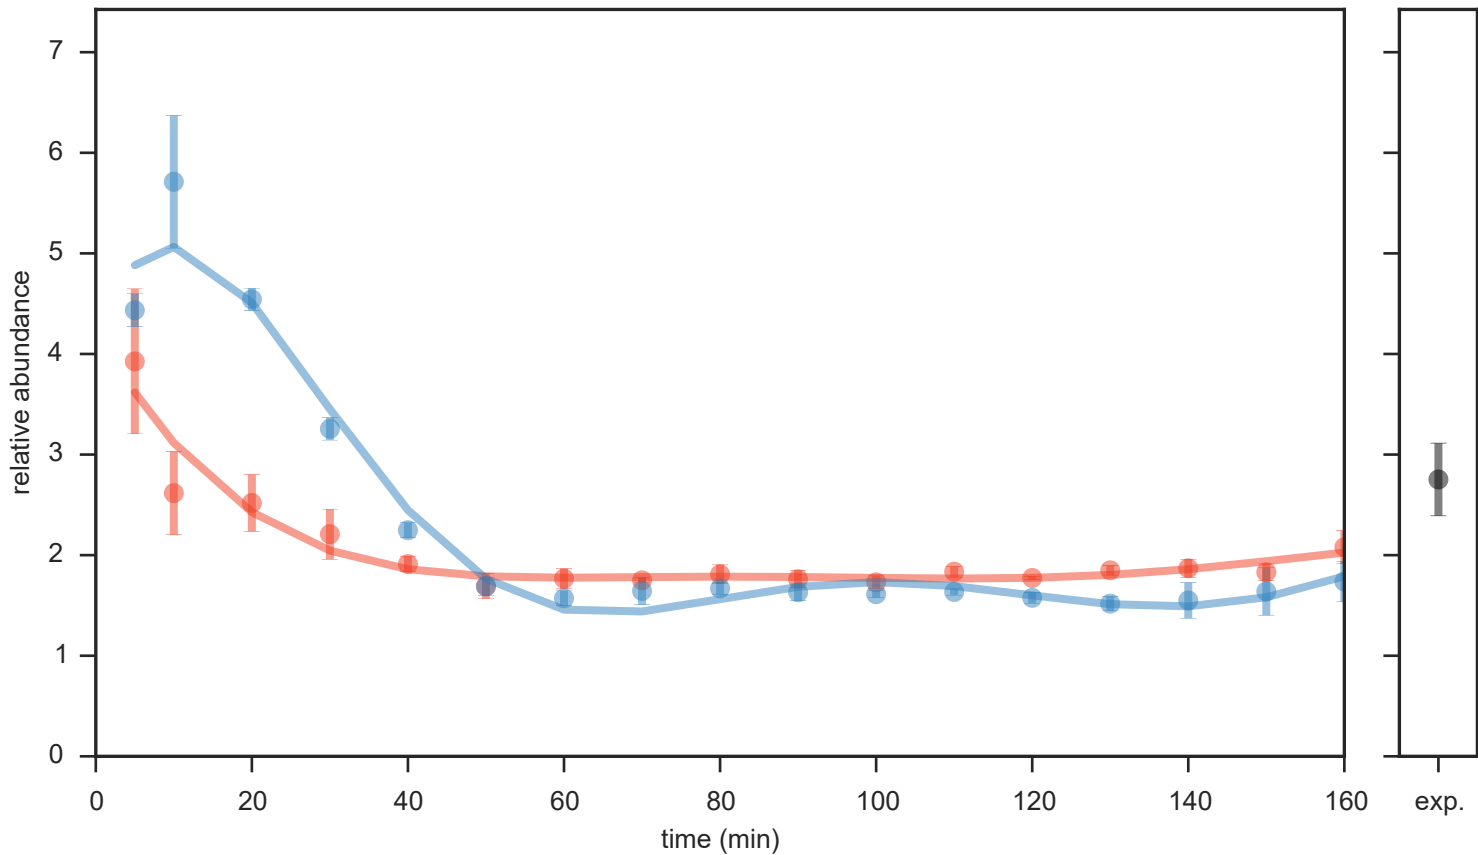

idms\_pid18\_mz272.26

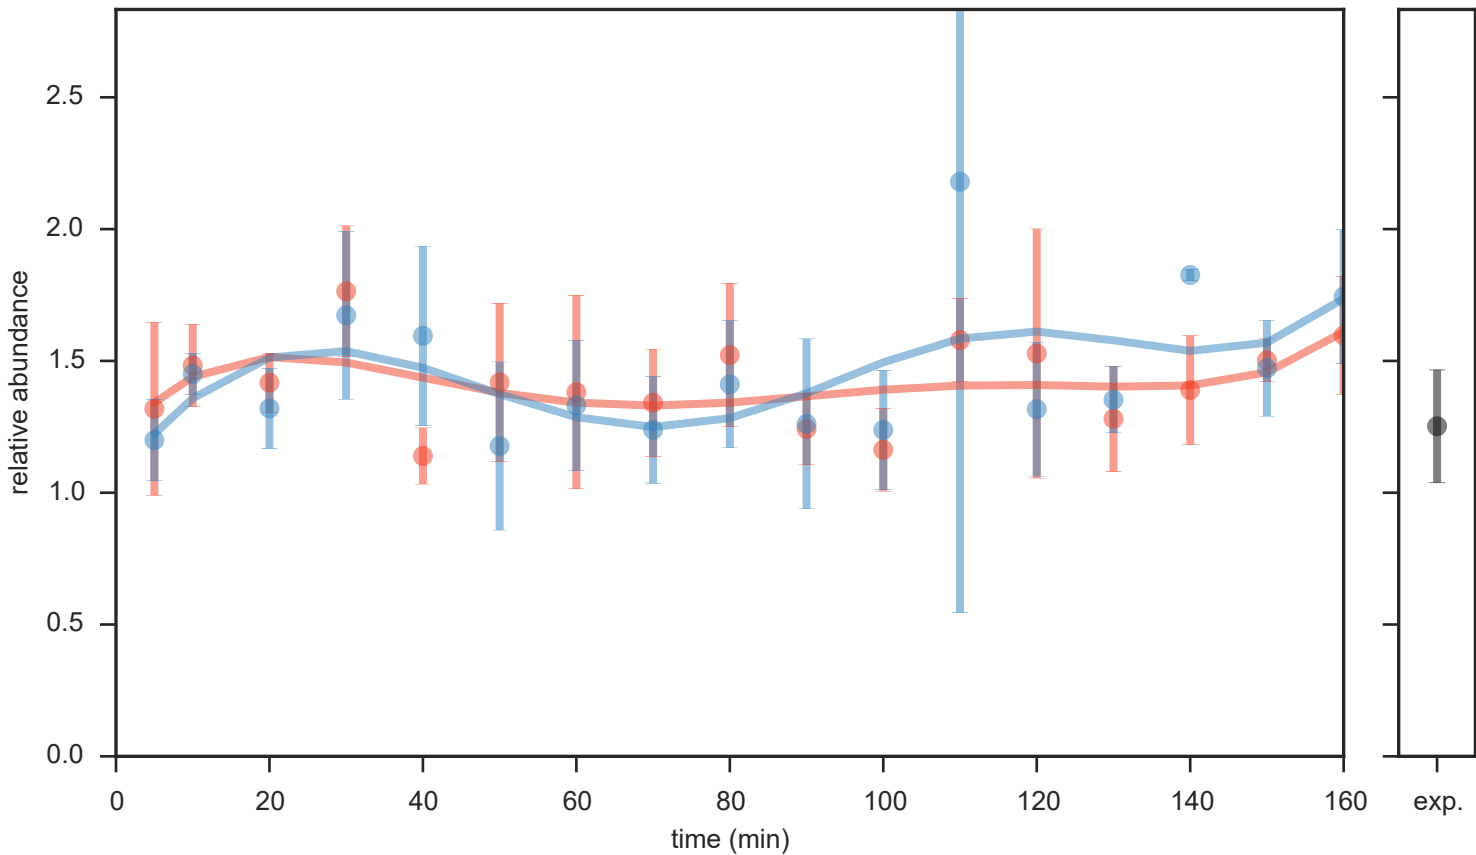

idms\_pid19\_mz159.07

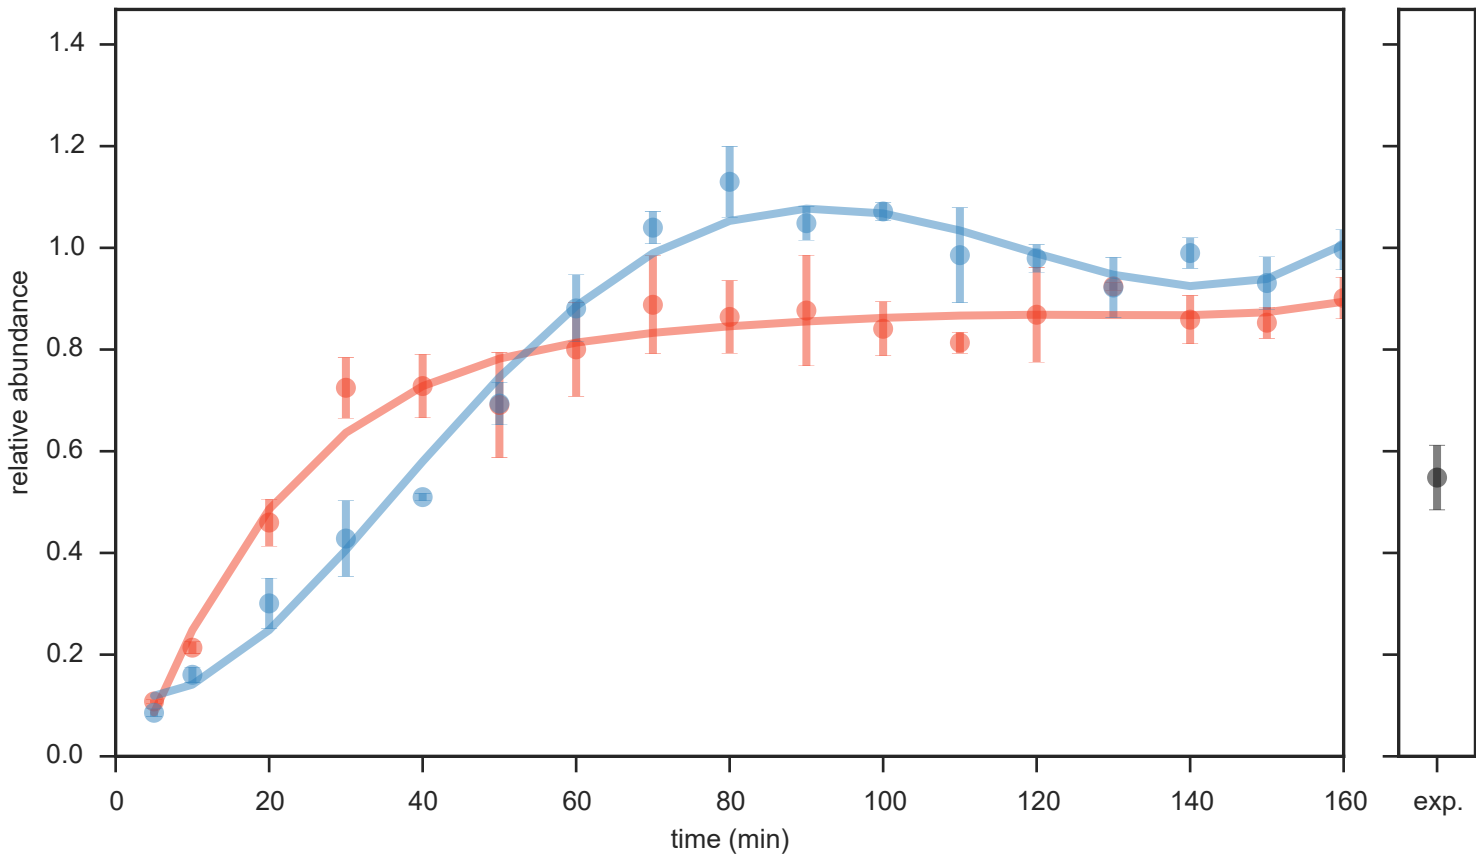

idms\_pid20\_mz175.10

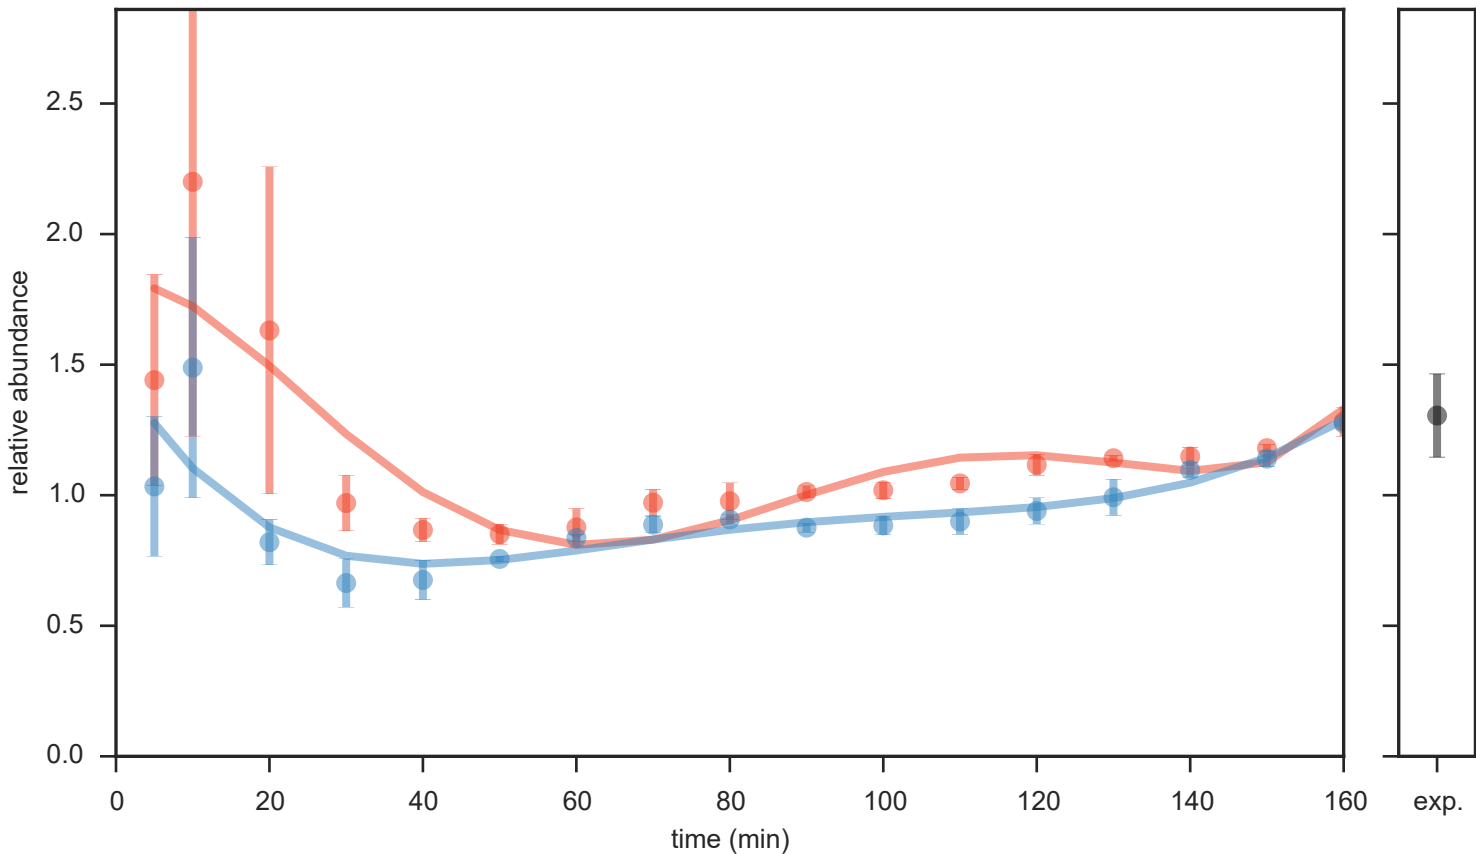

idms\_pid25\_mz315.05

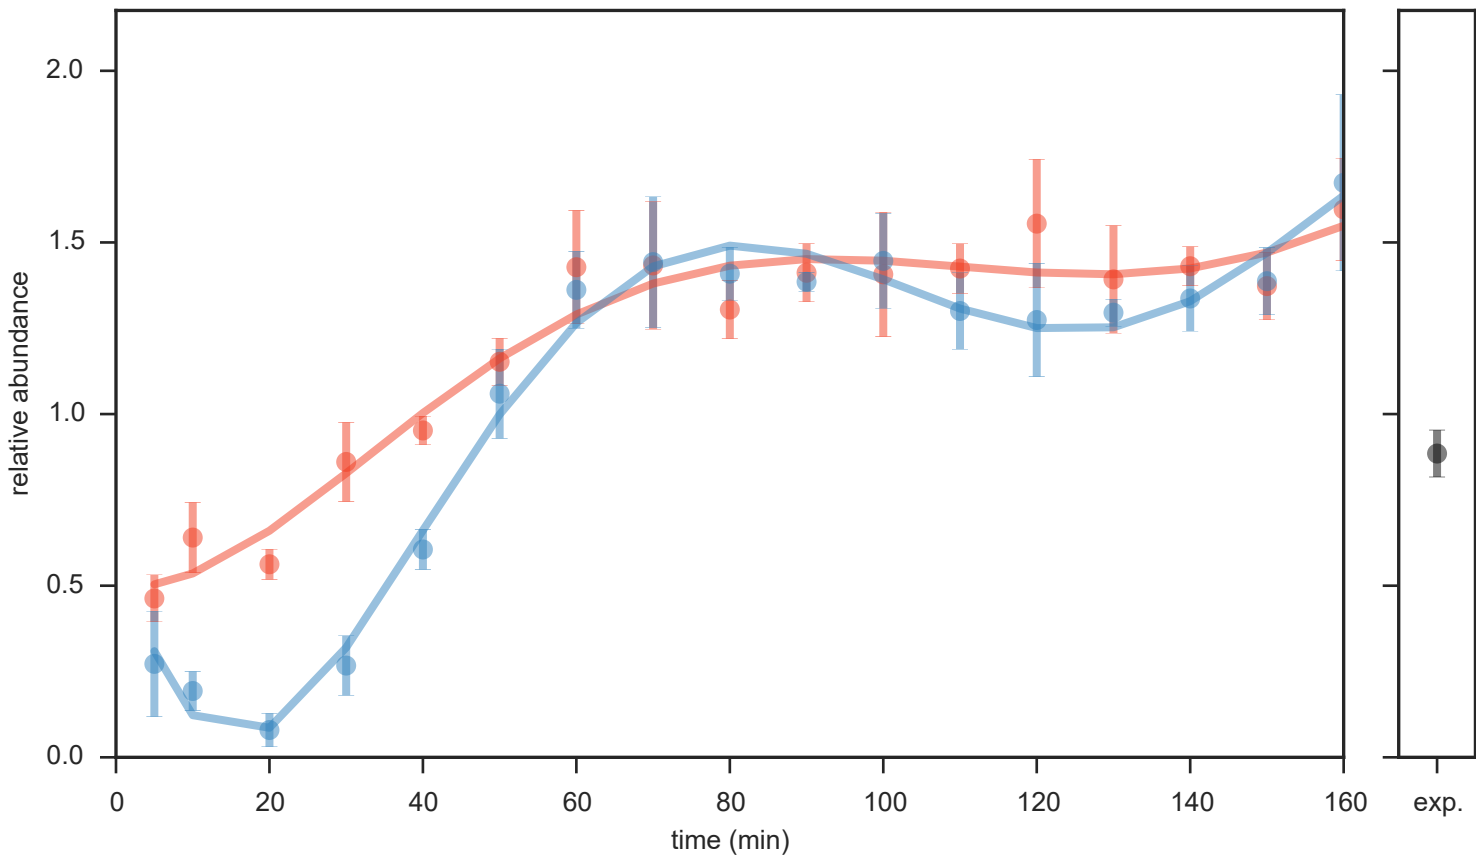

idms\_pid26\_mz118.08

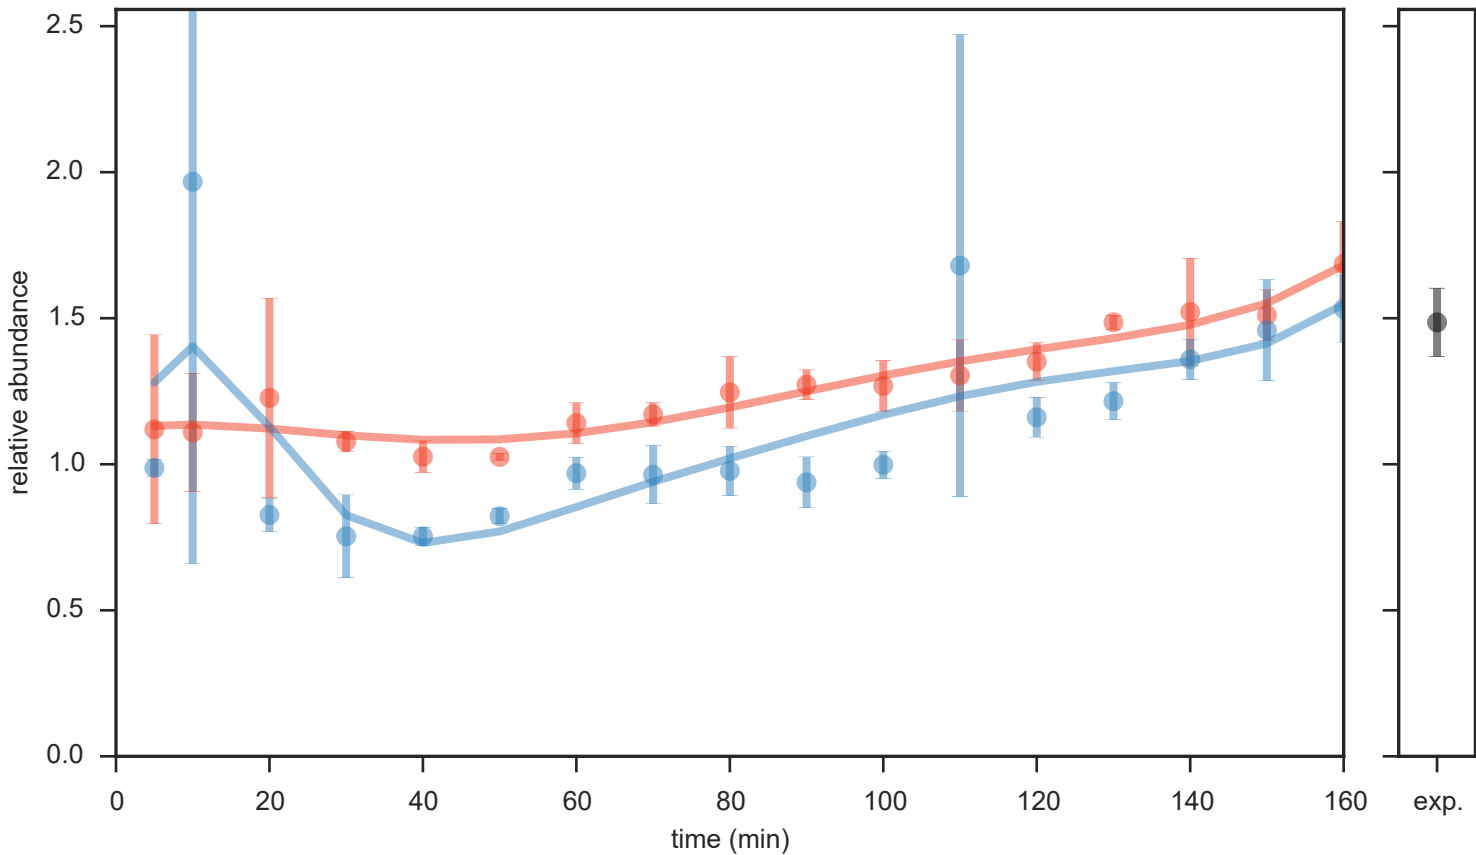

idms\_pid27\_mz268.10

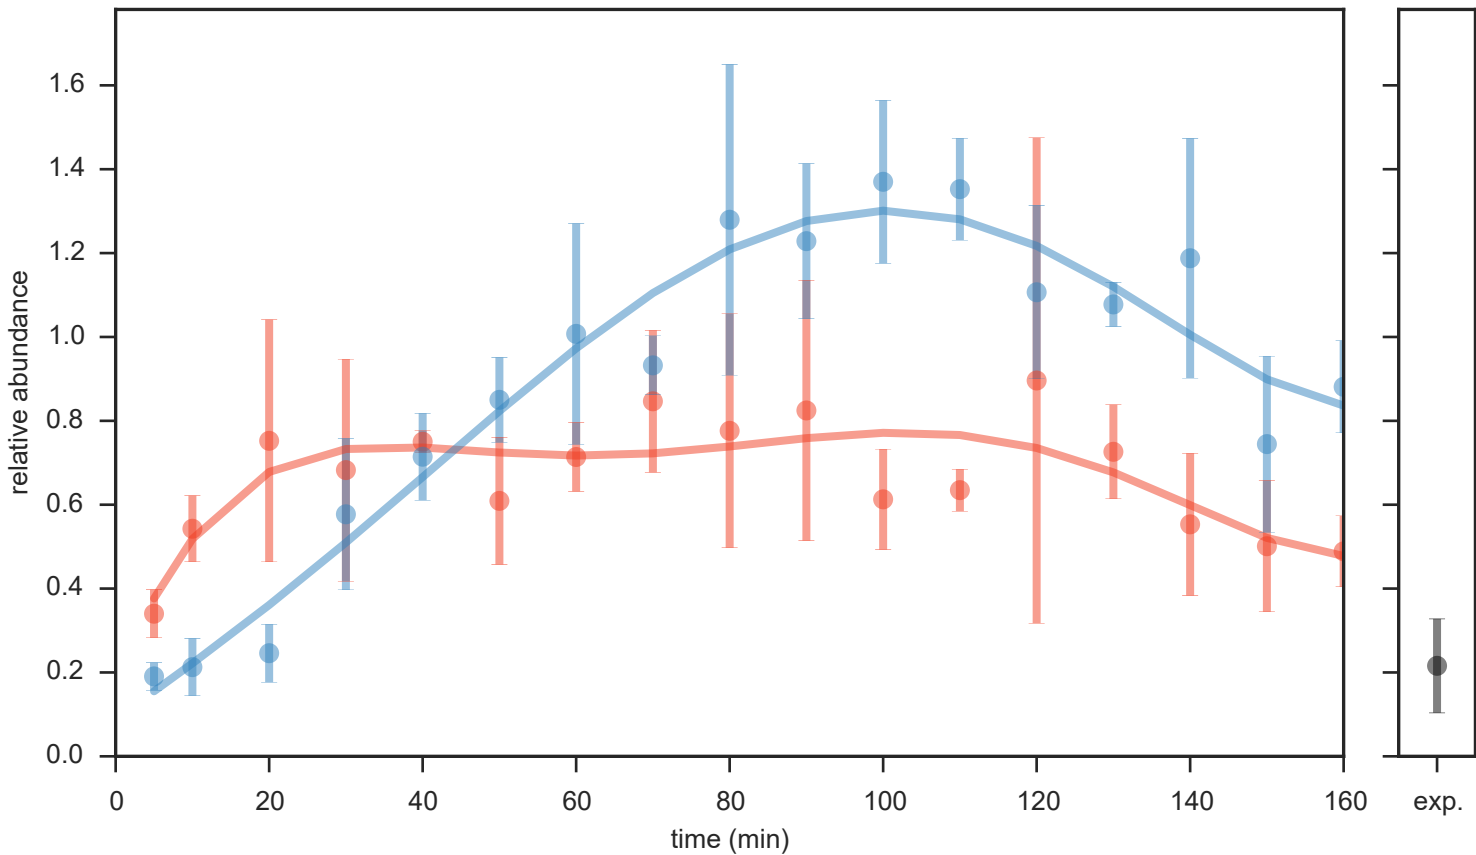

idms\_pid28\_mz248.03

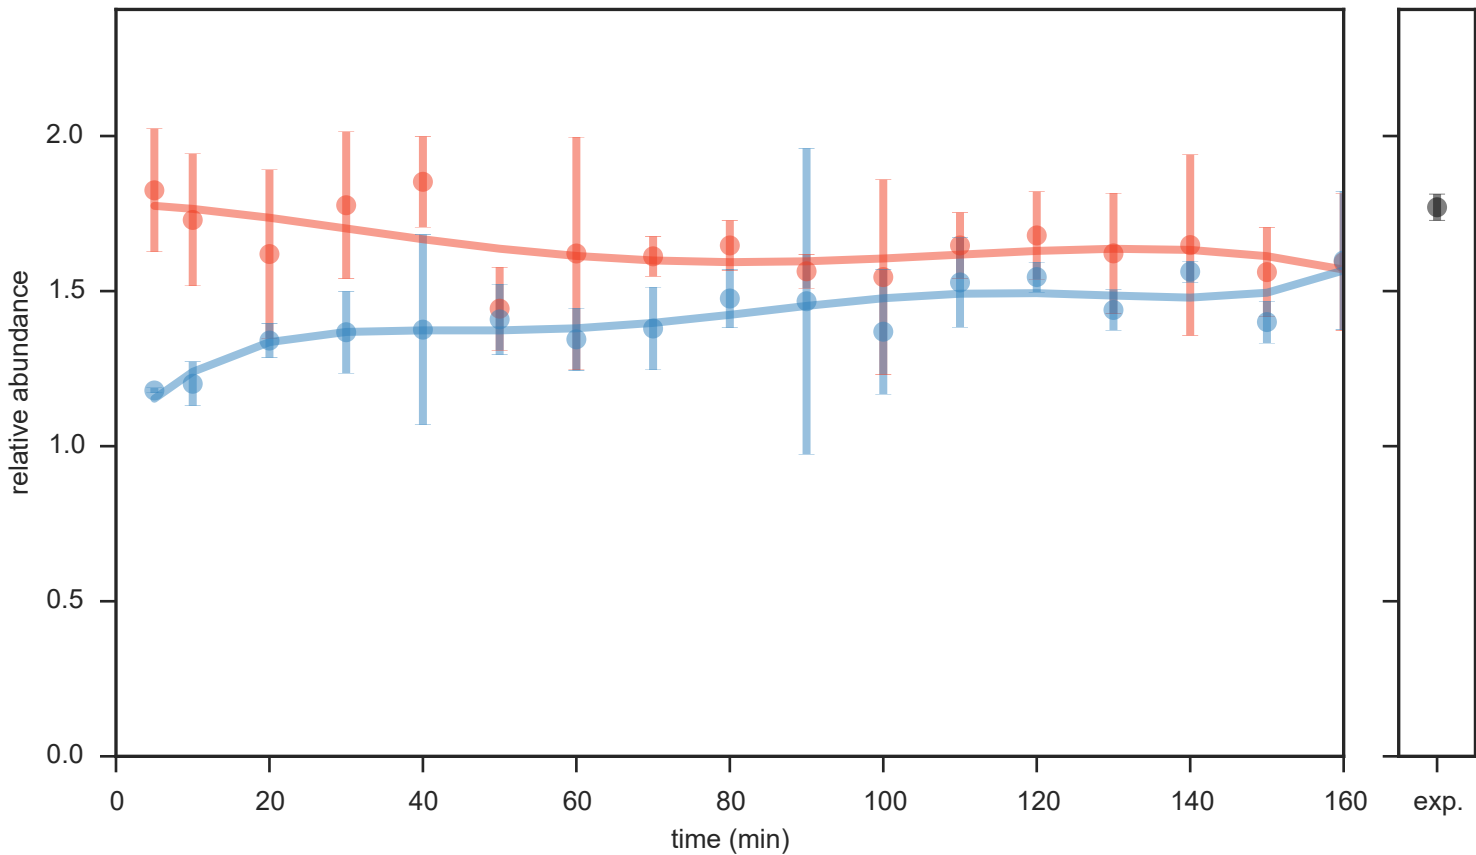



idms\_pid29\_mz420.05

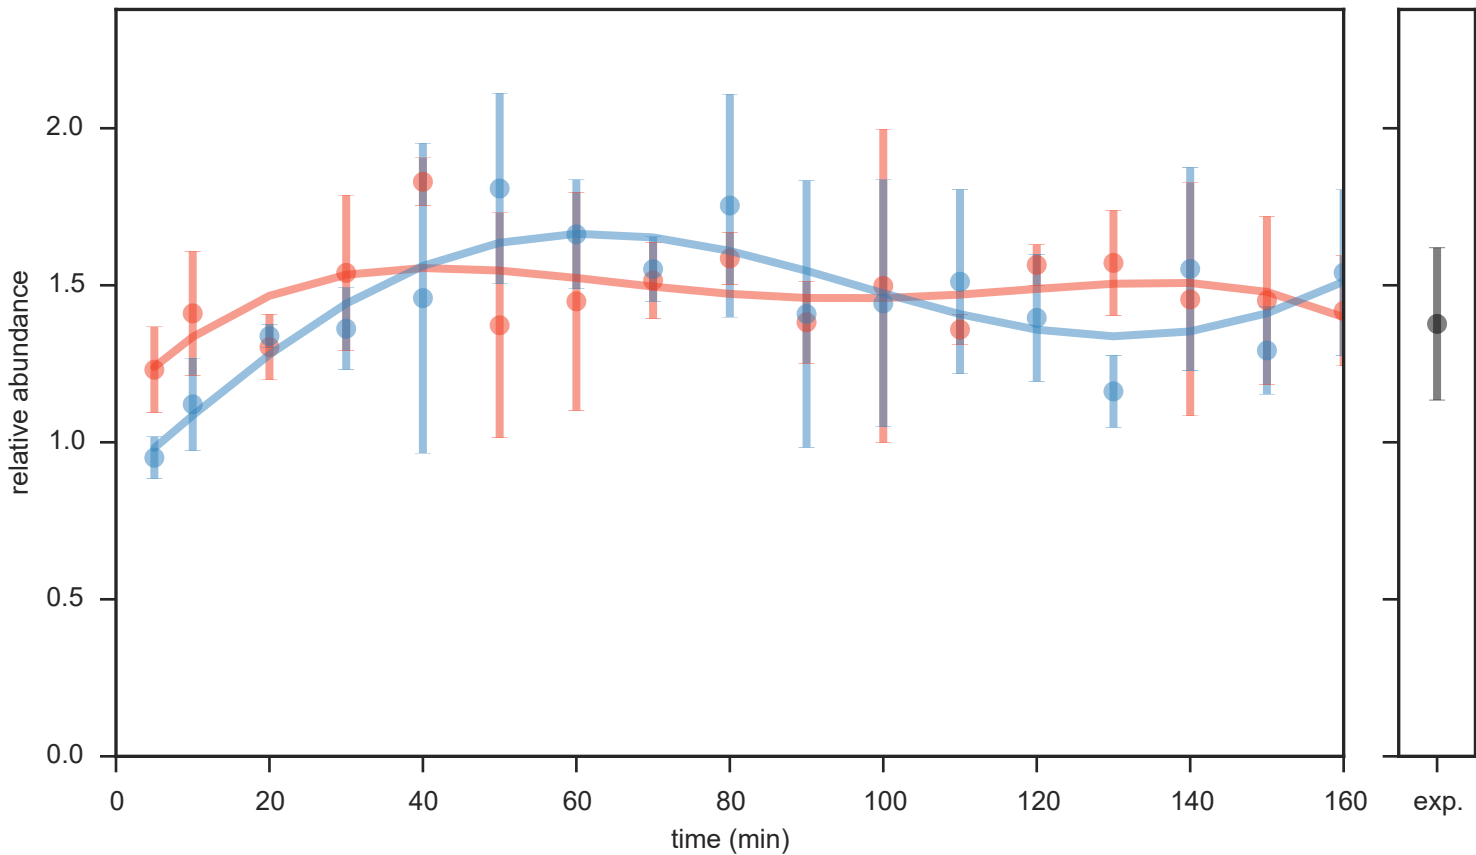

idms\_pid30\_mz202.19

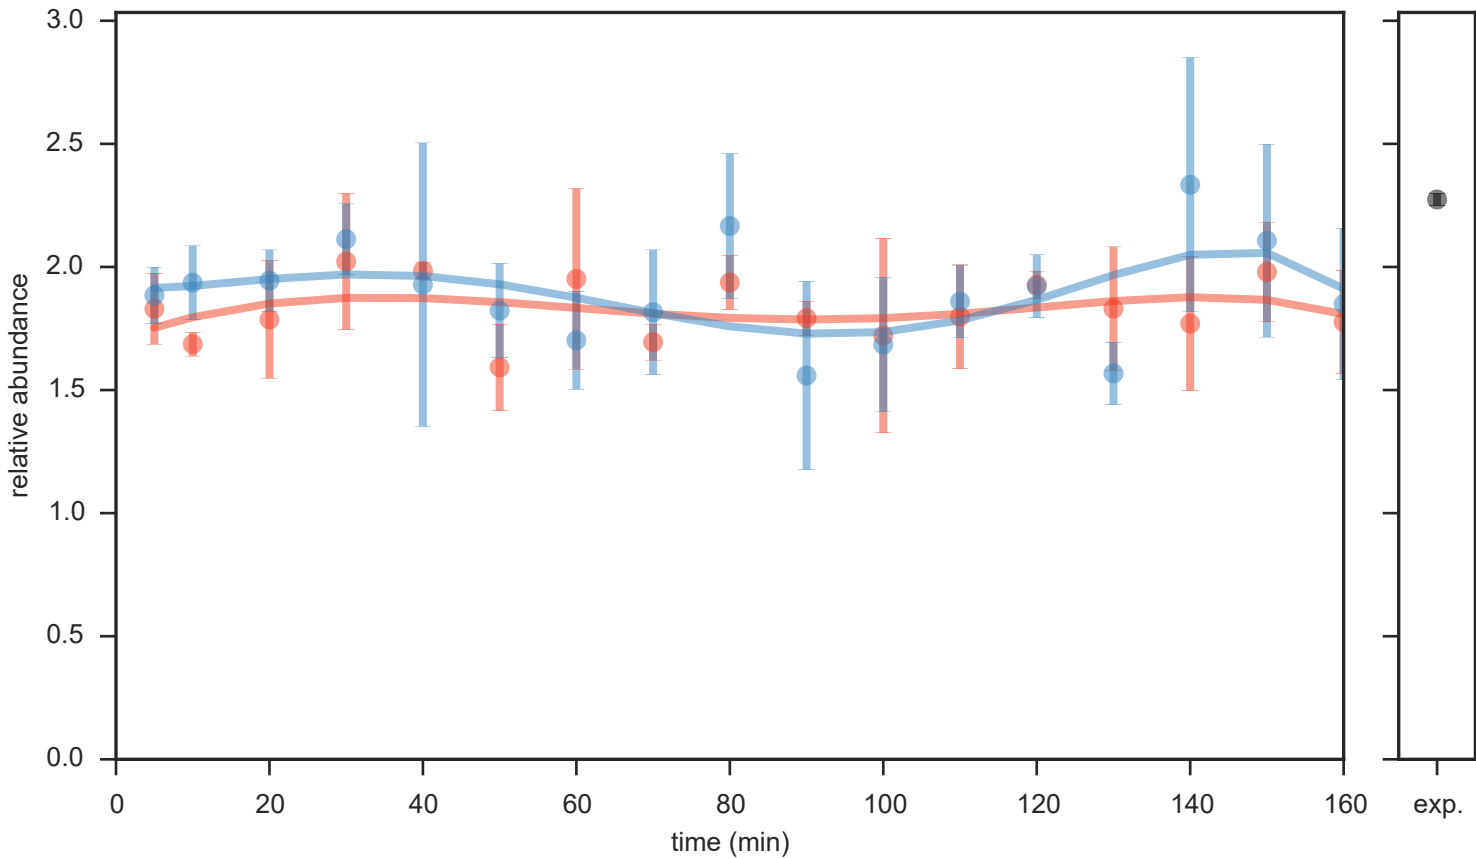

idms\_pid32\_mz164.05

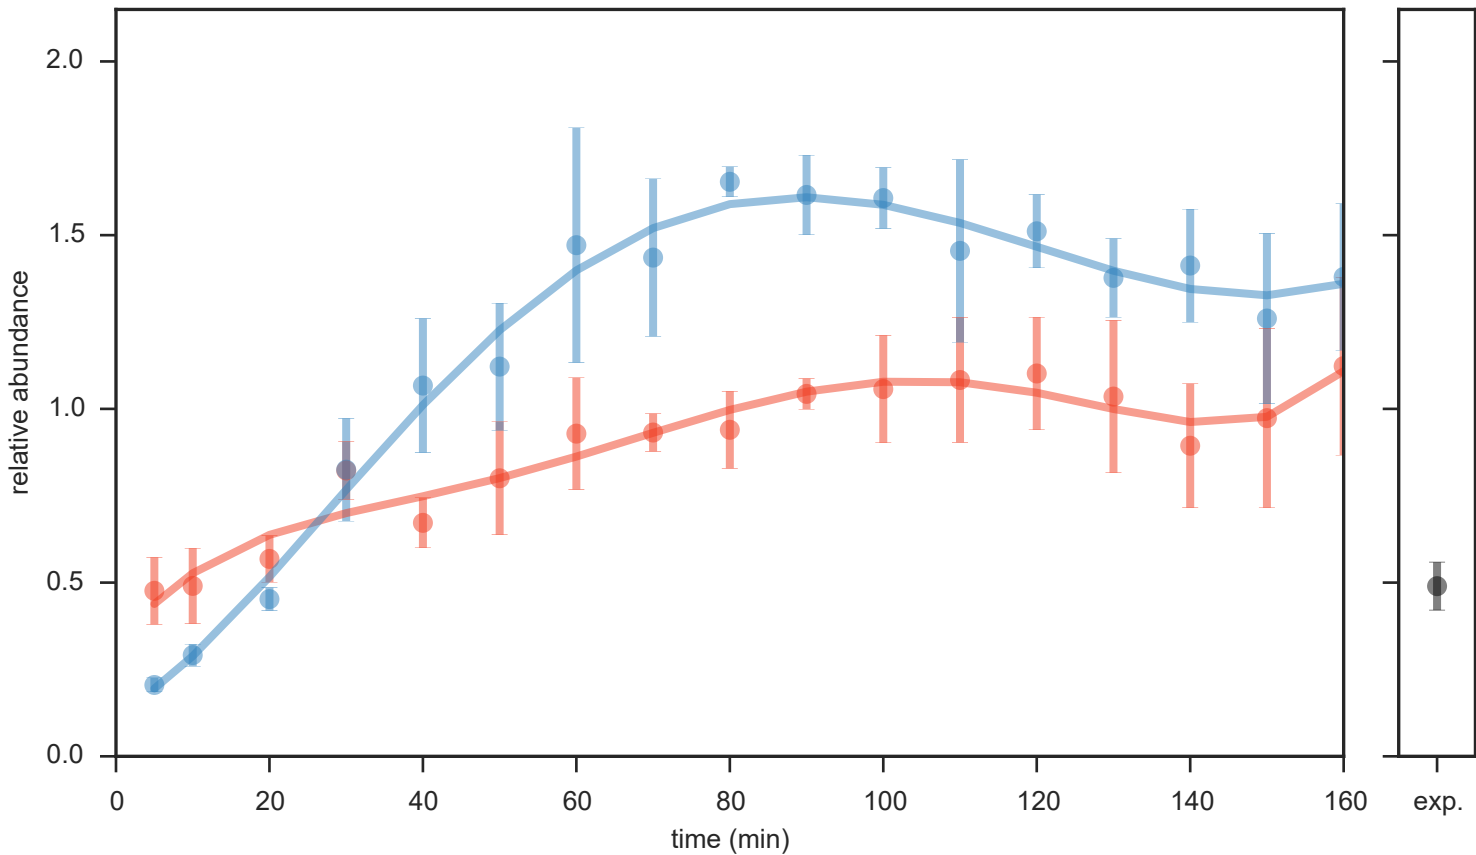

idms\_pid33\_mz443.19

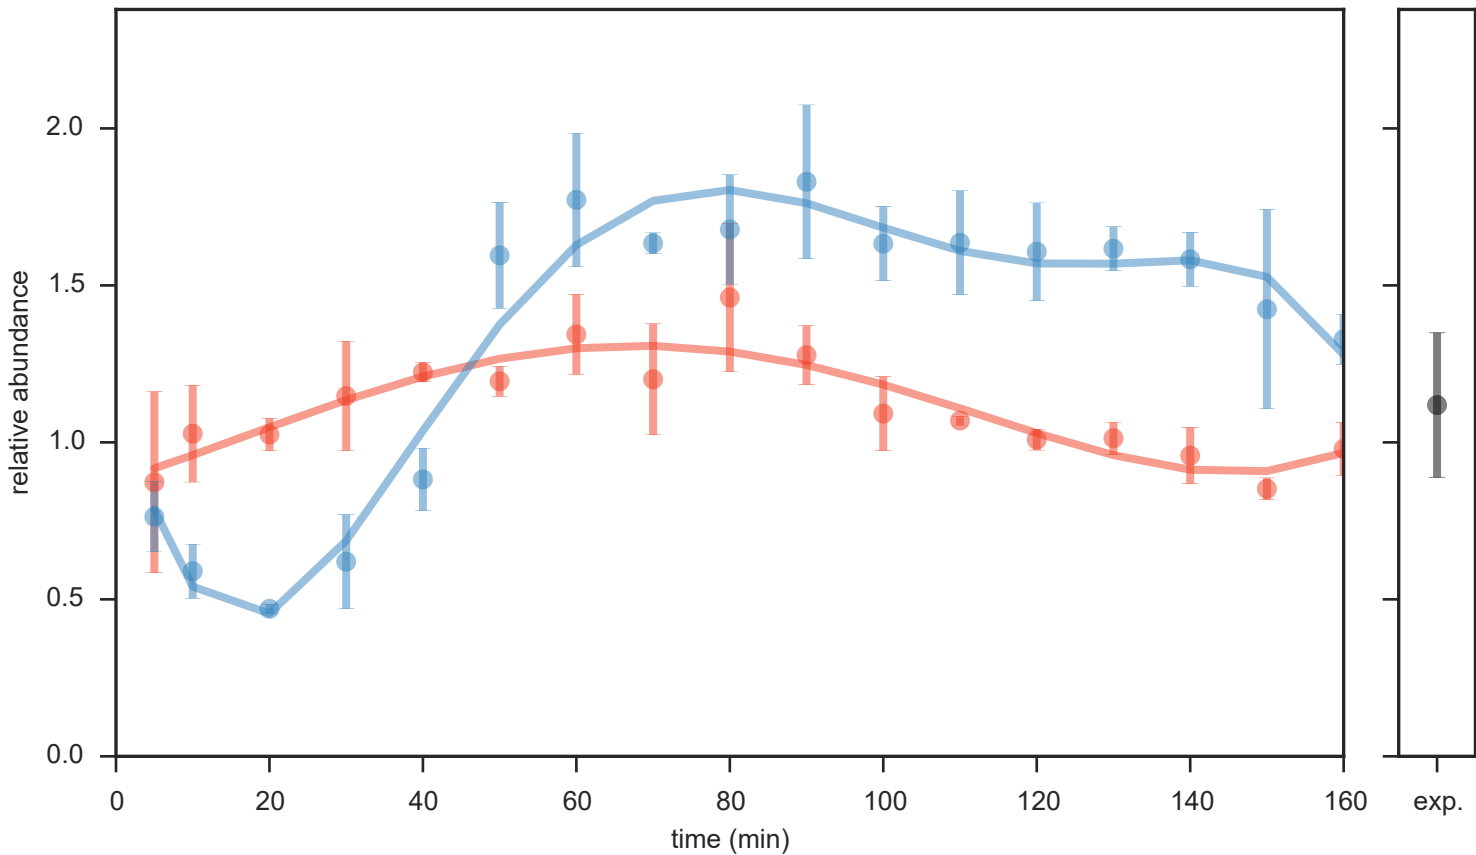

idms\_pid35\_mz322.23

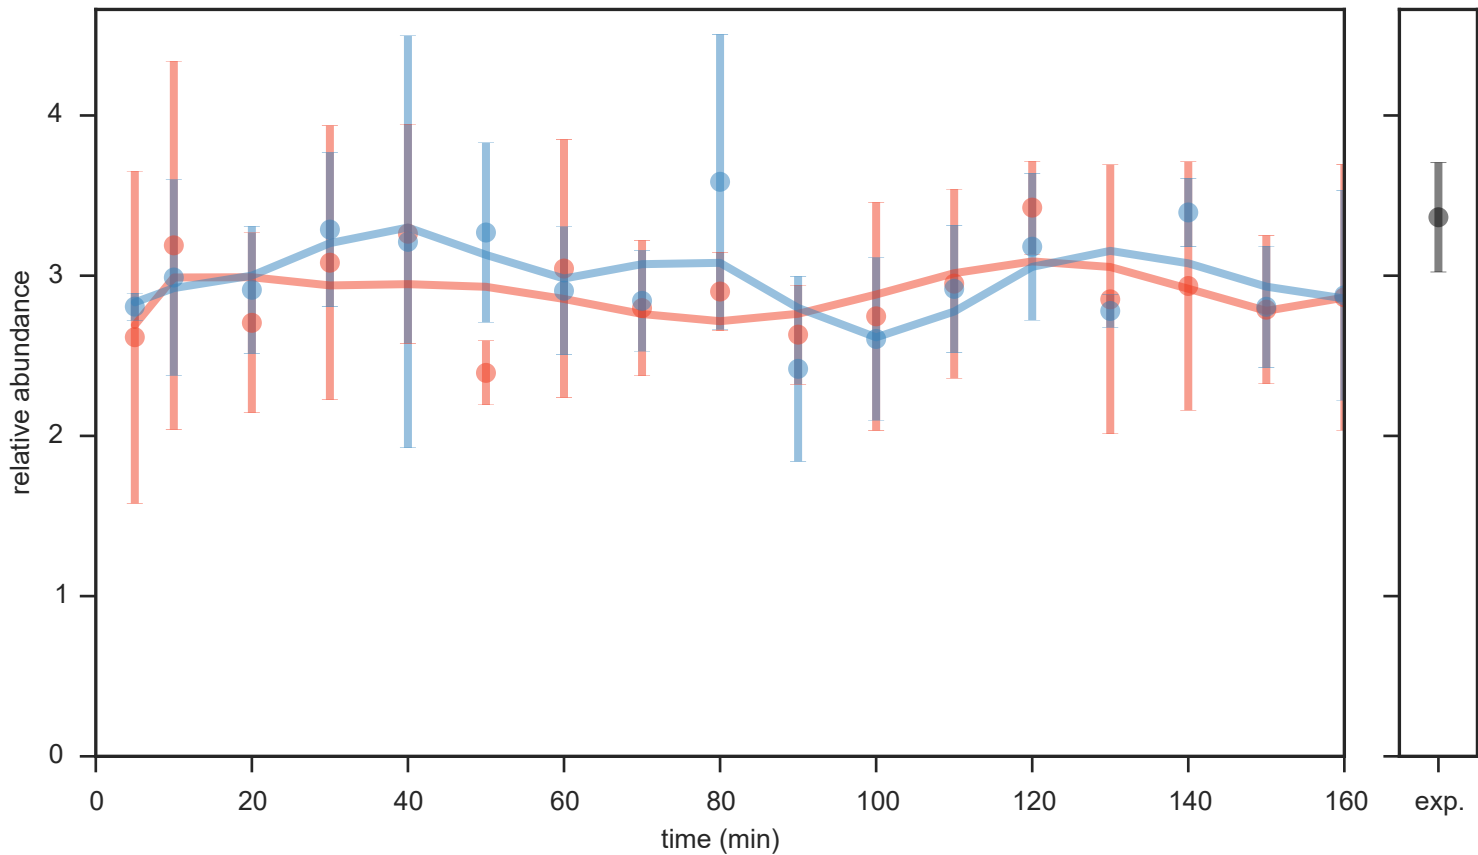

idms\_pid36\_mz130.09

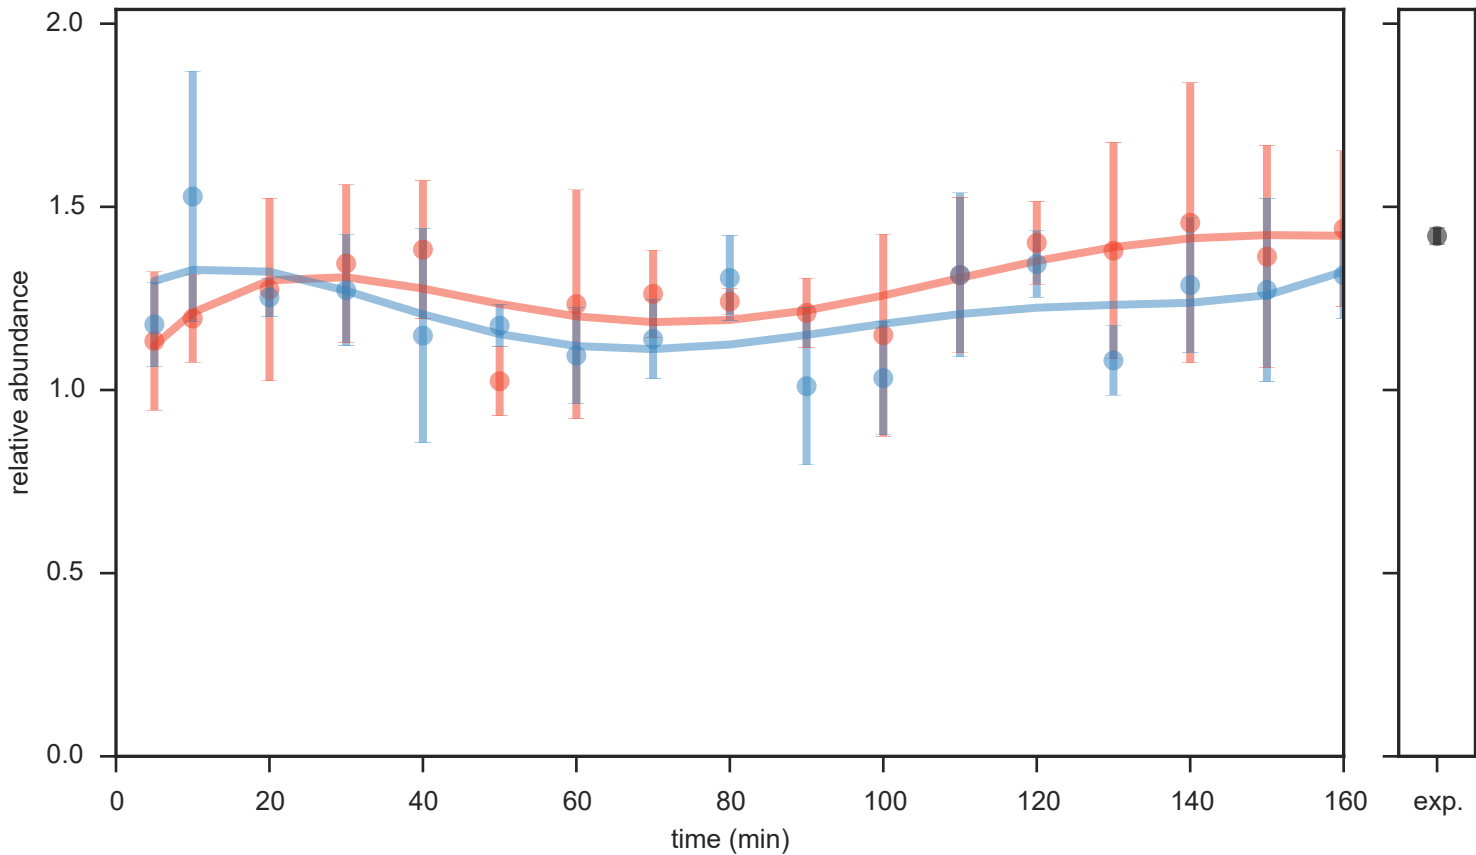

idms\_pid37\_mz195.99

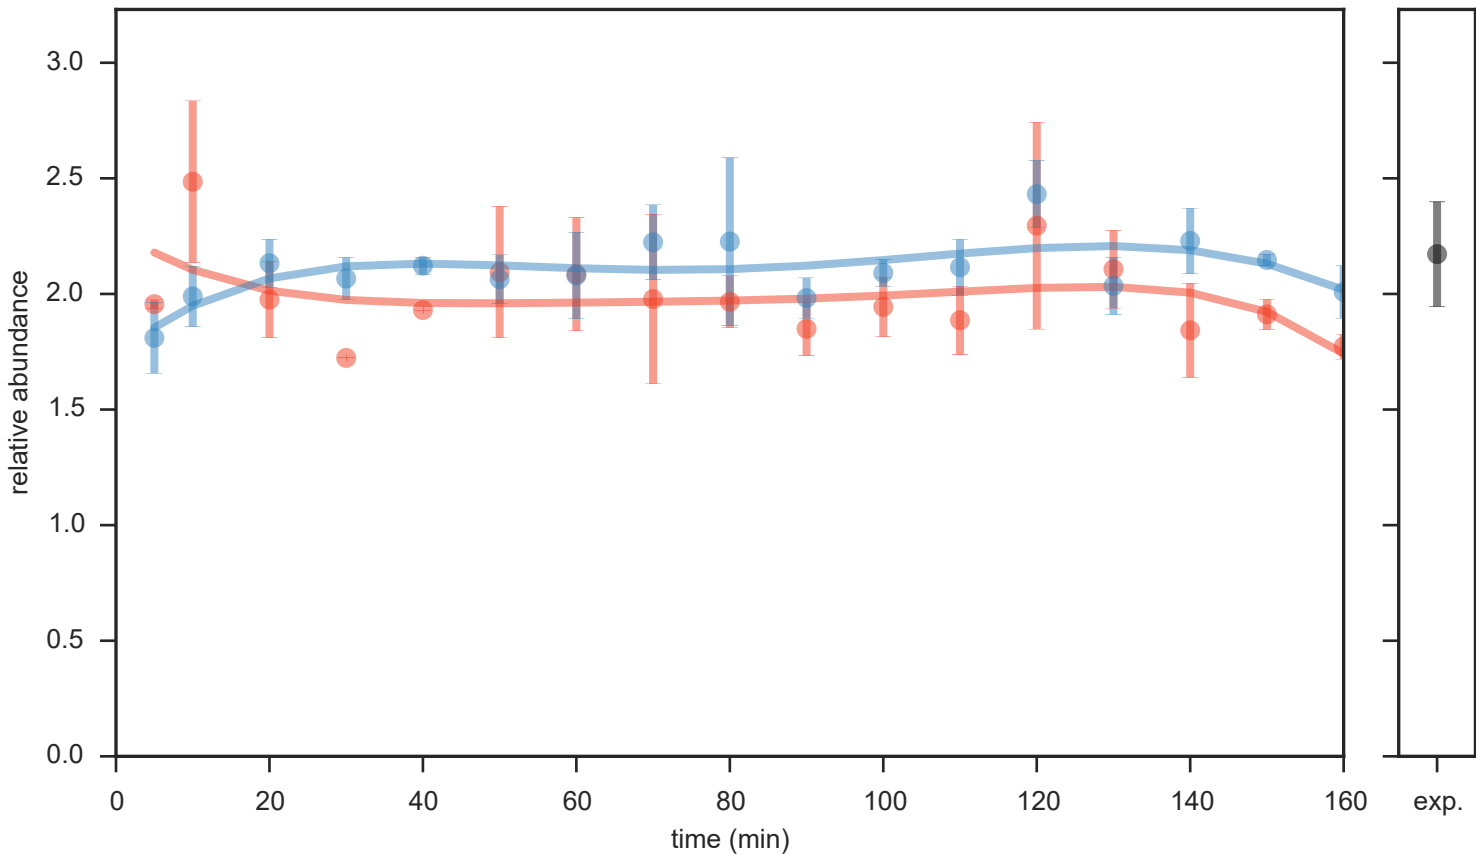

idms\_pid38\_mz208.11

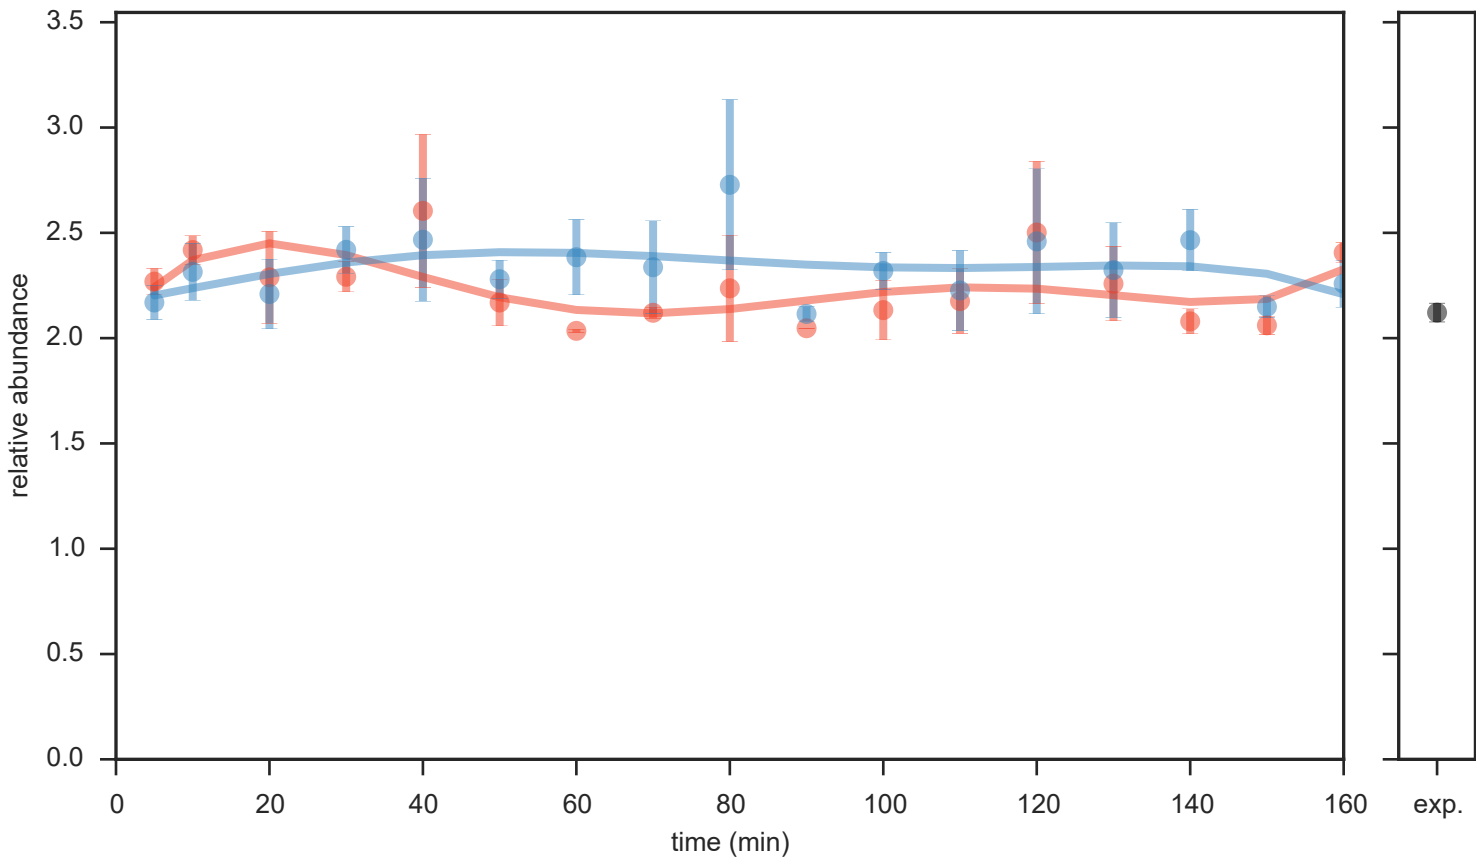



idms\_pid40\_mz202.19

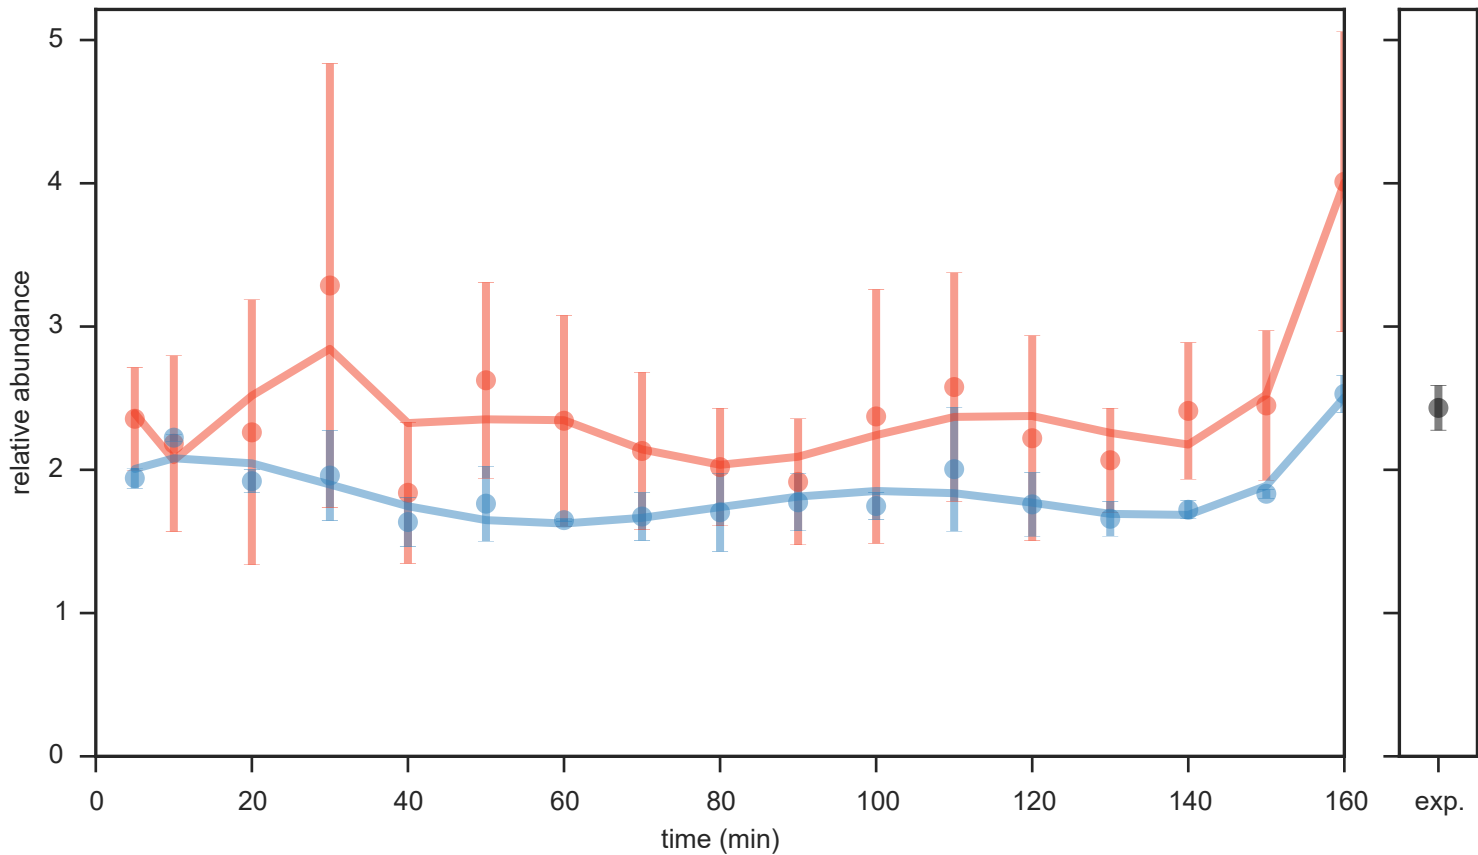

idms\_pid45\_mz156.07

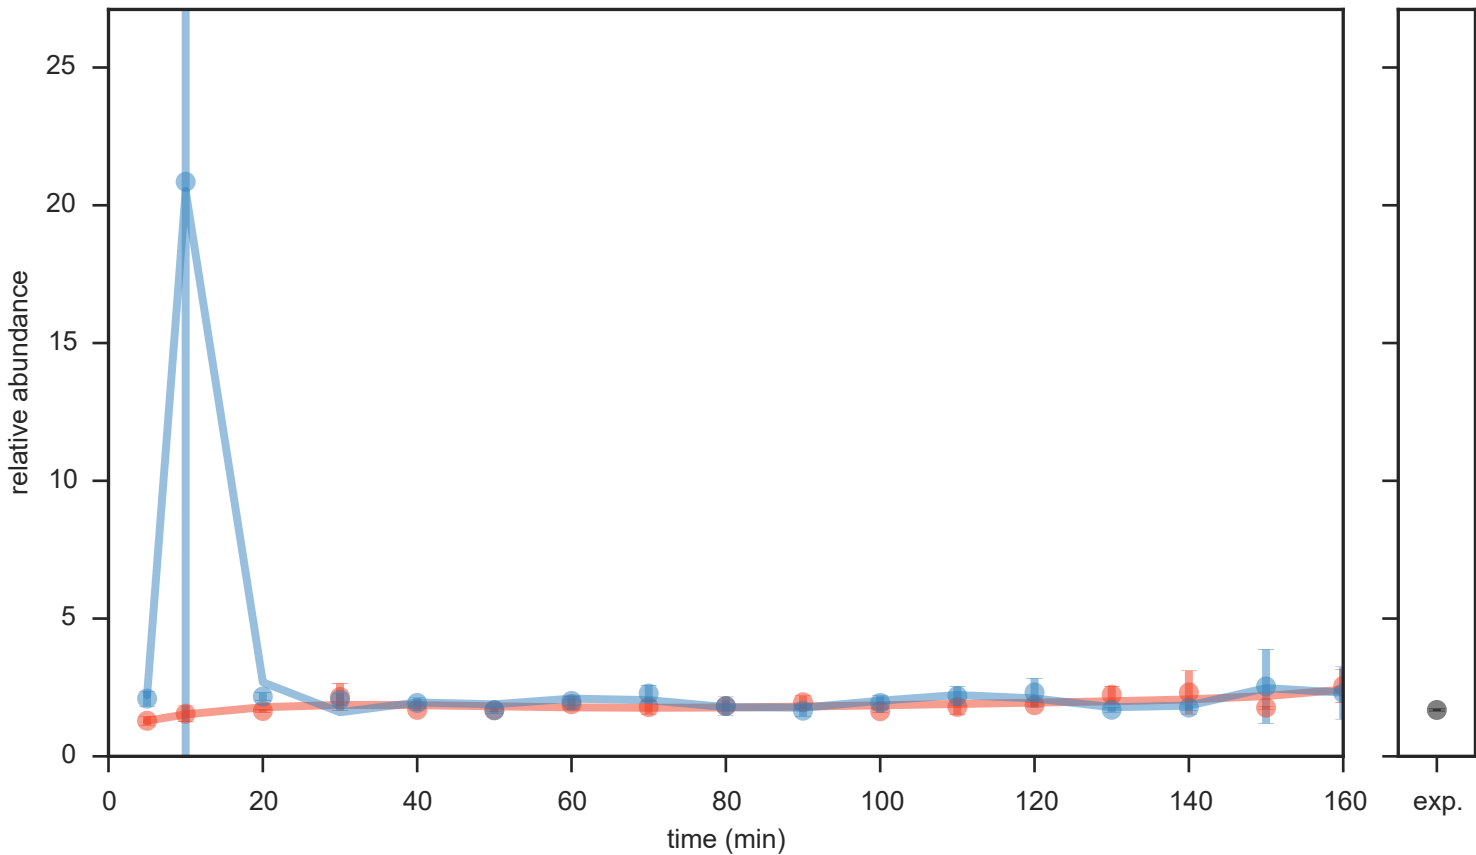

idms\_pid48\_mz298.09

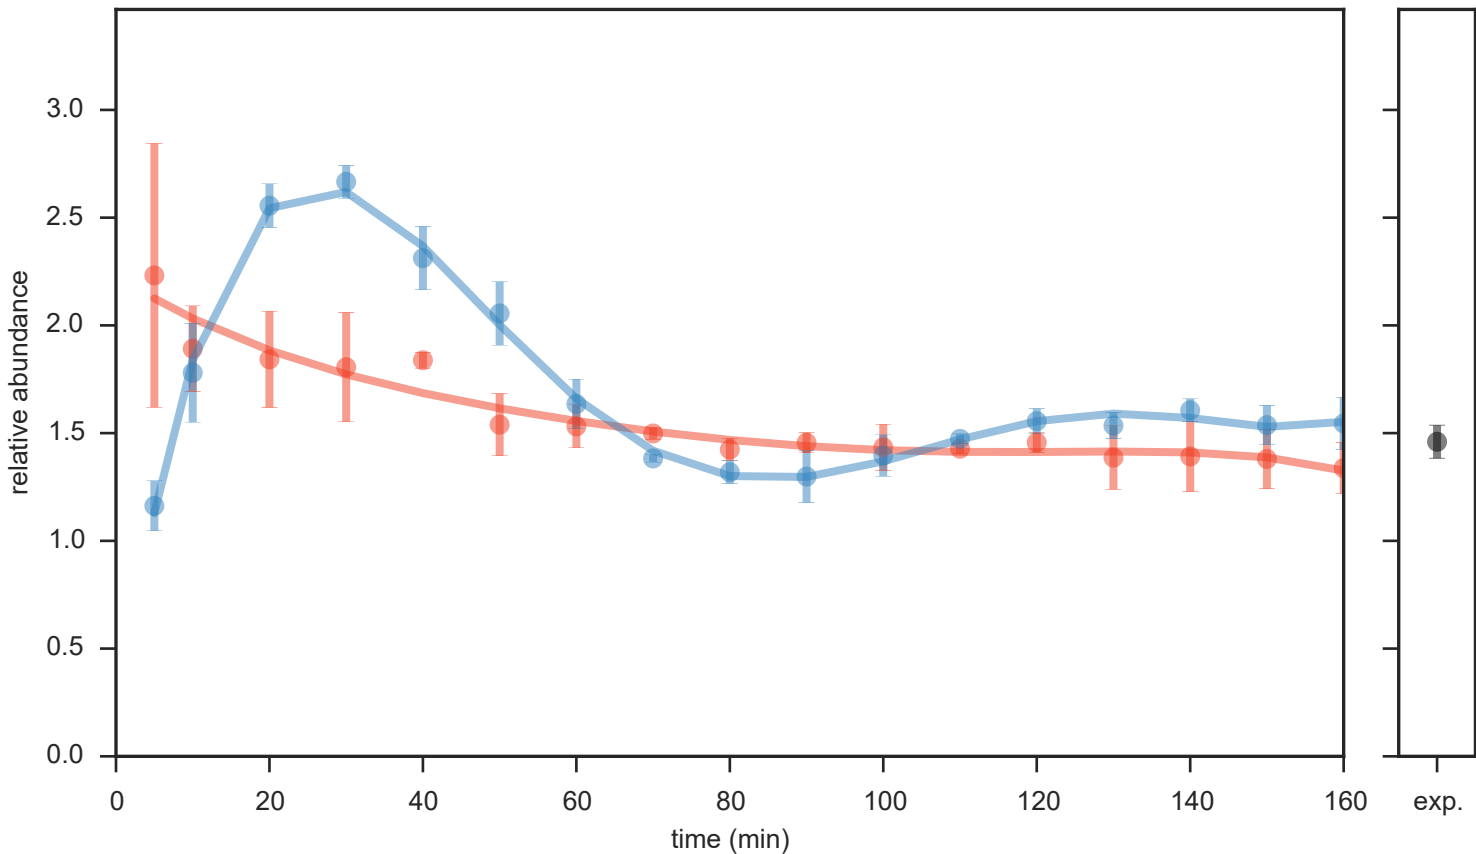

idms\_pid51\_mz291.11

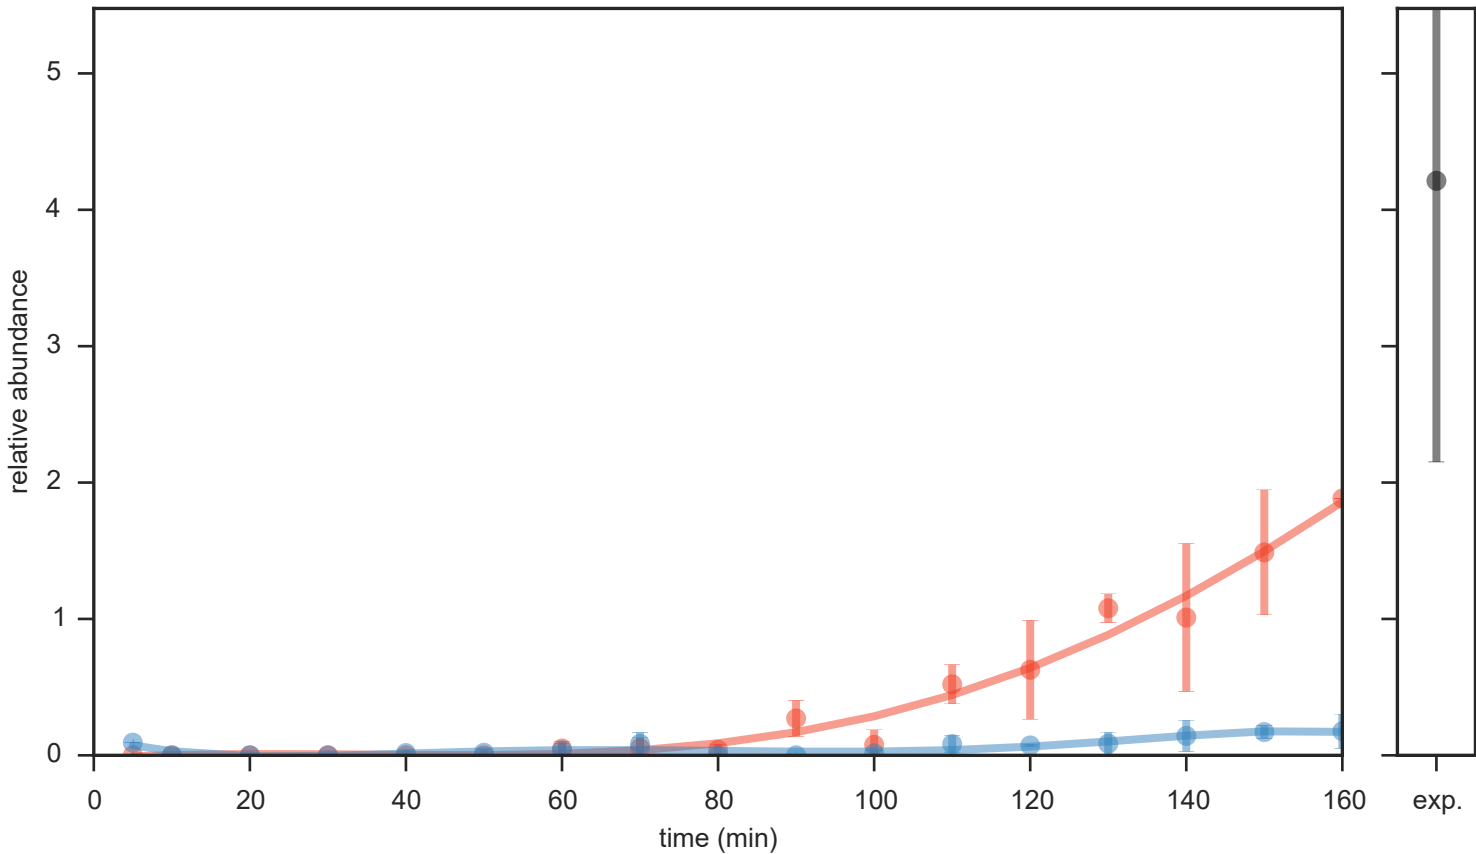

idms\_pid55\_mz344.21

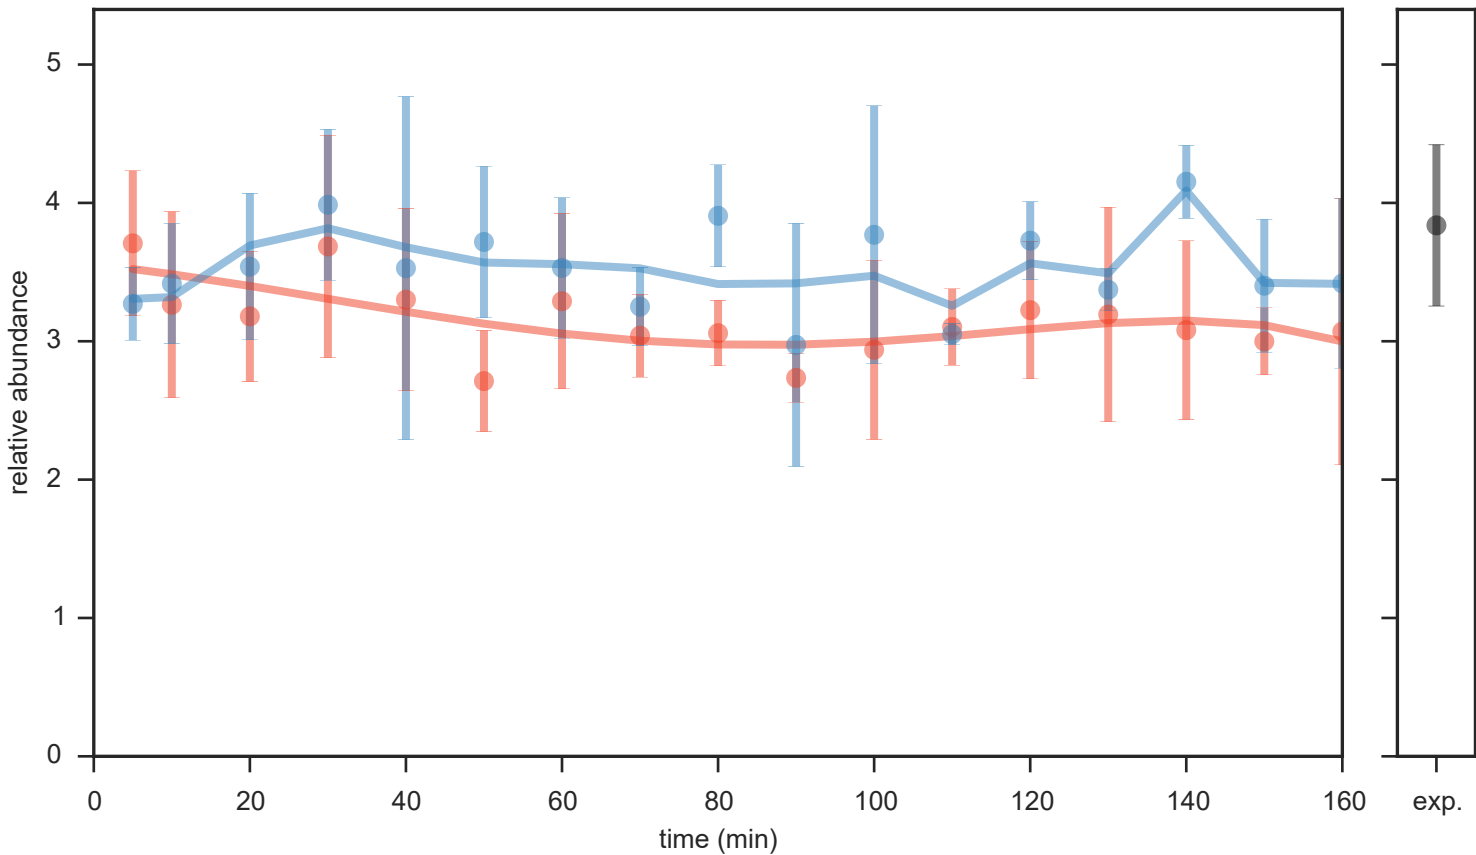

idms\_pid63\_mz306.12

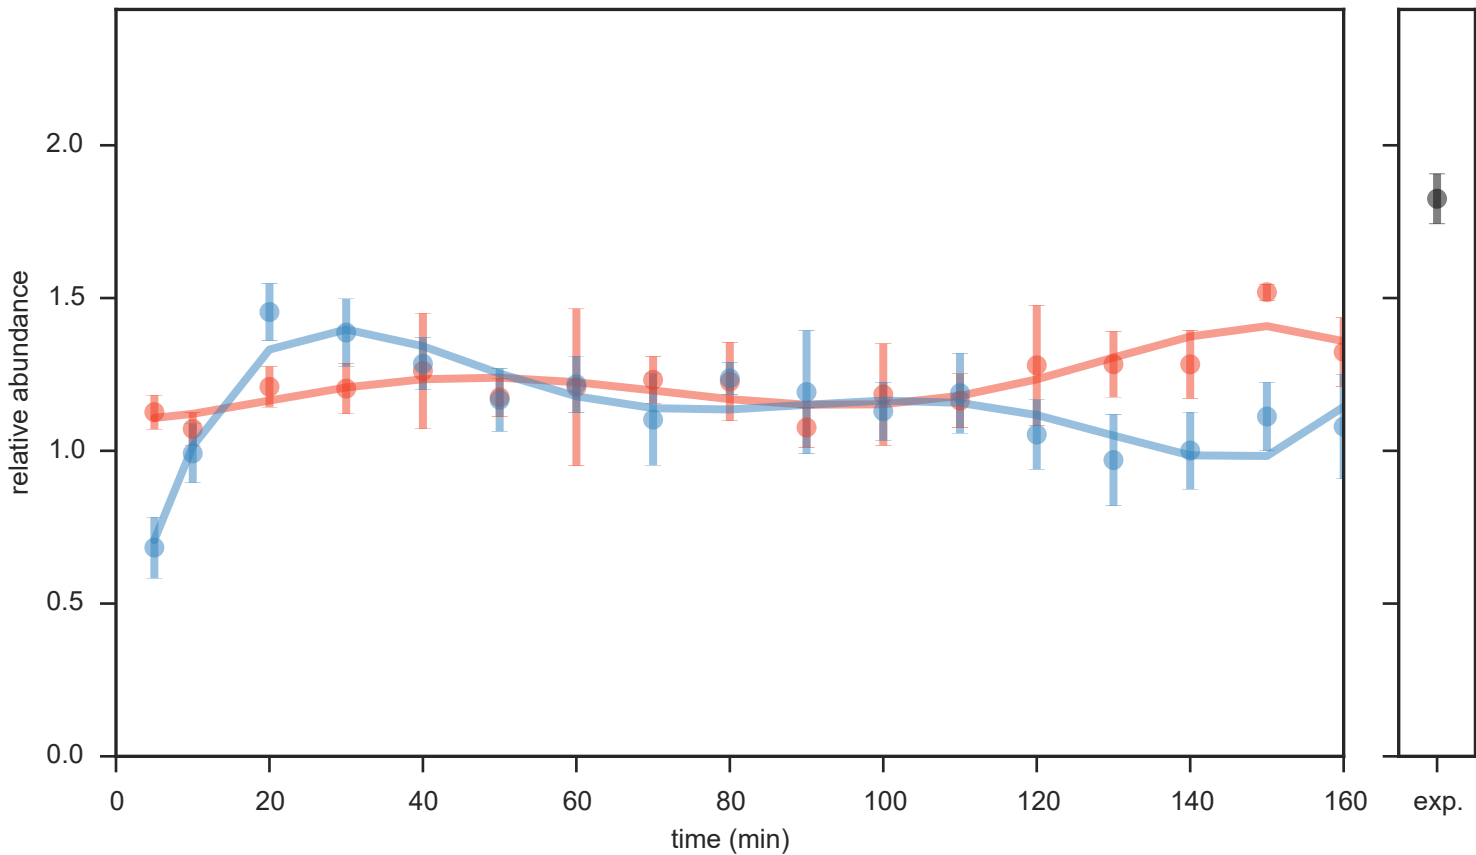

idms\_pid65\_mz180.08

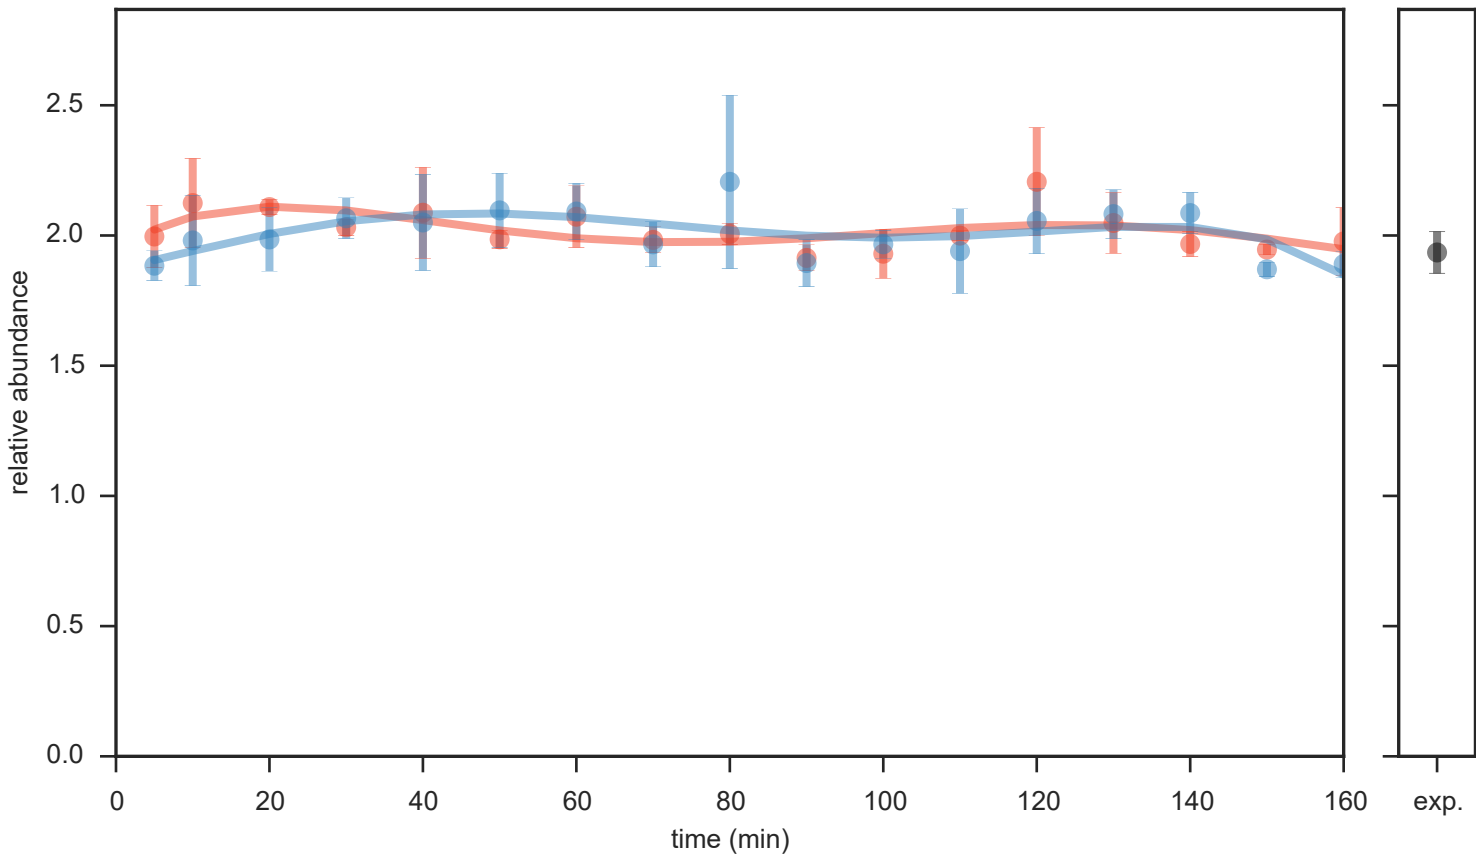

idms\_pid68\_mz399.14

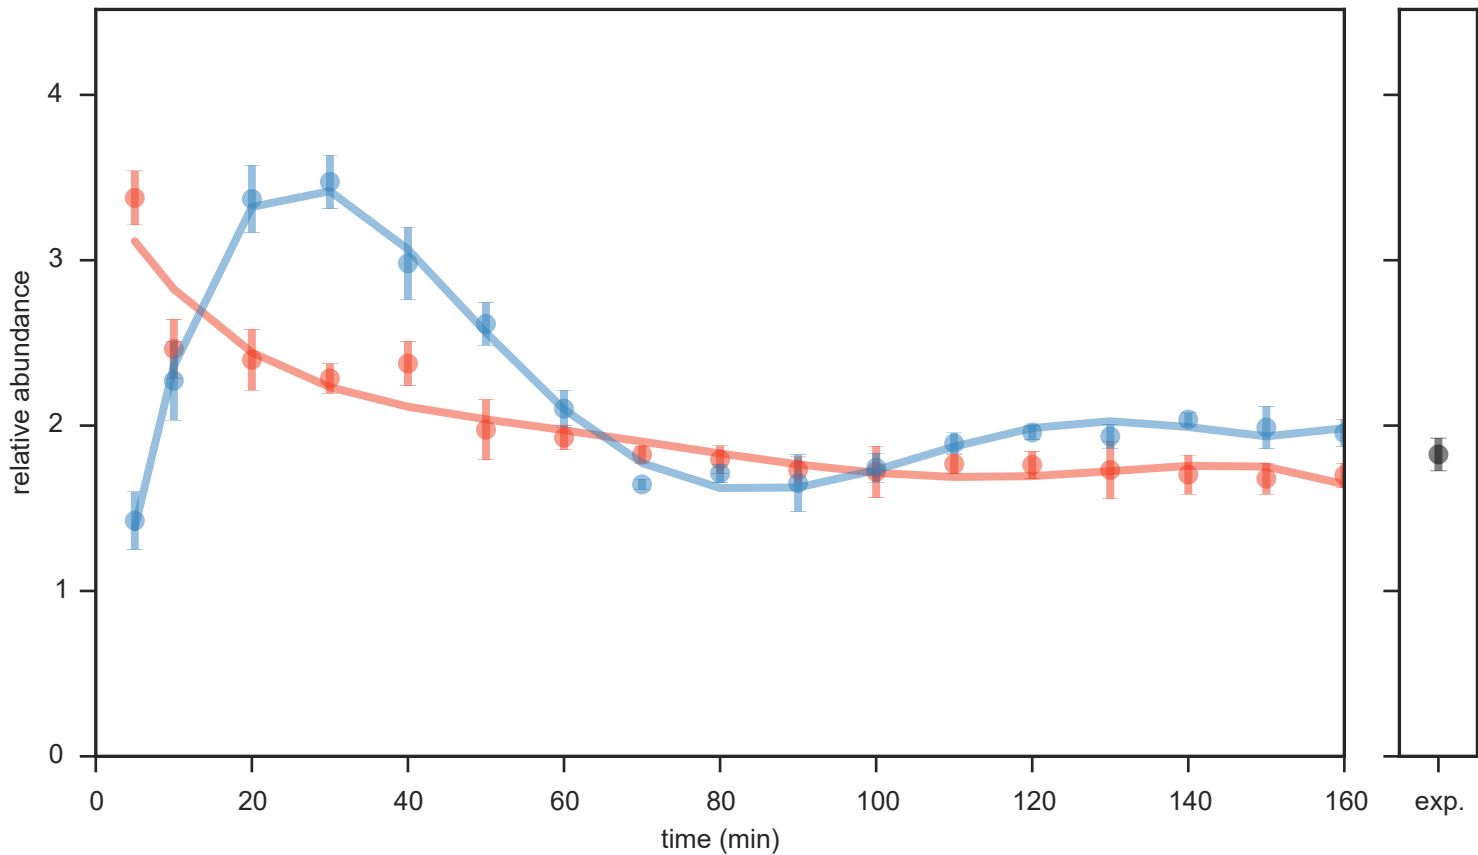



idms\_pid70\_mz90.054

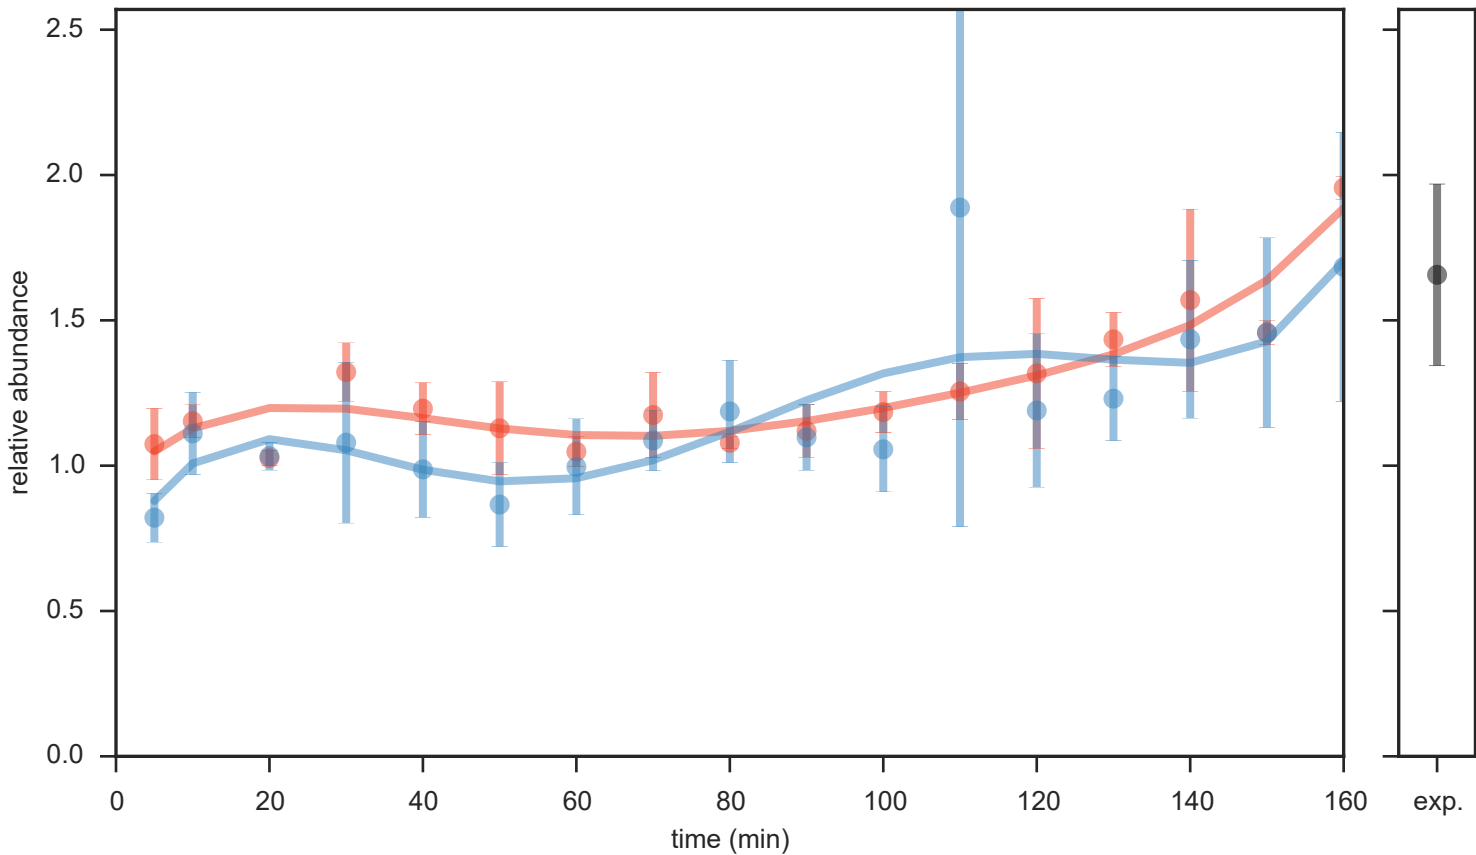

idms\_pid73\_mz161.09

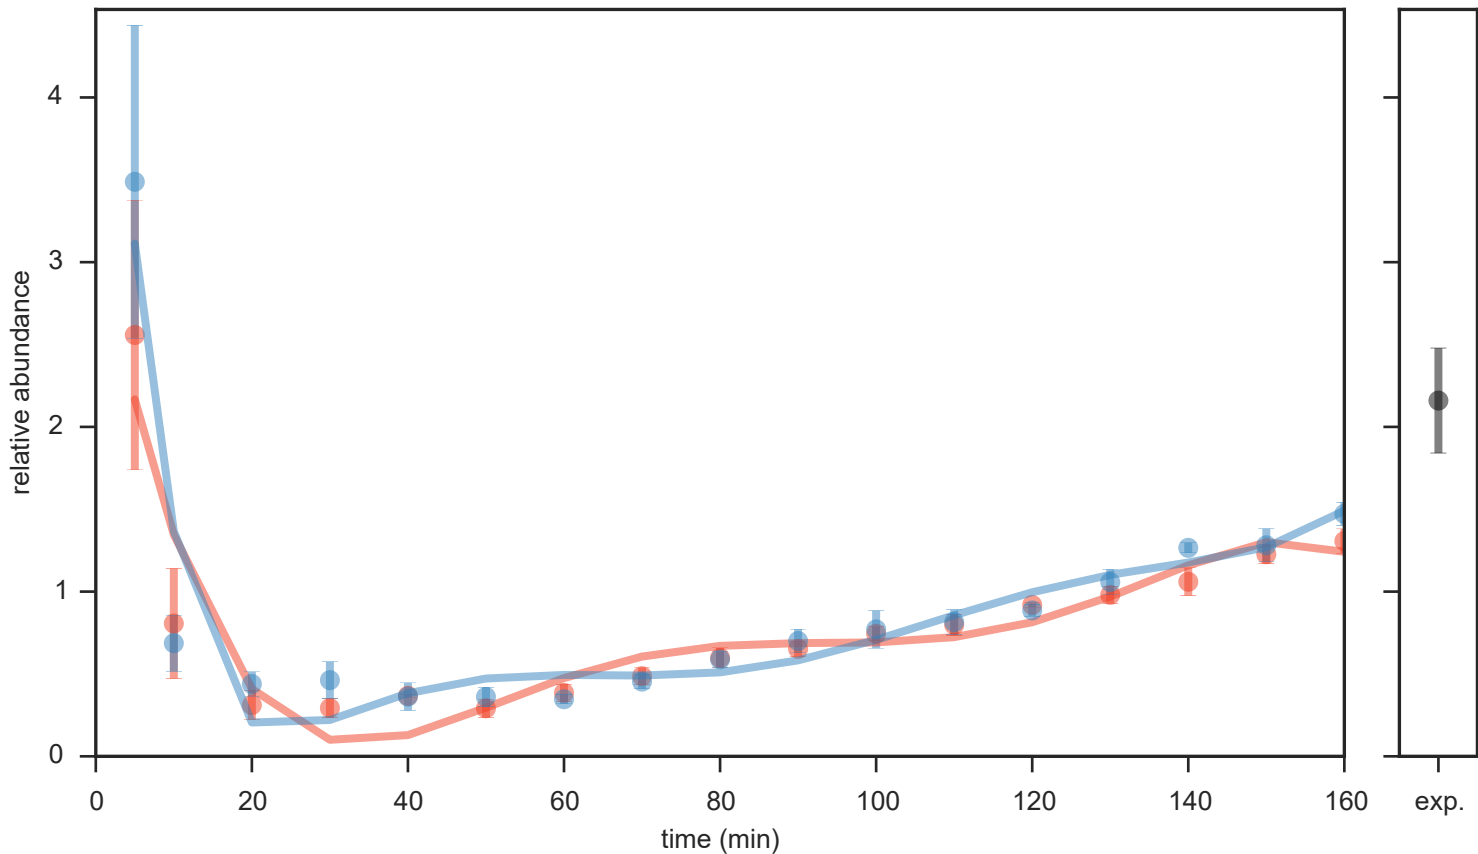

idms\_pid76\_mz176.10

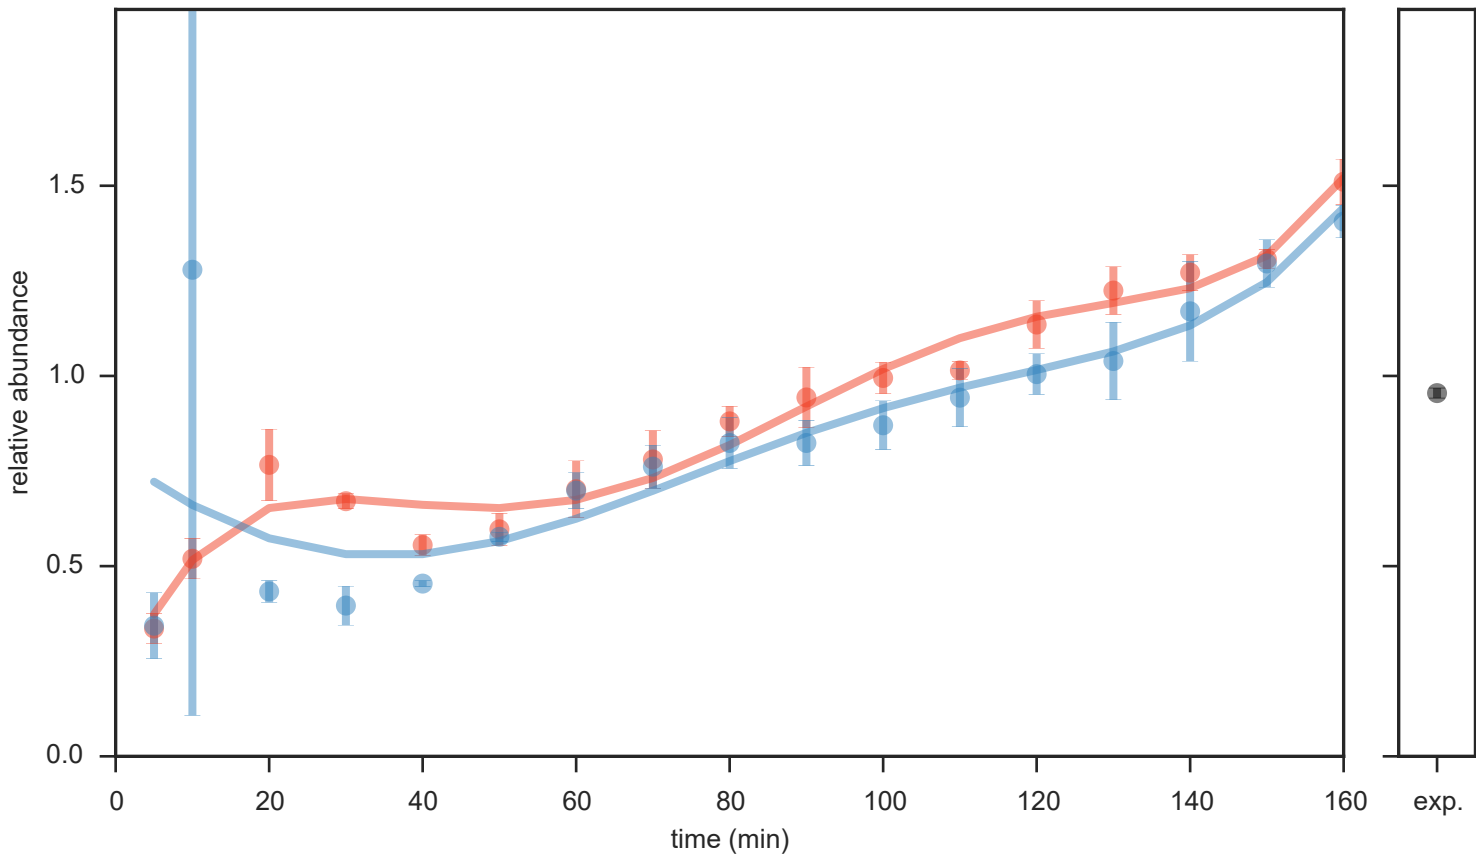

idms\_pid78\_mz180.08

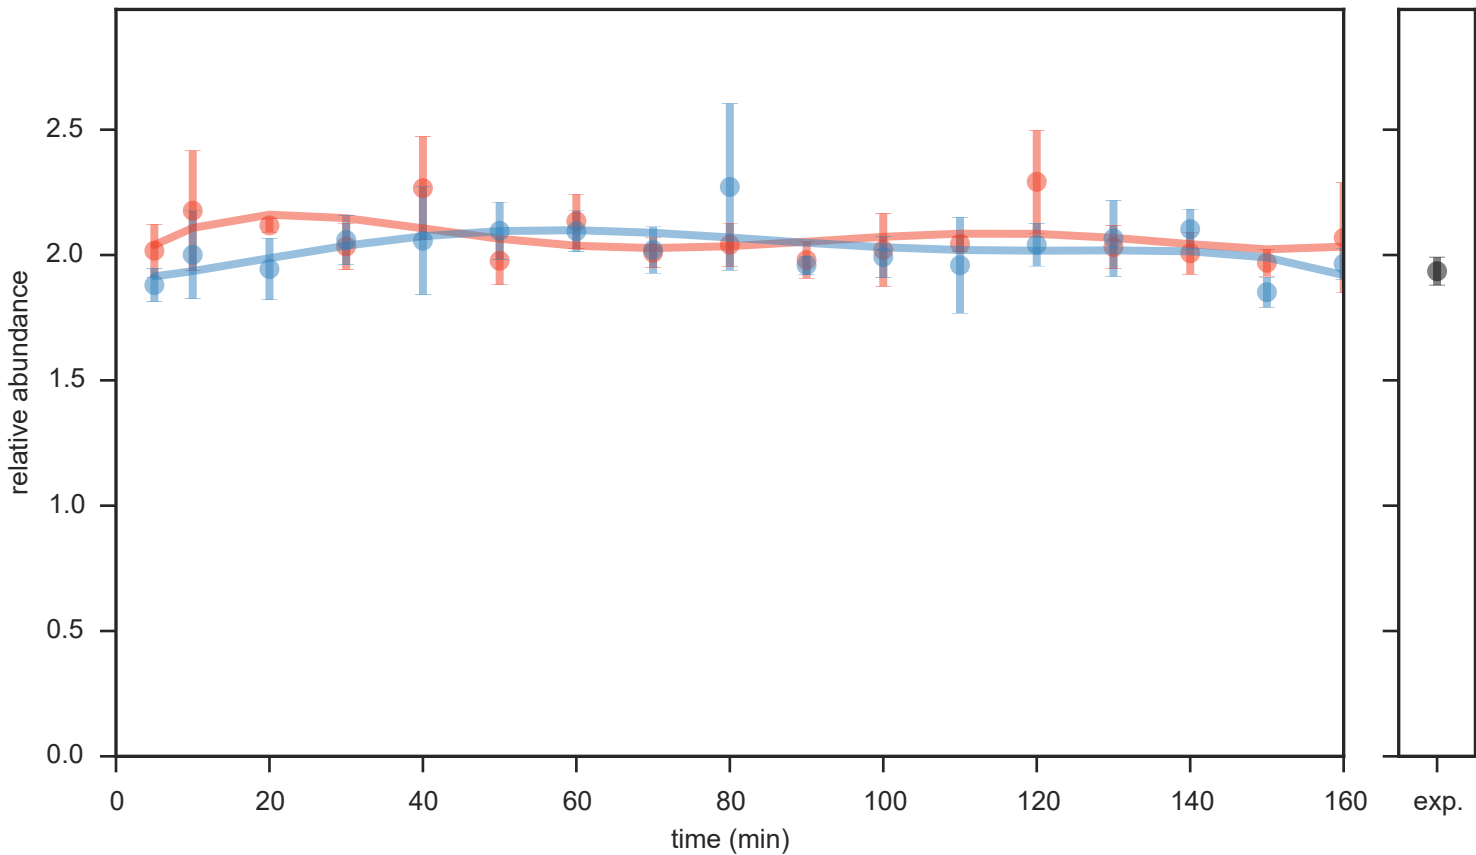

idms\_pid81\_mz116.07

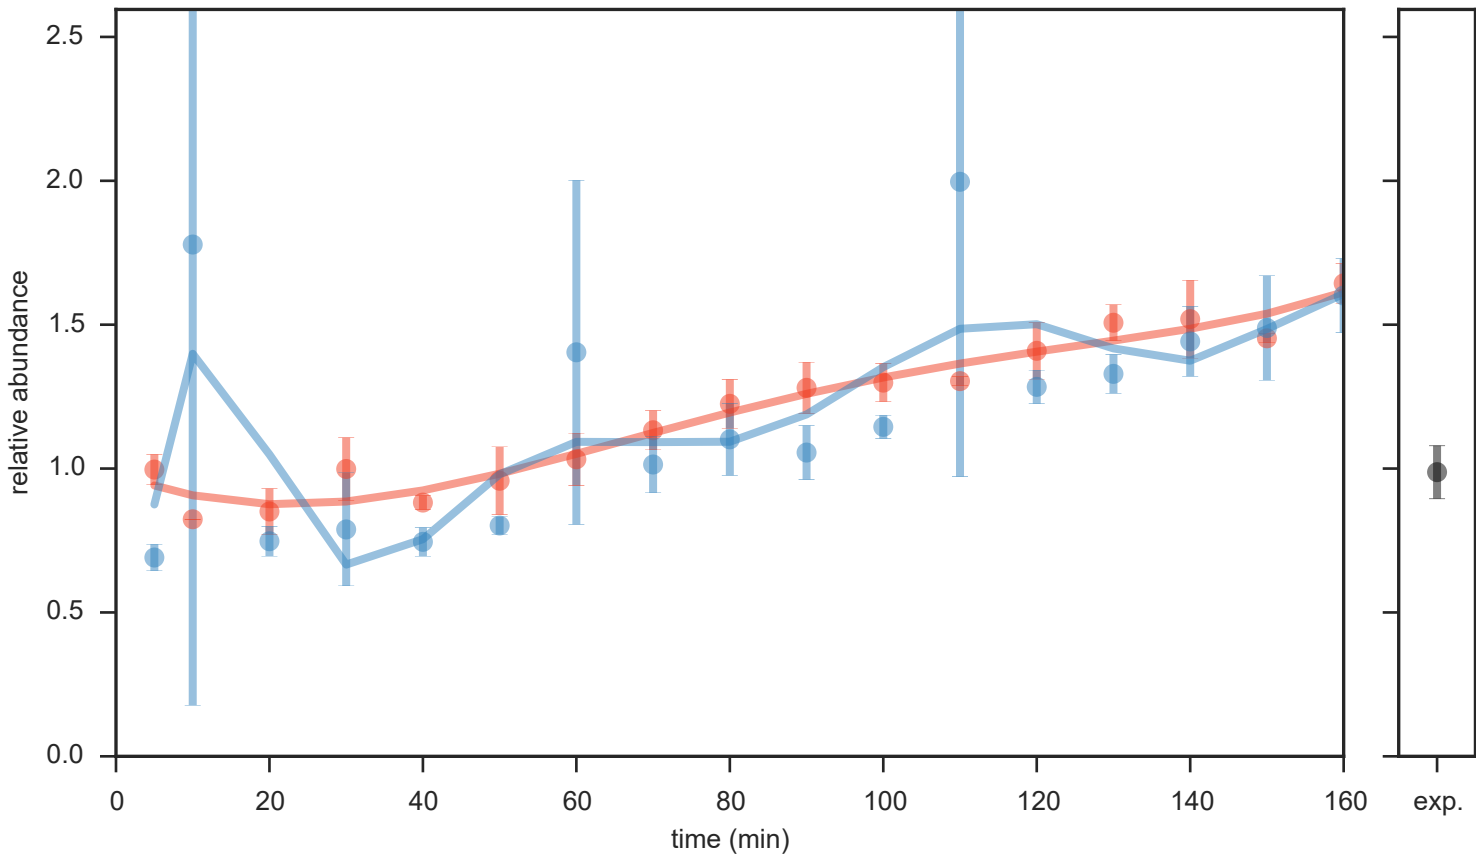

idms\_pid84\_mz341.13

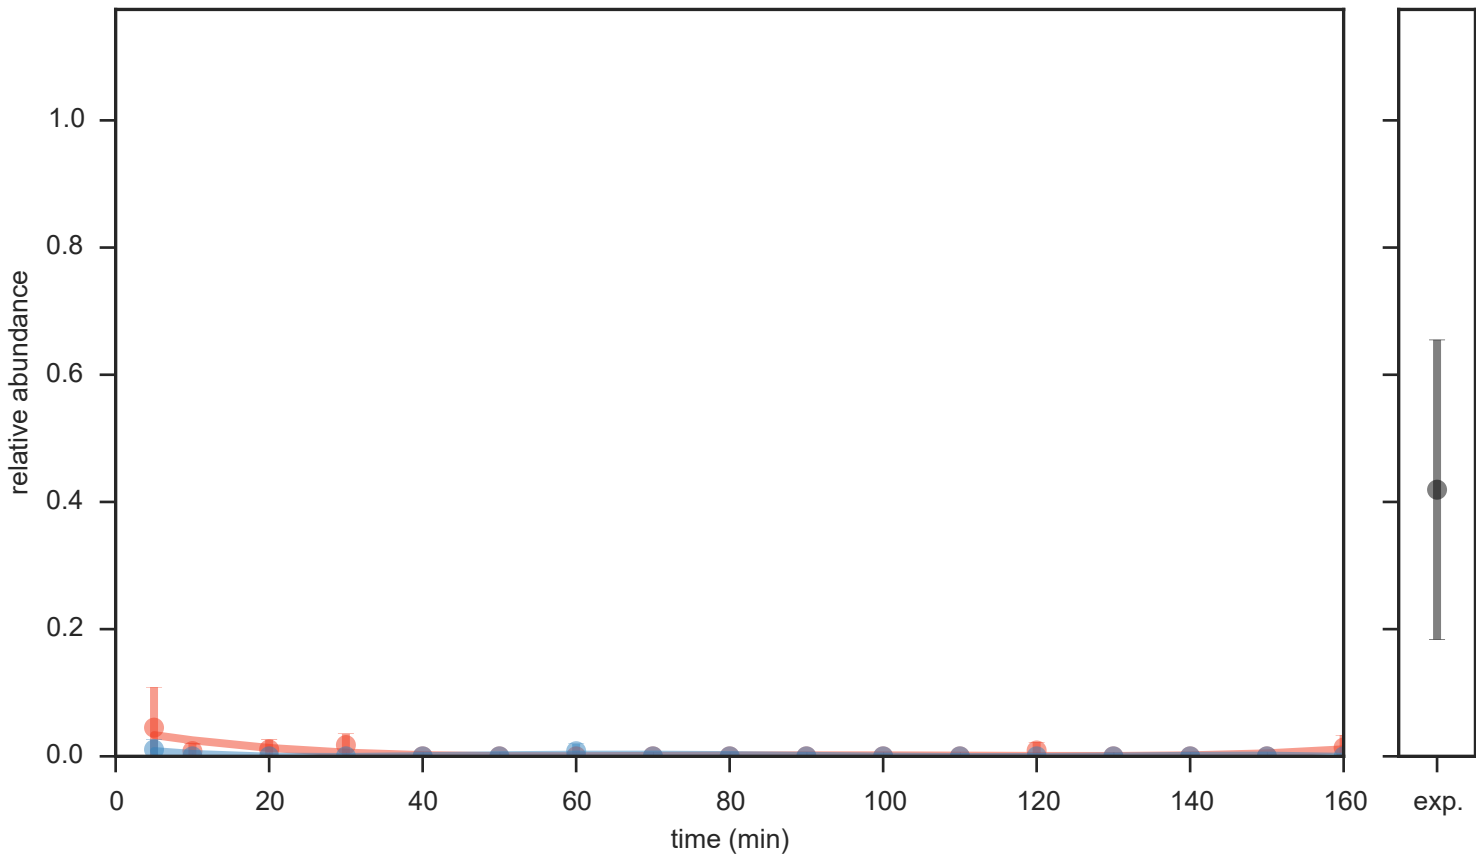

idms\_pid87\_mz152.05

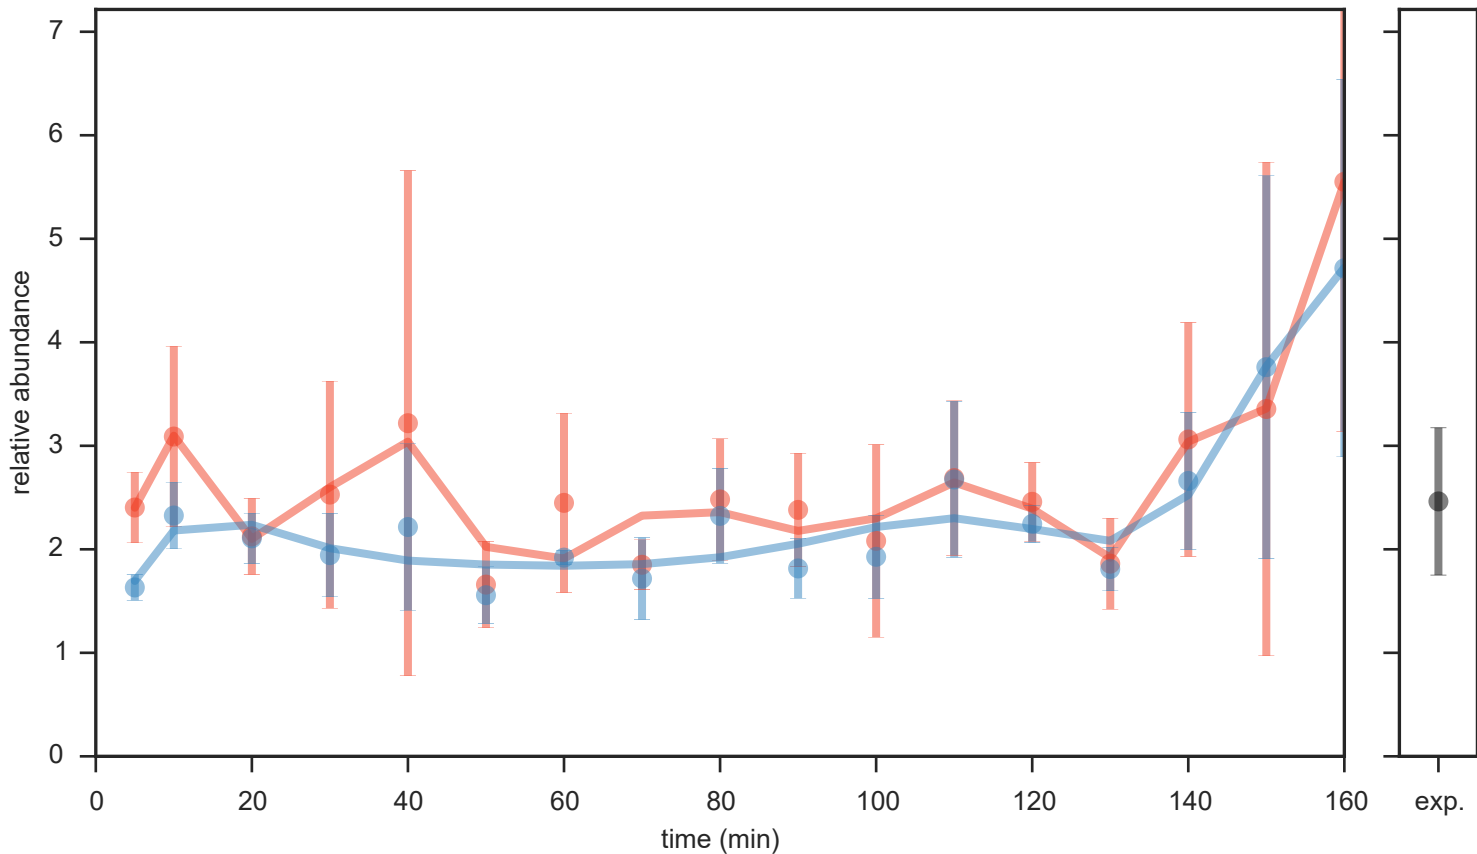

idms\_pid89\_mz168.14

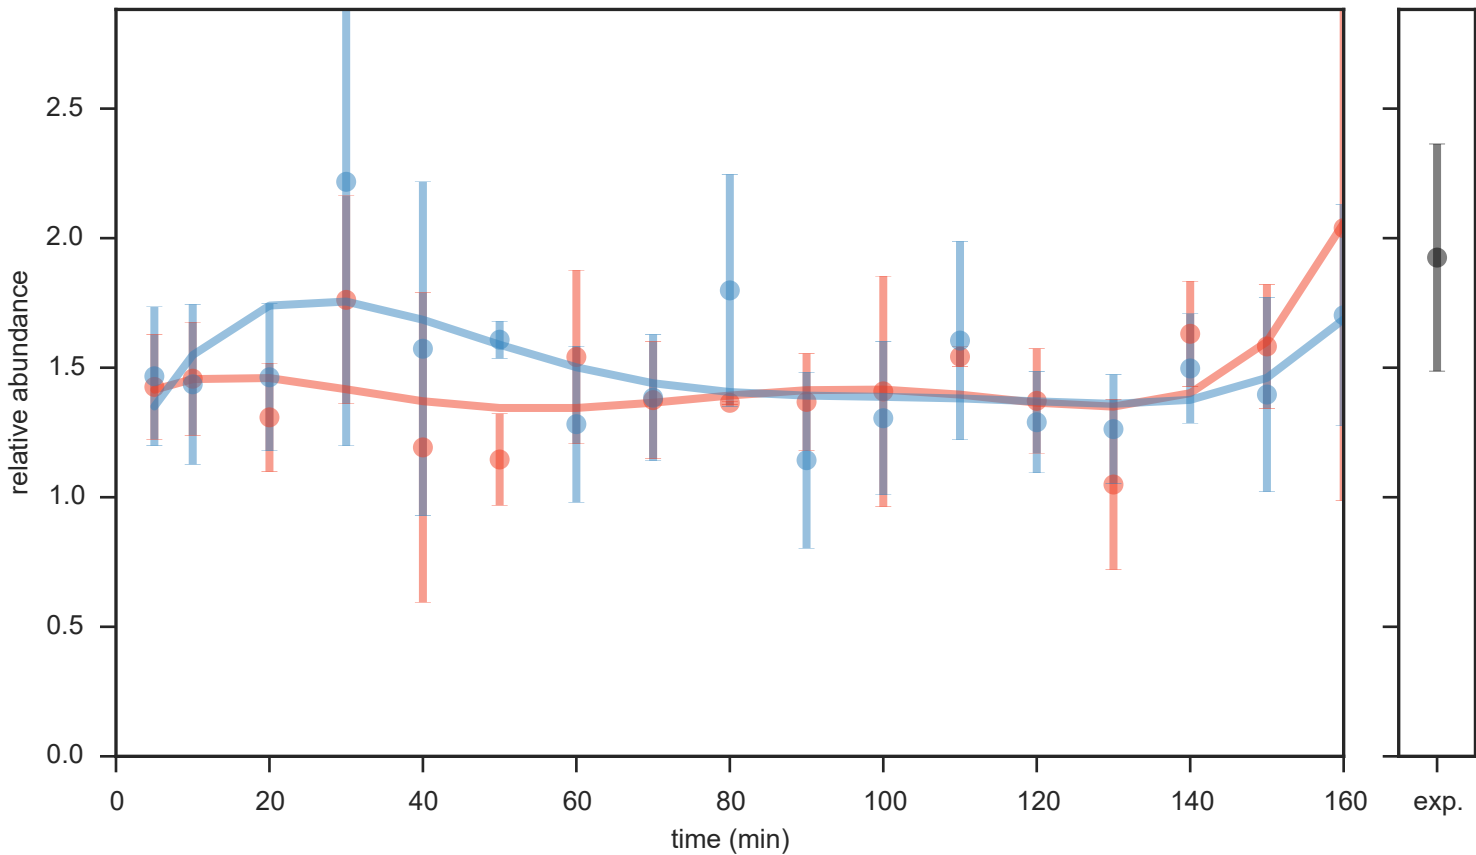



idms\_pid92\_mz132.10

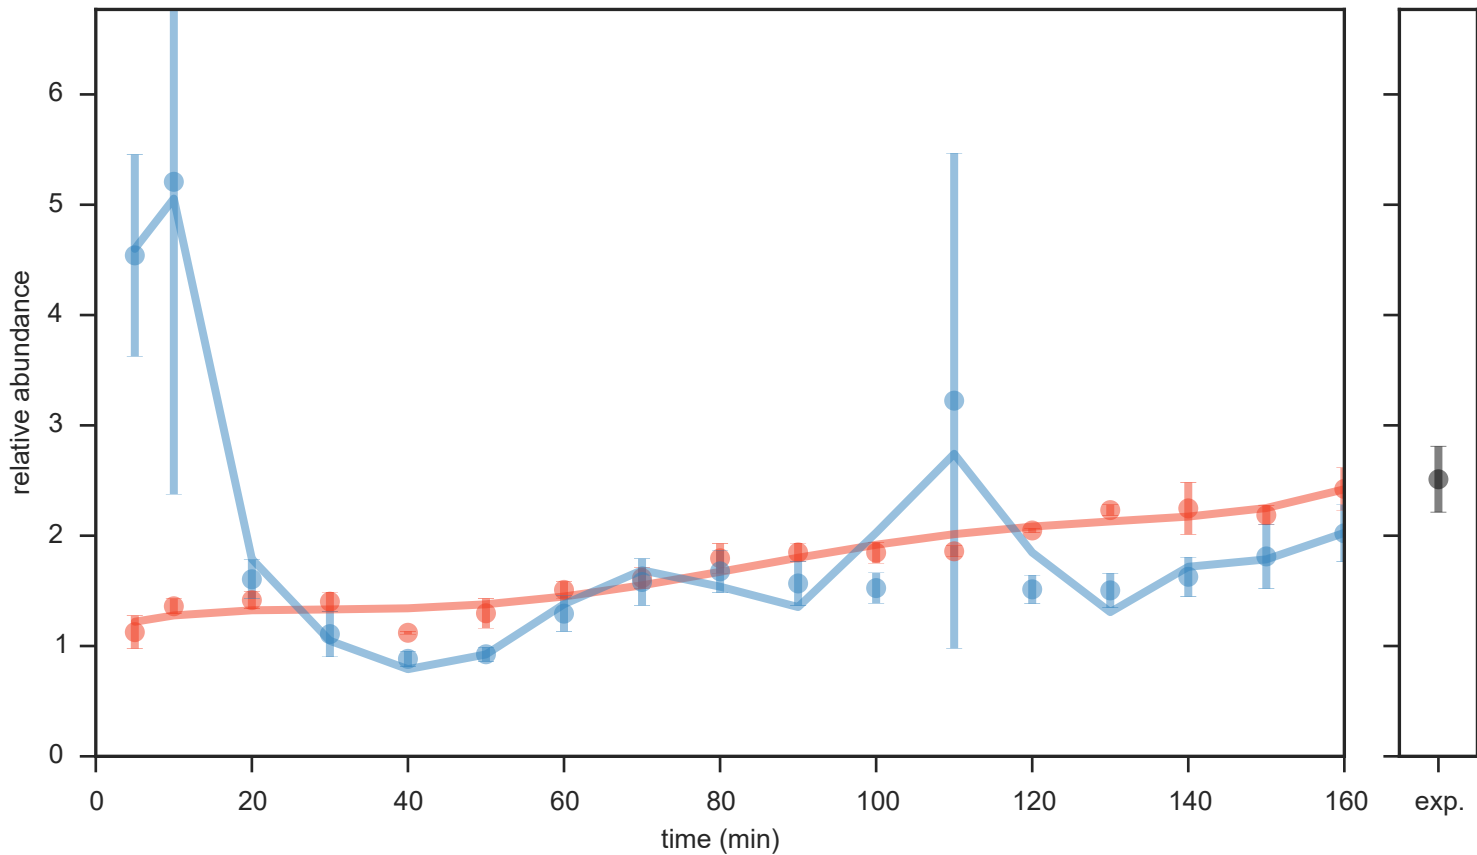

idms\_pid97\_mz234.21

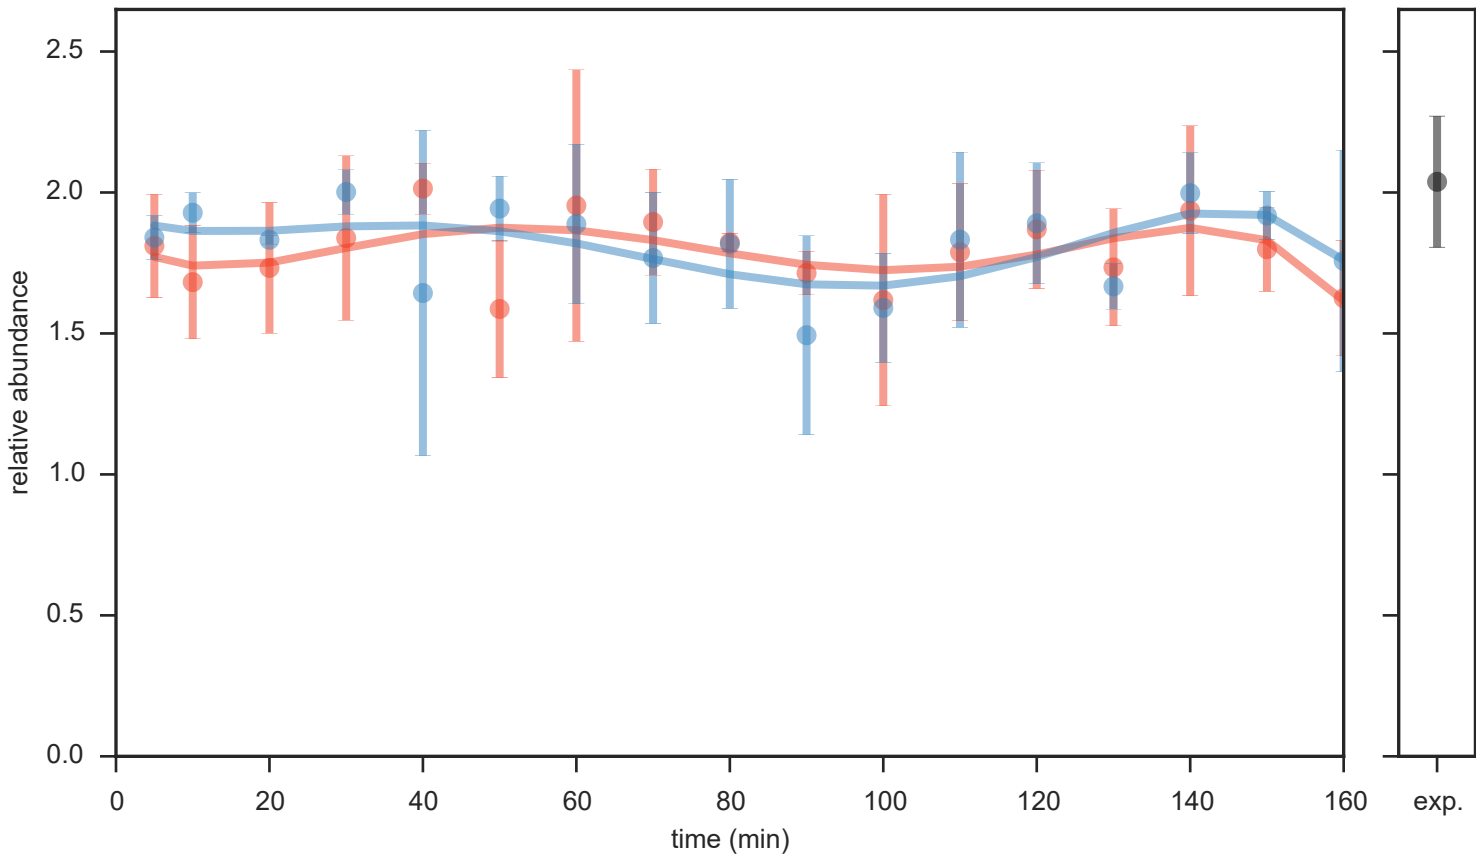

idms\_pid99\_mz162.07

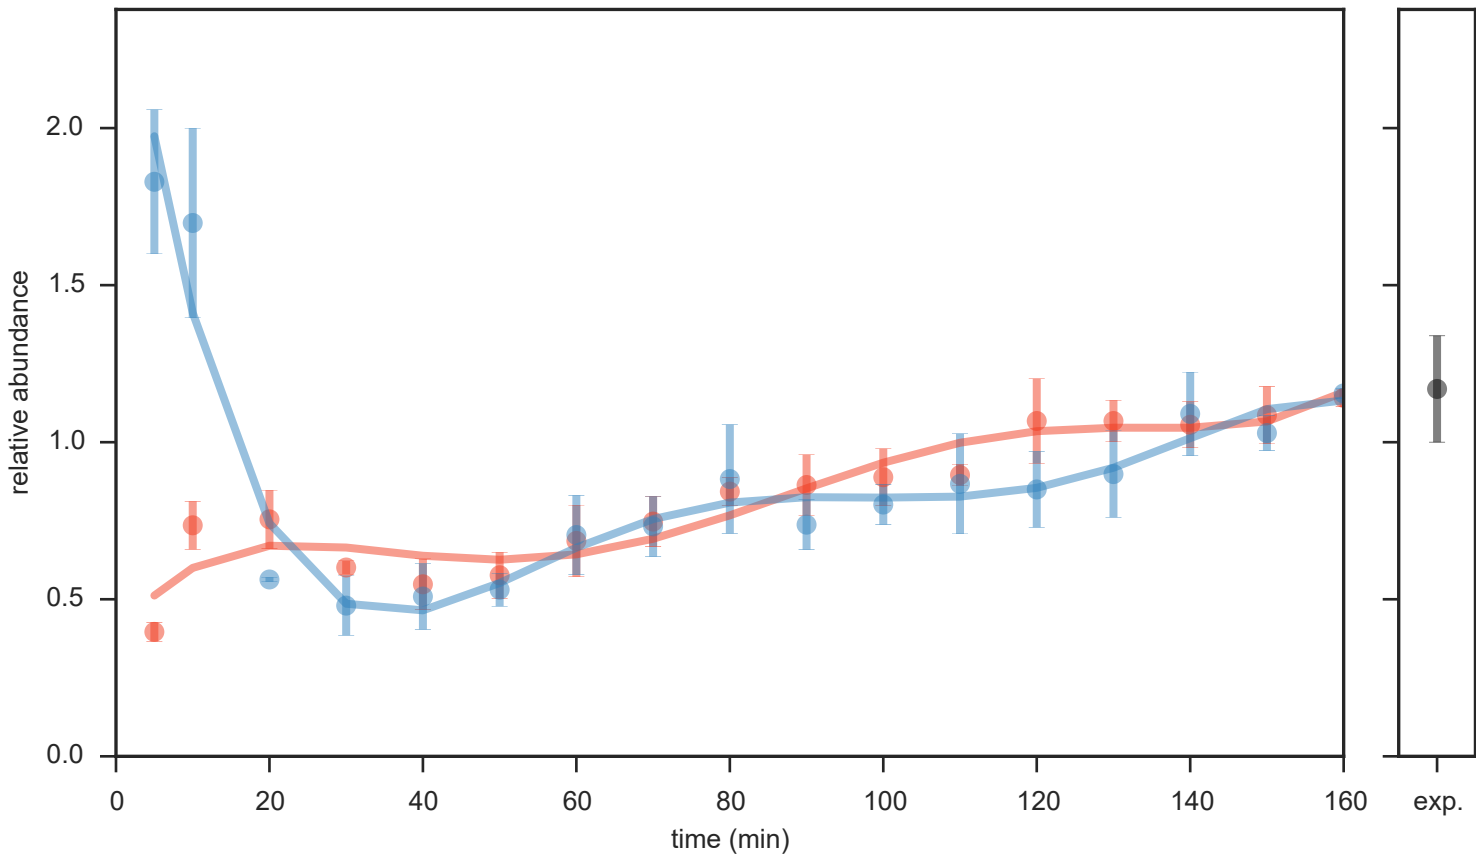

idms\_pid106\_mz237.09

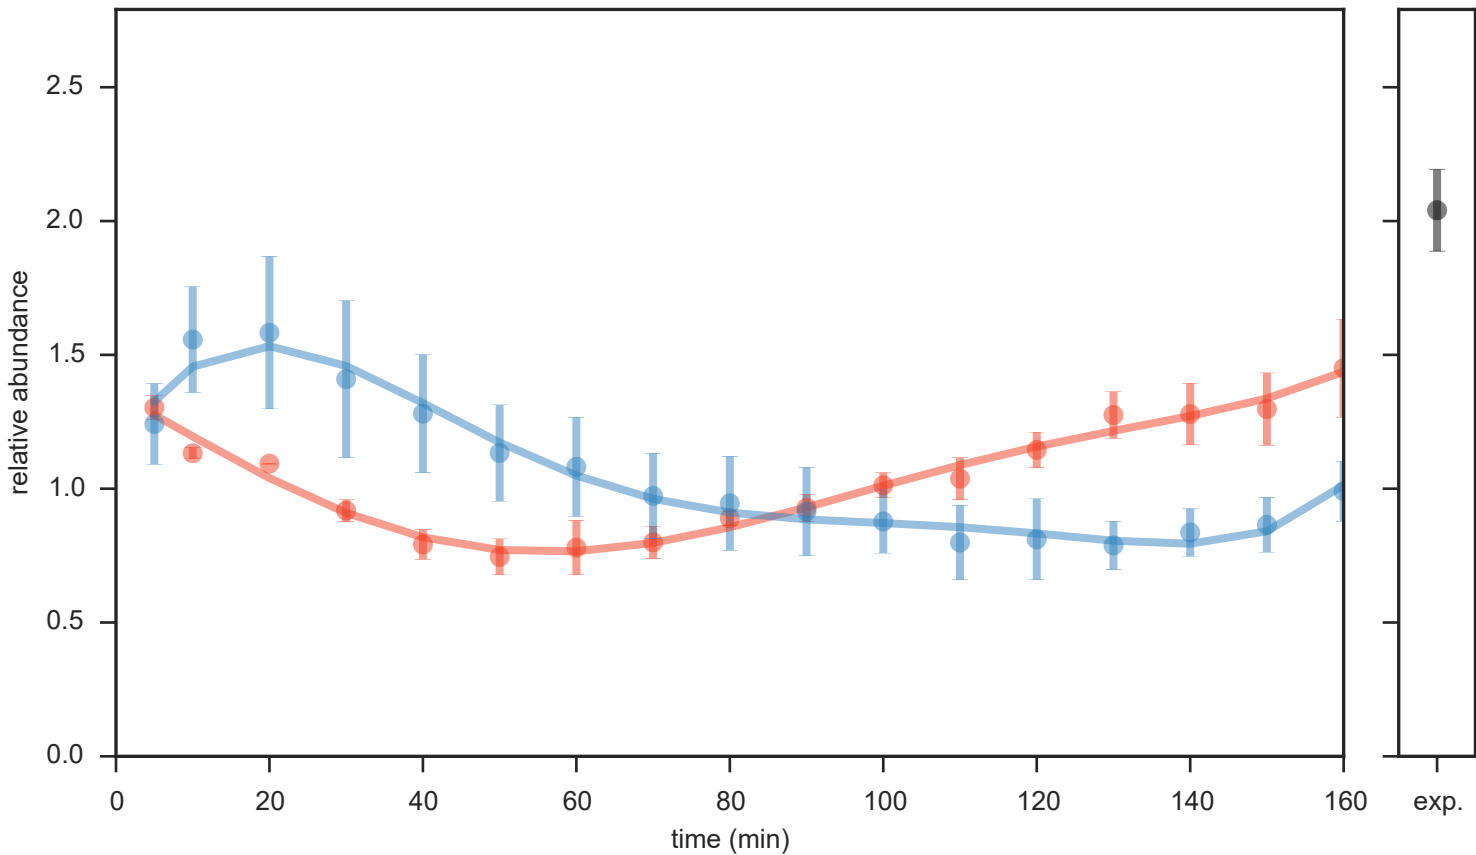

idms\_pid107\_mz148.06

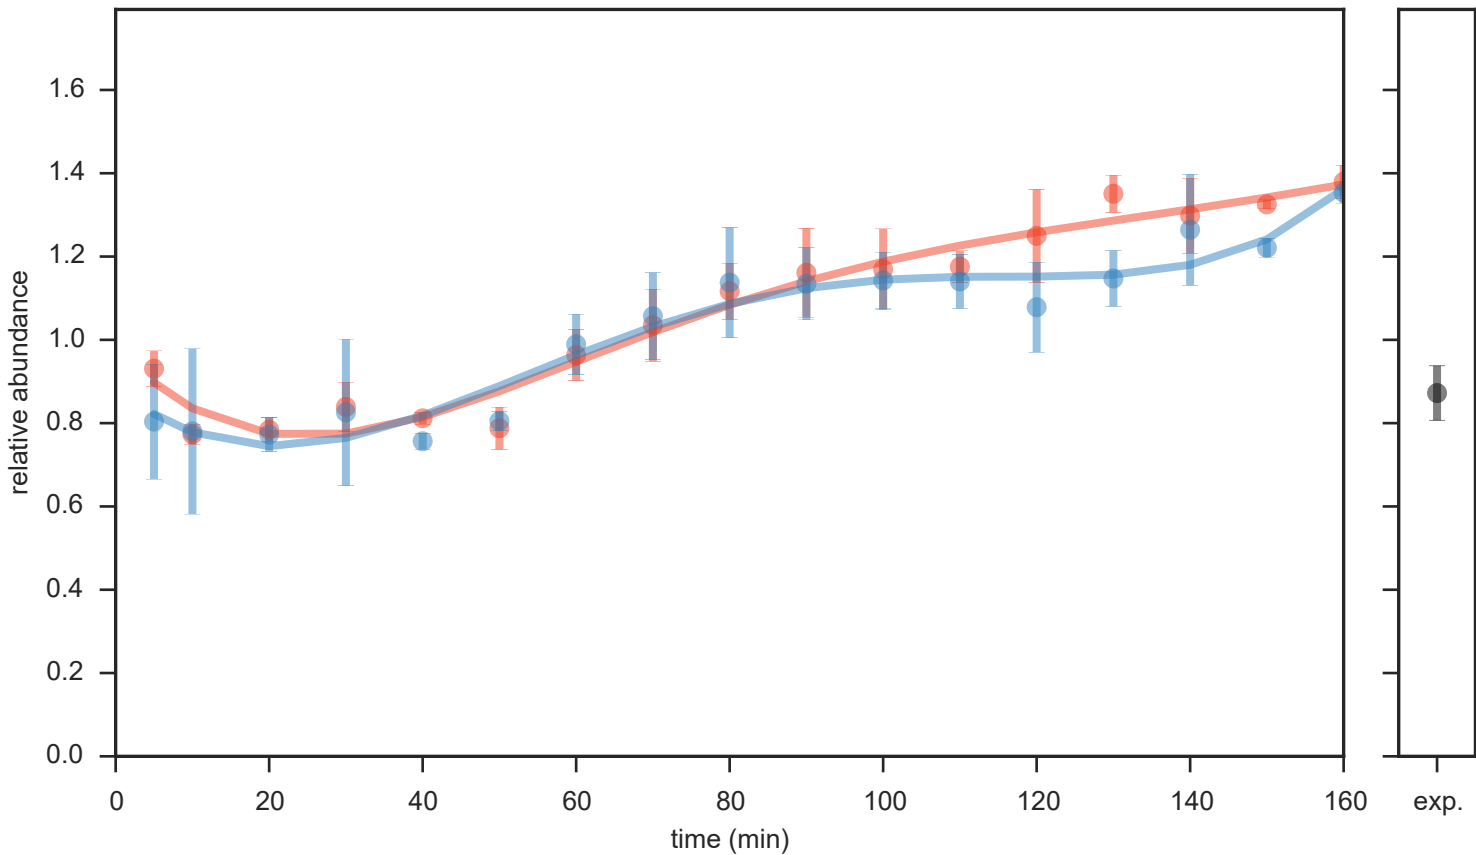

idms\_pid111\_mz308.09

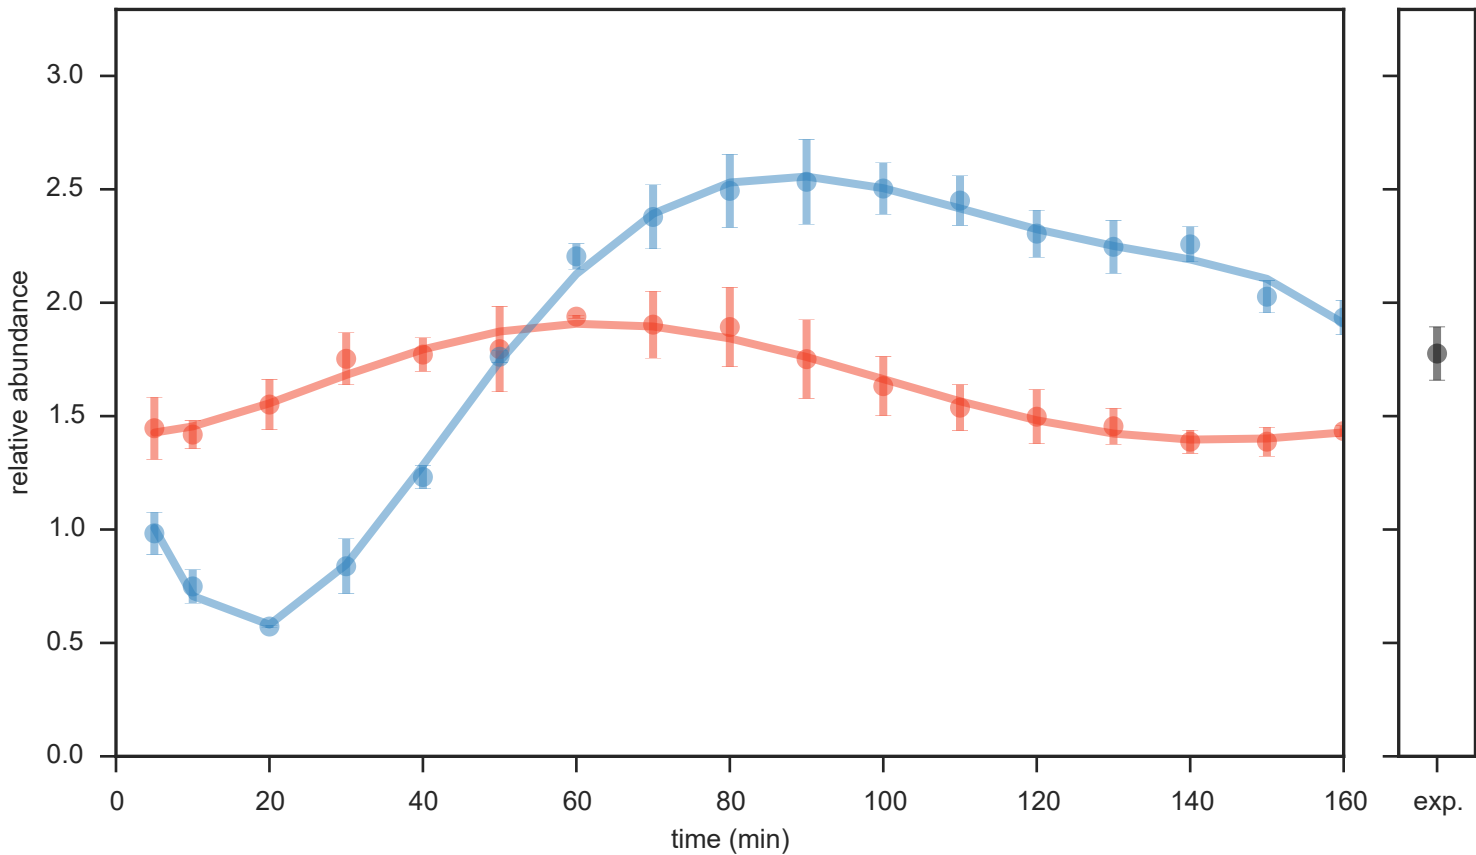

idms\_pid112\_mz150.05

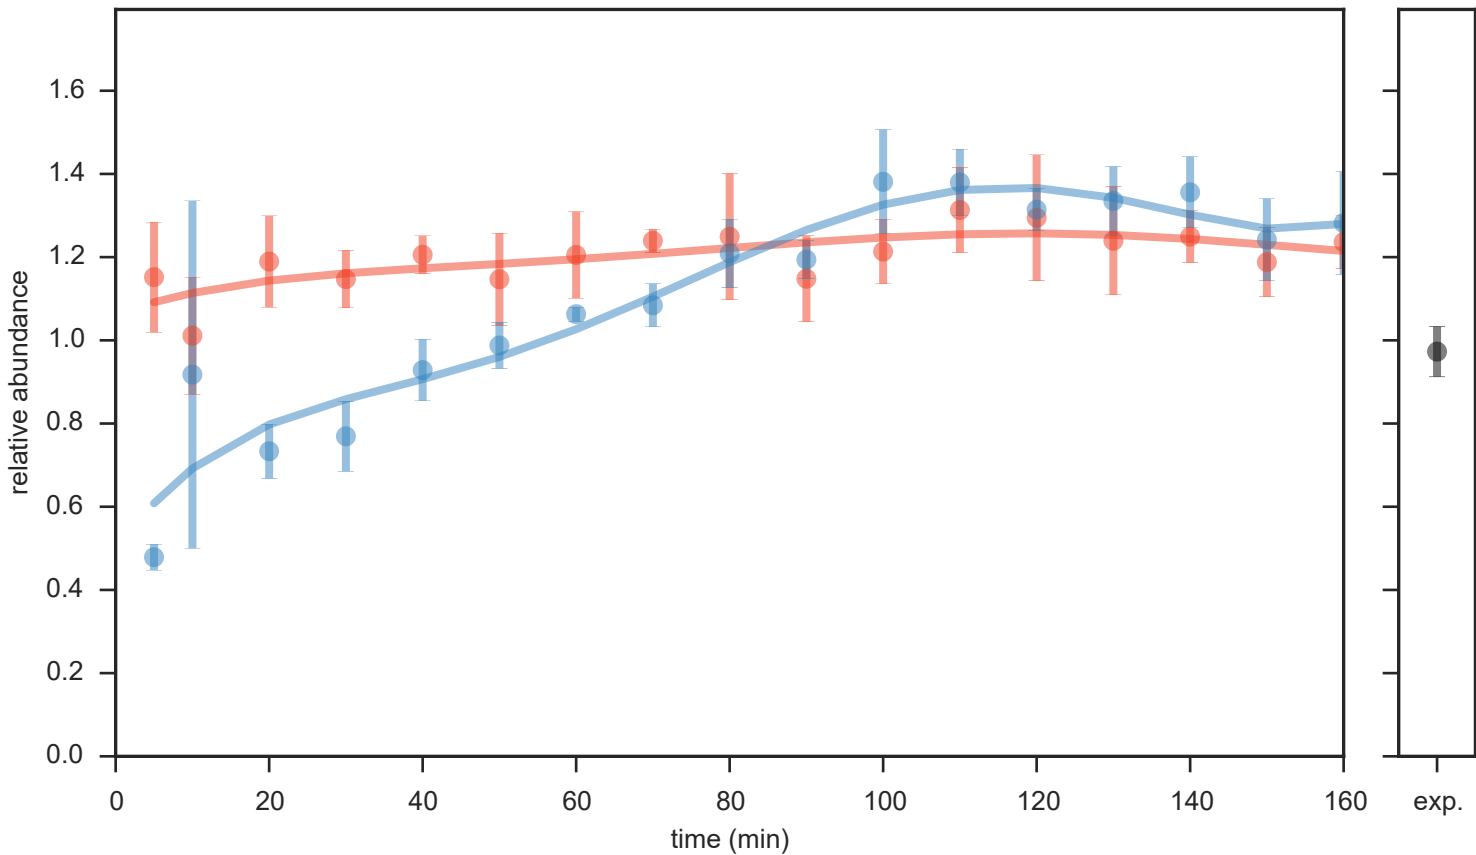

idms\_pid116\_mz90.054

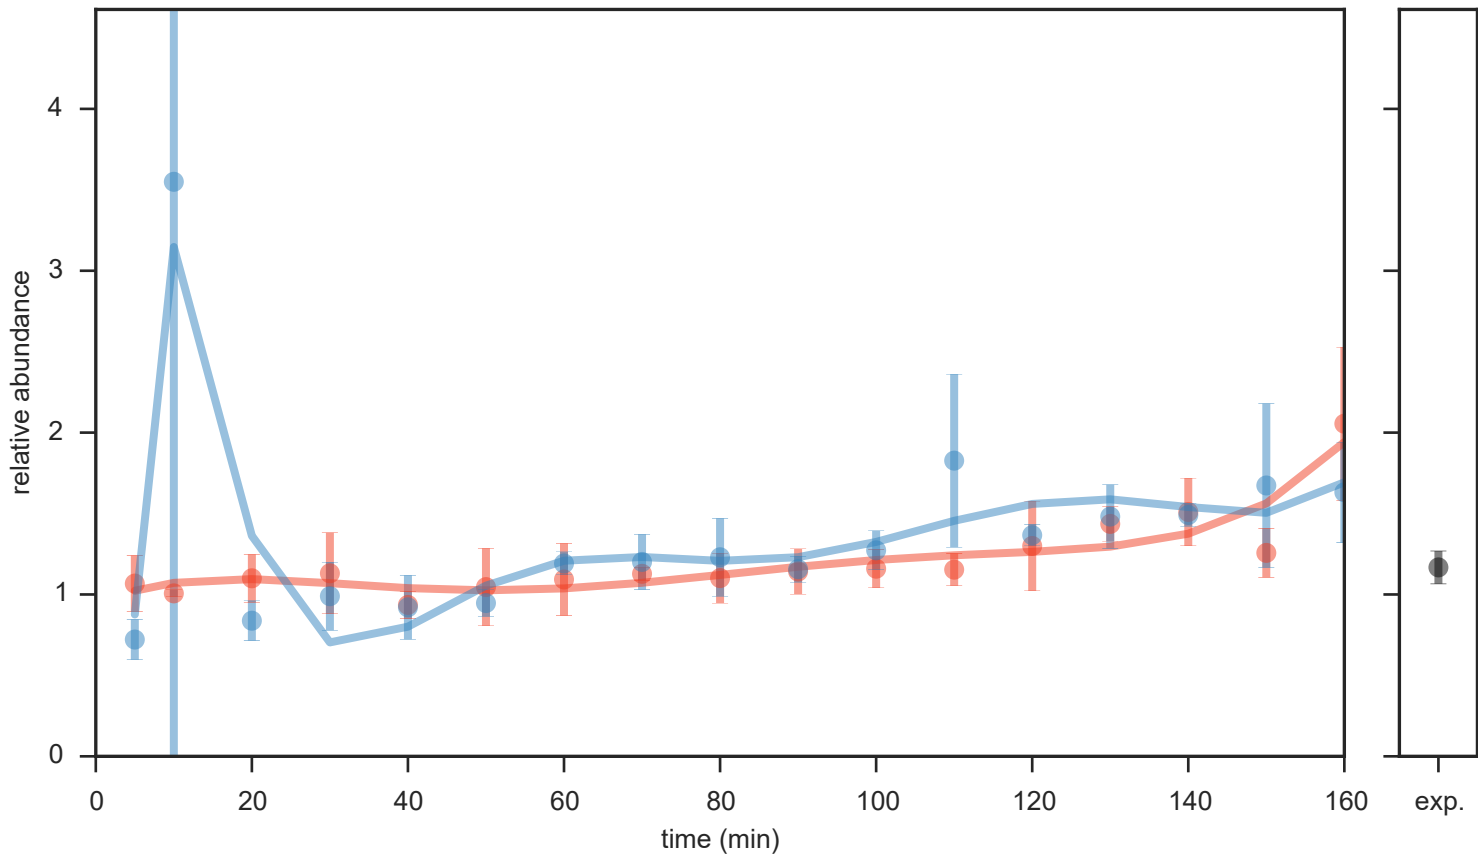



idms\_pid121\_mz196.18

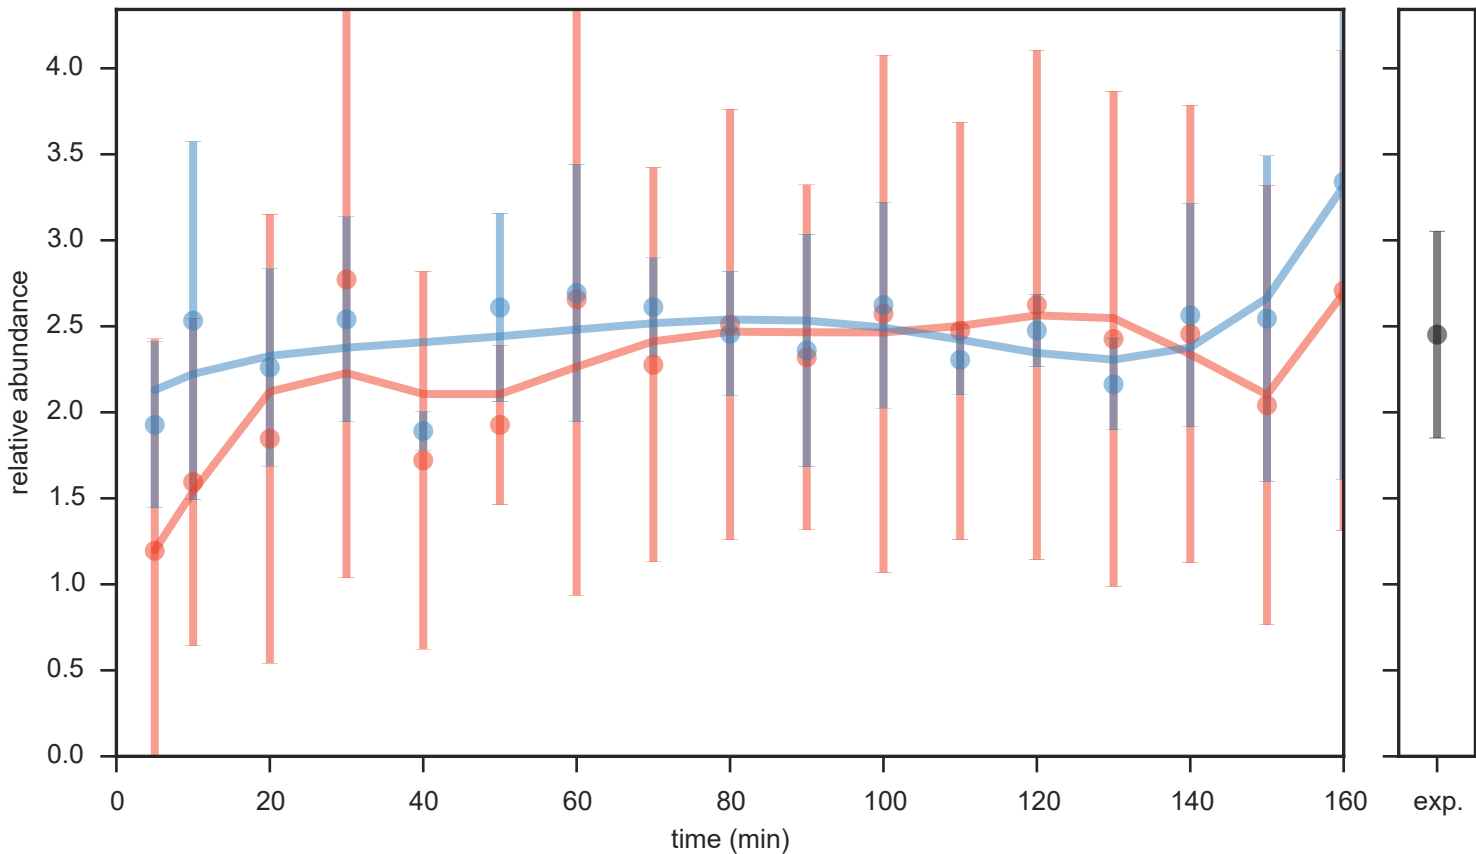

idms\_pid123\_mz383.11

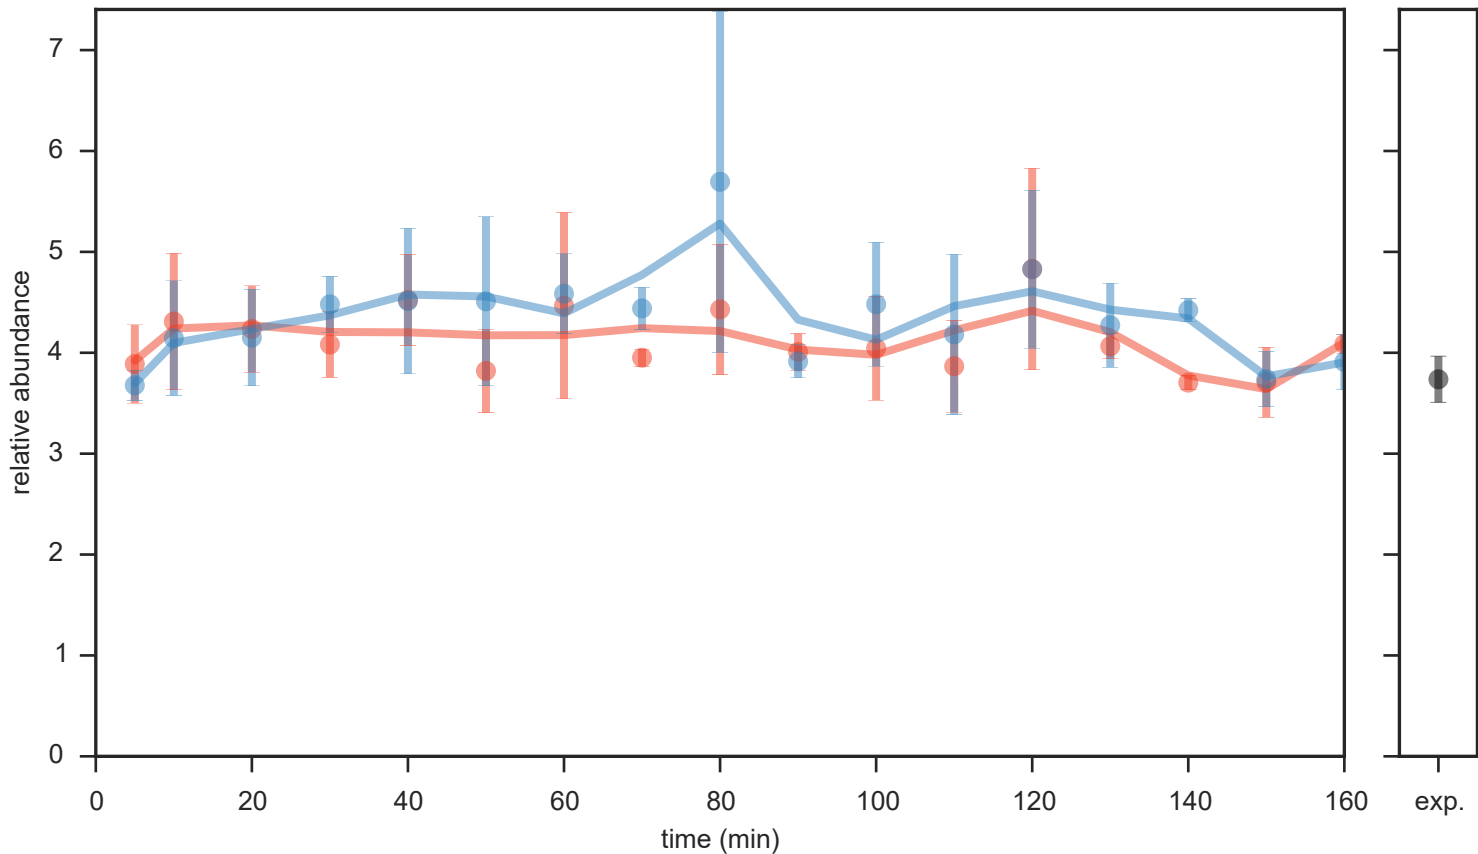

idms\_pid125\_mz189.09

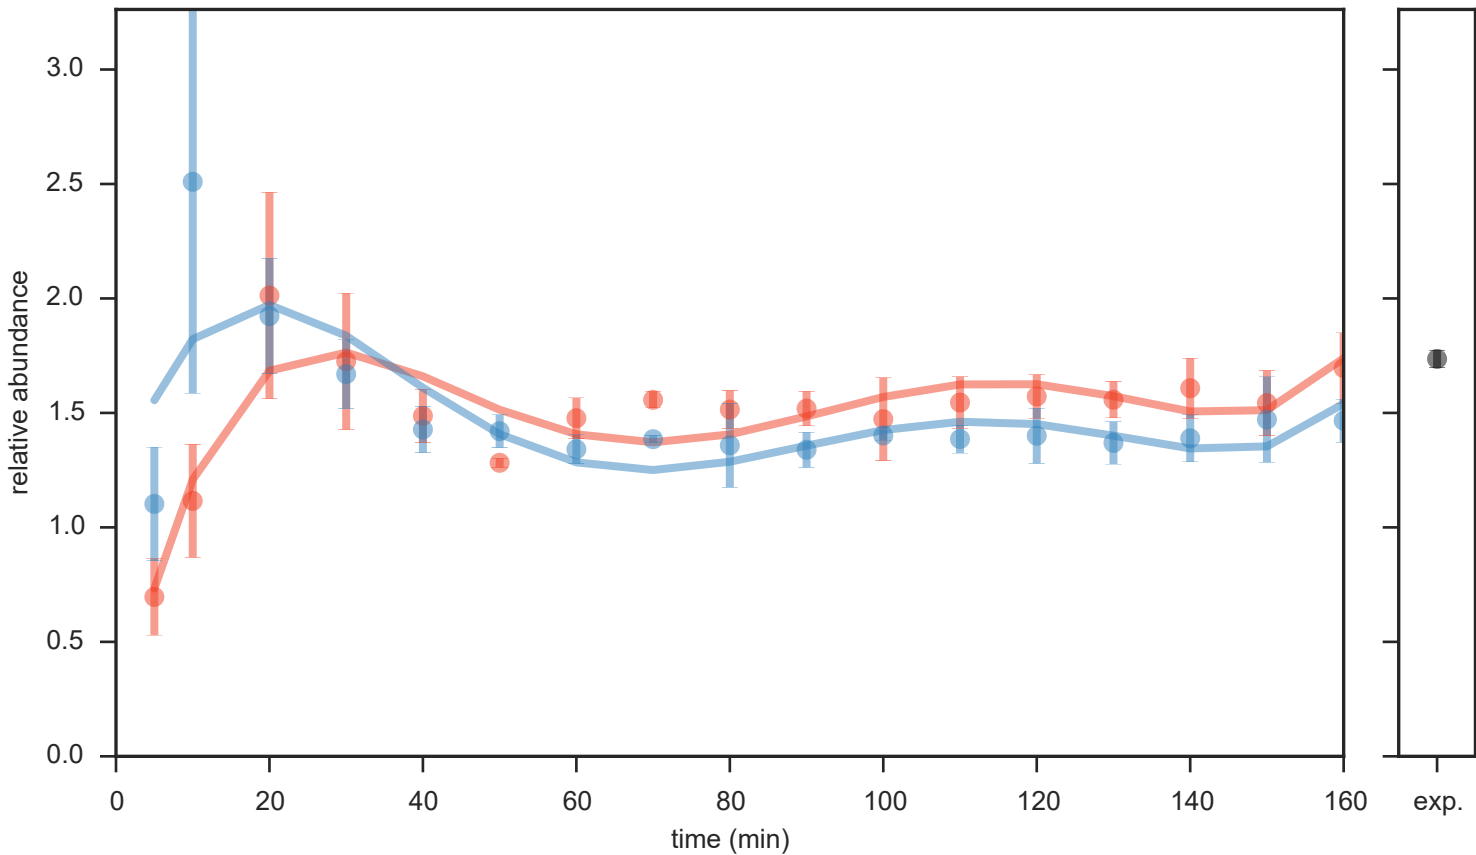

idms\_pid126\_mz210.19

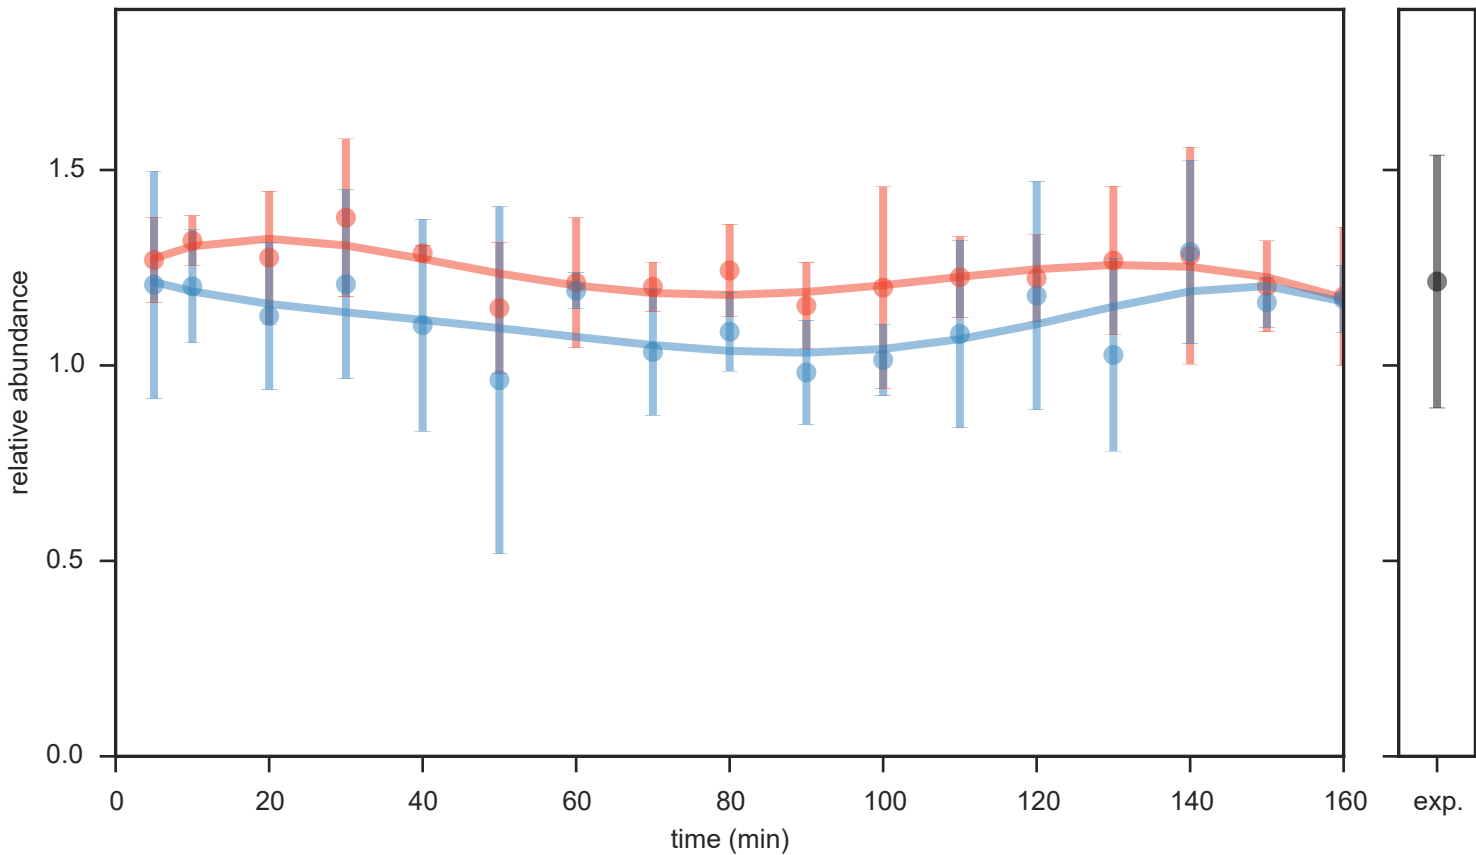

idms\_pid129\_mz285.22

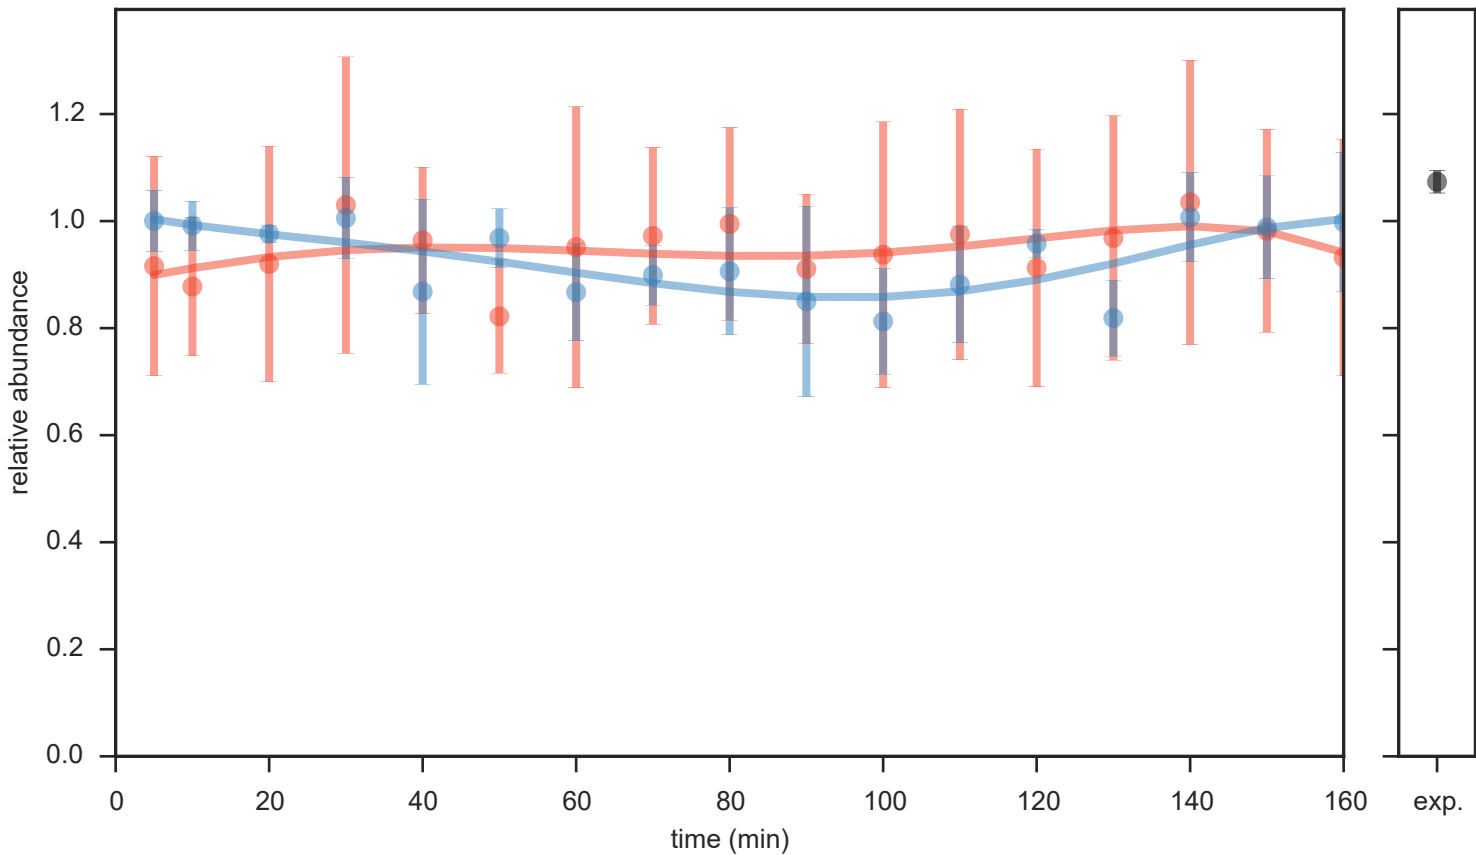

idms\_pid140\_mz254.08

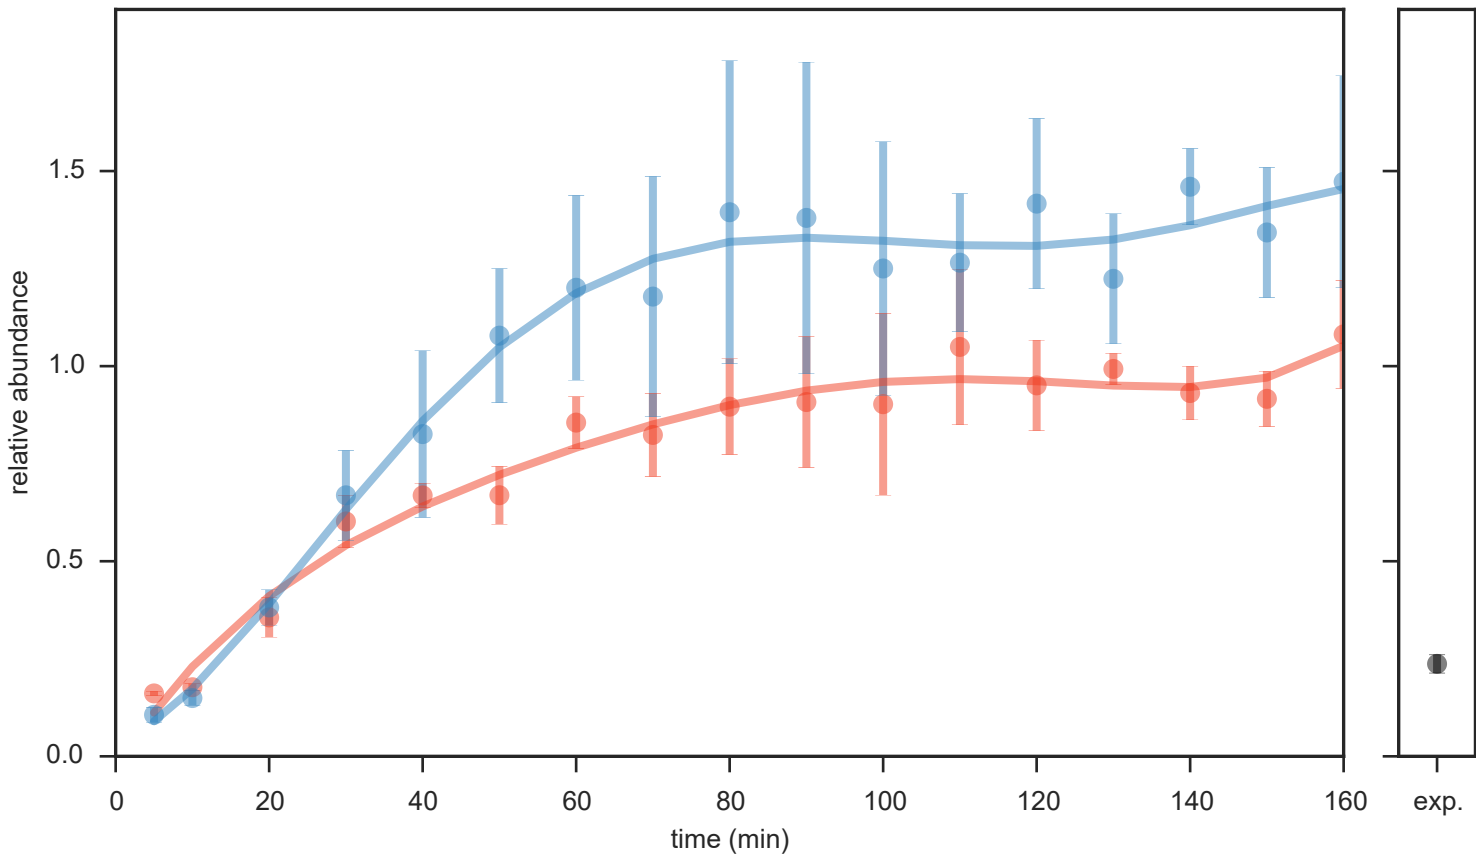

idms\_pid143\_mz342.01

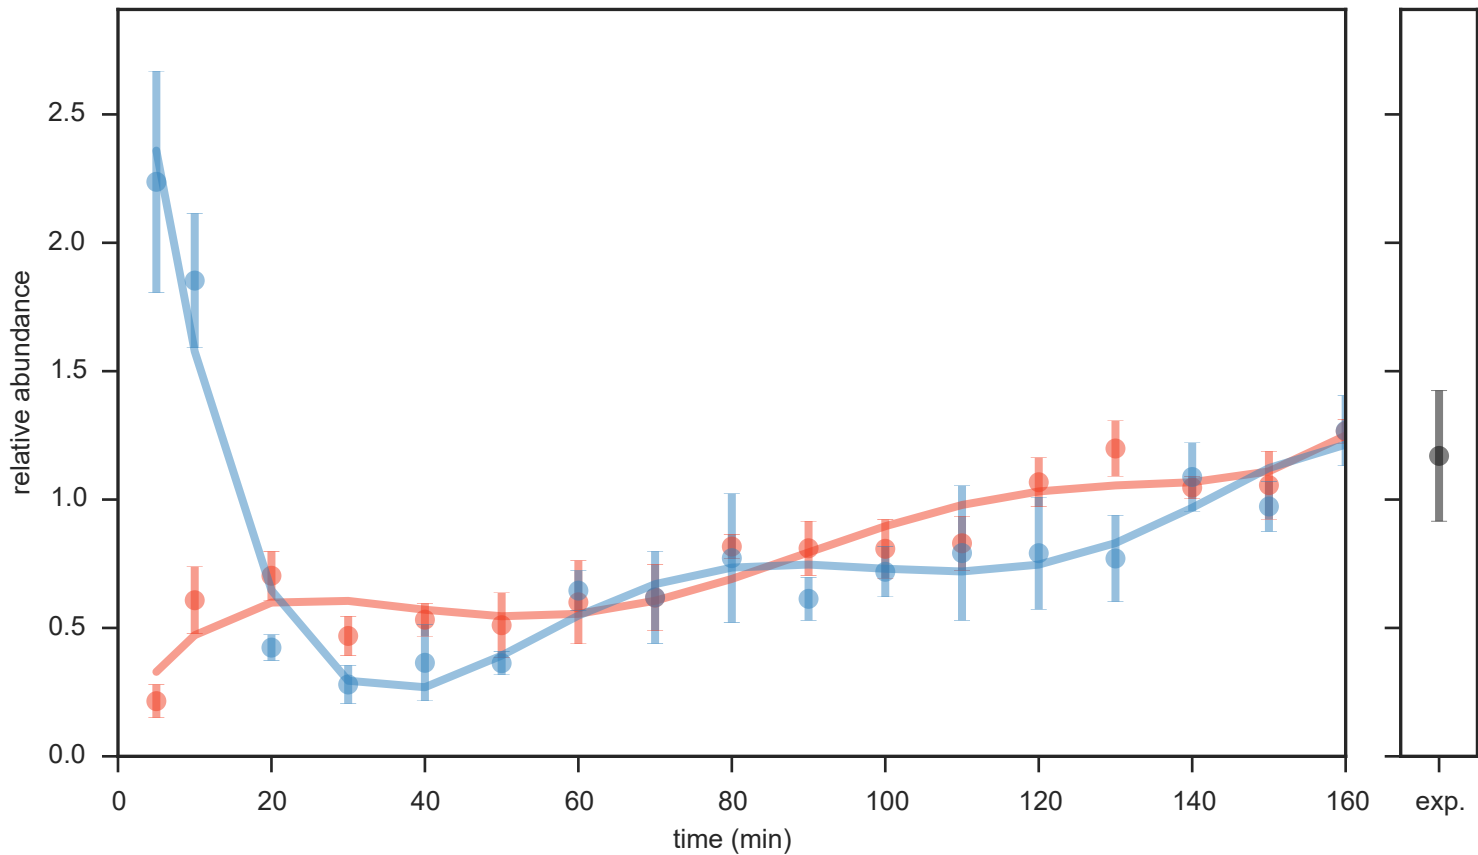

idms\_pid145\_mz385.12

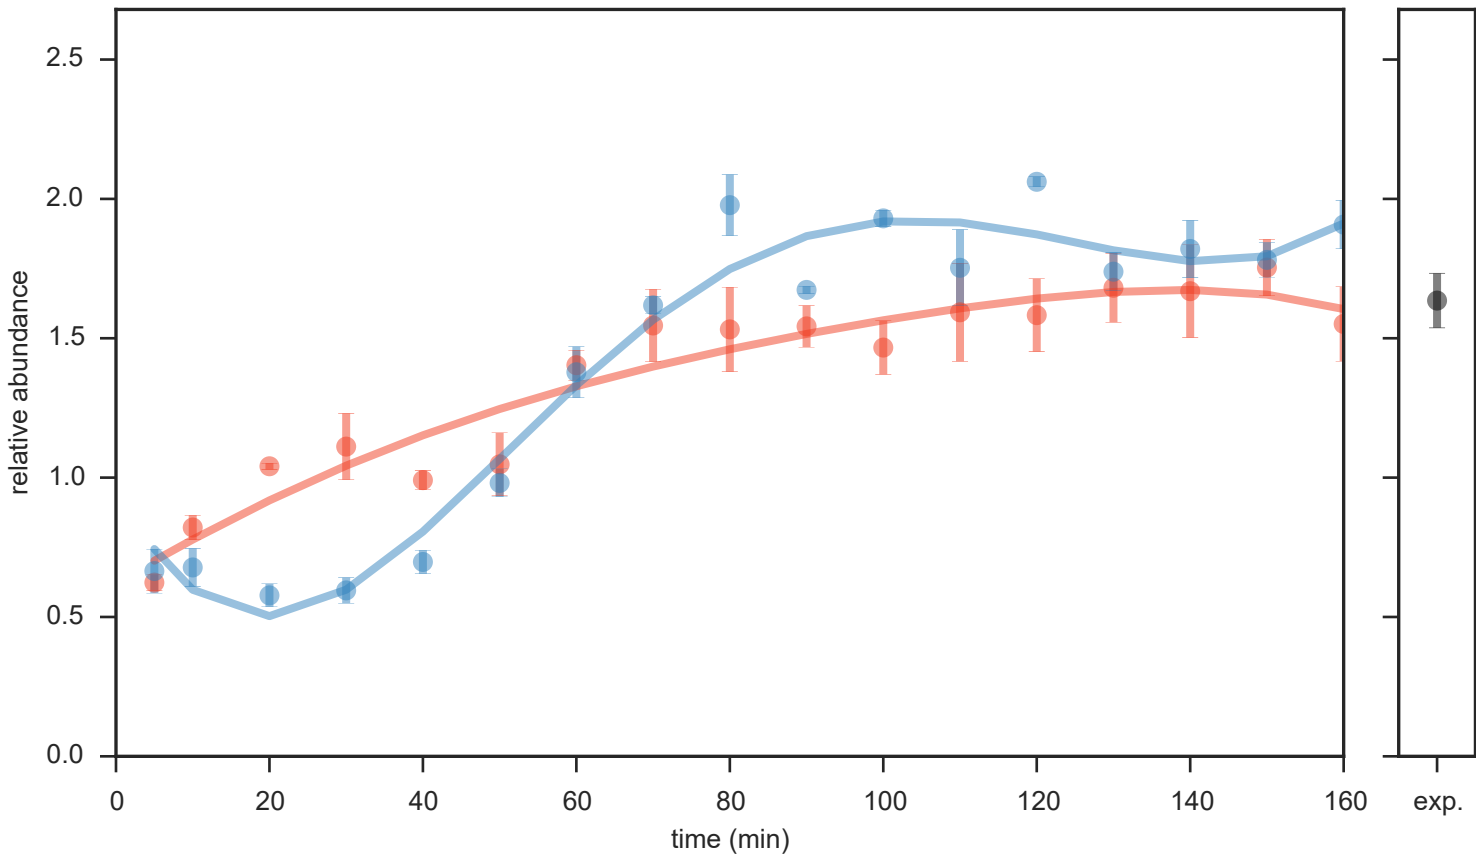



idms\_pid147\_mz205.09

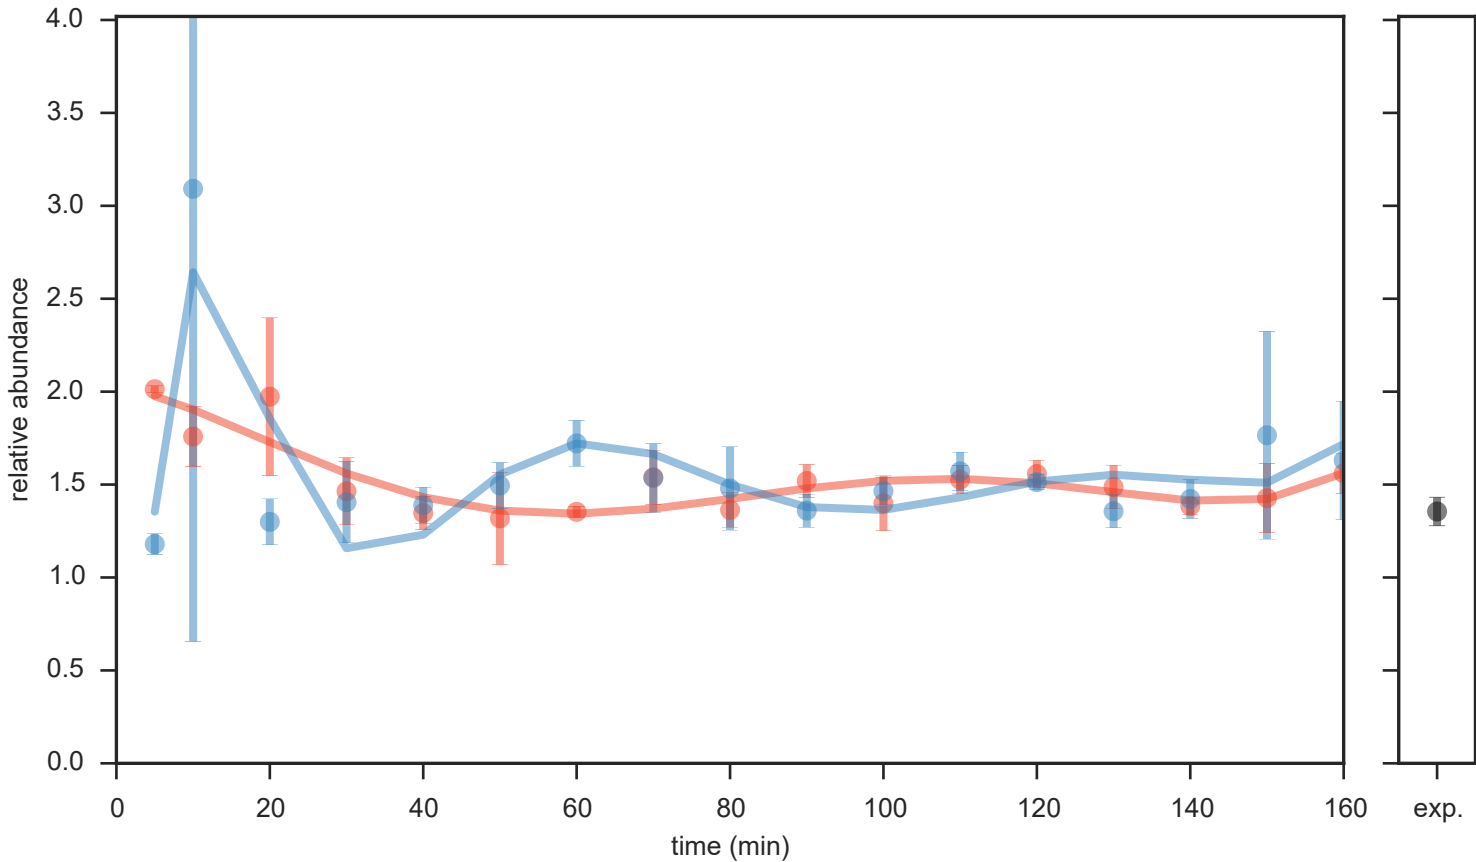

idms\_pid148\_mz192.06

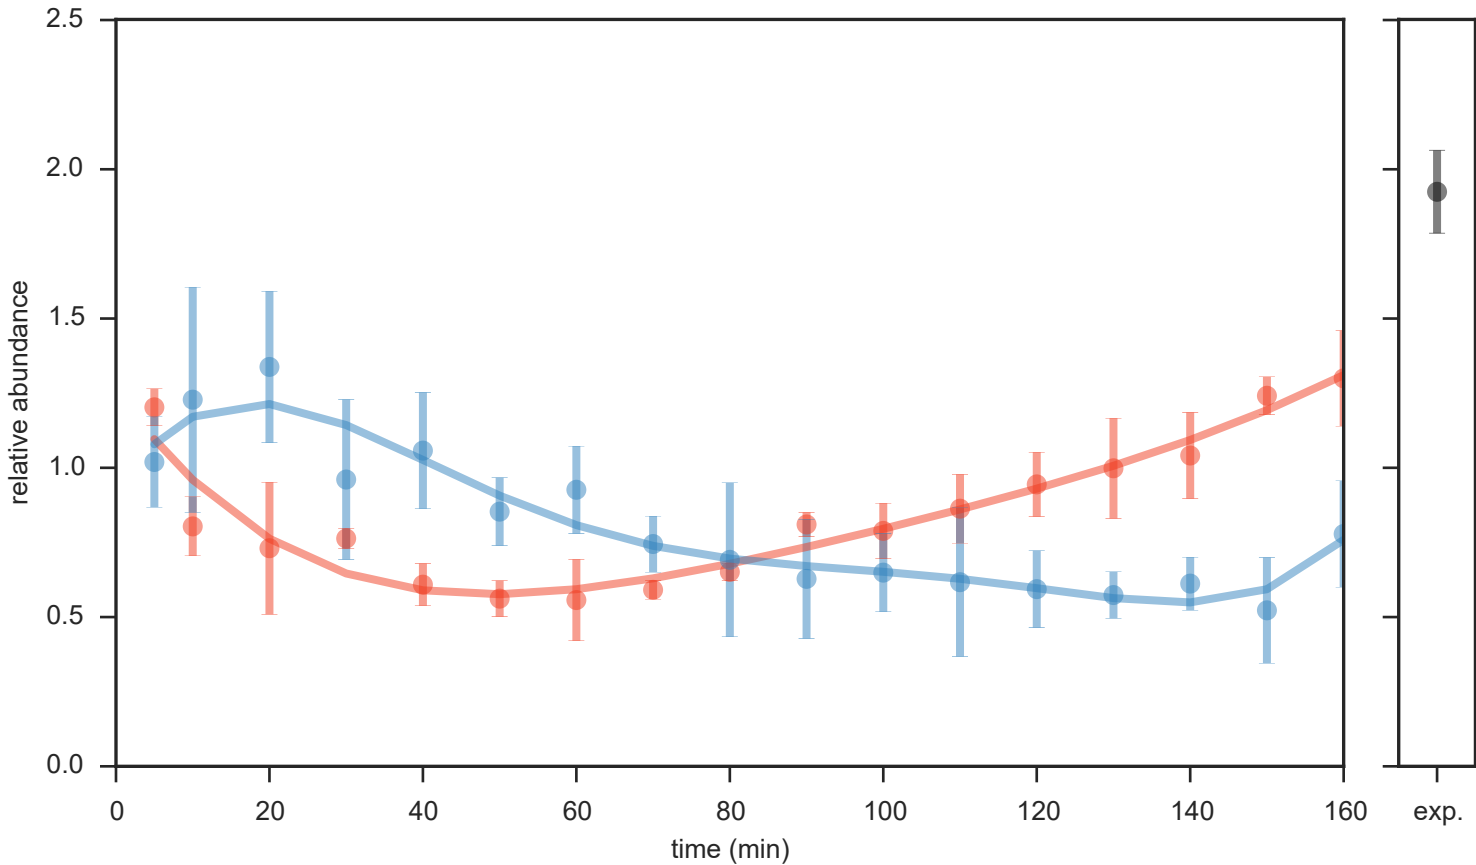

idms\_pid152\_mz282.17

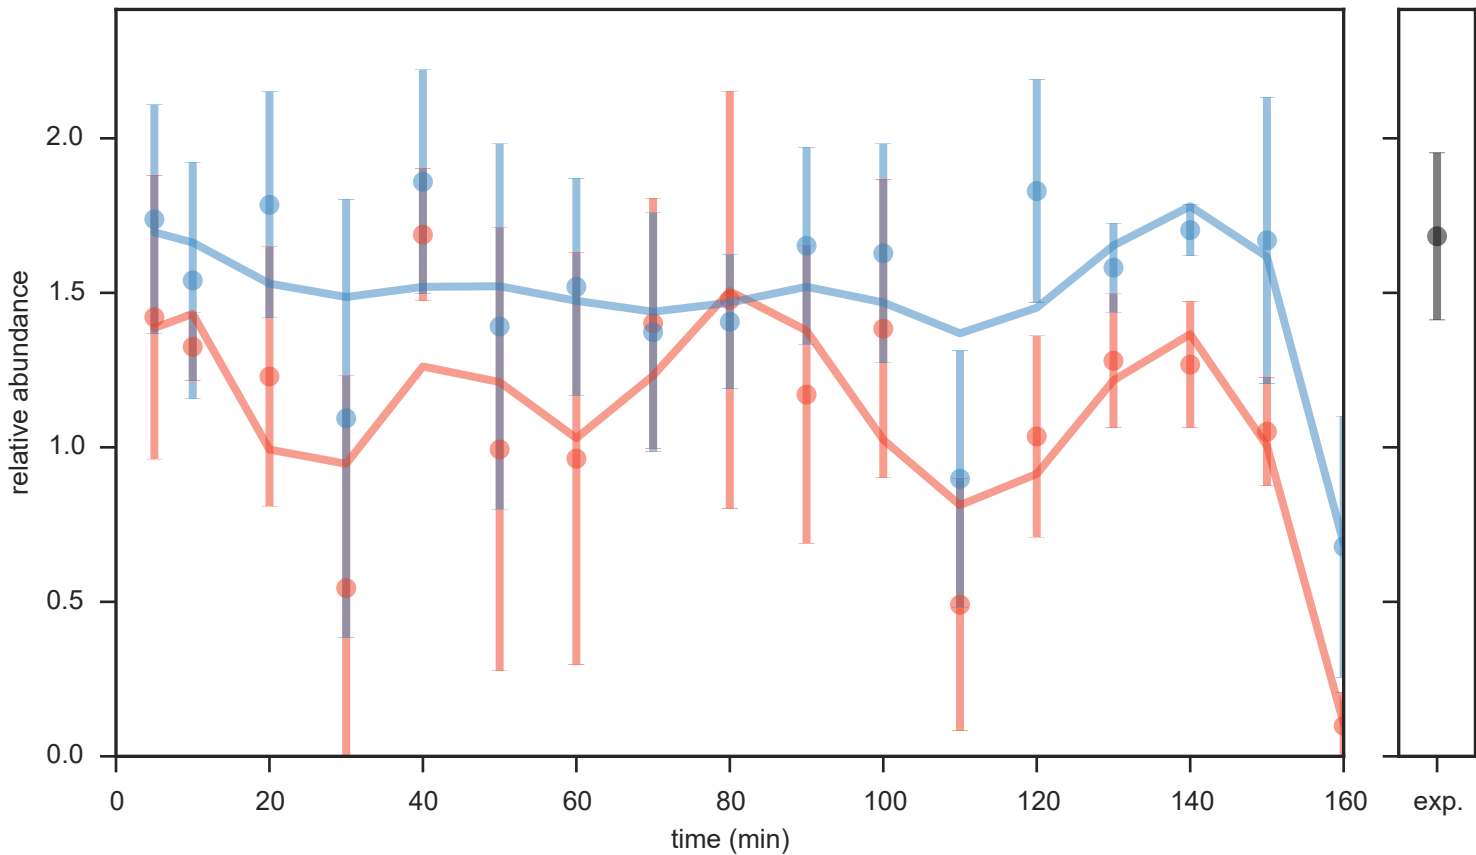

idms\_pid154\_mz106.04

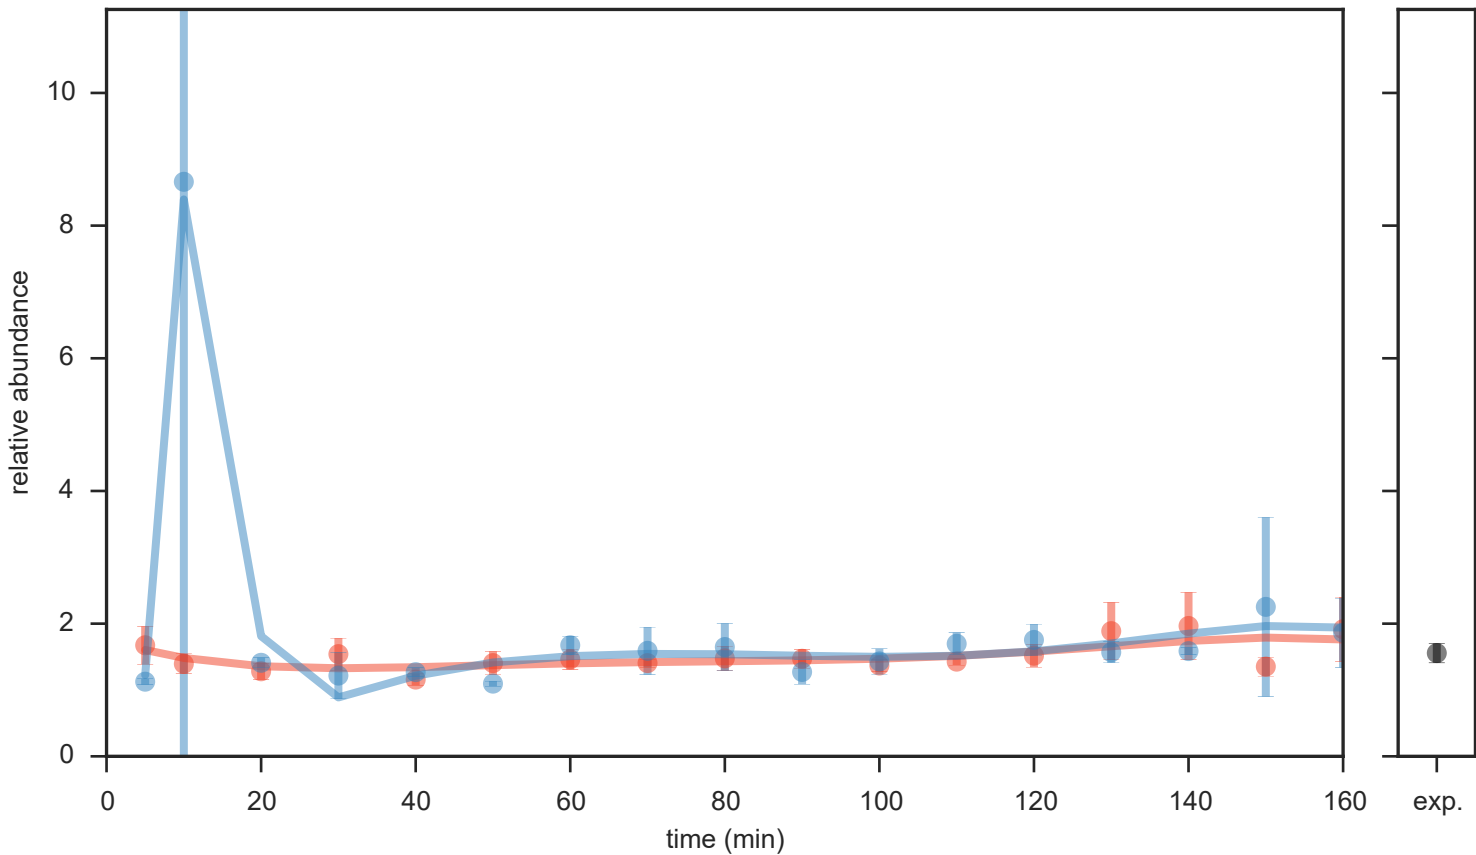

idms\_pid158\_mz188.17

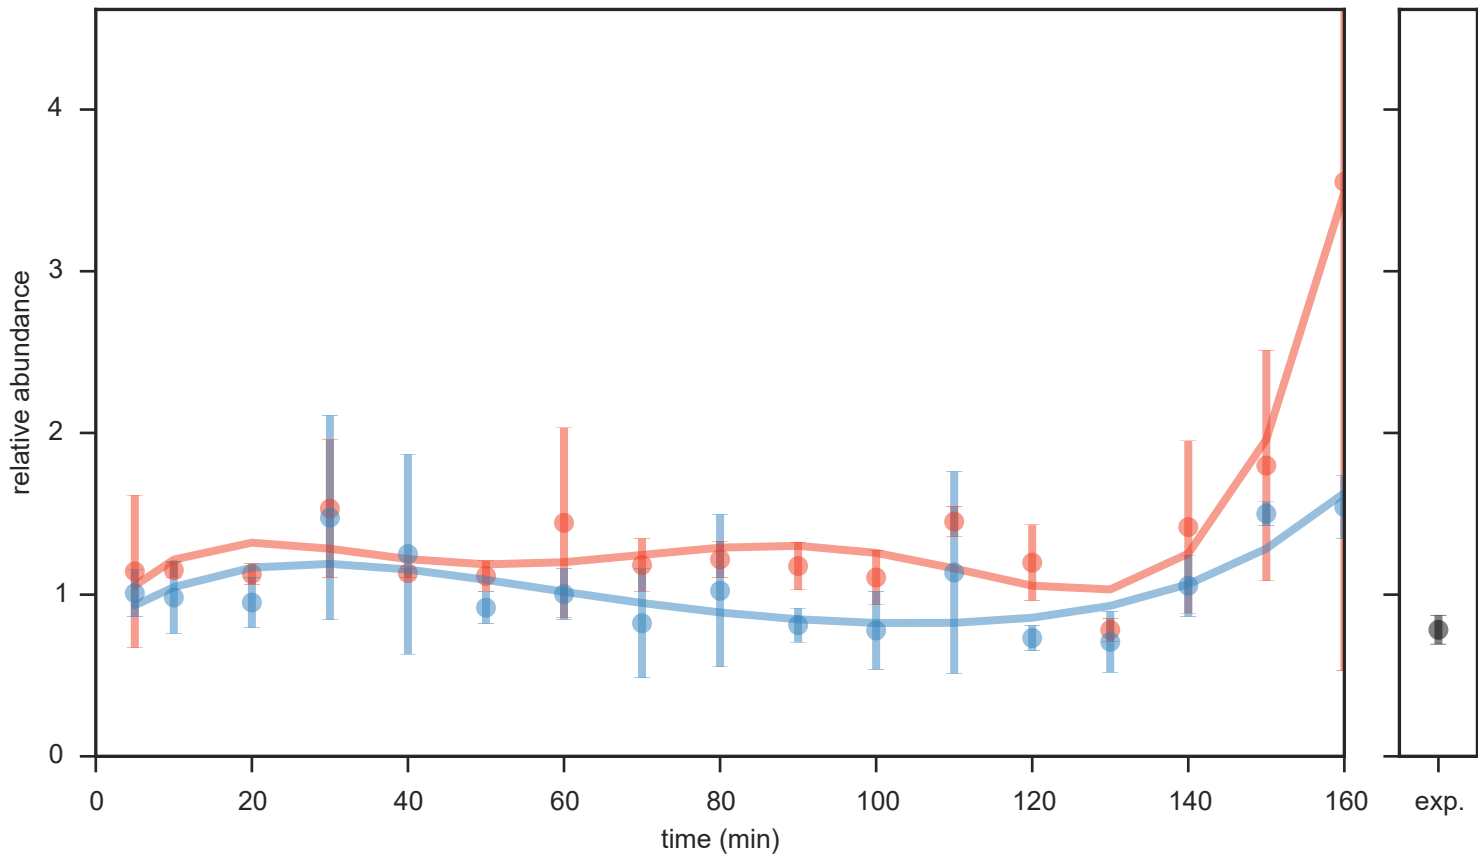

idms\_pid159\_mz200.17

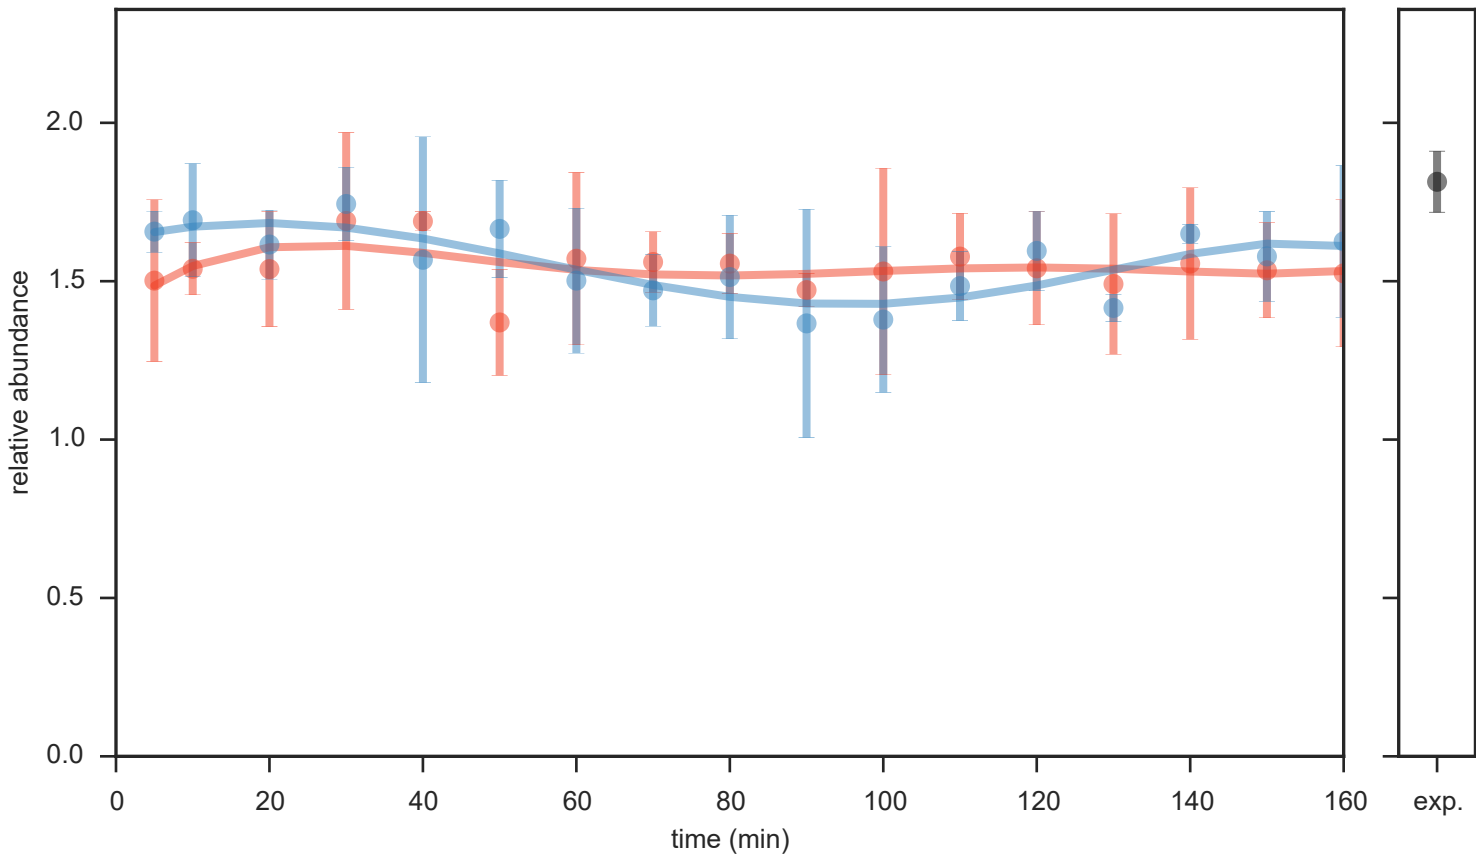

idms\_pid160\_mz182.98

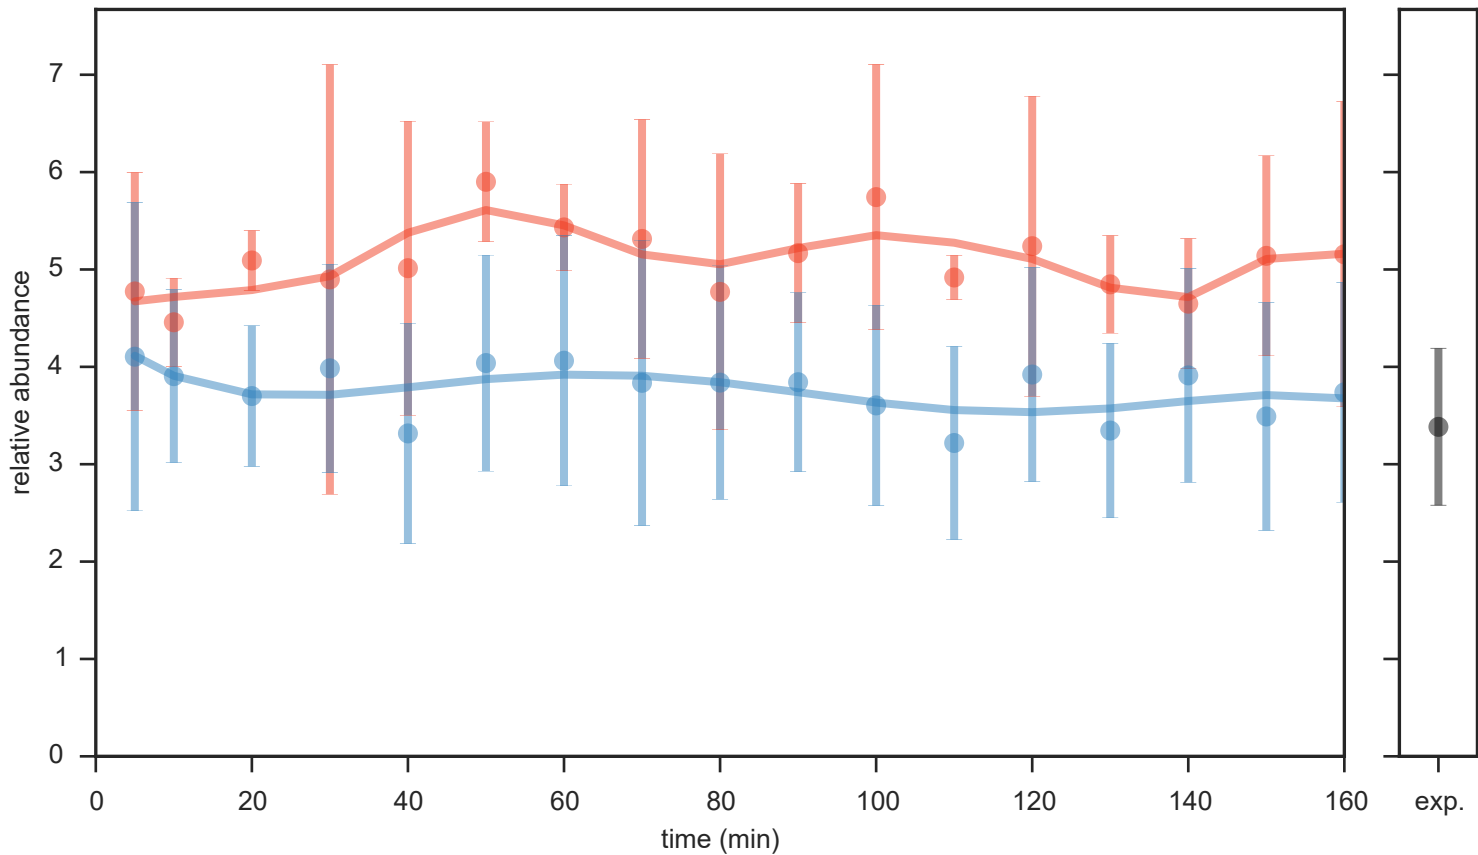

idms\_pid161\_mz144.07

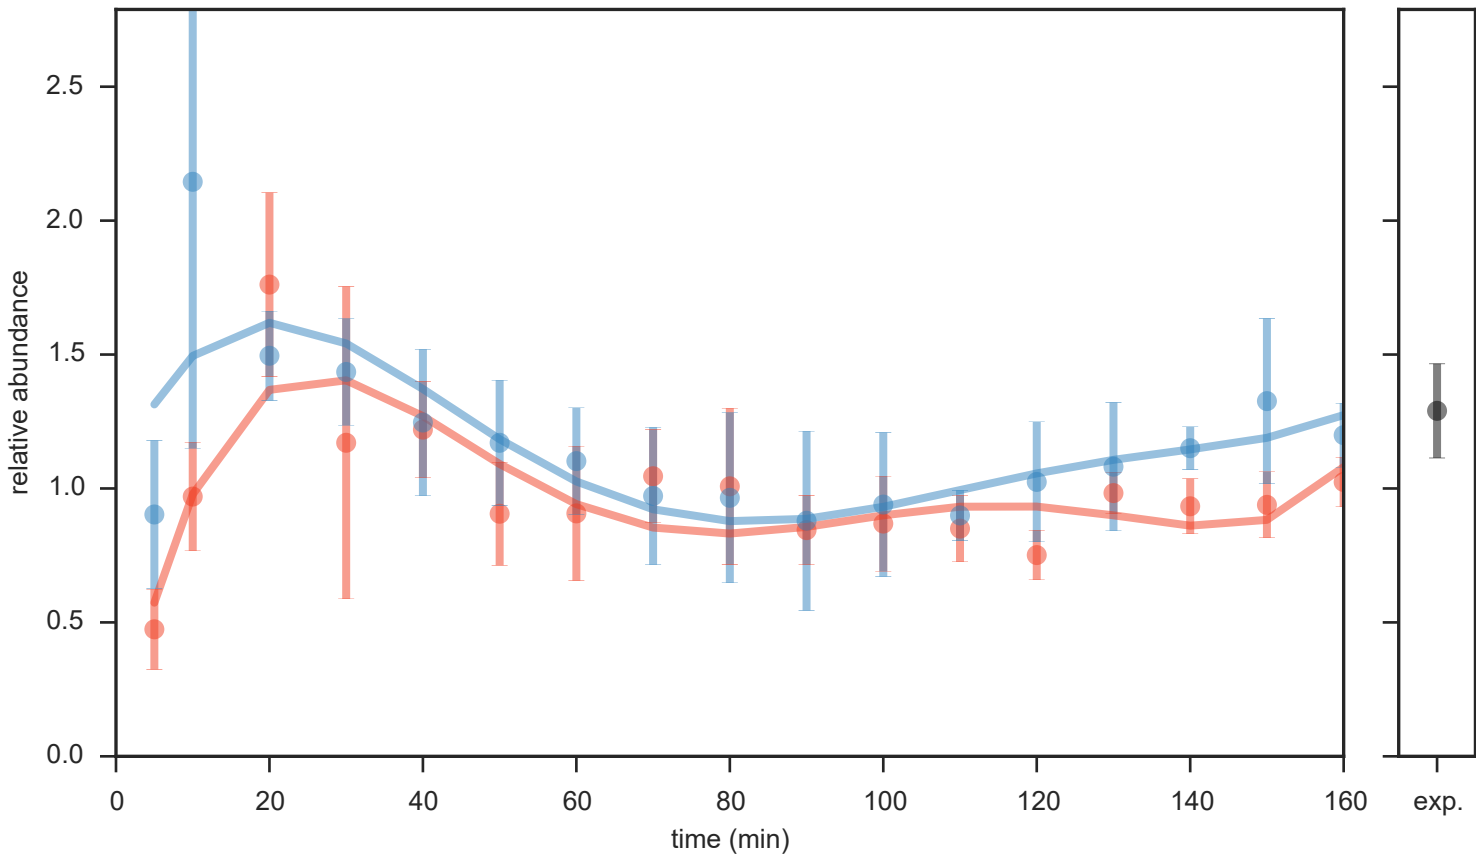



idms\_pid162\_mz198.09

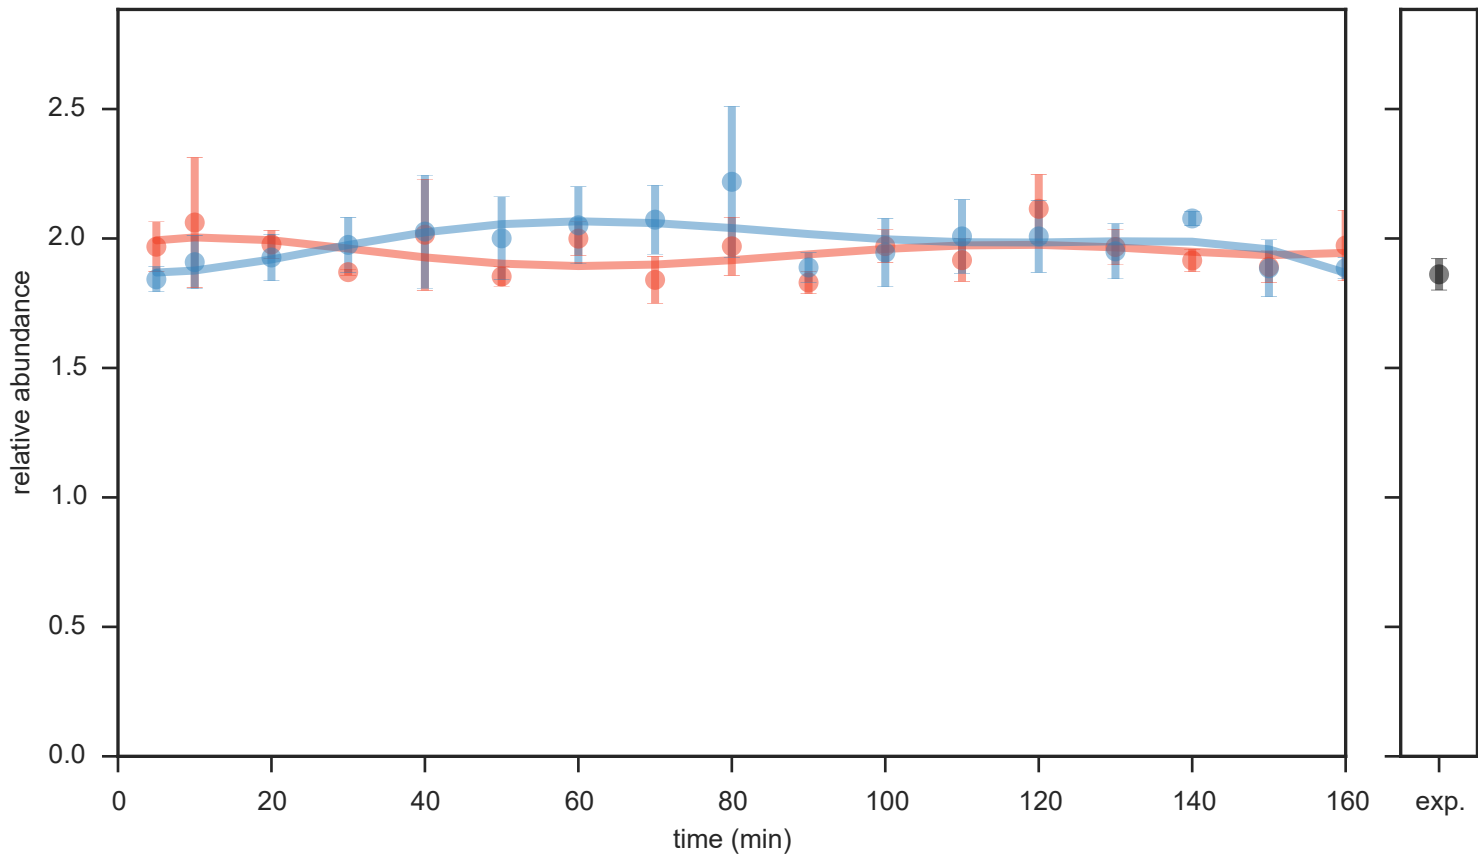

idms\_pid164\_mz195.99

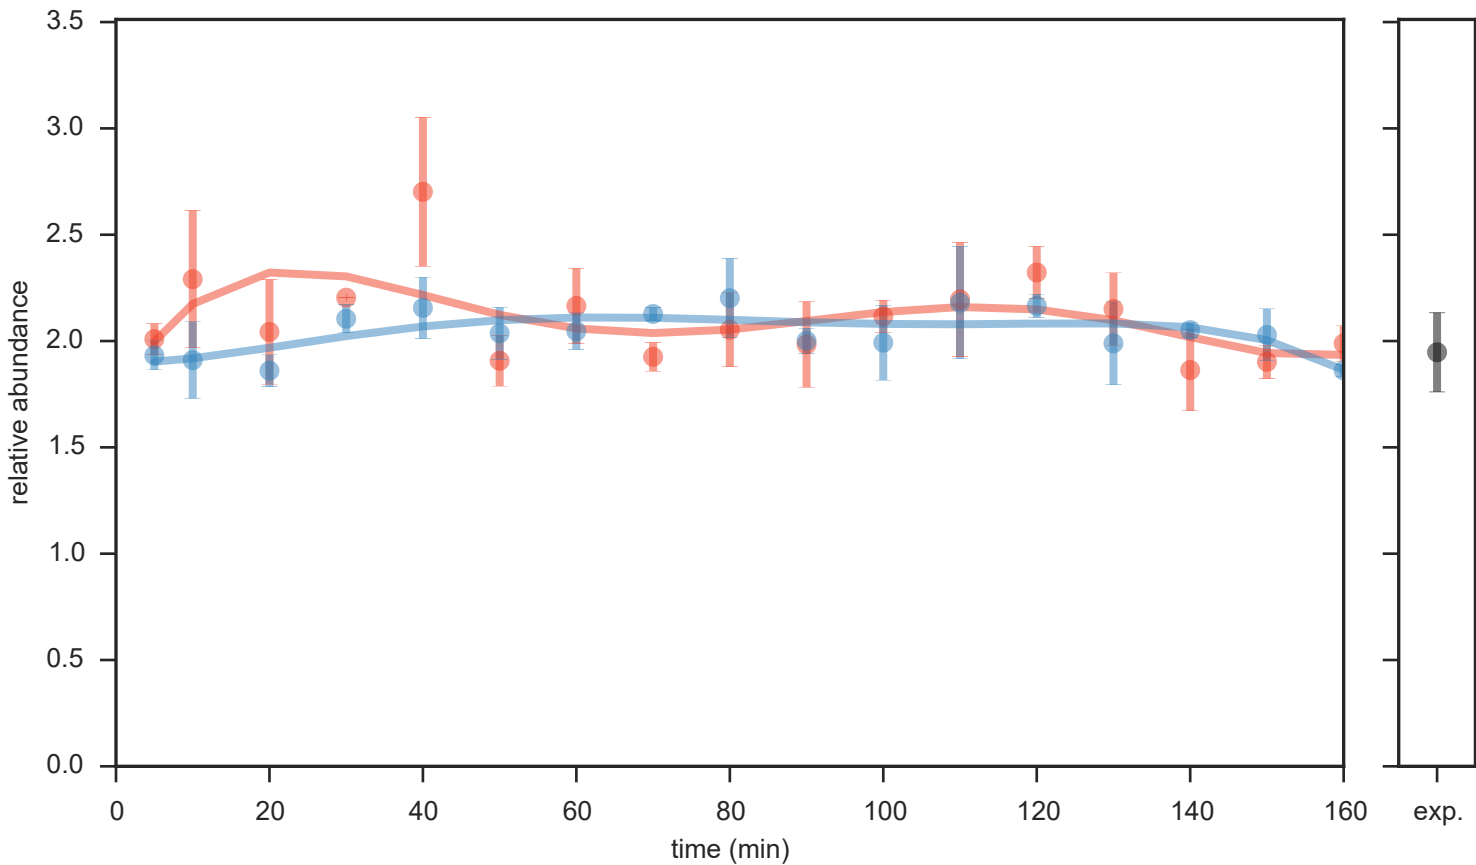

idms\_pid172\_mz444.17

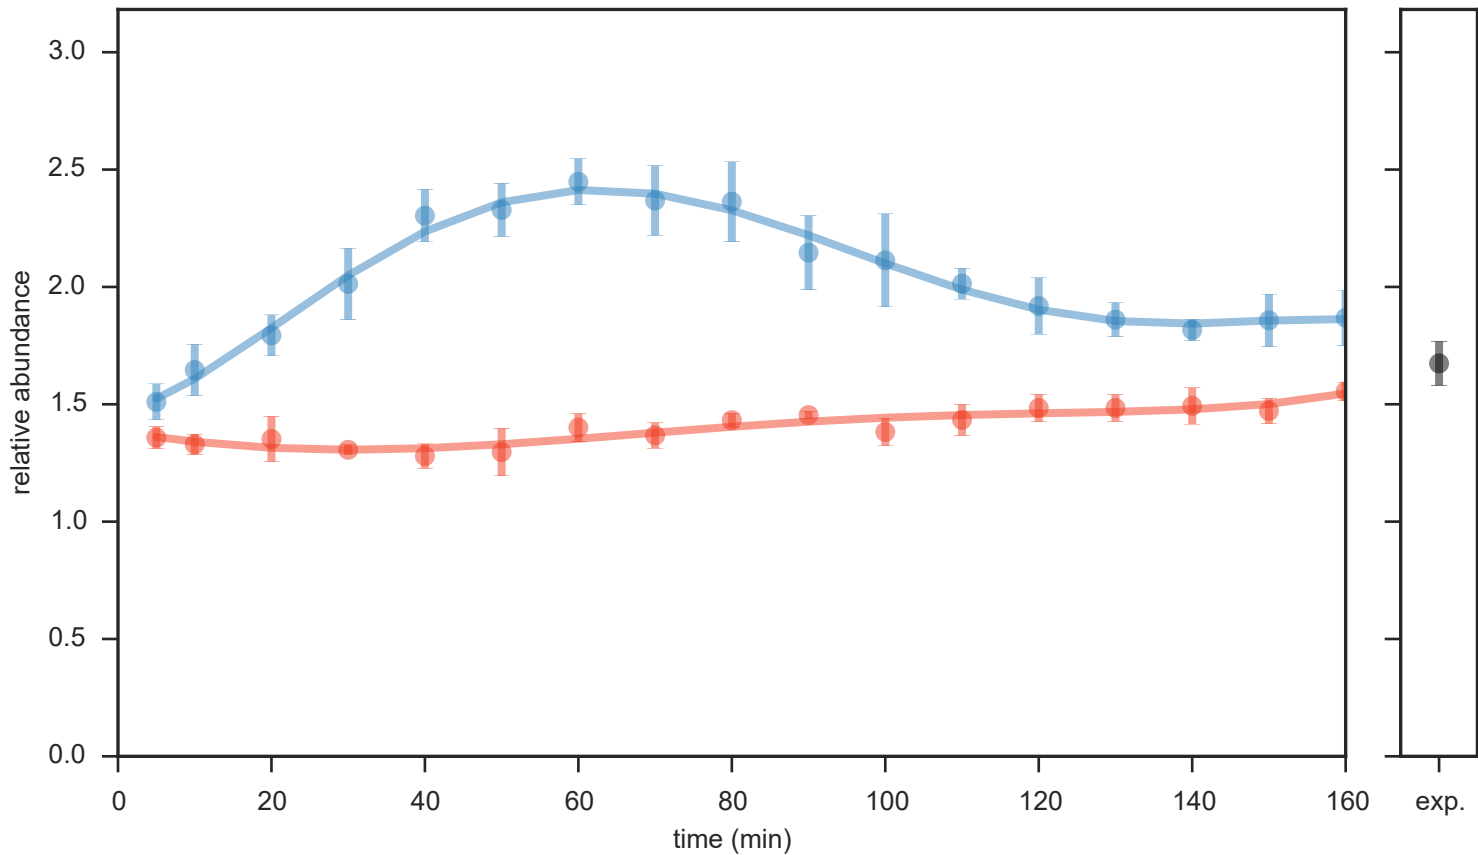

idms\_pid174\_mz228.20

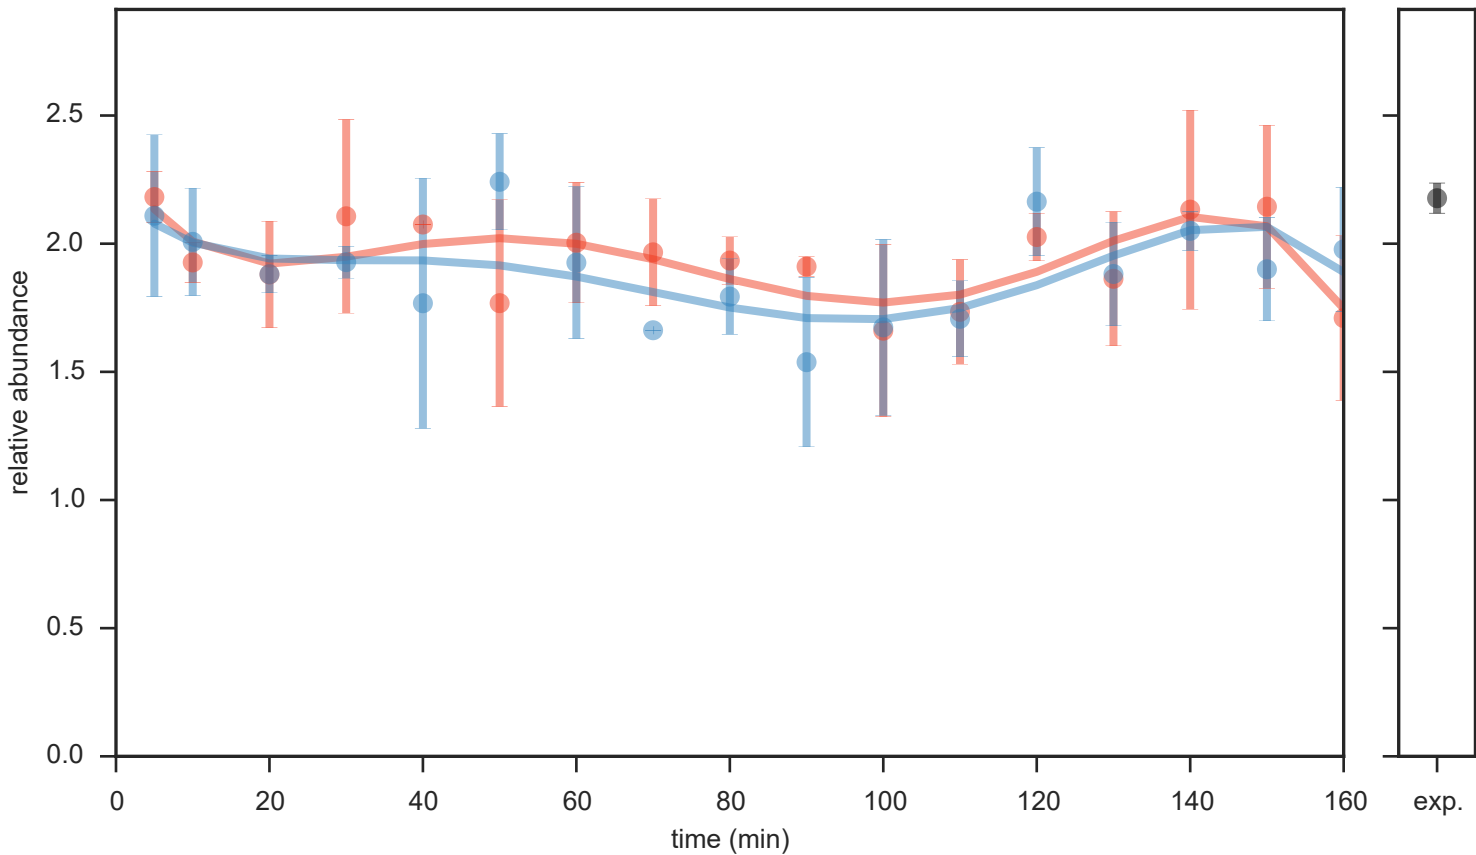

idms\_pid176\_mz256.10

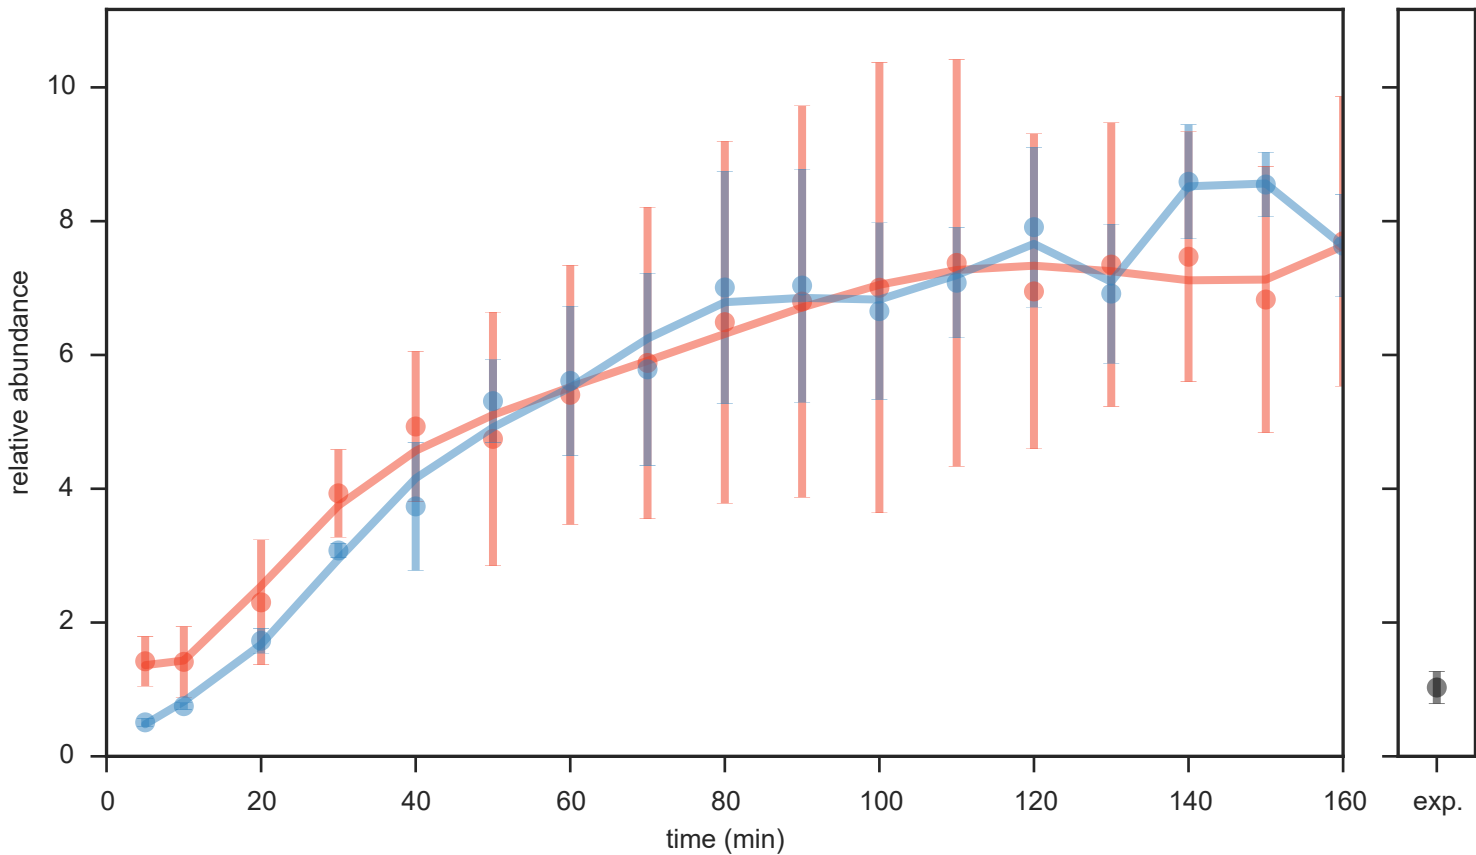

idms\_pid179\_mz339.22

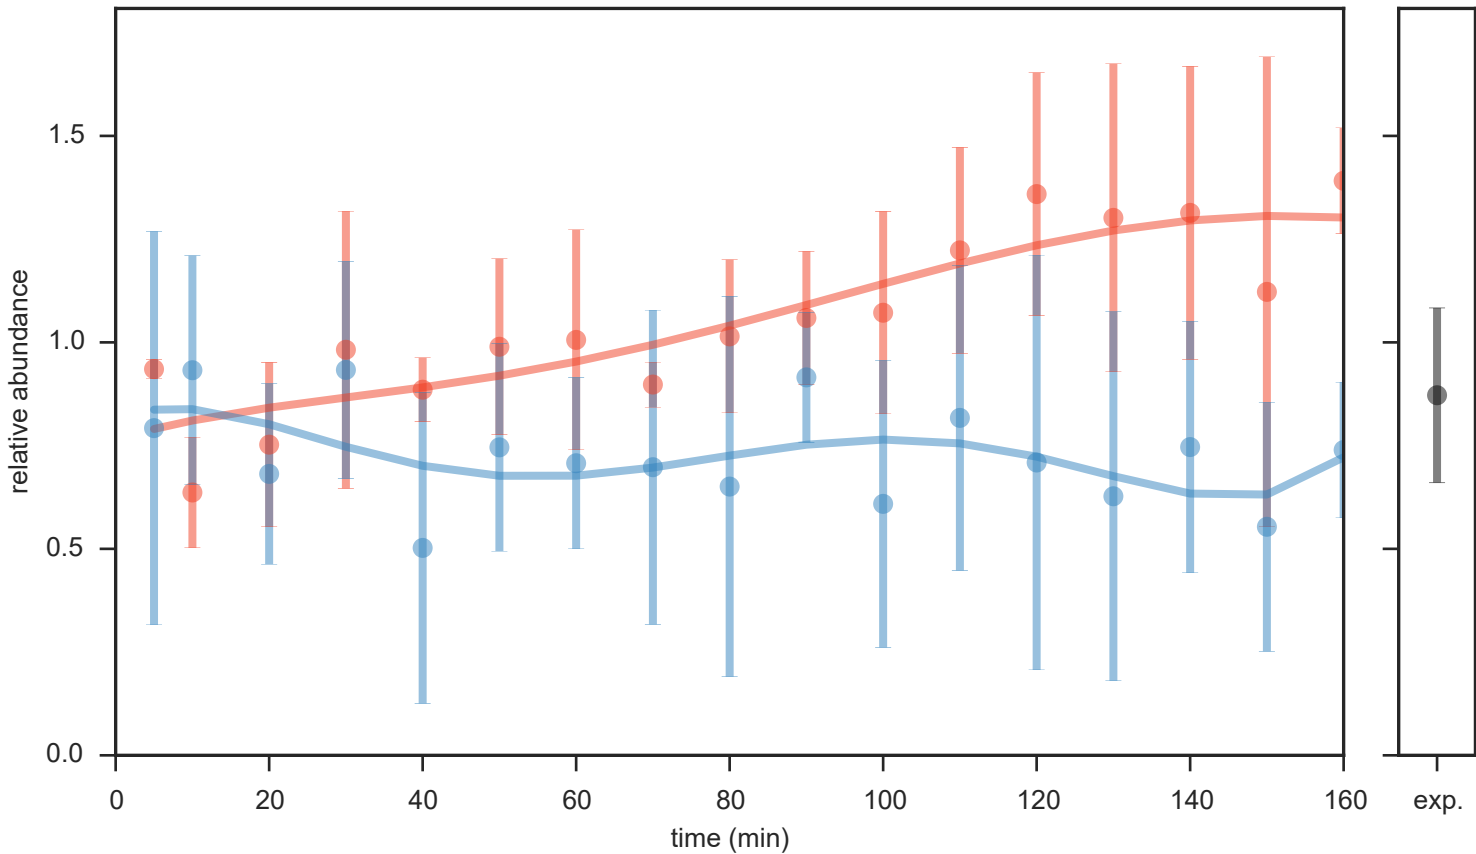

idms\_pid180\_mz266.22

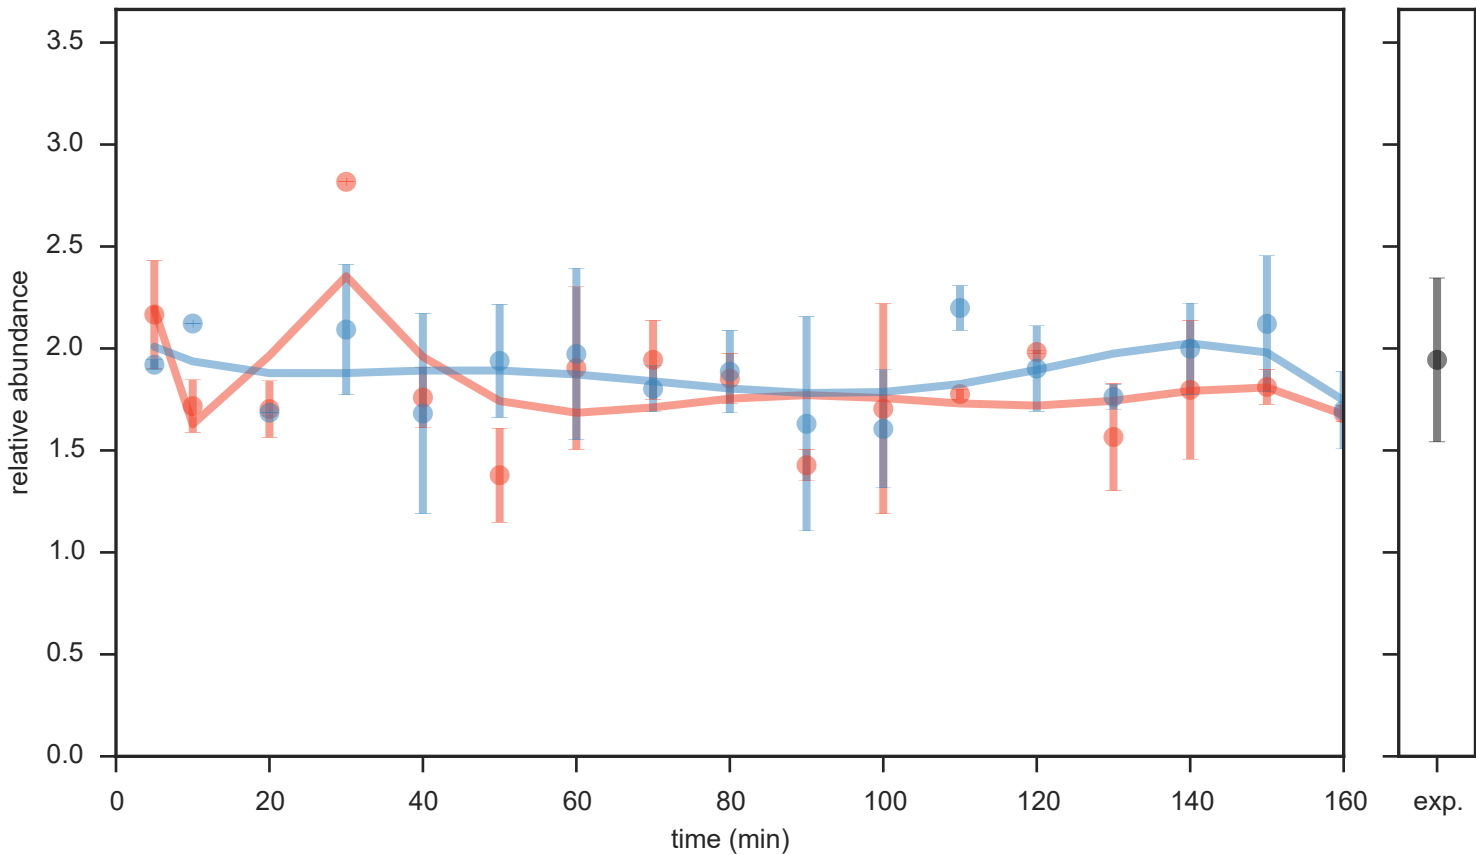

idms\_pid186\_mz166.08

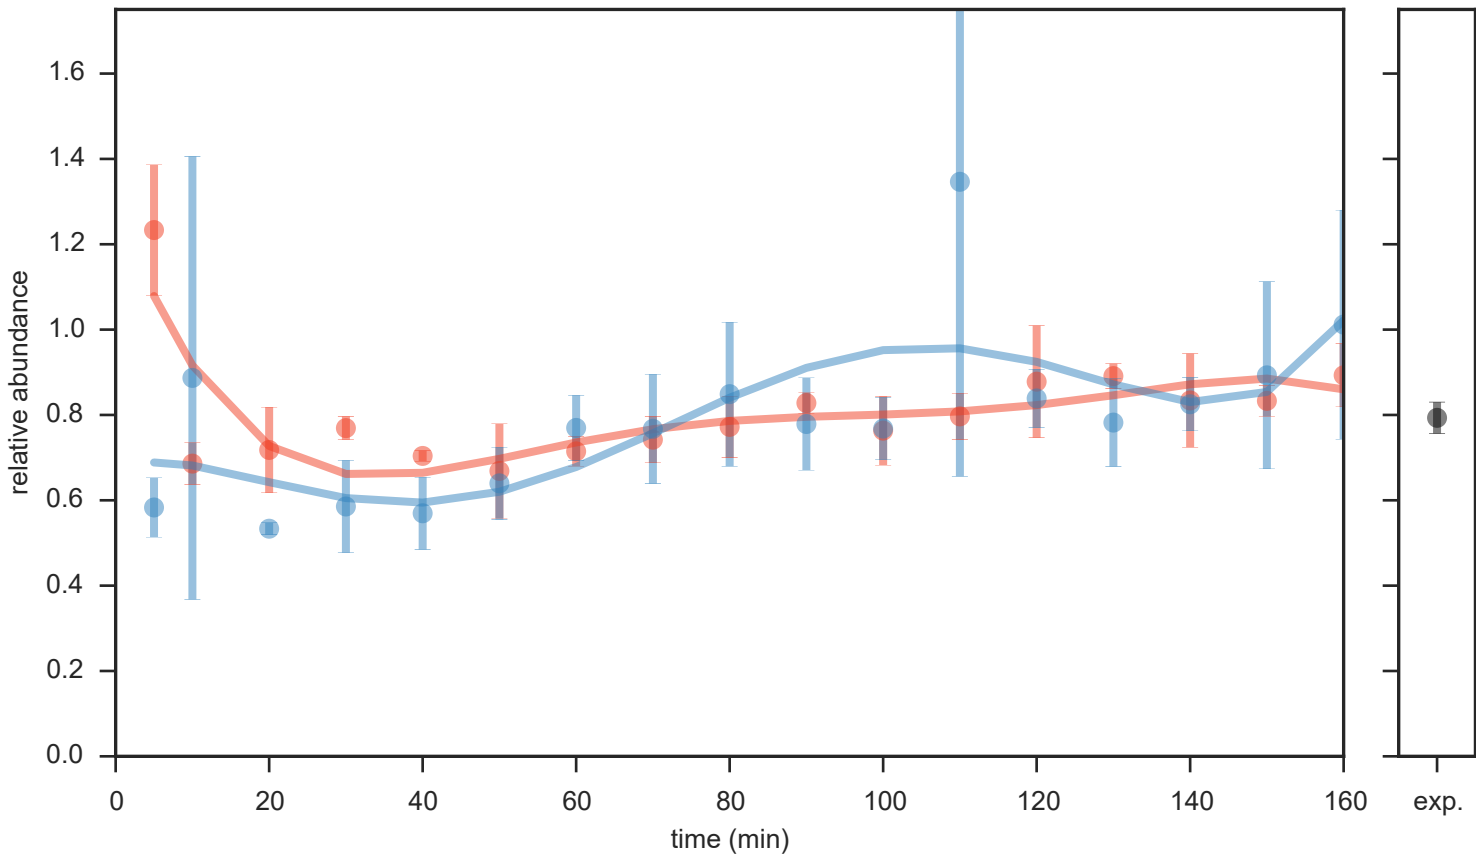



idms\_pid189\_mz248.03

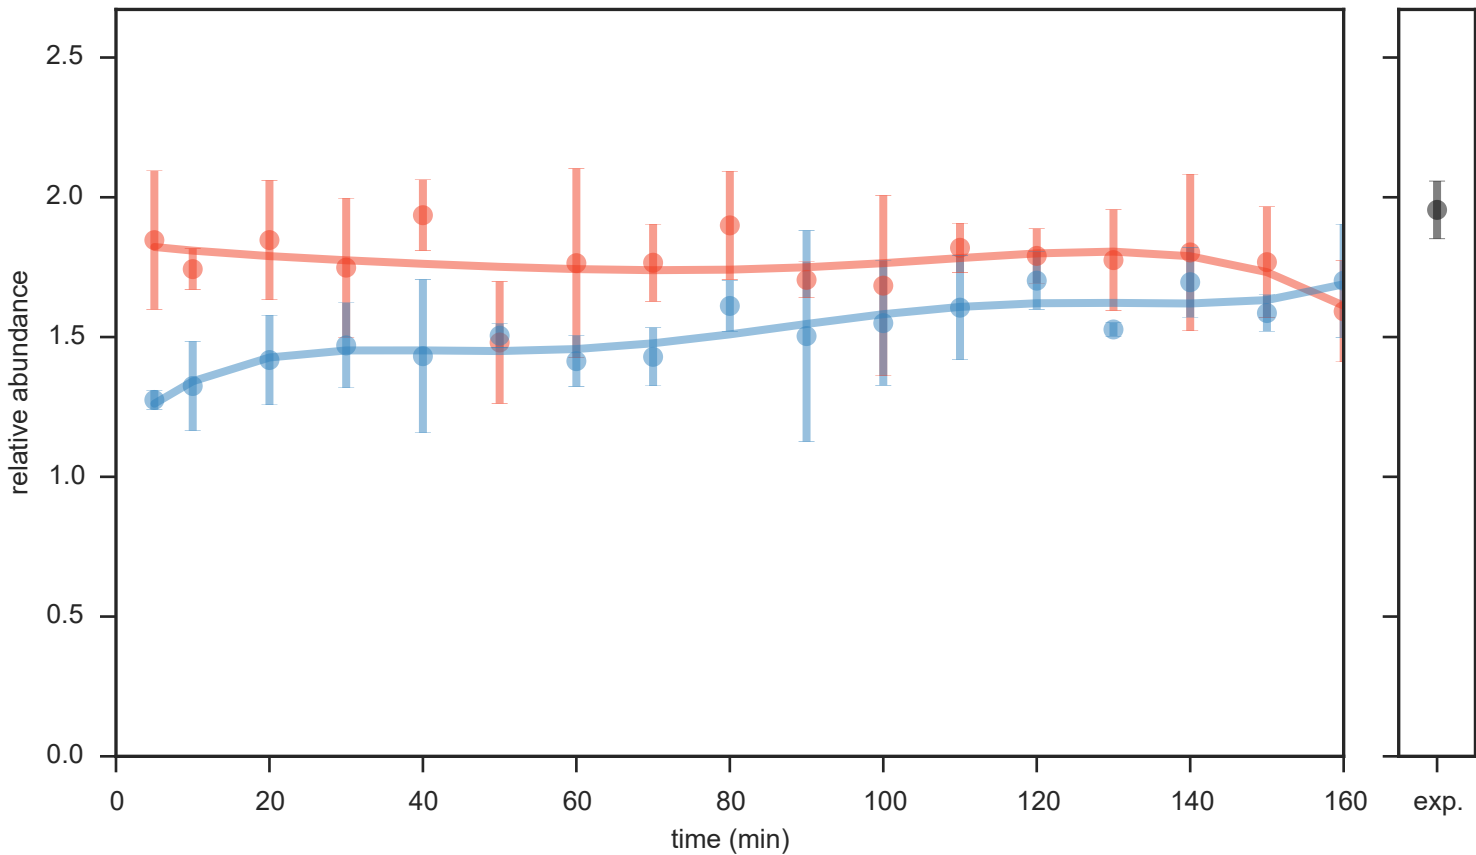

idms\_pid190\_mz198.16

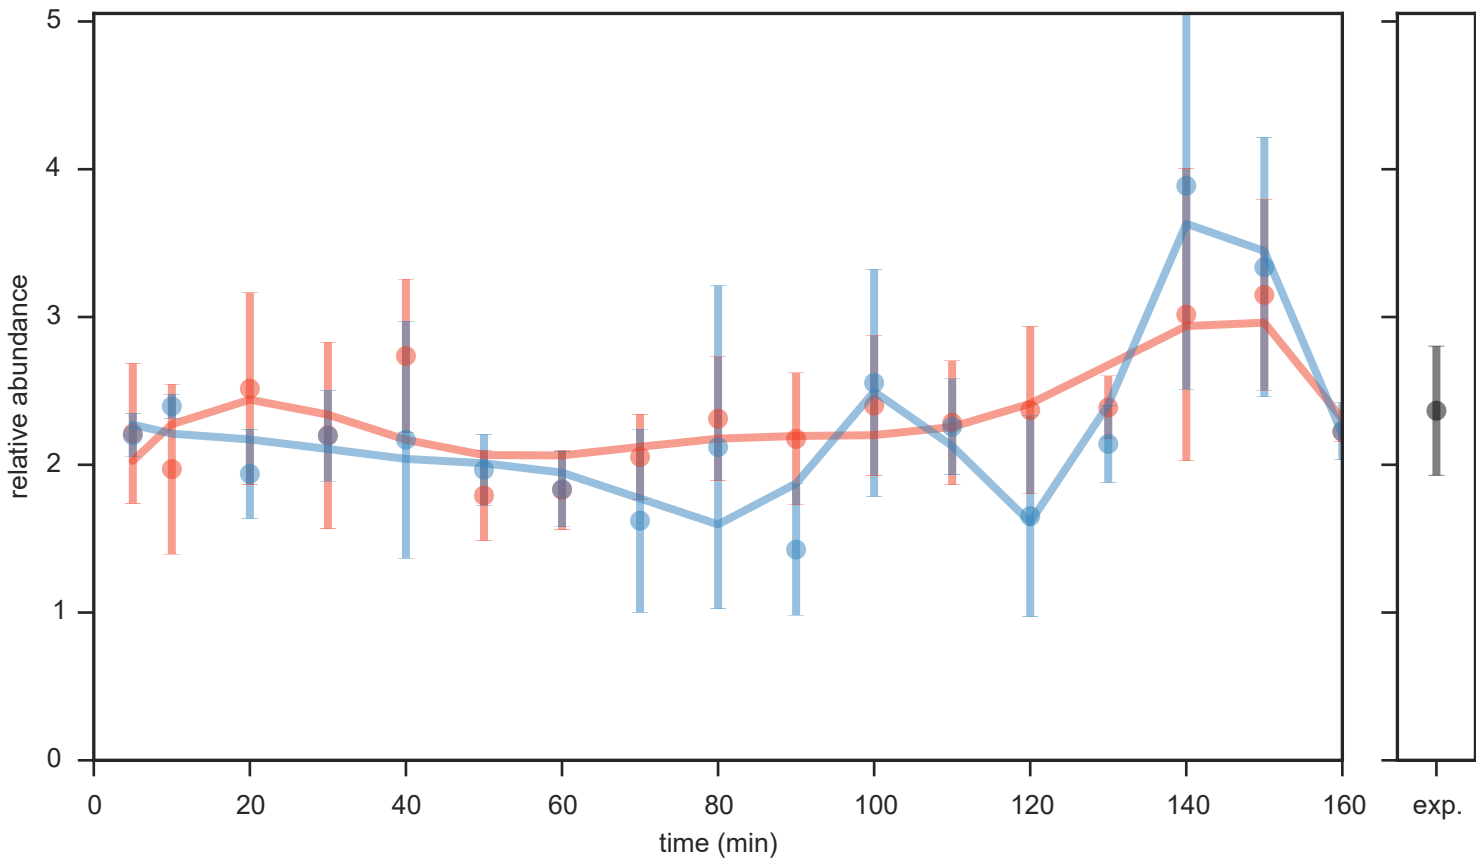

idms\_pid191\_mz417.32

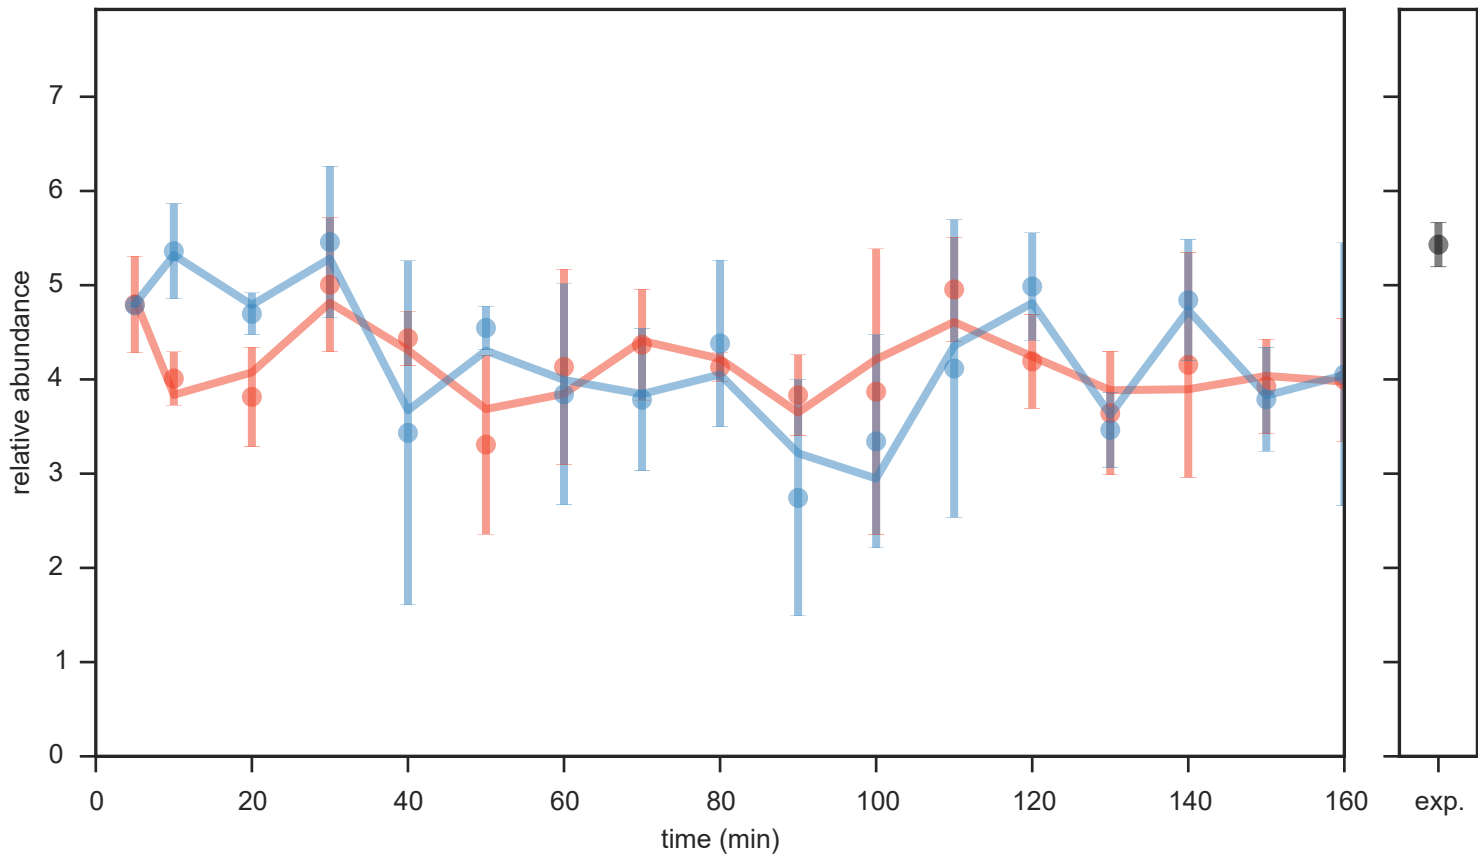

idms\_pid194\_mz132.10

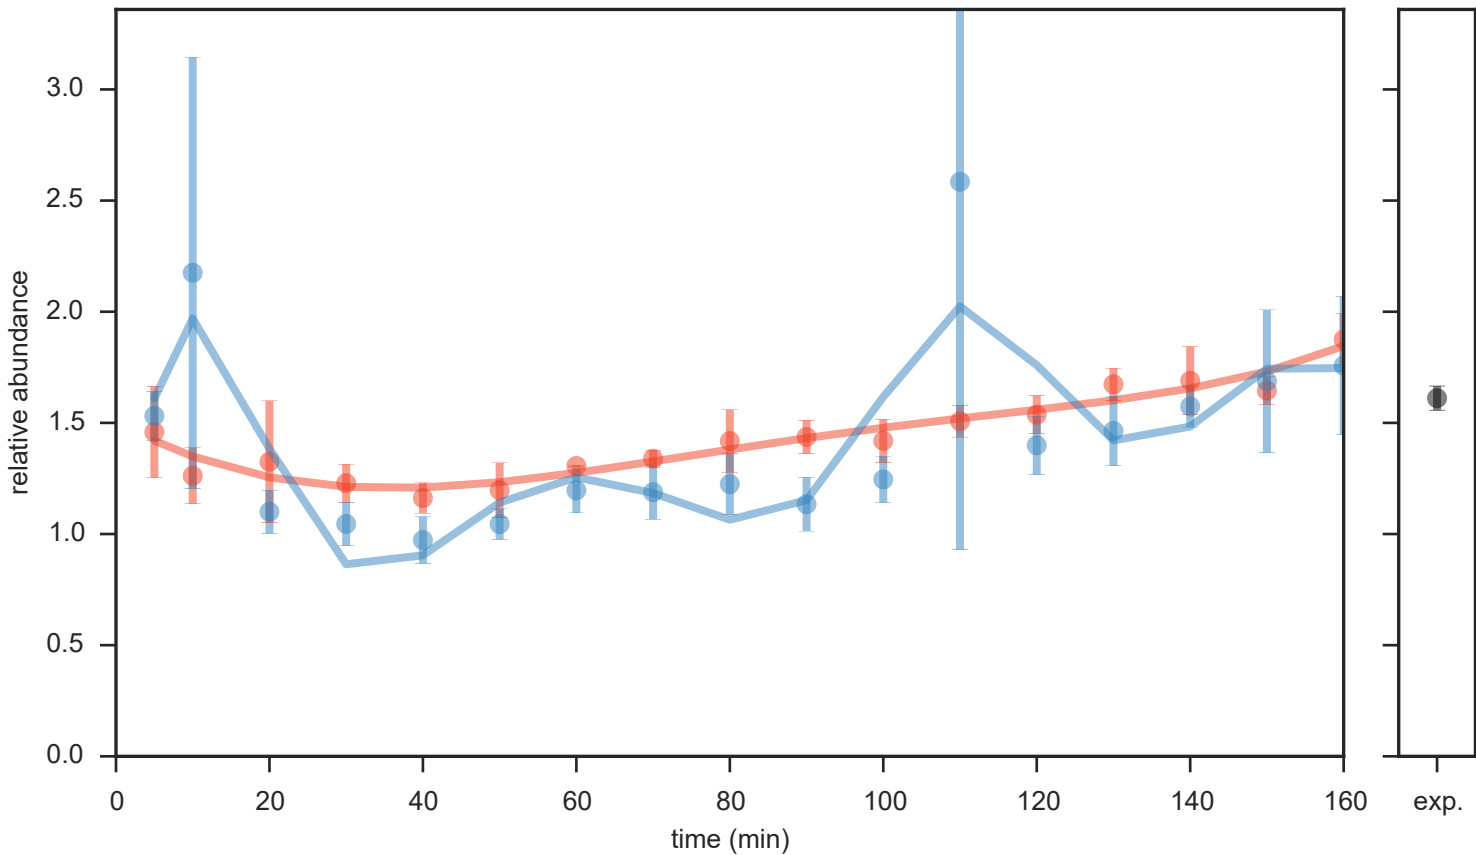

idms\_pid203\_mz232.20

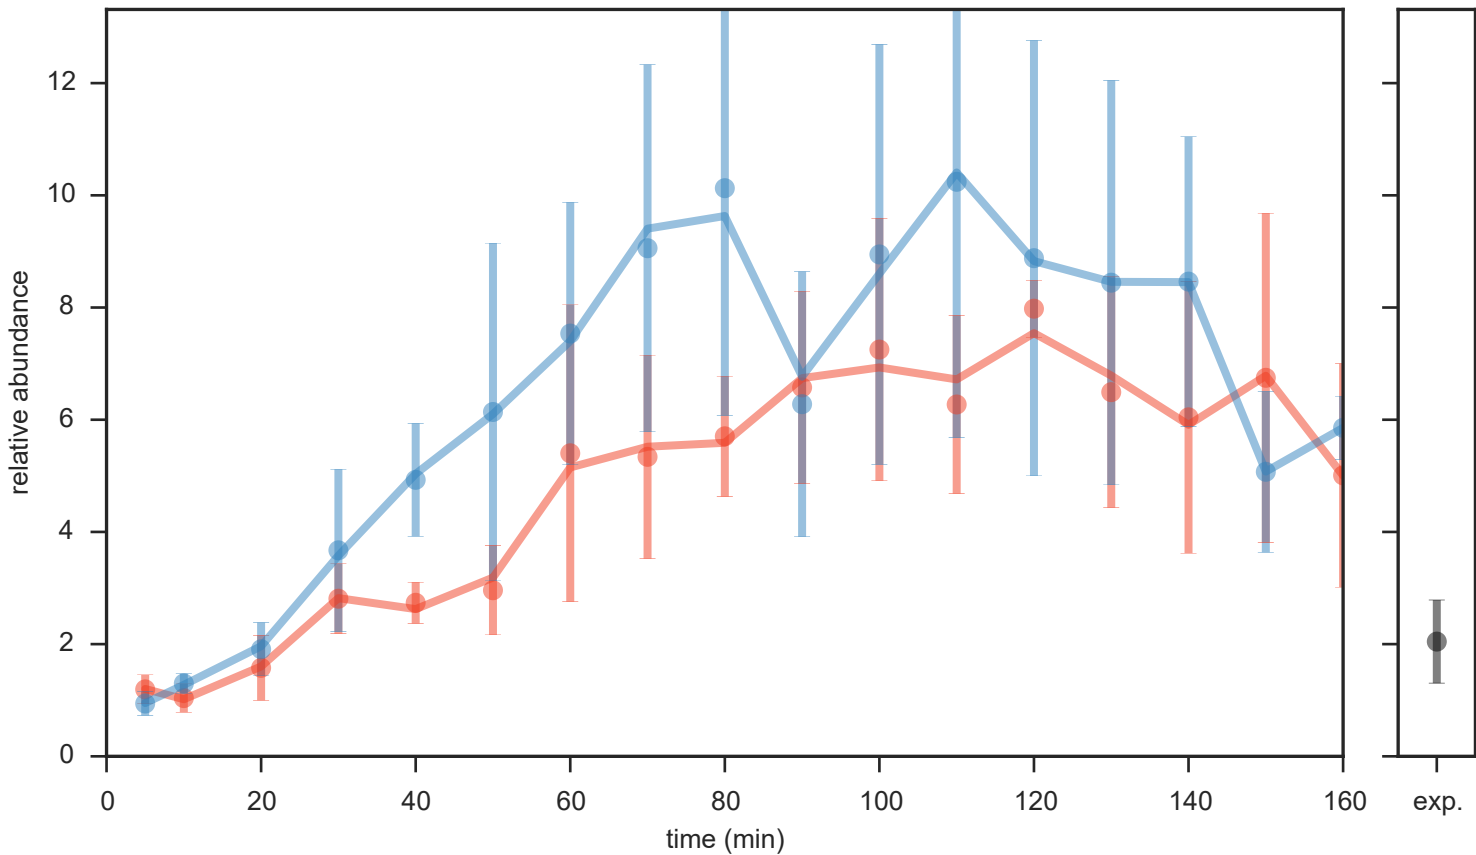

idms\_pid210\_mz133.09

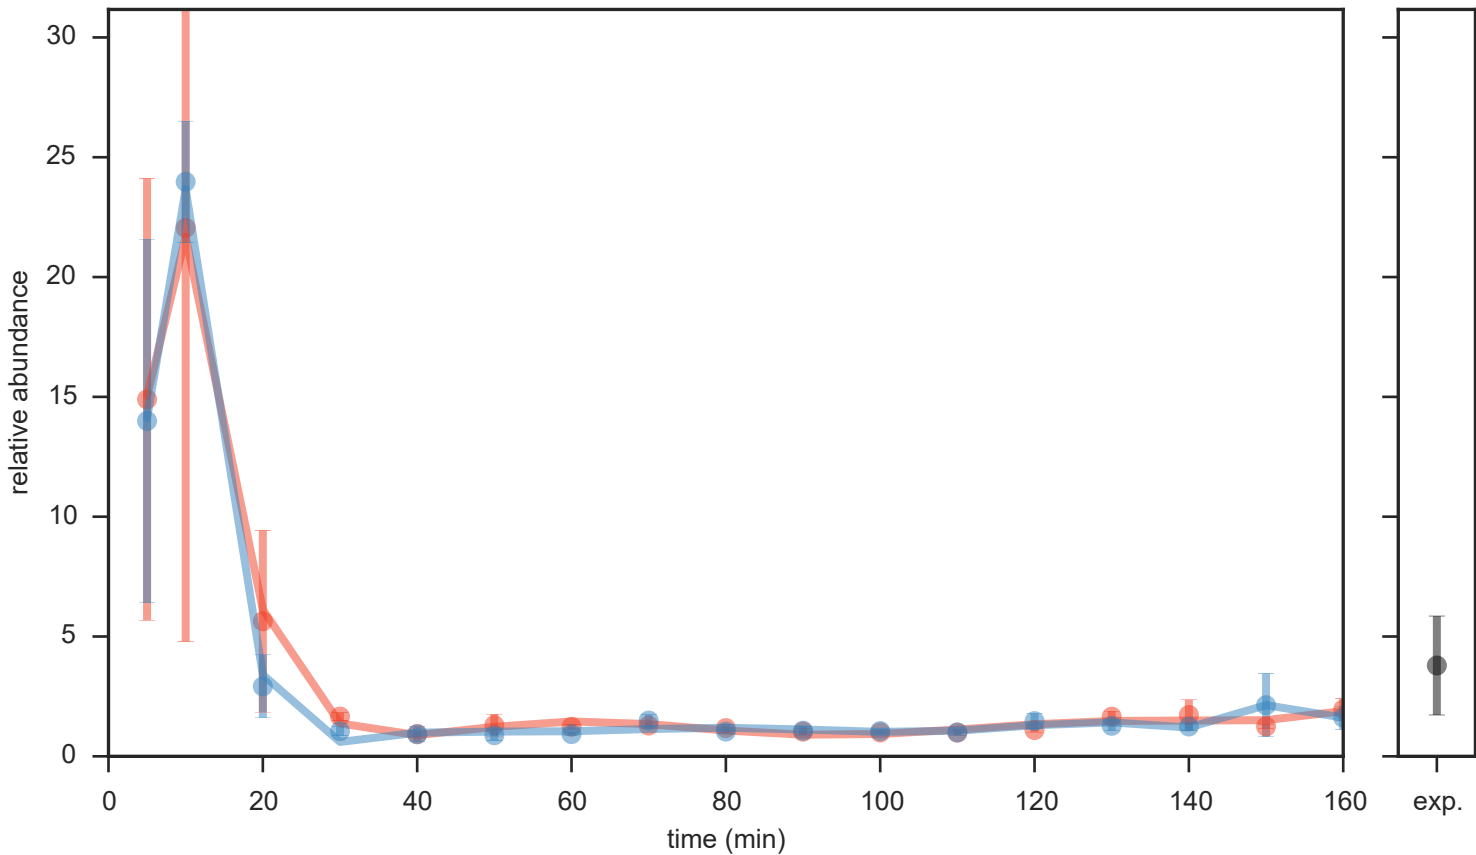

idms\_pid217\_mz300.09

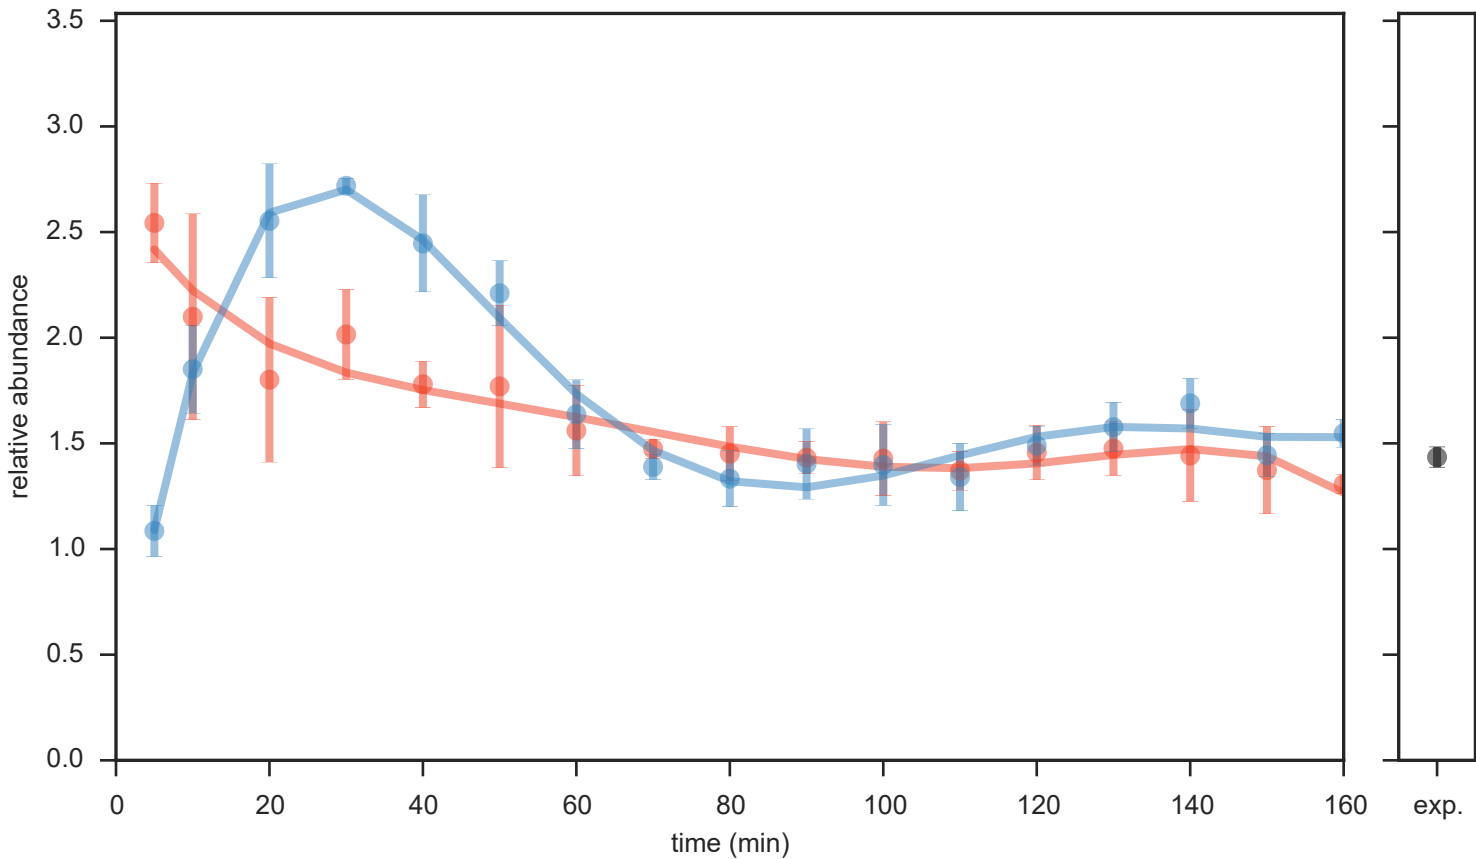

idms\_pid220\_mz414.04

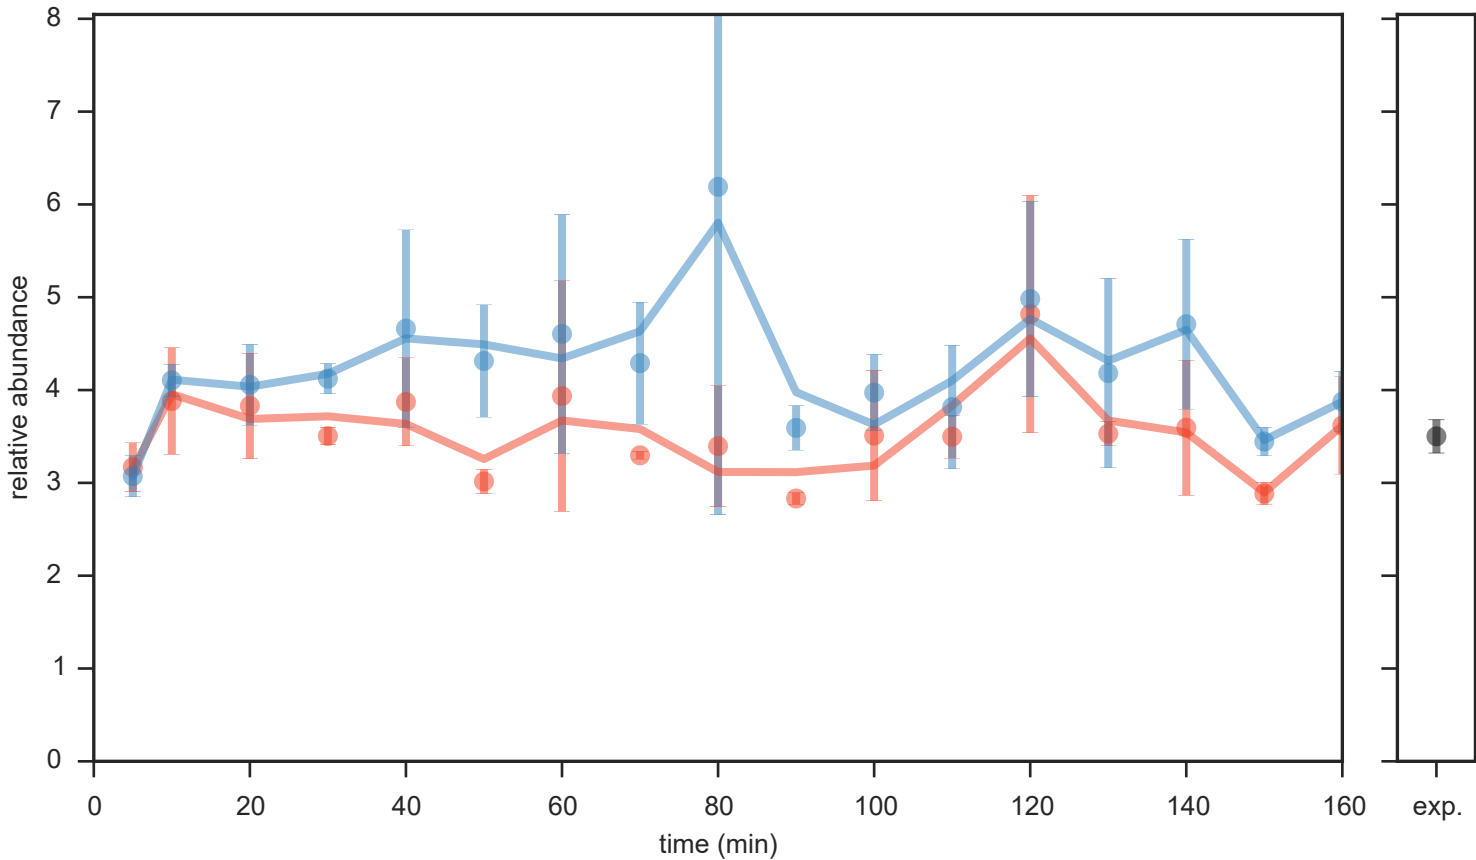



idms\_pid221\_mz182.16

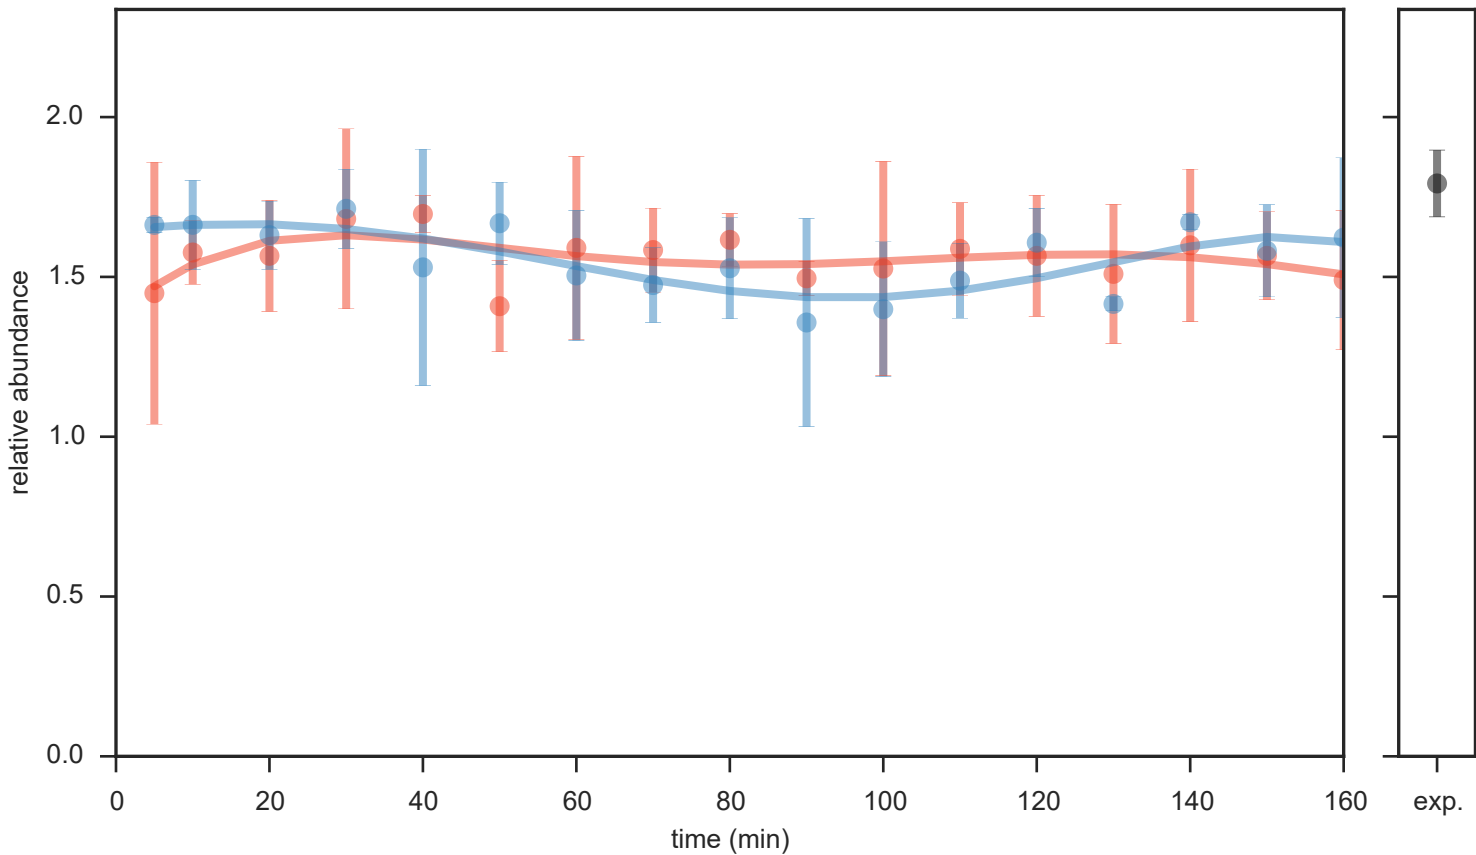

idms\_pid223\_mz173.13

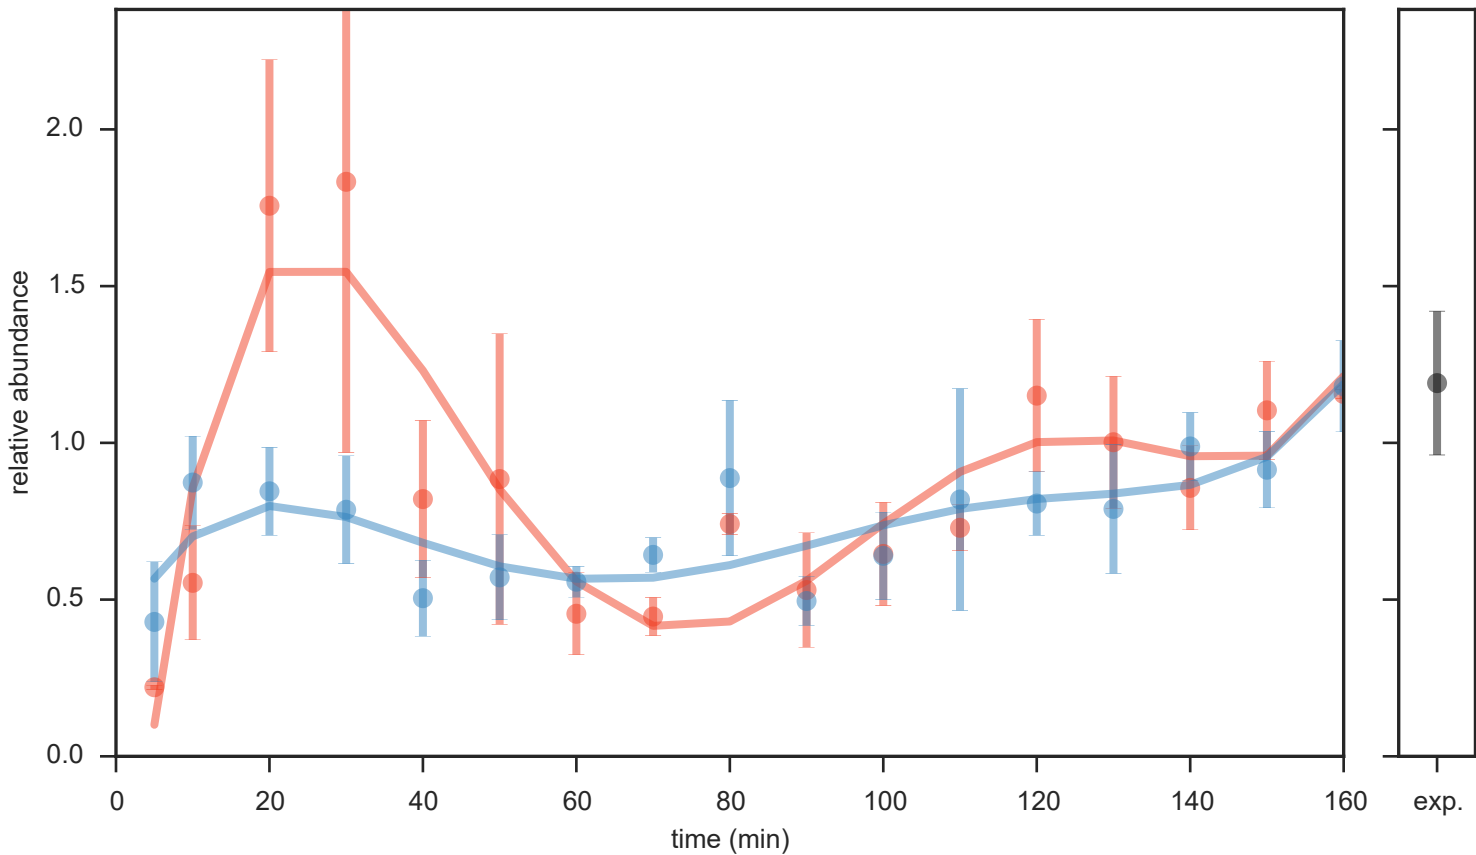

idms\_pid229\_mz134.04

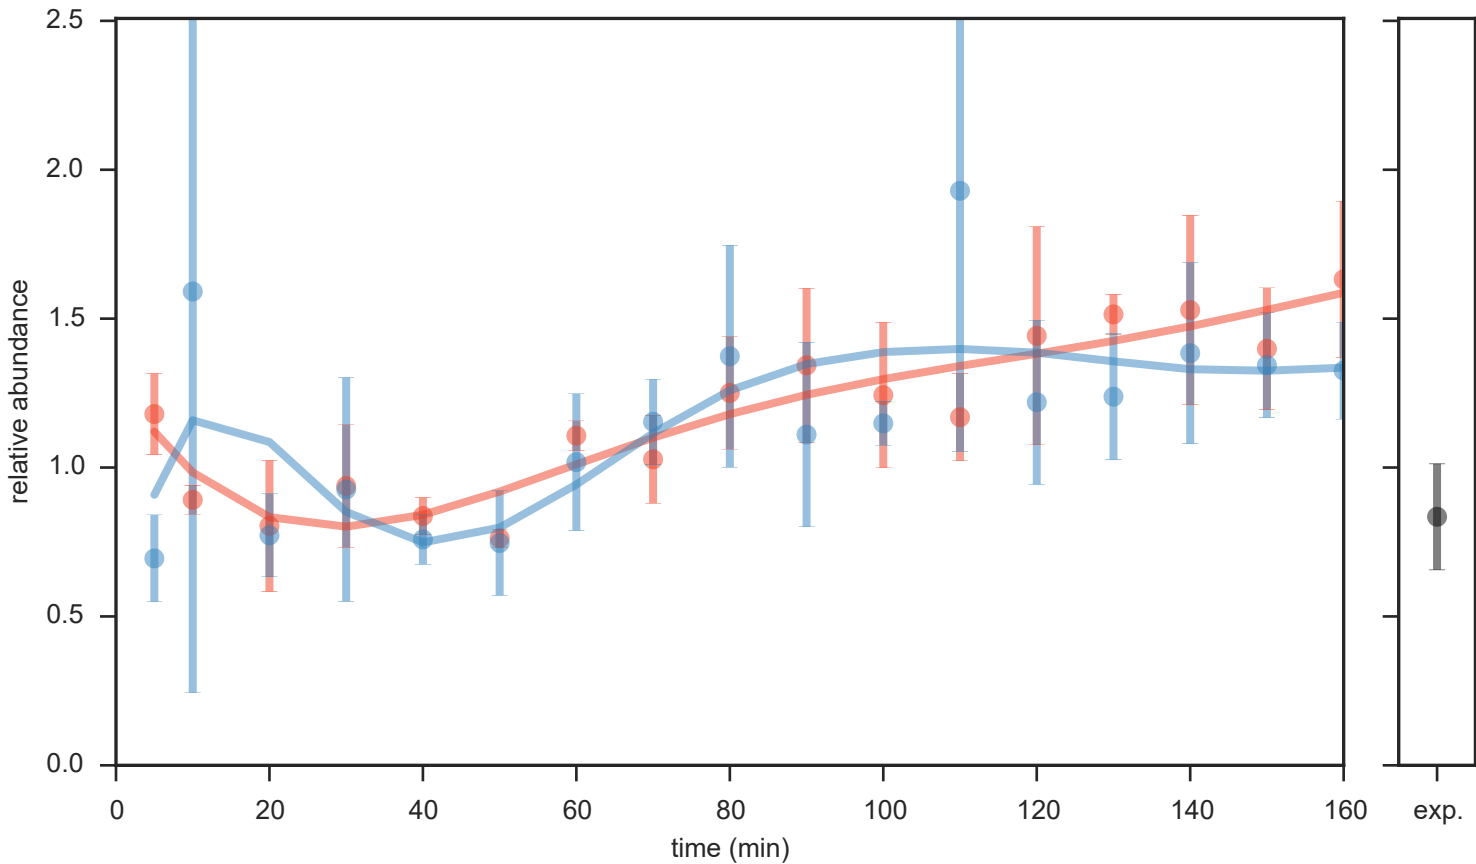

idms\_pid230\_mz274.02

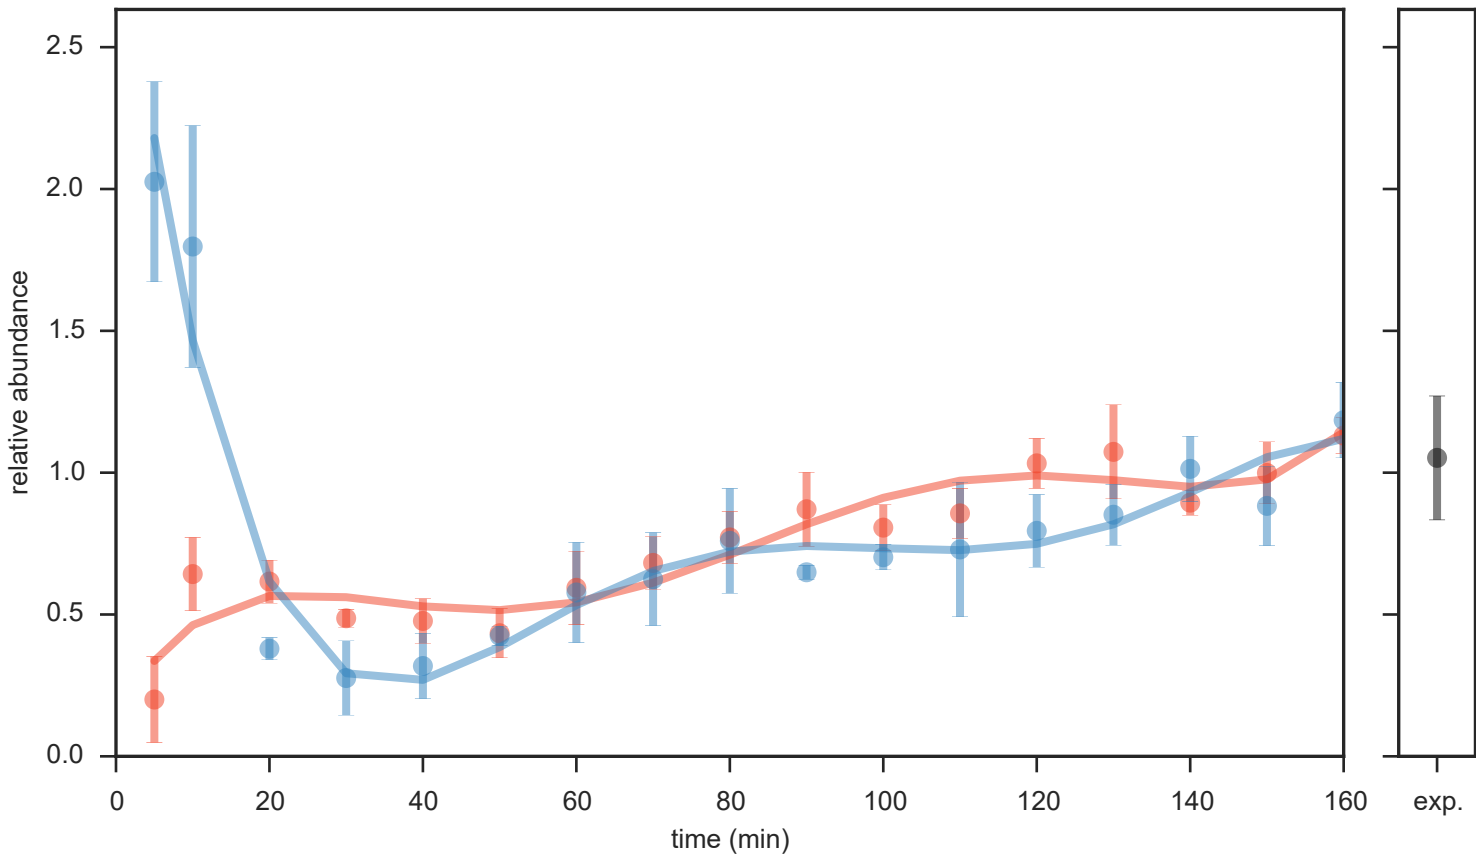

idms\_pid233\_mz275.00

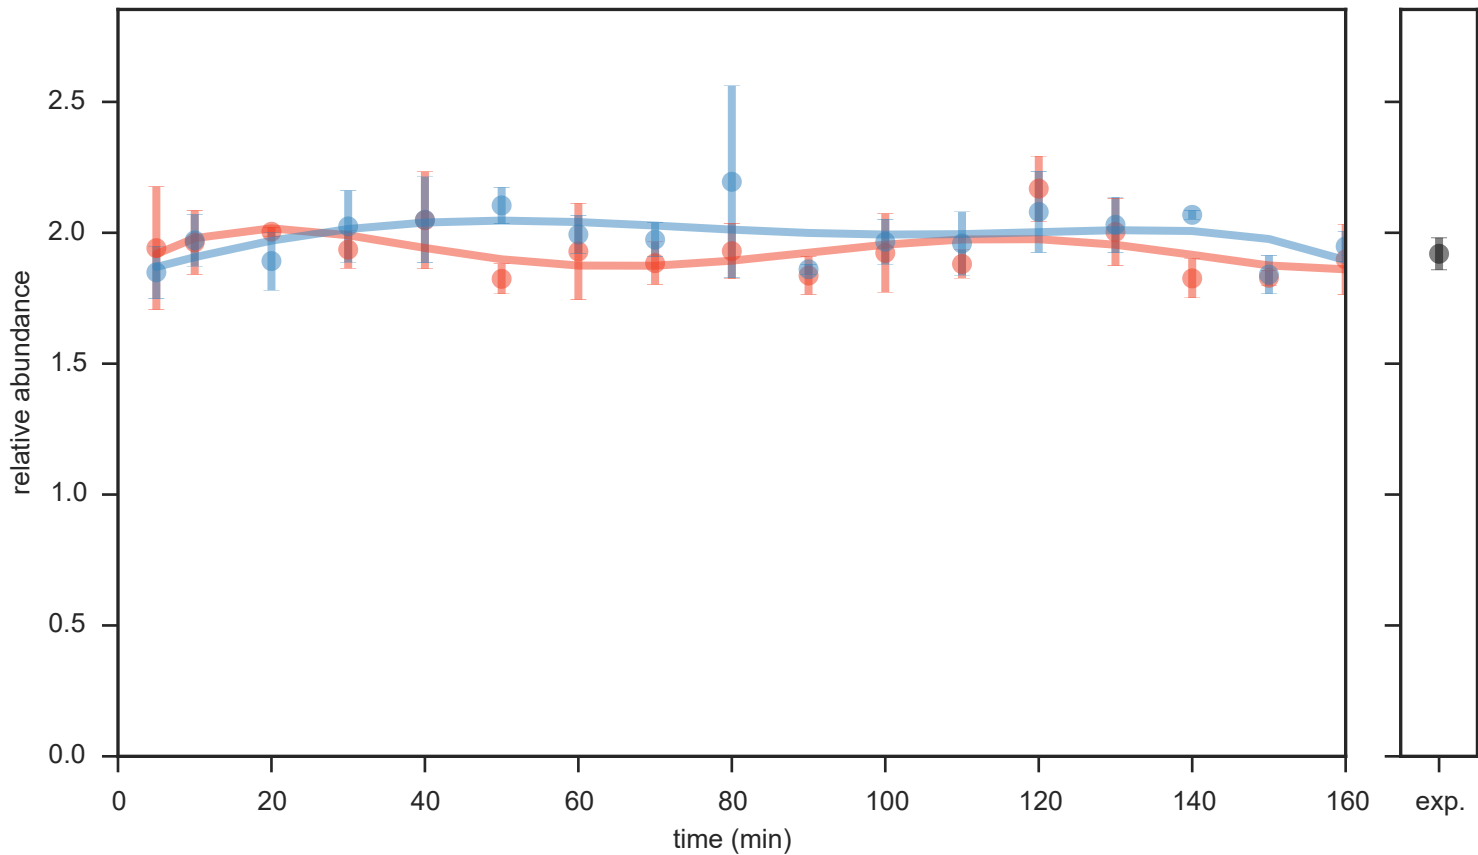

idms\_pid237\_mz147.07

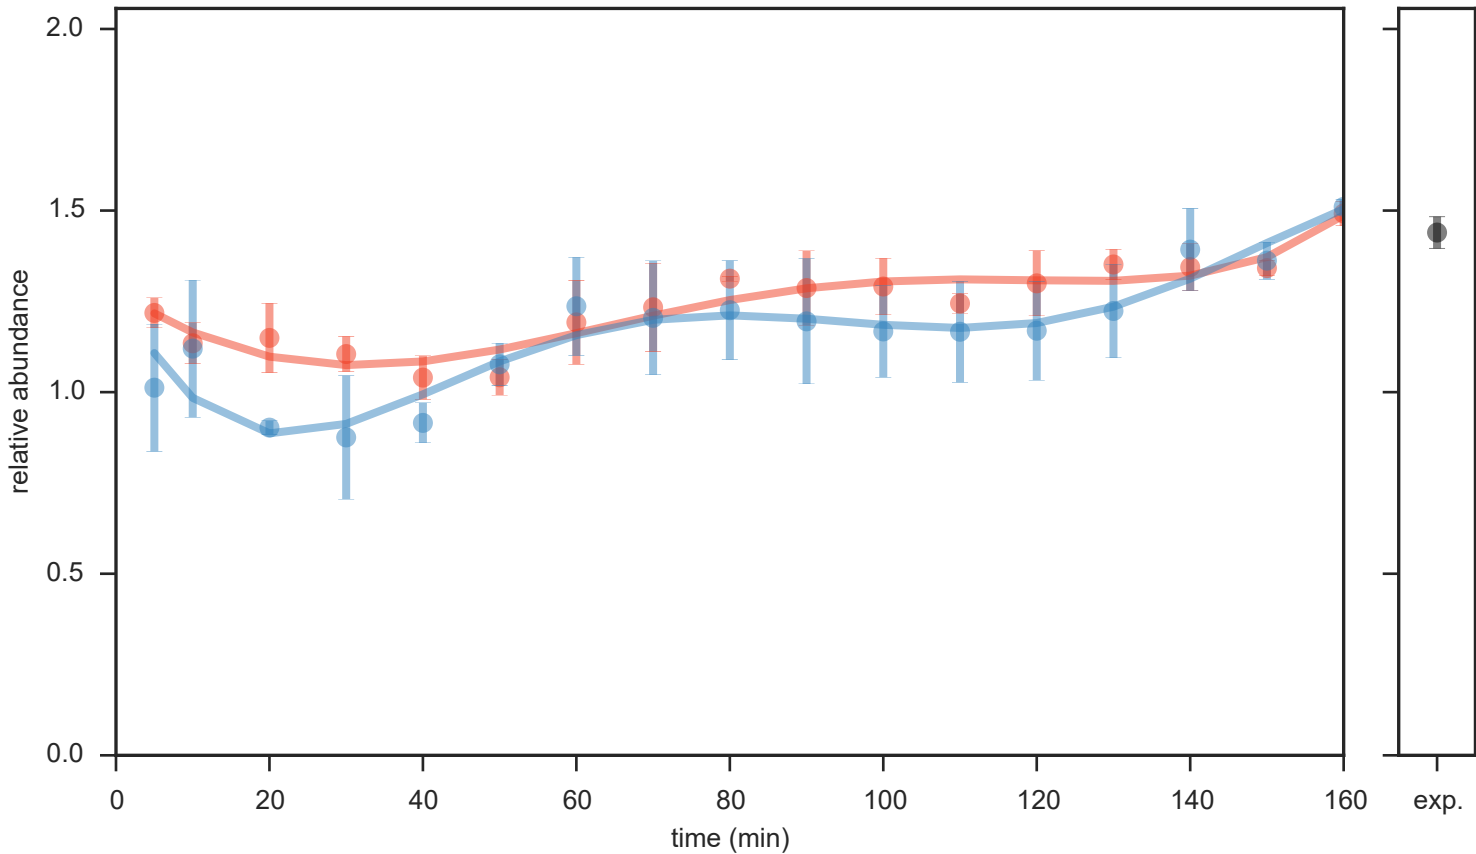

idms\_pid240\_mz383.11

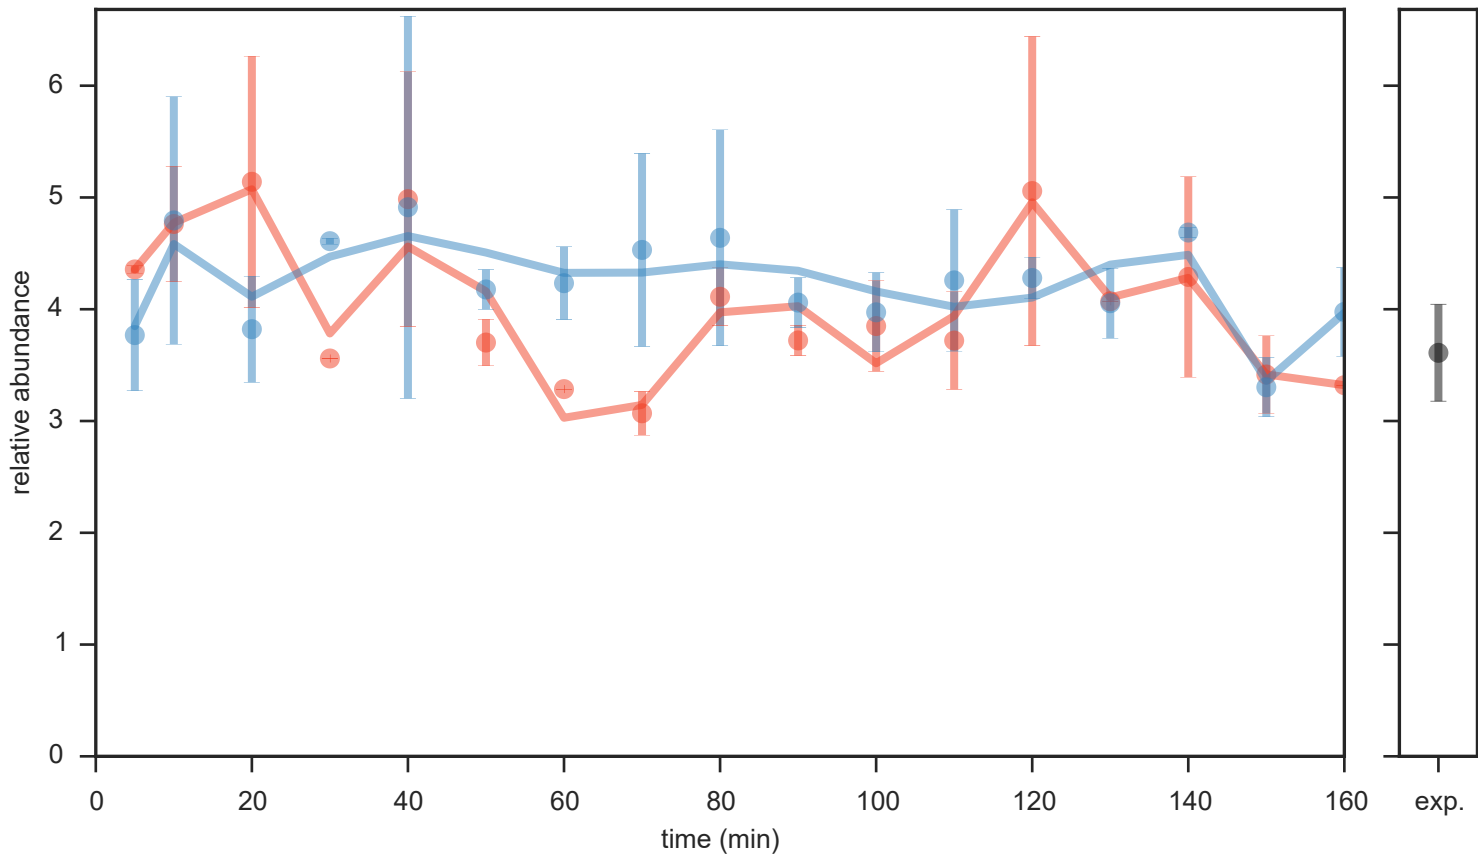

idms\_pid241\_mz333.16

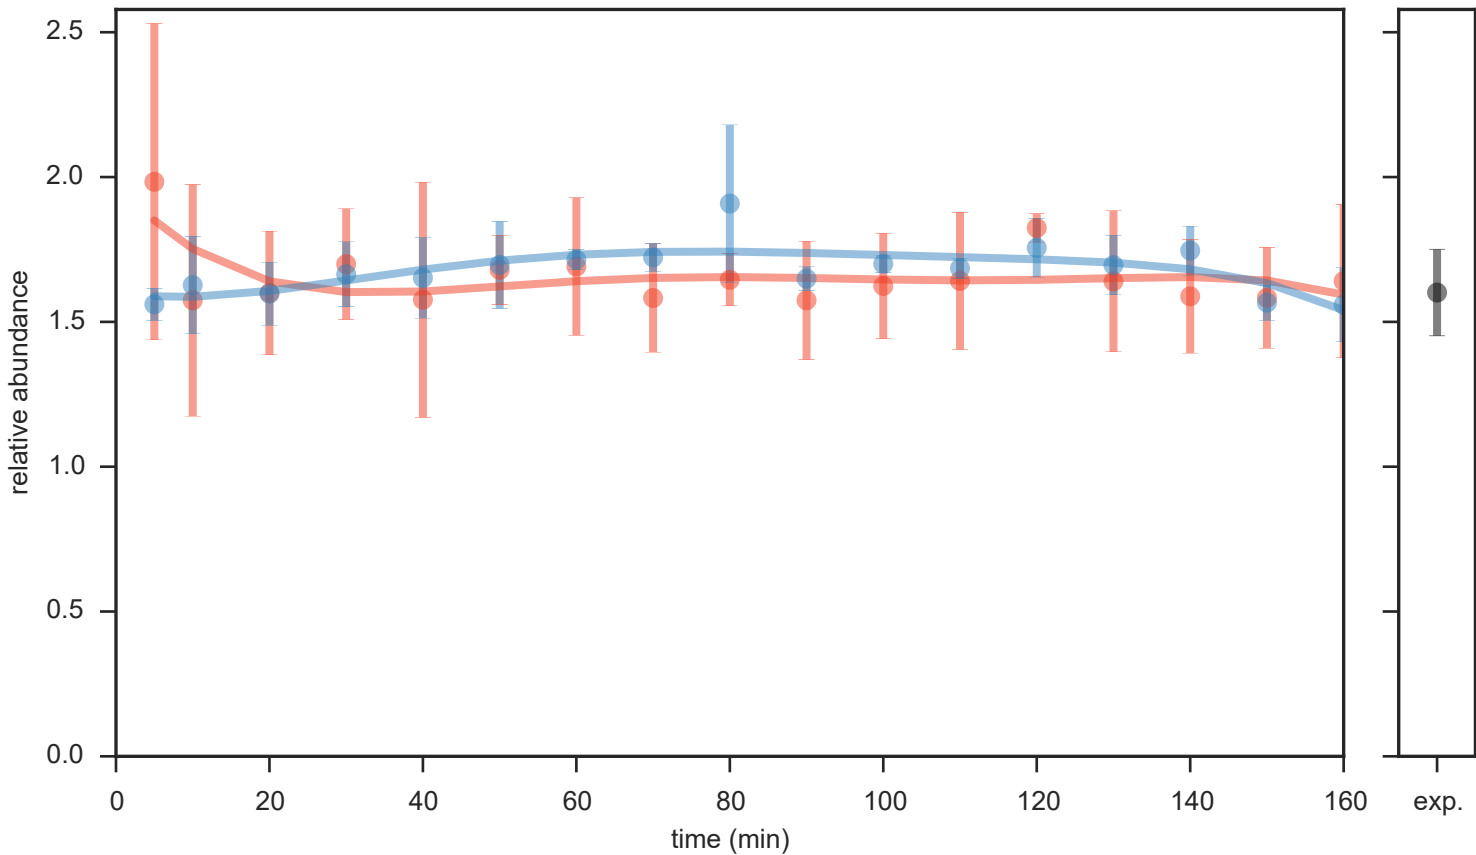



idms\_pid244\_mz182.08

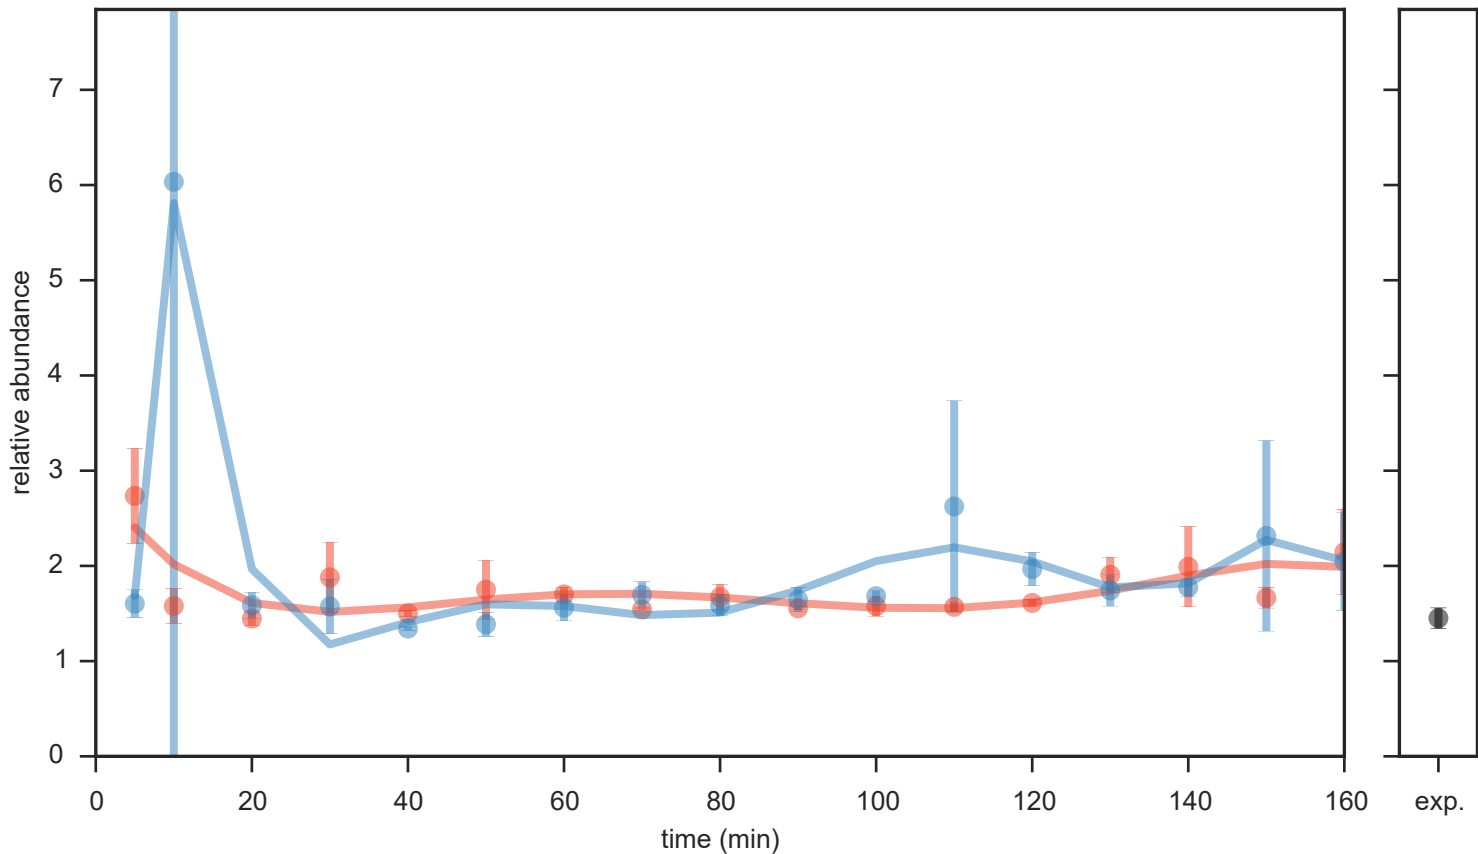

idms\_pid245\_mz203.18

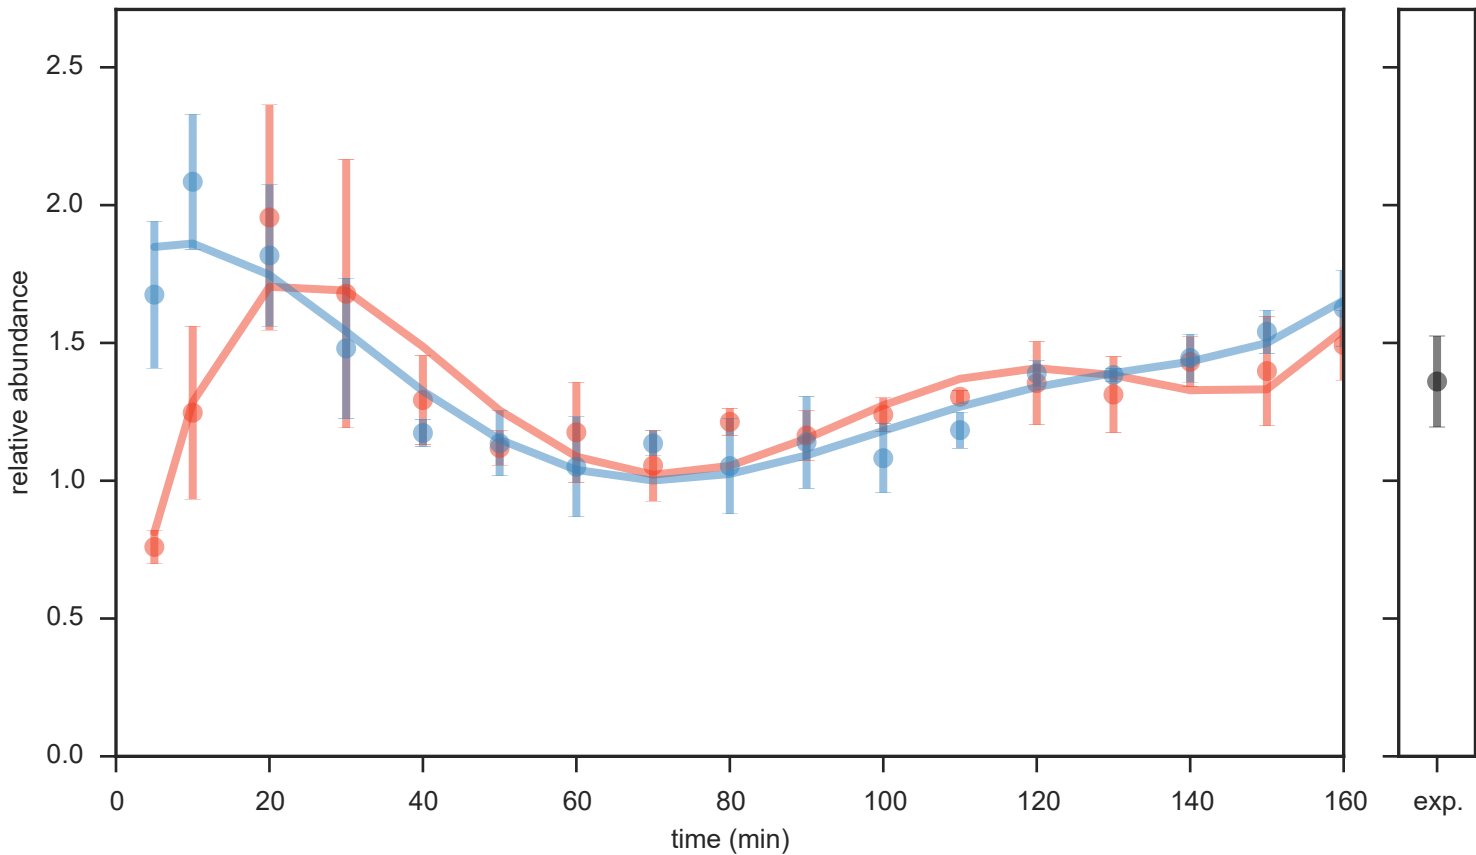

idms\_pid256\_mz301.15

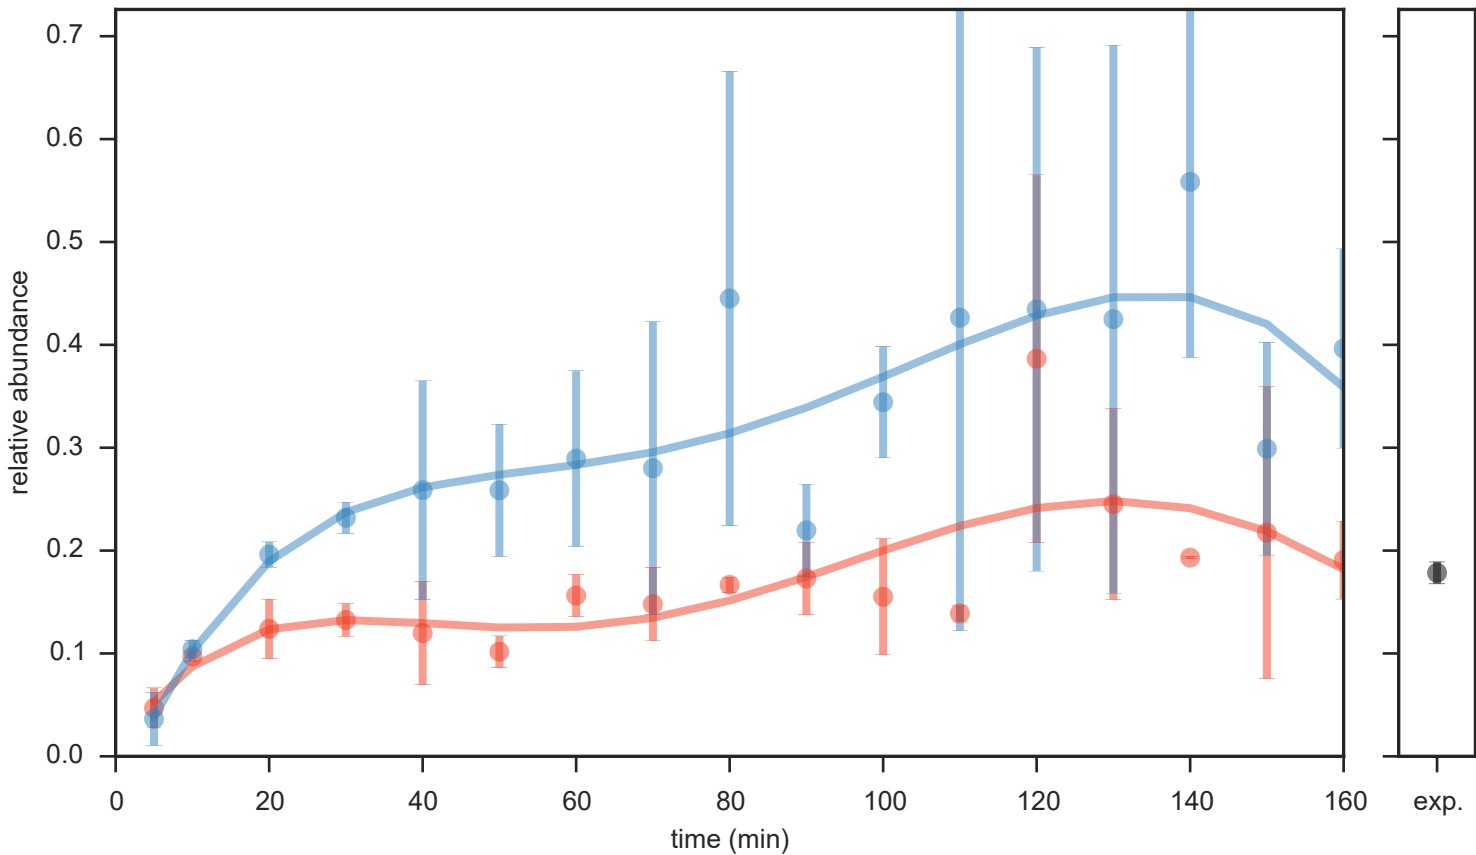

idms\_pid261\_mz88.050

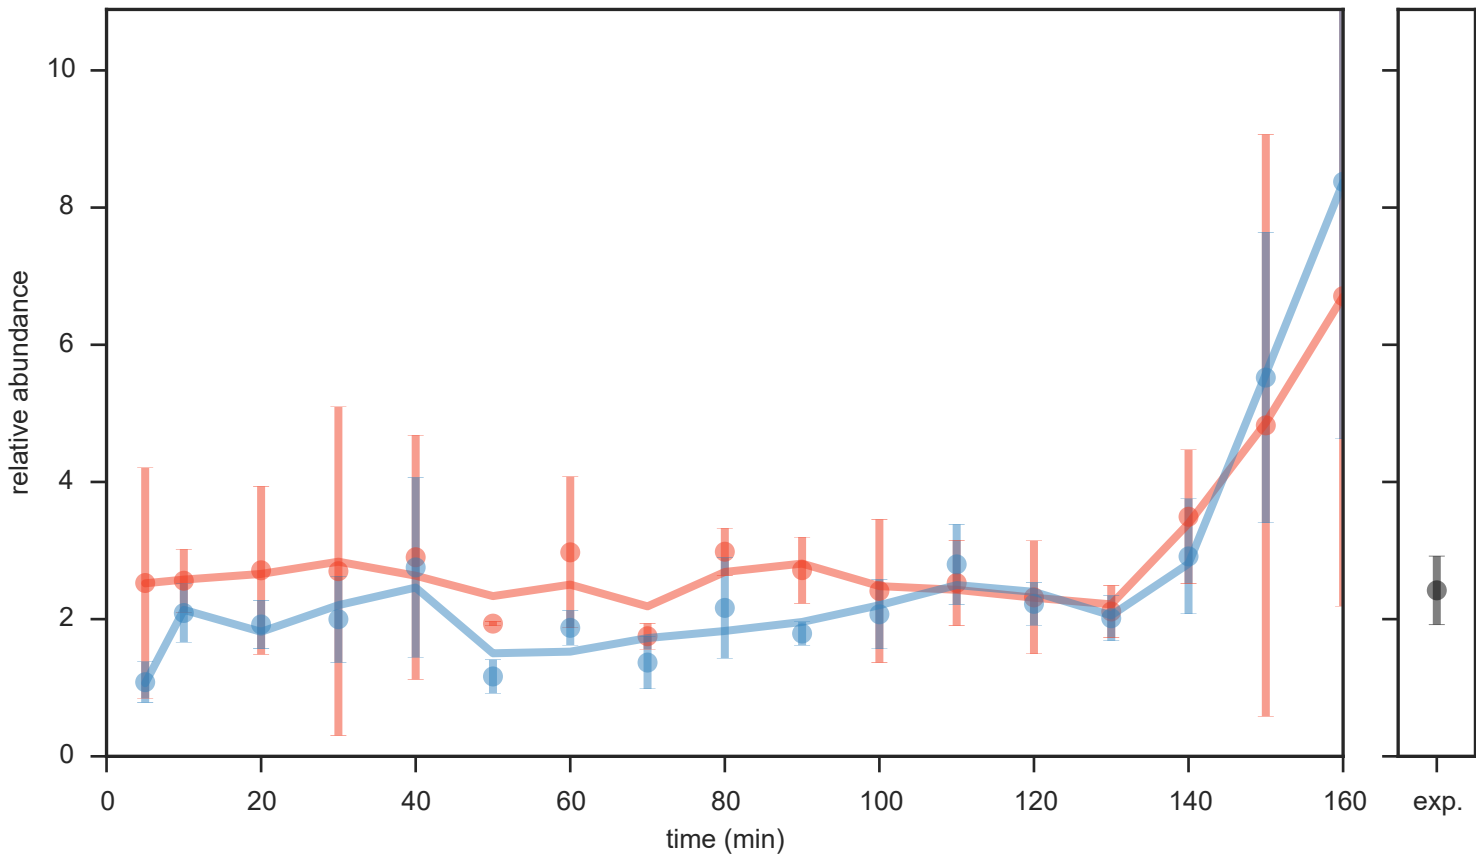

idms\_pid270\_mz324.05

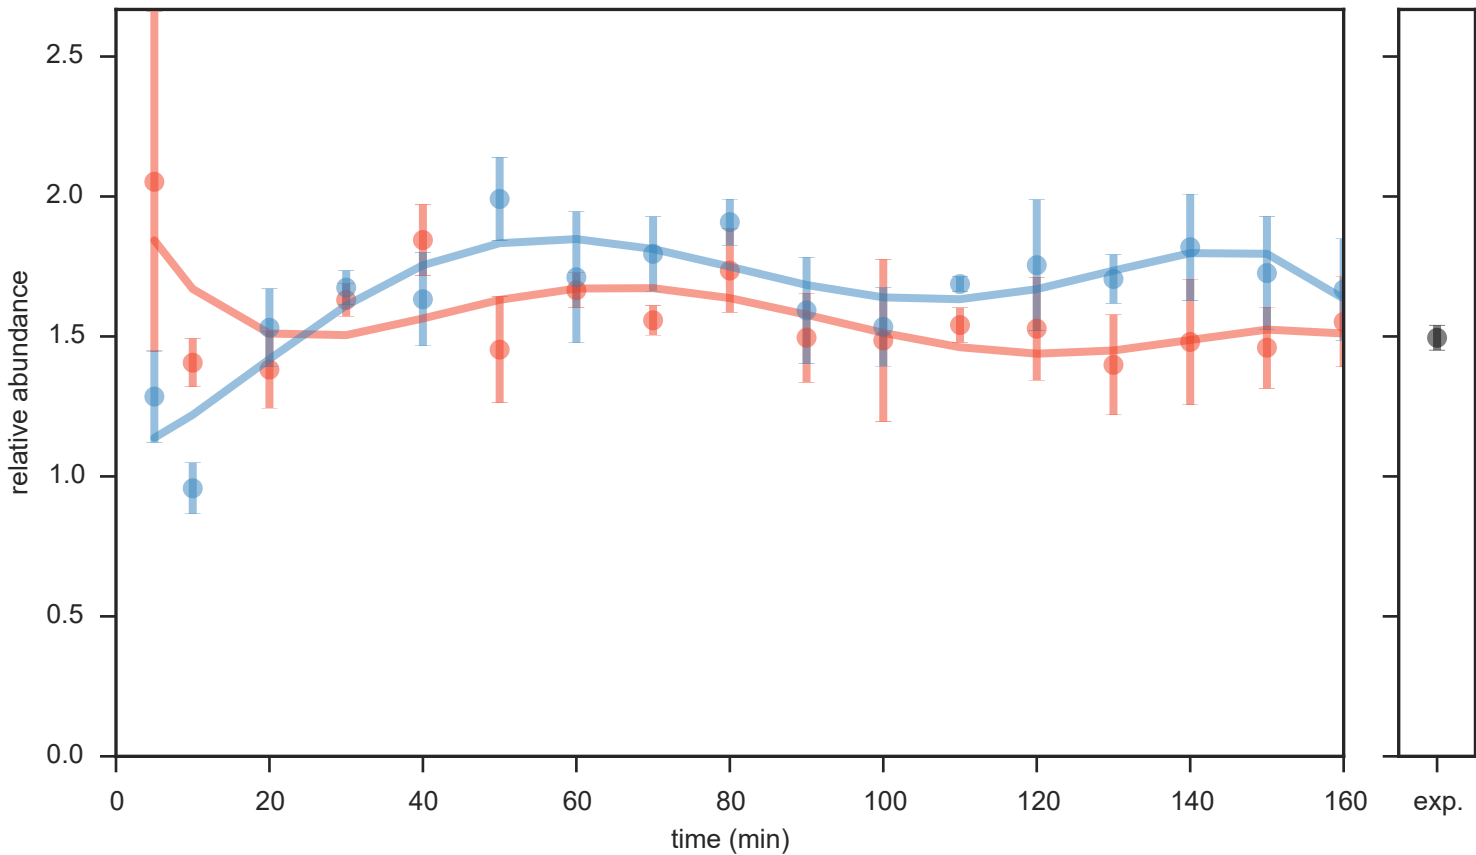

idms\_pid276\_mz348.07

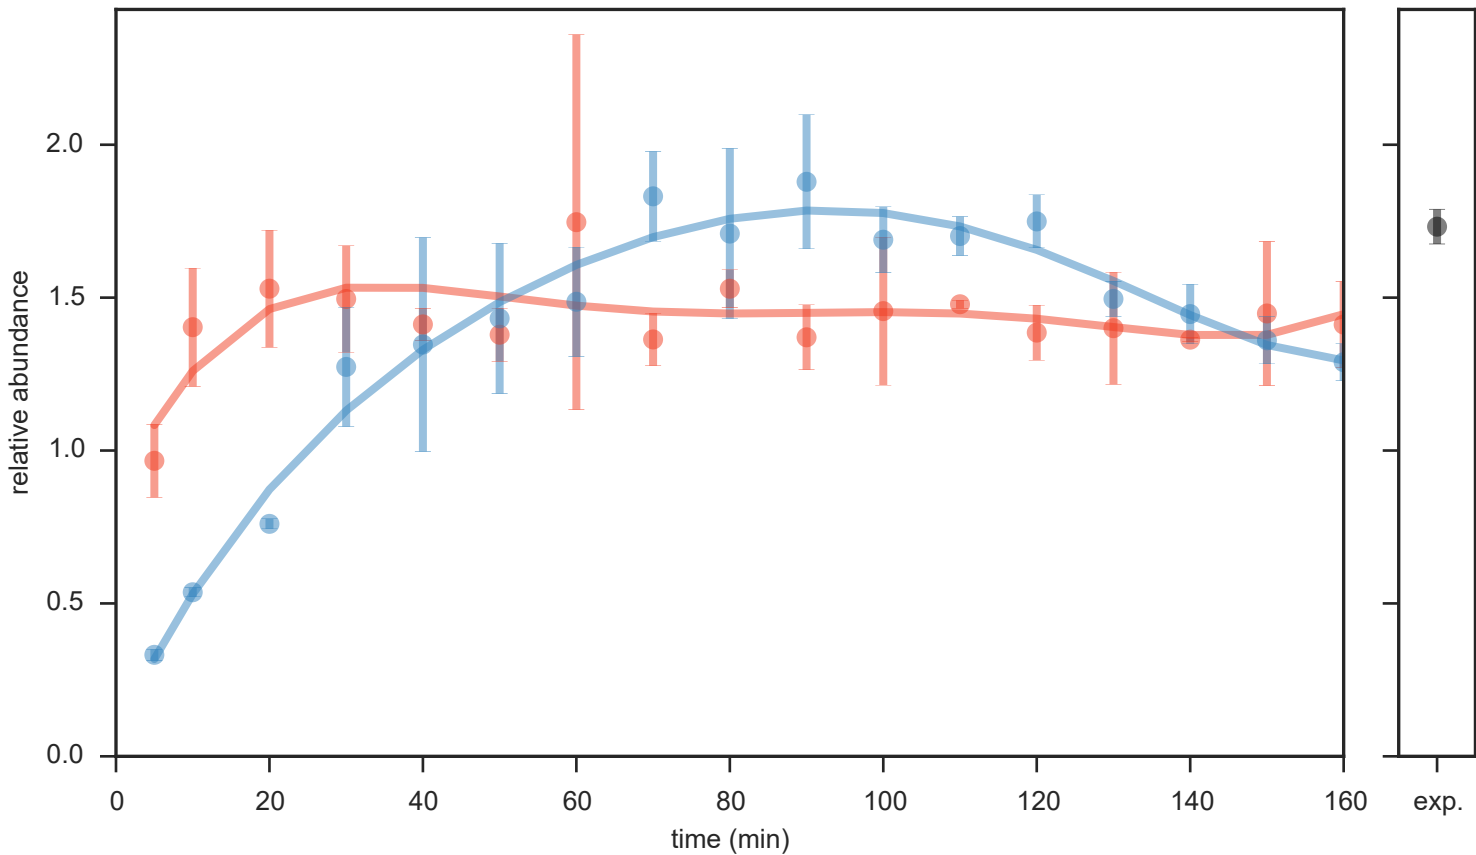

idms\_pid278\_mz86.096

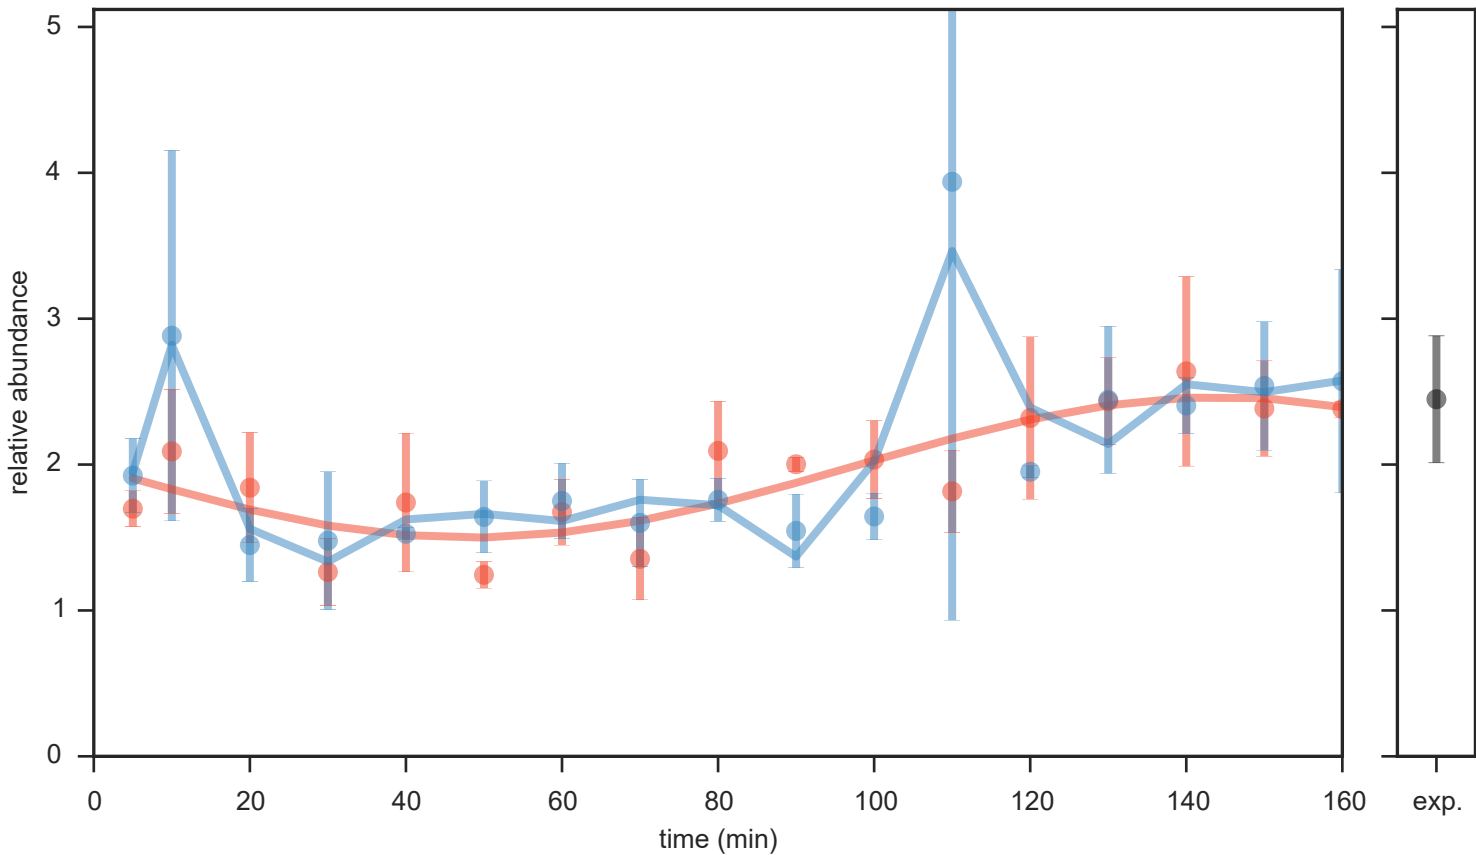

idms\_pid287\_mz414.04

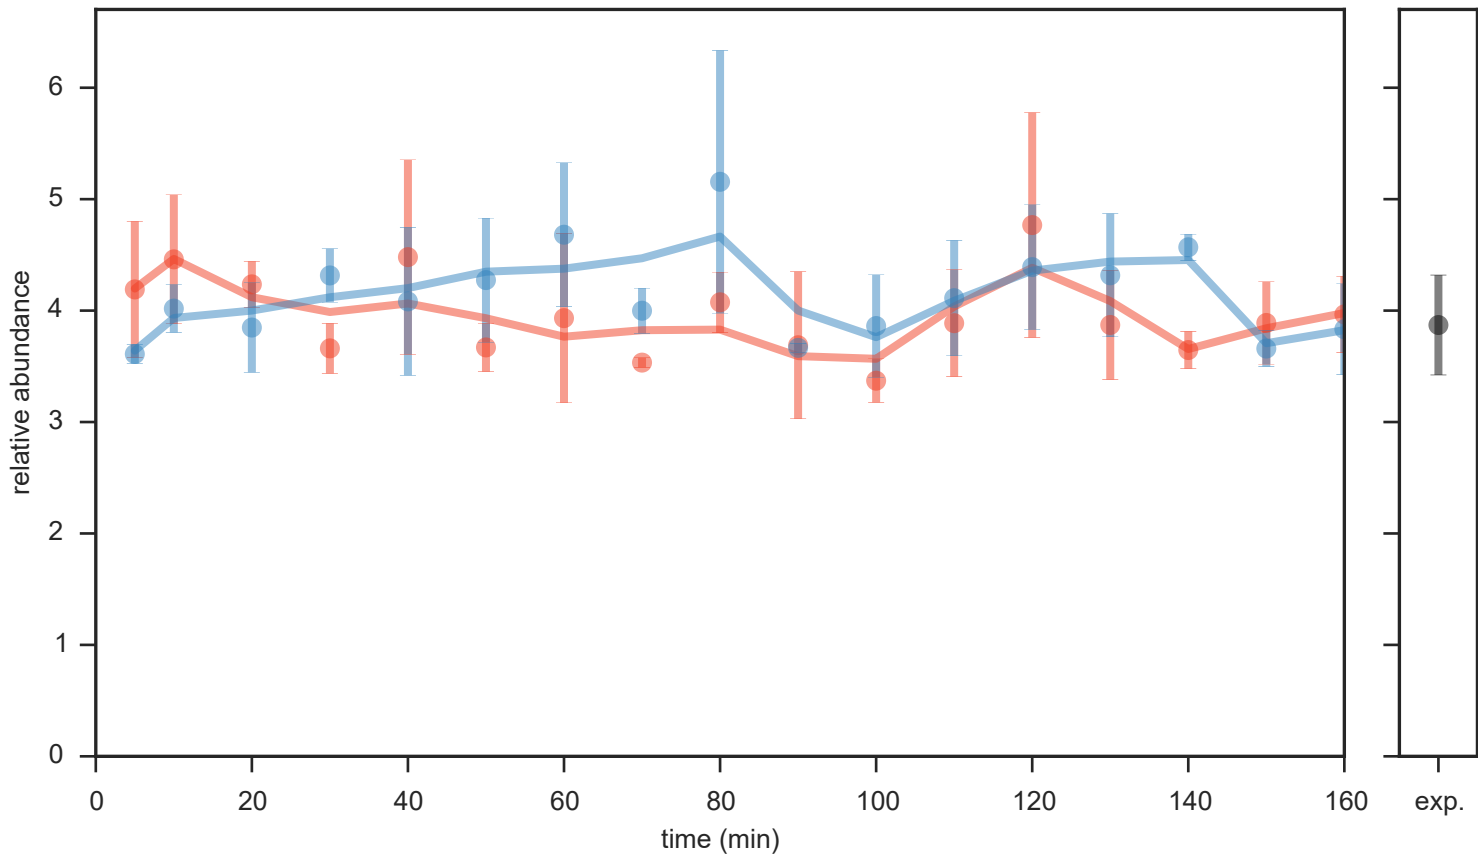



idms\_pid300\_mz160.18

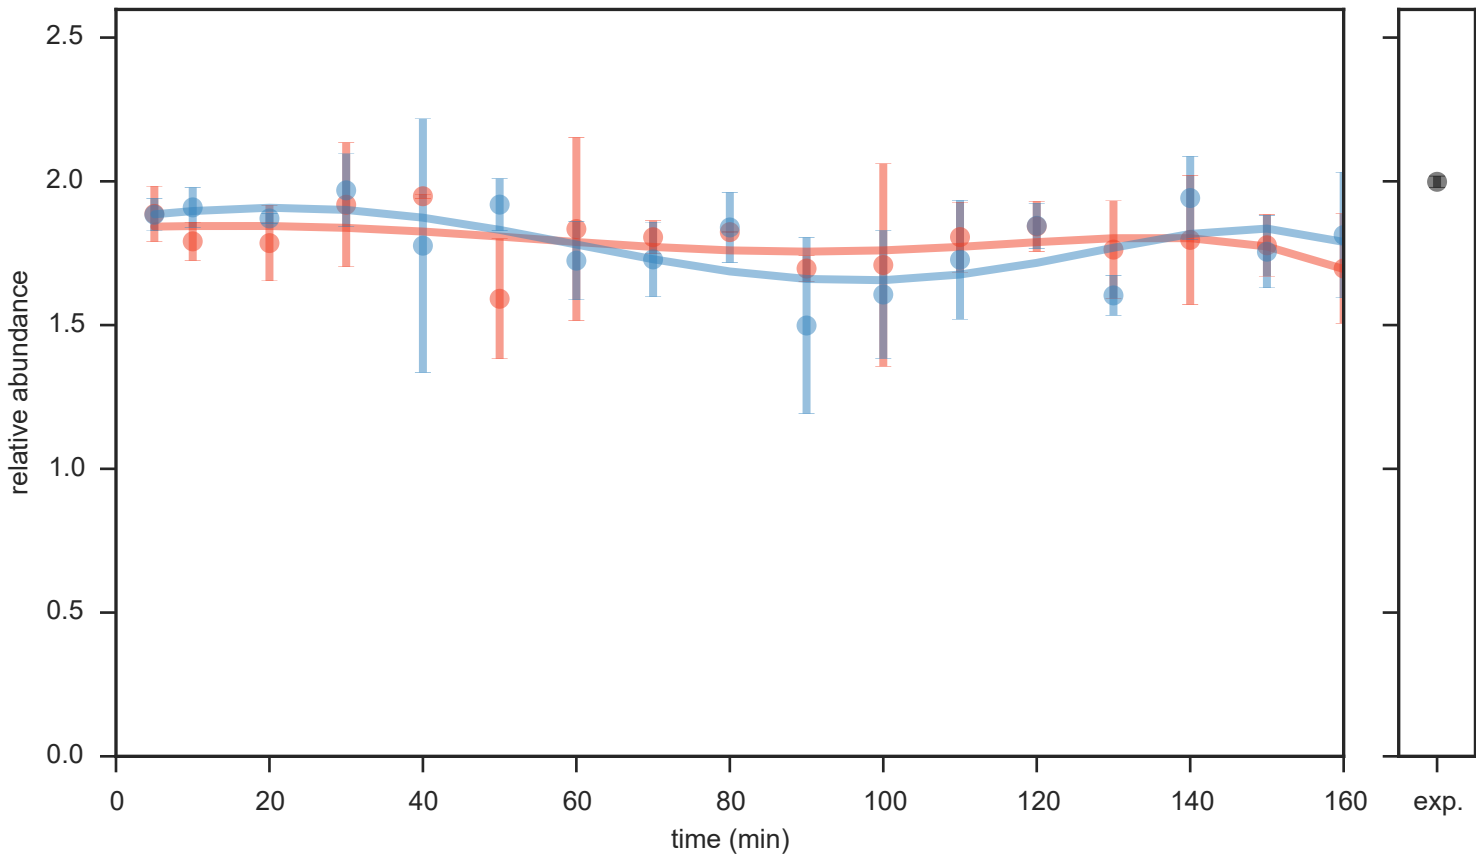

idms\_pid301\_mz269.11

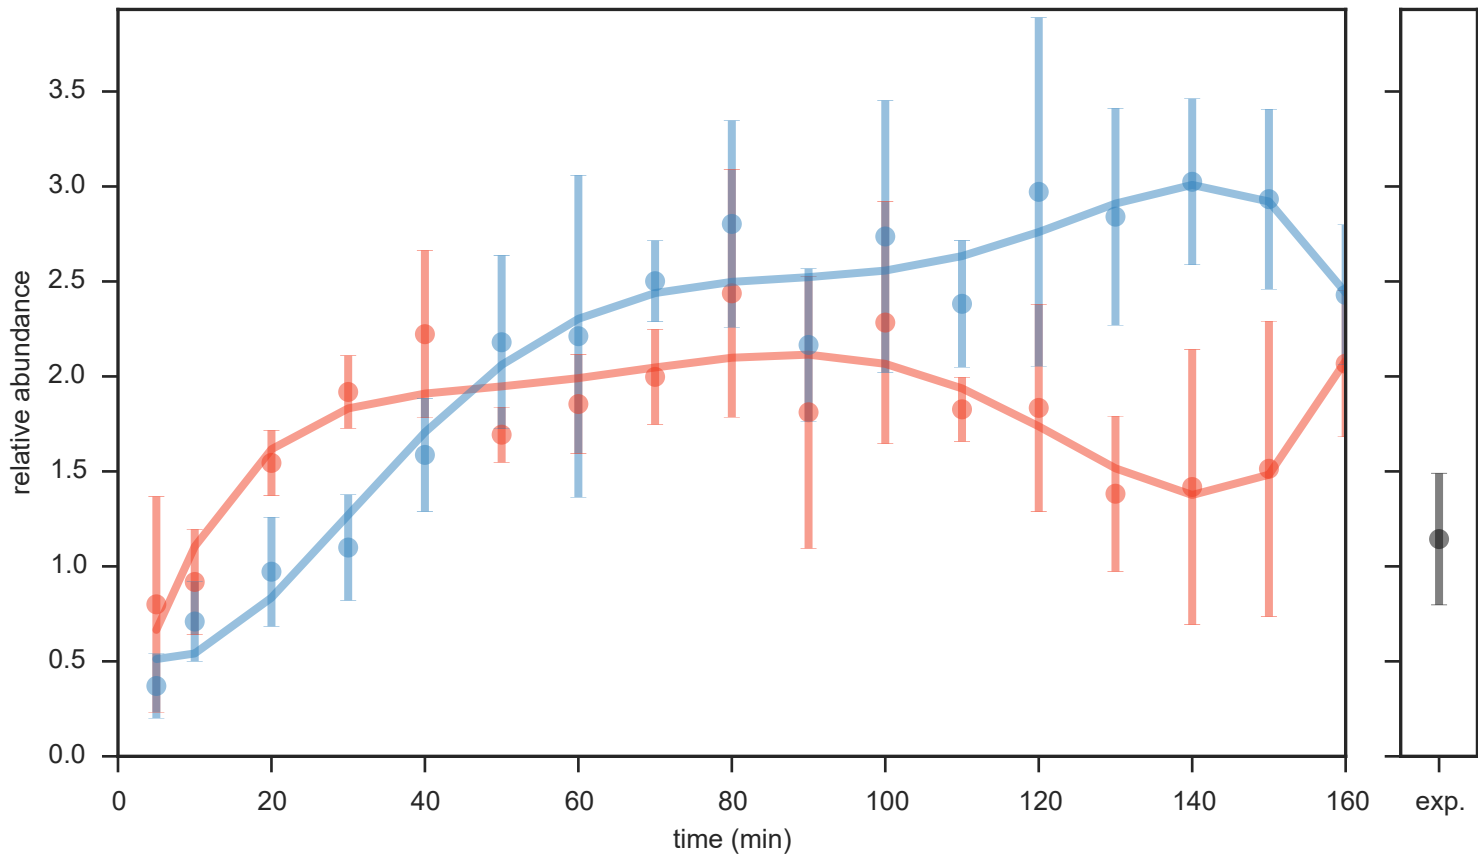

idms\_pid302\_mz290.13

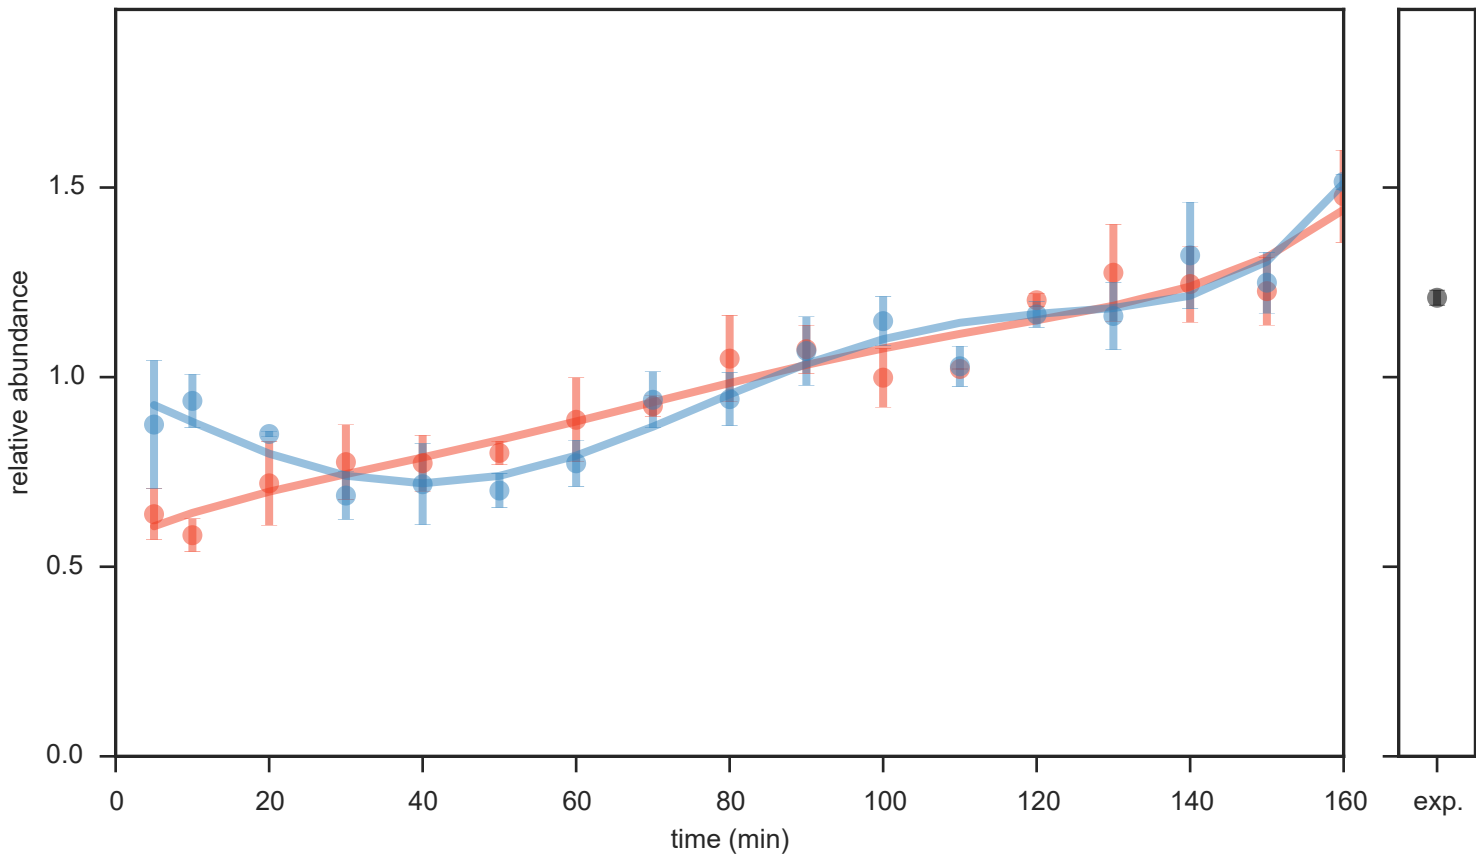

idms\_pid309\_mz198.09

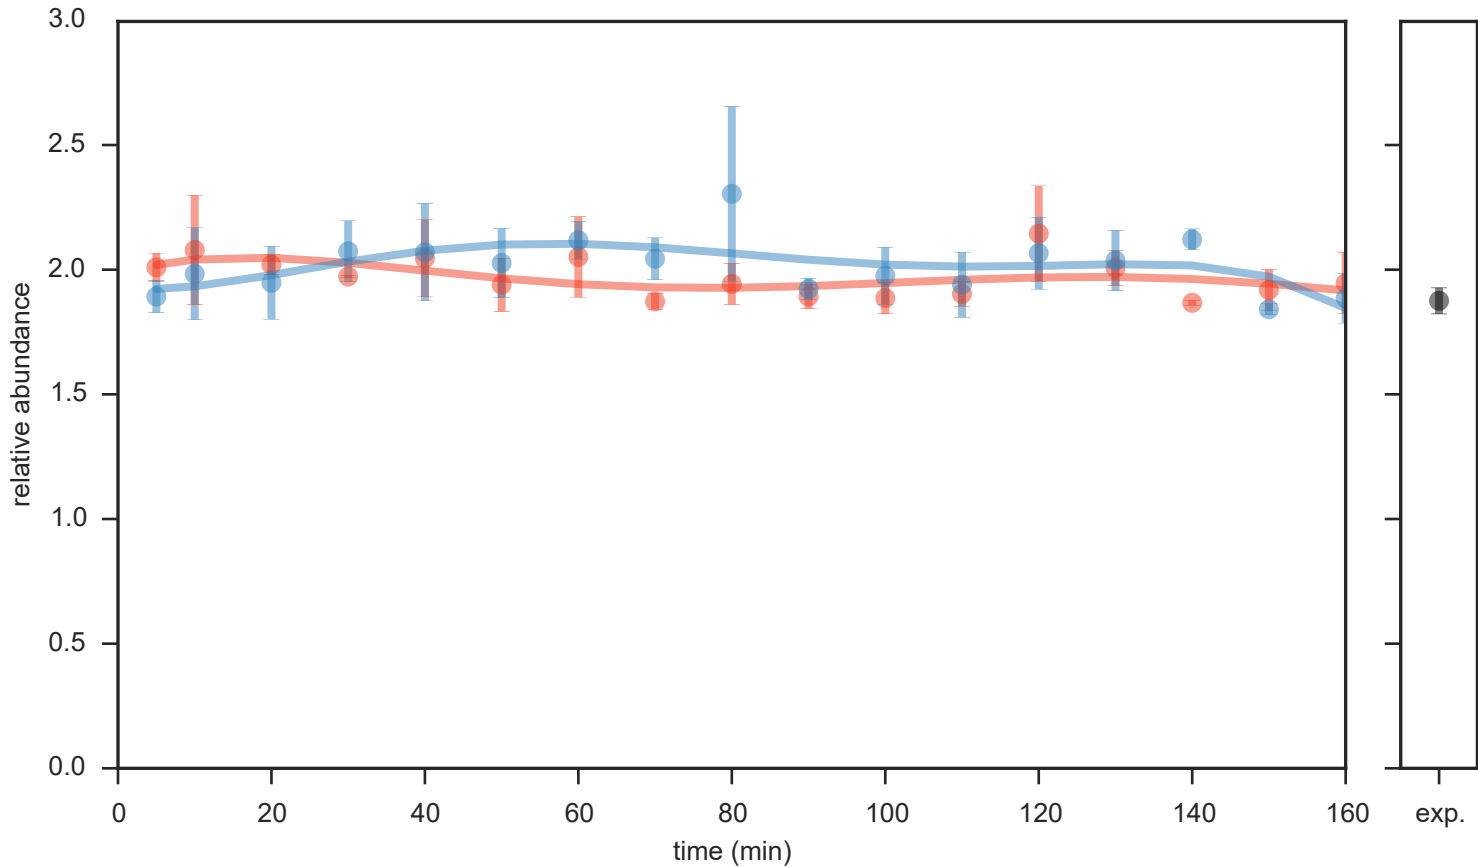

idms\_pid319\_mz246.19

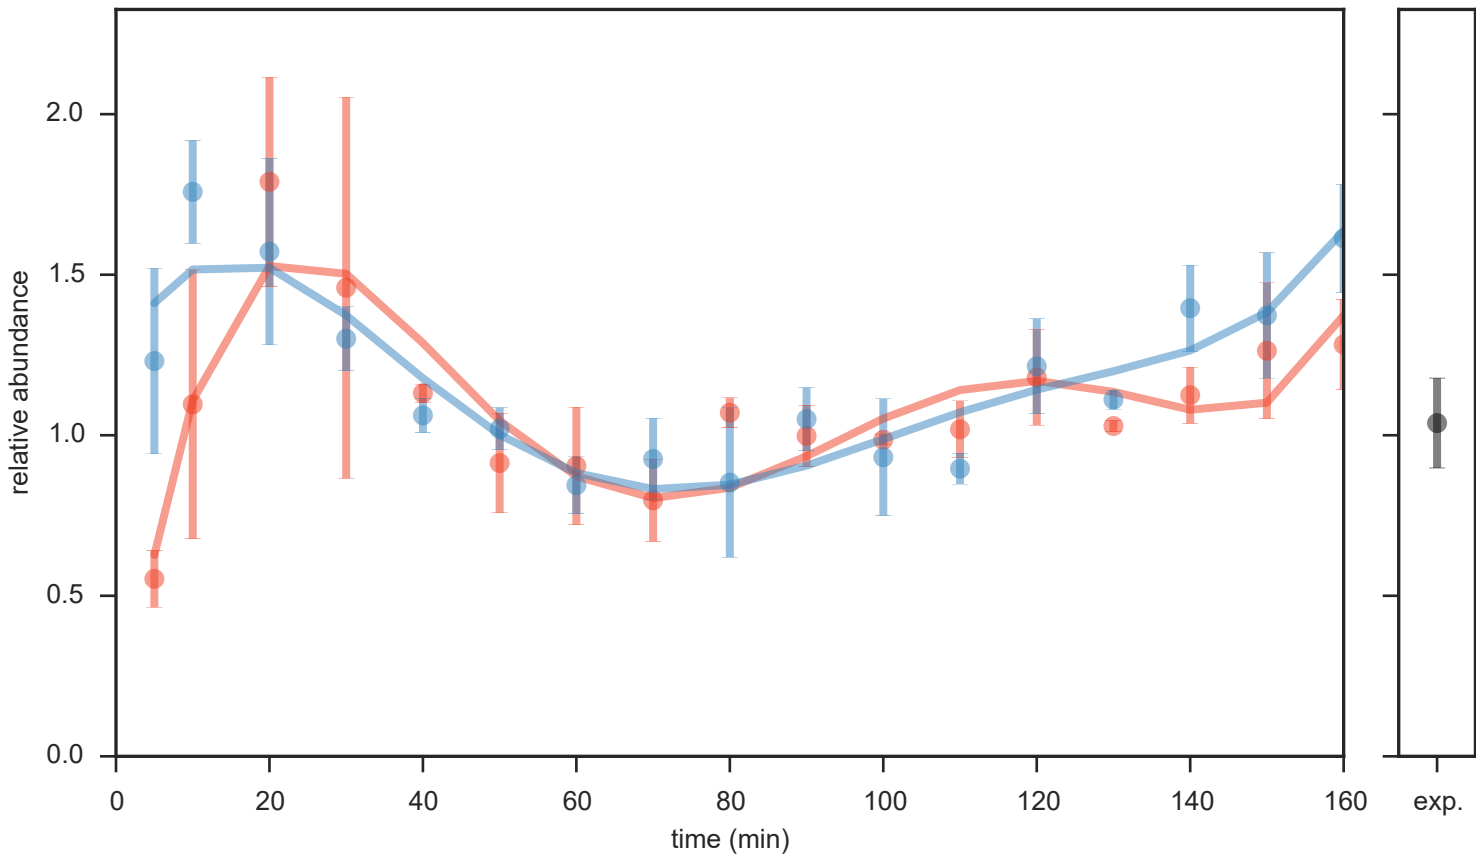

idms\_pid322\_mz275.00

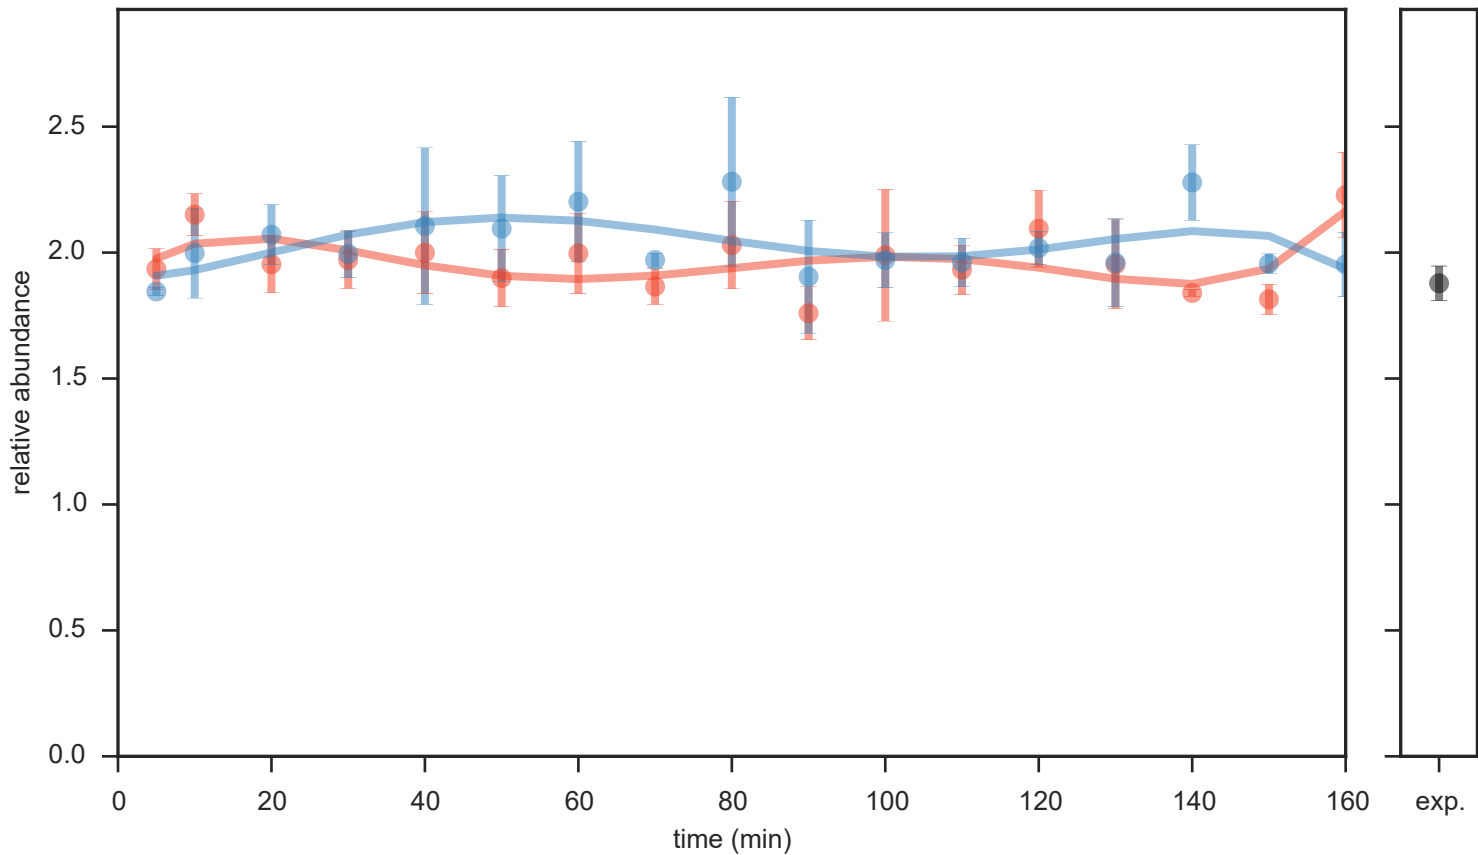

idms\_pid323\_mz141.13

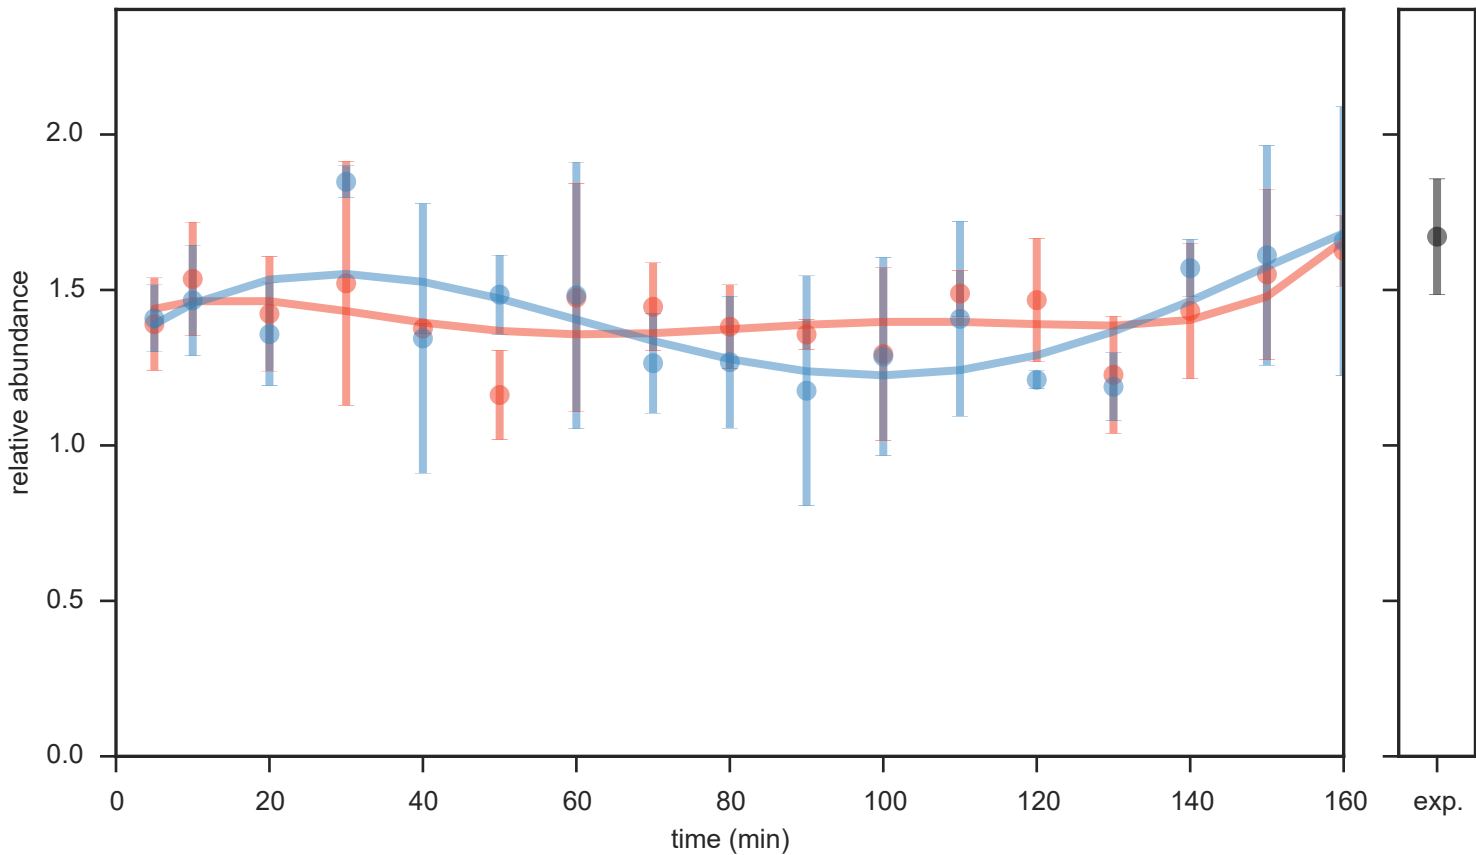

idms\_pid339\_mz132.11

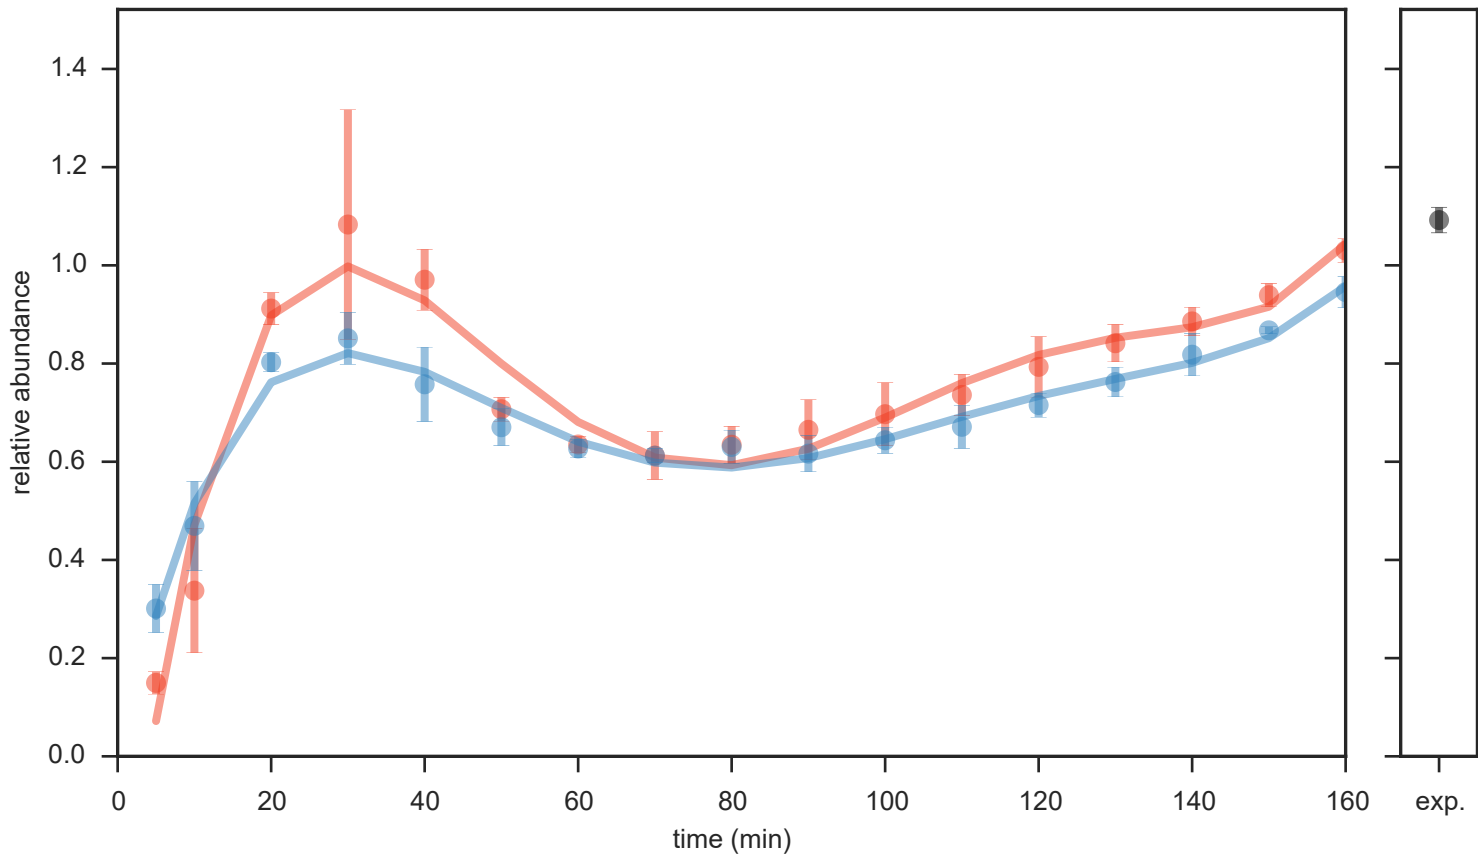



idms\_pid343\_mz280.27

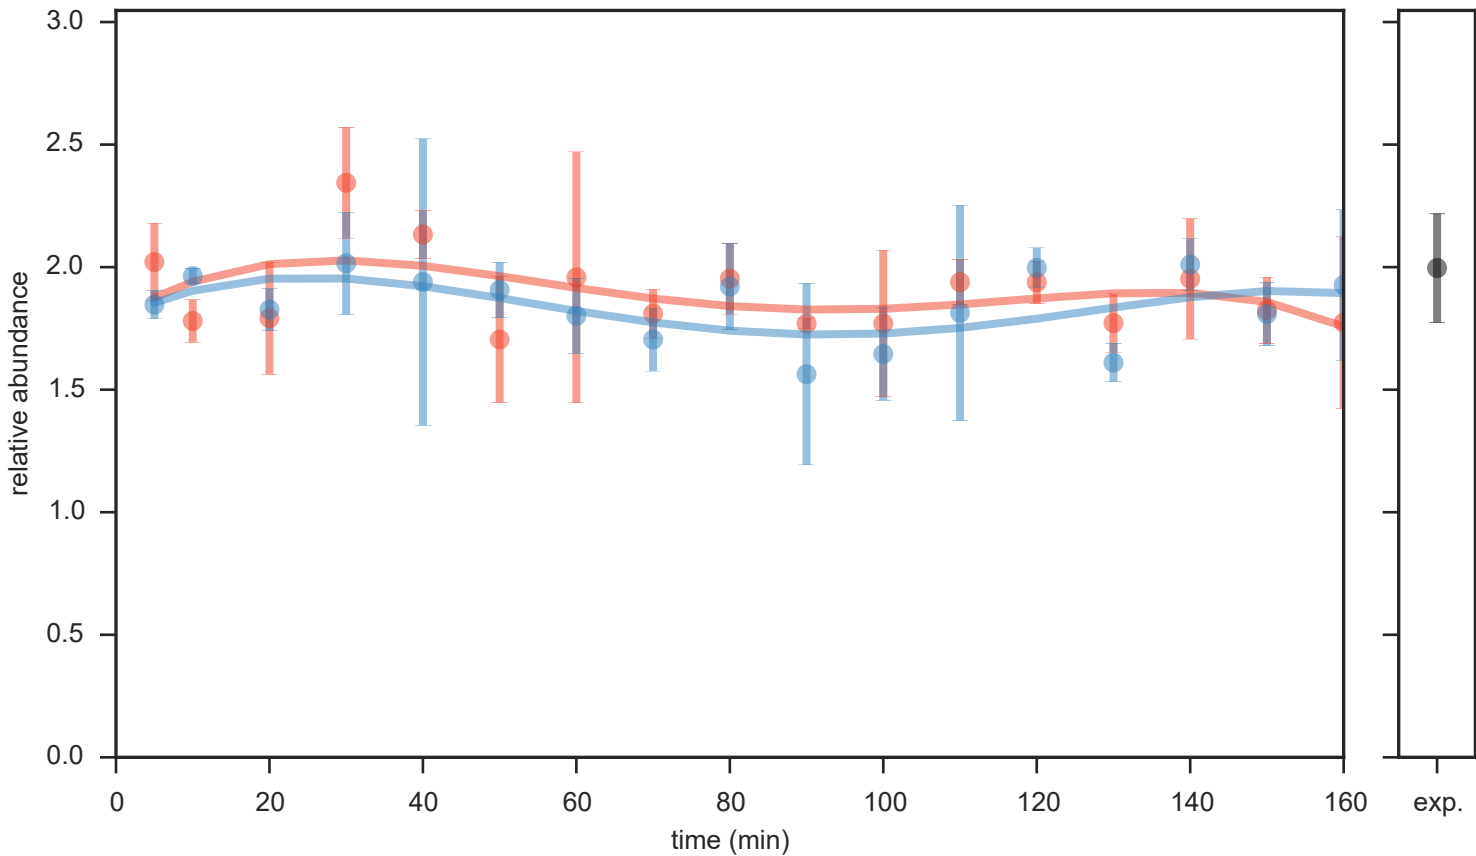

idms\_pid355\_mz86.096

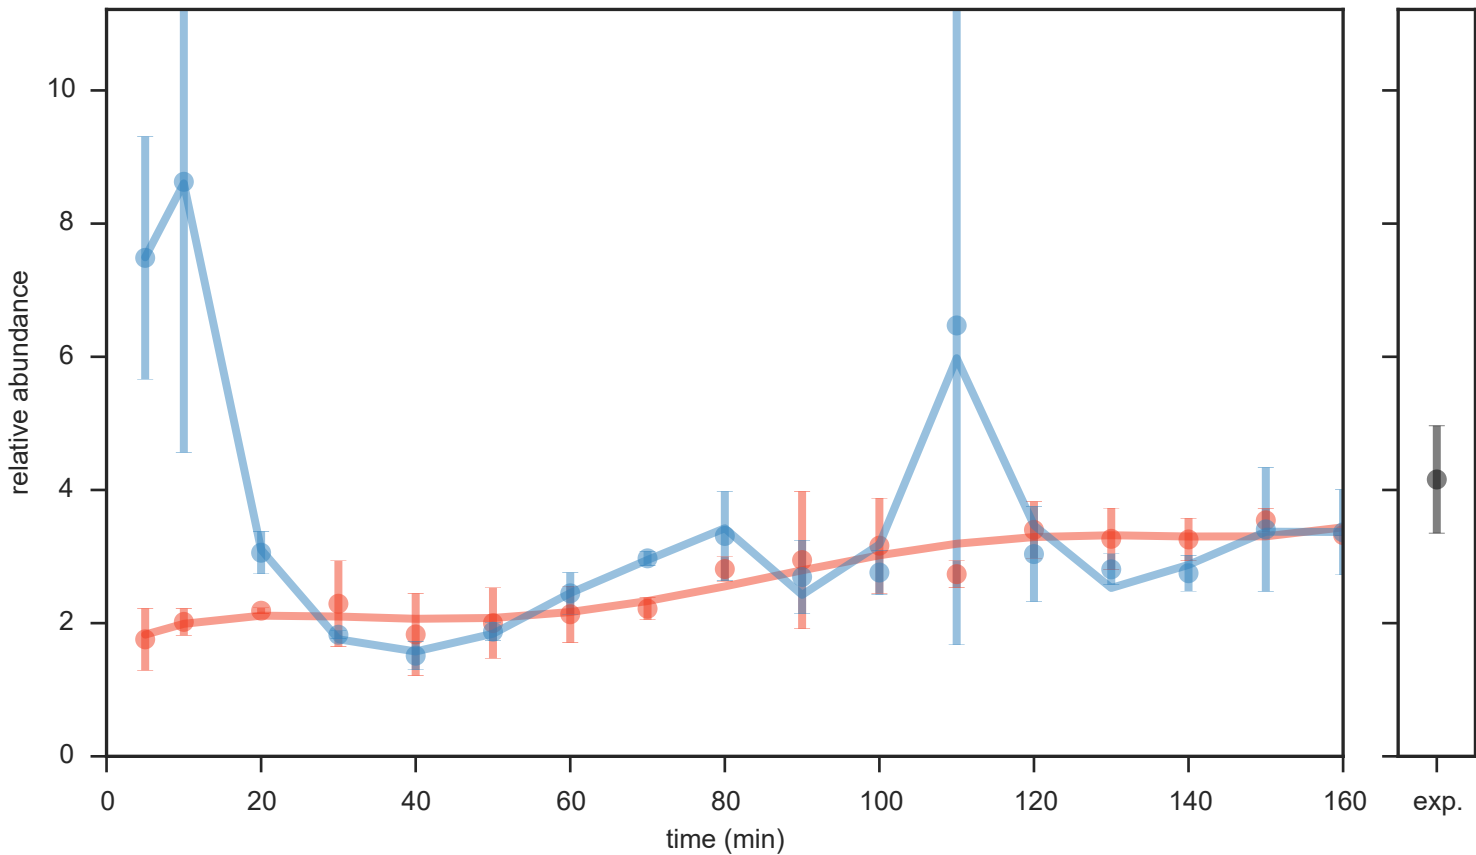

idms\_pid360\_mz256.10

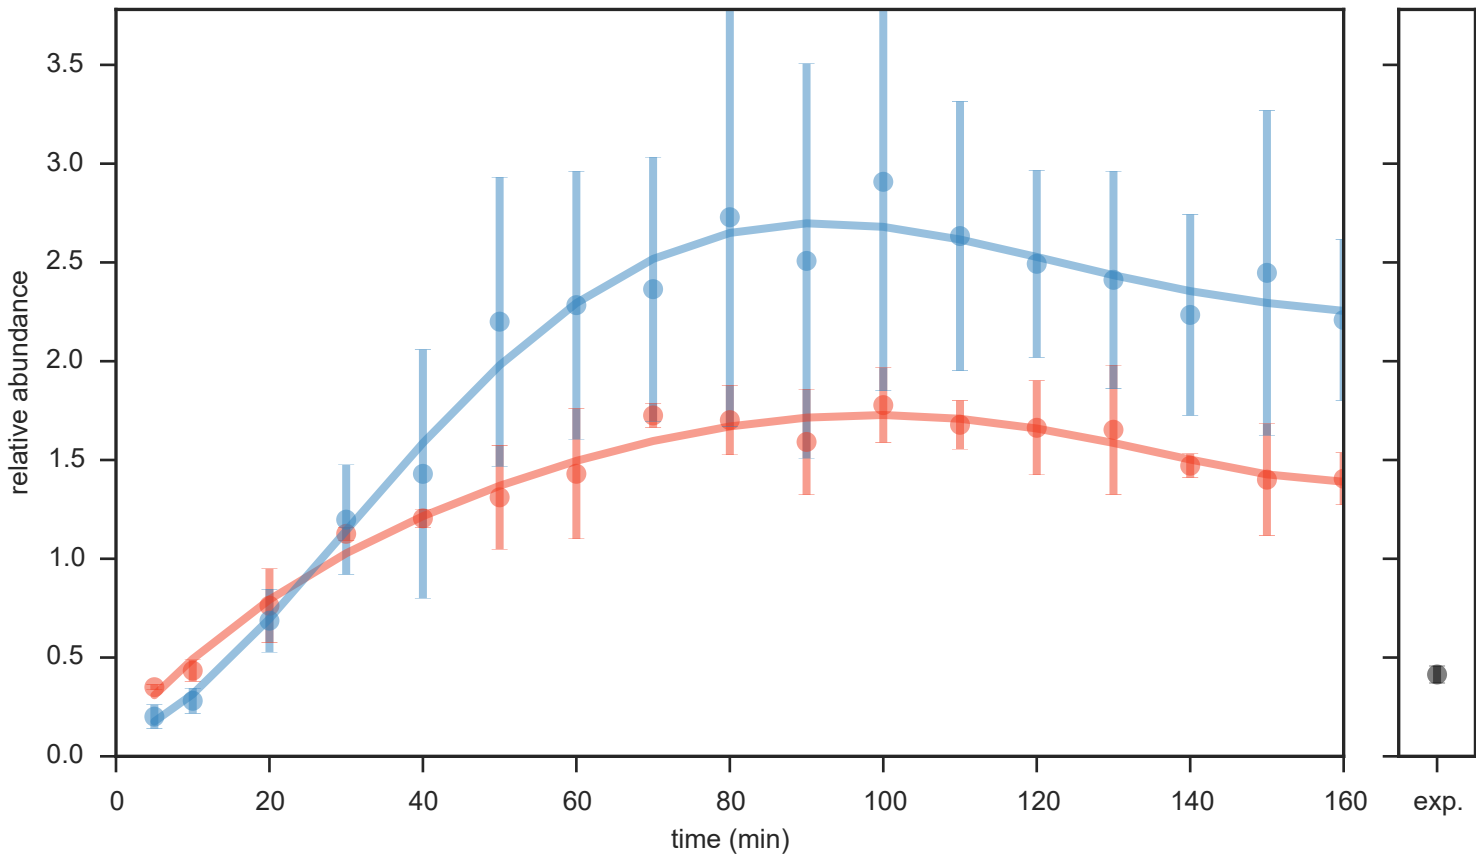

idms\_pid371\_mz210.16

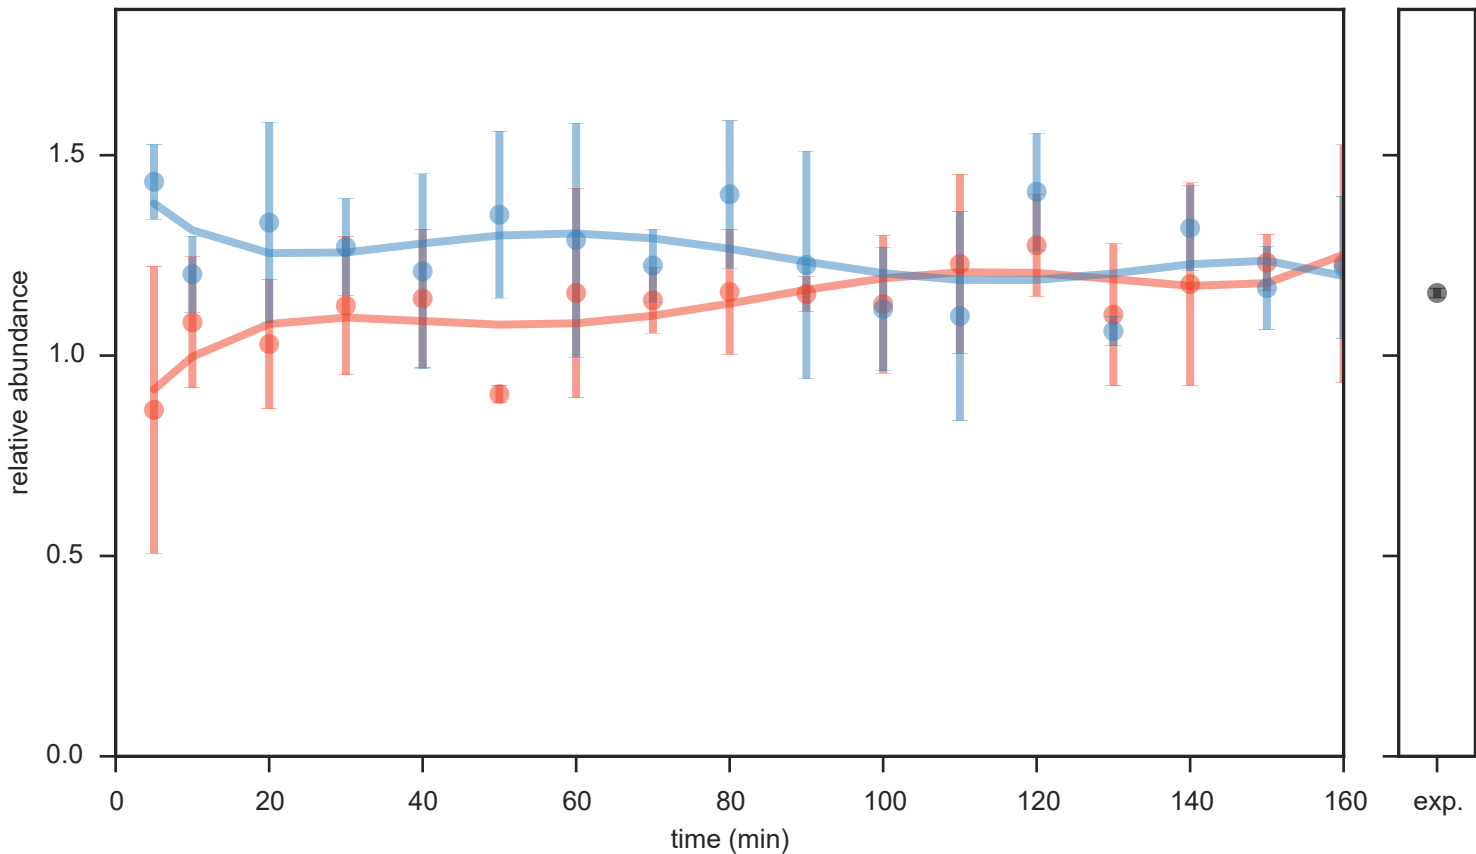

idms\_pid413\_mz123.05

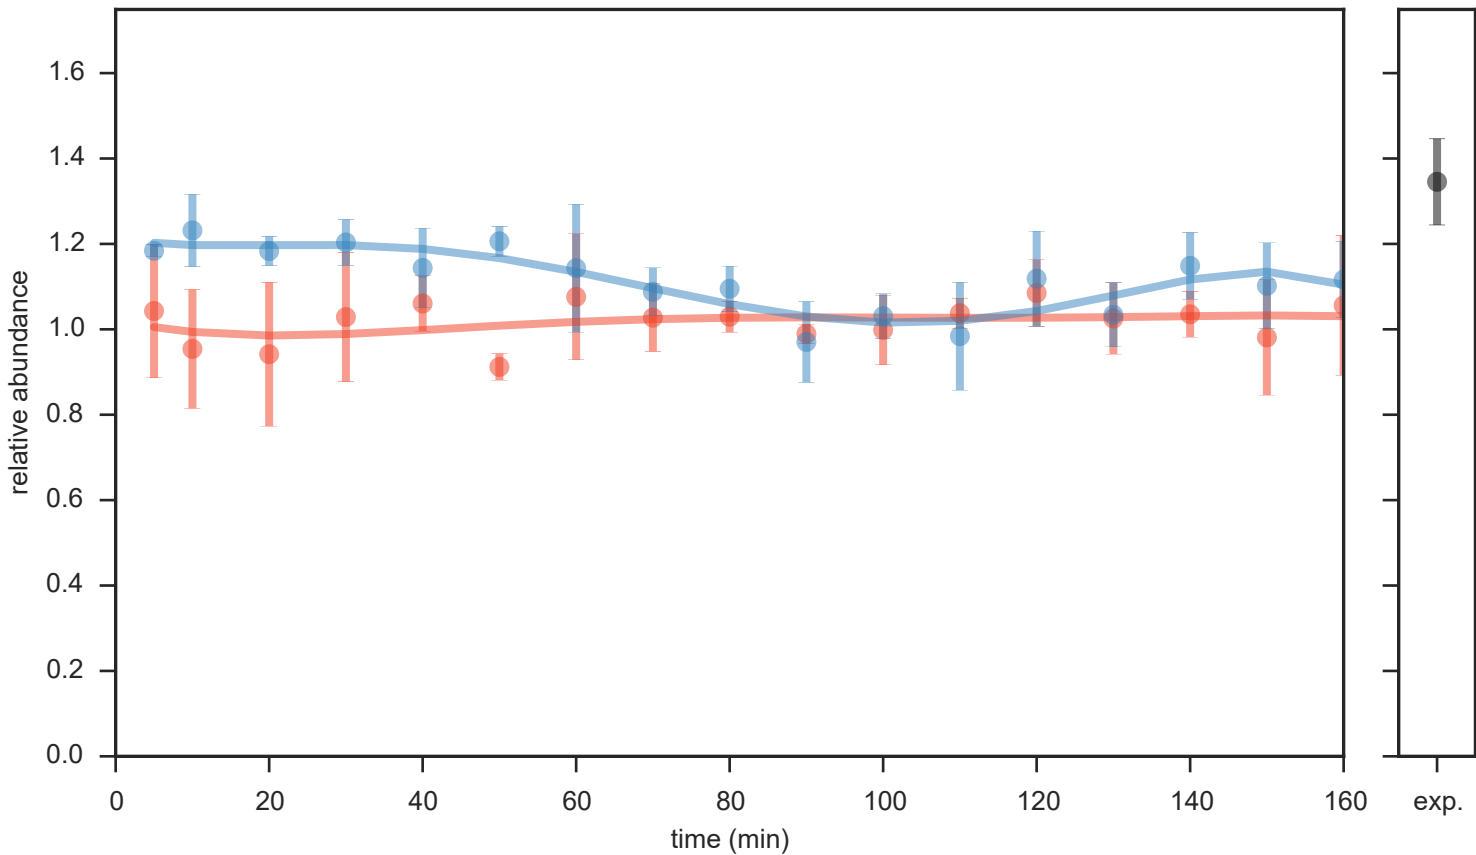

idms\_pid454\_mz279.98

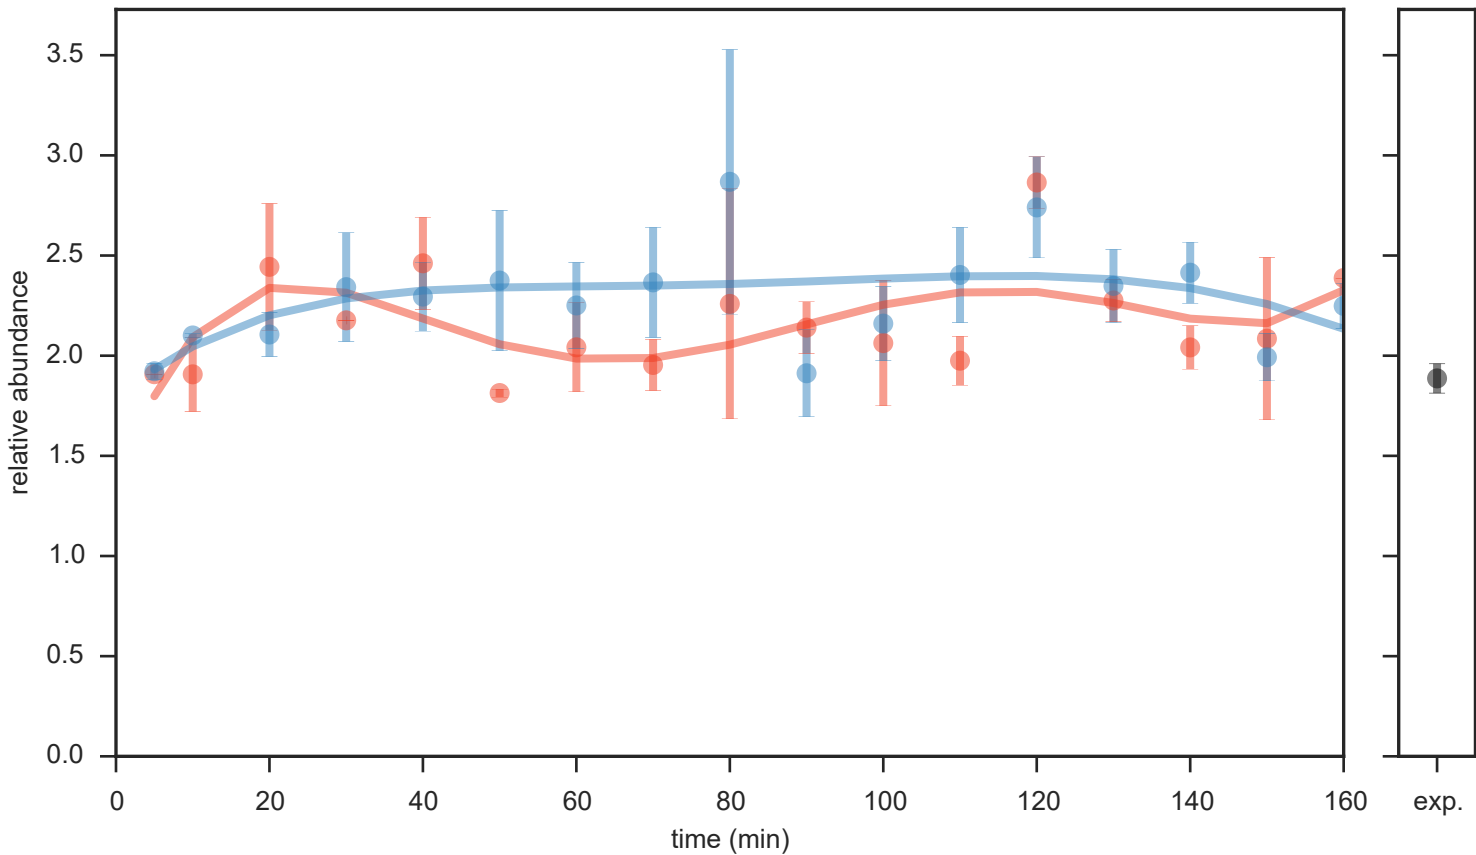

idms\_pid457\_mz276.10

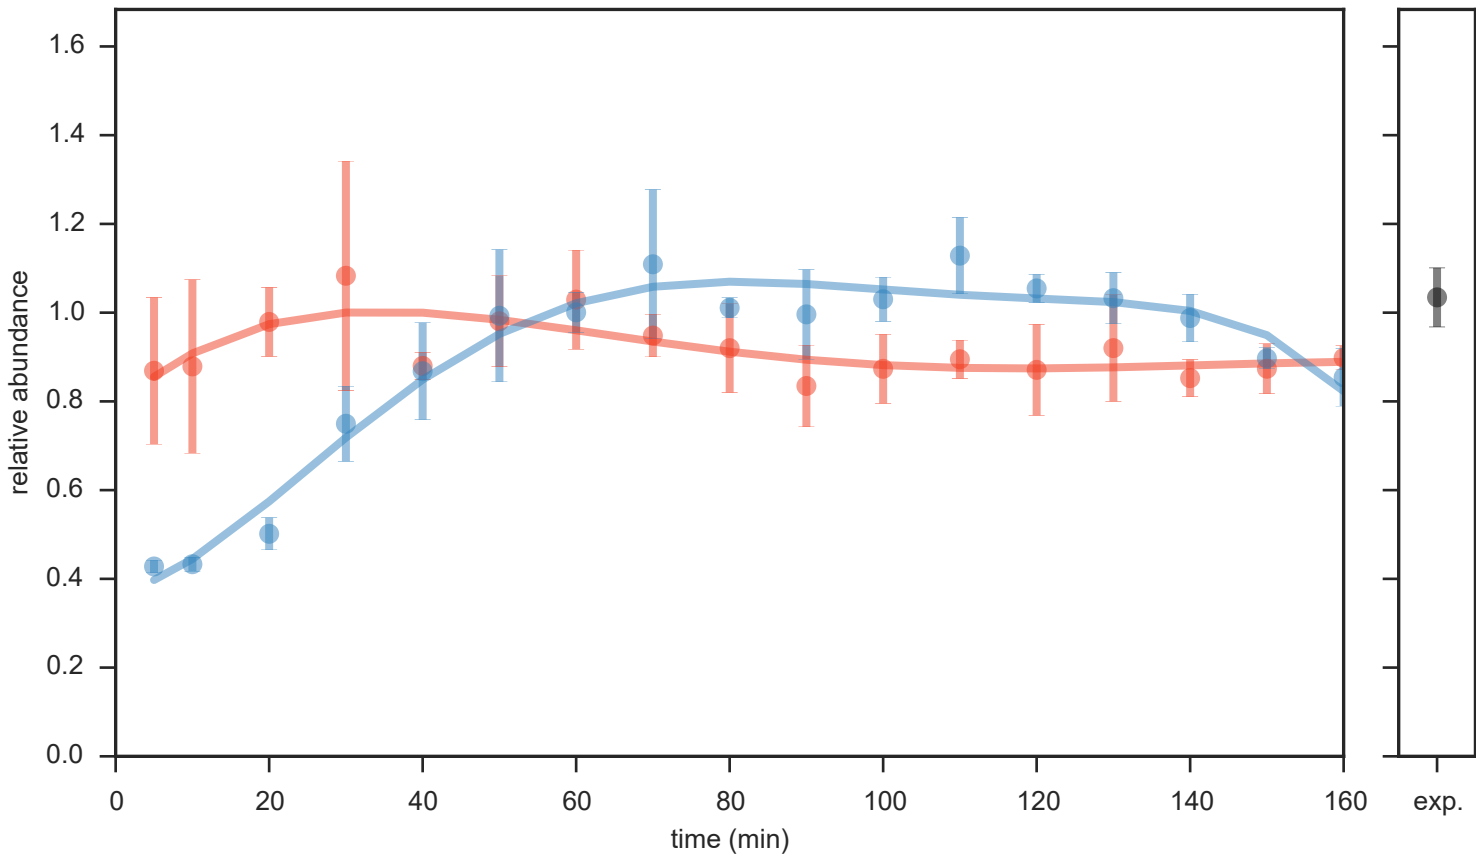

idms\_pid459\_mz136.06

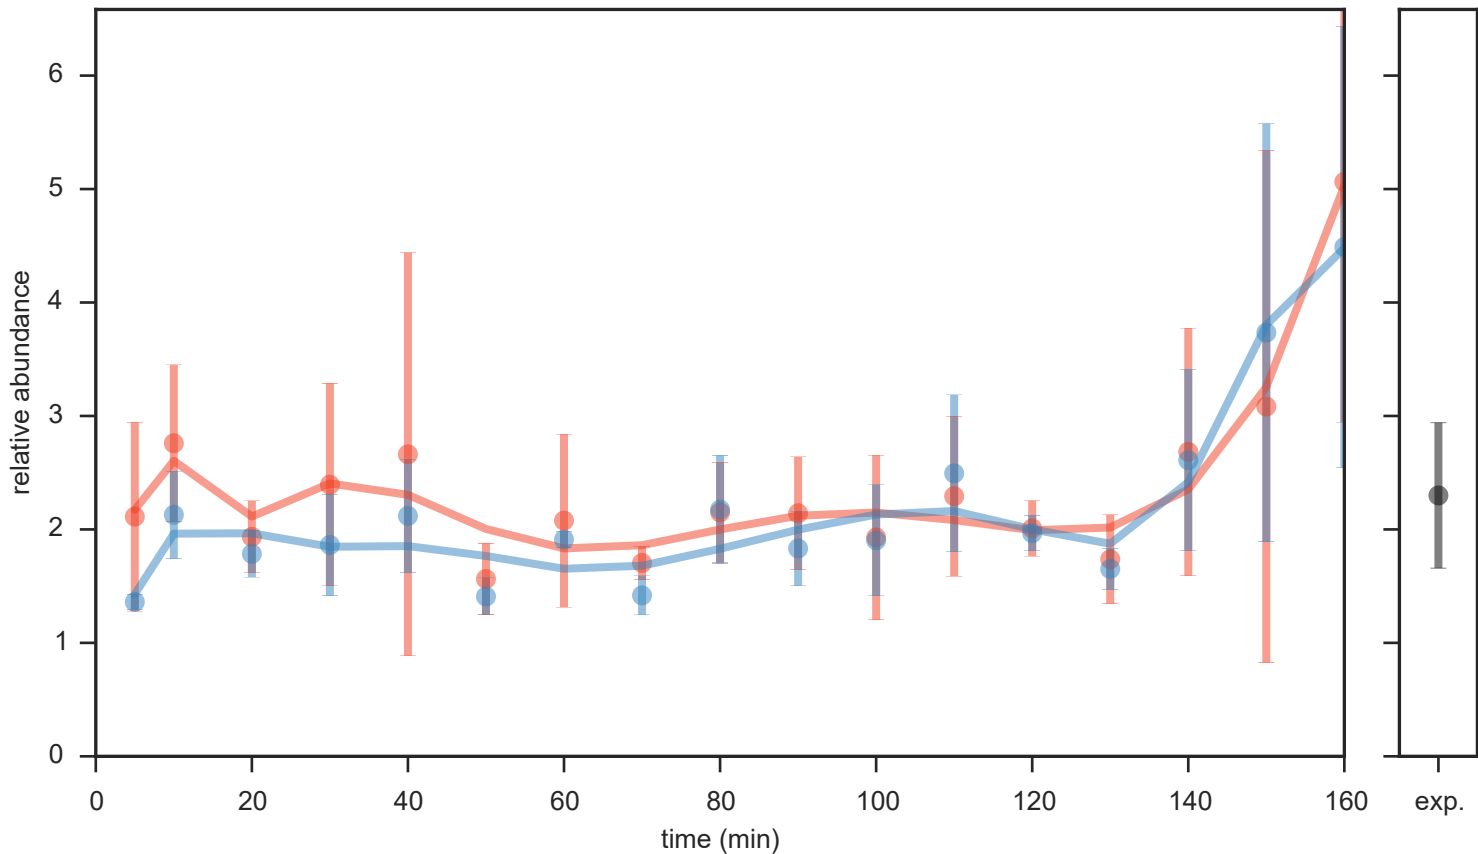



idms\_pid476\_mz166.08

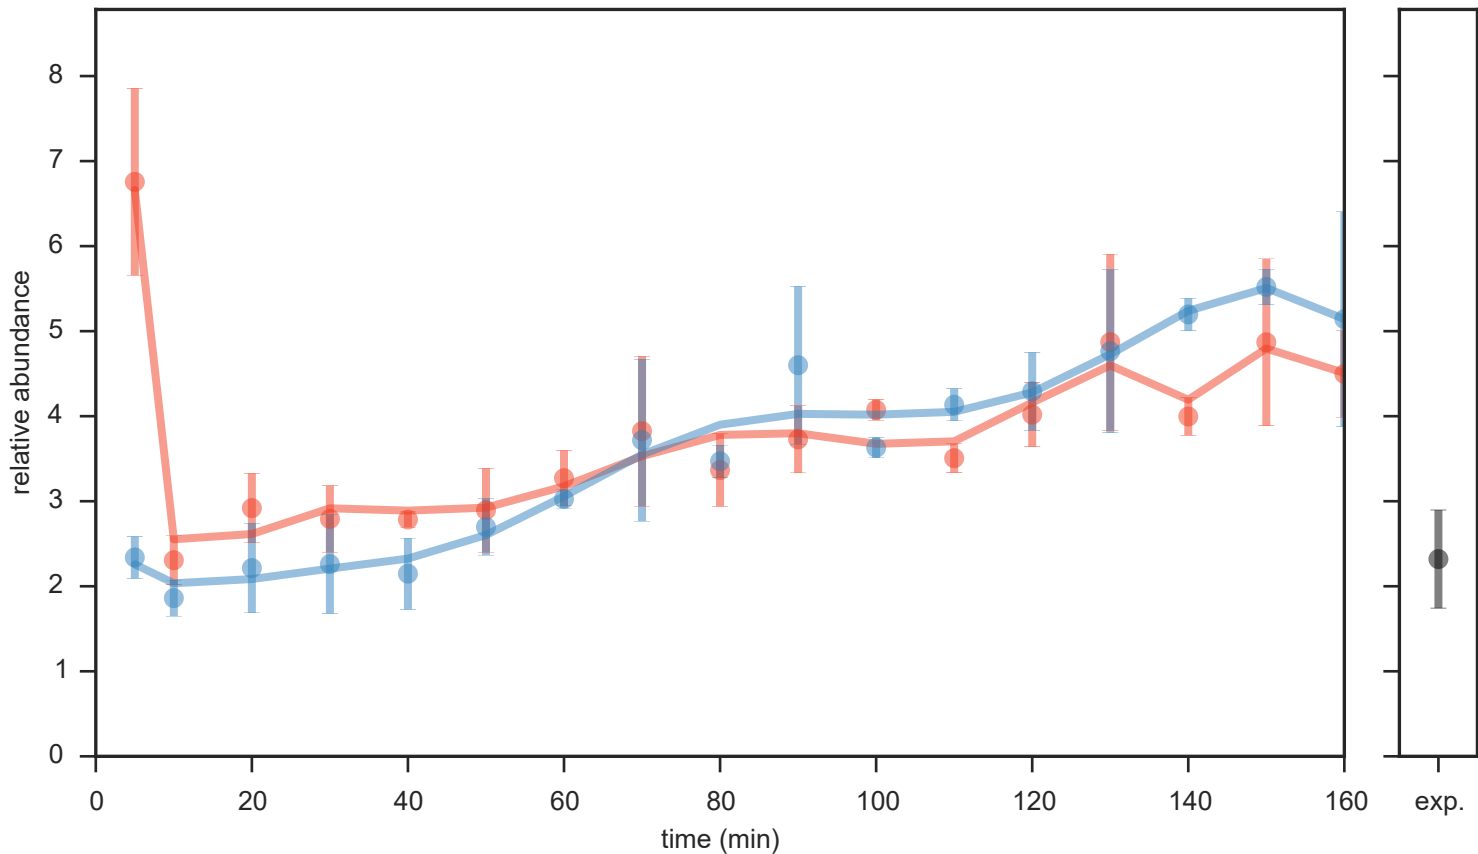

idms\_pid486\_mz219.09

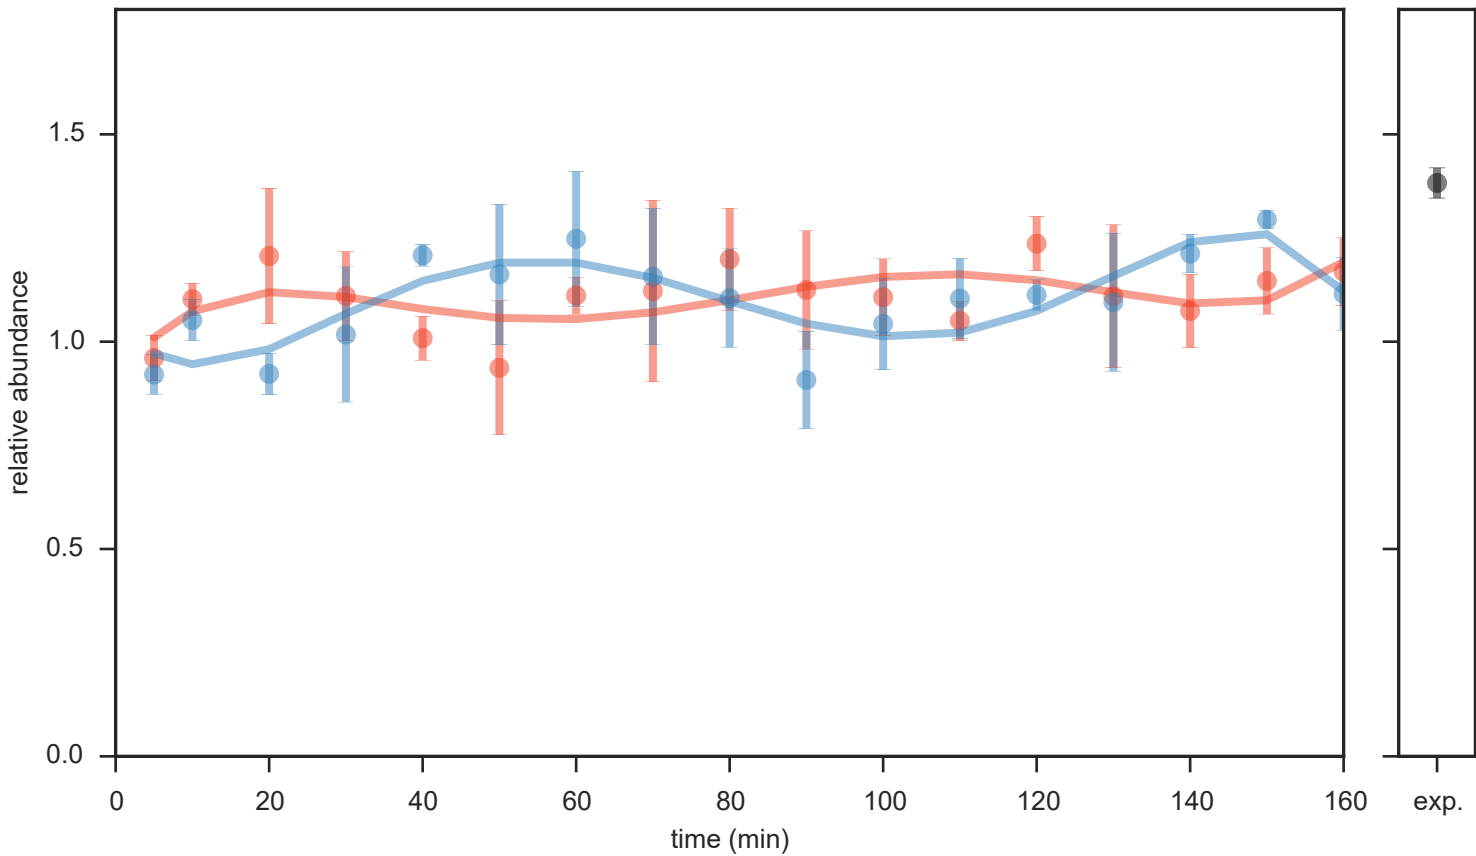

idms\_pid535\_mz224.21

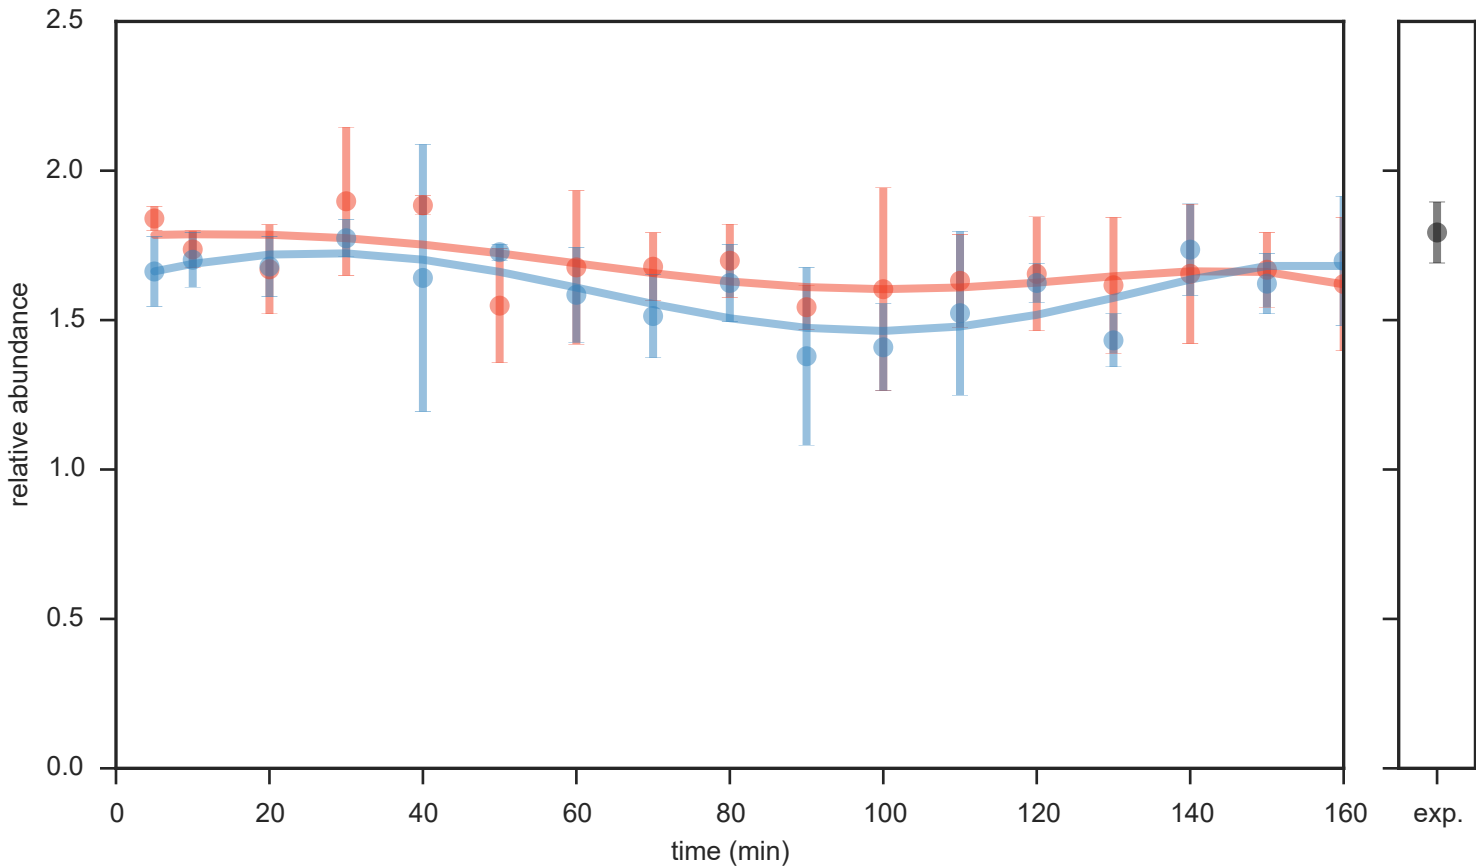

idms\_pid553\_mz123.05

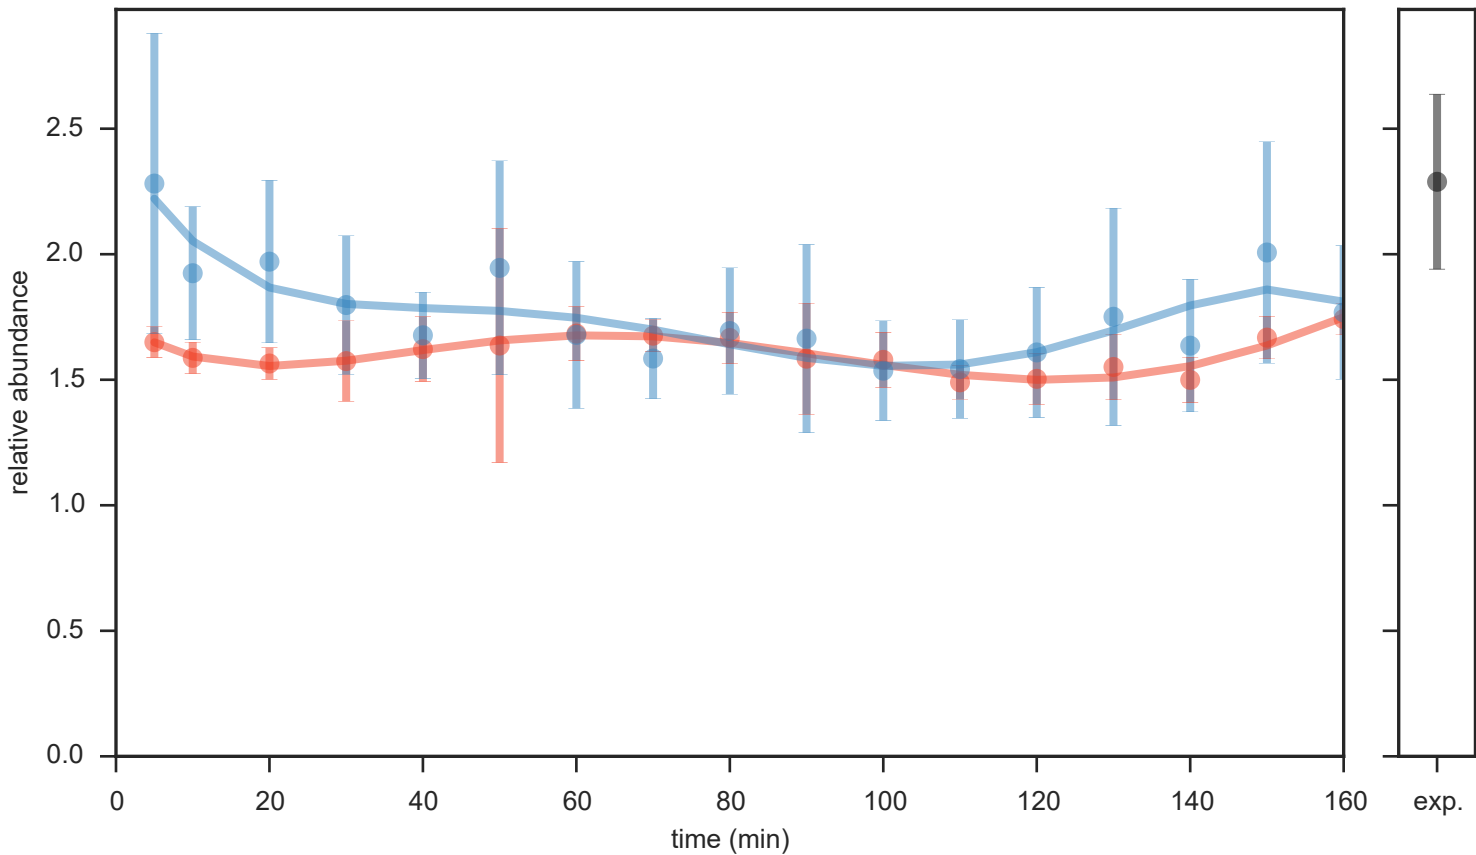

idms\_pid569\_mz422.03

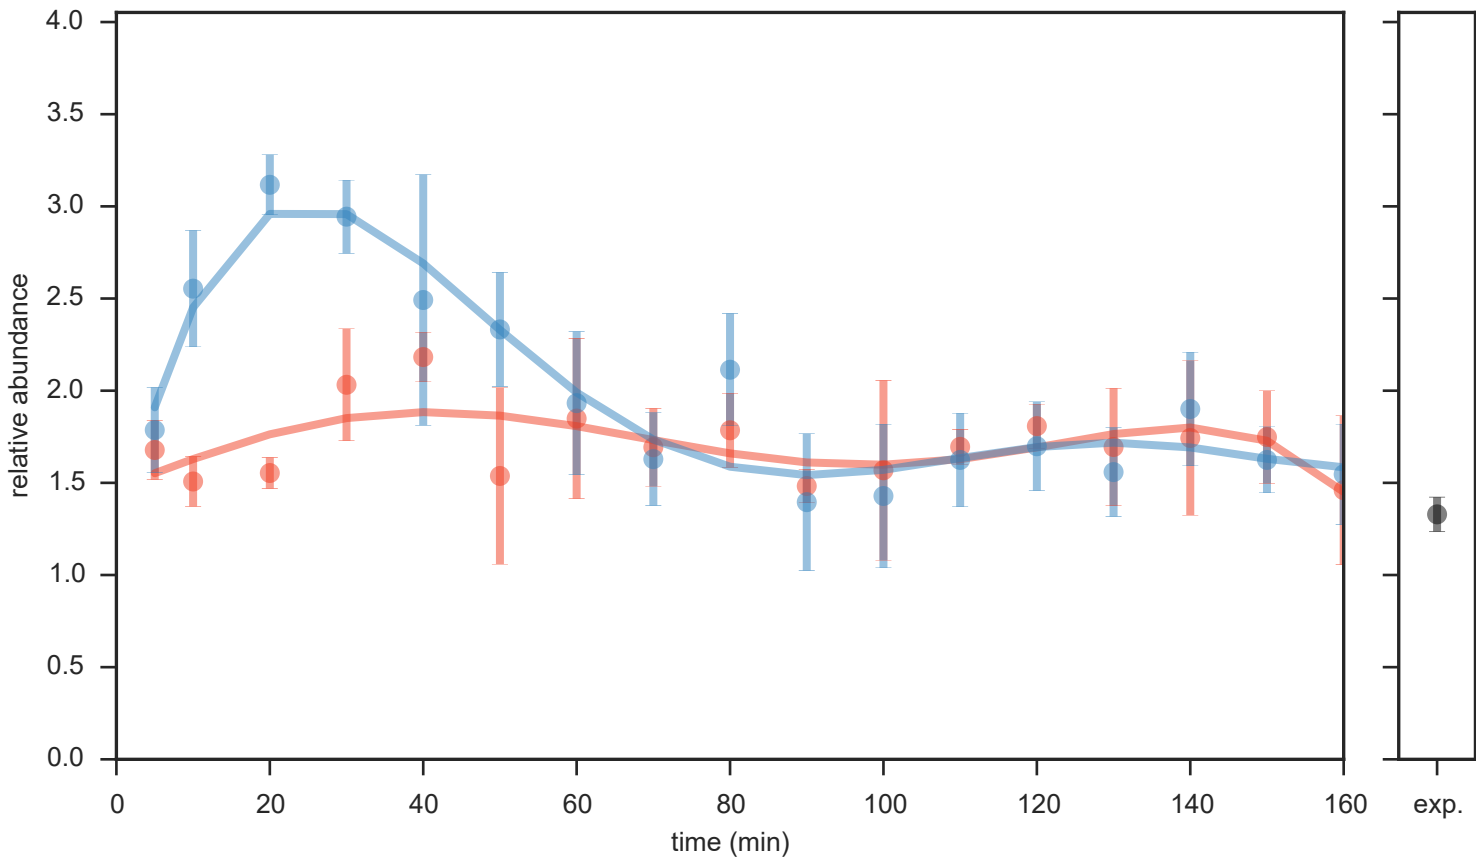

idms\_pid588\_mz352.15

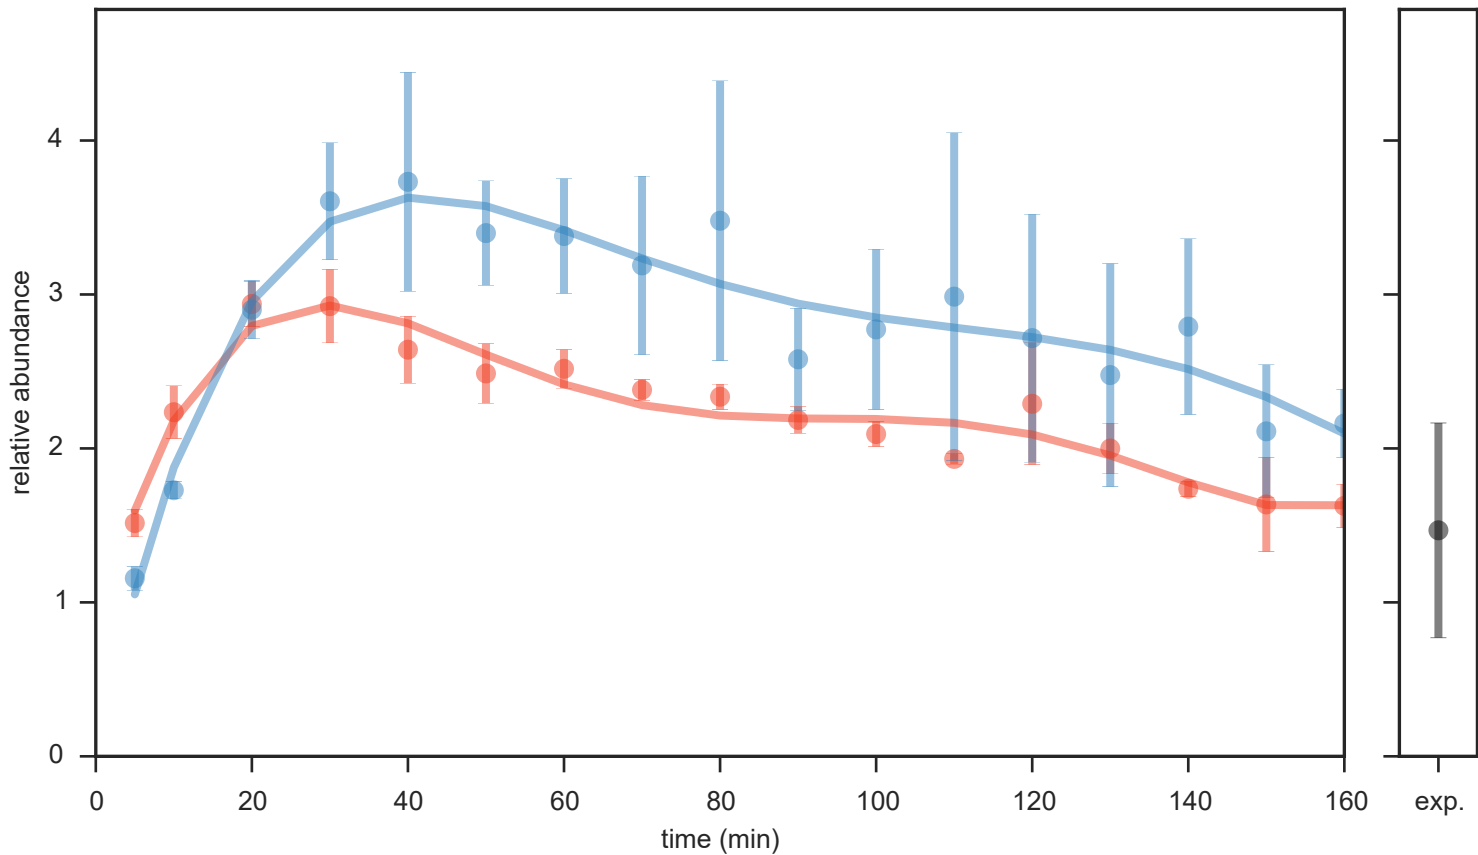

idms\_pid598\_mz197.11

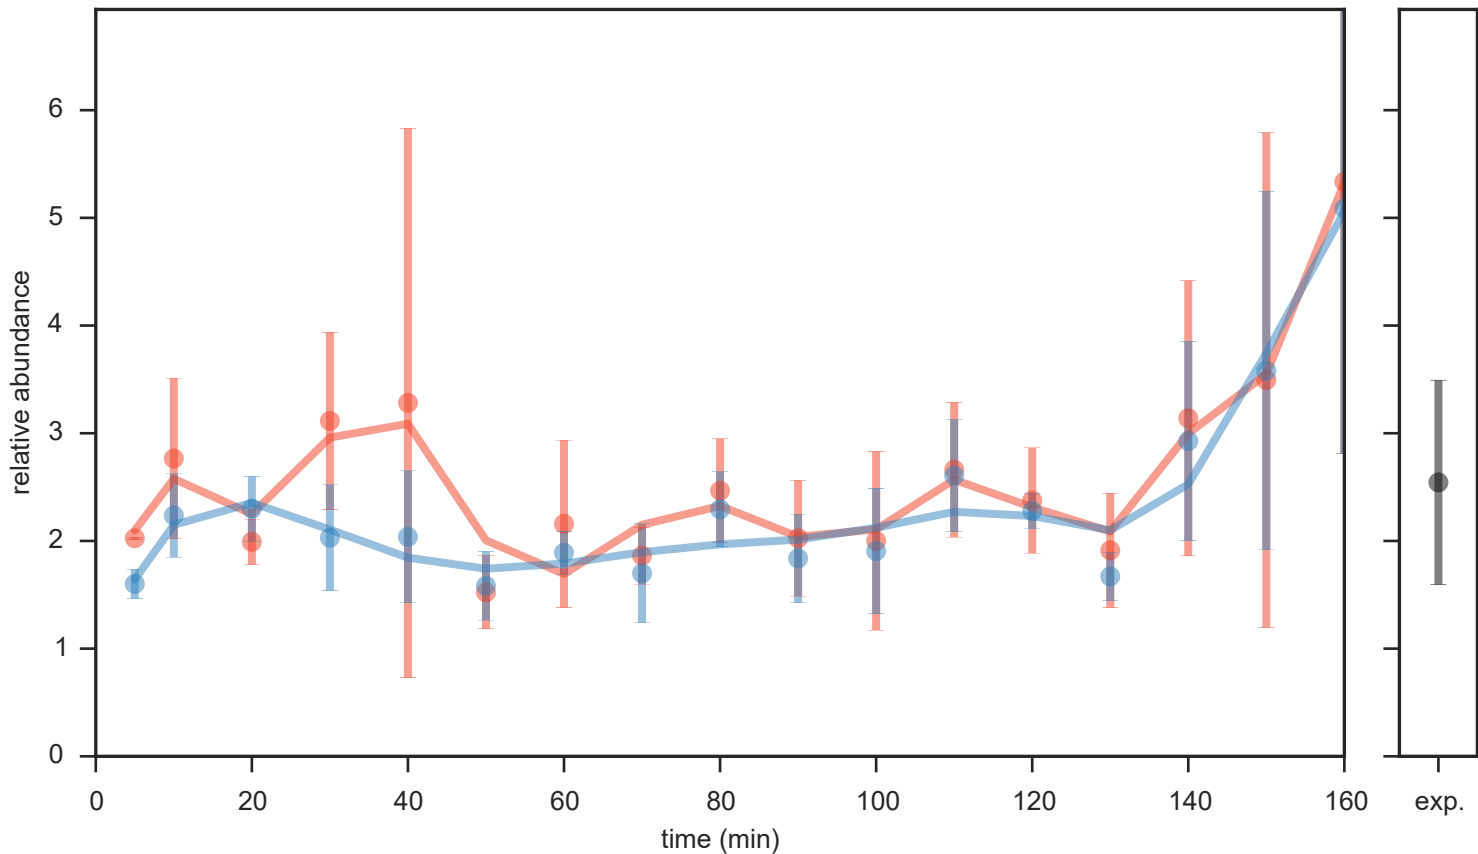

idms\_pid645\_mz240.20

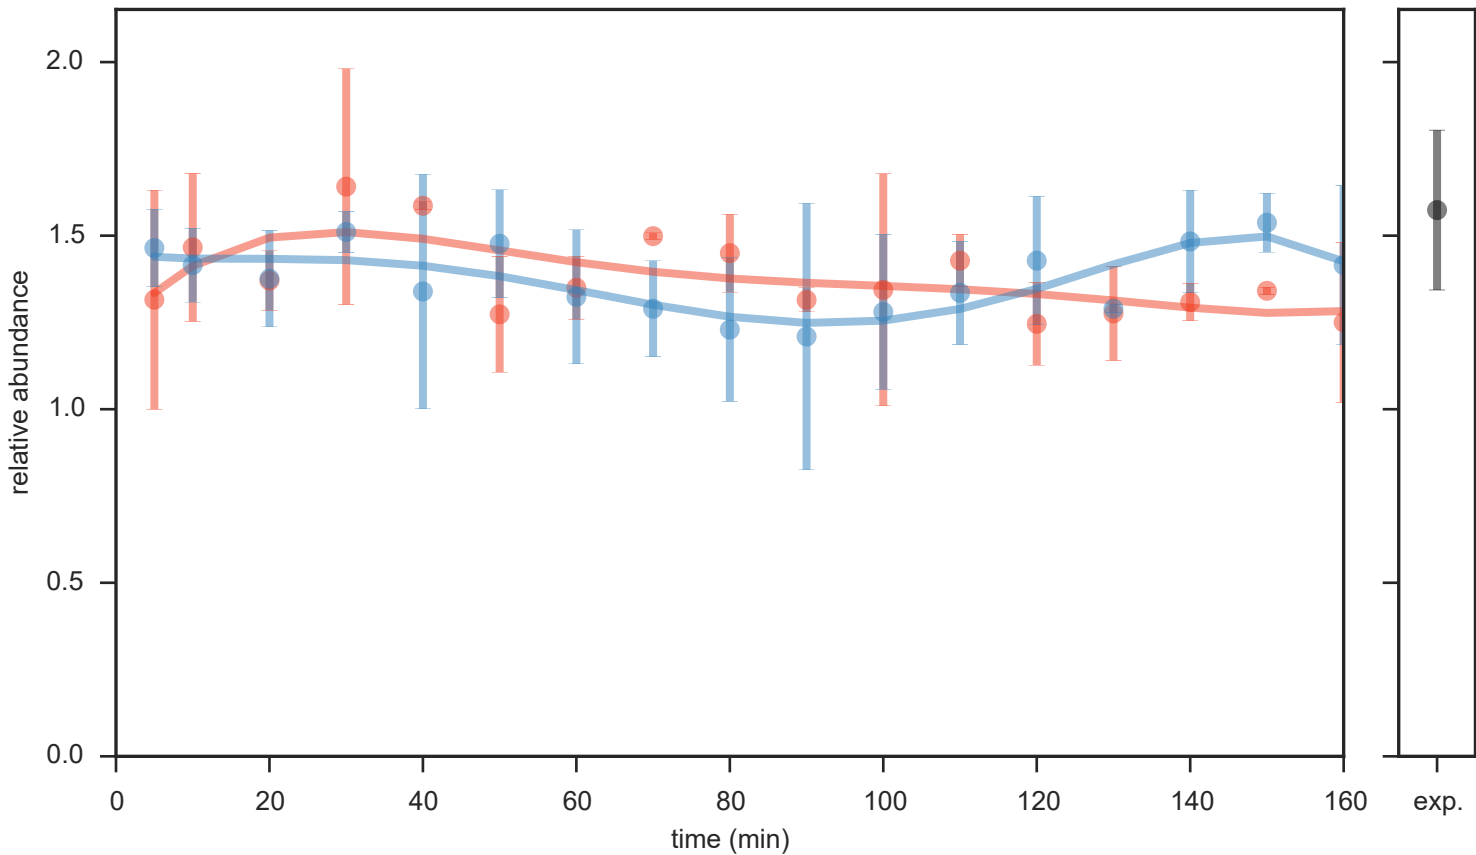



idms\_pid741\_mz131.12

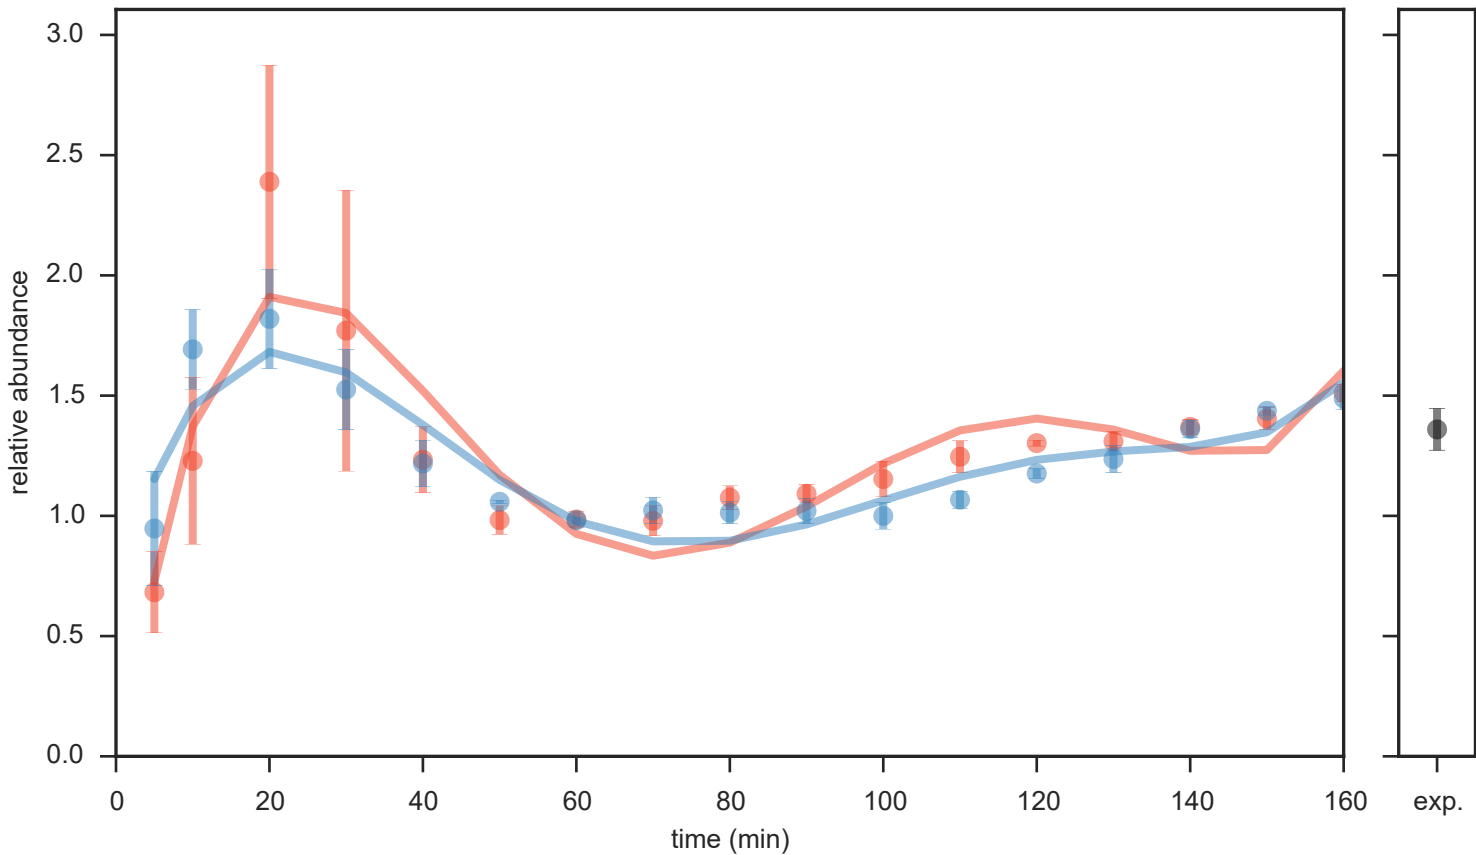

idms\_pid779\_mz321.16

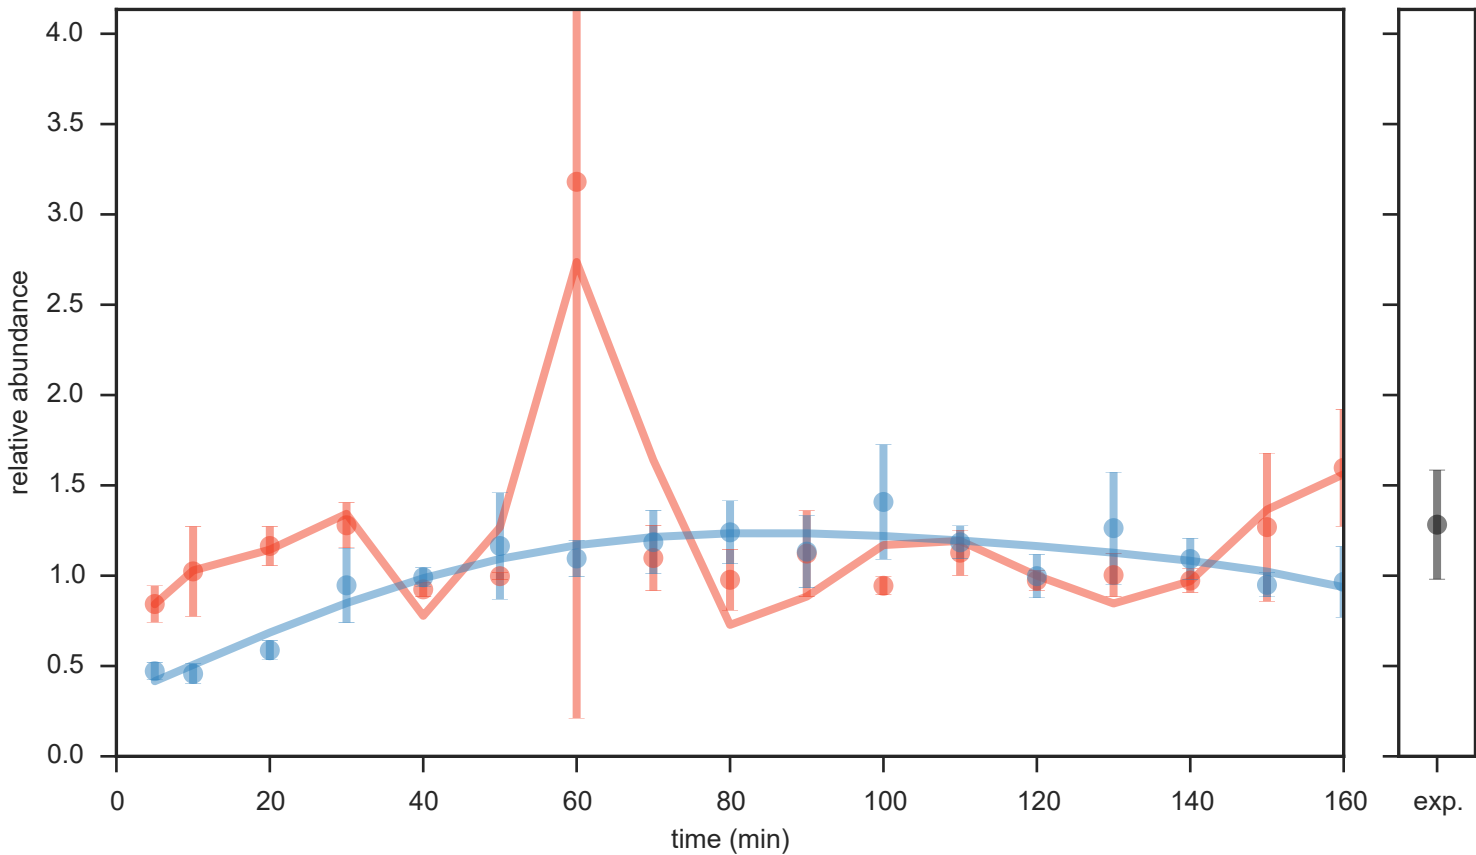

Supplement: EMS85252-supplement-Supplementary_Data_2.pdf [file EMS85252-supplement-Supplementary_Data_2.pdf]
