# Supplementary material
Source: PubMed Central journal article supplement (PMC7035108)

Supplementary data 3. Clustermap of metabolite abundance profiles throughout one cell cycle. Response was calculated based on the ratio of synchronized vs. asynchronous control cultures over time (based on mean values n=3 biological replicates per condition). Clustering based on *single* method agglomeration and cosine distance matrix.

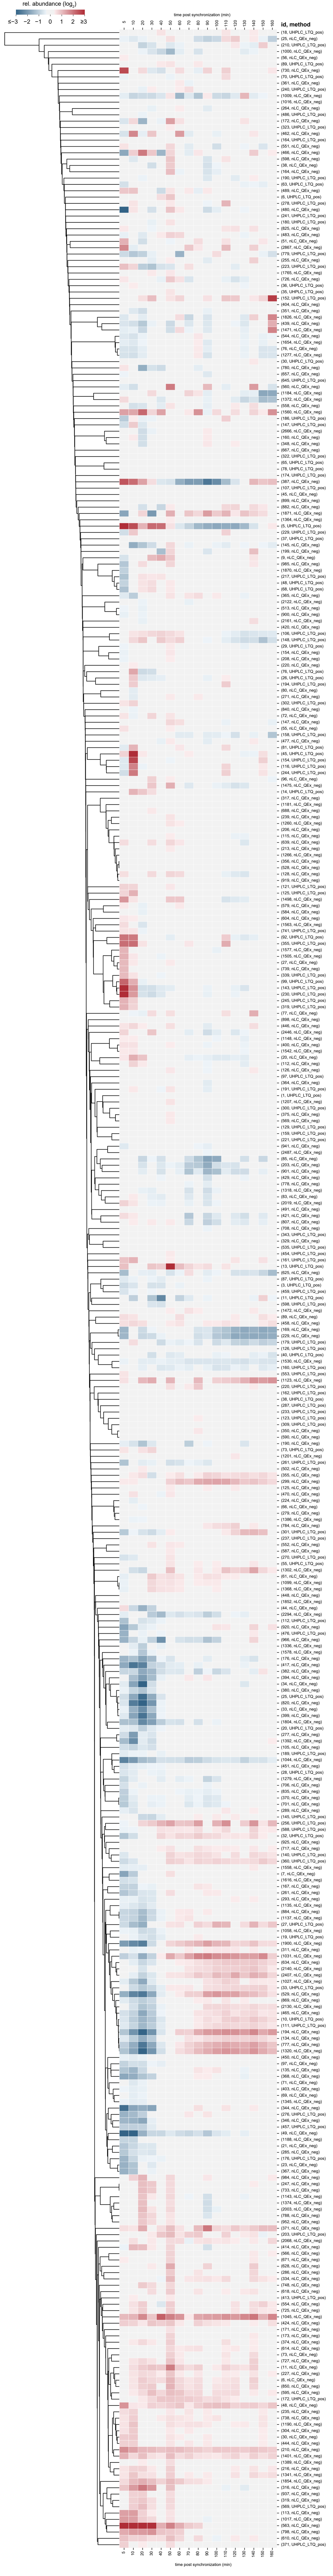

Supplement: EMS85252-supplement-Supplementary_Data_3.pdf [file EMS85252-supplement-Supplementary_Data_3.pdf]
